# Supplementary material for: Multi-omics approaches confirm metal ions mediate the main toxicological pathways of metal-bearing nanoparticles in lung epithelial A549 cells
Source: Royal Society of Chemistry journal article supplement (doi:10.1039/c8en00071a), 2018-01-01
Supplement: c8en00071a1.pdf [file c8en00071a1.pdf]

### ESI 1: Cytotoxicity of tested particles to A549 cells

**Table S1:** Overview of EC20 and confidence interval for dose calculation.

| Test material             | EC20 Exponential model $\mu\text{g/mL}$ | Confidence interval $\mu\text{g/mL}$ | EC20 Hill model $\mu\text{g/mL}$ | Confidence interval $\mu\text{g/mL}$ | Selected Dose <sup>2</sup> $\mu\text{g/mL}$ |
|---------------------------|-----------------------------------------|--------------------------------------|----------------------------------|--------------------------------------|---------------------------------------------|
| CeO <sub>2</sub> NP-A     | n.d. <sup>1</sup>                       |                                      | n.d.                             |                                      | 128                                         |
| CeO <sub>2</sub> NP-C     | n.d.                                    |                                      | n.d.                             |                                      | 128                                         |
| CeO <sub>2</sub> NP-E     | n.d.                                    |                                      | n.d.                             |                                      | 128                                         |
| CeO <sub>2</sub> NP-NM212 | n.d.                                    |                                      | n.d.                             |                                      | 128                                         |
| ZnO NP-NM110              | 29.4                                    | 22.4-37.3                            | 33.9                             | 29.2-38.9                            | 31.6                                        |
| ZnO NP-NM111              | 23.3                                    | 16.9-30.6                            | 42.6                             | 37.9-51.4                            | 32.9                                        |
| ZnO MP                    | 57.6                                    | 54.9-61.6                            | 57                               | 54.3-61.1                            | 57.3                                        |
| ZnCl <sub>2</sub>         | 19.7                                    | 14.2- 26.1                           | 29.4                             | 27.7-31.4                            | 24.5                                        |
| Ag NP-NM300K              | 37.9                                    | 33.5 – 50.1                          | 39.3                             | 34.0-49.7                            | 38.6                                        |
| Ag MP                     | n.d.                                    |                                      | n.d.                             |                                      | 128                                         |
| AgNO <sub>3</sub>         | 9.6                                     | 2.6 – 12.8                           | 10.1                             | 5.2 – 11.3                           | 9.8                                         |

<sup>1</sup> n.d. = dose could not be determined, highest dose (i.e. 128  $\mu\text{g/mL}$ ) was used for the omics experiments.

<sup>2</sup> Selected Dose = the highest concentration tested or the average of the EC20s of the Exponential and Hill model

Supplementary material of:

Susan Dekkers<sup>\*1</sup>, Tim D. Williams<sup>\*2</sup>, Jinkang Zhang<sup>2</sup>, Jiarui (Albert) Zhou<sup>3</sup>, Rob J. Vandebriel<sup>1</sup>, Liset J.J. De La Fonteyne<sup>1</sup>, Eric R. Gremmer<sup>1</sup>, Shan He<sup>3</sup>, Emily J. Guggenheim<sup>4</sup>, Iseult Lynch<sup>4</sup>, Flemming R. Cassee<sup>1,5</sup>, Wim H. De Jong<sup>1</sup>, Mark R. Viant<sup>2</sup>. Multi-omics approaches confirm metal ions mediate the main toxicological pathways of metal-bearing nanoparticles in lung epithelial A549 cells. *Environmental Science Nano*. Corresponding author: susan.dekkers@rivm.nl.
