# Supplementary material for: Multi-omics approaches confirm metal ions mediate the main toxicological pathways of metal-bearing nanoparticles in lung epithelial A549 cells
Source: Royal Society of Chemistry journal article supplement (doi:10.1039/c8en00071a), 2018-01-01
Supplement: c8en00071a4.xlsx [file c8en00071a4.xlsx]

## Sheet: Sheet1
ESI 4: Univariate analyses of omics data
Results of univariate analyses comparing each treatment group with its time-matched control group for lipidomics, polar metabolomics and transcriptomics
Data are shown as fold change versus relevant control group, with false discovery rate corrected q-values or FDR.
Metabolites were identified from MI-Pack
Supplementary material of:
Susan Dekkers*1, Tim D. Williams*2, Jinkang Zhang2, Jiarui (Albert) Zhou3, Rob J. Vandebriel1, Liset J.J. De La Fonteyne1, Eric R. Gremmer1, Shan He3, Emily J. Guggenheim4, Iseult Lynch4, Flemming R. Cassee1,5, Wim H. De Jong1, Mark R. Viant2
Multi-omics approaches confirm metal ions mediate the main toxicological pathways of metal-bearing nanoparticles in lung epithelial A549 cells.
Environmental Science Nano. Corresponding author: susan.dekkers@rivm.nl.
No	Experiment	Technology	Exposure group	Peak m/z or Ensembl Gene ID	Fold change v time-matched control	q-value v time-matched control group	Name(s)	Empirical Formulae or Gene Symbol	HMDB IDs	LipidMAPs IDs
1	Ceria	Lipidomics	CeO2 NP-A 01h	none statistically significant at q<0.05
2	Ceria	Lipidomics	CeO2 NP-A 06h	598.517	0.17	0.025
3	Ceria	Lipidomics	CeO2 NP-A 24h	706.572	3.649	0.000704
4	Ceria	Lipidomics	CeO2 NP-A 24h	705.568	3.353	0.000704	['DG(18:3(9Z,12Z,15Z)/20:0/0:0)[iso2]', 'DG(18:2(9Z,12Z)/20:1(11Z)/0:0)[iso2]', 'DG(18:1(9Z)/20:2(11Z,14Z)/0:0)[iso2]', 'DG(18:0/20:3(8Z,11Z,14Z)/0:0)[iso2]', 'DG(16:0/22:3(10Z,13Z,16Z)/0:0)[iso2]', 'DG(16:1(9Z)/22:2(13Z,16Z)/0:0)[iso2]', 'DG(18:3(6Z,9Z,12Z)/20:0/0:0)[iso2]']	C41H74O5	HMDB07310;HMDB07253;HMDB07225;HMDB07169;HMDB07146;HMDB07281	LMGL02010098;LMGL02010099;LMGL02010100;LMGL02010101;LMGL02010116;LMGL02010137;LMGL02010484
5	Ceria	Lipidomics	CeO2 NP-A 24h	703.552	3.066	0.00146	['DG(18:3(9Z,12Z,15Z)/20:1(11Z)/0:0)[iso2]', 'DG(18:2(9Z,12Z)/20:2(11Z,14Z)/0:0)[iso2]', 'DG(18:1(9Z)/20:3(8Z,11Z,14Z)/0:0)[iso2]', 'DG(18:0/20:4(5Z,8Z,11Z,14Z)/0:0)[iso2]', 'DG(16:1(9Z)/22:3(10Z,13Z,16Z)/0:0)[iso2]', 'DG(16:0/22:4(7Z,10Z,13Z,16Z)/0:0)[iso2]', 'DG(18:3(6Z,9Z,12Z)/20:1(11Z)/0:0)[iso2]', 'DG(18:4(6Z,9Z,12Z,15Z)/20:0/0:0)[iso2]']	C41H72O5	HMDB07311;HMDB07254;HMDB07227;HMDB07170;HMDB07118;HMDB07282;HMDB07339	LMGL02010108;LMGL02010109;LMGL02010110;LMGL02010111;LMGL02010126;LMGL02010138;LMGL02010485;LMGL02010508
6	Ceria	Lipidomics	CeO2 NP-C 01h	646.614	2.199	0.0419	['Cer(d18:1/24:1(15Z))']	C42H81NO3	HMDB04953	LMSP02010009
7	Ceria	Lipidomics	CeO2 NP-C 01h	647.618	2.181	0.0419
8	Ceria	Lipidomics	CeO2 NP-C 01h	675.649	1.919	0.0419
9	Ceria	Lipidomics	CeO2 NP-C 06h	none statistically significant at q<0.05
10	Ceria	Lipidomics	CeO2 NP-C 24h	none statistically significant at q<0.05
11	Ceria	Lipidomics	CeO2 NP-E 01h	none statistically significant at q<0.05
12	Ceria	Lipidomics	CeO2 NP-E 06h	none statistically significant at q<0.05
13	Ceria	Lipidomics	CeO2 NP-E 24h	706.572	3.122	0.000716
14	Ceria	Lipidomics	CeO2 NP-E 24h	705.568	2.757	0.00186	['DG(18:3(9Z,12Z,15Z)/20:0/0:0)[iso2]', 'DG(18:2(9Z,12Z)/20:1(11Z)/0:0)[iso2]', 'DG(18:1(9Z)/20:2(11Z,14Z)/0:0)[iso2]', 'DG(18:0/20:3(8Z,11Z,14Z)/0:0)[iso2]', 'DG(16:0/22:3(10Z,13Z,16Z)/0:0)[iso2]', 'DG(16:1(9Z)/22:2(13Z,16Z)/0:0)[iso2]', 'DG(18:3(6Z,9Z,12Z)/20:0/0:0)[iso2]']	C41H74O5	HMDB07310;HMDB07253;HMDB07225;HMDB07169;HMDB07146;HMDB07281	LMGL02010098;LMGL02010099;LMGL02010100;LMGL02010101;LMGL02010116;LMGL02010137;LMGL02010484
15	Ceria	Lipidomics	CeO2 NP-E 24h	703.552	2.469	0.00571	['DG(18:3(9Z,12Z,15Z)/20:1(11Z)/0:0)[iso2]', 'DG(18:2(9Z,12Z)/20:2(11Z,14Z)/0:0)[iso2]', 'DG(18:1(9Z)/20:3(8Z,11Z,14Z)/0:0)[iso2]', 'DG(18:0/20:4(5Z,8Z,11Z,14Z)/0:0)[iso2]', 'DG(16:1(9Z)/22:3(10Z,13Z,16Z)/0:0)[iso2]', 'DG(16:0/22:4(7Z,10Z,13Z,16Z)/0:0)[iso2]', 'DG(18:3(6Z,9Z,12Z)/20:1(11Z)/0:0)[iso2]', 'DG(18:4(6Z,9Z,12Z,15Z)/20:0/0:0)[iso2]']	C41H72O5	HMDB07311;HMDB07254;HMDB07227;HMDB07170;HMDB07118;HMDB07282;HMDB07339	LMGL02010108;LMGL02010109;LMGL02010110;LMGL02010111;LMGL02010126;LMGL02010138;LMGL02010485;LMGL02010508
16	Ceria	Lipidomics	CeO2 NP-NM212 01h	none statistically significant at q<0.05
17	Ceria	Lipidomics	CeO2 NP-NM212 06h	none statistically significant at q<0.05
18	Ceria	Lipidomics	CeO2 NP-NM212 24h	706.572	2.509	0.00659
19	Ceria	Polar metabolomics	CeO2 NP-A 01h	191.048	6.08	0.0315
20	Ceria	Polar metabolomics	CeO2 NP-A 01h	122.027	3.507	0.0315	['L-Cysteine', 'D-Cysteine']	C3H7NO2S	HMDB00574;HMDB03417
21	Ceria	Polar metabolomics	CeO2 NP-A 06h	273.051	1.534	0.017	['Gamma-Glutamylcysteine']	C8H14N2O5S	HMDB01049
22	Ceria	Polar metabolomics	CeO2 NP-A 24h	287.01	2.317	0.018
23	Ceria	Polar metabolomics	CeO2 NP-A 24h	244.98	1.608	0.00296
24	Ceria	Polar metabolomics	CeO2 NP-A 24h	273.962	1.165	0.0302
25	Ceria	Polar metabolomics	CeO2 NP-C 01h	none statistically significant at q<0.05
26	Ceria	Polar metabolomics	CeO2 NP-C 06h	none statistically significant at q<0.05
27	Ceria	Polar metabolomics	CeO2 NP-C 24h	294.002	2.696	8.6e-07
28	Ceria	Polar metabolomics	CeO2 NP-C 24h	315.984	2.46	0.000362
29	Ceria	Polar metabolomics	CeO2 NP-C 24h	218.114	2.388	0.0416	['N-a-Acetylcitrulline', 'Alanyl-Glutamine', 'Alanyl-Gamma-glutamate', 'Glutaminyl-Alanine', 'Gamma-glutamyl-Alanine']	C8H15N3O4	HMDB00856;HMDB28685;HMDB28701;HMDB28790;HMDB29142
30	Ceria	Polar metabolomics	CeO2 NP-C 24h	266.878	1.286	0.0323
31	Ceria	Polar metabolomics	CeO2 NP-C 24h	419.183	0.323	0.0375	['[6]-Gingerdiol 3,5-diacetate'];[""(3'x,5'a,9'x,10'b)-O-(3-Hydroxy-6-oxo-7-drimen-11-yl)umbelliferone"", ""(S)-(E)-2'-(3,6-Dimethyl-2-heptenyl)-3',4',7-trihydroxyflavanone"", ""(S)-(E)-8-(3,6-Dimethyl-2-heptenyl)-4',5,7-trihydroxyflavanone""]	C21H32O6;C24H28O5	HMDB40568;HMDB39042;HMDB40305;HMDB40312
32	Ceria	Polar metabolomics	CeO2 NP-C 24h	463.303	0.284	0.0185
33	Ceria	Polar metabolomics	CeO2 NP-E 01h	none statistically significant at q<0.05
34	Ceria	Polar metabolomics	CeO2 NP-E 06h	none statistically significant at q<0.05
35	Ceria	Polar metabolomics	CeO2 NP-E 24h	287.01	3.041	0.00126
36	Ceria	Polar metabolomics	CeO2 NP-E 24h	294.002	2.734	8.15e-06
37	Ceria	Polar metabolomics	CeO2 NP-E 24h	315.984	2.564	0.000139
38	Ceria	Polar metabolomics	CeO2 NP-E 24h	285.051	1.614	0.00768
39	Ceria	Polar metabolomics	CeO2 NP-E 24h	285.055	1.614	0.0164
40	Ceria	Polar metabolomics	CeO2 NP-E 24h	269.16	1.586	0.0269	['Histidinyl-Isoleucine', 'Histidinyl-Leucine', 'Isoleucyl-Histidine', 'Leucyl-Histidine']	C12H20N4O3	HMDB28888;HMDB28889;HMDB28909;HMDB28931
41	Ceria	Polar metabolomics	CeO2 NP-E 24h	244.98	1.27	0.0221
42	Ceria	Polar metabolomics	CeO2 NP-E 24h	249.983	1.189	0.00095
43	Ceria	Polar metabolomics	CeO2 NP-E 24h	251.98	1.187	0.00265
44	Ceria	Polar metabolomics	CeO2 NP-E 24h	271.965	1.141	0.00811
45	Ceria	Polar metabolomics	CeO2 NP-E 24h	272.968	1.141	0.00777
46	Ceria	Polar metabolomics	CeO2 NP-E 24h	270.873	0.781	0.0335
47	Ceria	Polar metabolomics	CeO2 NP-NM212 01h	none statistically significant at q<0.05
48	Ceria	Polar metabolomics	CeO2 NP-NM212 06h	none statistically significant at q<0.05
49	Ceria	Polar metabolomics	CeO2 NP-NM212 24h	287.01	2.059	0.0334
50	Ceria	Polar metabolomics	CeO2 NP-NM212 24h	294.002	1.717	0.043
51	Ceria	Polar metabolomics	CeO2 NP-NM212 24h	271.965	1.178	0.0263
52	Ceria	Polar metabolomics	CeO2 NP-NM212 24h	273.962	1.176	0.0263
53	Ceria	Polar metabolomics	CeO2 NP-NM212 24h	89.1073	0.688	0.0263	['Putrescine']	C4H12N2	HMDB01414
54	Ceria	RNAseq	CeO2 NP-A 01h	ENSG00000250771	2.066	0.00155759	RP11-153M7.3 transcribed_unprocessed_pseudogene	RP11-153M7.3
55	Ceria	RNAseq	CeO2 NP-A 01h	ENSG00000241956	2.061	0.00168883	CTC-340A15.2 antisense	CTC-340A15.2
56	Ceria	RNAseq	CeO2 NP-A 01h	ENSG00000214900	2.016	0.0248431	long intergenic non-protein coding RNA 1588	LINC01588
57	Ceria	RNAseq	CeO2 NP-A 01h	ENSG00000101670	1.936	0.012913	lipase G, endothelial type	LIPG
58	Ceria	RNAseq	CeO2 NP-A 01h	ENSG00000172296	1.929	0.00521006	serine palmitoyltransferase long chain base subunit 3	SPTLC3
59	Ceria	RNAseq	CeO2 NP-A 01h	ENSG00000170006	1.843	0.0157529	transmembrane protein 154	TMEM154
60	Ceria	RNAseq	CeO2 NP-A 01h	ENSG00000226026	1.837	0.0157529	RP11-57H12.3 antisense	RP11-57H12.3
61	Ceria	RNAseq	CeO2 NP-A 01h	ENSG00000230612	1.805	0.012913	AC004237.1 antisense	AC004237.1
62	Ceria	RNAseq	CeO2 NP-A 01h	ENSG00000277778	1.793	0.012913	phosphoglucomutase 5 pseudogene 2	PGM5P2
63	Ceria	RNAseq	CeO2 NP-A 01h	ENSG00000206579	1.765	0.041676	XK related 4	XKR4
64	Ceria	RNAseq	CeO2 NP-A 01h	ENSG00000174607	1.754	0.041676	UDP glycosyltransferase 8	UGT8
65	Ceria	RNAseq	CeO2 NP-A 01h	ENSG00000225889	1.718	0.012913	AC074289.1 antisense	AC074289.1
66	Ceria	RNAseq	CeO2 NP-A 01h	ENSG00000229089	1.658	0.041676	ankyrin repeat domain 20 family member A8, pseudogene	ANKRD20A8P
67	Ceria	RNAseq	CeO2 NP-A 01h	ENSG00000154582	1.454	0.041676	transcription elongation factor B subunit 1	TCEB1
68	Ceria	RNAseq	CeO2 NP-A 01h	ENSG00000168453	0.731	0.0248431	hair growth associated	HR
69	Ceria	RNAseq	CeO2 NP-A 01h	ENSG00000266714	0.728	0.0157529	myosin XVB	MYO15B
70	Ceria	RNAseq	CeO2 NP-A 01h	ENSG00000185499	0.512	0.0369449	mucin 1, cell surface associated	MUC1
71	Ceria	RNAseq	CeO2 NP-A 06h	ENSG00000117318	0.425	0.00593	inhibitor of DNA binding 3, HLH protein	ID3
72	Ceria	RNAseq	CeO2 NP-A 06h	ENSG00000115738	0.361	0.00169	inhibitor of DNA binding 2, HLH protein	ID2
73	Ceria	RNAseq	CeO2 NP-A 06h	ENSG00000125968	0.346	0.000101	inhibitor of DNA binding 1, HLH protein	ID1
74	Ceria	RNAseq	CeO2 NP-A 24h	ENSG00000125968	0.463	0.0194	inhibitor of DNA binding 1, HLH protein	ID1
75	Ceria	RNAseq	CeO2 NP-A 24h	ENSG00000115738	0.387	0.0144	inhibitor of DNA binding 2, HLH protein	ID2
76	Ceria	RNAseq	CeO2 NP-C 01h	none statistically significant at q<0.05
77	Ceria	RNAseq	CeO2 NP-C 06h	ENSG00000117318	0.406	0.000468	inhibitor of DNA binding 3, HLH protein	ID3
78	Ceria	RNAseq	CeO2 NP-C 06h	ENSG00000115738	0.347	0.000423	inhibitor of DNA binding 2, HLH protein	ID2
79	Ceria	RNAseq	CeO2 NP-C 06h	ENSG00000125968	0.282	2.45e-08	inhibitor of DNA binding 1, HLH protein	ID1
80	Ceria	RNAseq	CeO2 NP-C 06h	ENSG00000172201	0.011	0.0202	inhibitor of DNA binding 4, HLH protein	ID4
81	Ceria	RNAseq	CeO2 NP-C 24h	ENSG00000186480	1.419	0.0369	insulin induced gene 1	INSIG1
82	Ceria	RNAseq	CeO2 NP-E 01h	none statistically significant at q<0.05
83	Ceria	RNAseq	CeO2 NP-E 06h	ENSG00000117318	0.391	0.00014	inhibitor of DNA binding 3, HLH protein	ID3
84	Ceria	RNAseq	CeO2 NP-E 06h	ENSG00000115738	0.304	1.68e-05	inhibitor of DNA binding 2, HLH protein	ID2
85	Ceria	RNAseq	CeO2 NP-E 06h	ENSG00000125968	0.285	6.87e-08	inhibitor of DNA binding 1, HLH protein	ID1
86	Ceria	RNAseq	CeO2 NP-E 24h	ENSG00000117318	0.524	0.00765	inhibitor of DNA binding 3, HLH protein	ID3
87	Ceria	RNAseq	CeO2 NP-E 24h	ENSG00000125968	0.463	0.00162	inhibitor of DNA binding 1, HLH protein	ID1
88	Ceria	RNAseq	CeO2 NP-E 24h	ENSG00000115738	0.395	0.00162	inhibitor of DNA binding 2, HLH protein	ID2
89	Ceria	RNAseq	CeO2 NP-E 24h	ENSG00000172201	0.0776	0.00175	inhibitor of DNA binding 4, HLH protein	ID4
90	Ceria	RNAseq	CeO2 NP-NM212 01h	ENSG00000171557	1.612	0.027558	fibrinogen gamma chain	FGG
91	Ceria	RNAseq	CeO2 NP-NM212 01h	ENSG00000105321	0.522	0.027558	coiled-coil domain containing 9	CCDC9
92	Ceria	RNAseq	CeO2 NP-NM212 06h	ENSG00000077150	1.904	0.0271	nuclear factor kappa B subunit 2	NFKB2
93	Ceria	RNAseq	CeO2 NP-NM212 24h	ENSG00000146678	2.558	3.61039e-07	insulin like growth factor binding protein 1	IGFBP1
94	Ceria	RNAseq	CeO2 NP-NM212 24h	ENSG00000166523	2.019	0.0117269	C-type lectin domain family 4 member E	CLEC4E
95	Ceria	RNAseq	CeO2 NP-NM212 24h	ENSG00000047457	1.927	0.000248525	ceruloplasmin	CP
96	Ceria	RNAseq	CeO2 NP-NM212 24h	ENSG00000226752	1.881	0.0284916	PSMD5 antisense RNA 1 (head to head)	PSMD5-AS1
97	Ceria	RNAseq	CeO2 NP-NM212 24h	ENSG00000131781	1.823	0.0493222	flavin containing monooxygenase 5	FMO5
98	Ceria	RNAseq	CeO2 NP-NM212 24h	ENSG00000159167	1.802	0.000531039	stanniocalcin 1	STC1
99	Ceria	RNAseq	CeO2 NP-NM212 24h	ENSG00000169429	1.776	0.00365048	C-X-C motif chemokine ligand 8	CXCL8
100	Ceria	RNAseq	CeO2 NP-NM212 24h	ENSG00000124224	1.775	0.0493222	protein phosphatase 4 regulatory subunit 1 like (pseudogene)	PPP4R1L
101	Ceria	RNAseq	CeO2 NP-NM212 24h	ENSG00000146674	1.753	5.73462e-08	insulin like growth factor binding protein 3	IGFBP3
102	Ceria	RNAseq	CeO2 NP-NM212 24h	ENSG00000163818	1.672	0.0345012	leucine zipper transcription factor like 1	LZTFL1
103	Ceria	RNAseq	CeO2 NP-NM212 24h	ENSG00000165895	1.658	0.040857	Rho GTPase activating protein 42	ARHGAP42
104	Ceria	RNAseq	CeO2 NP-NM212 24h	ENSG00000103534	1.643	0.048104	transmembrane channel like 5	TMC5
105	Ceria	RNAseq	CeO2 NP-NM212 24h	ENSG00000151229	1.61	0.0136198	solute carrier family 2 member 13	SLC2A13
106	Ceria	RNAseq	CeO2 NP-NM212 24h	ENSG00000164300	1.598	0.0284916	serine incorporator 5	SERINC5
107	Ceria	RNAseq	CeO2 NP-NM212 24h	ENSG00000137145	1.592	0.0300164	DENN domain containing 4C	DENND4C
108	Ceria	RNAseq	CeO2 NP-NM212 24h	ENSG00000003436	1.58	0.0284916	tissue factor pathway inhibitor	TFPI
109	Ceria	RNAseq	CeO2 NP-NM212 24h	ENSG00000023445	1.574	0.00518229	baculoviral IAP repeat containing 3	BIRC3
110	Ceria	RNAseq	CeO2 NP-NM212 24h	ENSG00000119922	1.569	0.00518229	interferon induced protein with tetratricopeptide repeats 2	IFIT2
111	Ceria	RNAseq	CeO2 NP-NM212 24h	ENSG00000147872	1.567	0.000531039	perilipin 2	PLIN2
112	Ceria	RNAseq	CeO2 NP-NM212 24h	ENSG00000184985	1.567	0.048104	sortilin related VPS10 domain containing receptor 2	SORCS2
113	Ceria	RNAseq	CeO2 NP-NM212 24h	ENSG00000126870	1.518	0.0372622	WD repeat domain 60	WDR60
114	Ceria	RNAseq	CeO2 NP-NM212 24h	ENSG00000116285	1.517	1.51801e-05	ERBB receptor feedback inhibitor 1	ERRFI1
115	Ceria	RNAseq	CeO2 NP-NM212 24h	ENSG00000243649	1.516	0.0449893	complement factor B	CFB
116	Ceria	RNAseq	CeO2 NP-NM212 24h	ENSG00000140479	1.486	0.00753184	proprotein convertase subtilisin/kexin type 6	PCSK6
117	Ceria	RNAseq	CeO2 NP-NM212 24h	ENSG00000073756	1.462	0.0284916	prostaglandin-endoperoxide synthase 2	PTGS2
118	Ceria	RNAseq	CeO2 NP-NM212 24h	ENSG00000104419	1.442	0.0342147	N-myc downstream regulated 1	NDRG1
119	Ceria	RNAseq	CeO2 NP-NM212 24h	ENSG00000198682	1.414	0.038062	3'-phosphoadenosine 5'-phosphosulfate synthase 2	PAPSS2
120	Ceria	RNAseq	CeO2 NP-NM212 24h	ENSG00000182326	1.404	0.000274526	complement C1s	C1S
121	Ceria	RNAseq	CeO2 NP-NM212 24h	ENSG00000170017	1.392	0.0327489	activated leukocyte cell adhesion molecule	ALCAM
122	Ceria	RNAseq	CeO2 NP-NM212 24h	ENSG00000104765	1.313	0.048104	BCL2 interacting protein 3 like	BNIP3L
123	Ceria	RNAseq	CeO2 NP-NM212 24h	ENSG00000163735	1.28	0.0459851	C-X-C motif chemokine ligand 5	CXCL5
124	Ceria	RNAseq	CeO2 NP-NM212 24h	ENSG00000130414	0.789	0.0493222	NADH:ubiquinone oxidoreductase subunit A10	NDUFA10
125	Ceria	RNAseq	CeO2 NP-NM212 24h	ENSG00000123358	0.702	0.0345012	nuclear receptor subfamily 4 group A member 1	NR4A1
126	Ceria	RNAseq	CeO2 NP-NM212 24h	ENSG00000126456	0.687	0.0468462	interferon regulatory factor 3	IRF3
127	Ceria	RNAseq	CeO2 NP-NM212 24h	ENSG00000197903	0.599	0.0354003	histone cluster 1 H2B family member k	HIST1H2BK
128	Ceria	RNAseq	CeO2 NP-NM212 24h	ENSG00000187634	0.595	0.0347713	sterile alpha motif domain containing 11	SAMD11
129	Ceria	RNAseq	CeO2 NP-NM212 24h	ENSG00000129353	0.566	0.0284916	solute carrier family 44 member 2	SLC44A2
130	Silver	Lipidomics	Ag NP-NM300K 01h	694.394	8.869	0.0466
131	Silver	Lipidomics	Ag NP-NM300K 01h	537.27	6.902	0.000321
132	Silver	Lipidomics	Ag NP-NM300K 01h	474.264	3.229	0.000321
133	Silver	Lipidomics	Ag NP-NM300K 01h	359.166	2.674	0.00115
134	Silver	Lipidomics	Ag NP-NM300K 01h	384.125	1.658	0.0433
135	Silver	Lipidomics	Ag NP-NM300K 01h	337.001	1.243	0.0371
136	Silver	Lipidomics	Ag NP-NM300K 06h	none statistically significant at q<0.05
137	Silver	Lipidomics	Ag NP-NM300K 24h	546.449	2.12	0.00843
138	Silver	Lipidomics	Ag NP-NM300K 24h	241.022	2.061	0.00843
139	Silver	Lipidomics	Ag MP 01h	none statistically significant at q<0.05
140	Silver	Lipidomics	Ag MP 06h	none statistically significant at q<0.05
141	Silver	Lipidomics	Ag MP 24h	none statistically significant at q<0.05
142	Silver	Lipidomics	Ag+ 01h	464.354	15.32	0.0033
143	Silver	Lipidomics	Ag+ 06h	586.533	2.706	0.039	['Cer(m18:0/18:0)']	C36H73NO2		LMSP00000018
144	Silver	Lipidomics	Ag+ 24h	355.264	2.441	0.038	['NA', 'tetracosahexaenoic acid', 'THA', '(1S)-1-hydroxy-23,24-didehydro-25,26,27-trinorcalciol', 'chola-4,6-dien-24-oic acid']	C24H36O2	HMDB02007	LMFA01030186;LMFA01030804;LMFA01030822;LMFA01030924;LMST03020688;LMST04010326;LMST04010328;LMST04010388;LMST04010442
145	Silver	Lipidomics	Ag+ 24h	356.268	2.432	0.0244
146	Silver	Polar metabolomics	Ag NP-NM300K 01h	419.277	10.81	0.0359
147	Silver	Polar metabolomics	Ag NP-NM300K 01h	319.136	7.825	0.00171
148	Silver	Polar metabolomics	Ag NP-NM300K 01h	326.238	4.174	0.0297
149	Silver	Polar metabolomics	Ag NP-NM300K 01h	325.235	4.06	0.0314	['MG(0:0/14:0/0:0)', 'MG(14:0/0:0/0:0)']	C17H34O4	HMDB11530;HMDB11561
150	Silver	Polar metabolomics	Ag NP-NM300K 01h	279.039	3.461	0.0486
151	Silver	Polar metabolomics	Ag NP-NM300K 01h	331.188	3.24	0.0417	['Methylgingerol', 'Diplodiatoxin', 'Corchorifatty acid A', 'Corchorifatty acid D', 'Dihydrocapsiate', '5-O-Methylembelin']	C18H28O4	HMDB29852;HMDB31471;HMDB32664;HMDB33243;HMDB34781;HMDB40867
152	Silver	Polar metabolomics	Ag NP-NM300K 01h	399.144	2.617	0.00288	['Dulxanthone E', ""5'-Methoxycurcumin""]	C22H22O7	HMDB34030;HMDB38921
153	Silver	Polar metabolomics	Ag NP-NM300K 01h	368.285	2.537	0.0421
154	Silver	Polar metabolomics	Ag NP-NM300K 01h	484.361	2.515	0.0108
155	Silver	Polar metabolomics	Ag NP-NM300K 01h	339.251	2.238	0.0363	['MG(0:0/15:0/0:0)', 'MG(15:0/0:0/0:0)', '(+)-15,16-Dihydroxyoctadecanoic acid', '(9S,10S)-9,10-dihydroxyoctadecanoate']	C18H36O4	HMDB11532;HMDB11563;HMDB31008;HMDB59633
156	Silver	Polar metabolomics	Ag NP-NM300K 01h	340.254	2.222	0.0359
157	Silver	Polar metabolomics	Ag NP-NM300K 01h	528.072	2.126	0.00102
158	Silver	Polar metabolomics	Ag NP-NM300K 01h	463.383	2.106	0.0177
159	Silver	Polar metabolomics	Ag NP-NM300K 01h	427.199	2.047	0.0268
160	Silver	Polar metabolomics	Ag NP-NM300K 01h	490.41	2.038	0.0293
161	Silver	Polar metabolomics	Ag NP-NM300K 01h	451.243	2.032	0.0477	[""5,8-Epoxy-5,8-dihydro-10'-apo-b,y-carotene-3,10'-diol"", ""5,6-Epoxy-5,6-dihydro-10'-apo-b,y-carotene-3,10'-diol""]	C27H38O3	HMDB39020;HMDB39021
162	Silver	Polar metabolomics	Ag NP-NM300K 01h	429.196	2.029	0.0261
163	Silver	Polar metabolomics	Ag NP-NM300K 01h	491.413	2.012	0.0284
164	Silver	Polar metabolomics	Ag NP-NM300K 01h	269.172	2.007	0.0364
165	Silver	Polar metabolomics	Ag NP-NM300K 01h	485.157	1.989	0.0314	['Estrone glucuronide', 'Cubebininolide', ""5'-O-Methylmelledonal""]	C24H30O8	HMDB04483;HMDB32728;HMDB35859	LMST05010011;
166	Silver	Polar metabolomics	Ag NP-NM300K 01h	317.172	1.985	0.0295	['Gingerol', 'Nordihydrocapsiate', 'Tanacetol A', 'Phytuberin', 'Myrsinone']	C17H26O4	HMDB05783;HMDB34779;HMDB35722;HMDB35754;HMDB40646
167	Silver	Polar metabolomics	Ag NP-NM300K 01h	371.238	1.963	0.0381	['MG(0:0/16:0/0:0)', 'MG(16:0/0:0/0:0)', 'Glycerol 1-hexadecanoate']	C19H38O4	HMDB11533;HMDB11564;HMDB31074	LMGL01010025;LMGL01010009;
168	Silver	Polar metabolomics	Ag NP-NM300K 01h	395.313	1.949	0.0497
169	Silver	Polar metabolomics	Ag NP-NM300K 01h	205.126	1.942	0.000328
170	Silver	Polar metabolomics	Ag NP-NM300K 01h	204.123	1.894	0.000279	['L-Acetylcarnitine']	C9H17NO4	HMDB00201
171	Silver	Polar metabolomics	Ag NP-NM300K 01h	245.012	1.858	0.00905
172	Silver	Polar metabolomics	Ag NP-NM300K 01h	384.002	1.852	0.014
173	Silver	Polar metabolomics	Ag NP-NM300K 01h	308.916	1.836	0.00113
174	Silver	Polar metabolomics	Ag NP-NM300K 01h	405.985	1.825	0.00824
175	Silver	Polar metabolomics	Ag NP-NM300K 01h	192.999	1.789	0.00157
176	Silver	Polar metabolomics	Ag NP-NM300K 01h	165.988	1.774	0.00303
177	Silver	Polar metabolomics	Ag NP-NM300K 01h	285.946	1.766	0.00427
178	Silver	Polar metabolomics	Ag NP-NM300K 01h	297.203	1.758	0.0256
179	Silver	Polar metabolomics	Ag NP-NM300K 01h	367.245	1.755	0.0308
180	Silver	Polar metabolomics	Ag NP-NM300K 01h	243.053	1.729	0.00147	['L-Tryptophan', 'D-Tryptophan', '3-Hydroxymethylantipyrine', 'Ethotoin', 'Nirvanol', '4-Hydroxyantipyrine', 'S-nirvanol']	C11H12N2O2	HMDB00929;HMDB13609;HMDB13840;HMDB14892;HMDB60533;HMDB60878;HMDB60967
181	Silver	Polar metabolomics	Ag NP-NM300K 01h	283.902	1.729	0.00104
182	Silver	Polar metabolomics	Ag NP-NM300K 01h	489.199	1.721	0.0484
183	Silver	Polar metabolomics	Ag NP-NM300K 01h	421.254	1.717	0.0499	['MG(0:0/20:3(11Z,14Z,17Z)/0:0)', 'MG(0:0/20:3(5Z,8Z,11Z)/0:0)', 'MG(0:0/20:3(8Z,11Z,14Z)/0:0)', 'MG(20:3(11Z,14Z,17Z)/0:0/0:0)', 'MG(20:3(5Z,8Z,11Z)/0:0/0:0)', 'MG(20:3(8Z,11Z,14Z)/0:0/0:0)', 'Isopersin', '2-Hydroxy-4-oxo-5,12-heneicosadien-1-yl acetate', 'Persin']	C23H40O4	HMDB11545;HMDB11546;HMDB11547;HMDB11575;HMDB11576;HMDB11577;HMDB32735;HMDB39403;HMDB41103
184	Silver	Polar metabolomics	Ag NP-NM300K 01h	366.874	1.705	0.00102
185	Silver	Polar metabolomics	Ag NP-NM300K 01h	481.209	1.696	0.0498
186	Silver	Polar metabolomics	Ag NP-NM300K 01h	281.905	1.695	0.00339
187	Silver	Polar metabolomics	Ag NP-NM300K 01h	463.944	1.694	0.00983
188	Silver	Polar metabolomics	Ag NP-NM300K 01h	250.957	1.692	0.00157
189	Silver	Polar metabolomics	Ag NP-NM300K 01h	222.127	1.68	0.0461
190	Silver	Polar metabolomics	Ag NP-NM300K 01h	242.019	1.679	0.0018
191	Silver	Polar metabolomics	Ag NP-NM300K 01h	430.2	1.677	0.0429
192	Silver	Polar metabolomics	Ag NP-NM300K 01h	221.131	1.673	0.0314
193	Silver	Polar metabolomics	Ag NP-NM300K 01h	370.916	1.658	0.00437
194	Silver	Polar metabolomics	Ag NP-NM300K 01h	134.064	1.655	0.00829
195	Silver	Polar metabolomics	Ag NP-NM300K 01h	180.003	1.654	0.00157
196	Silver	Polar metabolomics	Ag NP-NM300K 01h	192.003	1.652	0.00178	['2-Amino-3-phosphonopropionic acid']	C3H8NO5P	HMDB00370
197	Silver	Polar metabolomics	Ag NP-NM300K 01h	492.417	1.632	0.036
198	Silver	Polar metabolomics	Ag NP-NM300K 01h	318.069	1.63	0.0183
199	Silver	Polar metabolomics	Ag NP-NM300K 01h	305.024	1.621	0.0192
200	Silver	Polar metabolomics	Ag NP-NM300K 01h	204.042	1.619	0.00104	['L-Phenylalanine', '3-Pyridinebutanoic acid', 'Benzocaine', 'Norsalsolinol', 'Gentiatibetine', 'Ethyl 2-aminobenzoate', 'Methyl N-methylanthranilate', 'Benzyl glycinate']	C9H11NO2	HMDB00159;HMDB01007;HMDB04992;HMDB06044;HMDB33485;HMDB33589;HMDB34169;HMDB59934
201	Silver	Polar metabolomics	Ag NP-NM300K 01h	244.053	1.619	0.00238
202	Silver	Polar metabolomics	Ag NP-NM300K 01h	226.024	1.618	0.00369
203	Silver	Polar metabolomics	Ag NP-NM300K 01h	249.089	1.606	0.0451	['Jasmonic acid', 'Sedanonic acid', 'Dihydro-3-(2-octenyl)-2,5-furandione', '(R)-8-Acetoxycarvotanacetone', '1-Benzyloxy-1-(2-methoxyethoxy)ethane', '4-(Butoxymethyl)-2-methoxyphenol', 'Isoamyl 2-furonpropionate', 'Dihydro-3-(1-octenyl)-2,5-furandione', '3-Ethenyl-2,5-dimethyl-4-oxohex-5-en-2-yl acetate'];['Phenylmethyl benzeneacetate', '2-Phenylethyl benzoate', 'p-Tolyl phenylacetate']	C12H18O3;C15H14O2	HMDB32797;HMDB32871;HMDB33102;HMDB37104;HMDB37135;HMDB37642;HMDB37735;HMDB37816;HMDB41573;HMDB33251;HMDB33946;HMDB41564
204	Silver	Polar metabolomics	Ag NP-NM300K 01h	220.037	1.599	0.00203	['L-Tyrosine', '4-Hydroxy-4-(3-pyridyl)-butanoic acid', 'L-Threo-3-Phenylserine', 'Beta-Tyrosine', 'o-Tyrosine', 'Meta-Tyrosine', '4,6,7-Trihydroxy-1,2,3,4-tetrahydroisoquinoline']	C9H11NO3	HMDB00158;HMDB01119;HMDB02184;HMDB03831;HMDB06050;HMDB59720;HMDB60280
205	Silver	Polar metabolomics	Ag NP-NM300K 01h	309.954	1.589	0.00157
206	Silver	Polar metabolomics	Ag NP-NM300K 01h	176.008	1.582	0.0123
207	Silver	Polar metabolomics	Ag NP-NM300K 01h	317.985	1.575	0.0145
208	Silver	Polar metabolomics	Ag NP-NM300K 01h	178.028	1.564	0.00437
209	Silver	Polar metabolomics	Ag NP-NM300K 01h	171.017	1.562	0.00907	['Ureidopropionic acid', 'L-Asparagine', 'Glycyl-glycine', 'N-Carbamoylsarcosine', 'D-Asparagine']	C4H8N2O3	HMDB00026;HMDB00168;HMDB11733;HMDB12265;HMDB33780
210	Silver	Polar metabolomics	Ag NP-NM300K 01h	535.122	1.558	0.0199	['Musabalbisiane A', ""(R)-Isobyakangelicin 3'-glucoside"", ""(R)-Byakangelicin 3'-glucoside"", ""(R)-Byakangelicin 2'-glucoside"", 'Mycophenolic acid O-acyl-glucuronide', 'Mycophenolic acid glucuronide']	C23H28O12	HMDB38680;HMDB39026;HMDB39069;HMDB39070;HMDB60491;HMDB60634
211	Silver	Polar metabolomics	Ag NP-NM300K 01h	188.07	1.541	0.00636	['Indoleacrylic acid']	C11H9NO2	HMDB00734
212	Silver	Polar metabolomics	Ag NP-NM300K 01h	104.053	1.538	0.0036
213	Silver	Polar metabolomics	Ag NP-NM300K 01h	138.068	1.538	0.0167	['Cyclohexylamine', '2-Methylpiperidine']	C6H13N	HMDB31404;HMDB32416
214	Silver	Polar metabolomics	Ag NP-NM300K 01h	236.98	1.537	0.00102
215	Silver	Polar metabolomics	Ag NP-NM300K 01h	177.025	1.535	0.00113	['N-Methylnicotinamide', '2-Acetyl-3-methylpyrazine', '2-Aminobenzamide', '4-Acetyl-2-methylpyrimidine', '2-Methylnicotinamide']	C7H8N2O	HMDB03152;HMDB30001;HMDB33947;HMDB37819;HMDB59711
216	Silver	Polar metabolomics	Ag NP-NM300K 01h	158.022	1.528	0.00427	['L-Threonine', 'L-Homoserine', 'L-Allothreonine', 'Hydroxyethyl glycine', '4-Amino-3-hydroxybutyrate'];['2-Benzoxazolol']	C4H9NO3;C7H5NO2	HMDB00167;HMDB00719;HMDB04041;HMDB61148;HMDB61877;HMDB32931
217	Silver	Polar metabolomics	Ag NP-NM300K 01h	133.032	1.523	0.00797	['3-Methyl sulfolene']	C5H8O2S	HMDB59667
218	Silver	Polar metabolomics	Ag NP-NM300K 01h	138.074	1.522	0.0191
219	Silver	Polar metabolomics	Ag NP-NM300K 01h	371.954	1.521	0.0155
220	Silver	Polar metabolomics	Ag NP-NM300K 01h	156.046	1.52	0.00163
221	Silver	Polar metabolomics	Ag NP-NM300K 01h	299.977	1.52	0.00102
222	Silver	Polar metabolomics	Ag NP-NM300K 01h	133.061	1.512	0.0131	['Ureidopropionic acid', 'L-Asparagine', 'Glycyl-glycine', 'N-Carbamoylsarcosine', 'D-Asparagine']	C4H8N2O3	HMDB00026;HMDB00168;HMDB11733;HMDB12265;HMDB33780
223	Silver	Polar metabolomics	Ag NP-NM300K 01h	251.894	1.51	0.00163
224	Silver	Polar metabolomics	Ag NP-NM300K 01h	291.954	1.51	0.00113
225	Silver	Polar metabolomics	Ag NP-NM300K 01h	320.079	1.506	0.0337	[""5'-Methylthioadenosine""]	C11H15N5O3S	HMDB01173
226	Silver	Polar metabolomics	Ag NP-NM300K 01h	267.928	1.504	0.000328
227	Silver	Polar metabolomics	Ag NP-NM300K 01h	367.912	1.504	0.00175
228	Silver	Polar metabolomics	Ag NP-NM300K 01h	293.879	1.503	0.00457
229	Silver	Polar metabolomics	Ag NP-NM300K 01h	350.901	1.501	0.00302
230	Silver	Polar metabolomics	Ag NP-NM300K 01h	438.741	1.501	0.0402
231	Silver	Polar metabolomics	Ag NP-NM300K 01h	292.942	1.499	0.00137
232	Silver	Polar metabolomics	Ag NP-NM300K 01h	296.983	1.499	0.00104
233	Silver	Polar metabolomics	Ag NP-NM300K 01h	156.077	1.498	0.00288	['L-Histidine', 'L-2-Amino-3-(1-pyrazolyl)propanoic acid']	C6H9N3O2	HMDB00177;HMDB34267
234	Silver	Polar metabolomics	Ag NP-NM300K 01h	289.975	1.495	0.0059
235	Silver	Polar metabolomics	Ag NP-NM300K 01h	155.043	1.492	0.00163	['Ureidopropionic acid', 'L-Asparagine', 'Glycyl-glycine', 'N-Carbamoylsarcosine', 'D-Asparagine']	C4H8N2O3	HMDB00026;HMDB00168;HMDB11733;HMDB12265;HMDB33780
236	Silver	Polar metabolomics	Ag NP-NM300K 01h	234.983	1.491	0.00102
237	Silver	Polar metabolomics	Ag NP-NM300K 01h	137.071	1.489	0.0191	['N-Methylnicotinamide', '2-Acetyl-3-methylpyrazine', '2-Aminobenzamide', '4-Acetyl-2-methylpyrimidine', '2-Methylnicotinamide']	C7H8N2O	HMDB03152;HMDB30001;HMDB33947;HMDB37819;HMDB59711
238	Silver	Polar metabolomics	Ag NP-NM300K 01h	318.965	1.488	0.00781
239	Silver	Polar metabolomics	Ag NP-NM300K 01h	279.001	1.486	0.00793
240	Silver	Polar metabolomics	Ag NP-NM300K 01h	477.07	1.486	0.0477	['Silica aerogel']	C23H22N2O3S2	HMDB32503
241	Silver	Polar metabolomics	Ag NP-NM300K 01h	310.913	1.485	0.0358
242	Silver	Polar metabolomics	Ag NP-NM300K 01h	443.849	1.481	0.0186
243	Silver	Polar metabolomics	Ag NP-NM300K 01h	121.084	1.479	0.00518
244	Silver	Polar metabolomics	Ag NP-NM300K 01h	301.975	1.477	0.00283
245	Silver	Polar metabolomics	Ag NP-NM300K 01h	283.988	1.474	0.00949
246	Silver	Polar metabolomics	Ag NP-NM300K 01h	318.007	1.468	0.0176
247	Silver	Polar metabolomics	Ag NP-NM300K 01h	205.097	1.467	0.00396	['L-Tryptophan', 'D-Tryptophan', '3-Hydroxymethylantipyrine', 'Ethotoin', 'Nirvanol', '4-Hydroxyantipyrine', 'S-nirvanol']	C11H12N2O2	HMDB00929;HMDB13609;HMDB13840;HMDB14892;HMDB60533;HMDB60878;HMDB60967
248	Silver	Polar metabolomics	Ag NP-NM300K 01h	270.978	1.467	0.0321
249	Silver	Polar metabolomics	Ag NP-NM300K 01h	276.923	1.466	0.00483
250	Silver	Polar metabolomics	Ag NP-NM300K 01h	133.099	1.465	0.000746	['1,3-Octadiene', '2-(Methylenebutyl)-cyclopropane', '2,4-Octadiene', 'Dimethylhexa-1,4-diene', '2,5-Dimethyl-2,4-hexadiene']	C8H14	HMDB40966;HMDB61899;HMDB61900;HMDB61901;HMDB61902
251	Silver	Polar metabolomics	Ag NP-NM300K 01h	200.041	1.46	0.00102
252	Silver	Polar metabolomics	Ag NP-NM300K 01h	150.058	1.459	0.00824	['L-Methionine', 'Penicillamine', 'Racemethionine']	C5H11NO2S	HMDB00696;HMDB14997;HMDB33951
253	Silver	Polar metabolomics	Ag NP-NM300K 01h	348.045	1.459	0.0425	['Glutathione']	C10H17N3O6S	HMDB00125
254	Silver	Polar metabolomics	Ag NP-NM300K 01h	120.003	1.458	0.0057
255	Silver	Polar metabolomics	Ag NP-NM300K 01h	319.999	1.458	0.00677
256	Silver	Polar metabolomics	Ag NP-NM300K 01h	329.928	1.458	0.00427
257	Silver	Polar metabolomics	Ag NP-NM300K 01h	110.071	1.456	0.0183
258	Silver	Polar metabolomics	Ag NP-NM300K 01h	390.011	1.455	0.0108
259	Silver	Polar metabolomics	Ag NP-NM300K 01h	223.985	1.454	0.00236
260	Silver	Polar metabolomics	Ag NP-NM300K 01h	166.086	1.452	0.00339	['L-Phenylalanine', '3-Pyridinebutanoic acid', 'Benzocaine', 'Norsalsolinol', 'Gentiatibetine', 'Ethyl 2-aminobenzoate', 'Methyl N-methylanthranilate', 'Benzyl glycinate']	C9H11NO2	HMDB00159;HMDB01007;HMDB04992;HMDB06044;HMDB33485;HMDB33589;HMDB34169;HMDB59934
261	Silver	Polar metabolomics	Ag NP-NM300K 01h	167.09	1.45	0.00419
262	Silver	Polar metabolomics	Ag NP-NM300K 01h	178.059	1.45	0.00128	['L-Histidine', 'L-2-Amino-3-(1-pyrazolyl)propanoic acid']	C6H9N3O2	HMDB00177;HMDB34267
263	Silver	Polar metabolomics	Ag NP-NM300K 01h	265.931	1.447	0.00113
264	Silver	Polar metabolomics	Ag NP-NM300K 01h	346.047	1.446	0.0236	['Glutathione'];['Hallacridone', 'Aristolodione']	C10H17N3O6S;C18H13NO4	HMDB00125;HMDB29826;HMDB33247
265	Silver	Polar metabolomics	Ag NP-NM300K 01h	151.062	1.445	0.0165	['7-Methylhypoxanthine', '1-Methylhypoxanthine ']	C6H6N4O	HMDB03162;HMDB13141
266	Silver	Polar metabolomics	Ag NP-NM300K 01h	87.0997	1.444	0.00122
267	Silver	Polar metabolomics	Ag NP-NM300K 01h	134.109	1.442	0.00167
268	Silver	Polar metabolomics	Ag NP-NM300K 01h	150.014	1.441	0.00167	['4-Aminophenol', '2-Acetylpyrrole', '1-Methyl-2-pyrrolecarboxaldehyde']	C6H7NO	HMDB01169;HMDB35882;HMDB40582
269	Silver	Polar metabolomics	Ag NP-NM300K 01h	177.069	1.441	0.00734
270	Silver	Polar metabolomics	Ag NP-NM300K 01h	133.069	1.44	0.0281
271	Silver	Polar metabolomics	Ag NP-NM300K 01h	237.918	1.438	0.0123
272	Silver	Polar metabolomics	Ag NP-NM300K 01h	311.998	1.438	0.00758
273	Silver	Polar metabolomics	Ag NP-NM300K 01h	152.054	1.436	0.0103
274	Silver	Polar metabolomics	Ag NP-NM300K 01h	164.03	1.435	0.00203	['p-Anisidine', '2-Propionylpyrrole', '4-Hydroxybenzylamine', '1-Ethyl-1H-pyrrole-2-carboxaldehyde', '2-Acetyl-1-methylpyrrole']	C7H9NO	HMDB29300;HMDB32492;HMDB32578;HMDB36058;HMDB40360
275	Silver	Polar metabolomics	Ag NP-NM300K 01h	347.05	1.433	0.0233	['gamma-Glutamyl-S-(1-propenyl)cysteine sulfoxide'];['2,3-Dihydro-2,3-dihydroxy-4-(4-hydroxyphenyl)-1H-phenalen-1-one', 'Musanolone C', 'Dehydrowarfarin']	C11H18N2O6S;C19H14O4	HMDB31870;HMDB32848;HMDB37111;HMDB60575
276	Silver	Polar metabolomics	Ag NP-NM300K 01h	427.916	1.433	0.00427
277	Silver	Polar metabolomics	Ag NP-NM300K 01h	447.97	1.433	0.0117
278	Silver	Polar metabolomics	Ag NP-NM300K 01h	133.105	1.43	0.00427
279	Silver	Polar metabolomics	Ag NP-NM300K 01h	207.972	1.428	0.000784
280	Silver	Polar metabolomics	Ag NP-NM300K 01h	160.035	1.427	0.0206
281	Silver	Polar metabolomics	Ag NP-NM300K 01h	226.105	1.42	0.0102	['L-Acetylcarnitine']	C9H17NO4	HMDB00201
282	Silver	Polar metabolomics	Ag NP-NM300K 01h	177.962	1.419	0.0104
283	Silver	Polar metabolomics	Ag NP-NM300K 01h	307.02	1.419	0.00113
284	Silver	Polar metabolomics	Ag NP-NM300K 01h	227.079	1.418	0.015	['N6-Acetyl-L-lysine', 'N-Alpha-acetyllysine', 'Glycyl-L-leucine', 'Alanyl-Valine', 'Glycyl-Isoleucine', 'Isoleucyl-Glycine', 'Leucyl-Glycine', 'Valyl-Alanine'];['L-Tryptophan', 'D-Tryptophan', '3-Hydroxymethylantipyrine', 'Ethotoin', 'Nirvanol', '4-Hydroxyantipyrine', 'S-nirvanol']	C8H16N2O3;C11H12N2O2	HMDB00206;HMDB00446;HMDB00759;HMDB28700;HMDB28844;HMDB28907;HMDB28929;HMDB29120;HMDB00929;HMDB13609;HMDB13840;HMDB14892;HMDB60533;HMDB60878;HMDB60967
285	Silver	Polar metabolomics	Ag NP-NM300K 01h	256.98	1.418	0.0107
286	Silver	Polar metabolomics	Ag NP-NM300K 01h	269.972	1.418	0.00438
287	Silver	Polar metabolomics	Ag NP-NM300K 01h	209.996	1.417	0.0212
288	Silver	Polar metabolomics	Ag NP-NM300K 01h	323.89	1.413	0.00102
289	Silver	Polar metabolomics	Ag NP-NM300K 01h	121.069	1.41	0.0155
290	Silver	Polar metabolomics	Ag NP-NM300K 01h	327.931	1.41	0.00358
291	Silver	Polar metabolomics	Ag NP-NM300K 01h	150.977	1.409	0.0131
292	Silver	Polar metabolomics	Ag NP-NM300K 01h	237.105	1.408	0.0292
293	Silver	Polar metabolomics	Ag NP-NM300K 01h	274.99	1.408	0.0256	['Cyclobrassinin']	C11H10N2S2	HMDB33352
294	Silver	Polar metabolomics	Ag NP-NM300K 01h	226.045	1.407	0.00362	['4-Hydroxydiphenylamine', '2-(1-Naphthyl)acetamide']	C12H11NO	HMDB32597;HMDB32710
295	Silver	Polar metabolomics	Ag NP-NM300K 01h	487.988	1.407	0.0152
296	Silver	Polar metabolomics	Ag NP-NM300K 01h	369.957	1.406	0.00781
297	Silver	Polar metabolomics	Ag NP-NM300K 01h	182.081	1.403	0.01	['L-Tyrosine', '4-Hydroxy-4-(3-pyridyl)-butanoic acid', 'L-Threo-3-Phenylserine', 'Beta-Tyrosine', 'o-Tyrosine', 'Meta-Tyrosine', '4,6,7-Trihydroxy-1,2,3,4-tetrahydroisoquinoline']	C9H11NO3	HMDB00158;HMDB01119;HMDB02184;HMDB03831;HMDB06050;HMDB59720;HMDB60280
298	Silver	Polar metabolomics	Ag NP-NM300K 01h	266.894	1.397	0.00824
299	Silver	Polar metabolomics	Ag NP-NM300K 01h	369.032	1.397	0.0152	['Orotidylic acid']	C10H13N2O11P	HMDB00218
300	Silver	Polar metabolomics	Ag NP-NM300K 01h	295.876	1.395	0.00245
301	Silver	Polar metabolomics	Ag NP-NM300K 01h	172.04	1.393	0.0314	['L-Methionine', 'Penicillamine', 'Racemethionine']	C5H11NO2S	HMDB00696;HMDB14997;HMDB33951
302	Silver	Polar metabolomics	Ag NP-NM300K 01h	325.887	1.393	0.00157
303	Silver	Polar metabolomics	Ag NP-NM300K 01h	132.102	1.392	0.00102	['L-Isoleucine', 'L-Alloisoleucine', 'L-Leucine', 'L-Norleucine', 'Aminocaproic acid', 'Beta-Leucine', 'D-Leucine', '3-Aminocaproic acid', '6-Deoxyfagomine', 'N-(2-Hydroxyethyl)-morpholine', 'N-methylvaline']	C6H13NO2	HMDB00172;HMDB00557;HMDB00687;HMDB01645;HMDB01901;HMDB03640;HMDB13773;HMDB29168;HMDB36382;HMDB60650;HMDB61716	LMFA01100047;LMFA01100042;LMFA01100035;
304	Silver	Polar metabolomics	Ag NP-NM300K 01h	188.014	1.392	0.0261	['L-Methionine', 'Penicillamine', 'Racemethionine'];['L-Glutamic acid', 'N-Methyl-D-aspartic acid', 'N-Acetylserine', 'O-Acetylserine', 'D-Glutamic acid', 'L-4-Hydroxyglutamate semialdehyde', '3-(Carboxymethylamino)propanoic acid', 'DL-Glutamate'];['4-Hydroxybenzyl isothiocyanate']	C5H11NO2S;C5H9NO4;C8H7NOS	HMDB00696;HMDB14997;HMDB33951;HMDB00148;HMDB02393;HMDB02931;HMDB03011;HMDB03339;HMDB06556;HMDB33550;HMDB60475;HMDB32580
305	Silver	Polar metabolomics	Ag NP-NM300K 01h	242.078	1.392	0.00598	['L-Acetylcarnitine'];['N-Deschlorobenzoyl indomethacin', 'Nigellimine N-oxide', 'alpha-Hydroxy-1-methyl-1H-indole-3-propanoic acid', 'alpha-Methoxy-1H-indole-3-propanoic acid']	C9H17NO4;C12H13NO3	HMDB00201;HMDB13988;HMDB33436;HMDB38338;HMDB38339
306	Silver	Polar metabolomics	Ag NP-NM300K 01h	279.946	1.392	0.00138
307	Silver	Polar metabolomics	Ag NP-NM300K 01h	183.085	1.388	0.00795
308	Silver	Polar metabolomics	Ag NP-NM300K 01h	249.998	1.388	0.00715
309	Silver	Polar metabolomics	Ag NP-NM300K 01h	86.0964	1.386	0.000799	['Piperidine']	C5H11N	HMDB34301
310	Silver	Polar metabolomics	Ag NP-NM300K 01h	134.106	1.385	0.000388
311	Silver	Polar metabolomics	Ag NP-NM300K 01h	161.129	1.384	0.0114	['N(6)-Methyllysine', 'Isoputreanine']	C7H16N2O2	HMDB02038;HMDB06009
312	Silver	Polar metabolomics	Ag NP-NM300K 01h	208.935	1.384	0.0168
313	Silver	Polar metabolomics	Ag NP-NM300K 01h	310.095	1.383	0.0293	['Rutaecarpine']	C18H13N3O	HMDB42010
314	Silver	Polar metabolomics	Ag NP-NM300K 01h	221.042	1.382	0.00821	['Galactitol', 'Sorbitol', 'Mannitol', 'L-Iditol'];['Vanillylmandelic acid', 'Syringic acid', '3-(3,4-Dihydroxyphenyl)lactic acid', '3-Hydroxy-4-methoxymandelate', 'Ethyl gallate', '3,4-O-Dimethylgallic acid']	C6H14O6;C9H10O5	HMDB00107;HMDB00247;HMDB00765;HMDB11632;HMDB00291;HMDB02085;HMDB03503;HMDB29170;HMDB33836;HMDB41662
315	Silver	Polar metabolomics	Ag NP-NM300K 01h	299.1	1.382	0.0462	['L-gamma-glutamyl-L-isoleucine ', 'L-gamma-glutamyl-L-leucine ']	C11H20N2O5	HMDB11170;HMDB11171
316	Silver	Polar metabolomics	Ag NP-NM300K 01h	569.924	1.382	0.0321
317	Silver	Polar metabolomics	Ag NP-NM300K 01h	284.003	1.38	0.00476
318	Silver	Polar metabolomics	Ag NP-NM300K 01h	450.97	1.378	0.0161
319	Silver	Polar metabolomics	Ag NP-NM300K 01h	156.042	1.377	0.0161	['Betaine', 'L-Valine', 'Vaporole', 'N-Methyl-a-aminoisobutyric acid', '5-Aminopentanoic acid', 'Norvaline', 'Amyl Nitrite'];['N-Methylethanolaminium phosphate'];['Indoxyl', '4-Hydroxybenzeneacetonitrile', '2-Methyl-4,5-benzoxazole', '5-Hydroxyindole', 'Mandelonitrile', '1,3-Dihydro-(2H)-indol-2-one']	C5H11NO2;C3H10NO4P;C8H7NO	HMDB00043;HMDB00883;HMDB01382;HMDB02141;HMDB03355;HMDB13716;HMDB15550;HMDB60173;HMDB04094;HMDB29757;HMDB32390;HMDB59805;HMDB60486;HMDB61918	LMFA01100040;
320	Silver	Polar metabolomics	Ag NP-NM300K 01h	239.962	1.377	0.0248
321	Silver	Polar metabolomics	Ag NP-NM300K 01h	194.022	1.376	0.0143
322	Silver	Polar metabolomics	Ag NP-NM300K 01h	422.923	1.376	0.0204
323	Silver	Polar metabolomics	Ag NP-NM300K 01h	117.074	1.372	0.0262
324	Silver	Polar metabolomics	Ag NP-NM300K 01h	281.943	1.372	0.00102
325	Silver	Polar metabolomics	Ag NP-NM300K 01h	142.048	1.37	0.0188	['L-Threonine', 'L-Homoserine', 'L-Allothreonine', 'Hydroxyethyl glycine', '4-Amino-3-hydroxybutyrate']	C4H9NO3	HMDB00167;HMDB00719;HMDB04041;HMDB61148;HMDB61877
326	Silver	Polar metabolomics	Ag NP-NM300K 01h	466.006	1.367	0.0211	['Thiamine pyrophosphate']	C12H19N4O7P2S	HMDB01372
327	Silver	Polar metabolomics	Ag NP-NM300K 01h	176.066	1.366	0.0113	['(R)-Amphetamine', 'Amphetamine', 'Dextroamphetamine', '3-Butylpyridine', '3-(2-Methylpropyl)pyridine', '2-(2-Methylpropyl)pyridine']	C9H13N	HMDB12128;HMDB14328;HMDB15516;HMDB32934;HMDB37287;HMDB37291
328	Silver	Polar metabolomics	Ag NP-NM300K 01h	128.032	1.364	0.0112	['L-Serine', 'D-Serine']	C3H7NO3	HMDB00187;HMDB03406
329	Silver	Polar metabolomics	Ag NP-NM300K 01h	368.029	1.364	0.0213
330	Silver	Polar metabolomics	Ag NP-NM300K 01h	507.925	1.364	0.0202
331	Silver	Polar metabolomics	Ag NP-NM300K 01h	204.063	1.363	0.0199	['L-Tyrosine', '4-Hydroxy-4-(3-pyridyl)-butanoic acid', 'L-Threo-3-Phenylserine', 'Beta-Tyrosine', 'o-Tyrosine', 'Meta-Tyrosine', '4,6,7-Trihydroxy-1,2,3,4-tetrahydroisoquinoline']	C9H11NO3	HMDB00158;HMDB01119;HMDB02184;HMDB03831;HMDB06050;HMDB59720;HMDB60280
332	Silver	Polar metabolomics	Ag NP-NM300K 01h	245.949	1.362	0.0261
333	Silver	Polar metabolomics	Ag NP-NM300K 01h	273.055	1.362	0.00224	['Glycerol 1-propanoate diacetate'];['2-[(5-Methylsulfinyl)-4-penten-2-ynylidene]-1,6-dioxaspiro[4.4]non-3-ene']	C10H16O6;C13H14O3S	HMDB31640;HMDB32670
334	Silver	Polar metabolomics	Ag NP-NM300K 01h	334.881	1.362	0.0068
335	Silver	Polar metabolomics	Ag NP-NM300K 01h	565.883	1.361	0.0301
336	Silver	Polar metabolomics	Ag NP-NM300K 01h	252.06	1.357	0.0448
337	Silver	Polar metabolomics	Ag NP-NM300K 01h	505.928	1.356	0.026
338	Silver	Polar metabolomics	Ag NP-NM300K 01h	324.852	1.354	0.00513
339	Silver	Polar metabolomics	Ag NP-NM300K 01h	190.912	1.352	0.0382
340	Silver	Polar metabolomics	Ag NP-NM300K 01h	210.05	1.351	0.0179
341	Silver	Polar metabolomics	Ag NP-NM300K 01h	236.021	1.349	0.00876
342	Silver	Polar metabolomics	Ag NP-NM300K 01h	154.027	1.348	0.0382	['L-Proline', 'D-Proline', 'Acetamidopropanal', '4-Amino-2-methylenebutanoic acid', 'Pterolactam']	C5H9NO2	HMDB00162;HMDB03411;HMDB12880;HMDB30409;HMDB34208
343	Silver	Polar metabolomics	Ag NP-NM300K 01h	170.058	1.347	0.0114	['L-Isoleucine', 'L-Alloisoleucine', 'L-Leucine', 'L-Norleucine', 'Aminocaproic acid', 'Beta-Leucine', 'D-Leucine', '3-Aminocaproic acid', '6-Deoxyfagomine', 'N-(2-Hydroxyethyl)-morpholine', 'N-methylvaline'];['Phosphodimethylethanolamine'];['Indole-3-carbinol', '1-(2-Furanylmethyl)-1H-pyrrole', '4-(2-Furanylmethylene)-3,4-dihydro-2H-pyrrole', '3-(2-Furanylmethyl)-1H-pyrrole']	C6H13NO2;C4H12NO4P;C9H9NO	HMDB00172;HMDB00557;HMDB00687;HMDB01645;HMDB01901;HMDB03640;HMDB13773;HMDB29168;HMDB36382;HMDB60650;HMDB61716;HMDB60244;HMDB05785;HMDB30204;HMDB40009;HMDB40011	LMFA01100047;LMFA01100042;LMFA01100035;
344	Silver	Polar metabolomics	Ag NP-NM300K 01h	567.88	1.346	0.0331
345	Silver	Polar metabolomics	Ag NP-NM300K 01h	244.011	1.345	0.0358
346	Silver	Polar metabolomics	Ag NP-NM300K 01h	489.984	1.341	0.0176
347	Silver	Polar metabolomics	Ag NP-NM300K 01h	119.09	1.34	0.00715
348	Silver	Polar metabolomics	Ag NP-NM300K 01h	170.021	1.338	0.00102	['4-Hydroxyproline', 'N-Acetyl-L-alanine', 'Propionylglycine', '5-Aminolevulinic acid', 'L-Glutamic gamma-semialdehyde', '3-Hydroxy-L-proline', '4-Hydroxy-L-proline', '5-Amino-2-oxopentanoic acid', '4-Hydroxy-2-pyrrolidinecarboxylic acid', 'Trans-3-hydroxy-L-proline', 'cis-4-Hydroxy-D-proline', 'N-Acetyl-beta-alanine'];['2-Amino-3-phosphonopropionic acid'];['Indole-5,6-quinone', 'Agrocybin', '1H-…	C5H9NO3;C3H8NO5P;C8H5NO2	HMDB00725;HMDB00766;HMDB00783;HMDB01149;HMDB02104;HMDB02113;HMDB06055;HMDB06272;HMDB36576;HMDB59659;HMDB60460;HMDB61880;HMDB00370;HMDB06779;HMDB30481;HMDB61933	LMFA01100055;LMFA01060169;
349	Silver	Polar metabolomics	Ag NP-NM300K 01h	170.092	1.335	0.0218	['1-Methylhistidine', '3-Methylhistidine']	C7H11N3O2	HMDB00001;HMDB00479
350	Silver	Polar metabolomics	Ag NP-NM300K 01h	293.98	1.332	0.0129
351	Silver	Polar metabolomics	Ag NP-NM300K 01h	291.983	1.331	0.0114
352	Silver	Polar metabolomics	Ag NP-NM300K 01h	220.009	1.33	0.0183
353	Silver	Polar metabolomics	Ag NP-NM300K 01h	466.818	1.329	0.0109
354	Silver	Polar metabolomics	Ag NP-NM300K 01h	267.077	1.327	0.0278	['Biotin']	C10H16N2O3S	HMDB00030
355	Silver	Polar metabolomics	Ag NP-NM300K 01h	370.026	1.327	0.0166	['Piroxicam']	C15H13N3O4S	HMDB14694
356	Silver	Polar metabolomics	Ag NP-NM300K 01h	268.009	1.326	0.0193
357	Silver	Polar metabolomics	Ag NP-NM300K 01h	162.05	1.324	0.0231	['N,N-Dimethylaniline', '1-Phenylethylamine', 'Phenylethylamine', '5-Ethyl-2-methylpyridine', '2-Propylpyridine', '2-Ethyl-5-methylpyridine', '2-Phenylethanaminium', '2,6-Dimethylaniline']	C8H11N	HMDB01020;HMDB02017;HMDB12275;HMDB29729;HMDB32497;HMDB40041;HMDB60276;HMDB60677
358	Silver	Polar metabolomics	Ag NP-NM300K 01h	295.977	1.324	0.014
359	Silver	Polar metabolomics	Ag NP-NM300K 01h	262.946	1.323	0.0063
360	Silver	Polar metabolomics	Ag NP-NM300K 01h	327.964	1.322	0.00427
361	Silver	Polar metabolomics	Ag NP-NM300K 01h	320.904	1.319	0.0107
362	Silver	Polar metabolomics	Ag NP-NM300K 01h	188.068	1.314	0.0485	['Triethanolamine'];['L-Phenylalanine', '3-Pyridinebutanoic acid', 'Benzocaine', 'Norsalsolinol', 'Gentiatibetine', 'Ethyl 2-aminobenzoate', 'Methyl N-methylanthranilate', 'Benzyl glycinate']	C6H15NO3;C9H11NO2	HMDB32538;HMDB00159;HMDB01007;HMDB04992;HMDB06044;HMDB33485;HMDB33589;HMDB34169;HMDB59934
363	Silver	Polar metabolomics	Ag NP-NM300K 01h	221.988	1.314	0.00321
364	Silver	Polar metabolomics	Ag NP-NM300K 01h	510.755	1.309	0.0238
365	Silver	Polar metabolomics	Ag NP-NM300K 01h	227.108	1.307	0.0324
366	Silver	Polar metabolomics	Ag NP-NM300K 01h	466.283	1.307	0.0215
367	Silver	Polar metabolomics	Ag NP-NM300K 01h	308.027	1.306	0.0314
368	Silver	Polar metabolomics	Ag NP-NM300K 01h	420.66	1.305	0.0221
369	Silver	Polar metabolomics	Ag NP-NM300K 01h	301.97	1.301	0.0162
370	Silver	Polar metabolomics	Ag NP-NM300K 01h	176.029	1.3	0.00771	['N-Acetylarylamine', '2-Phenylacetamide', '2-Aminoacetophenone', ""2'-Aminoacetophenone"", '2-Acetyl-4-methylpyridine', '2-Acetyl-6-methylpyridine', '2,3-Dihydro-1H-pyrrolizine-5-carboxaldehyde', '5-(2-Furanyl)-3,4-dihydro-2H-pyrrole', '2-Acetyl-5-methylpyridine', '4-Acetyl-2-methylpyridine', '4-Acetyl-3-methylpyridine']	C8H9NO	HMDB01250;HMDB10715;HMDB32628;HMDB32630;HMDB37071;HMDB37072;HMDB40008;HMDB40013;HMDB40222;HMDB40223;HMDB40224
371	Silver	Polar metabolomics	Ag NP-NM300K 01h	260.027	1.3	0.0324
372	Silver	Polar metabolomics	Ag NP-NM300K 01h	568.712	1.292	0.0353
373	Silver	Polar metabolomics	Ag NP-NM300K 01h	154.084	1.291	0.0496	['L-Isoleucine', 'L-Alloisoleucine', 'L-Leucine', 'L-Norleucine', 'Aminocaproic acid', 'Beta-Leucine', 'D-Leucine', '3-Aminocaproic acid', '6-Deoxyfagomine', 'N-(2-Hydroxyethyl)-morpholine', 'N-methylvaline']	C6H13NO2	HMDB00172;HMDB00557;HMDB00687;HMDB01645;HMDB01901;HMDB03640;HMDB13773;HMDB29168;HMDB36382;HMDB60650;HMDB61716	LMFA01100047;LMFA01100042;LMFA01100035;
374	Silver	Polar metabolomics	Ag NP-NM300K 01h	353.947	1.287	0.00905
375	Silver	Polar metabolomics	Ag NP-NM300K 01h	260.949	1.286	0.00983
376	Silver	Polar metabolomics	Ag NP-NM300K 01h	277.967	1.283	0.0285
377	Silver	Polar metabolomics	Ag NP-NM300K 01h	274.006	1.282	0.0282
378	Silver	Polar metabolomics	Ag NP-NM300K 01h	302.745	1.28	0.0281
379	Silver	Polar metabolomics	Ag NP-NM300K 01h	296.936	1.279	0.0114
380	Silver	Polar metabolomics	Ag NP-NM300K 01h	320.985	1.279	0.0202
381	Silver	Polar metabolomics	Ag NP-NM300K 01h	282.009	1.278	0.0441
382	Silver	Polar metabolomics	Ag NP-NM300K 01h	279.964	1.277	0.0218
383	Silver	Polar metabolomics	Ag NP-NM300K 01h	425.979	1.277	0.0353
384	Silver	Polar metabolomics	Ag NP-NM300K 01h	205.068	1.276	0.0063	['Galactitol', 'Sorbitol', 'Mannitol', 'L-Iditol']	C6H14O6	HMDB00107;HMDB00247;HMDB00765;HMDB11632
385	Silver	Polar metabolomics	Ag NP-NM300K 01h	216.985	1.275	0.014
386	Silver	Polar metabolomics	Ag NP-NM300K 01h	258.074	1.273	0.0233	['Pantothenic acid'];['3-Oxo-carbofuran']	C9H17NO5;C12H13NO4	HMDB00210;HMDB32776
387	Silver	Polar metabolomics	Ag NP-NM300K 01h	353.983	1.269	0.00157
388	Silver	Polar metabolomics	Ag NP-NM300K 01h	270.001	1.268	0.0424
389	Silver	Polar metabolomics	Ag NP-NM300K 01h	281.985	1.267	0.0356
390	Silver	Polar metabolomics	Ag NP-NM300K 01h	318.907	1.267	0.0228
391	Silver	Polar metabolomics	Ag NP-NM300K 01h	263.027	1.264	0.00669
392	Silver	Polar metabolomics	Ag NP-NM300K 01h	123.941	1.261	0.0496
393	Silver	Polar metabolomics	Ag NP-NM300K 01h	411.941	1.253	0.019
394	Silver	Polar metabolomics	Ag NP-NM300K 01h	303.967	1.246	0.0261
395	Silver	Polar metabolomics	Ag NP-NM300K 01h	413.939	1.245	0.0207
396	Silver	Polar metabolomics	Ag NP-NM300K 01h	438.819	1.243	0.0236
397	Silver	Polar metabolomics	Ag NP-NM300K 01h	355.98	1.235	0.00122
398	Silver	Polar metabolomics	Ag NP-NM300K 01h	515.978	1.233	0.0382
399	Silver	Polar metabolomics	Ag NP-NM300K 01h	332.077	1.232	0.0436	['Glutamyl-Phenylalanine', 'Phenylalanyl-Glutamate']	C14H17N2O5	HMDB28826;HMDB28994
400	Silver	Polar metabolomics	Ag NP-NM300K 01h	474.937	1.222	0.0305
401	Silver	Polar metabolomics	Ag NP-NM300K 01h	490.958	1.22	0.0218
402	Silver	Polar metabolomics	Ag NP-NM300K 01h	496.001	1.22	0.0316
403	Silver	Polar metabolomics	Ag NP-NM300K 01h	492.955	1.218	0.0352
404	Silver	Polar metabolomics	Ag NP-NM300K 01h	451.035	1.217	0.0421
405	Silver	Polar metabolomics	Ag NP-NM300K 01h	249.962	1.216	0.0309
406	Silver	Polar metabolomics	Ag NP-NM300K 01h	471.898	1.214	0.0293
407	Silver	Polar metabolomics	Ag NP-NM300K 01h	296.025	1.205	0.022
408	Silver	Polar metabolomics	Ag NP-NM300K 01h	334.902	1.204	0.0371
409	Silver	Polar metabolomics	Ag NP-NM300K 01h	374.037	1.202	0.0282
410	Silver	Polar metabolomics	Ag NP-NM300K 01h	493.996	1.202	0.0231
411	Silver	Polar metabolomics	Ag NP-NM300K 01h	433.993	1.201	0.0199
412	Silver	Polar metabolomics	Ag NP-NM300K 01h	431.996	1.199	0.023
413	Silver	Polar metabolomics	Ag NP-NM300K 01h	434.996	1.188	0.0223
414	Silver	Polar metabolomics	Ag NP-NM300K 01h	450.032	1.187	0.0452
415	Silver	Polar metabolomics	Ag NP-NM300K 01h	432.999	1.182	0.0314
416	Silver	Polar metabolomics	Ag NP-NM300K 01h	193.998	1.181	0.0486	['N-Methylethanolaminium phosphate']	C3H10NO4P	HMDB60173
417	Silver	Polar metabolomics	Ag NP-NM300K 01h	472.014	1.181	0.029
418	Silver	Polar metabolomics	Ag NP-NM300K 01h	375.041	1.18	0.0314
419	Silver	Polar metabolomics	Ag NP-NM300K 01h	489.954	1.175	0.0498
420	Silver	Polar metabolomics	Ag NP-NM300K 01h	310.876	1.173	0.0314
421	Silver	Polar metabolomics	Ag NP-NM300K 01h	308.879	1.171	0.0421
422	Silver	Polar metabolomics	Ag NP-NM300K 01h	376.042	1.171	0.0497
423	Silver	Polar metabolomics	Ag NP-NM300K 01h	228.063	1.169	0.0428	['N-Methylcalystegine B2'];['Indolelactic acid', '5-Methoxyindoleacetate', 'Cinnamoylglycine', 'Edulitine', 'Methyl 1-methoxy-1H-indole-3-carboxylate', '3-Indolehydracrylic acid']	C8H15NO4;C11H11NO3	HMDB36604;HMDB00671;HMDB04096;HMDB11621;HMDB30179;HMDB32755;HMDB59765
424	Silver	Polar metabolomics	Ag NP-NM300K 01h	491.951	1.168	0.0387
425	Silver	Polar metabolomics	Ag NP-NM300K 01h	452.816	1.139	0.0414
426	Silver	Polar metabolomics	Ag NP-NM300K 01h	405.907	1.101	0.0436
427	Silver	Polar metabolomics	Ag NP-NM300K 01h	202.092	0.903	0.0411
428	Silver	Polar metabolomics	Ag NP-NM300K 01h	483.076	0.896	0.0436
429	Silver	Polar metabolomics	Ag NP-NM300K 01h	212.839	0.886	0.041
430	Silver	Polar metabolomics	Ag NP-NM300K 01h	180.904	0.878	0.0499
431	Silver	Polar metabolomics	Ag NP-NM300K 01h	195.078	0.878	0.028	['4-Hydroxynonenal', '2,4-Nonanedione', '2-Nonenoic acid', '6-Butyltetrahydro-2H-pyran-2-one', 'Dihydro-5-pentyl-2(3H)-furanone', 'cis-Ethyl 4-heptenoate', 'Hept-trans-2-en-1-yl acetate', 'Methyl 2-octenoate', 'Prenyl isobutyrate', 'Ethyl cyclohexanecarboxylate', '4-Oxononanal', 'Quercuslactone a', '2-Propenyl 2-ethylbutanoate', 'Cyclohexyl propionate', '2-Hydroxy-2,6,6-trimethylcyclohexanone', '…	C9H16O2;C12H12O	HMDB04362;HMDB31263;HMDB31271;HMDB31514;HMDB31531;HMDB32265;HMDB32307;HMDB32413;HMDB32491;HMDB33167;HMDB34716;HMDB35307;HMDB36208;HMDB36222;HMDB37023;HMDB37496;HMDB37618;HMDB37629;HMDB38272;HMDB38275;HMDB39736;HMDB39794;HMDB40210;HMDB59728;HMDB59817;HMDB59840;HMDB59894;HMDB60286;HMDB29688;HMDB31621	LMFA06000051;
432	Silver	Polar metabolomics	Ag NP-NM300K 01h	390.709	0.878	0.026
433	Silver	Polar metabolomics	Ag NP-NM300K 01h	213.088	0.877	0.0477	['2,4,6-Triethyl-1,3,5-trioxane'];['1-(4-Methoxyphenyl)-1-penten-3-one', '3-(2-Methylpropylidene)-3alpha,4-dihydro-1(3H)-isobenzofuranone', '(S)-3-Butyl-1(3H)-isobenzofuranone', 'Benzyl trans-2-methyl-2-butenoate', 'Prenyl benzoate', '(R)-3,7-Dimethyl-5-indanecarboxylic acid', 'Ligustilide', 'Benzyl tiglate', 'Propyl cinnamate', 'Isopropyl cinnamate', 'Cinnamyl propionate']	C9H18O3;C12H14O2	HMDB34040;HMDB30905;HMDB32027;HMDB32064;HMDB32177;HMDB32488;HMDB33033;HMDB34277;HMDB37627;HMDB37700;HMDB37701;HMDB41315
434	Silver	Polar metabolomics	Ag NP-NM300K 01h	251.14	0.877	0.0407	['10-Undecenyl acetate', 'Methyl (E)-2-dodecenoate', 'Coniferan', 'Ethyl 10-undecenoate', 'Rhodinyl propionate', 'Citronellyl propionate', '1-Ethylhexyl tiglate', '2,6,10,10-Tetramethyl-1-oxaspiro[4.5]decan-6-ol', '1,1-Diethoxy-2,6-nonadiene', '4-(3-Hydroxybutyl)-3,3,5-trimethylcyclohexanone', 'Oxacyclotetradecan-2-one']	C13H24O2	HMDB31017;HMDB31028;HMDB31741;HMDB34286;HMDB37187;HMDB37226;HMDB37626;HMDB37907;HMDB38078;HMDB39805;HMDB40451
435	Silver	Polar metabolomics	Ag NP-NM300K 01h	234.922	0.875	0.0342
436	Silver	Polar metabolomics	Ag NP-NM300K 01h	195.063	0.874	0.0486	['Temozolomide'];['2-Octenedioic acid', 'cis-4-Octenedioic acid', 'trans-3-Octenedioic acid', '3-Isopropenylpentanedioic acid', 'Ethyl 2,4-dioxohexanoate', 'Diethyl fumarate']	C6H6N6O2;C8H12O4	HMDB14991;HMDB00341;HMDB04982;HMDB13312;HMDB32352;HMDB34851;HMDB38601	LMFA01170078;
437	Silver	Polar metabolomics	Ag NP-NM300K 01h	296.821	0.874	0.0456
438	Silver	Polar metabolomics	Ag NP-NM300K 01h	300.816	0.874	0.034
439	Silver	Polar metabolomics	Ag NP-NM300K 01h	396.743	0.873	0.0479
440	Silver	Polar metabolomics	Ag NP-NM300K 01h	298.818	0.871	0.0414
441	Silver	Polar metabolomics	Ag NP-NM300K 01h	238.069	0.87	0.0358
442	Silver	Polar metabolomics	Ag NP-NM300K 01h	402.735	0.87	0.042
443	Silver	Polar metabolomics	Ag NP-NM300K 01h	305.001	0.868	0.0109	['Sinalbin B']	C12H12N2OS2	HMDB36649
444	Silver	Polar metabolomics	Ag NP-NM300K 01h	307.203	0.868	0.0363	['Cyclohexaneundecanoic acid', '(Z)-9-Heptadecenoic acid', '2,4-Heptadecanedione', '10Z-Heptadecenoic acid', '7-Hexadecenoic acid, methyl ester'];['Retinal', '11-cis-Retinaldehyde', '9-cis-Retinal', '13-cis-Retinal', 'Vitamin A2', 'delta6-Dehydroferruginol']	C17H32O2;C20H28O	HMDB30997;HMDB31046;HMDB40888;HMDB60038;HMDB61858;HMDB01358;HMDB02152;HMDB06218;HMDB06220;HMDB13117;HMDB35151	LMPR01090002;LMPR01090003;LMPR01090017;LMPR01090018;LMPR01090008;
445	Silver	Polar metabolomics	Ag NP-NM300K 01h	169.062	0.867	0.0266	['Heptanoic acid', 'Ethyl isovalerate', 'Butyl propionate', 'Isopentyl acetate', '2-Methylhexanoic acid', '5-Methylhexanoic acid', 'cis- and trans-2-Isopropyl-4-methyl-1,3-dioxolane', 'Hexyl formate', 'Ethyl 2-methylbutyrate', '2-Methylbutyl acetate', '2-Methylpropyl propanoate', 'Methyl hexanoate', 'Propyl 2-methylpropanoate', 'Methyl 4-methylpentanoate', 'Isopropyl 2-methylpropanoate', 'Pentyl …	C7H14O2;C10H10O	HMDB00666;HMDB30028;HMDB30052;HMDB31528;HMDB31594;HMDB31595;HMDB32204;HMDB32874;HMDB33745;HMDB34166;HMDB34239;HMDB35238;HMDB36209;HMDB36238;HMDB38227;HMDB39095;HMDB39618;HMDB39619;HMDB40297;HMDB29602;HMDB29640;HMDB31566;HMDB31617;HMDB31619;HMDB33176;HMDB35925;HMDB59897	LMFA01010007;
446	Silver	Polar metabolomics	Ag NP-NM300K 01h	254.181	0.866	0.043
447	Silver	Polar metabolomics	Ag NP-NM300K 01h	412.738	0.866	0.0495
448	Silver	Polar metabolomics	Ag NP-NM300K 01h	416.733	0.864	0.0299
449	Silver	Polar metabolomics	Ag NP-NM300K 01h	274.881	0.863	0.0314
450	Silver	Polar metabolomics	Ag NP-NM300K 01h	291.879	0.862	0.0195
451	Silver	Polar metabolomics	Ag NP-NM300K 01h	392.753	0.862	0.0336
452	Silver	Polar metabolomics	Ag NP-NM300K 01h	154.056	0.86	0.0284
453	Silver	Polar metabolomics	Ag NP-NM300K 01h	277.214	0.86	0.0262	['Hypogeic acid', 'Palmitoleic acid', 'Trans-Hexa-dec-2-enoic acid', 'Palmitelaidic acid', '(E)-6-Hexadecenoic acid', '5-Dodecyldihydro-2(3H)-furanone', '15-Hexadecanolide', '(Z)-5-Hexadecenoic acid', '(E)-3-Hexadecenoic acid', '(Z)-13-Hexadecenoic acid', '(E)-11-Hexadecenoic acid', 'Citronellyl hexanoate', '(Z)-14-Methyl-6-pentadecenoic acid']	C16H30O2	HMDB02186;HMDB03229;HMDB10735;HMDB12328;HMDB31053;HMDB31145;HMDB31711;HMDB32638;HMDB33791;HMDB35877;HMDB37647;HMDB38958;HMDB41422	LMFA01030766;LMFA01030056;LMFA01030054;LMFA01030057;
454	Silver	Polar metabolomics	Ag NP-NM300K 01h	278.217	0.859	0.0195
455	Silver	Polar metabolomics	Ag NP-NM300K 01h	334.747	0.859	0.0353
456	Silver	Polar metabolomics	Ag NP-NM300K 01h	333.24	0.857	0.0117	['(R)-2-Hydroxysterculic acid']	C19H34O3	HMDB31060
457	Silver	Polar metabolomics	Ag NP-NM300K 01h	116.04	0.856	0.0352
458	Silver	Polar metabolomics	Ag NP-NM300K 01h	245.151	0.855	0.0352	['Rishitin', 'Kobusone', 'Isokobusone', '(10betaH,11xi)-11-Hydroxy-13-nor-6-eremophilen-8-one', 'Acetaldehyde butyl phenethyl acetal', '2,6-Di-tert-butyl-1,4-benzenediol']	C14H22O2	HMDB35593;HMDB36790;HMDB36791;HMDB37605;HMDB37820;HMDB40178
459	Silver	Polar metabolomics	Ag NP-NM300K 01h	416.78	0.855	0.0436
460	Silver	Polar metabolomics	Ag NP-NM300K 01h	215.068	0.854	0.0043	['(R)-Shinanolone', 'Methyl trans-p-methoxycinnamate', 'Allyl phenoxyacetate', 'Ethyl phenylglycidate', 'Dehydrozingerone', 'Isomyristicin', 'Myristicin', '(Z)-4-Methoxy-6-(1-propenyl)-1,3-benzodioxole', 'Isoeugenol formate', 'Eugenyl formate', 'Ethyl 3-oxo-3-phenylpropanoate', 'Benzyl acetoacetate', ""1'-Hydroxychavicol acetate"", '4-(3,4-Methylenedioxyphenyl)-2-butanone']	C11H12O3	HMDB30580;HMDB30752;HMDB31610;HMDB31623;HMDB32591;HMDB35275;HMDB35873;HMDB35894;HMDB37277;HMDB37877;HMDB40268;HMDB40446;HMDB41007;HMDB41481
461	Silver	Polar metabolomics	Ag NP-NM300K 01h	240.084	0.853	0.025
462	Silver	Polar metabolomics	Ag NP-NM300K 01h	216.923	0.852	0.0314
463	Silver	Polar metabolomics	Ag NP-NM300K 01h	233.921	0.851	0.0462
464	Silver	Polar metabolomics	Ag NP-NM300K 01h	269.208	0.851	0.0256	['8,8-Diethoxy-2,6-dimethyl-2-octanol']	C14H30O3	HMDB34557
465	Silver	Polar metabolomics	Ag NP-NM300K 01h	273.146	0.851	0.0356	['Gemfibrozil', '1-Hydroxyacorenone', 'Blennin A', 'Procurcumadiol', '(3beta,6beta)-Furanoeremophilane-3,6-diol', 'Heliannuol D', '(6beta,8alpha)-6-Hydroxy-7(11)-eremophilen-12,8-olide', 'Ketosantalic acid', '3-Hydroxytrichothecene', 'Piperdial', '3beta-Dihydroxymarasmene', '13-Hydroxymarasmene', '3-Ketoapotrichothecene', 'Valerenolic acid', 'Ketopelenolide a', 'FS4 toxin', 'Lactaronecatorin A', …	C15H22O3	HMDB15371;HMDB30917;HMDB31901;HMDB34721;HMDB35117;HMDB35137;HMDB35148;HMDB35358;HMDB35760;HMDB35798;HMDB36036;HMDB36037;HMDB36550;HMDB36563;HMDB36664;HMDB37064;HMDB37529;HMDB37559;HMDB39156;HMDB39635;HMDB39644;HMDB40754;HMDB61839
466	Silver	Polar metabolomics	Ag NP-NM300K 01h	328.756	0.851	0.0407
467	Silver	Polar metabolomics	Ag NP-NM300K 01h	199.073	0.85	0.00576	['7-Hydroxyoctanoic acid', 'Hydroxyoctanoic acid', '3-Hydroxyoctanoic acid', '(R)-2-Hydroxycaprylic acid', '(R)-3-Hydroxyoctanoic acid', '5-Hydroxyvalproic acid', '3-Hydroxyvalproic acid', '4-Hydroxyvalproic acid', '(+/-)-Ethyl 2-hydroxy-3-methylvalerate', 'Peroxyoctanoic acid', 'Isoamyl lactate', 'Ethyl 2-hydroxy-4-methylpentanoate'];['Cinnamyl acetate', 'Ethyl cinnamate', '2-Propenyl phenylacet…	C8H16O3;C11H12O2	HMDB00486;HMDB00711;HMDB01954;HMDB02264;HMDB10722;HMDB13898;HMDB13899;HMDB13900;HMDB32270;HMDB32827;HMDB59825;HMDB59867;HMDB29699;HMDB33834;HMDB36905;HMDB37142;HMDB37145	LMFA01050229;LMFA01050020;LMFA01050021;LMFA01050313;LMFA01050314;
468	Silver	Polar metabolomics	Ag NP-NM300K 01h	332.798	0.85	0.0315
469	Silver	Polar metabolomics	Ag NP-NM300K 01h	153.052	0.849	0.023	['2-Methyl-3-ketovaleric acid', '3-Methyl-2-oxovaleric acid', 'Ketoleucine', '2-Ketohexanoic acid', 'Mevalonolactone', '3-Oxohexanoic acid', 'Adipate semialdehyde', '5-Ethoxy-4,5-dihydro-2(3H)furanone', 'Ethyl acetoacetate', 'Ethyl 3-oxobutanoate', 'Sherry lactone', '(4S,6S)-3,4,5,6-Tetrahydro-4-hydroxy-6-methyl-2H-pyran-2-one', 'Acetoin acetate', 'Methyl levulinate', 'Pantolactone', '4-Acetylbut…	C6H10O3	HMDB00408;HMDB00491;HMDB00695;HMDB01864;HMDB06024;HMDB10717;HMDB12882;HMDB31214;HMDB31216;HMDB31218;HMDB33286;HMDB33302;HMDB33698;HMDB41602;HMDB59876;HMDB61881	LMFA01060007;LMFA01060008;
470	Silver	Polar metabolomics	Ag NP-NM300K 01h	354.779	0.849	0.0402
471	Silver	Polar metabolomics	Ag NP-NM300K 01h	167.068	0.848	0.0382	['4-Hydroxycyclohexylcarboxylic acid', 'Tetrahydrofurfuryl acetate', 'Botryodiplodin', 'Methyl (R)-3-methyl-2-oxopentanoate', 'Ethyl levulinate']	C7H12O3	HMDB01988;HMDB31176;HMDB36594;HMDB37114;HMDB40433
472	Silver	Polar metabolomics	Ag NP-NM300K 01h	168.071	0.848	0.0317
473	Silver	Polar metabolomics	Ag NP-NM300K 01h	209.078	0.848	0.0127	['5-(2-Methylpropyl)tetrahydro-2-oxo-3-furancarboxylic acid', '5-Butyltetrahydro-2-oxo-3-furancarboxylic acid']	C9H14O4	HMDB30988;HMDB30992
474	Silver	Polar metabolomics	Ag NP-NM300K 01h	249.219	0.848	0.0435	['Pentadecanal', '2-Pentadecanone', 'Heptyl ketone']	C15H30O	HMDB31078;HMDB31081;HMDB59813
475	Silver	Polar metabolomics	Ag NP-NM300K 01h	342.779	0.847	0.0257
476	Silver	Polar metabolomics	Ag NP-NM300K 01h	296.926	0.846	0.0177
477	Silver	Polar metabolomics	Ag NP-NM300K 01h	331.209	0.846	0.0336	['1,2,3-Tris(1-ethoxyethoxy)propane']	C15H32O6	HMDB37162
478	Silver	Polar metabolomics	Ag NP-NM300K 01h	243.135	0.844	0.0218	['2,6-Di-tert-butylbenzoquinone', '3-Phenylpropyl isovalerate', '13-Nor-6-eremophilene-8,11-dione', 'Hexyl phenylacetate', '2-Phenylethyl hexanoate', '(Z)-6-Tetradecene-1,3-diyne-5,8-diol', '13-Tetradecene-1,3-diyne-6,7-diol', '3,4-Dihydro-2,2,5,7,8-pentamethyl-2H-1-benzopyran-6-ol', '2-Methyl-1-phenyl-2-propanyl butyrate']	C14H20O2	HMDB13817;HMDB36389;HMDB37606;HMDB37714;HMDB37718;HMDB38996;HMDB39539;HMDB40217;HMDB40226
479	Silver	Polar metabolomics	Ag NP-NM300K 01h	181.047	0.841	0.0334	['Succinylacetone', 'Isopropylmaleate', 'xi-2,3-Dihydro-3,5-dihydroxy-6-methyl-4H-pyran-4-one', 'Ethyl 5-oxotetrahydro-2-furancarboxylate']	C7H10O4	HMDB00635;HMDB12241;HMDB36380;HMDB59815
480	Silver	Polar metabolomics	Ag NP-NM300K 01h	181.12	0.841	0.019	['Oenanthic ether', 'Pelargonic acid', 'xi-2-Ethylheptanoic acid', 'Methyl caprylate', 'Heptyl acetate', '4-Methyloctanoic acid', 'Butyl 3-methylbutanoate', '3-Heptyl acetate', '5-Methylhexyl acetate', '3-Octyl formate', 'Pentyl butanoate', 'Propyl hexanoate', 'Hexyl propionate', '3-Methylbutyl 2-methylpropanoate', '1-Hydroxy-3-nonanone', '3-(Hydroxymethyl)-2-octanone', '4-Methyl-2-pentyl-1,3-dio…	C9H18O2	HMDB00798;HMDB00847;HMDB30331;HMDB31291;HMDB31480;HMDB31557;HMDB32042;HMDB32309;HMDB32406;HMDB32454;HMDB34162;HMDB34165;HMDB34606;HMDB36234;HMDB37143;HMDB37164;HMDB37288;HMDB38040;HMDB38603;HMDB39216;HMDB39219;HMDB40221;HMDB40295;HMDB40430;HMDB59822	LMFA01010009;
481	Silver	Polar metabolomics	Ag NP-NM300K 01h	299.11	0.841	0.0414	['Triethyl citrate']	C12H20O7	HMDB34263
482	Silver	Polar metabolomics	Ag NP-NM300K 01h	213.146	0.84	0.035
483	Silver	Polar metabolomics	Ag NP-NM300K 01h	217.926	0.84	0.0324
484	Silver	Polar metabolomics	Ag NP-NM300K 01h	225.073	0.84	0.0314	['4-Heptenal diethyl acetal', '3-(1-Hydroxymethyl-1-propenyl)pentanedioic acid']	C9H14O5	HMDB32306;HMDB33092
485	Silver	Polar metabolomics	Ag NP-NM300K 01h	235.13	0.84	0.021	['Cucurbic acid', 'Dihydrojasmonic acid', 'Vulgarole', 'Traumatin', '3-Ethenyl-4-hydroxy-2,5-dimethylhex-5-en-2-yl acetate']	C12H20O3	HMDB29388;HMDB33601;HMDB35085;HMDB37326;HMDB41572
486	Silver	Polar metabolomics	Ag NP-NM300K 01h	278.875	0.84	0.022
487	Silver	Polar metabolomics	Ag NP-NM300K 01h	182.123	0.839	0.0217
488	Silver	Polar metabolomics	Ag NP-NM300K 01h	249.11	0.839	0.0223	['Allixin', '3,4-Methylenesebacic acid']	C12H18O4	HMDB40705;HMDB59729
489	Silver	Polar metabolomics	Ag NP-NM300K 01h	250.214	0.839	0.0235
490	Silver	Polar metabolomics	Ag NP-NM300K 01h	128.04	0.838	0.0387
491	Silver	Polar metabolomics	Ag NP-NM300K 01h	199.109	0.838	0.00977	['xi-1-Ethoxy-1-pentyloxyethane', '1,1-Diethoxypentane', '1,1-Dimethoxyheptane'];['4-Methyl-1-phenyl-2-pentanone', '(S)-4-(4-Methylphenyl)-2-pentanone', 'Rhubafuran', '3-(4-Isopropylphenyl)propanal']	C9H20O2;C12H16O	HMDB37634;HMDB38393;HMDB40432;HMDB31569;HMDB34177;HMDB36021;HMDB36171
492	Silver	Polar metabolomics	Ag NP-NM300K 01h	280.962	0.838	0.0173
493	Silver	Polar metabolomics	Ag NP-NM300K 01h	271.151	0.837	0.0228
494	Silver	Polar metabolomics	Ag NP-NM300K 01h	167.032	0.836	0.0198	['3-Hexenedioic acid', '3-Methylglutaconic acid', '(E)-2-Methylglutaconic acid', 'trans-2-Hexenedioic acid', '3-Hydroxyadipic acid 3,6-lactone', 'Dimethyl fumarate', 'Maleic acid homopolymer', 'Ethyl hydrogen fumarate']	C6H8O4	HMDB00393;HMDB00522;HMDB02266;HMDB13311;HMDB29171;HMDB31257;HMDB36232;HMDB40207	LMFA01170087;LMFA01170068;LMFA01170079;LMFA01170070;
495	Silver	Polar metabolomics	Ag NP-NM300K 01h	181.008	0.836	0.00598	['2-[(Ethylthio)methyl]furan', '2,5-Dimethyl-3-(methylthio)furan'];['Ethyl maltol', 'Furfuryl acetate', 'Ethyl furoate', 'Ethyl 3-furoate']	C7H10OS;C7H8O3	HMDB39875;HMDB40198;HMDB31735;HMDB34246;HMDB59862;HMDB59880
496	Silver	Polar metabolomics	Ag NP-NM300K 01h	253.177	0.836	0.0258	['3-[[5-Methyl-2-(1-methylethyl)cyclohexyl]oxy]-1,2-propanediol', '3-hydroxytridecanoic acid']	C13H26O3	HMDB36133;HMDB61655
497	Silver	Polar metabolomics	Ag NP-NM300K 01h	266.217	0.836	0.0296
498	Silver	Polar metabolomics	Ag NP-NM300K 01h	351.991	0.836	0.0301
499	Silver	Polar metabolomics	Ag NP-NM300K 01h	418.777	0.836	0.0349
500	Silver	Polar metabolomics	Ag NP-NM300K 01h	133.062	0.835	0.0425	['2,3,5-Trimethylfuran', '2-Ethyl-5-methylfuran', '3-Methyl-2-cyclohexen-1-one', '2-Propylfuran', '2-Isopropylfuran', '(E,Z)-2,4-Heptadienal']	C7H10O	HMDB29721;HMDB29728;HMDB31541;HMDB40277;HMDB40278;HMDB61891
501	Silver	Polar metabolomics	Ag NP-NM300K 01h	214.128	0.835	0.0448
502	Silver	Polar metabolomics	Ag NP-NM300K 01h	232.917	0.835	0.0236
503	Silver	Polar metabolomics	Ag NP-NM300K 01h	273.962	0.835	0.0359
504	Silver	Polar metabolomics	Ag NP-NM300K 01h	149.021	0.834	0.0449	['1,2,3-Trihydroxybenzene', '1,3,5-Trihydroxybenzene', 'Methyl 2-furoate', 'Maltol', '4-Hydroxy-2H-pyran-3-carboxaldehyde', '(Z)-Tamarindienal', '5-Hydroxymethyl-2-furancarboxaldehyde', '5-Methylfuran-2-carboxylic acid']	C6H6O3	HMDB13674;HMDB13675;HMDB29750;HMDB30776;HMDB31256;HMDB32651;HMDB34355;HMDB59735
505	Silver	Polar metabolomics	Ag NP-NM300K 01h	229.105	0.834	0.0314
506	Silver	Polar metabolomics	Ag NP-NM300K 01h	236.089	0.834	0.022
507	Silver	Polar metabolomics	Ag NP-NM300K 01h	236.108	0.834	0.0239
508	Silver	Polar metabolomics	Ag NP-NM300K 01h	332.84	0.834	0.0363
509	Silver	Polar metabolomics	Ag NP-NM300K 01h	474.739	0.834	0.0436
510	Silver	Polar metabolomics	Ag NP-NM300K 01h	227.162	0.833	0.0177
511	Silver	Polar metabolomics	Ag NP-NM300K 01h	242.063	0.833	0.0218
512	Silver	Polar metabolomics	Ag NP-NM300K 01h	322.28	0.833	0.0448
513	Silver	Polar metabolomics	Ag NP-NM300K 01h	222.082	0.832	0.0455
514	Silver	Polar metabolomics	Ag NP-NM300K 01h	276.878	0.832	0.023
515	Silver	Polar metabolomics	Ag NP-NM300K 01h	315.157	0.832	0.0414	['9-Acetoxyfukinanolide', 'Isotrichodermin', '(3beta,6beta)-Furanoeremophilane-3,6-diol 6-acetate', 'Acetylvalerenolic acid', 'Acetylbalchanolide', '[6]-Gingerdione', '6-Hydroxyshogaol']	C17H24O4	HMDB34658;HMDB34738;HMDB34930;HMDB35687;HMDB36693;HMDB39275;HMDB41249
516	Silver	Polar metabolomics	Ag NP-NM300K 01h	333.312	0.832	0.0186
517	Silver	Polar metabolomics	Ag NP-NM300K 01h	334.837	0.832	0.0386
518	Silver	Polar metabolomics	Ag NP-NM300K 01h	185.042	0.831	0.0485	['2-Hydroxyadipic acid', '3-Hydroxyadipic acid', '3-Hydroxymethylglutaric acid', '2(R)-Hydroxyadipic acid', 'Levoglucosan', 'D-1-Deoxy-erythro-hexo-2,3-diulose', 'Diethyl dicarbonate', 'D-1,5-Anhydrofructose', '2-Hydroxy-2-ethylsuccinic acid']	C6H10O5	HMDB00321;HMDB00345;HMDB00355;HMDB00368;HMDB00640;HMDB29934;HMDB32873;HMDB41561;HMDB59758	LMFA01170049;LMFA01170088;
519	Silver	Polar metabolomics	Ag NP-NM300K 01h	185.115	0.831	0.0331	['(3R,7R)-1,3,7-Octanetriol']	C8H18O3	HMDB33625
520	Silver	Polar metabolomics	Ag NP-NM300K 01h	237.11	0.831	0.0382	['5-Hexyltetrahydro-2-oxo-3-furancarboxylic acid', 'alpha-Carboxy-delta-decalactone', '2-Carboxy-5,7-dimethyl-4-octanolide']	C11H18O4	HMDB30984;HMDB30985;HMDB30986
521	Silver	Polar metabolomics	Ag NP-NM300K 01h	275.162	0.831	0.0451	['1-Hydroxyepiacorone', 'Acorusdiol', '3(4->5)-Abeo-4,11:4,12-diepoxy-3-eudesmanol', '(4R,5S,7R,11R)-11,12-Dihydroxy-1(10)-spirovetiven-2-one', 'Apotrichodiol', '6alpha-Carissanol', 'alpha-Carissanol', 'Epioxylubimin', 'Dihydromyoporone', 'Piperalol', 'Zedoarondiol', 'Hydroxypelenolide', 'Toxin FS2', 'Urodiolenone', 'Bisacurone B', '2,3-Dihydroabscisic alcohol']	C15H24O3	HMDB30918;HMDB30919;HMDB32122;HMDB33149;HMDB34574;HMDB35309;HMDB35597;HMDB35613;HMDB35729;HMDB35767;HMDB36448;HMDB36663;HMDB37063;HMDB37969;HMDB38502;HMDB40685
522	Silver	Polar metabolomics	Ag NP-NM300K 01h	450.873	0.831	0.0218
523	Silver	Polar metabolomics	Ag NP-NM300K 01h	120.966	0.83	0.0241	['Phosphoric acid']	H3O4P	HMDB02142
524	Silver	Polar metabolomics	Ag NP-NM300K 01h	144.042	0.83	0.0451	['Diethanolamine'];['Benzamide', '3-Acetylpyridine', '2-Acetylpyridine']	C4H11NO2;C7H7NO	HMDB04437;HMDB04461;HMDB33131;HMDB35281
525	Silver	Polar metabolomics	Ag NP-NM300K 01h	171.063	0.829	0.022	['Mevalonic acid', '(R) 2,3-Dihydroxy-3-methylvalerate', 'Glycerol 1-propanoate', '(R)-mevalonate', '(2-Methoxyethoxy)propanoic acid']	C6H12O4	HMDB00227;HMDB12140;HMDB31639;HMDB59629;HMDB59705
526	Silver	Polar metabolomics	Ag NP-NM300K 01h	190.047	0.829	0.0381	['Pyridoxal', 'Isopyridoxal', '3alpha,4,5,7alpha-Tetrahydro-5-hydroxy-1H-isoindole-1,3(2H)-dione', '3alpha,4,7,7alpha-Tetrahydro-4-hydroxy-1H-isoindole-1,3(2H)-dione', '3-Methoxyanthranilate']	C8H9NO3	HMDB01545;HMDB04290;HMDB34887;HMDB34889;HMDB60374
527	Silver	Polar metabolomics	Ag NP-NM300K 01h	195.099	0.829	0.0356	['Tetrahydrofurfuryl butyrate', 'cis-3-Hexenyl lactate', '3-Methylbutyl 3-oxobutanoate', 'Butyl levulinate', 'Butyl 3-hydroxy-2-methylidenebutanoate', '2-Methylpropyl 3-hydroxy-2-methylidenebutanoate', '5-Pentyl-1,4-dioxan-2-one', '6-Pentyl-1,4-dioxan-2-one', '4-Hydroperoxy-2-nonenal']	C9H16O3	HMDB36188;HMDB36213;HMDB36396;HMDB40165;HMDB40202;HMDB40203;HMDB59936;HMDB59937;HMDB60287
528	Silver	Polar metabolomics	Ag NP-NM300K 01h	237.183	0.829	0.0228	['Tridecanoic acid', 'Ethyl undecanoate', 'Methyl dodecanoate', 'Decanal propyleneglycol acetal', 'Octyl 3-methylbutanoate', 'Pentyl octanoate', 'Octyl 2-methylbutyrate', 'Decyl propionate', '3-Methylbutyl octanoate', 'Propyl decanoate', '9-Methyldodecanoic acid', 'Isopropyl dodecanoic acid']	C13H26O2	HMDB00910;HMDB29552;HMDB31018;HMDB32211;HMDB34140;HMDB36217;HMDB36219;HMDB37311;HMDB38729;HMDB59900;HMDB61828;HMDB61829	LMFA01010013;
529	Silver	Polar metabolomics	Ag NP-NM300K 01h	259.203	0.829	0.0259	['3-(5,6,6-Trimethylbicyclo[2.2.1]hept-1-yl)cyclohexanol', 'Ambronide']	C16H28O	HMDB31851;HMDB36831
530	Silver	Polar metabolomics	Ag NP-NM300K 01h	272.982	0.829	0.00913
531	Silver	Polar metabolomics	Ag NP-NM300K 01h	277.882	0.829	0.0293
532	Silver	Polar metabolomics	Ag NP-NM300K 01h	290.876	0.829	0.0228
533	Silver	Polar metabolomics	Ag NP-NM300K 01h	280.233	0.827	0.0202
534	Silver	Polar metabolomics	Ag NP-NM300K 01h	175.037	0.826	0.0281	['2-Methylerythritol ', '3-Deoxy-D-arabinitol', '2-Deoxy-D-ribitol', '1-Deoxy-D-ribitol'];['p-Hydroxyphenylacetic acid', '3-Hydroxyphenylacetic acid', 'Ortho-Hydroxyphenylacetic acid', 'Mandelic acid', 'p-Anisic acid', '3-Cresotinic acid', '3,4-Dihydroxyphenylacetaldehyde', '4-Hydroxy-3-methylbenzoic acid', 'Vanillin', ""2,4'-Dihydroxyacetophenone"", ""2',3'-Dihydroxyacetophenone"", ""2',4'-Dihyd…	C5H12O4;C8H8O3	HMDB11659;HMDB31201;HMDB33919;HMDB41486;HMDB00020;HMDB00440;HMDB00669;HMDB00703;HMDB01101;HMDB02390;HMDB03791;HMDB04815;HMDB12308;HMDB29657;HMDB29658;HMDB29659;HMDB29660;HMDB29661;HMDB29662;HMDB31609;HMDB32399;HMDB32572;HMDB32594;HMDB32604;HMDB32606;HMDB32629;HMDB32919;HMDB33003;HMDB34172;HMDB36907;HMDB41283;HMDB60390
535	Silver	Polar metabolomics	Ag NP-NM300K 01h	349.994	0.826	0.022
536	Silver	Polar metabolomics	Ag NP-NM300K 01h	441.297	0.826	0.0281	[""11'-Carboxy-alpha-chromanol"", 'Hexadecyl ferulate']	C26H42O4	HMDB12515;HMDB39317
537	Silver	Polar metabolomics	Ag NP-NM300K 01h	157.026	0.825	0.0256	['3-Hydroxy-2-methyl-[R-(R,S)]-butanoic acid', '2-Methyl-3-hydroxybutyric acid', '2-Ethylhydracrylic acid', '2-Hydroxy-3-methylbutyric acid', '3-Hydroxy-2-methyl-[S-(R,R)]-butanoic acid', '3-Hydroxyvaleric acid', 'Erythronilic acid', '3-Hydroxyisovaleric acid', '2-Hydroxyvaleric acid', '2-Hydroxy-2-methylbutyric acid', '4-Hydroxyisovaleric acid', 'Ethyl lactate', 'Methyl 3-hydroxybutyrate', 'Diet…	C5H10O3;C8H6O2	HMDB00351;HMDB00354;HMDB00396;HMDB00407;HMDB00410;HMDB00531;HMDB00642;HMDB00754;HMDB01863;HMDB01987;HMDB02011;HMDB40735;HMDB41603;HMDB59844;HMDB61927;HMDB32469;HMDB61916	LMFA01050391;LMFA01050388;LMFA01050008;LMFA01050393;LMFA01050396;LMFA01050007;LMFA01050389;LMFA01050399;
538	Silver	Polar metabolomics	Ag NP-NM300K 01h	159.042	0.825	0.0375	['Phenylacetic acid', '2-Methylbenzoic acid', '4-Hydroxyphenylacetaldehyde', '4-Methylbenzoic acid', '4-Methoxybenzaldehyde', '3-Methoxybenzaldehyde', '3-(5-Methyl-2-furyl)prop-2-enal', ""2'-Hydroxyacetophenone"", '2-Hydroxy-4-methylbenzaldehyde', '4-(2-Furanyl)-3-buten-2-one', '2-Methoxybenzaldehyde', 'Methyl benzoate', 'alpha-Methyl-2-furanacrolein', '3-(3-Furanyl)-2-methyl-2-propenal', 'Phenyl…	C8H8O2	HMDB00209;HMDB02340;HMDB03767;HMDB29635;HMDB29686;HMDB31459;HMDB32400;HMDB32568;HMDB32603;HMDB33128;HMDB33766;HMDB33968;HMDB38176;HMDB40638;HMDB40733;HMDB41485
539	Silver	Polar metabolomics	Ag NP-NM300K 01h	414.27	0.825	0.0477
540	Silver	Polar metabolomics	Ag NP-NM300K 01h	452.87	0.824	0.0314
541	Silver	Polar metabolomics	Ag NP-NM300K 01h	155.032	0.823	0.0331	['Monoethyl malonic acid', 'Ethylmalonic acid', 'Glutaric acid', 'Methylsuccinic acid', 'Dimethylmalonic acid', '2-Acetolactate ', '(S)-2-Acetolactate', '2-C-Methyl-1,4-erythrono-D-lactone', '2-Deoxy-L-ribono-1,4-lactone', '2-Hydroxy-4-oxopentanoic acid', '(S)-Methylbutanethioic acid']	C5H8O4	HMDB00576;HMDB00622;HMDB00661;HMDB01844;HMDB02001;HMDB06833;HMDB06855;HMDB29884;HMDB33958;HMDB40531;HMDB61879	LMFA01170105;LMFA01170119;LMFA01170103;
542	Silver	Polar metabolomics	Ag NP-NM300K 01h	214.006	0.823	0.023
543	Silver	Polar metabolomics	Ag NP-NM300K 01h	231.136	0.823	0.022	['Eremopetasinorol', '(S,E)-Lyratol propanoate', '(5alpha,8beta,9beta)-5,9-Epoxy-3,6-megastigmadien-8-ol', '(5R,6S)-5,6-Epoxy-7-megastigmen-9-one', 'Theaspirone A', '2,2,6,7-Tetramethylbicyclo[4.3.0]nona-1(9),4-diene-7,8-diol', '3-Hydroxy-beta-ionone', 'Acetal R', '5,9:6,9-Diepoxy-3-megastigmene', 'Carvyl propionate', '5,9:6,9-Diepoxy-4-megastigmene', '2,3,5,6,8,8a-Hexahydro-2,5,5,8a-tetramethyl-…	C13H20O2	HMDB29668;HMDB31869;HMDB34672;HMDB34984;HMDB35228;HMDB36686;HMDB36821;HMDB36824;HMDB37776;HMDB38047;HMDB38529;HMDB40233;HMDB41636
544	Silver	Polar metabolomics	Ag NP-NM300K 01h	255.12	0.823	0.023
545	Silver	Polar metabolomics	Ag NP-NM300K 01h	268.233	0.823	0.0325
546	Silver	Polar metabolomics	Ag NP-NM300K 01h	393.298	0.823	0.0193	['Diethylhexyl adipate', 'Dioctyl hexanedioate']	C22H42O4	HMDB40270;HMDB41619
547	Silver	Polar metabolomics	Ag NP-NM300K 01h	442.301	0.823	0.0324
548	Silver	Polar metabolomics	Ag NP-NM300K 01h	177.052	0.822	0.0435	['Hydroxytyrosol', 'Sylvopinol', '4-Hydroxy-3-methoxybenzenemethanol', '2,6-Dimethoxyphenol', 'Propyl 2-furoate', '2-Furanylmethyl propanoate', '3,5-Dimethoxyphenol']	C8H10O3	HMDB05784;HMDB30570;HMDB32012;HMDB34158;HMDB37724;HMDB37728;HMDB59966
549	Silver	Polar metabolomics	Ag NP-NM300K 01h	186.912	0.822	0.029
550	Silver	Polar metabolomics	Ag NP-NM300K 01h	189.089	0.822	0.00567	['Perillic acid', 'Wine lactone', '6-Pentyl-2H-pyran-2-one', '2-tert-Butyl-1,4-benzenediol', '2-Methoxy-4-propylphenol', 'Pentyl 2-furyl ketone', '1,1-Dimethoxy-2-phenylethane', 'alpha-Teresantalic acid', 'Epinepetalactone', '2,4,7-Decatrienoic acid', 'Perilla ketone', 'Marmelolactone A', 'Isomintlactone', '1,4-Epidioxy-p-mentha-2,8-diene', '1,2:3,4-Diepoxy-p-menth-8-ene', '5-Hydroxy-p-mentha-6,8…	C10H14O2	HMDB04586;HMDB29691;HMDB31085;HMDB32062;HMDB32135;HMDB32462;HMDB32615;HMDB34922;HMDB35063;HMDB35235;HMDB35328;HMDB36042;HMDB36084;HMDB36878;HMDB36879;HMDB37011;HMDB37012;HMDB37044;HMDB39382;HMDB40176;HMDB41000;HMDB41584	LMPR0102090041;
551	Silver	Polar metabolomics	Ag NP-NM300K 01h	193.083	0.822	0.0229	['1,4-Ipomeadiol', 'cis-3-Hexenyl pyruvate']	C9H14O3	HMDB30471;HMDB38276
552	Silver	Polar metabolomics	Ag NP-NM300K 01h	251.198	0.822	0.0429	['Myristic acid', '2,6,10-Trimethylundecanoic acid', '12-Methyltridecanoic acid', 'Hexanal octane-1,3-diol acetal', 'Undecanal propyleneglycol acetal', 'Ethyl dodecanoate', 'Heptyl heptanoate', 'Hexyl octanoate', 'Decyl butanoate', '3-Methylbutyl nonanoate', 'Nonyl isovalerate', 'Dodecyl acetate', 'Isobutyl decanoate', '10-Methyltridecanoic acid']	C14H28O2	HMDB00806;HMDB02221;HMDB31072;HMDB32318;HMDB32548;HMDB33788;HMDB34461;HMDB36216;HMDB37312;HMDB37495;HMDB38034;HMDB38969;HMDB59865;HMDB61781	LMFA01010014;LMFA01020285;
553	Silver	Polar metabolomics	Ag NP-NM300K 01h	153.089	0.821	0.0177	['Heptanoic acid', 'Ethyl isovalerate', 'Butyl propionate', 'Isopentyl acetate', '2-Methylhexanoic acid', '5-Methylhexanoic acid', 'cis- and trans-2-Isopropyl-4-methyl-1,3-dioxolane', 'Hexyl formate', 'Ethyl 2-methylbutyrate', '2-Methylbutyl acetate', '2-Methylpropyl propanoate', 'Methyl hexanoate', 'Propyl 2-methylpropanoate', 'Methyl 4-methylpentanoate', 'Isopropyl 2-methylpropanoate', 'Pentyl …	C7H14O2	HMDB00666;HMDB30028;HMDB30052;HMDB31528;HMDB31594;HMDB31595;HMDB32204;HMDB32874;HMDB33745;HMDB34166;HMDB34239;HMDB35238;HMDB36209;HMDB36238;HMDB38227;HMDB39095;HMDB39618;HMDB39619;HMDB40297	LMFA01010007;
554	Silver	Polar metabolomics	Ag NP-NM300K 01h	185.057	0.821	0.0186	['3-Hydroxyisoheptanoic acid', '(+/-)-Ethyl 2-hydroxy-2-methylbutyrate', 'Methyl DL-Leucate', 'Butyl lactate', 'Ethyl 2-hydroxyisovalerate', '3-hydroxyheptanoic acid'];['4,5-Dihydro-1-benzoxepin-3(2H)-one', '3-(4-Methoxyphenyl)-2-propenal', 'Safrole', 'Cassiastearoptene', 'Methyl cinnamate', '3,6-Dimethyl-2(3H)-benzofuranone', 'Cinnamyl formate', 'Allyl benzoate', '1,2-Dihydronaphthalene-1,2-diol…	C7H14O3;C10H10O2	HMDB02207;HMDB32269;HMDB36231;HMDB40254;HMDB59842;HMDB61653;HMDB29714;HMDB32611;HMDB33591;HMDB33830;HMDB33833;HMDB38893;HMDB40577;HMDB40592;HMDB60335
555	Silver	Polar metabolomics	Ag NP-NM300K 01h	211.167	0.821	0.0258	['Altretamine'];['1,1-Dimethoxynonane']	C9H18N6;C11H24O2	HMDB14631;HMDB34151
556	Silver	Polar metabolomics	Ag NP-NM300K 01h	216.071	0.821	0.0146
557	Silver	Polar metabolomics	Ag NP-NM300K 01h	225.11	0.821	0.0481	['Sebacic acid', 'R-2-Hydroxy-3-methylbutanoic acid 3-Methylbutanoyl', 'Oxalic acid dibutyl ester', '2-Ethylsuberic acid', 'Heptylmalonic acid', '3-Methylazelaic acid']	C10H18O4	HMDB00792;HMDB31510;HMDB40196;HMDB59708;HMDB59719;HMDB59754	LMFA01170006;
558	Silver	Polar metabolomics	Ag NP-NM300K 01h	282.167	0.821	0.0367	['Hexanoylcarnitine', 'L-Hexanoylcarnitine']	C13H25NO4	HMDB00705;HMDB00756	LMFA07070001
559	Silver	Polar metabolomics	Ag NP-NM300K 01h	292.269	0.821	0.0444
560	Silver	Polar metabolomics	Ag NP-NM300K 01h	308.264	0.821	0.0258
561	Silver	Polar metabolomics	Ag NP-NM300K 01h	143.068	0.82	0.0249
562	Silver	Polar metabolomics	Ag NP-NM300K 01h	185.094	0.82	0.0159	['(R)-1,3-Octanediol', 'xi-1-Ethoxy-1-butoxyethane', '1-Methoxy-1-pentyloxyethane'];['1-Phenyl-1-pentanone', ""4'-Isopropylacetophenone"", '2-Methyl-4-phenylbutyraldehyde', '3-Methyl-2-phenylbutanal', '4-(4-Methylphenyl)-2-butanone', '4,4alpha,5,6-Tetrahydro-7-methyl-2(3H)-naphthalenone', '4-Isopropylphenylacetaldehyde']	C8H18O2;C11H14O	HMDB29359;HMDB37635;HMDB38679;HMDB31208;HMDB32025;HMDB32415;HMDB33562;HMDB36183;HMDB39803;HMDB41493
563	Silver	Polar metabolomics	Ag NP-NM300K 01h	227.104	0.82	0.0142	['3-Hydroxycapric acid', '(R)-3-Hydroxydecanoic acid', '9-Hydroxydecanoic acid', '(1R,2R,4R,8R)-p-Menthane-2,8,9-triol', '7-Methyl-3-methylene-1,6,7-octanetriol', 'cis-p-Menthane-1,7,8-triol', '2,6-Dimethyl-7-octene-2,3,6-triol', '(1S,2S,4R,8R)-p-Menthane-1,2,9-triol', '2-Hexyl-1,3-dioxan-5-ol', '2-Hexyl-1,3-dioxolane-4-methanol', '(1R,2R,4S)-p-Menthane-1,2,8-triol', 'xi-5-Hydroxydecanoic acid'];…	C10H20O3;C13H16O2	HMDB02203;HMDB10725;HMDB33201;HMDB33574;HMDB33640;HMDB34783;HMDB38186;HMDB39470;HMDB39668;HMDB39669;HMDB39893;HMDB40329;HMDB30770;HMDB30904;HMDB31553;HMDB31661;HMDB33379;HMDB36224;HMDB37628;HMDB37702;HMDB37703;HMDB37721;HMDB41316;HMDB41317	LMFA01050153;LMFA01050245;
564	Silver	Polar metabolomics	Ag NP-NM300K 01h	253.214	0.82	0.0242	['Dodecanal dimethyl acetal', '1,1-Dihexyloxyethane']	C14H30O2	HMDB32246;HMDB38678
565	Silver	Polar metabolomics	Ag NP-NM300K 01h	261.219	0.82	0.0297	['3-Methylcyclopentadecanone', 'Hexadecenal']	C16H30O	HMDB34181;HMDB60482
566	Silver	Polar metabolomics	Ag NP-NM300K 01h	333.965	0.82	0.0236
567	Silver	Polar metabolomics	Ag NP-NM300K 01h	180.136	0.819	0.023
568	Silver	Polar metabolomics	Ag NP-NM300K 01h	193.028	0.819	0.014
569	Silver	Polar metabolomics	Ag NP-NM300K 01h	194.152	0.819	0.0219	['N,2,3-Trimethyl-2-(1-methylethyl)butanamide']	C10H21NO	HMDB36195
570	Silver	Polar metabolomics	Ag NP-NM300K 01h	237.063	0.819	0.0435	['Metharbital']	C9H14N2O3	HMDB14606
571	Silver	Polar metabolomics	Ag NP-NM300K 01h	572.902	0.819	0.0452
572	Silver	Polar metabolomics	Ag NP-NM300K 01h	147.042	0.818	0.022	['4-Methylcatechol', 'Guaiacol', '4-Hydroxybenzyl alcohol', 'Mequinol', '1-(2-Furanyl)-2-propanone', '2-Acetyl-3-methylfuran', '2-Acetyl-5-methylfuran', '4,6-Heptadiyne-1,3-diol', '1-(2-Furanyl)-1-propanone', '2-Hydroxybenzyl alcohol', '3-Hydroxybenzyl alcohol']	C7H8O2	HMDB00873;HMDB01398;HMDB11724;HMDB29696;HMDB32917;HMDB34877;HMDB35226;HMDB38963;HMDB40280;HMDB59709;HMDB59712
573	Silver	Polar metabolomics	Ag NP-NM300K 01h	154.092	0.818	0.0161
574	Silver	Polar metabolomics	Ag NP-NM300K 01h	207.172	0.818	0.0236	['2-Dodecanone', '2-Methylundecanal', '(+/-)-2,4,8-Trimethyl-7-nonen-2-ol', 'Lauric aldehyde']	C12H24O	HMDB31019;HMDB31734;HMDB32543;HMDB33933
575	Silver	Polar metabolomics	Ag NP-NM300K 01h	247.203	0.818	0.0451	['5,10-Pentadecadien-1-ol', '(+/-)-Dihydrofarnesol', '3-Pentadecenal']	C15H28O	HMDB31111;HMDB32218;HMDB40377
576	Silver	Polar metabolomics	Ag NP-NM300K 01h	289.25	0.818	0.0218	['9-Octadecenal', '2-Tetradecylcyclobutanone']	C18H34O	HMDB30965;HMDB37517
577	Silver	Polar metabolomics	Ag NP-NM300K 01h	301.141	0.818	0.0107	['Glyceryl 5-hydroxydecanoate'];['Alpha-CEHC', 'Monoethylhexyl phthalic acid', 'Diisobutyl phthalate', 'Dibutyl phthalate']	C13H26O5;C16H22O4	HMDB32297;HMDB01518;HMDB13248;HMDB13835;HMDB33244
578	Silver	Polar metabolomics	Ag NP-NM300K 01h	329.924	0.818	0.0293
579	Silver	Polar metabolomics	Ag NP-NM300K 01h	483.133	0.818	0.0256
580	Silver	Polar metabolomics	Ag NP-NM300K 01h	194.123	0.817	0.0342
581	Silver	Polar metabolomics	Ag NP-NM300K 01h	226.069	0.817	0.0293
582	Silver	Polar metabolomics	Ag NP-NM300K 01h	305.245	0.817	0.0191	['Oleic acid', 'Elaidic acid', 'Vaccenic acid', '(Z)-13-Octadecenoic acid', 'Ethyl 9-hexadecenoate']	C18H34O2	HMDB00207;HMDB00573;HMDB03231;HMDB41480;HMDB59871	LMFA01030002;LMFA01030076;
583	Silver	Polar metabolomics	Ag NP-NM300K 01h	413.266	0.817	0.0308	['12-Ketodeoxycholic acid', '7-Hydroxy-3-oxocholanoic acid', 'Nutriacholic acid', '7a-Hydroxy-3-oxo-5b-cholanoic acid', ""9'-Carboxy-alpha-chromanol"", ""D8'-Merulinic acid A""]	C24H38O4	HMDB00328;HMDB00460;HMDB00467;HMDB00503;HMDB12866;HMDB41454	LMST04010155;
584	Silver	Polar metabolomics	Ag NP-NM300K 01h	170.042	0.816	0.00855	['L-Glutamic acid', 'N-Methyl-D-aspartic acid', 'N-Acetylserine', 'O-Acetylserine', 'D-Glutamic acid', 'L-4-Hydroxyglutamate semialdehyde', '3-(Carboxymethylamino)propanoic acid', 'DL-Glutamate']	C5H9NO4	HMDB00148;HMDB02393;HMDB02931;HMDB03011;HMDB03339;HMDB06556;HMDB33550;HMDB60475
585	Silver	Polar metabolomics	Ag NP-NM300K 01h	196.102	0.816	0.0367
586	Silver	Polar metabolomics	Ag NP-NM300K 01h	201.052	0.816	0.0399	['2-(1-Ethoxyethoxy)propanoic acid'];['4-Methoxycinnamic acid', '3-(4-Methylphenyl)oxiranecarboxylic acid', '(Z)-10-Hydroxy-8-decene-4,6-diynoic acid', 'Di-alpha-furfuryl ether', '(S)-Isosclerone', '(E)-10-Hydroxy-2-decene-4,6-diynoic acid', '3-(4-Hydroxy-2-methoxyphenyl)-2-propenal']	C7H14O4;C10H10O3	HMDB59918;HMDB02040;HMDB30903;HMDB31055;HMDB33248;HMDB38712;HMDB38965;HMDB39471
587	Silver	Polar metabolomics	Ag NP-NM300K 01h	209.115	0.816	0.0308	['3-Oxodecanoic acid', 'Ethyl (3R,5Z)-3-hydroxy-5-octenoate', '3-Hydroxy-5Z-octenyl acetate', '(1S,2S,4S,5R)-1,8-Epoxy-p-menthane-2,5-diol', '6-Methyl-2-methylene-6-octene-1,3,8-triol', '(1beta,2beta,5beta)-p-Menth-3-ene-1,2,5-triol', '(E)-10-Hydroxy-8-decenoic acid', '6-Hexyl-1,4-dioxan-2-one', '5-Hexyl-1,4-dioxan-2-one', '2-Methylbutyl 3-hydroxy-2-methylidenebutanoate', '3-Methylbutyl 3-hydroxy…	C10H18O3	HMDB10724;HMDB30367;HMDB30369;HMDB33010;HMDB38692;HMDB38978;HMDB39533;HMDB39582;HMDB39587;HMDB40204;HMDB40205;HMDB41376;HMDB41545	LMFA01060028;
588	Silver	Polar metabolomics	Ag NP-NM300K 01h	186.118	0.815	0.0308
589	Silver	Polar metabolomics	Ag NP-NM300K 01h	191.141	0.815	0.0417	['10-Undecenal', '(+/-)-trans- and cis-4,8-Dimethyl-3,7-nonadien-2-ol', '10-Undecen-2-one', '(1R,2R)-1,2,7,7-Tetramethylbicyclo[2.2.1]heptan-2-ol', '9-Undecenal', '2-Undecenal']	C11H20O	HMDB31128;HMDB32238;HMDB33577;HMDB35417;HMDB37807;HMDB40247
590	Silver	Polar metabolomics	Ag NP-NM300K 01h	211.13	0.815	0.0228	['3-Hydroxycapric acid', '(R)-3-Hydroxydecanoic acid', '9-Hydroxydecanoic acid', '(1R,2R,4R,8R)-p-Menthane-2,8,9-triol', '7-Methyl-3-methylene-1,6,7-octanetriol', 'cis-p-Menthane-1,7,8-triol', '2,6-Dimethyl-7-octene-2,3,6-triol', '(1S,2S,4R,8R)-p-Menthane-1,2,9-triol', '2-Hexyl-1,3-dioxan-5-ol', '2-Hexyl-1,3-dioxolane-4-methanol', '(1R,2R,4S)-p-Menthane-1,2,8-triol', 'xi-5-Hydroxydecanoic acid']	C10H20O3	HMDB02203;HMDB10725;HMDB33201;HMDB33574;HMDB33640;HMDB34783;HMDB38186;HMDB39470;HMDB39668;HMDB39669;HMDB39893;HMDB40329	LMFA01050153;LMFA01050245;
591	Silver	Polar metabolomics	Ag NP-NM300K 01h	259.167	0.815	0.0209	['Capsidiol', '(2E,6E)-1-Hydroxy-2,6,10-farnesatrien-9-one', '2-Hydroxyacorenone', 'Acorusnol', 'Epiacorone', '2,6-Di-tert-butyl-4-hydroxymethylphenol', 'Geranyl tiglate', '10alpha-4,5-Seco-11-eudesmene-4,5-dione', '(4S)-Dihydrocurcumenone', 'Calamensesquiterpinenol', 'Curdione', '3-Hydroxy-1,10-bisaboladien-9-one', 'Epilubimin', '7-Hydroxycostol', '(-)-Myrtenyl isovalerate', 'Rishitinone', '4alp…	C15H24O2	HMDB02352;HMDB30891;HMDB30916;HMDB30920;HMDB31348;HMDB32048;HMDB32292;HMDB32681;HMDB33083;HMDB33104;HMDB34714;HMDB34722;HMDB35032;HMDB35040;HMDB35127;HMDB35147;HMDB35301;HMDB35648;HMDB35827;HMDB36446;HMDB36549;HMDB36668;HMDB36680;HMDB36687;HMDB37393;HMDB37906;HMDB38027;HMDB38122;HMDB38144;HMDB38178;HMDB39525;HMDB39688;HMDB40712	LMPR0103250002;
592	Silver	Polar metabolomics	Ag NP-NM300K 01h	302.144	0.815	0.0108
593	Silver	Polar metabolomics	Ag NP-NM300K 01h	336.792	0.815	0.0301
594	Silver	Polar metabolomics	Ag NP-NM300K 01h	291.229	0.814	0.037	['Cyclohexaneundecanoic acid', '(Z)-9-Heptadecenoic acid', '2,4-Heptadecanedione', '10Z-Heptadecenoic acid', '7-Hexadecenoic acid, methyl ester']	C17H32O2	HMDB30997;HMDB31046;HMDB40888;HMDB60038;HMDB61858
595	Silver	Polar metabolomics	Ag NP-NM300K 01h	311.983	0.814	0.00419
596	Silver	Polar metabolomics	Ag NP-NM300K 01h	107.047	0.813	0.0314	['Methyl propenyl ketone', '3-Methyl-2-butenal', 'Cyclopentanone', 'Tiglic aldehyde', '3-Methyl-3-buten-2-one', '2-Pentenal', '4-Penten-2-one', '1-Penten-3-one', '4-Pentenal', 'xi-2,3-Dihydro-3-methylfuran', '2,3-Dihydro-4-methylfuran']	C5H8O	HMDB01184;HMDB12157;HMDB31407;HMDB31512;HMDB31530;HMDB31601;HMDB31606;HMDB31607;HMDB32458;HMDB37788;HMDB40584	LMFA12000028;
597	Silver	Polar metabolomics	Ag NP-NM300K 01h	192.024	0.813	0.00713	['Acetaminophen', '2-Phenylglycine', 'Dopamine quinone', 'Leukoaminochrome', 'Methyl 2-aminobenzoate', '2-(Methylamino)benzoic acid', '3alpha,4,7,7alpha-Tetrahydro-1H-isoindole-1,3(2H)-dione', 'Ethyl nicotinate', '2-Amino-3-methylbenzoate', ""2'-Hydroxyacetanilide""]	C8H9NO2	HMDB01859;HMDB02210;HMDB12219;HMDB12992;HMDB29703;HMDB32609;HMDB33903;HMDB59846;HMDB60680;HMDB61919
598	Silver	Polar metabolomics	Ag NP-NM300K 01h	227.053	0.813	0.0296	['3,5,6-Trihydroxy-5-(hydroxymethyl)-2-methoxy-2-cyclohexen-1-one']	C8H12O6	HMDB41031
599	Silver	Polar metabolomics	Ag NP-NM300K 01h	244.87	0.813	0.0209
600	Silver	Polar metabolomics	Ag NP-NM300K 01h	294.175	0.813	0.0104
601	Silver	Polar metabolomics	Ag NP-NM300K 01h	309.24	0.813	0.0342	['Avocadene', '12-hydroxyheptadecanoic acid']	C17H34O3	HMDB31042;HMDB61663
602	Silver	Polar metabolomics	Ag NP-NM300K 01h	222.118	0.812	0.0337
603	Silver	Polar metabolomics	Ag NP-NM300K 01h	292.232	0.812	0.0471
604	Silver	Polar metabolomics	Ag NP-NM300K 01h	292.873	0.812	0.026
605	Silver	Polar metabolomics	Ag NP-NM300K 01h	352.984	0.812	0.014
606	Silver	Polar metabolomics	Ag NP-NM300K 01h	187.036	0.811	0.0176	['Mevalonic acid', '(R) 2,3-Dihydroxy-3-methylvalerate', 'Glycerol 1-propanoate', '(R)-mevalonate', '(2-Methoxyethoxy)propanoic acid'];['Phenylpyruvic acid', 'm-Coumaric acid', '4-Hydroxycinnamic acid', '2-Hydroxycinnamic acid', 'Enol-phenylpyruvate', 'cis-p-Coumaric acid', 'Coumaric acid']	C6H12O4;C9H8O3	HMDB00227;HMDB12140;HMDB31639;HMDB59629;HMDB59705;HMDB00205;HMDB01713;HMDB02035;HMDB02641;HMDB12225;HMDB30677;HMDB41592
607	Silver	Polar metabolomics	Ag NP-NM300K 01h	235.073	0.81	0.0152	['2,6-Dimethoxy-4-propylphenol', 'Hexyl 2-furoate', 'Isobutyl 2-furanpropionate'];['Benzyl Benzoate', 'Benzoin']	C11H16O3;C14H12O2	HMDB36226;HMDB37725;HMDB37734;HMDB14814;HMDB32039
608	Silver	Polar metabolomics	Ag NP-NM300K 01h	454.867	0.81	0.0239
609	Silver	Polar metabolomics	Ag NP-NM300K 01h	90.9765	0.81	0.0215
610	Silver	Polar metabolomics	Ag NP-NM300K 01h	222.074	0.809	0.022	['2-Acetyl-1,5,6,7-tetrahydro-6-hydroxy-7-(hydroxymethyl)-4H-azepine-4-one']	C9H13NO4	HMDB35177
611	Silver	Polar metabolomics	Ag NP-NM300K 01h	225.125	0.809	0.0266	['Undecanoic acid', '4,6-Dimethylnonanoic acid', 'Hexyl 3-methylbutanoate', '2-Hexyl-4,5-dimethyl-1,3-dioxolane', 'Octanal propyleneglycol acetal', '3-Methylbutyl hexanoate', 'Methyl decanoate', 'Octyl propanoate', '9-Methyldecanoic acid', 'Isobutyl enanthate', 'Heptyl butanoate', '6,6-Dimethoxy-2,5,5-trimethyl-2-hexene', 'Pentyl hexanoate', 'xi-8-Methyldecanoic acid', '7,7-Diethoxy-3-heptene', '…	C11H22O2;C14H18O	HMDB00947;HMDB02373;HMDB32044;HMDB32325;HMDB32448;HMDB33618;HMDB33848;HMDB34134;HMDB34456;HMDB34458;HMDB34460;HMDB36034;HMDB36229;HMDB38237;HMDB38267;HMDB39215;HMDB40171;HMDB40193;HMDB40266;HMDB41559;HMDB59831;HMDB59860;HMDB30838;HMDB31313;HMDB39274;HMDB39356;HMDB61830	LMFA01010011;LMFA01020288;
612	Silver	Polar metabolomics	Ag NP-NM300K 01h	233.188	0.809	0.0462	['Tetradec-2-enal', '(Z)-8-Tetradecenal']	C14H26O	HMDB32525;HMDB32526
613	Silver	Polar metabolomics	Ag NP-NM300K 01h	271.965	0.809	0.0255
614	Silver	Polar metabolomics	Ag NP-NM300K 01h	319.297	0.809	0.023	['Phytol', 'Thromboxane', '(Z)-11-Eicosen-1-ol']	C20H40O	HMDB02019;HMDB03208;HMDB34933	LMPR0104010002;
615	Silver	Polar metabolomics	Ag NP-NM300K 01h	165.052	0.808	0.0208	['5-Ethyl-3-hydroxy-4-methyl-2(5H)-furanone', 'Homofureanol', 'Mesifurane', 'Erinapyrone A', 'Erinapyrone B']	C7H10O3	HMDB33551;HMDB33736;HMDB34230;HMDB41426;HMDB41427
616	Silver	Polar metabolomics	Ag NP-NM300K 01h	171.099	0.808	0.0495
617	Silver	Polar metabolomics	Ag NP-NM300K 01h	181.084	0.808	0.0284	['cis-4-Hydroxycyclohexylacetic acid', 'trans-4-Hydroxycyclohexylacetic acid', '3-Oxooctanoic acid', 'Alpha-Ketooctanoic acid', '6-Ethyl-1-methyl-2,7,8-trioxabicyclo[3.2.1]octane', 'Tetrahydrofurfuryl propionate', 'Ethyl 3-oxohexanoate', '1-Methyl-2-oxopropyl butyrate', '2-Methylpropyl 3-oxobutanoate', '3-Methylbutyl 2-oxopropanoate', 'Butyl acetoacetate', 'Propyl levulinate', '5-Butyl-1,4-dioxan…	C8H14O3	HMDB00451;HMDB00909;HMDB10721;HMDB13211;HMDB30303;HMDB31177;HMDB31307;HMDB36230;HMDB36395;HMDB38305;HMDB40447;HMDB41616;HMDB59938;HMDB59939;HMDB60683;HMDB60685	LMFA01060017;LMFA01060016;
618	Silver	Polar metabolomics	Ag NP-NM300K 01h	193.156	0.808	0.0258	['Undecanal', '6-Undecanone', '10-Undecen-1-ol', '(Z)-3-Methyl-3-decen-1-ol', '1-Menthyl methyl ether', 'trans- and cis-1-Methoxy-1-decene', '2-Undecanone', '2-Undecen-1-ol']	C11H22O	HMDB30941;HMDB30943;HMDB31016;HMDB31064;HMDB32371;HMDB32379;HMDB33713;HMDB34856
619	Silver	Polar metabolomics	Ag NP-NM300K 01h	249.146	0.808	0.035	['Methyl dihydrojasmonate', 'Riesling acetal', '4,5-Dihydrovomifoliol']	C13H22O3	HMDB31740;HMDB37562;HMDB40615
620	Silver	Polar metabolomics	Ag NP-NM300K 01h	143.032	0.807	0.0451	['(S)-3,4-Dihydroxybutyric acid', '2,4-Dihydroxybutanoic acid', '4-Deoxyerythronic acid', '4-Deoxythreonic acid', 'A,b-Dihydroxyisobutyric acid', 'Erythrose', 'L-Erythrulose']	C4H8O4	HMDB00337;HMDB00360;HMDB00498;HMDB02453;HMDB02601;HMDB02649;HMDB06293	LMFA01050385;LMFA01050400;
621	Silver	Polar metabolomics	Ag NP-NM300K 01h	159.078	0.807	0.0218	['2,3,6-Trimethylphenol', 'Benzyl ethyl ether', 'p-Isopropylphenol', '1-Phenyl-1-propanol', '2-Phenyl-1-propanol', '2-Isopropylphenol', '1-Methoxy-2,4-dimethylbenzene', 'Nona-2,4,6-trienal', '2,4,6-Trimethylphenol', '(2-Methoxyethyl)benzene', '2-Propylphenol', '4-Propylphenol', '3-Phenyl-1-propanol', '4-Ethyl-2-methylphenol', '3-Ethyl-5-methylphenol', '3-Ethyl-4-methylphenol', '2-Ethyl-5-methylph…	C9H12O	HMDB29667;HMDB31312;HMDB31446;HMDB31627;HMDB31628;HMDB32029;HMDB32149;HMDB32441;HMDB32544;HMDB32621;HMDB32624;HMDB32625;HMDB33962;HMDB38984;HMDB38985;HMDB38986;HMDB38987;HMDB38988;HMDB39782;HMDB59896
622	Silver	Polar metabolomics	Ag NP-NM300K 01h	165.089	0.807	0.0236	['2-Octenoic acid', 'trans-2-Octenoic acid', '4-ene-Valproic acid', '2-ene-Valproic acid', '(3Z)-2-Propylpent-3-enoic acid', '(3E)-2-Propylpent-3-enoic acid', '2,3-Octanedione', 'Methyl cyclohexanecarboxylate', 'Cyclohexyl acetate', 'Cyclohexaneacetic acid', 'Allyl valerate', 'cis-5-Octenoic acid', 'Ethyl (E)-3-hexenoate', 'Ethyl 5-hexenoate', 'Ethyl 2E-hexenoate', 'Ethyl trans-2-methyl-2-penteno…	C8H14O2	HMDB00392;HMDB01568;HMDB13897;HMDB13902;HMDB13903;HMDB13904;HMDB31293;HMDB31343;HMDB31352;HMDB31403;HMDB32164;HMDB32207;HMDB32266;HMDB32267;HMDB32268;HMDB32278;HMDB32533;HMDB35422;HMDB36212;HMDB36236;HMDB37622;HMDB37624;HMDB37630;HMDB38036;HMDB38310;HMDB39793;HMDB39872;HMDB40212;HMDB40215;HMDB59908	LMFA01030017;LMFA01030018;
623	Silver	Polar metabolomics	Ag NP-NM300K 01h	237.146	0.807	0.0177	['3-Oxododecanoic acid', '4-Acetoxy-2-hexyltetrahydrofuran']	C12H22O3	HMDB10727;HMDB37398	LMFA01060091;
624	Silver	Polar metabolomics	Ag NP-NM300K 01h	263.198	0.807	0.0199	['9-Pentadecenoic acid', 'Isobutyl 10-undecenoate', 'Exaltolide', 'Butyl undecylenate', 'Rhodinyl isovalerate', 'Menthyl isovalerate', 'Citronellyl pentanoate', 'Citronellyl isovalerate', 'Auberganol', '15,5-Farnesanolide']	C15H28O2	HMDB29765;HMDB32347;HMDB34455;HMDB36426;HMDB37190;HMDB37211;HMDB37229;HMDB38954;HMDB39715;HMDB40997
625	Silver	Polar metabolomics	Ag NP-NM300K 01h	264.201	0.807	0.0269
626	Silver	Polar metabolomics	Ag NP-NM300K 01h	288.897	0.807	0.0486
627	Silver	Polar metabolomics	Ag NP-NM300K 01h	331.92	0.807	0.0308
628	Silver	Polar metabolomics	Ag NP-NM300K 01h	336.834	0.807	0.0361
629	Silver	Polar metabolomics	Ag NP-NM300K 01h	151.037	0.806	0.0195	['Osmundalactone', '3-Hydroxy-4,5-dimethyl-2(5H)-furanone', '2-Ethyl-3,4-dihydroxyfuran', 'L-erythro-5-(1-Hydroxyethyl)-2(5H)-furanone', '5,6-Dihydro-4-methoxy-2H-pyran-2-one', 'xi-5-Acetyltetrahydro-2(3H)-furanone', '2,7-Oxepanedione']	C6H8O3	HMDB31303;HMDB31306;HMDB31847;HMDB33285;HMDB33517;HMDB38072;HMDB40732
630	Silver	Polar metabolomics	Ag NP-NM300K 01h	162.061	0.806	0.0183
631	Silver	Polar metabolomics	Ag NP-NM300K 01h	166.092	0.806	0.0314
632	Silver	Polar metabolomics	Ag NP-NM300K 01h	200.097	0.806	0.0282
633	Silver	Polar metabolomics	Ag NP-NM300K 01h	253.105	0.806	0.0367
634	Silver	Polar metabolomics	Ag NP-NM300K 01h	286.089	0.806	0.0425
635	Silver	Polar metabolomics	Ag NP-NM300K 01h	350.987	0.806	0.0123
636	Silver	Polar metabolomics	Ag NP-NM300K 01h	176.113	0.805	0.0444
637	Silver	Polar metabolomics	Ag NP-NM300K 01h	193.047	0.805	0.0155	['3,4-Dihydroxyphenylglycol', 'Furaneol acetate', 'Herierin III', 'Herierin IV', '3,4-Methyleneadipic acid']	C8H10O4	HMDB00318;HMDB32966;HMDB38760;HMDB38761;HMDB59756
638	Silver	Polar metabolomics	Ag NP-NM300K 01h	197.042	0.805	0.0235	['Shikimic acid', '2-Isopropyl-3-oxosuccinate', 'Dimethyl 2-oxoglutarate']	C7H10O5	HMDB03070;HMDB12149;HMDB61388
639	Silver	Polar metabolomics	Ag NP-NM300K 01h	456.799	0.805	0.0249
640	Silver	Polar metabolomics	Ag NP-NM300K 01h	173.094	0.804	0.0262	['Thymol', 'Perillyl aldehyde', '(+)-(S)-Carvone', '2-(4-Methylphenyl)-2-propanol', '2-Methyl-1-phenyl-2-propanol', '4-Phenyl-2-butanol', 'Cuminyl alcohol', '4-tert-Butylphenol', '2-trans-4-trans-7-cis-Decatrienal', '1-Methoxy-4-propylbenzene', '(2E,4Z,7Z)-2,4,7-Decatrienal', '2-(4-Methylphenyl)-1-propanol', 'Teresantalal', '(R)-Carvone', '2,6,6-Trimethyl-1,4-cyclohexadiene-1-carboxaldehyde', 'My…	C10H14O	HMDB01878;HMDB03647;HMDB04487;HMDB29652;HMDB31570;HMDB31613;HMDB31817;HMDB32063;HMDB32213;HMDB32626;HMDB33544;HMDB34846;HMDB34921;HMDB35089;HMDB35172;HMDB35250;HMDB35591;HMDB35761;HMDB35770;HMDB35824;HMDB36061;HMDB36070;HMDB36089;HMDB36999;HMDB37561;HMDB38913;HMDB61788	LMPR0102090029;LMPR0102090010;
641	Silver	Polar metabolomics	Ag NP-NM300K 01h	205.084	0.804	0.0156	['Amyl 2-furoate', '4-Ethyl-2,6-dimethoxyphenol', 'Verimol J', '4-(Ethoxymethyl)-2-methoxyphenol', 'Furfuryl pentanoate', 'Peperinic acid', '2-Ethoxy-4-(methoxymethyl)phenol', 'Furfuryl isovalerate', 'Isoamyl 2-furoate']	C10H14O3	HMDB29456;HMDB33394;HMDB36522;HMDB37641;HMDB37727;HMDB38181;HMDB38354;HMDB39874;HMDB59891
642	Silver	Polar metabolomics	Ag NP-NM300K 01h	221.078	0.804	0.0155	['Guaifenesin', '5-(3E-Pentenyl)tetrahydro-2-oxo-3-furancarboxylic acid', '3-(4-Hydroxy-3-methoxyphenyl)-1,2-propanediol', '(2E,4E)-2,7-Dimethyl-2,4-octadienedioic acid', '3,4-Methylene suberic acid', '2,3-Methylene suberic acid']	C10H14O4	HMDB04998;HMDB30991;HMDB33093;HMDB34099;HMDB59768;HMDB59779
643	Silver	Polar metabolomics	Ag NP-NM300K 01h	282.248	0.804	0.019
644	Silver	Polar metabolomics	Ag NP-NM300K 01h	354.981	0.804	0.0231
645	Silver	Polar metabolomics	Ag NP-NM300K 01h	469.083	0.804	0.0155
646	Silver	Polar metabolomics	Ag NP-NM300K 01h	172.066	0.803	0.0102
647	Silver	Polar metabolomics	Ag NP-NM300K 01h	228.129	0.803	0.0177
648	Silver	Polar metabolomics	Ag NP-NM300K 01h	240.201	0.803	0.0197
649	Silver	Polar metabolomics	Ag NP-NM300K 01h	198.074	0.802	0.0262	['N-Carboxyethyl-g-aminobutyric acid', '2-Aminoheptanedioic acid', 'Calystegine B5', 'Calystegine B2']	C7H13NO4	HMDB02201;HMDB34252;HMDB36383;HMDB38594
650	Silver	Polar metabolomics	Ag NP-NM300K 01h	217.021	0.802	0.0284
651	Silver	Polar metabolomics	Ag NP-NM300K 01h	285.218	0.802	0.0233	['6,10,14-Trimethyl-5,9,13-pentadecatrien-2-one', '2-(5,8-Tetradecadienyl)cyclobutanone']	C18H30O	HMDB34495;HMDB37519
652	Silver	Polar metabolomics	Ag NP-NM300K 01h	293.172	0.802	0.0183	['Ethylene brassylate']	C15H26O4	HMDB40459
653	Silver	Polar metabolomics	Ag NP-NM300K 01h	307.261	0.802	0.0202	['Stearic acid', 'Ethyl hexadecanoate', '16-Methylheptadecanoic acid', 'Hexyl dodecanoate']	C18H36O2	HMDB00827;HMDB29811;HMDB31066;HMDB61946	LMFA01010018;
654	Silver	Polar metabolomics	Ag NP-NM300K 01h	459.248	0.802	0.0218	['LPA(0:0/18:1(9Z))', 'LPA(18:1(9Z)/0:0)', 'DHAP(18:0)']	C21H41O7P	HMDB07851;HMDB07855;HMDB11133	LMGP10050014;LMGP10050008;
655	Silver	Polar metabolomics	Ag NP-NM300K 01h	125.046	0.801	0.0333
656	Silver	Polar metabolomics	Ag NP-NM300K 01h	158.051	0.801	0.0273
657	Silver	Polar metabolomics	Ag NP-NM300K 01h	164.068	0.801	0.0486	['Ethosuximide', 'L-Hypoglycin A', 'Arecaidine']	C7H11NO2	HMDB14731;HMDB29427;HMDB30352
658	Silver	Polar metabolomics	Ag NP-NM300K 01h	182.087	0.801	0.0325
659	Silver	Polar metabolomics	Ag NP-NM300K 01h	348.99	0.801	0.0192
660	Silver	Polar metabolomics	Ag NP-NM300K 01h	137.057	0.8	0.0259	['Delta-Hexanolactone', 'Gamma-Caprolactone', 'trans-Hex-2-enoic acid', 'Allyl propionate', '2-Methyl-4-pentenoic acid', '2,3-Hexanedione', '3,4-Hexanedione', '3-Hexenoic acid', '4-Methyl-2,3-pentanedione', '2-Methyl-2-pentenoic acid', '4-Methyl-2-pentenoic acid', '2-Methyl-3-pentenoic acid', 'Prenyl formate', '5-Oxohexanal', 'Ethyl crotonate', 'Methyl 4-pentenoate', 'epsilon-Caprolactone', 'Dihy…	C6H10O2	HMDB00453;HMDB03843;HMDB10719;HMDB29487;HMDB31158;HMDB31491;HMDB31492;HMDB31501;HMDB31559;HMDB31560;HMDB31561;HMDB31562;HMDB32490;HMDB33568;HMDB39581;HMDB40328;HMDB60476;HMDB61929	LMFA07040010;LMFA01030008;
661	Silver	Polar metabolomics	Ag NP-NM300K 01h	147.005	0.8	0.0188	['2,2-Dihydroperoxypropane']	C3H8O4	HMDB34260
662	Silver	Polar metabolomics	Ag NP-NM300K 01h	179.104	0.8	0.023	['4-Hydroxynonenal', '2,4-Nonanedione', '2-Nonenoic acid', '6-Butyltetrahydro-2H-pyran-2-one', 'Dihydro-5-pentyl-2(3H)-furanone', 'cis-Ethyl 4-heptenoate', 'Hept-trans-2-en-1-yl acetate', 'Methyl 2-octenoate', 'Prenyl isobutyrate', 'Ethyl cyclohexanecarboxylate', '4-Oxononanal', 'Quercuslactone a', '2-Propenyl 2-ethylbutanoate', 'Cyclohexyl propionate', '2-Hydroxy-2,6,6-trimethylcyclohexanone', '…	C9H16O2	HMDB04362;HMDB31263;HMDB31271;HMDB31514;HMDB31531;HMDB32265;HMDB32307;HMDB32413;HMDB32491;HMDB33167;HMDB34716;HMDB35307;HMDB36208;HMDB36222;HMDB37023;HMDB37496;HMDB37618;HMDB37629;HMDB38272;HMDB38275;HMDB39736;HMDB39794;HMDB40210;HMDB59728;HMDB59817;HMDB59840;HMDB59894;HMDB60286	LMFA06000051;
663	Silver	Polar metabolomics	Ag NP-NM300K 01h	226.89	0.8	0.0325
664	Silver	Polar metabolomics	Ag NP-NM300K 01h	121.026	0.799	0.023	['2-Furanmethanol', '5-Methyl-2(3H)-furanone', '5-Hydroxy-4-pentenoic acid d-lactone']	C5H6O2	HMDB13742;HMDB29609;HMDB40145
665	Silver	Polar metabolomics	Ag NP-NM300K 01h	138.061	0.799	0.0207
666	Silver	Polar metabolomics	Ag NP-NM300K 01h	159.027	0.799	0.014	['Erythronic acid', 'Threonic acid']	C4H8O5	HMDB00613;HMDB00943
667	Silver	Polar metabolomics	Ag NP-NM300K 01h	199.094	0.799	0.00369
668	Silver	Polar metabolomics	Ag NP-NM300K 01h	223.167	0.799	0.023	['Dodecanoic acid', 'Ethyl decanoate', '2-Heptyl butyrate', 'Nonanal propyleneglycol acetal', 'Hexyl hexanoate', 'Isopropyl nonanoate', 'Octyl butanoate', 'Octyl 2-methylpropanoate', '(R)-Dihydrocitronellol acetate', 'Pentyl heptanoate', 'Decyl acetate', 'Isobutyl octanoate']	C12H24O2	HMDB00638;HMDB30998;HMDB32310;HMDB32440;HMDB33619;HMDB34128;HMDB34136;HMDB34137;HMDB35410;HMDB36225;HMDB40166;HMDB59868	LMFA01010012;
669	Silver	Polar metabolomics	Ag NP-NM300K 01h	227.089	0.799	0.0202
670	Silver	Polar metabolomics	Ag NP-NM300K 01h	305.281	0.799	0.0111	['Pristanal', '2-Nonadecanone']	C19H38O	HMDB01958;HMDB61862	LMPR0104010012;
671	Silver	Polar metabolomics	Ag NP-NM300K 01h	135.042	0.798	0.0228	['trans-1,2-Dihydrobenzene-1,2-diol', '(2E,4E)-2,4-Hexadienoic acid', '1,2-Cyclohexanedione', '3-Methyl-1,2-cyclopentanedione', '(E)-4-Oxo-2-hexen-1-al', '2,5-Dimethyl-3(2H)-furanone', 'Syoyualdehyde', '2-(Methoxymethyl)furan', 'xi-3,5-Dimethyl-2(5H)-furanone', '5,5-Dimethyl-2(5H)-furanone']	C6H8O2	HMDB01164;HMDB29581;HMDB31344;HMDB31543;HMDB31759;HMDB32233;HMDB33569;HMDB34247;HMDB39778;HMDB40260
672	Silver	Polar metabolomics	Ag NP-NM300K 01h	178.092	0.798	0.0212
673	Silver	Polar metabolomics	Ag NP-NM300K 01h	219.048	0.798	0.0155	['Galactonic acid', 'Gluconic acid', 'Gulonic acid']	C6H12O7	HMDB00565;HMDB00625;HMDB03290
674	Silver	Polar metabolomics	Ag NP-NM300K 01h	219.172	0.798	0.0218	['(Z)-4-Dodecenal', '4-(2,6,6-Trimethyl-1-cyclohexenyl)-2-butanol', '2-Tridecenal', '2-Methylcyclododecanone', 'Dihydrogeranylacetone']	C13H24O	HMDB32247;HMDB36172;HMDB37275;HMDB41404;HMDB41490
675	Silver	Polar metabolomics	Ag NP-NM300K 01h	236.134	0.798	0.0191
676	Silver	Polar metabolomics	Ag NP-NM300K 01h	290.001	0.798	0.00113
677	Silver	Polar metabolomics	Ag NP-NM300K 01h	133.026	0.797	0.0327	['Pyrocatechol', 'Hydroquinone', '(E,E)-2,4-Hexadienedial', '1,3-Benzenediol', '5-Methyl-2-furancarboxaldehyde', '2-Acetylfuran']	C6H6O2	HMDB00957;HMDB02434;HMDB31180;HMDB32037;HMDB33002;HMDB33127
678	Silver	Polar metabolomics	Ag NP-NM300K 01h	219.099	0.797	0.0177	['2,6-Dimethoxy-4-propylphenol', 'Hexyl 2-furoate', 'Isobutyl 2-furanpropionate']	C11H16O3	HMDB36226;HMDB37725;HMDB37734
679	Silver	Polar metabolomics	Ag NP-NM300K 01h	281.187	0.797	0.0236	['Pentadecanoic acid', 'Methyl tetradecanoate', 'Dodecyl propionate', 'Hexyl nonanoate', 'Heptyl octanoate', 'Octyl heptanoate', 'Pentyl decanoate', '3-Methylbutyl decanoate', '7(14)-Farnesene-9,12-diol', '2,6,10-Trimethyldodecanoic acid', 'Isopropyl_laurate', 'Ethyl tridecanoate', '13-Methylmyristic acid'];['2-Acetyl-3,5,5,6,8,8-hexamethyl-5,6,7,8- tetrahydronaphthalene']	C15H30O2;C18H26O	HMDB00826;HMDB30469;HMDB32250;HMDB32328;HMDB36218;HMDB36220;HMDB37306;HMDB38907;HMDB40998;HMDB41588;HMDB59820;HMDB59833;HMDB61707;HMDB61860	LMFA01010015;
680	Silver	Polar metabolomics	Ag NP-NM300K 01h	350.832	0.797	0.0222
681	Silver	Polar metabolomics	Ag NP-NM300K 01h	161.094	0.796	0.0361	['2-Pentylfuran', '2-Pentylfuran n', '(3Z,6Z)-3,6-Nonadienal', '3,5,5-Trimethyl-2-cyclohexen-1-one', '(2E,6E)-2,6-Nonadienal', '2,4-Nonadienal', '4-Acetyl-1-methylcyclohexene', 'Violet-leaf aldehyde', '5-Isopropylbicyclo[3.1.0]hexan-2-one', '(R)-Cryptone', 'Pulegenone', 'exo-5,6-Dimethylbicyclo[2.2.1]hept-5-en-2-ol', 'exo-2-Methyl-3-methylenebicyclo[2.2.1]heptan-2-ol', '3,5,5-Trimethyl-3-cyclohex…	C9H14O	HMDB13824;HMDB31084;HMDB31152;HMDB31195;HMDB31261;HMDB31685;HMDB33434;HMDB33857;HMDB35229;HMDB35929;HMDB36069;HMDB36091;HMDB36092;HMDB40338
682	Silver	Polar metabolomics	Ag NP-NM300K 01h	171.046	0.796	0.00636
683	Silver	Polar metabolomics	Ag NP-NM300K 01h	352.829	0.796	0.0293
684	Silver	Polar metabolomics	Ag NP-NM300K 01h	85.026	0.796	0.0459	['Dimethyl peroxide', 'Ethylene oxide/propylene oxide copolymer (avg m w 9,760 - 13,200)']	C2H6O2	HMDB31430;HMDB32262
685	Silver	Polar metabolomics	Ag NP-NM300K 01h	151.073	0.795	0.0228	['1,3-Diacetylpropane', 'Isopentenyl acetate', '1-Methoxy-3-methylene-2-pentanone', '4-Methyl-5-hexanolide', 'Cyclohexanecarboxylic acid', 'Cyclohexyl formate', '2,3-Heptanedione', '3,4-Heptanedione', '2-Heptenoic acid', 'Methyl 2E-hexenoate', 'Methyl (Z)-3-hexenoate', '5-Methyl-2,3-hexanedione', 'Ethyl 4-pentenoate', 'Dihydro-5-propyl-2(3H)-furanone', '3-Methyl-3-butenyl acetate', '4-Pentenyl ac…	C7H12O2	HMDB29165;HMDB29314;HMDB30330;HMDB31174;HMDB31342;HMDB31351;HMDB31476;HMDB31477;HMDB31484;HMDB31500;HMDB31504;HMDB31593;HMDB31603;HMDB31681;HMDB32391;HMDB32460;HMDB33793;HMDB38271;HMDB38962;HMDB39819;HMDB40214;HMDB40591
686	Silver	Polar metabolomics	Ag NP-NM300K 01h	161.057	0.795	0.0201	['Tyrosol', '3-Acetyl-2,5-dimethylfuran', '1,4-Dimethoxybenzene', '1,3-Dimethoxybenzene', '4-Ethoxyphenol', '2-Methoxy-4-methylphenol', '2,6-Dimethyl-1,4-benzenediol', '1,2-Dimethoxybenzene', '2-Acetyl-3,5-dimethylfuran', '1-(2-Furyl)butan-3-one', '4-Methoxybenzyl alcohol', '1-(2-Furanyl)-1-butanone', '4-Ethyl-1,2-benzenediol', '3-Ethyl-1,2-benzenediol', '2-Phenoxyethanol']	C8H10O2	HMDB04284;HMDB29563;HMDB29671;HMDB29672;HMDB32036;HMDB32136;HMDB32137;HMDB32139;HMDB32159;HMDB32290;HMDB34241;HMDB39802;HMDB40174;HMDB40177;HMDB41607
687	Silver	Polar metabolomics	Ag NP-NM300K 01h	221.188	0.795	0.0184	['Tridecanal', '2-Tridecanone']	C13H26O	HMDB30928;HMDB34148
688	Silver	Polar metabolomics	Ag NP-NM300K 01h	311.162	0.795	0.0204	['7(14)-Bisabolene-2,3,10,11-tetrol'];['Estriol', '2-Hydroxyestradiol', '16b-Hydroxyestradiol', '17-Epiestriol', '16,17-Epiestriol', '4-Hydroxyestradiol', 'O-Geranylvanillin', '2-Polyprenyl-3-methyl-6-methoxy-1,4-benzoquinone', '4-hydroxystradiol']	C15H28O4;C18H24O3	HMDB35918;HMDB00153;HMDB00338;HMDB00347;HMDB00356;HMDB00431;HMDB05896;HMDB40864;HMDB60353;HMDB60999	LMST02010003;LMST02010027;LMST02010006;LMST02010045;
689	Silver	Polar metabolomics	Ag NP-NM300K 01h	97.026	0.795	0.0188	['Propionic acid', 'Lactaldehyde', '3-Hydroxypropanal', 'D-Lactaldehyde', 'Hydroxyacetone', 'Ethyl formate', 'Methyl acetate']	C3H6O2	HMDB00237;HMDB03052;HMDB03453;HMDB06458;HMDB06961;HMDB31229;HMDB31523	LMFA01010003;
690	Silver	Polar metabolomics	Ag NP-NM300K 01h	205.06	0.794	0.0393	['Cyromazine']	C6H10N6	HMDB29862
691	Silver	Polar metabolomics	Ag NP-NM300K 01h	241.029	0.794	0.0183
692	Silver	Polar metabolomics	Ag NP-NM300K 01h	244.139	0.794	0.0104
693	Silver	Polar metabolomics	Ag NP-NM300K 01h	249.983	0.794	0.00113
694	Silver	Polar metabolomics	Ag NP-NM300K 01h	252.129	0.794	0.0435
695	Silver	Polar metabolomics	Ag NP-NM300K 01h	267.193	0.794	0.0105	['2-Hydroxymyristic acid', '(R)-3-Hydroxy-tetradecanoic acid', '3-(L-Menthoxy)-2-methylpropane-1,2-diol', 'Ethyl 3-hydroxydodecanoate', '3-hydroxytetradecanoic acid']	C14H28O3	HMDB02261;HMDB10731;HMDB32417;HMDB59850;HMDB61656	LMFA01050322;
696	Silver	Polar metabolomics	Ag NP-NM300K 01h	191.068	0.793	0.0175	['2,6-Dimethoxy-4-methylphenol', '4-Ipomeanol', '1-Ipomeanol', 'Epoxyoxophorone', 'Ethyl 2-furanpropionate', '2-Furanylmethyl butanoate', '(4-Hydroxy-3-methoxyphenyl)ethanol', '1,3,5-Trimethoxybenzene']	C9H12O3	HMDB29680;HMDB30472;HMDB30473;HMDB32252;HMDB32921;HMDB37729;HMDB38925;HMDB59963
697	Silver	Polar metabolomics	Ag NP-NM300K 01h	193.12	0.793	0.0209	['cis-4-Decenoic acid', 'trans-Dec-2-enoic acid', '8-Methylnonenoate', '5Z-Octenyl acetate', 'Methyl (xi)-3-nonenoate', '3-Decenoic acid', '9-Decenoic acid', '2-Octenyl acetate', 'Cyclohexylethyl acetate', 'Linalool oxide (trans-pyranoid)', 'Linalool oxide III', '4-Hydroxy-2,6-dimethyl-7-octen-3-one', 'Ethyl 3-octenoate', '2-Methylbutyl 3-methyl-2-butenoate', '1-Octen-3-yl acetate', '6-Decanolide…	C10H18O2	HMDB04980;HMDB10726;HMDB12183;HMDB29358;HMDB29859;HMDB31002;HMDB31003;HMDB31297;HMDB31362;HMDB31440;HMDB31441;HMDB32119;HMDB32275;HMDB32393;HMDB32452;HMDB33203;HMDB33377;HMDB34427;HMDB34581;HMDB34880;HMDB35122;HMDB35365;HMDB35837;HMDB35839;HMDB35907;HMDB36099;HMDB36211;HMDB36990;HMDB36992;HMDB37021;HMDB37116;HMDB37217;HMDB37497;HMDB37632;HMDB38744;HMDB39149;HMDB39768;HMDB39795;HMDB40194;HMDB40208…	LMFA01030199;LMFA01030029;
698	Silver	Polar metabolomics	Ag NP-NM300K 01h	215.016	0.793	0.0257	['Citric acid', 'Isocitric acid', 'D-threo-Isocitric acid', 'Diketogulonic acid', '2,3-Diketo-L-gulonate', '(1R,2R)-Isocitric acid', 'D-Glucaro-1,4-lactone']	C6H8O7	HMDB00094;HMDB00193;HMDB01874;HMDB05971;HMDB06511;HMDB33717;HMDB41862	LMFA01060195;
699	Silver	Polar metabolomics	Ag NP-NM300K 01h	287.146	0.793	0.0268	['Hexyl glucoside']	C12H24O6	HMDB31688
700	Silver	Polar metabolomics	Ag NP-NM300K 01h	294.212	0.793	0.0293
701	Silver	Polar metabolomics	Ag NP-NM300K 01h	303.981	0.793	0.023
702	Silver	Polar metabolomics	Ag NP-NM300K 01h	306.823	0.793	0.0314
703	Silver	Polar metabolomics	Ag NP-NM300K 01h	315.178	0.793	0.0215	['(S)-3-Octanol glucoside']	C14H28O6	HMDB32958
704	Silver	Polar metabolomics	Ag NP-NM300K 01h	469.329	0.793	0.0207	[""13'-Carboxy-gamma-tocopherol"", '(3beta,5alpha,6beta,7alpha,22E,24R)-Ergosta-8,22-diene-3,5,6,7-tetrol', '(3beta,5alpha,6alpha,9alpha,22E,24R)-Ergosta-7,22-diene-3,5,6,9-tetrol', '3,5,9-Trihydroxyergost-7-en-6-one', 'Secasterone', '3-Dehydroteasterone']	C28H46O4	HMDB12557;HMDB32107;HMDB32123;HMDB32875;HMDB40999;HMDB41527
705	Silver	Polar metabolomics	Ag NP-NM300K 01h	120.042	0.792	0.0299	['1-Cyano-2-hydroxy-3-butene', '2,4-Dimethyloxazole', '2,5-Dimethyloxazole', '4,5-Dimethyloxazole']	C5H7NO	HMDB31339;HMDB32968;HMDB32969;HMDB32970
706	Silver	Polar metabolomics	Ag NP-NM300K 01h	202.055	0.792	0.0295
707	Silver	Polar metabolomics	Ag NP-NM300K 01h	294.956	0.792	0.0123
708	Silver	Polar metabolomics	Ag NP-NM300K 01h	304.826	0.792	0.023
709	Silver	Polar metabolomics	Ag NP-NM300K 01h	307.188	0.792	0.023
710	Silver	Polar metabolomics	Ag NP-NM300K 01h	352.877	0.792	0.0256
711	Silver	Polar metabolomics	Ag NP-NM300K 01h	135.078	0.791	0.0218	['(Z)-4-Heptenal', '3-Hepten-2-one', '(E)-4-Hepten-2-one', '2-Hepten-4-one', '2-Methylcyclohexanone', '4-Methylcyclohexanone', '5-Methyl-3-hexen-2-one', '5-Methyl-5-hexen-2-one', 'trans-2-trans-4-Heptadien-1-ol', '(R)-3-Methylcyclohexanone', '(2E)-2-Heptenal', 'xi-3-Methyl-3-cyclohexen-1-ol', '2,5-Heptadien-1-ol']	C7H12O	HMDB31483;HMDB31486;HMDB31487;HMDB31488;HMDB31539;HMDB31540;HMDB31550;HMDB31551;HMDB32301;HMDB33667;HMDB33827;HMDB34372;HMDB40339
712	Silver	Polar metabolomics	Ag NP-NM300K 01h	177.089	0.791	0.0218	['Methyl 2-octynoate', '2,4-Hexadienyl propionate', '2-Nonenoic acid gamma-lactone', '(E)-2,6-Dimethyl-2,5-heptadienoic acid', '3,5,5-Trimethyl-1,2-cyclohexanedione', 'Enol-3,5,5-Trimethyl-1,2-cyclohexanedione', 'Octahydro-2H-1-benzopyran-2-one', 'Allyl hexenoate', 'xi-2,2,6-Trimethyl-1,4-cyclohexanedione', 'Anapear', '4-Oxo-2-nonenal']	C9H14O2	HMDB31302;HMDB32314;HMDB32442;HMDB35135;HMDB36177;HMDB36239;HMDB37276;HMDB38268;HMDB38697;HMDB40285;HMDB60285
713	Silver	Polar metabolomics	Ag NP-NM300K 01h	279.229	0.791	0.00531	['Palmitic acid', 'Trimethyltridecanoic acid', 'Isopalmitic acid', 'Butyl dodecanoate', 'Dodecyl butyrate', 'Hexyl decanoate', 'Octyl octanoate', 'Ethyl tetradecanoate', 'Dodecyl 2-methylpropanoate']	C16H32O2	HMDB00220;HMDB02396;HMDB31068;HMDB32065;HMDB32249;HMDB32324;HMDB33166;HMDB34153;HMDB36210	LMFA01010001;LMFA01020249;
714	Silver	Polar metabolomics	Ag NP-NM300K 01h	316.939	0.791	0.00525
715	Silver	Polar metabolomics	Ag NP-NM300K 01h	469.099	0.791	0.0201
716	Silver	Polar metabolomics	Ag NP-NM300K 01h	92.9808	0.791	0.0224
717	Silver	Polar metabolomics	Ag NP-NM300K 01h	99.0416	0.791	0.0496	['Propylene glycol', '(S)-Propane-1,2-diol']	C3H8O2	HMDB01881;HMDB06213
718	Silver	Polar metabolomics	Ag NP-NM300K 01h	115.037	0.79	0.0185	['Glycerol']	C3H8O3	HMDB00131
719	Silver	Polar metabolomics	Ag NP-NM300K 01h	268.123	0.79	0.0441
720	Silver	Polar metabolomics	Ag NP-NM300K 01h	348.835	0.79	0.0197
721	Silver	Polar metabolomics	Ag NP-NM300K 01h	107.01	0.789	0.0223	['4-Hydroxy-2-butenoic acid gamma-lactone']	C4H4O2	HMDB32330
722	Silver	Polar metabolomics	Ag NP-NM300K 01h	587.924	0.789	0.0367
723	Silver	Polar metabolomics	Ag NP-NM300K 01h	152.076	0.788	0.0236
724	Silver	Polar metabolomics	Ag NP-NM300K 01h	229.06	0.788	0.0101
725	Silver	Polar metabolomics	Ag NP-NM300K 01h	258.98	0.788	0.014
726	Silver	Polar metabolomics	Ag NP-NM300K 01h	277.25	0.788	0.021	['Heptadecanal', '2-Heptadecanone']	C17H34O	HMDB31039;HMDB31040
727	Silver	Polar metabolomics	Ag NP-NM300K 01h	278.923	0.788	0.0201
728	Silver	Polar metabolomics	Ag NP-NM300K 01h	147.078	0.787	0.0176	['2,3-Dimethyl-2-cyclohexen-1-one', '6-Methyl-3,5-heptadien-2-one', '(E,E)-2,4-Octadienal', 'trans, trans-3,5-Octadien-2-one', '1,5-Octadien-3-one', '2-Isopropyl-5-methylfuran', '(E,E)-2,6-Octadienal', '3,5,5-Trimethyl-2-cyclopenten-1-one', '2-Butylfuran', 'Methyl-1-cyclopenten-1-yl)-ethanone']	C8H12O	HMDB31414;HMDB31582;HMDB31686;HMDB32446;HMDB32447;HMDB33238;HMDB39844;HMDB40246;HMDB40272;HMDB61898
729	Silver	Polar metabolomics	Ag NP-NM300K 01h	165.125	0.787	0.0228	['2-Methyl-4-heptanone', 'Dihydroisophorol', '(Z)-3-Nonen-1-ol', '2-Nonanone', '3-Nonanone', 'Amyl propyl ketone', '2,6-Dimethyl-4-heptanone', '2-Methyloctanal', '3,5,5-Trimethylhexanal', '1-Nonen-3-ol', '(Z)-6-Nonen-1-ol', '2-Nonen-1-ol', '(Z)-2-Nonen-1-ol', '(E)-3-Nonen-1-ol', 'Nonanal', '(E)-6-Nonenol']	C9H18O	HMDB13821;HMDB29557;HMDB30959;HMDB31266;HMDB31267;HMDB31268;HMDB31417;HMDB31684;HMDB31730;HMDB34152;HMDB40581;HMDB41498;HMDB41499;HMDB41601;HMDB59835;HMDB59887
730	Silver	Polar metabolomics	Ag NP-NM300K 01h	224.17	0.787	0.00771
731	Silver	Polar metabolomics	Ag NP-NM300K 01h	246.867	0.787	0.0101
732	Silver	Polar metabolomics	Ag NP-NM300K 01h	108.042	0.786	0.0333	['2-Pyrrolidinone', 'Acetone cyanohydrin']	C4H7NO	HMDB02039;HMDB60427
733	Silver	Polar metabolomics	Ag NP-NM300K 01h	288.86	0.786	0.0314
734	Silver	Polar metabolomics	Ag NP-NM300K 01h	235.203	0.785	0.0218	['2-Tetradecanone', '12-Methyltridecanal', 'Tetradecanal']	C14H28O	HMDB30924;HMDB32432;HMDB34283
735	Silver	Polar metabolomics	Ag NP-NM300K 01h	270.095	0.785	0.00621	['Malonylcarnitine', 'Linamarin']	C10H17NO6	HMDB02095;HMDB33699
736	Silver	Polar metabolomics	Ag NP-NM300K 01h	321.276	0.785	0.0123	['Nonadecanoic acid', 'Pristanic acid', 'Tuberculostearic acid', 'Methyl stearate', 'Isopropyl hexadecanoate', '4-Hydroxy-6-nonadecanone', '6-Hydroxy-4-nonadecanone', 'xi-17-Methyloctadecanoic acid', 'xi-16-Methyloctadecanoic acid']	C19H38O2	HMDB00772;HMDB00795;HMDB04085;HMDB34154;HMDB35474;HMDB35674;HMDB35675;HMDB37397;HMDB38070	LMFA01010019;LMPR0104010022;
737	Silver	Polar metabolomics	Ag NP-NM300K 01h	176.076	0.784	0.00714
738	Silver	Polar metabolomics	Ag NP-NM300K 01h	281.172	0.784	0.0218	['Tetradecanedioic acid', 'Diethyl decanedioate', 'Diisobutyl adipate', '2-Hydroxypropyl 2-isopropyl-5-methylcyclohexyl carbonate', '1-Hydroxypropan-2-yl 2-isopropyl-5-methylcyclohexyl carbonate']	C14H26O4	HMDB00872;HMDB40429;HMDB41618;HMDB59946;HMDB59947	LMFA01170018;
739	Silver	Polar metabolomics	Ag NP-NM300K 01h	211.058	0.783	0.0117	['Tetrahydro-2,5-furan-diacetic acid']	C8H12O5	HMDB59767
740	Silver	Polar metabolomics	Ag NP-NM300K 01h	217.156	0.783	0.0185	['Geranylacetone', '(+/-)-[R-(E)]-5-Isopropyl-8-methylnona-6,8-dien-2-one', '4-(2,6,6-Trimethyl-1-cyclohexen-1-yl)-2-butanone', 'Octahydro-6-isopropyl-2(1H)-naphthalenone', '7,8-Dehydro-3,4-dihydro-beta-ionol', 'beta-Ionol', 'Theaspirane', 'Dihydro-alpha-ionone', '5-Isopropyl-2-(2-methylpropyl)-2-cyclohexen-1-one', '4,7-Megastigmadien-9-ol', '(E)-2-(2-Octenyl)cyclopentanone', '(3S,6E)-Nerolidol']	C13H22O	HMDB31846;HMDB32355;HMDB32913;HMDB36026;HMDB36184;HMDB36820;HMDB36823;HMDB38026;HMDB38216;HMDB38731;HMDB38897;HMDB41629
741	Silver	Polar metabolomics	Ag NP-NM300K 01h	236.998	0.783	0.0157	['3-Methoxy-4,5-methylenedioxybenzoic acid', '4-Hydroxy-benzenepropanedioate']	C9H8O5	HMDB30800;HMDB59809
742	Silver	Polar metabolomics	Ag NP-NM300K 01h	301.198	0.783	0.0477
743	Silver	Polar metabolomics	Ag NP-NM300K 01h	361.235	0.783	0.0416	['14,15-DiHETrE', '8,9-DiHETrE', '11,12-DiHETrE', '5,6-DHET', '12-Keto-tetrahydro-leukotriene B4', '10,11-dihydro-leukotriene B4', '6,7-dihydro-12-epi-LTB4', 'Sterebin E', '15-Hydroperoxyeicosa-8Z,11Z,13E-trienoate']	C20H34O4	HMDB02265;HMDB02311;HMDB02314;HMDB02343;HMDB02995;HMDB12504;HMDB12838;HMDB35379;HMDB60106	LMFA03050010;LMFA03050006;LMFA03050008;LMFA03050004;LMFA03020004;
744	Silver	Polar metabolomics	Ag NP-NM300K 01h	306.248	0.782	0.0168
745	Silver	Polar metabolomics	Ag NP-NM300K 01h	313.25	0.782	0.0333	['(3S,6E,10E)-1,6,10,14-Phytatetraen-3-ol', '8alpha-13(16),14-Labdadien-8-ol', '(ent-16alpha)-16-Kauranol', '18-Deoxysagittarol', 'Serratol']	C20H34O	HMDB35083;HMDB35276;HMDB36723;HMDB36834;HMDB39827
746	Silver	Polar metabolomics	Ag NP-NM300K 01h	467.102	0.782	0.0157
747	Silver	Polar metabolomics	Ag NP-NM300K 01h	175.048	0.781	0.0308	['N1-Methyl-2-pyridone-5-carboxamide', 'N1-Methyl-4-pyridone-3-carboxamide']	C7H8N2O2	HMDB04193;HMDB04194
748	Silver	Polar metabolomics	Ag NP-NM300K 01h	302.829	0.781	0.0196
749	Silver	Polar metabolomics	Ag NP-NM300K 01h	86.0293	0.781	0.0155
750	Silver	Polar metabolomics	Ag NP-NM300K 01h	123.042	0.78	0.023	['Senecioic acid', 'Tiglic acid', '2-Ethylacrylic acid', '3-Methylbutyrolactone', 'Glutaral', 'Angelic acid', 'Dihydro-2-methyl-3(2H)-furanone', '2,3-Pentanedione', '4-Pentenoic acid', '2,4-Pentanedione', 'Isopropenyl acetate', 'Methyl methacrylate', '2-Pentenoic acid', 'Dihydro-5-methyl-2(3H)-furanone', 'Ethyl acrylate', 'Dihydro-3-methyl-2(3H)-furanone']	C5H8O2	HMDB00509;HMDB01470;HMDB01862;HMDB02167;HMDB29599;HMDB29608;HMDB31178;HMDB31598;HMDB31602;HMDB31648;HMDB32351;HMDB32385;HMDB32459;HMDB33840;HMDB33978;HMDB35143	LMFA01020097;LMFA01020030;LMFA01020111;
751	Silver	Polar metabolomics	Ag NP-NM300K 01h	140.076	0.78	0.0253
752	Silver	Polar metabolomics	Ag NP-NM300K 01h	163.037	0.78	0.0157	['Ethyl maltol', 'Furfuryl acetate', 'Ethyl furoate', 'Ethyl 3-furoate']	C7H8O3	HMDB31735;HMDB34246;HMDB59862;HMDB59880
753	Silver	Polar metabolomics	Ag NP-NM300K 01h	175.073	0.78	0.0215	['2-Isopropyl-1,4-benzenediol', '3-(4-Hydroxyphenyl)-1-propanol', '3-(5-Methyl-2-furanyl)butanal', '2-Propenyl 2,4-hexadienoate', '1-(2-Furanyl)-1-pentanone', '4-(Ethoxymethyl)phenol', '4-Ethyl-2-methoxyphenol', '2,6,6-Trimethyl-2-cyclohexene-1,4-dione', '2-(Ethoxymethyl)phenol', '(Dimethoxymethyl)benzene', '2-Isopropoxyphenol', '3,5-Dimethoxytoluene']	C9H12O2	HMDB32132;HMDB32599;HMDB36169;HMDB36227;HMDB39801;HMDB39956;HMDB40175;HMDB40216;HMDB40449;HMDB41326;HMDB41804;HMDB59853
754	Silver	Polar metabolomics	Ag NP-NM300K 01h	91.9798	0.78	0.0177
755	Silver	Polar metabolomics	Ag NP-NM300K 01h	93.031	0.78	0.0249	['(E)-2-Butenal', '3-Buten-2-one', 'Methacrolein']	C4H6O	HMDB34233;HMDB61873;HMDB61874
756	Silver	Polar metabolomics	Ag NP-NM300K 01h	139.073	0.779	0.0148	['Caproic acid', 'Isocaproic acid', 'Methyl (S)-2-Methylbutanoate', 'Methyl 3-methylbutanoate', 'Isopropyl propionate', 'Propyl propionate', 'Methyl pentanoate', '2-Ethylbutanoic acid', '2-Methylpropyl acetate', 'Ethyl 2-methylpropanoate', 'n-Butyl acetate', 'Diacetone alcohol', '3-Methylpentanoic acid', 'Ethyl butyrate', '3-Methylbutyl formate', '2,2,4-Trimethyl-1,3-dioxolane', '2,4,5-Trimethyl-…	C6H12O2	HMDB00535;HMDB00689;HMDB29762;HMDB30027;HMDB30056;HMDB30059;HMDB31207;HMDB31221;HMDB31246;HMDB31248;HMDB31325;HMDB31511;HMDB33774;HMDB33889;HMDB34163;HMDB37266;HMDB40279;HMDB40327	LMFA01010006;LMFA01020076;
757	Silver	Polar metabolomics	Ag NP-NM300K 01h	293.245	0.779	0.0173	['Heptadecanoic acid', '(S)-14-Methylhexadecanoic acid', 'Nonyl octanoate', '3-Methylbutyl dodecanoate', 'Isopropyl tetradecanoate', 'Ethyl pentadecanoate', 'Methyl hexadecanoic acid']	C17H34O2	HMDB02259;HMDB31067;HMDB34131;HMDB37372;HMDB40392;HMDB59870;HMDB61859	LMFA01010017;
758	Silver	Polar metabolomics	Ag NP-NM300K 01h	295.203	0.779	0.0258	['Palmitic acid', 'Trimethyltridecanoic acid', 'Isopalmitic acid', 'Butyl dodecanoate', 'Dodecyl butyrate', 'Hexyl decanoate', 'Octyl octanoate', 'Ethyl tetradecanoate', 'Dodecyl 2-methylpropanoate'];['5a-Androst-3-en-17-one ', '5alpha-Androst-16-en-3-one']	C16H32O2;C19H28O	HMDB00220;HMDB02396;HMDB31068;HMDB32065;HMDB32249;HMDB32324;HMDB33166;HMDB34153;HMDB36210;HMDB06046;HMDB34406	LMFA01010001;LMFA01020249;LMST02020094;
759	Silver	Polar metabolomics	Ag NP-NM300K 01h	138.089	0.778	0.0414	['N-(3-Methylbutyl)acetamide', 'N-(2-Methylpropyl)acetamide']	C6H13NO	HMDB31651;HMDB34203
760	Silver	Polar metabolomics	Ag NP-NM300K 01h	143.047	0.778	0.0191	['4-Hydroxystyrene', 'Phenylacetaldehyde', '2,3-Dihydrobenzofuran', '2-Methylbenzaldehyde', '3-Methylbenzaldehyde', '4-Methylbenzaldehyde', 'Acetophenone', 'Lentialexin']	C8H8O	HMDB04072;HMDB06236;HMDB13815;HMDB29636;HMDB29637;HMDB29638;HMDB33910;HMDB38997
761	Silver	Polar metabolomics	Ag NP-NM300K 01h	175.109	0.778	0.0239	['(-)-trans-Carveol', 'Perillyl alcohol', 'Alpha-Pinene-oxide', 'p-Menth-3-en-9-al', 'Isocitral', '3-Methyl-5-propyl-2-cyclohexen-1-one', '2,6-Dimethyl-1,7-octadien-3-one', '(E)-3,7-Dimethyl-1,5,7-octatrien-3-ol', '2-(trans-2-Pentenyl)cyclopentanone', 'p-Mentha-1(6),8-dien-3-ol', 'cis-2-Thujen-4-ol', '(R)-Campholenic aldehyde', '(R)-Carvotanacetone', 'Piperitone', '(+)-Fenchone', '(1S,4R)-p-Menth…	C10H16O	HMDB03450;HMDB03634;HMDB03667;HMDB30892;HMDB30893;HMDB31854;HMDB32120;HMDB32242;HMDB32536;HMDB34715;HMDB34916;HMDB34973;HMDB34974;HMDB34975;HMDB34985;HMDB35054;HMDB35077;HMDB35078;HMDB35092;HMDB35100;HMDB35120;HMDB35125;HMDB35158;HMDB35203;HMDB35241;HMDB35277;HMDB35280;HMDB35600;HMDB35604;HMDB35622;HMDB35656;HMDB35706;HMDB35737;HMDB35738;HMDB35741;HMDB35743;HMDB35744;HMDB36044;HMDB36079;HMDB36080…	LMPR0102090005;
762	Silver	Polar metabolomics	Ag NP-NM300K 01h	190.092	0.778	0.00682
763	Silver	Polar metabolomics	Ag NP-NM300K 01h	210.888	0.778	0.0199
764	Silver	Polar metabolomics	Ag NP-NM300K 01h	226.186	0.778	0.0231
765	Silver	Polar metabolomics	Ag NP-NM300K 01h	435.418	0.778	0.043	['erythro-8,10-Heptacosanediol', 'erythro-6,8-Heptacosanediol']	C27H56O2	HMDB31278;HMDB41071
766	Silver	Polar metabolomics	Ag NP-NM300K 01h	464.752	0.778	0.0461
767	Silver	Polar metabolomics	Ag NP-NM300K 01h	148.935	0.777	0.023
768	Silver	Polar metabolomics	Ag NP-NM300K 01h	179.141	0.777	0.0228	['Menthol', 'Decanal', '(E)-3-decen-1-ol', '2-Decanone', 'cis-4-Decenol', '3-Decanone', '3,7-Dimethyloctanal', '(+/-)-4-Ethyloctanal', '2-DECENOL', 'Menthanol', 'D-Citronellol', 'L-Citronellol', 'p-Menthan-4-ol', '(+)-Neomenthol', '(-)-Neoisomenthol', 'p-Menthan-3-ol', 'p-Menthan-1-ol', 'alpha-Citronellol', 'Dihydrocitronellal', '1-Decen-3-ol', '(+)-Neoisomenthol', '9-Decenol']	C10H20O	HMDB03352;HMDB11623;HMDB13810;HMDB31409;HMDB32206;HMDB32212;HMDB32241;HMDB32274;HMDB32532;HMDB34717;HMDB35093;HMDB35094;HMDB35726;HMDB35763;HMDB35764;HMDB35765;HMDB37020;HMDB37171;HMDB37806;HMDB39854;HMDB41628;HMDB59861	LMPR0102090001;LMFA06000052;
769	Silver	Polar metabolomics	Ag NP-NM300K 01h	208.102	0.777	0.00781
770	Silver	Polar metabolomics	Ag NP-NM300K 01h	305.209	0.777	0.0162
771	Silver	Polar metabolomics	Ag NP-NM300K 01h	466.749	0.777	0.043
772	Silver	Polar metabolomics	Ag NP-NM300K 01h	229.058	0.776	0.0257
773	Silver	Polar metabolomics	Ag NP-NM300K 01h	283.115	0.776	0.0189	['Glycerol tripropanoate']	C12H20O6	HMDB32857
774	Silver	Polar metabolomics	Ag NP-NM300K 01h	215.044	0.775	0.023
775	Silver	Polar metabolomics	Ag NP-NM300K 01h	225.182	0.775	0.0314	['Acetaldehyde diisoamyl acetal', '1,1-Dimethoxydecane']	C12H26O2	HMDB32153;HMDB37310
776	Silver	Polar metabolomics	Ag NP-NM300K 01h	362.785	0.775	0.0215
777	Silver	Polar metabolomics	Ag NP-NM300K 01h	151.109	0.774	0.0127	['Octanal', '2,5-Diethyltetrahydrofuran', '(R)-Sulcatol', '2-Octanone', 'Ethyl pentyl ketone', '(E)-2-Octen-1-ol', '(Z)-5-Octen-1-ol', '(R)-1-Octen-3-ol', '2-Methyl-3-heptanone', 'trans-3-Octen-2-ol', '(Z)-3-Octen-1-ol', '(E)-3-Octen-1-ol', 'xi-7-Octen-2-ol', '3,4-Dimethylcyclohexanol', '3,5-Dimethylcyclohexanol']	C8H16O	HMDB01140;HMDB29574;HMDB30030;HMDB31294;HMDB31295;HMDB31296;HMDB31298;HMDB31299;HMDB32402;HMDB32450;HMDB35231;HMDB35768;HMDB37181;HMDB61912;HMDB61913	LMFA06000028;
778	Silver	Polar metabolomics	Ag NP-NM300K 01h	195.116	0.774	0.0219
779	Silver	Polar metabolomics	Ag NP-NM300K 01h	276.985	0.774	0.0248
780	Silver	Polar metabolomics	Ag NP-NM300K 01h	125.057	0.773	0.0131	['Isovaleric acid', 'Valeric acid', 'Ethylmethylacetic acid', 'Ethyl propionate', 'Tetrahydro-2-furanmethanol', 'Isopropyl acetate', '2-Methylpropyl formate', 'Methyl isobutyrate', '3-Hydroxy-2-pentanone', '2,4-Dimethyl-1,3-dioxolane', 'Ethylene oxide/propylene oxide copolymer', '(S)-2-Methylbutanoic acid', 'Methyl butyrate', 'Propyl acetate', 'Tetrahydro-2-methyl-3-furanol', 'Butyl formate', 'Pi…	C5H10O2	HMDB00718;HMDB00892;HMDB02176;HMDB30058;HMDB31175;HMDB31241;HMDB31247;HMDB31249;HMDB31516;HMDB32230;HMDB32263;HMDB33742;HMDB33890;HMDB34237;HMDB39799;HMDB40575;HMDB41992;HMDB59678	LMFA01020181;LMFA01010005;LMFA01020072;
781	Silver	Polar metabolomics	Ag NP-NM300K 01h	199.049	0.773	0.0218
782	Silver	Polar metabolomics	Ag NP-NM300K 01h	206.894	0.772	0.0123
783	Silver	Polar metabolomics	Ag NP-NM300K 01h	165.934	0.77	0.0435
784	Silver	Polar metabolomics	Ag NP-NM300K 01h	310.243	0.77	0.0451
785	Silver	Polar metabolomics	Ag NP-NM300K 01h	449.883	0.77	0.0343
786	Silver	Polar metabolomics	Ag NP-NM300K 01h	111.016	0.769	0.0175
787	Silver	Polar metabolomics	Ag NP-NM300K 01h	321.043	0.768	0.0295
788	Silver	Polar metabolomics	Ag NP-NM300K 01h	360.788	0.768	0.0228
789	Silver	Polar metabolomics	Ag NP-NM300K 01h	264.852	0.767	0.0199
790	Silver	Polar metabolomics	Ag NP-NM300K 01h	149.939	0.766	0.0236
791	Silver	Polar metabolomics	Ag NP-NM300K 01h	210.895	0.766	0.0236
792	Silver	Polar metabolomics	Ag NP-NM300K 01h	316.776	0.766	0.0218
793	Silver	Polar metabolomics	Ag NP-NM300K 01h	182.05	0.765	0.0231
794	Silver	Polar metabolomics	Ag NP-NM300K 01h	150.053	0.764	0.0314	['D-1-Piperideine-2-carboxylic acid', '(S)-2,3,4,5-Tetrahydropiperidine-2-carboxylate', '(S)-2,3,4,5-tetrahydropyridine-2-carboxylate']	C6H9NO2	HMDB01084;HMDB12130;HMDB59657
795	Silver	Polar metabolomics	Ag NP-NM300K 01h	200.859	0.764	0.0257
796	Silver	Polar metabolomics	Ag NP-NM300K 01h	208.891	0.764	0.0152
797	Silver	Polar metabolomics	Ag NP-NM300K 01h	270.843	0.764	0.0179
798	Silver	Polar metabolomics	Ag NP-NM300K 01h	111.042	0.762	0.0123	['Butyric acid', 'Isobutyric acid', 'Acetoin', 'Methyl propionate', 'Ethyl acetate', '1-Hydroxy-2-butanone', 'Propyl formate', 'Isopropyl formate']	C4H8O2	HMDB00039;HMDB01873;HMDB03243;HMDB30062;HMDB31217;HMDB31507;HMDB40253;HMDB40579	LMFA01010004;LMFA01020071;LMFA12000020;
799	Silver	Polar metabolomics	Ag NP-NM300K 01h	325.812	0.762	0.0255
800	Silver	Polar metabolomics	Ag NP-NM300K 01h	141.052	0.761	0.0193	['3-Hydroxy-2-methyl-[R-(R,S)]-butanoic acid', '2-Methyl-3-hydroxybutyric acid', '2-Ethylhydracrylic acid', '2-Hydroxy-3-methylbutyric acid', '3-Hydroxy-2-methyl-[S-(R,R)]-butanoic acid', '3-Hydroxyvaleric acid', 'Erythronilic acid', '3-Hydroxyisovaleric acid', '2-Hydroxyvaleric acid', '2-Hydroxy-2-methylbutyric acid', '4-Hydroxyisovaleric acid', 'Ethyl lactate', 'Methyl 3-hydroxybutyrate', 'Diet…	C5H10O3	HMDB00351;HMDB00354;HMDB00396;HMDB00407;HMDB00410;HMDB00531;HMDB00642;HMDB00754;HMDB01863;HMDB01987;HMDB02011;HMDB40735;HMDB41603;HMDB59844;HMDB61927	LMFA01050391;LMFA01050388;LMFA01050008;LMFA01050393;LMFA01050396;LMFA01050007;LMFA01050389;LMFA01050399;
801	Silver	Polar metabolomics	Ag NP-NM300K 01h	210.935	0.761	0.0314
802	Silver	Polar metabolomics	Ag NP-NM300K 01h	150.932	0.76	0.0218
803	Silver	Polar metabolomics	Ag NP-NM300K 01h	224.893	0.76	0.0269
804	Silver	Polar metabolomics	Ag NP-NM300K 01h	269.85	0.76	0.0451
805	Silver	Polar metabolomics	Ag NP-NM300K 01h	80.9479	0.76	0.0259
806	Silver	Polar metabolomics	Ag NP-NM300K 01h	82.9449	0.76	0.0256
807	Silver	Polar metabolomics	Ag NP-NM300K 01h	265.856	0.759	0.0333
808	Silver	Polar metabolomics	Ag NP-NM300K 01h	110.058	0.757	0.0176	['4-Aminobutyraldehyde', 'N-Ethylacetamide', 'Morpholine', 'Butyramide']	C4H9NO	HMDB01080;HMDB31215;HMDB31581;HMDB33870
809	Silver	Polar metabolomics	Ag NP-NM300K 01h	400.759	0.757	0.0207
810	Silver	Polar metabolomics	Ag NP-NM300K 01h	162.097	0.755	0.0232
811	Silver	Polar metabolomics	Ag NP-NM300K 01h	164.93	0.755	0.0256
812	Silver	Polar metabolomics	Ag NP-NM300K 01h	270.891	0.755	0.0361
813	Silver	Polar metabolomics	Ag NP-NM300K 01h	277.989	0.754	0.00427
814	Silver	Polar metabolomics	Ag NP-NM300K 01h	424.785	0.754	0.0231
815	Silver	Polar metabolomics	Ag NP-NM300K 01h	166.934	0.753	0.0283
816	Silver	Polar metabolomics	Ag NP-NM300K 01h	185.034	0.753	0.0256
817	Silver	Polar metabolomics	Ag NP-NM300K 01h	422.788	0.753	0.0251
818	Silver	Polar metabolomics	Ag NP-NM300K 01h	490.652	0.753	0.0331
819	Silver	Polar metabolomics	Ag NP-NM300K 01h	193.111	0.752	0.0123
820	Silver	Polar metabolomics	Ag NP-NM300K 01h	260.815	0.752	0.0207
821	Silver	Polar metabolomics	Ag NP-NM300K 01h	306.871	0.752	0.0306
822	Silver	Polar metabolomics	Ag NP-NM300K 01h	374.897	0.752	0.0108
823	Silver	Polar metabolomics	Ag NP-NM300K 01h	83.0103	0.752	0.0176	['Acetic acid', 'Glycolaldehyde']	C2H4O2	HMDB00042;HMDB03344	LMFA01010002;
824	Silver	Polar metabolomics	Ag NP-NM300K 01h	222.889	0.751	0.023
825	Silver	Polar metabolomics	Ag NP-NM300K 01h	322.811	0.751	0.0155
826	Silver	Polar metabolomics	Ag NP-NM300K 01h	112.045	0.75	0.014
827	Silver	Polar metabolomics	Ag NP-NM300K 01h	320.818	0.75	0.0286
828	Silver	Polar metabolomics	Ag NP-NM300K 01h	430.697	0.75	0.0215
829	Silver	Polar metabolomics	Ag NP-NM300K 01h	484.741	0.75	0.0433
830	Silver	Polar metabolomics	Ag NP-NM300K 01h	262.812	0.749	0.0389
831	Silver	Polar metabolomics	Ag NP-NM300K 01h	140.904	0.748	0.0231
832	Silver	Polar metabolomics	Ag NP-NM300K 01h	216.02	0.748	0.00659
833	Silver	Polar metabolomics	Ag NP-NM300K 01h	266.849	0.748	0.0168
834	Silver	Polar metabolomics	Ag NP-NM300K 01h	330.799	0.748	0.0359
835	Silver	Polar metabolomics	Ag NP-NM300K 01h	326.805	0.747	0.0155
836	Silver	Polar metabolomics	Ag NP-NM300K 01h	364.829	0.747	0.0233
837	Silver	Polar metabolomics	Ag NP-NM300K 01h	404.8	0.747	0.0417
838	Silver	Polar metabolomics	Ag NP-NM300K 01h	192.108	0.746	0.00715
839	Silver	Polar metabolomics	Ag NP-NM300K 01h	111.005	0.745	0.0123	['Pyruvic acid', 'Malonic semialdehyde', 'Glucosereductone']	C3H4O3	HMDB00243;HMDB11111;HMDB40261	LMFA01060077;
840	Silver	Polar metabolomics	Ag NP-NM300K 01h	142.948	0.745	0.0397
841	Silver	Polar metabolomics	Ag NP-NM300K 01h	268.846	0.745	0.0174
842	Silver	Polar metabolomics	Ag NP-NM300K 01h	134.029	0.744	0.0327
843	Silver	Polar metabolomics	Ag NP-NM300K 01h	196.865	0.744	0.0197
844	Silver	Polar metabolomics	Ag NP-NM300K 01h	220.03	0.744	0.0467
845	Silver	Polar metabolomics	Ag NP-NM300K 01h	478.702	0.744	0.0356
846	Silver	Polar metabolomics	Ag NP-NM300K 01h	110.021	0.743	0.016	['2-Aminoacrylic acid', '3-Isoxazolidinone']	C3H5NO2	HMDB03609;HMDB39426
847	Silver	Polar metabolomics	Ag NP-NM300K 01h	138.906	0.743	0.0196
848	Silver	Polar metabolomics	Ag NP-NM300K 01h	194.16	0.743	0.0176
849	Silver	Polar metabolomics	Ag NP-NM300K 01h	224.886	0.743	0.0219
850	Silver	Polar metabolomics	Ag NP-NM300K 01h	258.818	0.743	0.0176
851	Silver	Polar metabolomics	Ag NP-NM300K 01h	280.847	0.743	0.0183
852	Silver	Polar metabolomics	Ag NP-NM300K 01h	142.901	0.742	0.019
853	Silver	Polar metabolomics	Ag NP-NM300K 01h	262.859	0.742	0.0208
854	Silver	Polar metabolomics	Ag NP-NM300K 01h	267.853	0.742	0.0105
855	Silver	Polar metabolomics	Ag NP-NM300K 01h	274.979	0.742	0.00855	[""4-[2,2'-Bithiophen-5-yl]-3-butyn-1-ol""]	C12H10OS2	HMDB34453
856	Silver	Polar metabolomics	Ag NP-NM300K 01h	124.937	0.741	0.0377
857	Silver	Polar metabolomics	Ag NP-NM300K 01h	312.782	0.741	0.0208
858	Silver	Polar metabolomics	Ag NP-NM300K 01h	318.773	0.741	0.0199
859	Silver	Polar metabolomics	Ag NP-NM300K 01h	324.808	0.741	0.0171
860	Silver	Polar metabolomics	Ag NP-NM300K 01h	260.862	0.74	0.0258
861	Silver	Polar metabolomics	Ag NP-NM300K 01h	380.77	0.74	0.0176
862	Silver	Polar metabolomics	Ag NP-NM300K 01h	151.048	0.739	0.0284	['Dihydrothymine', 'Squamolone', 'L-Cyclo(alanylglycyl)']	C5H8N2O2	HMDB00079;HMDB29874;HMDB31547
863	Silver	Polar metabolomics	Ag NP-NM300K 01h	262.907	0.739	0.0417
864	Silver	Polar metabolomics	Ag NP-NM300K 01h	272.043	0.739	0.0227
865	Silver	Polar metabolomics	Ag NP-NM300K 01h	284.848	0.739	0.0218
866	Silver	Polar metabolomics	Ag NP-NM300K 01h	192.071	0.738	0.0101
867	Silver	Polar metabolomics	Ag NP-NM300K 01h	256.821	0.738	0.0195
868	Silver	Polar metabolomics	Ag NP-NM300K 01h	314.779	0.738	0.0155
869	Silver	Polar metabolomics	Ag NP-NM300K 01h	268.894	0.737	0.0207
870	Silver	Polar metabolomics	Ag NP-NM300K 01h	286.893	0.737	0.0231
871	Silver	Polar metabolomics	Ag NP-NM300K 01h	378.73	0.737	0.0168
872	Silver	Polar metabolomics	Ag NP-NM300K 01h	382.766	0.737	0.0183
873	Silver	Polar metabolomics	Ag NP-NM300K 01h	398.761	0.737	0.0218
874	Silver	Polar metabolomics	Ag NP-NM300K 01h	482.744	0.737	0.0257
875	Silver	Polar metabolomics	Ag NP-NM300K 01h	191.104	0.736	0.00427	['trans-4,5-epoxy-2(E)-decenal', 'Ethyl (4Z)-4,7-octadienoate', 'Methyl octynecarboxylate', '(+/-)-Dihydromintlactone', '2,4-Hexadienyl butyrate', '2,4-Hexadienyl isobutyrate', 'cis-3-Hexenyl crotonate', '(+/-)-2-(5-Methyl-5-vinyltetrahydrofuran-2-yl)propionaldehyde', '(-)-(Z)-Tetrahydro-6-(2-pentenyl)-2H-pyran-2-one', '5,6-Dihydro-6-pentyl-2H-pyran-2-one', '6-Hydroxy-2,6-dimethyl-2,7-octadien-4-…	C10H16O2	HMDB13105;HMDB31156;HMDB31273;HMDB32219;HMDB32312;HMDB32313;HMDB32319;HMDB32434;HMDB33700;HMDB34452;HMDB34670;HMDB35714;HMDB35766;HMDB35829;HMDB36067;HMDB36103;HMDB37014;HMDB37175;HMDB37821;HMDB40639
876	Silver	Polar metabolomics	Ag NP-NM300K 01h	231.06	0.736	0.0402	['1-(4-Methoxyphenyl)-1-penten-3-one', '3-(2-Methylpropylidene)-3alpha,4-dihydro-1(3H)-isobenzofuranone', '(S)-3-Butyl-1(3H)-isobenzofuranone', 'Benzyl trans-2-methyl-2-butenoate', 'Prenyl benzoate', '(R)-3,7-Dimethyl-5-indanecarboxylic acid', 'Ligustilide', 'Benzyl tiglate', 'Propyl cinnamate', 'Isopropyl cinnamate', 'Cinnamyl propionate']	C12H14O2	HMDB30905;HMDB32027;HMDB32064;HMDB32177;HMDB32488;HMDB33033;HMDB34277;HMDB37627;HMDB37700;HMDB37701;HMDB41315
877	Silver	Polar metabolomics	Ag NP-NM300K 01h	259.978	0.736	0.00398
878	Silver	Polar metabolomics	Ag NP-NM300K 01h	428.7	0.736	0.0231
879	Silver	Polar metabolomics	Ag NP-NM300K 01h	178.048	0.735	0.0358
880	Silver	Polar metabolomics	Ag NP-NM300K 01h	198.862	0.735	0.0217
881	Silver	Polar metabolomics	Ag NP-NM300K 01h	202.856	0.735	0.0105
882	Silver	Polar metabolomics	Ag NP-NM300K 01h	267.176	0.735	0.0456
883	Silver	Polar metabolomics	Ag NP-NM300K 01h	96.0419	0.735	0.0324	['3-Aminopropionaldehyde', 'N,N-Dimethylformamide', 'Aminoacetone']	C3H7NO	HMDB01106;HMDB01888;HMDB02134
884	Silver	Polar metabolomics	Ag NP-NM300K 01h	440.725	0.734	0.0218
885	Silver	Polar metabolomics	Ag NP-NM300K 01h	480.747	0.734	0.0286
886	Silver	Polar metabolomics	Ag NP-NM300K 01h	95.0467	0.734	0.0211	['Tetrahydrofuran', 'Butanone', 'Butanal', '2-Methylpropanal', '3-Buten-1-ol', '2-Buten-1-ol', '2,2-Dimethyloxirane']	C4H8O	HMDB00246;HMDB00474;HMDB03543;HMDB31243;HMDB31324;HMDB33858;HMDB34431	LMFA12000043;
887	Silver	Polar metabolomics	Ag NP-NM300K 01h	149.094	0.733	0.0199	['(E)-2-octenal', '2-Octenal', '(3xi,5Z)-1,5-Octadien-3-ol', '2,4,4-Trimethylcyclopentanone', '2-Octen-4-one', '1-Octen-3-one', '3-Methyl-3-hepten-2-one', '5-Methyl-5-hepten-2-one', '6-Methyl-3-hepten-2-one, trans-', '4-Octen-3-one', '3-Octen-2-one', '(S,E)-Filbertone', '5-Octen-2-one', 'Sulcatone', '2-Ethylidenehexanal', '6-Octenal', '(Z)-5-Octenal', '2,5-Octadien-1-ol', '(3E,5Z)-3,5-Octadien-1-…	C8H14O	HMDB13809;HMDB30961;HMDB30966;HMDB31197;HMDB31301;HMDB31309;HMDB31590;HMDB31591;HMDB32403;HMDB32451;HMDB33547;HMDB35242;HMDB35390;HMDB35915;HMDB37152;HMDB39769;HMDB39770;HMDB40146;HMDB40149;HMDB40151;HMDB61945
888	Silver	Polar metabolomics	Ag NP-NM300K 01h	121.062	0.732	0.0168	['Cyclohexanone', '2-Methyl-4-pentenal', '4-Methyl-2-pentenal', '2-Hexenal', '3-Hexenal', '(Z)-3-Hexenal', '4-Methyl-3-penten-2-one, 9CI', '4-Methyl-4-penten-2-one', '(E)-4-Hexenal', '2-Methyl-2-pentenal', '4-Hexen-3-one', '(Z)-2-Hexenal', '(Z)-4-Hexenal']	C6H10O	HMDB03315;HMDB30332;HMDB31196;HMDB31496;HMDB31497;HMDB31498;HMDB31563;HMDB31564;HMDB33549;HMDB33714;HMDB35239;HMDB40264;HMDB40271
889	Silver	Polar metabolomics	Ag NP-NM300K 01h	237.996	0.732	0.00851
890	Silver	Polar metabolomics	Ag NP-NM300K 01h	256.007	0.732	0.0231
891	Silver	Polar metabolomics	Ag NP-NM300K 01h	384.763	0.732	0.0142
892	Silver	Polar metabolomics	Ag NP-NM300K 01h	486.658	0.732	0.0256
893	Silver	Polar metabolomics	Ag NP-NM300K 01h	181.058	0.731	0.0257	['1-(Hydroxymethyl)-5,5-dimethyl-2,4-imidazolidinedione']	C6H10N2O3	HMDB31670
894	Silver	Polar metabolomics	Ag NP-NM300K 01h	271.04	0.731	0.023
895	Silver	Polar metabolomics	Ag NP-NM300K 01h	274.965	0.731	0.0314
896	Silver	Polar metabolomics	Ag NP-NM300K 01h	282.844	0.731	0.0193
897	Silver	Polar metabolomics	Ag NP-NM300K 01h	316.824	0.731	0.0188
898	Silver	Polar metabolomics	Ag NP-NM300K 01h	444.72	0.731	0.0191
899	Silver	Polar metabolomics	Ag NP-NM300K 01h	322.862	0.73	0.0314
900	Silver	Polar metabolomics	Ag NP-NM300K 01h	328.802	0.73	0.0186
901	Silver	Polar metabolomics	Ag NP-NM300K 01h	454.723	0.73	0.0223
902	Silver	Polar metabolomics	Ag NP-NM300K 01h	142.056	0.729	0.0155
903	Silver	Polar metabolomics	Ag NP-NM300K 01h	376.78	0.729	0.0131
904	Silver	Polar metabolomics	Ag NP-NM300K 01h	453.924	0.729	0.0241
905	Silver	Polar metabolomics	Ag NP-NM300K 01h	254.824	0.728	0.0163
906	Silver	Polar metabolomics	Ag NP-NM300K 01h	284.841	0.728	0.0192
907	Silver	Polar metabolomics	Ag NP-NM300K 01h	400.806	0.728	0.0241
908	Silver	Polar metabolomics	Ag NP-NM300K 01h	494.646	0.728	0.0282
909	Silver	Polar metabolomics	Ag NP-NM300K 01h	81.0311	0.728	0.0207	['Acetone', 'Propanal', 'Methyloxirane', 'Allyl alcohol']	C3H6O	HMDB01659;HMDB03366;HMDB31558;HMDB31652	LMFA12000057;
910	Silver	Polar metabolomics	Ag NP-NM300K 01h	386.761	0.727	0.0176
911	Silver	Polar metabolomics	Ag NP-NM300K 01h	432.857	0.727	0.0301
912	Silver	Polar metabolomics	Ag NP-NM300K 01h	442.722	0.727	0.0143
913	Silver	Polar metabolomics	Ag NP-NM300K 01h	184.102	0.726	0.0447
914	Silver	Polar metabolomics	Ag NP-NM300K 01h	284.889	0.726	0.0352
915	Silver	Polar metabolomics	Ag NP-NM300K 01h	436.688	0.726	0.031
916	Silver	Polar metabolomics	Ag NP-NM300K 01h	434.691	0.725	0.0284
917	Silver	Polar metabolomics	Ag NP-NM300K 01h	488.655	0.725	0.0245
918	Silver	Polar metabolomics	Ag NP-NM300K 01h	137.094	0.724	0.0175	['2-Heptanone', '4-Heptanone', 'Ethyl isobutyl ketone', '(Z)-4-Hepten-1-ol', '2,4-Dimethyl-3-pentanone', 'Heptanal', '3-Heptanone', '3-Methylcyclohexanol', '5-Methyl-2-hexanone', '3-Methylhexanal', '1-Ethoxy-3-methyl-2-butene', '(2R,4Z)-4-Hepten-2-ol', '1-Methylcyclohexanol', '2-Methyl-3-hexanone']	C7H14O	HMDB03671;HMDB04814;HMDB05841;HMDB31405;HMDB31429;HMDB31475;HMDB31482;HMDB31538;HMDB31549;HMDB32405;HMDB38052;HMDB41320;HMDB59693;HMDB61896	LMFA12000004;LMFA12000118;LMFA12000088;
919	Silver	Polar metabolomics	Ag NP-NM300K 01h	258.865	0.724	0.0219
920	Silver	Polar metabolomics	Ag NP-NM300K 01h	202.904	0.723	0.0334
921	Silver	Polar metabolomics	Ag NP-NM300K 01h	342.8	0.723	0.0193
922	Silver	Polar metabolomics	Ag NP-NM300K 01h	356.956	0.722	0.00321
923	Silver	Polar metabolomics	Ag NP-NM300K 01h	212.076	0.721	0.0314
924	Silver	Polar metabolomics	Ag NP-NM300K 01h	396.764	0.72	0.0186
925	Silver	Polar metabolomics	Ag NP-NM300K 01h	492.697	0.72	0.0218
926	Silver	Polar metabolomics	Ag NP-NM300K 01h	496.739	0.72	0.0236
927	Silver	Polar metabolomics	Ag NP-NM300K 01h	83.0467	0.72	0.0342	['Propyl alcohol', 'Isopropyl alcohol']	C3H8O	HMDB00820;HMDB00863	LMFA05000101;
928	Silver	Polar metabolomics	Ag NP-NM300K 01h	320.77	0.719	0.0174
929	Silver	Polar metabolomics	Ag NP-NM300K 01h	335.292	0.719	0.00983	['3D,7D,11D-Phytanic acid', '3L,7D,11D-Phytanic acid', 'Phytanic acid', 'Arachidic acid', '2,2,6,10,14-Pentamethylpentadecanoic acid', 'Ethyl stearate', '5-Hydroxy-7-eicosanone', '4-Hydroxy-6-eicosanone']	C20H40O2	HMDB00417;HMDB00553;HMDB00801;HMDB02212;HMDB31318;HMDB34156;HMDB35672;HMDB35673	LMPR0104010036;LMPR0104010034;LMFA01010020;
930	Silver	Polar metabolomics	Ag NP-NM300K 01h	455.907	0.719	0.00102
931	Silver	Polar metabolomics	Ag NP-NM300K 01h	150.097	0.718	0.0173
932	Silver	Polar metabolomics	Ag NP-NM300K 01h	340.803	0.718	0.0179
933	Silver	Polar metabolomics	Ag NP-NM300K 01h	518.72	0.718	0.0315
934	Silver	Polar metabolomics	Ag NP-NM300K 01h	94.0262	0.718	0.0104	['Acrylamide']	C3H5NO	HMDB04296
935	Silver	Polar metabolomics	Ag NP-NM300K 01h	378.939	0.717	0.0357
936	Silver	Polar metabolomics	Ag NP-NM300K 01h	380.822	0.717	0.0218
937	Silver	Polar metabolomics	Ag NP-NM300K 01h	106.063	0.716	0.00767	['(+)-2,3-Dihydro-3-methyl-1H-pyrrole', 'Pentanenitrile']	C5H9N	HMDB33529;HMDB40173
938	Silver	Polar metabolomics	Ag NP-NM300K 01h	315.962	0.716	0.00907
939	Silver	Polar metabolomics	Ag NP-NM300K 01h	432.742	0.716	0.0184
940	Silver	Polar metabolomics	Ag NP-NM300K 01h	438.78	0.716	0.0218
941	Silver	Polar metabolomics	Ag NP-NM300K 01h	520.717	0.716	0.0315
942	Silver	Polar metabolomics	Ag NP-NM300K 01h	318.821	0.715	0.0191
943	Silver	Polar metabolomics	Ag NP-NM300K 01h	434.739	0.715	0.0197
944	Silver	Polar metabolomics	Ag NP-NM300K 01h	518.673	0.715	0.0293
945	Silver	Polar metabolomics	Ag NP-NM300K 01h	372.738	0.714	0.0168
946	Silver	Polar metabolomics	Ag NP-NM300K 01h	402.803	0.714	0.023
947	Silver	Polar metabolomics	Ag NP-NM300K 01h	436.736	0.714	0.0199
948	Silver	Polar metabolomics	Ag NP-NM300K 01h	516.723	0.714	0.0295
949	Silver	Polar metabolomics	Ag NP-NM300K 01h	82.0345	0.714	0.0224
950	Silver	Polar metabolomics	Ag NP-NM300K 01h	320.865	0.713	0.0258
951	Silver	Polar metabolomics	Ag NP-NM300K 01h	516.676	0.713	0.032
952	Silver	Polar metabolomics	Ag NP-NM300K 01h	122.029	0.711	0.041
953	Silver	Polar metabolomics	Ag NP-NM300K 01h	200.907	0.711	0.0218
954	Silver	Polar metabolomics	Ag NP-NM300K 01h	222.929	0.711	0.0499
955	Silver	Polar metabolomics	Ag NP-NM300K 01h	65.0193	0.711	0.0384
956	Silver	Polar metabolomics	Ag NP-NM300K 01h	181.139	0.71	0.0353
957	Silver	Polar metabolomics	Ag NP-NM300K 01h	470.956	0.71	0.0253
958	Silver	Polar metabolomics	Ag NP-NM300K 01h	162.113	0.709	0.0228	['L-Carnitine']	C7H15NO3	HMDB00062
959	Silver	Polar metabolomics	Ag NP-NM300K 01h	338.806	0.709	0.0177
960	Silver	Polar metabolomics	Ag NP-NM300K 01h	456.72	0.709	0.0295
961	Silver	Polar metabolomics	Ag NP-NM300K 01h	512.682	0.709	0.0236
962	Silver	Polar metabolomics	Ag NP-NM300K 01h	342.848	0.708	0.0248
963	Silver	Polar metabolomics	Ag NP-NM300K 01h	374.782	0.708	0.0162
964	Silver	Polar metabolomics	Ag NP-NM300K 01h	436.783	0.708	0.0229
965	Silver	Polar metabolomics	Ag NP-NM300K 01h	494.842	0.708	0.0201
966	Silver	Polar metabolomics	Ag NP-NM300K 01h	504.676	0.708	0.0246
967	Silver	Polar metabolomics	Ag NP-NM300K 01h	223.055	0.707	0.0417	['Amyl 2-furoate', '4-Ethyl-2,6-dimethoxyphenol', 'Verimol J', '4-(Ethoxymethyl)-2-methoxyphenol', 'Furfuryl pentanoate', 'Peperinic acid', '2-Ethoxy-4-(methoxymethyl)phenol', 'Furfuryl isovalerate', 'Isoamyl 2-furoate']	C10H14O3	HMDB29456;HMDB33394;HMDB36522;HMDB37641;HMDB37727;HMDB38181;HMDB38354;HMDB39874;HMDB59891
968	Silver	Polar metabolomics	Ag NP-NM300K 01h	432.694	0.707	0.0218
969	Silver	Polar metabolomics	Ag NP-NM300K 01h	480.699	0.707	0.0361
970	Silver	Polar metabolomics	Ag NP-NM300K 01h	492.649	0.707	0.0397
971	Silver	Polar metabolomics	Ag NP-NM300K 01h	460.714	0.706	0.0186
972	Silver	Polar metabolomics	Ag NP-NM300K 01h	462.759	0.706	0.0218
973	Silver	Polar metabolomics	Ag NP-NM300K 01h	225.035	0.704	0.0281	['Vanylglycol', '1-(3-Hydroxy-4-methoxyphenyl)-1,2-ethanediol', 'Genipic acid', '4-Formyl-3-(formylmethyl)-4-hexenoic acid', '3,4-Methylenepimelic acid']	C9H12O4	HMDB01490;HMDB35056;HMDB36072;HMDB39650;HMDB59730
974	Silver	Polar metabolomics	Ag NP-NM300K 01h	64.016	0.704	0.0384
975	Silver	Polar metabolomics	Ag NP-NM300K 01h	378.824	0.702	0.0188
976	Silver	Polar metabolomics	Ag NP-NM300K 01h	496.644	0.702	0.0411
977	Silver	Polar metabolomics	Ag NP-NM300K 01h	502.678	0.702	0.0268
978	Silver	Polar metabolomics	Ag NP-NM300K 01h	514.679	0.702	0.0229
979	Silver	Polar metabolomics	Ag NP-NM300K 01h	520.67	0.701	0.0253
980	Silver	Polar metabolomics	Ag NP-NM300K 01h	170.087	0.7	0.0215
981	Silver	Polar metabolomics	Ag NP-NM300K 01h	316.891	0.699	0.00102
982	Silver	Polar metabolomics	Ag NP-NM300K 01h	458.717	0.699	0.0191
983	Silver	Polar metabolomics	Ag NP-NM300K 01h	282.956	0.697	0.0417
984	Silver	Polar metabolomics	Ag NP-NM300K 01h	494.741	0.696	0.0215
985	Silver	Polar metabolomics	Ag NP-NM300K 01h	258.836	0.694	0.0482
986	Silver	Polar metabolomics	Ag NP-NM300K 01h	458.765	0.694	0.0231
987	Silver	Polar metabolomics	Ag NP-NM300K 01h	490.7	0.694	0.0228
988	Silver	Polar metabolomics	Ag NP-NM300K 01h	370.741	0.691	0.014
989	Silver	Polar metabolomics	Ag NP-NM300K 01h	374.735	0.691	0.0143
990	Silver	Polar metabolomics	Ag NP-NM300K 01h	462.807	0.691	0.0367
991	Silver	Polar metabolomics	Ag NP-NM300K 01h	164.117	0.69	0.0262
992	Silver	Polar metabolomics	Ag NP-NM300K 01h	169.084	0.69	0.0209	['3-Hydroxyisoheptanoic acid', '(+/-)-Ethyl 2-hydroxy-2-methylbutyrate', 'Methyl DL-Leucate', 'Butyl lactate', 'Ethyl 2-hydroxyisovalerate', '3-hydroxyheptanoic acid']	C7H14O3	HMDB02207;HMDB32269;HMDB36231;HMDB40254;HMDB59842;HMDB61653
993	Silver	Polar metabolomics	Ag NP-NM300K 01h	144.952	0.689	0.0246
994	Silver	Polar metabolomics	Ag NP-NM300K 01h	163.116	0.689	0.0233
995	Silver	Polar metabolomics	Ag NP-NM300K 01h	344.845	0.689	0.0191
996	Silver	Polar metabolomics	Ag NP-NM300K 01h	500.682	0.689	0.0223
997	Silver	Polar metabolomics	Ag NP-NM300K 01h	304.938	0.688	0.0314
998	Silver	Polar metabolomics	Ag NP-NM300K 01h	122.066	0.686	0.00293
999	Silver	Polar metabolomics	Ag NP-NM300K 01h	182.042	0.686	0.0279	['L-2-Amino-4-methylenepentanedioic acid', 'L-trans-alpha-Amino-2-carboxycyclopropaneacetic acid']	C6H9NO4	HMDB29433;HMDB34442
1000	Silver	Polar metabolomics	Ag NP-NM300K 01h	520.765	0.685	0.0285
1001	Silver	Polar metabolomics	Ag NP-NM300K 01h	574.68	0.684	0.0387
1002	Silver	Polar metabolomics	Ag NP-NM300K 01h	290.951	0.682	0.0155
1003	Silver	Polar metabolomics	Ag NP-NM300K 01h	441.728	0.681	0.0361
1004	Silver	Polar metabolomics	Ag NP-NM300K 01h	494.694	0.681	0.02
1005	Silver	Polar metabolomics	Ag NP-NM300K 01h	522.762	0.681	0.0353
1006	Silver	Polar metabolomics	Ag NP-NM300K 01h	234.191	0.679	0.00203
1007	Silver	Polar metabolomics	Ag NP-NM300K 01h	322.964	0.679	0.0218
1008	Silver	Polar metabolomics	Ag NP-NM300K 01h	203.053	0.678	0.0177	['D-Glucose', 'D-Galactose', 'D-Mannose', 'Myoinositol', '3-Deoxyarabinohexonic acid', 'Beta-D-Glucose', 'D-Fructose', 'Allose', 'L-Sorbose', 'Alpha-D-Glucose', 'D-Tagatose', 'Beta-D-Galactose', 'Scyllitol', 'L-Gulose', 'Dihydroxyacetone (dimer)', 'L-Galactose', 'Levoinositol', 'Alpha-D-Glucopyranoside', 'D-Glucopyranoside']	C6H12O6	HMDB00122;HMDB00143;HMDB00169;HMDB00211;HMDB00346;HMDB00516;HMDB00660;HMDB01151;HMDB01266;HMDB03345;HMDB03418;HMDB03449;HMDB06088;HMDB12326;HMDB32222;HMDB33704;HMDB34220;HMDB61922;HMDB62170
1009	Silver	Polar metabolomics	Ag NP-NM300K 01h	258.933	0.678	0.000859
1010	Silver	Polar metabolomics	Ag NP-NM300K 01h	204.056	0.677	0.0195
1011	Silver	Polar metabolomics	Ag NP-NM300K 01h	262.014	0.674	0.0168
1012	Silver	Polar metabolomics	Ag NP-NM300K 01h	328.999	0.668	0.0314
1013	Silver	Polar metabolomics	Ag NP-NM300K 01h	479.699	0.666	0.0496
1014	Silver	Polar metabolomics	Ag NP-NM300K 01h	235.996	0.665	0.0312
1015	Silver	Polar metabolomics	Ag NP-NM300K 01h	257.949	0.665	0.042
1016	Silver	Polar metabolomics	Ag NP-NM300K 01h	105.042	0.661	0.00525	['Fomepizole']	C4H6N2	HMDB15344
1017	Silver	Polar metabolomics	Ag NP-NM300K 01h	323.011	0.659	0.0236	['N-Methoxyspirobrassinol']	C12H14N2O2S2	HMDB41133
1018	Silver	Polar metabolomics	Ag NP-NM300K 01h	156.071	0.657	0.0321
1019	Silver	Polar metabolomics	Ag NP-NM300K 01h	264.238	0.652	0.00113
1020	Silver	Polar metabolomics	Ag NP-NM300K 01h	263.008	0.643	0.0183
1021	Silver	Polar metabolomics	Ag NP-NM300K 01h	514.748	0.64	0.0188
1022	Silver	Polar metabolomics	Ag NP-NM300K 01h	178.993	0.636	0.0131	['2-Methoxybenzenethiol', 'Kahweofuran', '2-Acetyl-5-methylthiophene', '2-Propanoylthiophene', '2-(Methylthio)phenol', '2-Acetyl-3-methylthiophene'];['4-Hydroxybenzoic acid', 'Salicylic acid', '3-Hydroxybenzoic acid', 'Gentisate aldehyde', '2-Methoxy-1,4-benzoquinone', 'alpha-Furyl methyl diketone', 'Sesamol', '3,4-Dihydroxybenzaldehyde']	C7H8OS;C7H6O3	HMDB32571;HMDB32922;HMDB33130;HMDB33159;HMDB41281;HMDB41502;HMDB00500;HMDB01895;HMDB02466;HMDB04062;HMDB32576;HMDB32920;HMDB33812;HMDB59965
1023	Silver	Polar metabolomics	Ag NP-NM300K 01h	608.67	0.634	0.0201
1024	Silver	Polar metabolomics	Ag NP-NM300K 01h	606.632	0.629	0.0183
1025	Silver	Polar metabolomics	Ag NP-NM300K 01h	318.97	0.624	0.0218
1026	Silver	Polar metabolomics	Ag NP-NM300K 01h	320.967	0.621	0.0233
1027	Silver	Polar metabolomics	Ag NP-NM300K 01h	157.011	0.618	0.00483	['L-Malic acid', 'Malic acid', 'D-Malic acid', 'Velcorin']	C4H6O5	HMDB00156;HMDB00744;HMDB31518;HMDB32872
1028	Silver	Polar metabolomics	Ag NP-NM300K 01h	180.144	0.616	0.0123
1029	Silver	Polar metabolomics	Ag NP-NM300K 01h	598.642	0.611	0.00913
1030	Silver	Polar metabolomics	Ag NP-NM300K 01h	184.058	0.597	0.0186	['Aminoadipic acid', 'Acetylhomoserine', 'Glutamate, gamma-methyl ester']	C6H11NO4	HMDB00510;HMDB29423;HMDB61715	LMFA01170098;
1031	Silver	Polar metabolomics	Ag NP-NM300K 01h	485.7	0.589	0.0201
1032	Silver	Polar metabolomics	Ag NP-NM300K 01h	280.092	0.577	0.0315	['2,4-Undecadiene-8,10-diynoic acid 2,3-dehydropiperidide'];['Glycerophosphocholine']	C16H17NO;C8H20NO6P	HMDB33525;HMDB00086
1033	Silver	Polar metabolomics	Ag NP-NM300K 01h	612.073	0.572	0.0207
1034	Silver	Polar metabolomics	Ag NP-NM300K 01h	330.996	0.566	0.0133	['(S)-5-Diphosphomevalonic acid', '(R)-Mevalonic acid-5-pyrophosphate']	C6H14O10P2	HMDB01090;HMDB01981	LMFA01050416;
1035	Silver	Polar metabolomics	Ag NP-NM300K 01h	378.926	0.562	0.0177
1036	Silver	Polar metabolomics	Ag NP-NM300K 01h	582.604	0.562	0.0215
1037	Silver	Polar metabolomics	Ag NP-NM300K 01h	448.723	0.545	0.0174
1038	Silver	Polar metabolomics	Ag NP-NM300K 01h	535.662	0.515	0.0156
1039	Silver	Polar metabolomics	Ag NP-NM300K 01h	376.929	0.509	0.0151
1040	Silver	Polar metabolomics	Ag NP-NM300K 01h	576.633	0.508	0.0236
1041	Silver	Polar metabolomics	Ag NP-NM300K 01h	492.845	0.458	0.00683
1042	Silver	Polar metabolomics	Ag NP-NM300K 01h	191.048	0.33	0.0196
1043	Silver	Polar metabolomics	Ag NP-NM300K 01h	271.036	0.32	0.00369
1044	Silver	Polar metabolomics	Ag NP-NM300K 01h	531.386	0.229	0.0314
1045	Silver	Polar metabolomics	Ag NP-NM300K 01h	216.063	0.202	1.69e-07	['N-Methyl-1-deoxynojirimycin'];['Glycerylphosphorylethanolamine', 'sn-glycero-3-Phosphoethanolamine'];['Phenylacetylglycine', 'Methylhippuric acid', '2-Methylhippuric acid', 'm-Methylhippuric acid', 'p-Methylhippuric acid', 'Methyl n-acetylanthranilate', 'Betamipron', '3-Carbamoyl-2-phenylpropionaldehyde', '4-Hydroxy-5-phenyltetrahydro-1,3-oxazin-2-one', '4-Anilino-4-oxobutanoic acid']	C7H15NO4;C5H14NO6P;C10H11NO3	HMDB35360;HMDB00114;HMDB59660;HMDB00821;HMDB00859;HMDB11723;HMDB13245;HMDB13292;HMDB32388;HMDB34250;HMDB60366;HMDB60389;HMDB60758
1046	Silver	Polar metabolomics	Ag NP-NM300K 06h	122.027	9.999	0.000123	['L-Cysteine', 'D-Cysteine']	C3H7NO2S	HMDB00574;HMDB03417
1047	Silver	Polar metabolomics	Ag NP-NM300K 06h	319.136	7.329	0.00188
1048	Silver	Polar metabolomics	Ag NP-NM300K 06h	326.238	5.611	0.0448
1049	Silver	Polar metabolomics	Ag NP-NM300K 06h	325.235	5.372	0.044	['MG(0:0/14:0/0:0)', 'MG(14:0/0:0/0:0)']	C17H34O4	HMDB11530;HMDB11561
1050	Silver	Polar metabolomics	Ag NP-NM300K 06h	489.178	4.07	0.036
1051	Silver	Polar metabolomics	Ag NP-NM300K 06h	530.275	3.911	0.0378
1052	Silver	Polar metabolomics	Ag NP-NM300K 06h	134.027	3.586	0.00167
1053	Silver	Polar metabolomics	Ag NP-NM300K 06h	339.251	3.376	0.0409	['MG(0:0/15:0/0:0)', 'MG(15:0/0:0/0:0)', '(+)-15,16-Dihydroxyoctadecanoic acid', '(9S,10S)-9,10-dihydroxyoctadecanoate']	C18H36O4	HMDB11532;HMDB11563;HMDB31008;HMDB59633
1054	Silver	Polar metabolomics	Ag NP-NM300K 06h	489.168	3.358	0.0296	['Sofalcone']	C27H30O6	HMDB42013
1055	Silver	Polar metabolomics	Ag NP-NM300K 06h	340.254	3.324	0.0376
1056	Silver	Polar metabolomics	Ag NP-NM300K 06h	503.136	3.284	0.0286
1057	Silver	Polar metabolomics	Ag NP-NM300K 06h	298.984	3.254	0.0358
1058	Silver	Polar metabolomics	Ag NP-NM300K 06h	487.162	3.176	0.0394
1059	Silver	Polar metabolomics	Ag NP-NM300K 06h	488.165	3.099	0.0341
1060	Silver	Polar metabolomics	Ag NP-NM300K 06h	237.05	3.007	0.0224	['Cis-stilbene oxide']	C14H12O	HMDB59631
1061	Silver	Polar metabolomics	Ag NP-NM300K 06h	283.01	2.975	0.0296
1062	Silver	Polar metabolomics	Ag NP-NM300K 06h	315.037	2.905	0.0255
1063	Silver	Polar metabolomics	Ag NP-NM300K 06h	451.243	2.827	0.0484	[""5,8-Epoxy-5,8-dihydro-10'-apo-b,y-carotene-3,10'-diol"", ""5,6-Epoxy-5,6-dihydro-10'-apo-b,y-carotene-3,10'-diol""]	C27H38O3	HMDB39020;HMDB39021
1064	Silver	Polar metabolomics	Ag NP-NM300K 06h	284.014	2.776	0.0245
1065	Silver	Polar metabolomics	Ag NP-NM300K 06h	307.143	2.648	0.0399
1066	Silver	Polar metabolomics	Ag NP-NM300K 06h	484.361	2.568	0.0403
1067	Silver	Polar metabolomics	Ag NP-NM300K 06h	289.006	2.55	0.00784
1068	Silver	Polar metabolomics	Ag NP-NM300K 06h	419.183	2.528	0.0245	['[6]-Gingerdiol 3,5-diacetate'];[""(3'x,5'a,9'x,10'b)-O-(3-Hydroxy-6-oxo-7-drimen-11-yl)umbelliferone"", ""(S)-(E)-2'-(3,6-Dimethyl-2-heptenyl)-3',4',7-trihydroxyflavanone"", ""(S)-(E)-8-(3,6-Dimethyl-2-heptenyl)-4',5,7-trihydroxyflavanone""]	C21H32O6;C24H28O5	HMDB40568;HMDB39042;HMDB40305;HMDB40312
1069	Silver	Polar metabolomics	Ag NP-NM300K 06h	315.136	2.507	0.0449	['Cyclandelate', '[8]-Shogaol', 'Panaquinquecol 2', 'Ginsenoyne C', 'Ginsenoyne K', 'Panaquinquecol 7']	C17H24O3	HMDB15586;HMDB31463;HMDB38938;HMDB38994;HMDB40375;HMDB41201
1070	Silver	Polar metabolomics	Ag NP-NM300K 06h	205.024	2.493	0.0327	['(E)-1,11-Tridecadiene-3,5,7,9-tetrayne', '(Z)-1,3-Tridecadiene-5,7,9,11-tetrayne']	C13H8	HMDB33582;HMDB39109
1071	Silver	Polar metabolomics	Ag NP-NM300K 06h	256.98	2.38	0.0223
1072	Silver	Polar metabolomics	Ag NP-NM300K 06h	399.144	2.256	0.0341	['Dulxanthone E', ""5'-Methoxycurcumin""]	C22H22O7	HMDB34030;HMDB38921
1073	Silver	Polar metabolomics	Ag NP-NM300K 06h	133.002	2.14	0.0331
1074	Silver	Polar metabolomics	Ag NP-NM300K 06h	320.292	2.07	0.0287	['Tridemorph']	C19H39NO	HMDB31810
1075	Silver	Polar metabolomics	Ag NP-NM300K 06h	134.064	2.063	0.0361
1076	Silver	Polar metabolomics	Ag NP-NM300K 06h	133.069	1.992	0.0307
1077	Silver	Polar metabolomics	Ag NP-NM300K 06h	241.177	1.948	0.0243	['8,8-Dimethoxy-2,6-dimethyl-2-octanol']	C12H26O3	HMDB40219
1078	Silver	Polar metabolomics	Ag NP-NM300K 06h	331.224	1.942	0.0307	['Obtusilactone A', '3-Methyl-5-pentyl-2-furannonanoic acid', 'Annosquamosin B', '12,15-epoxy-13-methyleicosa-12,14-dienoic acid']	C19H32O3	HMDB30960;HMDB31091;HMDB31379;HMDB61646
1079	Silver	Polar metabolomics	Ag NP-NM300K 06h	121.069	1.908	0.0249
1080	Silver	Polar metabolomics	Ag NP-NM300K 06h	117.074	1.902	0.0358
1081	Silver	Polar metabolomics	Ag NP-NM300K 06h	332.949	1.84	0.0344
1082	Silver	Polar metabolomics	Ag NP-NM300K 06h	133.061	1.796	0.0322	['Ureidopropionic acid', 'L-Asparagine', 'Glycyl-glycine', 'N-Carbamoylsarcosine', 'D-Asparagine']	C4H8N2O3	HMDB00026;HMDB00168;HMDB11733;HMDB12265;HMDB33780
1083	Silver	Polar metabolomics	Ag NP-NM300K 06h	245.949	1.778	0.0205
1084	Silver	Polar metabolomics	Ag NP-NM300K 06h	242.18	1.771	0.0344
1085	Silver	Polar metabolomics	Ag NP-NM300K 06h	531.288	1.729	0.0238
1086	Silver	Polar metabolomics	Ag NP-NM300K 06h	293.879	1.681	0.0218
1087	Silver	Polar metabolomics	Ag NP-NM300K 06h	245.012	1.636	0.0344
1088	Silver	Polar metabolomics	Ag NP-NM300K 06h	295.876	1.628	0.0224
1089	Silver	Polar metabolomics	Ag NP-NM300K 06h	219.083	1.621	0.0113
1090	Silver	Polar metabolomics	Ag NP-NM300K 06h	188.07	1.61	0.022	['Indoleacrylic acid']	C11H9NO2	HMDB00734
1091	Silver	Polar metabolomics	Ag NP-NM300K 06h	317.06	1.609	0.0261
1092	Silver	Polar metabolomics	Ag NP-NM300K 06h	325.887	1.605	0.0222
1093	Silver	Polar metabolomics	Ag NP-NM300K 06h	237.918	1.601	0.0282
1094	Silver	Polar metabolomics	Ag NP-NM300K 06h	177.962	1.589	0.035
1095	Silver	Polar metabolomics	Ag NP-NM300K 06h	166.086	1.587	0.0297	['L-Phenylalanine', '3-Pyridinebutanoic acid', 'Benzocaine', 'Norsalsolinol', 'Gentiatibetine', 'Ethyl 2-aminobenzoate', 'Methyl N-methylanthranilate', 'Benzyl glycinate']	C9H11NO2	HMDB00159;HMDB01007;HMDB04992;HMDB06044;HMDB33485;HMDB33589;HMDB34169;HMDB59934
1096	Silver	Polar metabolomics	Ag NP-NM300K 06h	118.075	1.583	0.0262
1097	Silver	Polar metabolomics	Ag NP-NM300K 06h	251.894	1.572	0.0353
1098	Silver	Polar metabolomics	Ag NP-NM300K 06h	167.09	1.559	0.0413
1099	Silver	Polar metabolomics	Ag NP-NM300K 06h	205.097	1.559	0.0296	['L-Tryptophan', 'D-Tryptophan', '3-Hydroxymethylantipyrine', 'Ethotoin', 'Nirvanol', '4-Hydroxyantipyrine', 'S-nirvanol']	C11H12N2O2	HMDB00929;HMDB13609;HMDB13840;HMDB14892;HMDB60533;HMDB60878;HMDB60967
1100	Silver	Polar metabolomics	Ag NP-NM300K 06h	205.068	1.55	0.00167	['Galactitol', 'Sorbitol', 'Mannitol', 'L-Iditol']	C6H14O6	HMDB00107;HMDB00247;HMDB00765;HMDB11632
1101	Silver	Polar metabolomics	Ag NP-NM300K 06h	176.122	1.549	0.0233
1102	Silver	Polar metabolomics	Ag NP-NM300K 06h	298.097	1.548	0.0307	[""5'-Methylthioadenosine""]	C11H15N5O3S	HMDB01173
1103	Silver	Polar metabolomics	Ag NP-NM300K 06h	292.261	1.547	0.0223	['Capsiamide']	C17H35NO	HMDB40940
1104	Silver	Polar metabolomics	Ag NP-NM300K 06h	318.965	1.541	0.0333
1105	Silver	Polar metabolomics	Ag NP-NM300K 06h	329.928	1.541	0.0282
1106	Silver	Polar metabolomics	Ag NP-NM300K 06h	370.916	1.539	0.046
1107	Silver	Polar metabolomics	Ag NP-NM300K 06h	323.89	1.533	0.0206
1108	Silver	Polar metabolomics	Ag NP-NM300K 06h	466.818	1.531	0.0255
1109	Silver	Polar metabolomics	Ag NP-NM300K 06h	239.962	1.526	0.0493
1110	Silver	Polar metabolomics	Ag NP-NM300K 06h	267.928	1.526	0.0249
1111	Silver	Polar metabolomics	Ag NP-NM300K 06h	265.931	1.525	0.0224
1112	Silver	Polar metabolomics	Ag NP-NM300K 06h	327.931	1.518	0.0266
1113	Silver	Polar metabolomics	Ag NP-NM300K 06h	175.119	1.513	0.0262	['L-Arginine', 'D-Arginine']	C6H14N4O2	HMDB00517;HMDB03416
1114	Silver	Polar metabolomics	Ag NP-NM300K 06h	299.1	1.513	0.044	['L-gamma-glutamyl-L-isoleucine ', 'L-gamma-glutamyl-L-leucine ']	C11H20N2O5	HMDB11170;HMDB11171
1115	Silver	Polar metabolomics	Ag NP-NM300K 06h	134.109	1.512	0.0344
1116	Silver	Polar metabolomics	Ag NP-NM300K 06h	227.05	1.512	0.00167	['5-(2-Methylpropyl)tetrahydro-2-oxo-3-furancarboxylic acid', '5-Butyltetrahydro-2-oxo-3-furancarboxylic acid']	C9H14O4	HMDB30988;HMDB30992
1117	Silver	Polar metabolomics	Ag NP-NM300K 06h	117.068	1.51	0.0406	['1-Methyl-1,3-cyclohexadiene', '2-Methyl-1,3-cyclohexadiene', '(3E,5Z)-1,3,5-Heptatriene']	C7H10	HMDB31532;HMDB32395;HMDB61889
1118	Silver	Polar metabolomics	Ag NP-NM300K 06h	292.942	1.506	0.0281
1119	Silver	Polar metabolomics	Ag NP-NM300K 06h	191.077	1.501	0.0251
1120	Silver	Polar metabolomics	Ag NP-NM300K 06h	273.055	1.5	0.0151	['Glycerol 1-propanoate diacetate'];['2-[(5-Methylsulfinyl)-4-penten-2-ynylidene]-1,6-dioxaspiro[4.4]non-3-ene']	C10H16O6;C13H14O3S	HMDB31640;HMDB32670
1121	Silver	Polar metabolomics	Ag NP-NM300K 06h	234.983	1.496	0.0224
1122	Silver	Polar metabolomics	Ag NP-NM300K 06h	120.003	1.489	0.0449
1123	Silver	Polar metabolomics	Ag NP-NM300K 06h	221.042	1.487	0.00784	['Galactitol', 'Sorbitol', 'Mannitol', 'L-Iditol'];['Vanillylmandelic acid', 'Syringic acid', '3-(3,4-Dihydroxyphenyl)lactic acid', '3-Hydroxy-4-methoxymandelate', 'Ethyl gallate', '3,4-O-Dimethylgallic acid']	C6H14O6;C9H10O5	HMDB00107;HMDB00247;HMDB00765;HMDB11632;HMDB00291;HMDB02085;HMDB03503;HMDB29170;HMDB33836;HMDB41662
1124	Silver	Polar metabolomics	Ag NP-NM300K 06h	192.999	1.485	0.0462
1125	Silver	Polar metabolomics	Ag NP-NM300K 06h	308.916	1.484	0.0475
1126	Silver	Polar metabolomics	Ag NP-NM300K 06h	350.901	1.482	0.0335
1127	Silver	Polar metabolomics	Ag NP-NM300K 06h	133.099	1.479	0.035	['1,3-Octadiene', '2-(Methylenebutyl)-cyclopropane', '2,4-Octadiene', 'Dimethylhexa-1,4-diene', '2,5-Dimethyl-2,4-hexadiene']	C8H14	HMDB40966;HMDB61899;HMDB61900;HMDB61901;HMDB61902
1128	Silver	Polar metabolomics	Ag NP-NM300K 06h	223.04	1.478	0.0158	['Galactitol', 'Sorbitol', 'Mannitol', 'L-Iditol']	C6H14O6	HMDB00107;HMDB00247;HMDB00765;HMDB11632
1129	Silver	Polar metabolomics	Ag NP-NM300K 06h	150.014	1.472	0.0223	['4-Aminophenol', '2-Acetylpyrrole', '1-Methyl-2-pyrrolecarboxaldehyde']	C6H7NO	HMDB01169;HMDB35882;HMDB40582
1130	Silver	Polar metabolomics	Ag NP-NM300K 06h	319.034	1.462	0.0484	['Methoxybrassenin A']	C13H16N2OS2	HMDB38635
1131	Silver	Polar metabolomics	Ag NP-NM300K 06h	104.053	1.46	0.0428
1132	Silver	Polar metabolomics	Ag NP-NM300K 06h	150.058	1.459	0.048	['L-Methionine', 'Penicillamine', 'Racemethionine']	C5H11NO2S	HMDB00696;HMDB14997;HMDB33951
1133	Silver	Polar metabolomics	Ag NP-NM300K 06h	320.985	1.458	0.0127
1134	Silver	Polar metabolomics	Ag NP-NM300K 06h	178.028	1.448	0.0406
1135	Silver	Polar metabolomics	Ag NP-NM300K 06h	156.046	1.445	0.0408
1136	Silver	Polar metabolomics	Ag NP-NM300K 06h	207.972	1.445	0.0281
1137	Silver	Polar metabolomics	Ag NP-NM300K 06h	236.98	1.445	0.0317
1138	Silver	Polar metabolomics	Ag NP-NM300K 06h	528.072	1.44	0.0257
1139	Silver	Polar metabolomics	Ag NP-NM300K 06h	132.102	1.439	0.046	['L-Isoleucine', 'L-Alloisoleucine', 'L-Leucine', 'L-Norleucine', 'Aminocaproic acid', 'Beta-Leucine', 'D-Leucine', '3-Aminocaproic acid', '6-Deoxyfagomine', 'N-(2-Hydroxyethyl)-morpholine', 'N-methylvaline']	C6H13NO2	HMDB00172;HMDB00557;HMDB00687;HMDB01645;HMDB01901;HMDB03640;HMDB13773;HMDB29168;HMDB36382;HMDB60650;HMDB61716	LMFA01100047;LMFA01100042;LMFA01100035;
1140	Silver	Polar metabolomics	Ag NP-NM300K 06h	269.972	1.436	0.0408
1141	Silver	Polar metabolomics	Ag NP-NM300K 06h	151.062	1.435	0.0484	['7-Methylhypoxanthine', '1-Methylhypoxanthine ']	C6H6N4O	HMDB03162;HMDB13141
1142	Silver	Polar metabolomics	Ag NP-NM300K 06h	296.983	1.435	0.0485
1143	Silver	Polar metabolomics	Ag NP-NM300K 06h	263.027	1.42	0.0148
1144	Silver	Polar metabolomics	Ag NP-NM300K 06h	155.043	1.415	0.0439	['Ureidopropionic acid', 'L-Asparagine', 'Glycyl-glycine', 'N-Carbamoylsarcosine', 'D-Asparagine']	C4H8N2O3	HMDB00026;HMDB00168;HMDB11733;HMDB12265;HMDB33780
1145	Silver	Polar metabolomics	Ag NP-NM300K 06h	223.985	1.413	0.0164
1146	Silver	Polar metabolomics	Ag NP-NM300K 06h	306.276	1.408	0.0341	['Octadecanamide']	C18H37NO	HMDB34146
1147	Silver	Polar metabolomics	Ag NP-NM300K 06h	241.11	1.407	0.0148
1148	Silver	Polar metabolomics	Ag NP-NM300K 06h	110.027	1.397	0.0297	['Hypotaurine']	C2H7NO2S	HMDB00965
1149	Silver	Polar metabolomics	Ag NP-NM300K 06h	279.001	1.396	0.0411
1150	Silver	Polar metabolomics	Ag NP-NM300K 06h	508.885	1.394	0.000771
1151	Silver	Polar metabolomics	Ag NP-NM300K 06h	177.025	1.38	0.0427	['N-Methylnicotinamide', '2-Acetyl-3-methylpyrazine', '2-Aminobenzamide', '4-Acetyl-2-methylpyrimidine', '2-Methylnicotinamide']	C7H8N2O	HMDB03152;HMDB30001;HMDB33947;HMDB37819;HMDB59711
1152	Silver	Polar metabolomics	Ag NP-NM300K 06h	240.105	1.38	0.0242
1153	Silver	Polar metabolomics	Ag NP-NM300K 06h	119.09	1.373	0.0307
1154	Silver	Polar metabolomics	Ag NP-NM300K 06h	241.101	1.367	0.022
1155	Silver	Polar metabolomics	Ag NP-NM300K 06h	164.03	1.359	0.0485	['p-Anisidine', '2-Propionylpyrrole', '4-Hydroxybenzylamine', '1-Ethyl-1H-pyrrole-2-carboxaldehyde', '2-Acetyl-1-methylpyrrole']	C7H9NO	HMDB29300;HMDB32492;HMDB32578;HMDB36058;HMDB40360
1156	Silver	Polar metabolomics	Ag NP-NM300K 06h	289.975	1.359	0.0245
1157	Silver	Polar metabolomics	Ag NP-NM300K 06h	240.109	1.351	0.022	['Dihydrobiopterin', '6-Lactoyltetrahydropterin', '4a-Carbinolamine tetrahydrobiopterin', ""O2'-4a-cyclic-tetrahydrobiopterin"", '1-hydroxy-2-Oxopropyl tetrahydropterin']	C9H13N5O3	HMDB00038;HMDB02065;HMDB02215;HMDB13031;HMDB13642
1158	Silver	Polar metabolomics	Ag NP-NM300K 06h	200.041	1.333	0.0408
1159	Silver	Polar metabolomics	Ag NP-NM300K 06h	526.93	1.323	0.0353
1160	Silver	Polar metabolomics	Ag NP-NM300K 06h	279.946	1.311	0.0336
1161	Silver	Polar metabolomics	Ag NP-NM300K 06h	240.103	1.306	0.0215
1162	Silver	Polar metabolomics	Ag NP-NM300K 06h	281.943	1.306	0.0313
1163	Silver	Polar metabolomics	Ag NP-NM300K 06h	241.112	1.303	0.0379
1164	Silver	Polar metabolomics	Ag NP-NM300K 06h	524.933	1.291	0.0427
1165	Silver	Polar metabolomics	Ag NP-NM300K 06h	228.063	1.246	0.022	['N-Methylcalystegine B2'];['Indolelactic acid', '5-Methoxyindoleacetate', 'Cinnamoylglycine', 'Edulitine', 'Methyl 1-methoxy-1H-indole-3-carboxylate', '3-Indolehydracrylic acid']	C8H15NO4;C11H11NO3	HMDB36604;HMDB00671;HMDB04096;HMDB11621;HMDB30179;HMDB32755;HMDB59765
1166	Silver	Polar metabolomics	Ag NP-NM300K 06h	205.047	1.238	0.0346	['1-Deoxy-D-glucitol'];['Homovanillic acid', 'Isohomovanillic acid', '3,4-Dihydroxyhydrocinnamic acid', 'Hydroxyphenyllactic acid', '3-(3-Hydroxyphenyl)-3-hydroxypropanoic acid', '3-Methoxy-4-hydroxyphenylglycolaldehyde', '3-Hydroxyphenyllactate', '2,6-Dimethoxybenzoic acid', ""2',6'-Dihydroxy-4'-methoxyacetophenone"", 'Maltol propionate', ""2',4'-Dihydroxy-6'-methoxyacetophenone"", '3,4-Dimethox…	C6H14O5;C9H10O4	HMDB41500;HMDB00118;HMDB00333;HMDB00423;HMDB00755;HMDB02643;HMDB04061;HMDB29232;HMDB29273;HMDB29646;HMDB37274;HMDB41270;HMDB59763
1167	Silver	Polar metabolomics	Ag NP-NM300K 06h	220.086	1.235	0.0376
1168	Silver	Polar metabolomics	Ag NP-NM300K 06h	400.984	1.185	0.022
1169	Silver	Polar metabolomics	Ag NP-NM300K 06h	492.922	1.172	0.0377
1170	Silver	Polar metabolomics	Ag NP-NM300K 06h	404.032	1.162	0.035
1171	Silver	Polar metabolomics	Ag NP-NM300K 06h	482.969	1.158	0.00365
1172	Silver	Polar metabolomics	Ag NP-NM300K 06h	456.946	1.145	0.044
1173	Silver	Polar metabolomics	Ag NP-NM300K 06h	494.919	1.132	0.0364
1174	Silver	Polar metabolomics	Ag NP-NM300K 06h	436.961	1.121	0.0353
1175	Silver	Polar metabolomics	Ag NP-NM300K 06h	276.878	0.879	0.0307
1176	Silver	Polar metabolomics	Ag NP-NM300K 06h	278.875	0.876	0.0281
1177	Silver	Polar metabolomics	Ag NP-NM300K 06h	274.881	0.867	0.0413
1178	Silver	Polar metabolomics	Ag NP-NM300K 06h	334.837	0.867	0.0485
1179	Silver	Polar metabolomics	Ag NP-NM300K 06h	332.84	0.866	0.0411
1180	Silver	Polar metabolomics	Ag NP-NM300K 06h	362.785	0.864	0.0366
1181	Silver	Polar metabolomics	Ag NP-NM300K 06h	177.033	0.858	0.0307
1182	Silver	Polar metabolomics	Ag NP-NM300K 06h	487.892	0.849	0.0462
1183	Silver	Polar metabolomics	Ag NP-NM300K 06h	461.869	0.845	0.0484
1184	Silver	Polar metabolomics	Ag NP-NM300K 06h	403.91	0.842	0.0485
1185	Silver	Polar metabolomics	Ag NP-NM300K 06h	246.867	0.84	0.022
1186	Silver	Polar metabolomics	Ag NP-NM300K 06h	270.797	0.838	0.0329
1187	Silver	Polar metabolomics	Ag NP-NM300K 06h	406.793	0.837	0.0135
1188	Silver	Polar metabolomics	Ag NP-NM300K 06h	277.882	0.836	0.0327
1189	Silver	Polar metabolomics	Ag NP-NM300K 06h	336.834	0.836	0.0307
1190	Silver	Polar metabolomics	Ag NP-NM300K 06h	244.87	0.833	0.0218
1191	Silver	Polar metabolomics	Ag NP-NM300K 06h	534.647	0.833	0.0462
1192	Silver	Polar metabolomics	Ag NP-NM300K 06h	262.841	0.832	0.043
1193	Silver	Polar metabolomics	Ag NP-NM300K 06h	392.753	0.832	0.0216
1194	Silver	Polar metabolomics	Ag NP-NM300K 06h	418.73	0.831	0.0262
1195	Silver	Polar metabolomics	Ag NP-NM300K 06h	352.877	0.83	0.0346
1196	Silver	Polar metabolomics	Ag NP-NM300K 06h	476.689	0.83	0.0141
1197	Silver	Polar metabolomics	Ag NP-NM300K 06h	448.715	0.828	0.0218
1198	Silver	Polar metabolomics	Ag NP-NM300K 06h	470.697	0.827	0.0233
1199	Silver	Polar metabolomics	Ag NP-NM300K 06h	515.978	0.825	0.0465
1200	Silver	Polar metabolomics	Ag NP-NM300K 06h	360.788	0.824	0.0148
1201	Silver	Polar metabolomics	Ag NP-NM300K 06h	304.826	0.823	0.0201
1202	Silver	Polar metabolomics	Ag NP-NM300K 06h	306.823	0.823	0.0141
1203	Silver	Polar metabolomics	Ag NP-NM300K 06h	428.74	0.823	0.0249
1204	Silver	Polar metabolomics	Ag NP-NM300K 06h	400.759	0.822	0.0282
1205	Silver	Polar metabolomics	Ag NP-NM300K 06h	452.709	0.822	0.0344
1206	Silver	Polar metabolomics	Ag NP-NM300K 06h	454.723	0.822	0.0484
1207	Silver	Polar metabolomics	Ag NP-NM300K 06h	532.65	0.822	0.0404
1208	Silver	Polar metabolomics	Ag NP-NM300K 06h	302.829	0.821	0.0112
1209	Silver	Polar metabolomics	Ag NP-NM300K 06h	408.79	0.821	0.0127
1210	Silver	Polar metabolomics	Ag NP-NM300K 06h	272.795	0.82	0.0307
1211	Silver	Polar metabolomics	Ag NP-NM300K 06h	291.879	0.82	0.0307
1212	Silver	Polar metabolomics	Ag NP-NM300K 06h	299.96	0.819	0.0402
1213	Silver	Polar metabolomics	Ag NP-NM300K 06h	427.937	0.819	0.0296
1214	Silver	Polar metabolomics	Ag NP-NM300K 06h	328.802	0.816	0.0297
1215	Silver	Polar metabolomics	Ag NP-NM300K 06h	464.752	0.816	0.0223
1216	Silver	Polar metabolomics	Ag NP-NM300K 06h	436.783	0.814	0.0344
1217	Silver	Polar metabolomics	Ag NP-NM300K 06h	348.835	0.813	0.0283
1218	Silver	Polar metabolomics	Ag NP-NM300K 06h	484.741	0.813	0.0205
1219	Silver	Polar metabolomics	Ag NP-NM300K 06h	524.707	0.813	0.022
1220	Silver	Polar metabolomics	Ag NP-NM300K 06h	90.9765	0.813	0.0398
1221	Silver	Polar metabolomics	Ag NP-NM300K 06h	450.712	0.812	0.022
1222	Silver	Polar metabolomics	Ag NP-NM300K 06h	496.739	0.812	0.0462
1223	Silver	Polar metabolomics	Ag NP-NM300K 06h	480.747	0.81	0.0148
1224	Silver	Polar metabolomics	Ag NP-NM300K 06h	138.906	0.809	0.0344
1225	Silver	Polar metabolomics	Ag NP-NM300K 06h	463.913	0.809	0.0346
1226	Silver	Polar metabolomics	Ag NP-NM300K 06h	466.749	0.809	0.0224
1227	Silver	Polar metabolomics	Ag NP-NM300K 06h	474.691	0.809	0.0148
1228	Silver	Polar metabolomics	Ag NP-NM300K 06h	290.876	0.808	0.0338
1229	Silver	Polar metabolomics	Ag NP-NM300K 06h	322.811	0.808	0.022
1230	Silver	Polar metabolomics	Ag NP-NM300K 06h	149.939	0.807	0.0353
1231	Silver	Polar metabolomics	Ag NP-NM300K 06h	215.042	0.807	0.0485
1232	Silver	Polar metabolomics	Ag NP-NM300K 06h	528.701	0.807	0.0343
1233	Silver	Polar metabolomics	Ag NP-NM300K 06h	320.8	0.806	0.0224
1234	Silver	Polar metabolomics	Ag NP-NM300K 06h	468.683	0.806	0.0462
1235	Silver	Polar metabolomics	Ag NP-NM300K 06h	482.744	0.806	0.0148
1236	Silver	Polar metabolomics	Ag NP-NM300K 06h	468.746	0.805	0.0218
1237	Silver	Polar metabolomics	Ag NP-NM300K 06h	530.653	0.805	0.0366
1238	Silver	Polar metabolomics	Ag NP-NM300K 06h	292.873	0.804	0.0199
1239	Silver	Polar metabolomics	Ag NP-NM300K 06h	316.824	0.803	0.0224
1240	Silver	Polar metabolomics	Ag NP-NM300K 06h	322.845	0.802	0.0353
1241	Silver	Polar metabolomics	Ag NP-NM300K 06h	202.856	0.801	0.0441
1242	Silver	Polar metabolomics	Ag NP-NM300K 06h	376.78	0.801	0.0296
1243	Silver	Polar metabolomics	Ag NP-NM300K 06h	148.935	0.8	0.0307
1244	Silver	Polar metabolomics	Ag NP-NM300K 06h	241.029	0.8	0.0307
1245	Silver	Polar metabolomics	Ag NP-NM300K 06h	142.901	0.799	0.0317
1246	Silver	Polar metabolomics	Ag NP-NM300K 06h	338.806	0.799	0.0223
1247	Silver	Polar metabolomics	Ag NP-NM300K 06h	206.894	0.798	0.022
1248	Silver	Polar metabolomics	Ag NP-NM300K 06h	224.865	0.798	0.0382
1249	Silver	Polar metabolomics	Ag NP-NM300K 06h	306.871	0.798	0.0223
1250	Silver	Polar metabolomics	Ag NP-NM300K 06h	396.764	0.798	0.0249
1251	Silver	Polar metabolomics	Ag NP-NM300K 06h	528.656	0.798	0.025
1252	Silver	Polar metabolomics	Ag NP-NM300K 06h	183.026	0.797	0.0102	['Oxoadipic acid', '3-Oxoadipic acid', '2-Methyl-4-oxopentanedioic acid', '3-Methyl-3-hydroxypentanedioate']	C6H8O5	HMDB00225;HMDB00398;HMDB39447;HMDB59737	LMFA01170121;LMFA01170096;
1253	Silver	Polar metabolomics	Ag NP-NM300K 06h	226.862	0.797	0.0485
1254	Silver	Polar metabolomics	Ag NP-NM300K 06h	526.704	0.797	0.0187
1255	Silver	Polar metabolomics	Ag NP-NM300K 06h	432.999	0.796	0.0378
1256	Silver	Polar metabolomics	Ag NP-NM300K 06h	489.954	0.796	0.0273
1257	Silver	Polar metabolomics	Ag NP-NM300K 06h	326.805	0.795	0.0187
1258	Silver	Polar metabolomics	Ag NP-NM300K 06h	332.798	0.795	0.0361
1259	Silver	Polar metabolomics	Ag NP-NM300K 06h	334.795	0.795	0.0484
1260	Silver	Polar metabolomics	Ag NP-NM300K 06h	398.761	0.795	0.0196
1261	Silver	Polar metabolomics	Ag NP-NM300K 06h	518.652	0.795	0.0341
1262	Silver	Polar metabolomics	Ag NP-NM300K 06h	140.904	0.794	0.0353
1263	Silver	Polar metabolomics	Ag NP-NM300K 06h	223.871	0.794	0.0238
1264	Silver	Polar metabolomics	Ag NP-NM300K 06h	442.722	0.794	0.044
1265	Silver	Polar metabolomics	Ag NP-NM300K 06h	98.9198	0.794	0.035
1266	Silver	Polar metabolomics	Ag NP-NM300K 06h	150.932	0.793	0.0378
1267	Silver	Polar metabolomics	Ag NP-NM300K 06h	208.891	0.793	0.0205
1268	Silver	Polar metabolomics	Ag NP-NM300K 06h	300.816	0.793	0.0171
1269	Silver	Polar metabolomics	Ag NP-NM300K 06h	374.782	0.793	0.0388
1270	Silver	Polar metabolomics	Ag NP-NM300K 06h	438.78	0.793	0.023
1271	Silver	Polar metabolomics	Ag NP-NM300K 06h	325.812	0.791	0.0242
1272	Silver	Polar metabolomics	Ag NP-NM300K 06h	384.763	0.791	0.0203
1273	Silver	Polar metabolomics	Ag NP-NM300K 06h	222.868	0.79	0.046
1274	Silver	Polar metabolomics	Ag NP-NM300K 06h	270.843	0.79	0.0224
1275	Silver	Polar metabolomics	Ag NP-NM300K 06h	318.821	0.79	0.0327
1276	Silver	Polar metabolomics	Ag NP-NM300K 06h	424.785	0.79	0.0141
1277	Silver	Polar metabolomics	Ag NP-NM300K 06h	484.72	0.79	0.0413
1278	Silver	Polar metabolomics	Ag NP-NM300K 06h	514.658	0.79	0.0331
1279	Silver	Polar metabolomics	Ag NP-NM300K 06h	324.808	0.789	0.0218
1280	Silver	Polar metabolomics	Ag NP-NM300K 06h	380.77	0.789	0.022
1281	Silver	Polar metabolomics	Ag NP-NM300K 06h	472.694	0.789	0.0245
1282	Silver	Polar metabolomics	Ag NP-NM300K 06h	267.853	0.788	0.0323
1283	Silver	Polar metabolomics	Ag NP-NM300K 06h	422.788	0.788	0.0131
1284	Silver	Polar metabolomics	Ag NP-NM300K 06h	98.9188	0.788	0.0493
1285	Silver	Polar metabolomics	Ag NP-NM300K 06h	210.888	0.787	0.0148
1286	Silver	Polar metabolomics	Ag NP-NM300K 06h	382.766	0.786	0.0245
1287	Silver	Polar metabolomics	Ag NP-NM300K 06h	428.712	0.786	0.0362
1288	Silver	Polar metabolomics	Ag NP-NM300K 06h	516.723	0.786	0.0238
1289	Silver	Polar metabolomics	Ag NP-NM300K 06h	520.717	0.785	0.0361
1290	Silver	Polar metabolomics	Ag NP-NM300K 06h	491.951	0.784	0.0351
1291	Silver	Polar metabolomics	Ag NP-NM300K 06h	522.71	0.784	0.0127
1292	Silver	Polar metabolomics	Ag NP-NM300K 06h	318.803	0.783	0.0331
1293	Silver	Polar metabolomics	Ag NP-NM300K 06h	268.846	0.782	0.0199
1294	Silver	Polar metabolomics	Ag NP-NM300K 06h	518.72	0.782	0.0224
1295	Silver	Polar metabolomics	Ag NP-NM300K 06h	278.923	0.781	0.0283
1296	Silver	Polar metabolomics	Ag NP-NM300K 06h	282.844	0.781	0.0218
1297	Silver	Polar metabolomics	Ag NP-NM300K 06h	340.803	0.781	0.0148
1298	Silver	Polar metabolomics	Ag NP-NM300K 06h	350.832	0.781	0.022
1299	Silver	Polar metabolomics	Ag NP-NM300K 06h	458.697	0.781	0.0224
1300	Silver	Polar metabolomics	Ag NP-NM300K 06h	416.733	0.78	0.00365
1301	Silver	Polar metabolomics	Ag NP-NM300K 06h	512.661	0.78	0.0323
1302	Silver	Polar metabolomics	Ag NP-NM300K 06h	342.8	0.779	0.016
1303	Silver	Polar metabolomics	Ag NP-NM300K 06h	440.759	0.779	0.0307
1304	Silver	Polar metabolomics	Ag NP-NM300K 06h	482.723	0.779	0.0331
1305	Silver	Polar metabolomics	Ag NP-NM300K 06h	224.886	0.778	0.0255
1306	Silver	Polar metabolomics	Ag NP-NM300K 06h	266.849	0.778	0.0159
1307	Silver	Polar metabolomics	Ag NP-NM300K 06h	443.929	0.778	0.0468
1308	Silver	Polar metabolomics	Ag NP-NM300K 06h	264.852	0.777	0.0182
1309	Silver	Polar metabolomics	Ag NP-NM300K 06h	480.726	0.777	0.0282
1310	Silver	Polar metabolomics	Ag NP-NM300K 06h	532.697	0.777	0.022
1311	Silver	Polar metabolomics	Ag NP-NM300K 06h	386.761	0.776	0.0203
1312	Silver	Polar metabolomics	Ag NP-NM300K 06h	438.762	0.775	0.022
1313	Silver	Polar metabolomics	Ag NP-NM300K 06h	456.799	0.775	0.0307
1314	Silver	Polar metabolomics	Ag NP-NM300K 06h	460.694	0.775	0.022
1315	Silver	Polar metabolomics	Ag NP-NM300K 06h	100.917	0.774	0.0361
1316	Silver	Polar metabolomics	Ag NP-NM300K 06h	262.859	0.774	0.0353
1317	Silver	Polar metabolomics	Ag NP-NM300K 06h	320.818	0.774	0.022
1318	Silver	Polar metabolomics	Ag NP-NM300K 06h	258.865	0.773	0.0341
1319	Silver	Polar metabolomics	Ag NP-NM300K 06h	296.821	0.772	0.0282
1320	Silver	Polar metabolomics	Ag NP-NM300K 06h	364.829	0.772	0.0262
1321	Silver	Polar metabolomics	Ag NP-NM300K 06h	433.993	0.772	0.0344
1322	Silver	Polar metabolomics	Ag NP-NM300K 06h	321.972	0.771	0.0411
1323	Silver	Polar metabolomics	Ag NP-NM300K 06h	322.862	0.771	0.0281
1324	Silver	Polar metabolomics	Ag NP-NM300K 06h	469.02	0.77	0.0223
1325	Silver	Polar metabolomics	Ag NP-NM300K 06h	406.73	0.769	0.0484
1326	Silver	Polar metabolomics	Ag NP-NM300K 06h	222.889	0.768	0.0262
1327	Silver	Polar metabolomics	Ag NP-NM300K 06h	462.759	0.768	0.0151
1328	Silver	Polar metabolomics	Ag NP-NM300K 06h	534.694	0.768	0.0127
1329	Silver	Polar metabolomics	Ag NP-NM300K 06h	358.774	0.767	0.0215
1330	Silver	Polar metabolomics	Ag NP-NM300K 06h	414.735	0.767	0.022
1331	Silver	Polar metabolomics	Ag NP-NM300K 06h	338.785	0.766	0.0269
1332	Silver	Polar metabolomics	Ag NP-NM300K 06h	458.765	0.766	0.0151
1333	Silver	Polar metabolomics	Ag NP-NM300K 06h	493.948	0.766	0.0473
1334	Silver	Polar metabolomics	Ag NP-NM300K 06h	260.862	0.765	0.0411
1335	Silver	Polar metabolomics	Ag NP-NM300K 06h	224.893	0.764	0.0461
1336	Silver	Polar metabolomics	Ag NP-NM300K 06h	284.841	0.763	0.0219
1337	Silver	Polar metabolomics	Ag NP-NM300K 06h	398.741	0.762	0.0148
1338	Silver	Polar metabolomics	Ag NP-NM300K 06h	400.738	0.762	0.0148
1339	Silver	Polar metabolomics	Ag NP-NM300K 06h	412.738	0.761	0.0112
1340	Silver	Polar metabolomics	Ag NP-NM300K 06h	431.996	0.761	0.0358
1341	Silver	Polar metabolomics	Ag NP-NM300K 06h	265.856	0.76	0.0215
1342	Silver	Polar metabolomics	Ag NP-NM300K 06h	280.847	0.76	0.022
1343	Silver	Polar metabolomics	Ag NP-NM300K 06h	298.818	0.76	0.0341
1344	Silver	Polar metabolomics	Ag NP-NM300K 06h	286.818	0.759	0.0344
1345	Silver	Polar metabolomics	Ag NP-NM300K 06h	340.782	0.759	0.0187
1346	Silver	Polar metabolomics	Ag NP-NM300K 06h	424.765	0.758	0.0368
1347	Silver	Polar metabolomics	Ag NP-NM300K 06h	500.715	0.758	0.0151
1348	Silver	Polar metabolomics	Ag NP-NM300K 06h	280.826	0.757	0.0376
1349	Silver	Polar metabolomics	Ag NP-NM300K 06h	282.823	0.757	0.0192
1350	Silver	Polar metabolomics	Ag NP-NM300K 06h	337.946	0.757	0.0487
1351	Silver	Polar metabolomics	Ag NP-NM300K 06h	356.777	0.757	0.0485
1352	Silver	Polar metabolomics	Ag NP-NM300K 06h	158.874	0.756	0.022
1353	Silver	Polar metabolomics	Ag NP-NM300K 06h	375.041	0.756	0.0378
1354	Silver	Polar metabolomics	Ag NP-NM300K 06h	216.015	0.755	0.0353	['Phosphocreatinine']	C4H8N3O4P	HMDB41624
1355	Silver	Polar metabolomics	Ag NP-NM300K 06h	417.887	0.755	0.0482
1356	Silver	Polar metabolomics	Ag NP-NM300K 06h	498.718	0.755	0.022
1357	Silver	Polar metabolomics	Ag NP-NM300K 06h	109.062	0.754	0.0344	['Iso-Valeraldehyde', 'Prenol', '3-Methyl-3-buten-1-ol', 'Pentanal', '(S)-2-Methylbutanal', '(E)-2-Penten-1-ol', '1-Penten-3-ol', 'Isoprenyl alcohol', '2-Pentanone', '2-Methyl-2-buten-1-ol', 'xi-3-Methyl-3-buten-2-ol']	C5H10O	HMDB06478;HMDB30124;HMDB30126;HMDB31206;HMDB31525;HMDB31604;HMDB31605;HMDB33854;HMDB34235;HMDB34465;HMDB39779
1358	Silver	Polar metabolomics	Ag NP-NM300K 06h	342.779	0.754	0.0368
1359	Silver	Polar metabolomics	Ag NP-NM300K 06h	200.907	0.753	0.0297
1360	Silver	Polar metabolomics	Ag NP-NM300K 06h	284.82	0.753	0.025
1361	Silver	Polar metabolomics	Ag NP-NM300K 06h	344.845	0.753	0.022
1362	Silver	Polar metabolomics	Ag NP-NM300K 06h	378.824	0.752	0.025
1363	Silver	Polar metabolomics	Ag NP-NM300K 06h	400.806	0.752	0.0187
1364	Silver	Polar metabolomics	Ag NP-NM300K 06h	165.934	0.751	0.0212
1365	Silver	Polar metabolomics	Ag NP-NM300K 06h	80.9479	0.751	0.0227
1366	Silver	Polar metabolomics	Ag NP-NM300K 06h	218.878	0.75	0.0406
1367	Silver	Polar metabolomics	Ag NP-NM300K 06h	402.735	0.75	0.0164
1368	Silver	Polar metabolomics	Ag NP-NM300K 06h	474.739	0.749	0.0202
1369	Silver	Polar metabolomics	Ag NP-NM300K 06h	82.9449	0.749	0.022
1370	Silver	Polar metabolomics	Ag NP-NM300K 06h	320.865	0.748	0.0231
1371	Silver	Polar metabolomics	Ag NP-NM300K 06h	336.839	0.747	0.0462
1372	Silver	Polar metabolomics	Ag NP-NM300K 06h	345.951	0.747	0.0406
1373	Silver	Polar metabolomics	Ag NP-NM300K 06h	402.803	0.747	0.022
1374	Silver	Polar metabolomics	Ag NP-NM300K 06h	454.754	0.747	0.0401
1375	Silver	Polar metabolomics	Ag NP-NM300K 06h	344.776	0.743	0.0302
1376	Silver	Polar metabolomics	Ag NP-NM300K 06h	476.736	0.743	0.0203
1377	Silver	Polar metabolomics	Ag NP-NM300K 06h	526.642	0.743	0.0347
1378	Silver	Polar metabolomics	Ag NP-NM300K 06h	202.904	0.742	0.0273
1379	Silver	Polar metabolomics	Ag NP-NM300K 06h	378.926	0.742	0.0385
1380	Silver	Polar metabolomics	Ag NP-NM300K 06h	462.807	0.741	0.0353
1381	Silver	Polar metabolomics	Ag NP-NM300K 06h	164.93	0.74	0.0262
1382	Silver	Polar metabolomics	Ag NP-NM300K 06h	342.848	0.74	0.0223
1383	Silver	Polar metabolomics	Ag NP-NM300K 06h	372.751	0.74	0.0484
1384	Silver	Polar metabolomics	Ag NP-NM300K 06h	416.78	0.74	0.0243
1385	Silver	Polar metabolomics	Ag NP-NM300K 06h	166.934	0.738	0.0223
1386	Silver	Polar metabolomics	Ag NP-NM300K 06h	280.879	0.737	0.0416
1387	Silver	Polar metabolomics	Ag NP-NM300K 06h	148.06	0.736	0.0485	['L-Glutamic acid', 'N-Methyl-D-aspartic acid', 'N-Acetylserine', 'O-Acetylserine', 'D-Glutamic acid', 'L-4-Hydroxyglutamate semialdehyde', '3-(Carboxymethylamino)propanoic acid', 'DL-Glutamate']	C5H9NO4	HMDB00148;HMDB02393;HMDB02931;HMDB03011;HMDB03339;HMDB06556;HMDB33550;HMDB60475
1388	Silver	Polar metabolomics	Ag NP-NM300K 06h	286.893	0.735	0.0387
1389	Silver	Polar metabolomics	Ag NP-NM300K 06h	600.619	0.735	0.0461
1390	Silver	Polar metabolomics	Ag NP-NM300K 06h	359.928	0.733	0.0459
1391	Silver	Polar metabolomics	Ag NP-NM300K 06h	380.804	0.733	0.046
1392	Silver	Polar metabolomics	Ag NP-NM300K 06h	396.743	0.732	0.0187
1393	Silver	Polar metabolomics	Ag NP-NM300K 06h	445.356	0.732	0.0248
1394	Silver	Polar metabolomics	Ag NP-NM300K 06h	380.822	0.731	0.0171
1395	Silver	Polar metabolomics	Ag NP-NM300K 06h	418.777	0.73	0.0402
1396	Silver	Polar metabolomics	Ag NP-NM300K 06h	149.064	0.729	0.0372
1397	Silver	Polar metabolomics	Ag NP-NM300K 06h	420.775	0.729	0.0328
1398	Silver	Polar metabolomics	Ag NP-NM300K 06h	491.712	0.729	0.0344
1399	Silver	Polar metabolomics	Ag NP-NM300K 06h	375.035	0.728	0.022
1400	Silver	Polar metabolomics	Ag NP-NM300K 06h	178.946	0.72	0.0457
1401	Silver	Polar metabolomics	Ag NP-NM300K 06h	428.391	0.72	0.0314
1402	Silver	Polar metabolomics	Ag NP-NM300K 06h	210.935	0.714	0.023
1403	Silver	Polar metabolomics	Ag NP-NM300K 06h	200.032	0.71	0.0307	['Aminoadipic acid', 'Acetylhomoserine', 'Glutamate, gamma-methyl ester'];['O-Phosphohomoserine', 'O-Phosphothreonine', 'Iminoerythrose 4-phosphate'];['4-Acetyl-2(3H)-benzoxazolone']	C6H11NO4;C4H10NO6P;C9H7NO3	HMDB00510;HMDB29423;HMDB61715;HMDB03484;HMDB11185;HMDB60483;HMDB40612	LMFA01170098;
1404	Silver	Polar metabolomics	Ag NP-NM300K 06h	277.989	0.708	0.0318
1405	Silver	Polar metabolomics	Ag NP-NM300K 06h	404.8	0.707	0.0383
1406	Silver	Polar metabolomics	Ag NP-NM300K 06h	520.765	0.706	0.0148
1407	Silver	Polar metabolomics	Ag NP-NM300K 06h	285.051	0.694	0.00175
1408	Silver	Polar metabolomics	Ag NP-NM300K 06h	268.894	0.686	0.0135
1409	Silver	Polar metabolomics	Ag NP-NM300K 06h	204.123	0.685	0.046	['L-Acetylcarnitine']	C9H17NO4	HMDB00201
1410	Silver	Polar metabolomics	Ag NP-NM300K 06h	576.633	0.685	0.0417
1411	Silver	Polar metabolomics	Ag NP-NM300K 06h	272.968	0.683	0.045
1412	Silver	Polar metabolomics	Ag NP-NM300K 06h	270.891	0.681	0.0148
1413	Silver	Polar metabolomics	Ag NP-NM300K 06h	205.126	0.678	0.0432
1414	Silver	Polar metabolomics	Ag NP-NM300K 06h	284.868	0.672	0.036
1415	Silver	Polar metabolomics	Ag NP-NM300K 06h	315.962	0.664	0.00313
1416	Silver	Polar metabolomics	Ag NP-NM300K 06h	606.632	0.663	0.00167
1417	Silver	Polar metabolomics	Ag NP-NM300K 06h	598.642	0.659	0.0242
1418	Silver	Polar metabolomics	Ag NP-NM300K 06h	373.029	0.657	0.0485
1419	Silver	Polar metabolomics	Ag NP-NM300K 06h	259.978	0.652	0.0297
1420	Silver	Polar metabolomics	Ag NP-NM300K 06h	378.939	0.637	0.0313
1421	Silver	Polar metabolomics	Ag NP-NM300K 06h	214.006	0.616	0.0335
1422	Silver	Polar metabolomics	Ag NP-NM300K 06h	487.975	0.608	0.0201
1423	Silver	Polar metabolomics	Ag NP-NM300K 06h	256.007	0.606	0.0224
1424	Silver	Polar metabolomics	Ag NP-NM300K 06h	237.996	0.604	0.022
1425	Silver	Polar metabolomics	Ag NP-NM300K 06h	271.965	0.604	0.0313
1426	Silver	Polar metabolomics	Ag NP-NM300K 06h	260.161	0.601	0.0124	['Glutaminyl-Isoleucine', 'Glutaminyl-Leucine', 'Hydroxyprolyl-Lysine', 'Isoleucyl-Glutamine', 'Isoleucyl-Gamma-glutamate', 'Leucyl-Glutamine', 'Leucyl-Gamma-glutamate', 'Lysyl-Hydroxyproline', 'Gamma-glutamyl-Isoleucine', 'Gamma-glutamyl-Leucine']	C11H21N3O4	HMDB28800;HMDB28801;HMDB28868;HMDB28905;HMDB28921;HMDB28927;HMDB28943;HMDB28952;HMDB29152;HMDB29153
1427	Silver	Polar metabolomics	Ag NP-NM300K 06h	273.962	0.594	0.0306
1428	Silver	Polar metabolomics	Ag NP-NM300K 06h	184.058	0.592	0.0187	['Aminoadipic acid', 'Acetylhomoserine', 'Glutamate, gamma-methyl ester']	C6H11NO4	HMDB00510;HMDB29423;HMDB61715	LMFA01170098;
1429	Silver	Polar metabolomics	Ag NP-NM300K 06h	229.98	0.591	0.0354
1430	Silver	Polar metabolomics	Ag NP-NM300K 06h	249.983	0.591	0.0203
1431	Silver	Polar metabolomics	Ag NP-NM300K 06h	329.924	0.589	0.0353
1432	Silver	Polar metabolomics	Ag NP-NM300K 06h	449.883	0.588	0.0224
1433	Silver	Polar metabolomics	Ag NP-NM300K 06h	311.983	0.584	0.0164
1434	Silver	Polar metabolomics	Ag NP-NM300K 06h	493.982	0.583	0.0249
1435	Silver	Polar metabolomics	Ag NP-NM300K 06h	331.92	0.581	0.0346
1436	Silver	Polar metabolomics	Ag NP-NM300K 06h	218.072	0.58	0.0307
1437	Silver	Polar metabolomics	Ag NP-NM300K 06h	265.957	0.58	0.0353
1438	Silver	Polar metabolomics	Ag NP-NM300K 06h	170.042	0.579	0.022	['L-Glutamic acid', 'N-Methyl-D-aspartic acid', 'N-Acetylserine', 'O-Acetylserine', 'D-Glutamic acid', 'L-4-Hydroxyglutamate semialdehyde', '3-(Carboxymethylamino)propanoic acid', 'DL-Glutamate']	C5H9NO4	HMDB00148;HMDB02393;HMDB02931;HMDB03011;HMDB03339;HMDB06556;HMDB33550;HMDB60475
1439	Silver	Polar metabolomics	Ag NP-NM300K 06h	207.998	0.575	0.0353	['Taurocyamine'];['Phosphoserine', 'DL-O-Phosphoserine']	C3H9N3O3S;C3H8NO6P	HMDB03584;HMDB00272;HMDB01721
1440	Silver	Polar metabolomics	Ag NP-NM300K 06h	608.67	0.575	0.00175
1441	Silver	Polar metabolomics	Ag NP-NM300K 06h	146.165	0.574	0.0353	['Spermidine']	C7H19N3	HMDB01257
1442	Silver	Polar metabolomics	Ag NP-NM300K 06h	192.024	0.573	0.0224	['Acetaminophen', '2-Phenylglycine', 'Dopamine quinone', 'Leukoaminochrome', 'Methyl 2-aminobenzoate', '2-(Methylamino)benzoic acid', '3alpha,4,7,7alpha-Tetrahydro-1H-isoindole-1,3(2H)-dione', 'Ethyl nicotinate', '2-Amino-3-methylbenzoate', ""2'-Hydroxyacetanilide""]	C8H9NO2	HMDB01859;HMDB02210;HMDB12219;HMDB12992;HMDB29703;HMDB32609;HMDB33903;HMDB59846;HMDB60680;HMDB61919
1443	Silver	Polar metabolomics	Ag NP-NM300K 06h	186.016	0.568	0.0238	['L-Glutamic acid', 'N-Methyl-D-aspartic acid', 'N-Acetylserine', 'O-Acetylserine', 'D-Glutamic acid', 'L-4-Hydroxyglutamate semialdehyde', '3-(Carboxymethylamino)propanoic acid', 'DL-Glutamate'];['Phosphoserine', 'DL-O-Phosphoserine']	C5H9NO4;C3H8NO6P	HMDB00148;HMDB02393;HMDB02931;HMDB03011;HMDB03339;HMDB06556;HMDB33550;HMDB60475;HMDB00272;HMDB01721
1444	Silver	Polar metabolomics	Ag NP-NM300K 06h	287.939	0.566	0.0307
1445	Silver	Polar metabolomics	Ag NP-NM300K 06h	333.965	0.565	0.0187
1446	Silver	Polar metabolomics	Ag NP-NM300K 06h	290.001	0.564	0.0127
1447	Silver	Polar metabolomics	Ag NP-NM300K 06h	453.924	0.555	0.0127
1448	Silver	Polar metabolomics	Ag NP-NM300K 06h	156.964	0.554	0.00289
1449	Silver	Polar metabolomics	Ag NP-NM300K 06h	132.987	0.553	0.0148
1450	Silver	Polar metabolomics	Ag NP-NM300K 06h	171.046	0.553	0.0171
1451	Silver	Polar metabolomics	Ag NP-NM300K 06h	129.139	0.552	0.0368
1452	Silver	Polar metabolomics	Ag NP-NM300K 06h	147.169	0.531	0.0307
1453	Silver	Polar metabolomics	Ag NP-NM300K 06h	193.028	0.511	0.022
1454	Silver	Polar metabolomics	Ag NP-NM300K 06h	273.051	0.47	0.0141	['Gamma-Glutamylcysteine']	C8H14N2O5S	HMDB01049
1455	Silver	Polar metabolomics	Ag NP-NM300K 06h	217.068	0.454	0.0238	['D-4-O-Methyl-myo-inositol', '4-O-Methyl-myo-inositol', 'Methyl beta-D-glucopyranoside', '(-)-Bornesitol', 'Sequoyitol', 'Mytilitol', 'D-Pinitol', 'L-Quebrachitol', 'L-Pinitol']	C7H14O6	HMDB29915;HMDB29916;HMDB29965;HMDB31437;HMDB31449;HMDB33816;HMDB34219;HMDB34221;HMDB34222
1456	Silver	Polar metabolomics	Ag NP-NM300K 06h	157.011	0.433	0.0346	['L-Malic acid', 'Malic acid', 'D-Malic acid', 'Velcorin']	C4H6O5	HMDB00156;HMDB00744;HMDB31518;HMDB32872
1457	Silver	Polar metabolomics	Ag NP-NM300K 06h	178.993	0.428	0.0344	['2-Methoxybenzenethiol', 'Kahweofuran', '2-Acetyl-5-methylthiophene', '2-Propanoylthiophene', '2-(Methylthio)phenol', '2-Acetyl-3-methylthiophene'];['4-Hydroxybenzoic acid', 'Salicylic acid', '3-Hydroxybenzoic acid', 'Gentisate aldehyde', '2-Methoxy-1,4-benzoquinone', 'alpha-Furyl methyl diketone', 'Sesamol', '3,4-Dihydroxybenzaldehyde']	C7H8OS;C7H6O3	HMDB32571;HMDB32922;HMDB33130;HMDB33159;HMDB41281;HMDB41502;HMDB00500;HMDB01895;HMDB02466;HMDB04062;HMDB32576;HMDB32920;HMDB33812;HMDB59965
1458	Silver	Polar metabolomics	Ag NP-NM300K 06h	271.036	0.406	0.046
1459	Silver	Polar metabolomics	Ag NP-NM300K 06h	310.057	0.403	0.0148
1460	Silver	Polar metabolomics	Ag NP-NM300K 06h	164.117	0.36	0.022
1461	Silver	Polar metabolomics	Ag NP-NM300K 06h	184.094	0.303	0.00188	['L-Carnitine']	C7H15NO3	HMDB00062
1462	Silver	Polar metabolomics	Ag NP-NM300K 06h	163.116	0.292	0.00839
1463	Silver	Polar metabolomics	Ag NP-NM300K 06h	162.113	0.289	0.00365	['L-Carnitine']	C7H15NO3	HMDB00062
1464	Silver	Polar metabolomics	Ag NP-NM300K 24h	122.027	5.932	0.0018	['L-Cysteine', 'D-Cysteine']	C3H7NO2S	HMDB00574;HMDB03417
1465	Silver	Polar metabolomics	Ag NP-NM300K 24h	289.006	4.582	0.000704
1466	Silver	Polar metabolomics	Ag NP-NM300K 24h	256.98	3.005	0.00468
1467	Silver	Polar metabolomics	Ag NP-NM300K 24h	530.275	2.992	0.0484
1468	Silver	Polar metabolomics	Ag NP-NM300K 24h	463.383	2.953	0.0257
1469	Silver	Polar metabolomics	Ag NP-NM300K 24h	294.002	2.616	0.00979
1470	Silver	Polar metabolomics	Ag NP-NM300K 24h	177.962	2.591	0.00312
1471	Silver	Polar metabolomics	Ag NP-NM300K 24h	490.41	2.534	0.0139
1472	Silver	Polar metabolomics	Ag NP-NM300K 24h	293.879	2.532	0.00197
1473	Silver	Polar metabolomics	Ag NP-NM300K 24h	274.99	2.489	0.00635	['Cyclobrassinin']	C11H10N2S2	HMDB33352
1474	Silver	Polar metabolomics	Ag NP-NM300K 24h	484.361	2.477	0.0116
1475	Silver	Polar metabolomics	Ag NP-NM300K 24h	491.413	2.465	0.0163
1476	Silver	Polar metabolomics	Ag NP-NM300K 24h	237.918	2.376	0.00295
1477	Silver	Polar metabolomics	Ag NP-NM300K 24h	295.876	2.366	0.00197
1478	Silver	Polar metabolomics	Ag NP-NM300K 24h	152.054	2.287	0.0191
1479	Silver	Polar metabolomics	Ag NP-NM300K 24h	239.962	2.287	0.00503
1480	Silver	Polar metabolomics	Ag NP-NM300K 24h	105.11	2.228	0.00269
1481	Silver	Polar metabolomics	Ag NP-NM300K 24h	120.003	2.189	0.00984
1482	Silver	Polar metabolomics	Ag NP-NM300K 24h	104.107	2.164	0.00236	['Neurine']	C5H13NO	HMDB31259
1483	Silver	Polar metabolomics	Ag NP-NM300K 24h	325.887	2.125	0.000601
1484	Silver	Polar metabolomics	Ag NP-NM300K 24h	265.931	2.11	0.00199
1485	Silver	Polar metabolomics	Ag NP-NM300K 24h	245.949	2.1	0.00316
1486	Silver	Polar metabolomics	Ag NP-NM300K 24h	292.942	2.093	0.00425
1487	Silver	Polar metabolomics	Ag NP-NM300K 24h	178.028	2.088	0.0115
1488	Silver	Polar metabolomics	Ag NP-NM300K 24h	466.818	2.081	0.0018
1489	Silver	Polar metabolomics	Ag NP-NM300K 24h	267.928	2.067	0.00225
1490	Silver	Polar metabolomics	Ag NP-NM300K 24h	269.972	2.063	0.00295
1491	Silver	Polar metabolomics	Ag NP-NM300K 24h	297.921	2.063	0.00157
1492	Silver	Polar metabolomics	Ag NP-NM300K 24h	150.014	2.048	0.00273	['4-Aminophenol', '2-Acetylpyrrole', '1-Methyl-2-pyrrolecarboxaldehyde']	C6H7NO	HMDB01169;HMDB35882;HMDB40582
1493	Silver	Polar metabolomics	Ag NP-NM300K 24h	350.901	2.039	0.0025
1494	Silver	Polar metabolomics	Ag NP-NM300K 24h	518.322	2.009	0.0364	['LysoPC(16:0)']	C24H50NO7P	HMDB10382	LMGP01050018
1495	Silver	Polar metabolomics	Ag NP-NM300K 24h	104.053	1.99	0.0484
1496	Silver	Polar metabolomics	Ag NP-NM300K 24h	519.325	1.979	0.0179
1497	Silver	Polar metabolomics	Ag NP-NM300K 24h	133.069	1.978	0.0328
1498	Silver	Polar metabolomics	Ag NP-NM300K 24h	251.894	1.976	0.00492
1499	Silver	Polar metabolomics	Ag NP-NM300K 24h	133.032	1.969	0.0203	['3-Methyl sulfolene']	C5H8O2S	HMDB59667
1500	Silver	Polar metabolomics	Ag NP-NM300K 24h	133.061	1.96	0.0182	['Ureidopropionic acid', 'L-Asparagine', 'Glycyl-glycine', 'N-Carbamoylsarcosine', 'D-Asparagine']	C4H8N2O3	HMDB00026;HMDB00168;HMDB11733;HMDB12265;HMDB33780
1501	Silver	Polar metabolomics	Ag NP-NM300K 24h	234.983	1.943	0.00417
1502	Silver	Polar metabolomics	Ag NP-NM300K 24h	150.058	1.935	0.0163	['L-Methionine', 'Penicillamine', 'Racemethionine']	C5H11NO2S	HMDB00696;HMDB14997;HMDB33951
1503	Silver	Polar metabolomics	Ag NP-NM300K 24h	318.965	1.925	0.00316
1504	Silver	Polar metabolomics	Ag NP-NM300K 24h	205.097	1.919	0.00892	['L-Tryptophan', 'D-Tryptophan', '3-Hydroxymethylantipyrine', 'Ethotoin', 'Nirvanol', '4-Hydroxyantipyrine', 'S-nirvanol']	C11H12N2O2	HMDB00929;HMDB13609;HMDB13840;HMDB14892;HMDB60533;HMDB60878;HMDB60967
1505	Silver	Polar metabolomics	Ag NP-NM300K 24h	188.07	1.91	0.0139	['Indoleacrylic acid']	C11H9NO2	HMDB00734
1506	Silver	Polar metabolomics	Ag NP-NM300K 24h	151.062	1.905	0.0293	['7-Methylhypoxanthine', '1-Methylhypoxanthine ']	C6H6N4O	HMDB03162;HMDB13141
1507	Silver	Polar metabolomics	Ag NP-NM300K 24h	236.98	1.902	0.00514
1508	Silver	Polar metabolomics	Ag NP-NM300K 24h	370.977	1.887	0.00987
1509	Silver	Polar metabolomics	Ag NP-NM300K 24h	164.03	1.881	0.0076	['p-Anisidine', '2-Propionylpyrrole', '4-Hydroxybenzylamine', '1-Ethyl-1H-pyrrole-2-carboxaldehyde', '2-Acetyl-1-methylpyrrole']	C7H9NO	HMDB29300;HMDB32492;HMDB32578;HMDB36058;HMDB40360
1510	Silver	Polar metabolomics	Ag NP-NM300K 24h	165.988	1.877	0.0139
1511	Silver	Polar metabolomics	Ag NP-NM300K 24h	177.025	1.875	0.0093	['N-Methylnicotinamide', '2-Acetyl-3-methylpyrazine', '2-Aminobenzamide', '4-Acetyl-2-methylpyrimidine', '2-Methylnicotinamide']	C7H8N2O	HMDB03152;HMDB30001;HMDB33947;HMDB37819;HMDB59711
1512	Silver	Polar metabolomics	Ag NP-NM300K 24h	283.988	1.873	0.00578
1513	Silver	Polar metabolomics	Ag NP-NM300K 24h	327.931	1.857	0.00291
1514	Silver	Polar metabolomics	Ag NP-NM300K 24h	156.046	1.856	0.0082
1515	Silver	Polar metabolomics	Ag NP-NM300K 24h	296.983	1.841	0.00992
1516	Silver	Polar metabolomics	Ag NP-NM300K 24h	180.003	1.839	0.0232
1517	Silver	Polar metabolomics	Ag NP-NM300K 24h	191.077	1.837	0.00236
1518	Silver	Polar metabolomics	Ag NP-NM300K 24h	223.985	1.828	0.00503
1519	Silver	Polar metabolomics	Ag NP-NM300K 24h	279.946	1.827	0.00197
1520	Silver	Polar metabolomics	Ag NP-NM300K 24h	323.89	1.824	0.00157
1521	Silver	Polar metabolomics	Ag NP-NM300K 24h	128.032	1.818	0.00368	['L-Serine', 'D-Serine']	C3H7NO3	HMDB00187;HMDB03406
1522	Silver	Polar metabolomics	Ag NP-NM300K 24h	219.083	1.818	0.0101
1523	Silver	Polar metabolomics	Ag NP-NM300K 24h	327.964	1.817	0.0152
1524	Silver	Polar metabolomics	Ag NP-NM300K 24h	134.064	1.814	0.023
1525	Silver	Polar metabolomics	Ag NP-NM300K 24h	317.06	1.812	0.004
1526	Silver	Polar metabolomics	Ag NP-NM300K 24h	332.949	1.811	0.00197
1527	Silver	Polar metabolomics	Ag NP-NM300K 24h	155.043	1.802	0.0076	['Ureidopropionic acid', 'L-Asparagine', 'Glycyl-glycine', 'N-Carbamoylsarcosine', 'D-Asparagine']	C4H8N2O3	HMDB00026;HMDB00168;HMDB11733;HMDB12265;HMDB33780
1528	Silver	Polar metabolomics	Ag NP-NM300K 24h	308.916	1.788	0.0139
1529	Silver	Polar metabolomics	Ag NP-NM300K 24h	121.084	1.784	0.0232
1530	Silver	Polar metabolomics	Ag NP-NM300K 24h	366.874	1.767	0.00777
1531	Silver	Polar metabolomics	Ag NP-NM300K 24h	250.957	1.764	0.0076
1532	Silver	Polar metabolomics	Ag NP-NM300K 24h	167.09	1.761	0.0181
1533	Silver	Polar metabolomics	Ag NP-NM300K 24h	370.916	1.759	0.0317
1534	Silver	Polar metabolomics	Ag NP-NM300K 24h	301.975	1.753	0.0143
1535	Silver	Polar metabolomics	Ag NP-NM300K 24h	202.047	1.752	0.0076	['Bicine', '2-Amino-4-ethoxy-3-hydroxybutanoic acid', '1-Deoxynojirimycin'];['Hippuric acid', '3-Succinoylpyridine', 'Adrenochrome', 'Methyl n-formylanthranilate', '1-(4-Methoxyphenyl)-2-nitroethylene']	C6H13NO4;C9H9NO3	HMDB11727;HMDB32862;HMDB35359;HMDB00714;HMDB00992;HMDB12884;HMDB32398;HMDB32595
1536	Silver	Polar metabolomics	Ag NP-NM300K 24h	176.122	1.749	0.004
1537	Silver	Polar metabolomics	Ag NP-NM300K 24h	531.288	1.747	0.0119
1538	Silver	Polar metabolomics	Ag NP-NM300K 24h	98.0212	1.746	0.00726	['Glycine', 'Acetohydroxamic Acid', 'Ethyl nitrite']	C2H5NO2	HMDB00123;HMDB14691;HMDB31239
1539	Silver	Polar metabolomics	Ag NP-NM300K 24h	166.086	1.741	0.0273	['L-Phenylalanine', '3-Pyridinebutanoic acid', 'Benzocaine', 'Norsalsolinol', 'Gentiatibetine', 'Ethyl 2-aminobenzoate', 'Methyl N-methylanthranilate', 'Benzyl glycinate']	C9H11NO2	HMDB00159;HMDB01007;HMDB04992;HMDB06044;HMDB33485;HMDB33589;HMDB34169;HMDB59934
1540	Silver	Polar metabolomics	Ag NP-NM300K 24h	227.079	1.74	0.0252	['N6-Acetyl-L-lysine', 'N-Alpha-acetyllysine', 'Glycyl-L-leucine', 'Alanyl-Valine', 'Glycyl-Isoleucine', 'Isoleucyl-Glycine', 'Leucyl-Glycine', 'Valyl-Alanine'];['L-Tryptophan', 'D-Tryptophan', '3-Hydroxymethylantipyrine', 'Ethotoin', 'Nirvanol', '4-Hydroxyantipyrine', 'S-nirvanol']	C8H16N2O3;C11H12N2O2	HMDB00206;HMDB00446;HMDB00759;HMDB28700;HMDB28844;HMDB28907;HMDB28929;HMDB29120;HMDB00929;HMDB13609;HMDB13840;HMDB14892;HMDB60533;HMDB60878;HMDB60967
1541	Silver	Polar metabolomics	Ag NP-NM300K 24h	269.965	1.74	0.00726
1542	Silver	Polar metabolomics	Ag NP-NM300K 24h	243.053	1.732	0.0225	['L-Tryptophan', 'D-Tryptophan', '3-Hydroxymethylantipyrine', 'Ethotoin', 'Nirvanol', '4-Hydroxyantipyrine', 'S-nirvanol']	C11H12N2O2	HMDB00929;HMDB13609;HMDB13840;HMDB14892;HMDB60533;HMDB60878;HMDB60967
1543	Silver	Polar metabolomics	Ag NP-NM300K 24h	171.017	1.73	0.023	['Ureidopropionic acid', 'L-Asparagine', 'Glycyl-glycine', 'N-Carbamoylsarcosine', 'D-Asparagine']	C4H8N2O3	HMDB00026;HMDB00168;HMDB11733;HMDB12265;HMDB33780
1544	Silver	Polar metabolomics	Ag NP-NM300K 24h	138.074	1.729	0.0472
1545	Silver	Polar metabolomics	Ag NP-NM300K 24h	281.943	1.728	0.00417
1546	Silver	Polar metabolomics	Ag NP-NM300K 24h	268.009	1.724	0.023
1547	Silver	Polar metabolomics	Ag NP-NM300K 24h	137.071	1.718	0.038	['N-Methylnicotinamide', '2-Acetyl-3-methylpyrazine', '2-Aminobenzamide', '4-Acetyl-2-methylpyrimidine', '2-Methylnicotinamide']	C7H8N2O	HMDB03152;HMDB30001;HMDB33947;HMDB37819;HMDB59711
1548	Silver	Polar metabolomics	Ag NP-NM300K 24h	142.048	1.713	0.02	['L-Threonine', 'L-Homoserine', 'L-Allothreonine', 'Hydroxyethyl glycine', '4-Amino-3-hydroxybutyrate']	C4H9NO3	HMDB00167;HMDB00719;HMDB04041;HMDB61148;HMDB61877
1549	Silver	Polar metabolomics	Ag NP-NM300K 24h	175.119	1.709	0.004	['L-Arginine', 'D-Arginine']	C6H14N4O2	HMDB00517;HMDB03416
1550	Silver	Polar metabolomics	Ag NP-NM300K 24h	289.975	1.701	0.0039
1551	Silver	Polar metabolomics	Ag NP-NM300K 24h	277.967	1.7	0.0218
1552	Silver	Polar metabolomics	Ag NP-NM300K 24h	192.999	1.696	0.023
1553	Silver	Polar metabolomics	Ag NP-NM300K 24h	245.012	1.679	0.0186
1554	Silver	Polar metabolomics	Ag NP-NM300K 24h	87.0997	1.677	0.0116
1555	Silver	Polar metabolomics	Ag NP-NM300K 24h	236.021	1.676	0.0259
1556	Silver	Polar metabolomics	Ag NP-NM300K 24h	220.086	1.664	0.00117
1557	Silver	Polar metabolomics	Ag NP-NM300K 24h	197.101	1.65	0.00706	['L-Arginine', 'D-Arginine']	C6H14N4O2	HMDB00517;HMDB03416
1558	Silver	Polar metabolomics	Ag NP-NM300K 24h	156.077	1.643	0.0224	['L-Histidine', 'L-2-Amino-3-(1-pyrazolyl)propanoic acid']	C6H9N3O2	HMDB00177;HMDB34267
1559	Silver	Polar metabolomics	Ag NP-NM300K 24h	284.003	1.64	0.023
1560	Silver	Polar metabolomics	Ag NP-NM300K 24h	133.105	1.626	0.0116
1561	Silver	Polar metabolomics	Ag NP-NM300K 24h	307.02	1.621	0.0135
1562	Silver	Polar metabolomics	Ag NP-NM300K 24h	198.104	1.613	0.0103
1563	Silver	Polar metabolomics	Ag NP-NM300K 24h	133.099	1.61	0.0215	['1,3-Octadiene', '2-(Methylenebutyl)-cyclopropane', '2,4-Octadiene', 'Dimethylhexa-1,4-diene', '2,5-Dimethyl-2,4-hexadiene']	C8H14	HMDB40966;HMDB61899;HMDB61900;HMDB61901;HMDB61902
1564	Silver	Polar metabolomics	Ag NP-NM300K 24h	226.045	1.605	0.0228	['4-Hydroxydiphenylamine', '2-(1-Naphthyl)acetamide']	C12H11NO	HMDB32597;HMDB32710
1565	Silver	Polar metabolomics	Ag NP-NM300K 24h	291.983	1.592	0.0195
1566	Silver	Polar metabolomics	Ag NP-NM300K 24h	528.072	1.589	0.023
1567	Silver	Polar metabolomics	Ag NP-NM300K 24h	132.102	1.586	0.0194	['L-Isoleucine', 'L-Alloisoleucine', 'L-Leucine', 'L-Norleucine', 'Aminocaproic acid', 'Beta-Leucine', 'D-Leucine', '3-Aminocaproic acid', '6-Deoxyfagomine', 'N-(2-Hydroxyethyl)-morpholine', 'N-methylvaline']	C6H13NO2	HMDB00172;HMDB00557;HMDB00687;HMDB01645;HMDB01901;HMDB03640;HMDB13773;HMDB29168;HMDB36382;HMDB60650;HMDB61716	LMFA01100047;LMFA01100042;LMFA01100035;
1568	Silver	Polar metabolomics	Ag NP-NM300K 24h	281.905	1.585	0.00726
1569	Silver	Polar metabolomics	Ag NP-NM300K 24h	178.059	1.582	0.0267	['L-Histidine', 'L-2-Amino-3-(1-pyrazolyl)propanoic acid']	C6H9N3O2	HMDB00177;HMDB34267
1570	Silver	Polar metabolomics	Ag NP-NM300K 24h	469.797	1.578	0.0221
1571	Silver	Polar metabolomics	Ag NP-NM300K 24h	119.09	1.574	0.0218
1572	Silver	Polar metabolomics	Ag NP-NM300K 24h	221.988	1.572	0.00269
1573	Silver	Polar metabolomics	Ag NP-NM300K 24h	293.98	1.572	0.0358
1574	Silver	Polar metabolomics	Ag NP-NM300K 24h	353.947	1.572	0.0297
1575	Silver	Polar metabolomics	Ag NP-NM300K 24h	73.0842	1.564	0.0179
1576	Silver	Polar metabolomics	Ag NP-NM300K 24h	270.001	1.561	0.019
1577	Silver	Polar metabolomics	Ag NP-NM300K 24h	285.946	1.549	0.00976
1578	Silver	Polar metabolomics	Ag NP-NM300K 24h	274.006	1.538	0.0409
1579	Silver	Polar metabolomics	Ag NP-NM300K 24h	134.106	1.537	0.0195
1580	Silver	Polar metabolomics	Ag NP-NM300K 24h	179.09	1.535	0.0201
1581	Silver	Polar metabolomics	Ag NP-NM300K 24h	200.041	1.535	0.0288
1582	Silver	Polar metabolomics	Ag NP-NM300K 24h	279.964	1.53	0.044
1583	Silver	Polar metabolomics	Ag NP-NM300K 24h	86.0964	1.528	0.0243	['Piperidine']	C5H11N	HMDB34301
1584	Silver	Polar metabolomics	Ag NP-NM300K 24h	263.027	1.516	0.0174
1585	Silver	Polar metabolomics	Ag NP-NM300K 24h	320.985	1.505	0.0179
1586	Silver	Polar metabolomics	Ag NP-NM300K 24h	271.998	1.484	0.0183
1587	Silver	Polar metabolomics	Ag NP-NM300K 24h	183.085	1.482	0.0325
1588	Silver	Polar metabolomics	Ag NP-NM300K 24h	205.068	1.474	0.0188	['Galactitol', 'Sorbitol', 'Mannitol', 'L-Iditol']	C6H14O6	HMDB00107;HMDB00247;HMDB00765;HMDB11632
1589	Silver	Polar metabolomics	Ag NP-NM300K 24h	105.074	1.469	0.0237
1590	Silver	Polar metabolomics	Ag NP-NM300K 24h	255.059	1.443	0.0419
1591	Silver	Polar metabolomics	Ag NP-NM300K 24h	295.977	1.443	0.0293
1592	Silver	Polar metabolomics	Ag NP-NM300K 24h	448.929	1.407	0.0317
1593	Silver	Polar metabolomics	Ag NP-NM300K 24h	423.269	1.387	0.0177
1594	Silver	Polar metabolomics	Ag NP-NM300K 24h	279.001	1.38	0.0383
1595	Silver	Polar metabolomics	Ag NP-NM300K 24h	574.859	1.316	0.0489
1596	Silver	Polar metabolomics	Ag NP-NM300K 24h	298.097	1.279	0.0215	[""5'-Methylthioadenosine""]	C11H15N5O3S	HMDB01173
1597	Silver	Polar metabolomics	Ag NP-NM300K 24h	228.063	1.256	0.0209	['N-Methylcalystegine B2'];['Indolelactic acid', '5-Methoxyindoleacetate', 'Cinnamoylglycine', 'Edulitine', 'Methyl 1-methoxy-1H-indole-3-carboxylate', '3-Indolehydracrylic acid']	C8H15NO4;C11H11NO3	HMDB36604;HMDB00671;HMDB04096;HMDB11621;HMDB30179;HMDB32755;HMDB59765
1598	Silver	Polar metabolomics	Ag NP-NM300K 24h	456.946	1.201	0.0128
1599	Silver	Polar metabolomics	Ag NP-NM300K 24h	458.943	1.192	0.0349
1600	Silver	Polar metabolomics	Ag NP-NM300K 24h	494.919	1.186	0.0472
1601	Silver	Polar metabolomics	Ag NP-NM300K 24h	436.961	1.166	0.047
1602	Silver	Polar metabolomics	Ag NP-NM300K 24h	535.709	1.166	0.0358
1603	Silver	Polar metabolomics	Ag NP-NM300K 24h	215.141	1.154	0.019	['2,6-Diisopropyl-3-methylphenol', '2,5-Diisopropyl-4-methylphenol', '2,5-Diisopropyl-3-methylphenol', '2,4-Diisopropyl-5-methylphenol', '2,4-Diisopropyl-3-methylphenol', '2,3-Diisopropyl-5-methylphenol', '4-(4-Methyl-3-pentenyl)-3-cyclohexene-1-carboxaldehyde', 'Pseudoionone', '4-(2,6,6-Trimethylcyclohex-1-enyl)but-2-en-4-one', '(2E,4Z,7Z)-2,4,7-Tridecatrienal', '(E)-5,8-Megastigmadien-4-one', '…	C13H20O	HMDB29820;HMDB29821;HMDB29822;HMDB29823;HMDB29824;HMDB29825;HMDB31733;HMDB32498;HMDB32541;HMDB33545;HMDB34671;HMDB34959;HMDB34979;HMDB35682;HMDB35753;HMDB36022;HMDB36027;HMDB36144;HMDB36565;HMDB36684;HMDB36818;HMDB37139;HMDB41615;HMDB59883
1604	Silver	Polar metabolomics	Ag NP-NM300K 24h	401.82	1.15	0.0277
1605	Silver	Polar metabolomics	Ag NP-NM300K 24h	296.936	1.148	0.0148
1606	Silver	Polar metabolomics	Ag NP-NM300K 24h	345.859	1.139	0.0232
1607	Silver	Polar metabolomics	Ag NP-NM300K 24h	487.8	1.135	0.023
1608	Silver	Polar metabolomics	Ag NP-NM300K 24h	400.984	1.132	0.0378
1609	Silver	Polar metabolomics	Ag NP-NM300K 24h	343.862	1.131	0.0336
1610	Silver	Polar metabolomics	Ag NP-NM300K 24h	285.903	1.13	0.019
1611	Silver	Polar metabolomics	Ag NP-NM300K 24h	398.987	1.127	0.0233
1612	Silver	Polar metabolomics	Ag NP-NM300K 24h	258.191	1.123	0.044
1613	Silver	Polar metabolomics	Ag NP-NM300K 24h	287.9	1.123	0.0284
1614	Silver	Polar metabolomics	Ag NP-NM300K 24h	457.95	1.113	0.0283
1615	Silver	Polar metabolomics	Ag NP-NM300K 24h	462.985	1.112	0.047
1616	Silver	Polar metabolomics	Ag NP-NM300K 24h	289.897	1.082	0.0356
1617	Silver	Polar metabolomics	Ag NP-NM300K 24h	263.008	0.868	0.0472
1618	Silver	Polar metabolomics	Ag NP-NM300K 24h	290.951	0.82	0.0421
1619	Silver	Polar metabolomics	Ag NP-NM300K 24h	242.063	0.816	0.00979
1620	Silver	Polar metabolomics	Ag NP-NM300K 24h	280.962	0.811	0.0374
1621	Silver	Polar metabolomics	Ag NP-NM300K 24h	378.926	0.804	0.023
1622	Silver	Polar metabolomics	Ag NP-NM300K 24h	493.996	0.793	0.0344
1623	Silver	Polar metabolomics	Ag NP-NM300K 24h	375.041	0.791	0.0458
1624	Silver	Polar metabolomics	Ag NP-NM300K 24h	471.898	0.79	0.0344
1625	Silver	Polar metabolomics	Ag NP-NM300K 24h	493.948	0.789	0.0421
1626	Silver	Polar metabolomics	Ag NP-NM300K 24h	241.029	0.788	0.00431
1627	Silver	Polar metabolomics	Ag NP-NM300K 24h	324.037	0.788	0.0293
1628	Silver	Polar metabolomics	Ag NP-NM300K 24h	294.993	0.784	0.0362
1629	Silver	Polar metabolomics	Ag NP-NM300K 24h	272.043	0.783	0.0161
1630	Silver	Polar metabolomics	Ag NP-NM300K 24h	499.843	0.78	0.0174
1631	Silver	Polar metabolomics	Ag NP-NM300K 24h	527.858	0.777	0.0076
1632	Silver	Polar metabolomics	Ag NP-NM300K 24h	411.941	0.754	0.0143
1633	Silver	Polar metabolomics	Ag NP-NM300K 24h	505.797	0.75	0.042
1634	Silver	Polar metabolomics	Ag NP-NM300K 24h	274.965	0.749	0.0389
1635	Silver	Polar metabolomics	Ag NP-NM300K 24h	333.072	0.749	0.0451
1636	Silver	Polar metabolomics	Ag NP-NM300K 24h	469.901	0.745	0.0289
1637	Silver	Polar metabolomics	Ag NP-NM300K 24h	469.02	0.742	0.044
1638	Silver	Polar metabolomics	Ag NP-NM300K 24h	232.993	0.74	0.0289
1639	Silver	Polar metabolomics	Ag NP-NM300K 24h	327.08	0.733	0.0472	['N-Acetylaspartylglutamic acid']	C11H16N2O8	HMDB01067
1640	Silver	Polar metabolomics	Ag NP-NM300K 24h	525.952	0.733	0.0146
1641	Silver	Polar metabolomics	Ag NP-NM300K 24h	274.089	0.732	0.00273	['Modafinil'];['Muramic acid', 'N-(1-Deoxy-1-fructosyl)alanine']	C15H15NO2S;C9H17NO7	HMDB14883;HMDB03254;HMDB38662
1642	Silver	Polar metabolomics	Ag NP-NM300K 24h	264.082	0.731	0.0289
1643	Silver	Polar metabolomics	Ag NP-NM300K 24h	242.1	0.726	0.0367	['Pantothenic acid']	C9H17NO5	HMDB00210
1644	Silver	Polar metabolomics	Ag NP-NM300K 24h	466.136	0.725	0.0198
1645	Silver	Polar metabolomics	Ag NP-NM300K 24h	521.824	0.717	0.000434
1646	Silver	Polar metabolomics	Ag NP-NM300K 24h	271.04	0.715	0.0107
1647	Silver	Polar metabolomics	Ag NP-NM300K 24h	582.604	0.714	0.0329
1648	Silver	Polar metabolomics	Ag NP-NM300K 24h	226.922	0.706	0.0328
1649	Silver	Polar metabolomics	Ag NP-NM300K 24h	413.939	0.702	0.0209
1650	Silver	Polar metabolomics	Ag NP-NM300K 24h	175.034	0.693	0.0177	['(4-Methylphenyl)acetaldehyde', 'Cinnamyl alcohol', 'trans-Cinnamyl alcohol', '(Z)-4-(1-Propenyl)phenol', '2-Phenylpropanal', '4-Ethylbenzaldehyde', '2,4-Dimethylbenzaldehyde', ""4'-Methylacetophenone"", '1-Phenyl-1-propanone', '3-Phenylpropanal', 'Chavicol', '7-Nonene-3,5-diyn-1-ol', 'o-Vinylanisole', 'Indan-1-ol', 'm-Methylacetophenone']	C9H10O	HMDB29639;HMDB29697;HMDB29698;HMDB30839;HMDB31626;HMDB32024;HMDB32142;HMDB32608;HMDB32623;HMDB33716;HMDB34107;HMDB34563;HMDB36441;HMDB59601;HMDB59895
1651	Silver	Polar metabolomics	Ag NP-NM300K 24h	427.916	0.692	0.0342
1652	Silver	Polar metabolomics	Ag NP-NM300K 24h	260.03	0.691	0.0103
1653	Silver	Polar metabolomics	Ag NP-NM300K 24h	322.04	0.687	0.0104
1654	Silver	Polar metabolomics	Ag NP-NM300K 24h	214.006	0.685	0.00595
1655	Silver	Polar metabolomics	Ag NP-NM300K 24h	381.927	0.685	0.00616
1656	Silver	Polar metabolomics	Ag NP-NM300K 24h	272.968	0.684	0.00404
1657	Silver	Polar metabolomics	Ag NP-NM300K 24h	449.883	0.684	0.00225
1658	Silver	Polar metabolomics	Ag NP-NM300K 24h	517.83	0.683	0.000704
1659	Silver	Polar metabolomics	Ag NP-NM300K 24h	200.032	0.679	0.0115	['Aminoadipic acid', 'Acetylhomoserine', 'Glutamate, gamma-methyl ester'];['O-Phosphohomoserine', 'O-Phosphothreonine', 'Iminoerythrose 4-phosphate'];['4-Acetyl-2(3H)-benzoxazolone']	C6H11NO4;C4H10NO6P;C9H7NO3	HMDB00510;HMDB29423;HMDB61715;HMDB03484;HMDB11185;HMDB60483;HMDB40612	LMFA01170098;
1660	Silver	Polar metabolomics	Ag NP-NM300K 24h	273.962	0.679	0.00197
1661	Silver	Polar metabolomics	Ag NP-NM300K 24h	521.77	0.678	0.00225
1662	Silver	Polar metabolomics	Ag NP-NM300K 24h	156.964	0.677	0.0226
1663	Silver	Polar metabolomics	Ag NP-NM300K 24h	271.965	0.674	0.00197
1664	Silver	Polar metabolomics	Ag NP-NM300K 24h	329.924	0.671	0.000434
1665	Silver	Polar metabolomics	Ag NP-NM300K 24h	331.92	0.671	0.000871
1666	Silver	Polar metabolomics	Ag NP-NM300K 24h	455.907	0.67	0.0127
1667	Silver	Polar metabolomics	Ag NP-NM300K 24h	260.161	0.666	0.0116	['Glutaminyl-Isoleucine', 'Glutaminyl-Leucine', 'Hydroxyprolyl-Lysine', 'Isoleucyl-Glutamine', 'Isoleucyl-Gamma-glutamate', 'Leucyl-Glutamine', 'Leucyl-Gamma-glutamate', 'Lysyl-Hydroxyproline', 'Gamma-glutamyl-Isoleucine', 'Gamma-glutamyl-Leucine']	C11H21N3O4	HMDB28800;HMDB28801;HMDB28868;HMDB28905;HMDB28921;HMDB28927;HMDB28943;HMDB28952;HMDB29152;HMDB29153
1668	Silver	Polar metabolomics	Ag NP-NM300K 24h	429.934	0.664	0.00497
1669	Silver	Polar metabolomics	Ag NP-NM300K 24h	249.983	0.662	0.00362
1670	Silver	Polar metabolomics	Ag NP-NM300K 24h	329.939	0.66	0.00514
1671	Silver	Polar metabolomics	Ag NP-NM300K 24h	401.913	0.66	0.00273
1672	Silver	Polar metabolomics	Ag NP-NM300K 24h	333.965	0.659	0.00295
1673	Silver	Polar metabolomics	Ag NP-NM300K 24h	259.946	0.658	0.043
1674	Silver	Polar metabolomics	Ag NP-NM300K 24h	310.057	0.655	0.0117
1675	Silver	Polar metabolomics	Ag NP-NM300K 24h	192.024	0.648	0.015	['Acetaminophen', '2-Phenylglycine', 'Dopamine quinone', 'Leukoaminochrome', 'Methyl 2-aminobenzoate', '2-(Methylamino)benzoic acid', '3alpha,4,7,7alpha-Tetrahydro-1H-isoindole-1,3(2H)-dione', 'Ethyl nicotinate', '2-Amino-3-methylbenzoate', ""2'-Hydroxyacetanilide""]	C8H9NO2	HMDB01859;HMDB02210;HMDB12219;HMDB12992;HMDB29703;HMDB32609;HMDB33903;HMDB59846;HMDB60680;HMDB61919
1676	Silver	Polar metabolomics	Ag NP-NM300K 24h	183.026	0.647	0.0158	['Oxoadipic acid', '3-Oxoadipic acid', '2-Methyl-4-oxopentanedioic acid', '3-Methyl-3-hydroxypentanedioate']	C6H8O5	HMDB00225;HMDB00398;HMDB39447;HMDB59737	LMFA01170121;LMFA01170096;
1677	Silver	Polar metabolomics	Ag NP-NM300K 24h	453.924	0.647	0.00884
1678	Silver	Polar metabolomics	Ag NP-NM300K 24h	461.869	0.646	0.000277
1679	Silver	Polar metabolomics	Ag NP-NM300K 24h	332.095	0.642	0.023	['N-Acetylneuraminic acid', 'N-Acetyl-a-neuraminic acid']	C11H19NO9	HMDB00230;HMDB00773
1680	Silver	Polar metabolomics	Ag NP-NM300K 24h	289.936	0.641	0.0186
1681	Silver	Polar metabolomics	Ag NP-NM300K 24h	290.001	0.64	0.0151
1682	Silver	Polar metabolomics	Ag NP-NM300K 24h	286.021	0.636	0.0127
1683	Silver	Polar metabolomics	Ag NP-NM300K 24h	441.931	0.635	0.000339
1684	Silver	Polar metabolomics	Ag NP-NM300K 24h	311.983	0.632	0.0119
1685	Silver	Polar metabolomics	Ag NP-NM300K 24h	405.907	0.632	0.00197
1686	Silver	Polar metabolomics	Ag NP-NM300K 24h	487.892	0.63	0.000609
1687	Silver	Polar metabolomics	Ag NP-NM300K 24h	184.058	0.629	0.0092	['Aminoadipic acid', 'Acetylhomoserine', 'Glutamate, gamma-methyl ester']	C6H11NO4	HMDB00510;HMDB29423;HMDB61715	LMFA01170098;
1688	Silver	Polar metabolomics	Ag NP-NM300K 24h	285.051	0.627	0.00269
1689	Silver	Polar metabolomics	Ag NP-NM300K 24h	216.015	0.626	0.00225	['Phosphocreatinine']	C4H8N3O4P	HMDB41624
1690	Silver	Polar metabolomics	Ag NP-NM300K 24h	387.881	0.625	0.00168
1691	Silver	Polar metabolomics	Ag NP-NM300K 24h	170.042	0.623	0.0179	['L-Glutamic acid', 'N-Methyl-D-aspartic acid', 'N-Acetylserine', 'O-Acetylserine', 'D-Glutamic acid', 'L-4-Hydroxyglutamate semialdehyde', '3-(Carboxymethylamino)propanoic acid', 'DL-Glutamate']	C5H9NO4	HMDB00148;HMDB02393;HMDB02931;HMDB03011;HMDB03339;HMDB06556;HMDB33550;HMDB60475
1692	Silver	Polar metabolomics	Ag NP-NM300K 24h	485.895	0.623	0.00054
1693	Silver	Polar metabolomics	Ag NP-NM300K 24h	403.91	0.621	0.000299
1694	Silver	Polar metabolomics	Ag NP-NM300K 24h	473.005	0.621	0.0406
1695	Silver	Polar metabolomics	Ag NP-NM300K 24h	493.982	0.617	0.00213
1696	Silver	Polar metabolomics	Ag NP-NM300K 24h	373.029	0.616	0.00273
1697	Silver	Polar metabolomics	Ag NP-NM300K 24h	347.949	0.615	0.00182
1698	Silver	Polar metabolomics	Ag NP-NM300K 24h	315.962	0.614	0.000434
1699	Silver	Polar metabolomics	Ag NP-NM300K 24h	193.028	0.613	0.0122
1700	Silver	Polar metabolomics	Ag NP-NM300K 24h	343.955	0.612	0.000704
1701	Silver	Polar metabolomics	Ag NP-NM300K 24h	405.954	0.609	0.00247
1702	Silver	Polar metabolomics	Ag NP-NM300K 24h	265.957	0.607	0.0227
1703	Silver	Polar metabolomics	Ag NP-NM300K 24h	321.972	0.607	0.000609
1704	Silver	Polar metabolomics	Ag NP-NM300K 24h	345.951	0.607	0.000913
1705	Silver	Polar metabolomics	Ag NP-NM300K 24h	463.913	0.607	0.00225
1706	Silver	Polar metabolomics	Ag NP-NM300K 24h	287.939	0.606	0.023
1707	Silver	Polar metabolomics	Ag NP-NM300K 24h	171.046	0.603	0.014
1708	Silver	Polar metabolomics	Ag NP-NM300K 24h	285.995	0.603	0.00273
1709	Silver	Polar metabolomics	Ag NP-NM300K 24h	323.97	0.602	0.000704
1710	Silver	Polar metabolomics	Ag NP-NM300K 24h	185.07	0.6	0.0472
1711	Silver	Polar metabolomics	Ag NP-NM300K 24h	156.027	0.598	0.023	['L-Aspartic acid', 'D-Aspartic acid', 'Iminodiacetic acid']	C4H7NO4	HMDB00191;HMDB06483;HMDB11753
1712	Silver	Polar metabolomics	Ag NP-NM300K 24h	379.931	0.598	0.00182
1713	Silver	Polar metabolomics	Ag NP-NM300K 24h	395.905	0.598	0.0143
1714	Silver	Polar metabolomics	Ag NP-NM300K 24h	209.063	0.596	0.0289
1715	Silver	Polar metabolomics	Ag NP-NM300K 24h	257.949	0.596	0.0201
1716	Silver	Polar metabolomics	Ag NP-NM300K 24h	186.078	0.595	0.027
1717	Silver	Polar metabolomics	Ag NP-NM300K 24h	319.949	0.595	0.0228
1718	Silver	Polar metabolomics	Ag NP-NM300K 24h	184.073	0.594	0.011	['3-Dehydroxycarnitine'];['Tryptophanol', '(R)-Boschniakine', '1-(2,3-Dihydro-1H-pyrrolizin-5-yl)-2-propen-1-one', '3-[(5-Methyl-2-furanyl)methyl]-1H-pyrrole', '3,4-Dihydro-4-[(5-methyl-2-furanyl)methylene]-2H-pyrrole']	C7H15NO2;C10H11NO	HMDB06831;HMDB03447;HMDB30267;HMDB40028;HMDB40042;HMDB40048
1719	Silver	Polar metabolomics	Ag NP-NM300K 24h	207.998	0.594	0.0472	['Taurocyamine'];['Phosphoserine', 'DL-O-Phosphoserine']	C3H9N3O3S;C3H8NO6P	HMDB03584;HMDB00272;HMDB01721
1720	Silver	Polar metabolomics	Ag NP-NM300K 24h	297.967	0.594	0.0109
1721	Silver	Polar metabolomics	Ag NP-NM300K 24h	287.993	0.593	0.004
1722	Silver	Polar metabolomics	Ag NP-NM300K 24h	359.928	0.59	0.00474
1723	Silver	Polar metabolomics	Ag NP-NM300K 24h	178.946	0.587	0.0304
1724	Silver	Polar metabolomics	Ag NP-NM300K 24h	229.98	0.587	0.0497
1725	Silver	Polar metabolomics	Ag NP-NM300K 24h	443.929	0.586	0.00404
1726	Silver	Polar metabolomics	Ag NP-NM300K 24h	286.999	0.585	0.00608	['4-Methoxyphenylethanol sulfate']	C9H12O6S	HMDB29229
1727	Silver	Polar metabolomics	Ag NP-NM300K 24h	193.983	0.583	0.0158
1728	Silver	Polar metabolomics	Ag NP-NM300K 24h	273.923	0.582	0.0293
1729	Silver	Polar metabolomics	Ag NP-NM300K 24h	266.011	0.58	0.00893
1730	Silver	Polar metabolomics	Ag NP-NM300K 24h	277.989	0.58	0.0126
1731	Silver	Polar metabolomics	Ag NP-NM300K 24h	186.016	0.578	0.0468	['L-Glutamic acid', 'N-Methyl-D-aspartic acid', 'N-Acetylserine', 'O-Acetylserine', 'D-Glutamic acid', 'L-4-Hydroxyglutamate semialdehyde', '3-(Carboxymethylamino)propanoic acid', 'DL-Glutamate'];['Phosphoserine', 'DL-O-Phosphoserine']	C5H9NO4;C3H8NO6P	HMDB00148;HMDB02393;HMDB02931;HMDB03011;HMDB03339;HMDB06556;HMDB33550;HMDB60475;HMDB00272;HMDB01721
1732	Silver	Polar metabolomics	Ag NP-NM300K 24h	427.937	0.576	0.00726
1733	Silver	Polar metabolomics	Ag NP-NM300K 24h	178.009	0.575	0.0177	['2,4-Dimethyl-5-vinylthiazole'];['Trigonelline', '2-Aminobenzoic acid', 'p-Aminobenzoic acid', '3-Pyridylacetic acid', 'm-Aminobenzoic acid', 'Salicylamide', 'Methyl nicotinate', '2-Pyridylacetic acid']	C7H9NS;C7H7NO2	HMDB37285;HMDB00875;HMDB01123;HMDB01392;HMDB01538;HMDB01891;HMDB15687;HMDB29806;HMDB60722
1734	Silver	Polar metabolomics	Ag NP-NM300K 24h	265.017	0.575	0.00979
1735	Silver	Polar metabolomics	Ag NP-NM300K 24h	264.014	0.574	0.00674
1736	Silver	Polar metabolomics	Ag NP-NM300K 24h	304.032	0.567	0.0163
1737	Silver	Polar metabolomics	Ag NP-NM300K 24h	267.014	0.561	0.0116	['L-2-Aminoethyl seryl phosphate']	C5H13N2O6P	HMDB31950
1738	Silver	Polar metabolomics	Ag NP-NM300K 24h	316.891	0.561	0.00346
1739	Silver	Polar metabolomics	Ag NP-NM300K 24h	273.051	0.555	0.0103	['Gamma-Glutamylcysteine']	C8H14N2O5S	HMDB01049
1740	Silver	Polar metabolomics	Ag NP-NM300K 24h	303.913	0.55	0.0188
1741	Silver	Polar metabolomics	Ag NP-NM300K 24h	487.975	0.55	0.00481
1742	Silver	Polar metabolomics	Ag NP-NM300K 24h	326.014	0.548	0.00726
1743	Silver	Polar metabolomics	Ag NP-NM300K 24h	236.951	0.547	0.00261
1744	Silver	Polar metabolomics	Ag NP-NM300K 24h	347.996	0.547	0.00979
1745	Silver	Polar metabolomics	Ag NP-NM300K 24h	259.978	0.546	0.000704
1746	Silver	Polar metabolomics	Ag NP-NM300K 24h	185.077	0.544	0.00611	['Caprylic acid', 'Valproic acid', 'Hexyl acetate', '(3R,5Z)-5-Octene-1,3-diol', '2-Ethylhexanoic acid', '1-Hydroxy-3-octanone', 'Methyl heptanoate', '2-Methylheptanoic acid', '6-Methylheptanoic acid', 'Methyl 5-methylhexanoate', 'Pentyl propanoate', '2-Ethylbutyl acetate', 'Isopropyl 3-methylbutanoate', 'Propyl 3-methylbutanoate', 'cis- and trans-2-Isobutyl-4-methyl-1,3-dioxolane', '1,1-Dimethox…	C8H16O2	HMDB00482;HMDB01877;HMDB29980;HMDB30368;HMDB31230;HMDB31290;HMDB31478;HMDB31587;HMDB31588;HMDB31596;HMDB31638;HMDB31703;HMDB32046;HMDB32047;HMDB32203;HMDB32225;HMDB32272;HMDB32335;HMDB32551;HMDB34161;HMDB34164;HMDB34459;HMDB36165;HMDB39217;HMDB39620;HMDB40209;HMDB40251;HMDB40252;HMDB40296;HMDB40298;HMDB61931	LMFA01010008;LMFA01020291;
1747	Silver	Polar metabolomics	Ag NP-NM300K 24h	224.033	0.544	0.0265
1748	Silver	Polar metabolomics	Ag NP-NM300K 24h	280.991	0.54	0.00979
1749	Silver	Polar metabolomics	Ag NP-NM300K 24h	237.996	0.539	0.00157
1750	Silver	Polar metabolomics	Ag NP-NM300K 24h	256.007	0.539	0.00183
1751	Silver	Polar metabolomics	Ag NP-NM300K 24h	419.884	0.539	0.0116
1752	Silver	Polar metabolomics	Ag NP-NM300K 24h	417.887	0.538	0.00599
1753	Silver	Polar metabolomics	Ag NP-NM300K 24h	164.117	0.536	0.0144
1754	Silver	Polar metabolomics	Ag NP-NM300K 24h	308.004	0.536	0.023
1755	Silver	Polar metabolomics	Ag NP-NM300K 24h	533.804	0.534	0.000434
1756	Silver	Polar metabolomics	Ag NP-NM300K 24h	535.122	0.532	0.0116	['Musabalbisiane A', ""(R)-Isobyakangelicin 3'-glucoside"", ""(R)-Byakangelicin 3'-glucoside"", ""(R)-Byakangelicin 2'-glucoside"", 'Mycophenolic acid O-acyl-glucuronide', 'Mycophenolic acid glucuronide']	C23H28O12	HMDB38680;HMDB39026;HMDB39069;HMDB39070;HMDB60491;HMDB60634
1757	Silver	Polar metabolomics	Ag NP-NM300K 24h	162.113	0.531	0.0233	['L-Carnitine']	C7H15NO3	HMDB00062
1758	Silver	Polar metabolomics	Ag NP-NM300K 24h	168.964	0.53	0.0466
1759	Silver	Polar metabolomics	Ag NP-NM300K 24h	303.967	0.53	0.0179
1760	Silver	Polar metabolomics	Ag NP-NM300K 24h	301.97	0.527	0.0122
1761	Silver	Polar metabolomics	Ag NP-NM300K 24h	218.072	0.526	0.0237
1762	Silver	Polar metabolomics	Ag NP-NM300K 24h	298.952	0.526	0.000339
1763	Silver	Polar metabolomics	Ag NP-NM300K 24h	163.116	0.521	0.0181
1764	Silver	Polar metabolomics	Ag NP-NM300K 24h	279.988	0.521	0.0274
1765	Silver	Polar metabolomics	Ag NP-NM300K 24h	132.987	0.518	0.000339
1766	Silver	Polar metabolomics	Ag NP-NM300K 24h	280.129	0.518	0.0392	['Asparaginyl-Phenylalanine', 'Phenylalanyl-Asparagine'];['Benzphetamine']	C13H17N3O4;C17H21N	HMDB28738;HMDB28990;HMDB15003
1767	Silver	Polar metabolomics	Ag NP-NM300K 24h	245.014	0.5	0.0127	['2-Methyl-3 or 5 or 6-(furfurylthio)pyrazine (mixture of isomers)', '2-[(2-Furanylmethyl)thio]-6-methylpyrazine']	C10H10N2OS	HMDB32414;HMDB36187
1768	Silver	Polar metabolomics	Ag NP-NM300K 24h	258.933	0.496	0.000299
1769	Silver	Polar metabolomics	Ag NP-NM300K 24h	281.985	0.495	0.0127
1770	Silver	Polar metabolomics	Ag NP-NM300K 24h	178.993	0.489	0.00295	['2-Methoxybenzenethiol', 'Kahweofuran', '2-Acetyl-5-methylthiophene', '2-Propanoylthiophene', '2-(Methylthio)phenol', '2-Acetyl-3-methylthiophene'];['4-Hydroxybenzoic acid', 'Salicylic acid', '3-Hydroxybenzoic acid', 'Gentisate aldehyde', '2-Methoxy-1,4-benzoquinone', 'alpha-Furyl methyl diketone', 'Sesamol', '3,4-Dihydroxybenzaldehyde']	C7H8OS;C7H6O3	HMDB32571;HMDB32922;HMDB33130;HMDB33159;HMDB41281;HMDB41502;HMDB00500;HMDB01895;HMDB02466;HMDB04062;HMDB32576;HMDB32920;HMDB33812;HMDB59965
1771	Silver	Polar metabolomics	Ag NP-NM300K 24h	217.068	0.488	0.0238	['D-4-O-Methyl-myo-inositol', '4-O-Methyl-myo-inositol', 'Methyl beta-D-glucopyranoside', '(-)-Bornesitol', 'Sequoyitol', 'Mytilitol', 'D-Pinitol', 'L-Quebrachitol', 'L-Pinitol']	C7H14O6	HMDB29915;HMDB29916;HMDB29965;HMDB31437;HMDB31449;HMDB33816;HMDB34219;HMDB34221;HMDB34222
1772	Silver	Polar metabolomics	Ag NP-NM300K 24h	207.058	0.486	0.0392	['2-Methyl-3 or 5 or 6-(furfurylthio)pyrazine (mixture of isomers)', '2-[(2-Furanylmethyl)thio]-6-methylpyrazine'];['Cyromazine']	C10H10N2OS;C6H10N6	HMDB32414;HMDB36187;HMDB29862
1773	Silver	Polar metabolomics	Ag NP-NM300K 24h	274.907	0.478	0.00264
1774	Silver	Polar metabolomics	Ag NP-NM300K 24h	337.946	0.478	0.0076
1775	Silver	Polar metabolomics	Ag NP-NM300K 24h	207.052	0.474	0.0352
1776	Silver	Polar metabolomics	Ag NP-NM300K 24h	169.058	0.463	0.0128	['L-Glutamine', 'Ureidoisobutyric acid', 'D-Glutamine', 'Alanylglycine', 'Alanyl-Glycine']	C5H10N2O3	HMDB00641;HMDB02031;HMDB03423;HMDB06899;HMDB28687
1777	Silver	Polar metabolomics	Ag NP-NM300K 24h	208.062	0.463	0.0472
1778	Silver	Polar metabolomics	Ag NP-NM300K 24h	157.011	0.459	0.00464	['L-Malic acid', 'Malic acid', 'D-Malic acid', 'Velcorin']	C4H6O5	HMDB00156;HMDB00744;HMDB31518;HMDB32872
1779	Silver	Polar metabolomics	Ag NP-NM300K 24h	258.11	0.457	0.0317	['Miglustat'];['Glycerophosphocholine'];['Pandamarilactam 3x']	C10H21NO4;C8H20NO6P;C13H17NO3	HMDB14563;HMDB00086;HMDB33610
1780	Silver	Polar metabolomics	Ag NP-NM300K 24h	224.027	0.432	0.0495
1781	Silver	Polar metabolomics	Ag NP-NM300K 24h	191.04	0.349	0.00464	['6-Methylnicotinamide', '2-Acetyl-3-ethylpyrazine', '7,8-Dihydro-3-methylpyrrolo[1,2-a]pyrimidin-2(6H)-one', '2-Acetyl-3,6-dimethylpyrazine', '2-Acetyl-3,5-dimethylpyrazine']	C8H10N2O	HMDB13704;HMDB29410;HMDB38513;HMDB39998;HMDB39999
1782	Silver	Polar metabolomics	Ag NP-NM300K 24h	280.092	0.334	0.0128	['2,4-Undecadiene-8,10-diynoic acid 2,3-dehydropiperidide'];['Glycerophosphocholine']	C16H17NO;C8H20NO6P	HMDB33525;HMDB00086
1783	Silver	Polar metabolomics	Ag NP-NM300K 24h	190.993	0.165	1.15e-05	['S-Methyl benzenecarbothioate'];['Phenylglyoxylic acid', '(E)-8-Hydroxy-2-octene-4,6-diynoic acid', '4-Hydroxyphthalide', '3,4-Methylenedioxybenzaldehyde', '1,4-Benzodioxin-2(3H)-one']	C8H8OS;C8H6O3	HMDB29694;HMDB01587;HMDB31515;HMDB32598;HMDB32612;HMDB40528
1784	Silver	Polar metabolomics	Ag NP-NM300K 24h	271.036	0.128	0.000704
1785	Silver	Polar metabolomics	Ag MP 01h	528.072	1.843	0.0388
1786	Silver	Polar metabolomics	Ag MP 01h	373.029	0.41	0.00383
1787	Silver	Polar metabolomics	Ag MP 06h	122.027	5.288	0.00109	['L-Cysteine', 'D-Cysteine']	C3H7NO2S	HMDB00574;HMDB03417
1788	Silver	Polar metabolomics	Ag MP 06h	124.037	1.257	0.0204	['L-3-Aminodihydro-2(3H)-furanone', '(S)-2-Azetidinecarboxylic acid', '1-Aminocyclopropanecarboxylic acid']	C4H7NO2	HMDB29387;HMDB29615;HMDB36458
1789	Silver	Polar metabolomics	Ag MP 06h	124.937	0.735	0.0495
1790	Silver	Polar metabolomics	Ag MP 06h	136.048	0.657	0.0476	['Creatinine']	C4H7N3O	HMDB00562
1791	Silver	Polar metabolomics	Ag MP 06h	138.906	0.725	0.0331
1792	Silver	Polar metabolomics	Ag MP 06h	140.904	0.724	0.0254
1793	Silver	Polar metabolomics	Ag MP 06h	142.901	0.73	0.0302
1794	Silver	Polar metabolomics	Ag MP 06h	142.948	0.707	0.0397
1795	Silver	Polar metabolomics	Ag MP 06h	144.952	0.685	0.0397
1796	Silver	Polar metabolomics	Ag MP 06h	145.037	0.571	0.044	['Niacinamide', '2-Acetylpyrazine']	C6H6N2O	HMDB01406;HMDB31861
1797	Silver	Polar metabolomics	Ag MP 06h	148.935	0.73	0.0278
1798	Silver	Polar metabolomics	Ag MP 06h	149.939	0.724	0.0278
1799	Silver	Polar metabolomics	Ag MP 06h	150.932	0.716	0.0204
1800	Silver	Polar metabolomics	Ag MP 06h	160.926	0.784	0.0354
1801	Silver	Polar metabolomics	Ag MP 06h	161.019	0.758	0.0302	['4-Hydroxystyrene', 'Phenylacetaldehyde', '2,3-Dihydrobenzofuran', '2-Methylbenzaldehyde', '3-Methylbenzaldehyde', '4-Methylbenzaldehyde', 'Acetophenone', 'Lentialexin']	C8H8O	HMDB04072;HMDB06236;HMDB13815;HMDB29636;HMDB29637;HMDB29638;HMDB33910;HMDB38997
1802	Silver	Polar metabolomics	Ag MP 06h	164.93	0.707	0.018
1803	Silver	Polar metabolomics	Ag MP 06h	165.934	0.689	0.00805
1804	Silver	Polar metabolomics	Ag MP 06h	166.934	0.695	0.0109
1805	Silver	Polar metabolomics	Ag MP 06h	169.011	1.379	0.0278	['Oxoglutaric acid', '3-Oxoglutaric acid']	C5H6O5	HMDB00208;HMDB13701
1806	Silver	Polar metabolomics	Ag MP 06h	170.042	0.67	0.0456	['L-Glutamic acid', 'N-Methyl-D-aspartic acid', 'N-Acetylserine', 'O-Acetylserine', 'D-Glutamic acid', 'L-4-Hydroxyglutamate semialdehyde', '3-(Carboxymethylamino)propanoic acid', 'DL-Glutamate']	C5H9NO4	HMDB00148;HMDB02393;HMDB02931;HMDB03011;HMDB03339;HMDB06556;HMDB33550;HMDB60475
1807	Silver	Polar metabolomics	Ag MP 06h	171.046	0.673	0.0349
1808	Silver	Polar metabolomics	Ag MP 06h	172.058	0.642	0.0347
1809	Silver	Polar metabolomics	Ag MP 06h	176.038	2.949	0.000181
1810	Silver	Polar metabolomics	Ag MP 06h	176.105	0.769	0.0346	['psi-Pelletierine', '2-Methyl-4-pentyloxazole', '4-Methyl-2-pentyloxazole', '5-Butyl-2-ethyloxazole', '2-Ethyl-4-methyl-5-propyloxazole', '4-Ethyl-2-methyl-5-propyloxazole', '5-Ethyl-4-methyl-2-(1-methylethyl)oxazole', '2-Butyl-4,5-dimethyloxazole', '5-Ethyl-2-methyl-4-propyloxazole', '4-Ethyl-5-methyl-2-(1-methylethyl)oxazole', '4-Butyl-2,5-dimethyloxazole', '2-Isobutyl-4,5-dimethyloxazole', '4…	C9H15NO	HMDB34580;HMDB37856;HMDB37857;HMDB37862;HMDB37872;HMDB37873;HMDB37874;HMDB37875;HMDB37876;HMDB37878;HMDB37879;HMDB37880;HMDB37881;HMDB37882
1811	Silver	Polar metabolomics	Ag MP 06h	178.009	0.646	0.0198	['2,4-Dimethyl-5-vinylthiazole'];['Trigonelline', '2-Aminobenzoic acid', 'p-Aminobenzoic acid', '3-Pyridylacetic acid', 'm-Aminobenzoic acid', 'Salicylamide', 'Methyl nicotinate', '2-Pyridylacetic acid']	C7H9NS;C7H7NO2	HMDB37285;HMDB00875;HMDB01123;HMDB01392;HMDB01538;HMDB01891;HMDB15687;HMDB29806;HMDB60722
1812	Silver	Polar metabolomics	Ag MP 06h	179.049	1.478	0.0278	['Cysteinylglycine', 'Cysteinyl-Glycine', 'Glycyl-Cysteine']	C5H10N2O3S	HMDB00078;HMDB28775;HMDB28838
1813	Silver	Polar metabolomics	Ag MP 06h	180.904	0.818	0.0397
1814	Silver	Polar metabolomics	Ag MP 06h	182.902	0.801	0.0226
1815	Silver	Polar metabolomics	Ag MP 06h	184.058	0.623	0.0247	['Aminoadipic acid', 'Acetylhomoserine', 'Glutamate, gamma-methyl ester']	C6H11NO4	HMDB00510;HMDB29423;HMDB61715	LMFA01170098;
1816	Silver	Polar metabolomics	Ag MP 06h	186.019	0.636	0.0177	['Acetylcysteine']	C5H9NO3S	HMDB01890
1817	Silver	Polar metabolomics	Ag MP 06h	186.912	0.813	0.0186
1818	Silver	Polar metabolomics	Ag MP 06h	190.047	0.667	0.0198	['Pyridoxal', 'Isopyridoxal', '3alpha,4,5,7alpha-Tetrahydro-5-hydroxy-1H-isoindole-1,3(2H)-dione', '3alpha,4,7,7alpha-Tetrahydro-4-hydroxy-1H-isoindole-1,3(2H)-dione', '3-Methoxyanthranilate']	C8H9NO3	HMDB01545;HMDB04290;HMDB34887;HMDB34889;HMDB60374
1819	Silver	Polar metabolomics	Ag MP 06h	191.029	0.798	0.0456	['Hydrocinnamic acid', '4-Ethylbenzoic acid', '3-Methylphenylacetic acid', '3,4-Dimethylbenzoic acid', '4-Coumaryl alcohol', '2-Phenylpropionate', '2-Methoxy-4-vinylphenol', 'Benzyl acetate', 'o-Tolyl acetate', 'p-Tolyl acetate', ""2'-Methoxyacetophenone"", ""4'-Methoxyacetophenone"", ""2'-Hydroxy-5'-methylacetophenone"", 'Methyl phenylacetate', 'Ethyl benzoate', '4-Ethoxybenzaldehyde', '1-Phenyl…	C9H10O2	HMDB00764;HMDB02097;HMDB02222;HMDB02237;HMDB03654;HMDB11743;HMDB13744;HMDB31310;HMDB32073;HMDB32075;HMDB32569;HMDB32570;HMDB32592;HMDB32617;HMDB33967;HMDB33970;HMDB37715;HMDB38355;HMDB40428;HMDB40925;HMDB59824
1820	Silver	Polar metabolomics	Ag MP 06h	191.048	0.226	0.0162
1821	Silver	Polar metabolomics	Ag MP 06h	193.983	0.679	0.044
1822	Silver	Polar metabolomics	Ag MP 06h	196.865	0.722	0.0346
1823	Silver	Polar metabolomics	Ag MP 06h	198.862	0.724	0.0389
1824	Silver	Polar metabolomics	Ag MP 06h	200.859	0.718	0.0278
1825	Silver	Polar metabolomics	Ag MP 06h	200.907	0.697	0.0151
1826	Silver	Polar metabolomics	Ag MP 06h	202.856	0.745	0.0398
1827	Silver	Polar metabolomics	Ag MP 06h	202.904	0.682	0.0149
1828	Silver	Polar metabolomics	Ag MP 06h	205.126	0.718	0.0397
1829	Silver	Polar metabolomics	Ag MP 06h	206.894	0.725	0.0278
1830	Silver	Polar metabolomics	Ag MP 06h	208.891	0.696	0.0177
1831	Silver	Polar metabolomics	Ag MP 06h	210.888	0.707	0.0191
1832	Silver	Polar metabolomics	Ag MP 06h	210.935	0.677	0.0138
1833	Silver	Polar metabolomics	Ag MP 06h	215.042	0.748	0.0428
1834	Silver	Polar metabolomics	Ag MP 06h	216.881	0.809	0.0397
1835	Silver	Polar metabolomics	Ag MP 06h	218.072	0.571	0.0405
1836	Silver	Polar metabolomics	Ag MP 06h	222.889	0.7	0.00934
1837	Silver	Polar metabolomics	Ag MP 06h	223.055	0.794	0.0186	['Amyl 2-furoate', '4-Ethyl-2,6-dimethoxyphenol', 'Verimol J', '4-(Ethoxymethyl)-2-methoxyphenol', 'Furfuryl pentanoate', 'Peperinic acid', '2-Ethoxy-4-(methoxymethyl)phenol', 'Furfuryl isovalerate', 'Isoamyl 2-furoate']	C10H14O3	HMDB29456;HMDB33394;HMDB36522;HMDB37641;HMDB37727;HMDB38181;HMDB38354;HMDB39874;HMDB59891
1838	Silver	Polar metabolomics	Ag MP 06h	224.886	0.715	0.012
1839	Silver	Polar metabolomics	Ag MP 06h	224.893	0.718	0.00174
1840	Silver	Polar metabolomics	Ag MP 06h	226.105	0.696	0.0336	['L-Acetylcarnitine']	C9H17NO4	HMDB00201
1841	Silver	Polar metabolomics	Ag MP 06h	226.89	0.769	0.0278
1842	Silver	Polar metabolomics	Ag MP 06h	227.108	0.719	0.0349
1843	Silver	Polar metabolomics	Ag MP 06h	231.06	0.716	0.0204	['1-(4-Methoxyphenyl)-1-penten-3-one', '3-(2-Methylpropylidene)-3alpha,4-dihydro-1(3H)-isobenzofuranone', '(S)-3-Butyl-1(3H)-isobenzofuranone', 'Benzyl trans-2-methyl-2-butenoate', 'Prenyl benzoate', '(R)-3,7-Dimethyl-5-indanecarboxylic acid', 'Ligustilide', 'Benzyl tiglate', 'Propyl cinnamate', 'Isopropyl cinnamate', 'Cinnamyl propionate']	C12H14O2	HMDB30905;HMDB32027;HMDB32064;HMDB32177;HMDB32488;HMDB33033;HMDB34277;HMDB37627;HMDB37700;HMDB37701;HMDB41315
1844	Silver	Polar metabolomics	Ag MP 06h	232.917	0.845	0.0495
1845	Silver	Polar metabolomics	Ag MP 06h	234.035	0.694	0.0349	['Phenylacetylglycine', 'Methylhippuric acid', '2-Methylhippuric acid', 'm-Methylhippuric acid', 'p-Methylhippuric acid', 'Methyl n-acetylanthranilate', 'Betamipron', '3-Carbamoyl-2-phenylpropionaldehyde', '4-Hydroxy-5-phenyltetrahydro-1,3-oxazin-2-one', '4-Anilino-4-oxobutanoic acid']	C10H11NO3	HMDB00821;HMDB00859;HMDB11723;HMDB13245;HMDB13292;HMDB32388;HMDB34250;HMDB60366;HMDB60389;HMDB60758
1846	Silver	Polar metabolomics	Ag MP 06h	235.996	0.57	0.00494
1847	Silver	Polar metabolomics	Ag MP 06h	236.951	1.715	0.000181
1848	Silver	Polar metabolomics	Ag MP 06h	240.859	0.796	0.0149
1849	Silver	Polar metabolomics	Ag MP 06h	242.858	0.889	0.0343
1850	Silver	Polar metabolomics	Ag MP 06h	244.87	0.759	0.00805
1851	Silver	Polar metabolomics	Ag MP 06h	246.867	0.756	0.00993
1852	Silver	Polar metabolomics	Ag MP 06h	249.046	1.313	0.0495
1853	Silver	Polar metabolomics	Ag MP 06h	250.214	1.376	0.0162
1854	Silver	Polar metabolomics	Ag MP 06h	257.949	0.688	0.0264
1855	Silver	Polar metabolomics	Ag MP 06h	258.865	0.732	0.0186
1856	Silver	Polar metabolomics	Ag MP 06h	260.862	0.721	0.0162
1857	Silver	Polar metabolomics	Ag MP 06h	262.859	0.734	0.0204
1858	Silver	Polar metabolomics	Ag MP 06h	262.907	0.722	0.0456
1859	Silver	Polar metabolomics	Ag MP 06h	264.852	0.696	0.0264
1860	Silver	Polar metabolomics	Ag MP 06h	265.856	0.691	0.0241
1861	Silver	Polar metabolomics	Ag MP 06h	266.849	0.709	0.0397
1862	Silver	Polar metabolomics	Ag MP 06h	267.853	0.687	0.0151
1863	Silver	Polar metabolomics	Ag MP 06h	268.846	0.709	0.0456
1864	Silver	Polar metabolomics	Ag MP 06h	270.014	0.632	0.018	['Lamivudine'];[""Pyridoxal 5'-phosphate""]	C8H11N3O3S;C8H10NO6P	HMDB14847;HMDB01491
1865	Silver	Polar metabolomics	Ag MP 06h	270.843	0.706	0.0397
1866	Silver	Polar metabolomics	Ag MP 06h	270.891	0.647	0.0301
1867	Silver	Polar metabolomics	Ag MP 06h	271.036	0.271	0.00153
1868	Silver	Polar metabolomics	Ag MP 06h	273.051	0.559	0.0343	['Gamma-Glutamylcysteine']	C8H14N2O5S	HMDB01049
1869	Silver	Polar metabolomics	Ag MP 06h	274.089	0.512	0.0455	['Modafinil'];['Muramic acid', 'N-(1-Deoxy-1-fructosyl)alanine']	C15H15NO2S;C9H17NO7	HMDB14883;HMDB03254;HMDB38662
1870	Silver	Polar metabolomics	Ag MP 06h	274.839	0.818	0.0124
1871	Silver	Polar metabolomics	Ag MP 06h	274.881	0.793	0.0354
1872	Silver	Polar metabolomics	Ag MP 06h	275.885	0.806	0.0479
1873	Silver	Polar metabolomics	Ag MP 06h	276.836	0.827	0.0447
1874	Silver	Polar metabolomics	Ag MP 06h	276.878	0.81	0.0479
1875	Silver	Polar metabolomics	Ag MP 06h	278.245	1.383	0.0479	['Palmitic amide']	C16H33NO	HMDB12273	LMFA08010009
1876	Silver	Polar metabolomics	Ag MP 06h	278.833	0.828	0.0347
1877	Silver	Polar metabolomics	Ag MP 06h	278.875	0.806	0.0317
1878	Silver	Polar metabolomics	Ag MP 06h	278.881	0.828	0.0278
1879	Silver	Polar metabolomics	Ag MP 06h	280.847	0.703	0.012
1880	Silver	Polar metabolomics	Ag MP 06h	280.879	0.791	0.0162
1881	Silver	Polar metabolomics	Ag MP 06h	280.977	0.768	0.0494
1882	Silver	Polar metabolomics	Ag MP 06h	282.844	0.718	0.018
1883	Silver	Polar metabolomics	Ag MP 06h	284.841	0.7	0.0124
1884	Silver	Polar metabolomics	Ag MP 06h	284.868	0.735	0.044
1885	Silver	Polar metabolomics	Ag MP 06h	284.889	0.719	0.0397
1886	Silver	Polar metabolomics	Ag MP 06h	285.051	0.838	0.0428
1887	Silver	Polar metabolomics	Ag MP 06h	286.893	0.685	0.0237
1888	Silver	Polar metabolomics	Ag MP 06h	289.006	2.023	0.0191
1889	Silver	Polar metabolomics	Ag MP 06h	290.001	0.671	0.0278
1890	Silver	Polar metabolomics	Ag MP 06h	290.876	0.774	0.0204
1891	Silver	Polar metabolomics	Ag MP 06h	291.879	0.782	0.0349
1892	Silver	Polar metabolomics	Ag MP 06h	292.873	0.767	0.0241
1893	Silver	Polar metabolomics	Ag MP 06h	294.002	0.48	0.00529
1894	Silver	Polar metabolomics	Ag MP 06h	296.821	0.808	0.0397
1895	Silver	Polar metabolomics	Ag MP 06h	298.818	0.797	0.0456
1896	Silver	Polar metabolomics	Ag MP 06h	300.816	0.808	0.0328
1897	Silver	Polar metabolomics	Ag MP 06h	300.863	0.793	0.0147
1898	Silver	Polar metabolomics	Ag MP 06h	302.829	0.754	0.0191
1899	Silver	Polar metabolomics	Ag MP 06h	302.861	0.857	0.0367
1900	Silver	Polar metabolomics	Ag MP 06h	303.148	0.718	0.0495
1901	Silver	Polar metabolomics	Ag MP 06h	304.826	0.755	0.0186
1902	Silver	Polar metabolomics	Ag MP 06h	306.276	1.426	0.0349	['Octadecanamide']	C18H37NO	HMDB34146
1903	Silver	Polar metabolomics	Ag MP 06h	306.823	0.756	0.0349
1904	Silver	Polar metabolomics	Ag MP 06h	306.871	0.749	0.0191
1905	Silver	Polar metabolomics	Ag MP 06h	310.057	0.32	0.000428
1906	Silver	Polar metabolomics	Ag MP 06h	311.983	0.686	0.0495
1907	Silver	Polar metabolomics	Ag MP 06h	316.824	0.741	0.0331
1908	Silver	Polar metabolomics	Ag MP 06h	318.821	0.734	0.0301
1909	Silver	Polar metabolomics	Ag MP 06h	319.949	0.731	0.0456
1910	Silver	Polar metabolomics	Ag MP 06h	320.818	0.724	0.0374
1911	Silver	Polar metabolomics	Ag MP 06h	320.865	0.738	0.0254
1912	Silver	Polar metabolomics	Ag MP 06h	320.967	1.115	0.0237
1913	Silver	Polar metabolomics	Ag MP 06h	322.862	0.732	0.0206
1914	Silver	Polar metabolomics	Ag MP 06h	323.814	0.752	0.0398
1915	Silver	Polar metabolomics	Ag MP 06h	324.808	0.708	0.0447
1916	Silver	Polar metabolomics	Ag MP 06h	326.805	0.71	0.0495
1917	Silver	Polar metabolomics	Ag MP 06h	332.798	0.832	0.0477
1918	Silver	Polar metabolomics	Ag MP 06h	334.795	0.823	0.0278
1919	Silver	Polar metabolomics	Ag MP 06h	336.839	0.809	0.00805
1920	Silver	Polar metabolomics	Ag MP 06h	337.105	1.522	0.0456	['Toxin T2 tetrol', '3,7,8,15-Scirpenetetrol'];['(-)-3,4,9-Trimethoxypterocarpan', 'p-Hydroxyphenethyl trans-ferulate', ""2'-Hydroxy-4,4',6'-trimethoxychalcone"", '2,3,9-Trimethoxypterocarpan', '5,8-Dimethoxychalepensin', 'beta,2-Dihydroxy-4,6-dimethoxy-3-methylchalcone', ""2'-Hydroxyenterolactone"", '2-Hydroxyenterolactone', ""4'-Hydroxyenterolactone"", '4-Hydroxyenterolactone', '5-Hydroxyentero…	C15H22O6;C18H18O5	HMDB36159;HMDB37560;HMDB30567;HMDB32806;HMDB33586;HMDB33787;HMDB37086;HMDB40936;HMDB41645;HMDB41650;HMDB41672;HMDB41682;HMDB41694;HMDB41697;HMDB41700;HMDB41703
1921	Silver	Polar metabolomics	Ag MP 06h	338.806	0.705	0.0278
1922	Silver	Polar metabolomics	Ag MP 06h	340.803	0.703	0.0278
1923	Silver	Polar metabolomics	Ag MP 06h	342.8	0.696	0.0357
1924	Silver	Polar metabolomics	Ag MP 06h	342.848	0.716	0.0191
1925	Silver	Polar metabolomics	Ag MP 06h	344.845	0.695	0.00993
1926	Silver	Polar metabolomics	Ag MP 06h	347.05	1.272	0.0495	['gamma-Glutamyl-S-(1-propenyl)cysteine sulfoxide'];['2,3-Dihydro-2,3-dihydroxy-4-(4-hydroxyphenyl)-1H-phenalen-1-one', 'Musanolone C', 'Dehydrowarfarin']	C11H18N2O6S;C19H14O4	HMDB31870;HMDB32848;HMDB37111;HMDB60575
1927	Silver	Polar metabolomics	Ag MP 06h	348.835	0.765	0.00993
1928	Silver	Polar metabolomics	Ag MP 06h	350.832	0.731	0.00919
1929	Silver	Polar metabolomics	Ag MP 06h	352.829	0.715	0.0177
1930	Silver	Polar metabolomics	Ag MP 06h	352.877	0.737	0.012
1931	Silver	Polar metabolomics	Ag MP 06h	354.779	0.79	0.0494
1932	Silver	Polar metabolomics	Ag MP 06h	356.274	2.554	0.0456
1933	Silver	Polar metabolomics	Ag MP 06h	356.777	0.77	0.0415
1934	Silver	Polar metabolomics	Ag MP 06h	358.774	0.799	0.0495
1935	Silver	Polar metabolomics	Ag MP 06h	358.821	0.769	0.0147
1936	Silver	Polar metabolomics	Ag MP 06h	360.788	0.737	0.0191
1937	Silver	Polar metabolomics	Ag MP 06h	360.818	0.779	0.0151
1938	Silver	Polar metabolomics	Ag MP 06h	364.829	0.727	0.0151
1939	Silver	Polar metabolomics	Ag MP 06h	371.238	2.77	0.0428	['MG(0:0/16:0/0:0)', 'MG(16:0/0:0/0:0)', 'Glycerol 1-hexadecanoate']	C19H38O4	HMDB11533;HMDB11564;HMDB31074	LMGL01010025;LMGL01010009;
1940	Silver	Polar metabolomics	Ag MP 06h	373.029	0.389	0.044
1941	Silver	Polar metabolomics	Ag MP 06h	378.824	0.683	0.0162
1942	Silver	Polar metabolomics	Ag MP 06h	380.822	0.67	0.0151
1943	Silver	Polar metabolomics	Ag MP 06h	390.798	0.747	0.0456
1944	Silver	Polar metabolomics	Ag MP 06h	392.796	0.743	0.0495
1945	Silver	Polar metabolomics	Ag MP 06h	394.798	0.758	0.0357
1946	Silver	Polar metabolomics	Ag MP 06h	396.764	0.688	0.0446
1947	Silver	Polar metabolomics	Ag MP 06h	398.761	0.674	0.0428
1948	Silver	Polar metabolomics	Ag MP 06h	399.144	2.024	0.0397	['Dulxanthone E', ""5'-Methoxycurcumin""]	C22H22O7	HMDB34030;HMDB38921
1949	Silver	Polar metabolomics	Ag MP 06h	400.273	2.037	0.0456
1950	Silver	Polar metabolomics	Ag MP 06h	400.759	0.699	0.0397
1951	Silver	Polar metabolomics	Ag MP 06h	400.806	0.7	0.0186
1952	Silver	Polar metabolomics	Ag MP 06h	402.803	0.669	0.0151
1953	Silver	Polar metabolomics	Ag MP 06h	404.8	0.607	0.0289
1954	Silver	Polar metabolomics	Ag MP 06h	406.793	0.757	0.0456
1955	Silver	Polar metabolomics	Ag MP 06h	408.79	0.739	0.0456
1956	Silver	Polar metabolomics	Ag MP 06h	418.777	0.743	0.0367
1957	Silver	Polar metabolomics	Ag MP 06h	422.788	0.71	0.0343
1958	Silver	Polar metabolomics	Ag MP 06h	424.785	0.723	0.0226
1959	Silver	Polar metabolomics	Ag MP 06h	436.783	0.724	0.044
1960	Silver	Polar metabolomics	Ag MP 06h	438.78	0.708	0.0343
1961	Silver	Polar metabolomics	Ag MP 06h	441.728	0.758	0.0302
1962	Silver	Polar metabolomics	Ag MP 06h	448.723	0.415	0.044
1963	Silver	Polar metabolomics	Ag MP 06h	451.291	1.601	0.0479
1964	Silver	Polar metabolomics	Ag MP 06h	453.924	0.666	0.0352
1965	Silver	Polar metabolomics	Ag MP 06h	456.799	0.783	0.0204
1966	Silver	Polar metabolomics	Ag MP 06h	458.765	0.686	0.0456
1967	Silver	Polar metabolomics	Ag MP 06h	462.759	0.701	0.0322
1968	Silver	Polar metabolomics	Ag MP 06h	462.807	0.678	0.0301
1969	Silver	Polar metabolomics	Ag MP 06h	465.259	1.821	0.0377
1970	Silver	Polar metabolomics	Ag MP 06h	466.263	1.824	0.0397
1971	Silver	Polar metabolomics	Ag MP 06h	467.257	1.825	0.046
1972	Silver	Polar metabolomics	Ag MP 06h	468.746	0.717	0.0495
1973	Silver	Polar metabolomics	Ag MP 06h	477.07	1.558	0.0204	['Silica aerogel']	C23H22N2O3S2	HMDB32503
1974	Silver	Polar metabolomics	Ag MP 06h	480.699	0.638	0.0397
1975	Silver	Polar metabolomics	Ag MP 06h	484.741	0.725	0.0457
1976	Silver	Polar metabolomics	Ag MP 06h	485.157	2.268	0.0479	['Estrone glucuronide', 'Cubebininolide', ""5'-O-Methylmelledonal""]	C24H30O8	HMDB04483;HMDB32728;HMDB35859	LMST05010011;
1977	Silver	Polar metabolomics	Ag MP 06h	489.241	2.354	0.0479	['Celastrol']	C29H38O4	HMDB02385
1978	Silver	Polar metabolomics	Ag MP 06h	493.311	1.82	0.0346	['5b-Cholestane-3a,7a,12a,23S,25-pentol', '5b-Cholestane-3a,7a,12a,23R,25-pentol', '5b-Cholestane-3a,7a,12a,24,25-pentol', '5a-Cholestane-3a,7a,12a,23,25-pentol', '5b-Cholestane-3a,7a,12a,25,26-pentol', 'Cholestane-3,7,12,24,25-pentol']	C27H48O5	HMDB00483;HMDB00513;HMDB00556;HMDB00558;HMDB02180;HMDB02208	LMST01010240;LMST04030016;
1979	Silver	Polar metabolomics	Ag MP 06h	500.715	0.781	0.0349
1980	Silver	Polar metabolomics	Ag MP 06h	503.136	2.95	0.0499
1981	Silver	Polar metabolomics	Ag MP 06h	505.263	2.195	0.0456
1982	Silver	Polar metabolomics	Ag MP 06h	515.392	2.099	0.0456
1983	Silver	Polar metabolomics	Ag MP 06h	520.765	0.669	0.0357
1984	Silver	Polar metabolomics	Ag MP 06h	521.034	1.524	0.0484
1985	Silver	Polar metabolomics	Ag MP 06h	521.381	2.132	0.0455
1986	Silver	Polar metabolomics	Ag MP 06h	587.924	0.71	0.0186
1987	Silver	Polar metabolomics	Ag MP 06h	602.929	0.728	0.0162	['Pentosan Polysulfate']	C10H18O21S4	HMDB14824
1988	Silver	Polar metabolomics	Ag MP 06h	606.632	0.573	0.0278
1989	Silver	Polar metabolomics	Ag MP 06h	608.67	0.505	0.00919
1990	Silver	Polar metabolomics	Ag MP 06h	80.9479	0.719	0.0296
1991	Silver	Polar metabolomics	Ag MP 06h	82.9449	0.71	0.0314
[truncated: 48,457 more rows]
