# Supplementary material for: Multi-omics approaches confirm metal ions mediate the main toxicological pathways of metal-bearing nanoparticles in lung epithelial A549 cells
Source: Royal Society of Chemistry journal article supplement (doi:10.1039/c8en00071a), 2018-01-01
Supplement: c8en00071a6.xlsx [file c8en00071a6.xlsx]

## Sheet: Sheet1
ESI 6: IMPaLA pathway analysis of omics data
Results of IMPaLA biological pathway over-representation analyses
IMPaLA was conducted using all significantly induced (q<0.05) and all significantly repressed (q<0.05) gene and metabolite identifiers for each exposure group when compared with its time-matched control group.
Direction denotes increase (Up) or decrease (Down) of the input molecules with respect to the time-matched controls
Pathway terms over-represented among increasing molecules are shown in red text
Pathway terms over-represented among decreasing molecules are shown in green text
Supplementary material of:
Susan Dekkers*1, Tim D. Williams*2, Jinkang Zhang2, Jiarui (Albert) Zhou3, Rob J. Vandebriel1, Liset J.J. De La Fonteyne1, Eric R. Gremmer1, Shan He3, Emily J. Guggenheim4, Iseult Lynch4, Flemming R. Cassee1,5, Wim H. De Jong1, Mark R. Viant2
Multi-omics approaches confirm metal ions mediate the main toxicological pathways of metal-bearing nanoparticles in lung epithelial A549 cells.
Environmental Science Nano. Corresponding author: susan.dekkers@rivm.nl.
No	Experiment	Exposure group	Direction of change	pathway_name	pathway_source	num_overlapping_genes	overlapping_genes	num_all_pathway_genes	P_genes	Q_genes	num_overlapping_metabolites	overlapping_metabolites	num_all_pathway_metabolites	P_metabolites	Q_metabolites	P_joint	Q_joint
1	Ceria	CeO2 NP-A 01h	Up	none statistically significant at q<0.05
2	Ceria	CeO2 NP-A 01h	Down	none statistically significant at q<0.05
3	Ceria	CeO2 NP-A 06h	Up	none statistically significant at q<0.05
4	Ceria	CeO2 NP-A 06h	Down	ID signaling pathway	Wikipathways	3	ENSG00000125968;ENSG00000115738;ENSG00000117318	15 (16)	2.55e-09	1.1e-05
5	Ceria	CeO2 NP-A 06h	Down	ID	NetPath	3	ENSG00000125968;ENSG00000115738;ENSG00000117318	25 (26)	1.29e-08	2.78e-05
6	Ceria	CeO2 NP-A 06h	Down	TGF-beta signaling pathway - Homo sapiens (human)	KEGG	3	ENSG00000125968;ENSG00000115738;ENSG00000117318	81 (84)	4.77e-07	0.000618
7	Ceria	CeO2 NP-A 06h	Down	miR-517 relationship with ARCN1 and USP1	Wikipathways	2	ENSG00000125968;ENSG00000115738	5 (5)	5.73e-07	0.000618
8	Ceria	CeO2 NP-A 06h	Down	Signaling pathways regulating pluripotency of stem cells - Homo sapiens (human)	KEGG	3	ENSG00000125968;ENSG00000115738;ENSG00000117318	129 (142)	1.96e-06	0.00169
9	Ceria	CeO2 NP-A 24h	Up	none statistically significant at q<0.05
10	Ceria	CeO2 NP-A 24h	Down	miR-517 relationship with ARCN1 and USP1	Wikipathways	2	ENSG00000125968;ENSG00000115738	5 (5)	1.91e-07	0.000825
11	Ceria	CeO2 NP-A 24h	Down	ID signaling pathway	Wikipathways	2	ENSG00000125968;ENSG00000115738	15 (16)	2e-06	0.00433
12	Ceria	CeO2 NP-A 24h	Down	ID	NetPath	2	ENSG00000125968;ENSG00000115738	25 (26)	5.73e-06	0.00825
13	Ceria	CeO2 NP-C 01h	Up	none statistically significant at q<0.05
14	Ceria	CeO2 NP-C 01h	Down	none statistically significant at q<0.05
15	Ceria	CeO2 NP-C 06h	Up	none statistically significant at q<0.05
16	Ceria	CeO2 NP-C 06h	Down	ID	NetPath	4	ENSG00000172201;ENSG00000125968;ENSG00000115738;ENSG00000117318	25 (26)	2.77e-11	1.2e-07
17	Ceria	CeO2 NP-C 06h	Down	TGF-beta signaling pathway - Homo sapiens (human)	KEGG	4	ENSG00000172201;ENSG00000125968;ENSG00000115738;ENSG00000117318	81 (84)	3.64e-09	7.86e-06
18	Ceria	CeO2 NP-C 06h	Down	ID signaling pathway	Wikipathways	3	ENSG00000125968;ENSG00000115738;ENSG00000117318	15 (16)	1.02e-08	1.47e-05
19	Ceria	CeO2 NP-C 06h	Down	Signaling pathways regulating pluripotency of stem cells - Homo sapiens (human)	KEGG	4	ENSG00000172201;ENSG00000125968;ENSG00000115738;ENSG00000117318	129 (142)	2.41e-08	2.6e-05
20	Ceria	CeO2 NP-C 06h	Down	miR-517 relationship with ARCN1 and USP1	Wikipathways	2	ENSG00000125968;ENSG00000115738	5 (5)	1.14e-06	0.000989
21	Ceria	CeO2 NP-C 24h	Up	none statistically significant at q<0.05
22	Ceria	CeO2 NP-C 24h	Down	ID	NetPath	4	ENSG00000172201;ENSG00000125968;ENSG00000115738;ENSG00000117318	25 (26)	2.77e-11	1.2e-07
23	Ceria	CeO2 NP-C 24h	Down	TGF-beta signaling pathway - Homo sapiens (human)	KEGG	4	ENSG00000172201;ENSG00000125968;ENSG00000115738;ENSG00000117318	81 (84)	3.64e-09	7.86e-06
24	Ceria	CeO2 NP-C 24h	Down	ID signaling pathway	Wikipathways	3	ENSG00000125968;ENSG00000115738;ENSG00000117318	15 (16)	1.02e-08	1.47e-05
25	Ceria	CeO2 NP-C 24h	Down	Signaling pathways regulating pluripotency of stem cells - Homo sapiens (human)	KEGG	4	ENSG00000172201;ENSG00000125968;ENSG00000115738;ENSG00000117318	129 (142)	2.41e-08	2.6e-05
26	Ceria	CeO2 NP-C 24h	Down	miR-517 relationship with ARCN1 and USP1	Wikipathways	2	ENSG00000125968;ENSG00000115738	5 (5)	1.14e-06	0.000989
27	Ceria	CeO2 NP-E 01h	Up	none statistically significant at q<0.05
28	Ceria	CeO2 NP-E 01h	Down	none statistically significant at q<0.05
29	Ceria	CeO2 NP-E 06h	Up	none statistically significant at q<0.05
30	Ceria	CeO2 NP-E 06h	Down	none statistically significant at q<0.05
31	Ceria	CeO2 NP-E 24h	Up	none statistically significant at q<0.05
32	Ceria	CeO2 NP-E 24h	Down	ID	NetPath	4	ENSG00000172201;ENSG00000125968;ENSG00000115738;ENSG00000117318	25 (26)	2.77e-11	1.2e-07
33	Ceria	CeO2 NP-E 24h	Down	TGF-beta signaling pathway - Homo sapiens (human)	KEGG	4	ENSG00000172201;ENSG00000125968;ENSG00000115738;ENSG00000117318	81 (84)	3.64e-09	7.86e-06
34	Ceria	CeO2 NP-E 24h	Down	ID signaling pathway	Wikipathways	3	ENSG00000125968;ENSG00000115738;ENSG00000117318	15 (16)	1.02e-08	1.47e-05
35	Ceria	CeO2 NP-E 24h	Down	Signaling pathways regulating pluripotency of stem cells - Homo sapiens (human)	KEGG	4	ENSG00000172201;ENSG00000125968;ENSG00000115738;ENSG00000117318	129 (142)	2.41e-08	2.6e-05
36	Ceria	CeO2 NP-E 24h	Down	miR-517 relationship with ARCN1 and USP1	Wikipathways	2	ENSG00000125968;ENSG00000115738	5 (5)	1.14e-06	0.000989
37	Ceria	CeO2 NP-NM212 01h	Up	none statistically significant at q<0.05
38	Ceria	CeO2 NP-NM212 01h	Down	none statistically significant at q<0.05
39	Ceria	CeO2 NP-NM212 06h	Up	none statistically significant at q<0.05
40	Ceria	CeO2 NP-NM212 06h	Down	none statistically significant at q<0.05
41	Ceria	CeO2 NP-NM212 24h	Up	Photodynamic therapy-induced HIF-1 survival signaling	Wikipathways	4	ENSG00000104765;ENSG00000146678;ENSG00000146674;ENSG00000073756	35 (36)	1.9e-06	0.00821
42	Ceria	CeO2 NP-NM212 24h	Up	HIF-1-alpha transcription factor network	PID	4	ENSG00000047457;ENSG00000147872;ENSG00000146678;ENSG00000104419	62 (67)	1.93e-05	0.0417
43	Ceria	CeO2 NP-NM212 24h	Down	none statistically significant at q<0.05
44	Silver	Ag NP-NM300K 01h	Up	Roxithromycin Action Pathway	SMPDB	0		0 (0)	1	1	9	HMDB00162;HMDB00696;HMDB00167;HMDB00168;HMDB00883;HMDB03406;HMDB00172;HMDB00687;HMDB13773;HMDB00177	10 (20)	8.98e-08	1.19e-05	8.98e-08	1.19e-05
45	Silver	Ag NP-NM300K 01h	Up	Josamycin Action Pathway	SMPDB	0		0 (0)	1	1	9	HMDB00162;HMDB00696;HMDB00167;HMDB00168;HMDB00883;HMDB03406;HMDB00172;HMDB00687;HMDB13773;HMDB00177	10 (20)	8.98e-08	1.19e-05	8.98e-08	1.19e-05
46	Silver	Ag NP-NM300K 01h	Up	Tigecycline Action Pathway	SMPDB	0		0 (0)	1	1	9	HMDB00162;HMDB00696;HMDB00167;HMDB00168;HMDB00883;HMDB03406;HMDB00172;HMDB00687;HMDB13773;HMDB00177	10 (20)	8.98e-08	1.19e-05	8.98e-08	1.19e-05
47	Silver	Ag NP-NM300K 01h	Up	Arbekacin Action Pathway	SMPDB	0		0 (0)	1	1	9	HMDB00162;HMDB00696;HMDB00167;HMDB00168;HMDB00883;HMDB03406;HMDB00172;HMDB00687;HMDB13773;HMDB00177	10 (20)	8.98e-08	1.19e-05	8.98e-08	1.19e-05
48	Silver	Ag NP-NM300K 01h	Up	Paromomycin Action Pathway	SMPDB	0		0 (0)	1	1	9	HMDB00162;HMDB00696;HMDB00167;HMDB00168;HMDB00883;HMDB03406;HMDB00172;HMDB00687;HMDB13773;HMDB00177	10 (20)	8.98e-08	1.19e-05	8.98e-08	1.19e-05
49	Silver	Ag NP-NM300K 01h	Up	Oxytetracycline Action Pathway	SMPDB	0		0 (0)	1	1	9	HMDB00162;HMDB00696;HMDB00167;HMDB00168;HMDB00883;HMDB03406;HMDB00172;HMDB00687;HMDB13773;HMDB00177	10 (20)	8.98e-08	1.19e-05	8.98e-08	1.19e-05
50	Silver	Ag NP-NM300K 01h	Up	Clomocycline Action Pathway	SMPDB	0		0 (0)	1	1	9	HMDB00162;HMDB00696;HMDB00167;HMDB00168;HMDB00883;HMDB03406;HMDB00172;HMDB00687;HMDB13773;HMDB00177	10 (20)	8.98e-08	1.19e-05	8.98e-08	1.19e-05
51	Silver	Ag NP-NM300K 01h	Up	Demeclocycline Action Pathway	SMPDB	0		0 (0)	1	1	9	HMDB00162;HMDB00696;HMDB00167;HMDB00168;HMDB00883;HMDB03406;HMDB00172;HMDB00687;HMDB13773;HMDB00177	10 (20)	8.98e-08	1.19e-05	8.98e-08	1.19e-05
52	Silver	Ag NP-NM300K 01h	Up	Methacycline Action Pathway	SMPDB	0		0 (0)	1	1	9	HMDB00162;HMDB00696;HMDB00167;HMDB00168;HMDB00883;HMDB03406;HMDB00172;HMDB00687;HMDB13773;HMDB00177	10 (20)	8.98e-08	1.19e-05	8.98e-08	1.19e-05
53	Silver	Ag NP-NM300K 01h	Up	Rolitetracycline Action Pathway	SMPDB	0		0 (0)	1	1	9	HMDB00162;HMDB00696;HMDB00167;HMDB00168;HMDB00883;HMDB03406;HMDB00172;HMDB00687;HMDB13773;HMDB00177	10 (20)	8.98e-08	1.19e-05	8.98e-08	1.19e-05
54	Silver	Ag NP-NM300K 01h	Up	Spectinomycin Action Pathway	SMPDB	0		0 (0)	1	1	9	HMDB00162;HMDB00696;HMDB00167;HMDB00168;HMDB00883;HMDB03406;HMDB00172;HMDB00687;HMDB13773;HMDB00177	10 (20)	8.98e-08	1.19e-05	8.98e-08	1.19e-05
55	Silver	Ag NP-NM300K 01h	Up	Kanamycin Action Pathway	SMPDB	0		0 (0)	1	1	9	HMDB00162;HMDB00696;HMDB00167;HMDB00168;HMDB00883;HMDB03406;HMDB00172;HMDB00687;HMDB13773;HMDB00177	10 (20)	8.98e-08	1.19e-05	8.98e-08	1.19e-05
56	Silver	Ag NP-NM300K 01h	Up	Gentamicin Action Pathway	SMPDB	0		0 (0)	1	1	9	HMDB00162;HMDB00696;HMDB00167;HMDB00168;HMDB00883;HMDB03406;HMDB00172;HMDB00687;HMDB13773;HMDB00177	10 (20)	8.98e-08	1.19e-05	8.98e-08	1.19e-05
57	Silver	Ag NP-NM300K 01h	Up	Netilmicin Action Pathway	SMPDB	0		0 (0)	1	1	9	HMDB00162;HMDB00696;HMDB00167;HMDB00168;HMDB00883;HMDB03406;HMDB00172;HMDB00687;HMDB13773;HMDB00177	10 (20)	8.98e-08	1.19e-05	8.98e-08	1.19e-05
58	Silver	Ag NP-NM300K 01h	Up	Neomycin Action Pathway	SMPDB	0		0 (0)	1	1	9	HMDB00162;HMDB00696;HMDB00167;HMDB00168;HMDB00883;HMDB03406;HMDB00172;HMDB00687;HMDB13773;HMDB00177	10 (20)	8.98e-08	1.19e-05	8.98e-08	1.19e-05
59	Silver	Ag NP-NM300K 01h	Up	Erythromycin Action Pathway	SMPDB	0		0 (0)	1	1	9	HMDB00162;HMDB00696;HMDB00167;HMDB00168;HMDB00883;HMDB03406;HMDB00172;HMDB00687;HMDB13773;HMDB00177	10 (20)	8.98e-08	1.19e-05	8.98e-08	1.19e-05
60	Silver	Ag NP-NM300K 01h	Up	Amikacin Action Pathway	SMPDB	0		0 (0)	1	1	9	HMDB00162;HMDB00696;HMDB00167;HMDB00168;HMDB00883;HMDB03406;HMDB00172;HMDB00687;HMDB13773;HMDB00177	10 (20)	8.98e-08	1.19e-05	8.98e-08	1.19e-05
61	Silver	Ag NP-NM300K 01h	Up	Telithromycin Action Pathway	SMPDB	0		0 (0)	1	1	9	HMDB00162;HMDB00696;HMDB00167;HMDB00168;HMDB00883;HMDB03406;HMDB00172;HMDB00687;HMDB13773;HMDB00177	10 (20)	8.98e-08	1.19e-05	8.98e-08	1.19e-05
62	Silver	Ag NP-NM300K 01h	Up	Lymecycline Action Pathway	SMPDB	0		0 (0)	1	1	9	HMDB00162;HMDB00696;HMDB00167;HMDB00168;HMDB00883;HMDB03406;HMDB00172;HMDB00687;HMDB13773;HMDB00177	10 (20)	8.98e-08	1.19e-05	8.98e-08	1.19e-05
63	Silver	Ag NP-NM300K 01h	Up	Chloramphenicol Action Pathway	SMPDB	0		0 (0)	1	1	9	HMDB00162;HMDB00696;HMDB00167;HMDB00168;HMDB00883;HMDB03406;HMDB00172;HMDB00687;HMDB13773;HMDB00177	10 (20)	8.98e-08	1.19e-05	8.98e-08	1.19e-05
64	Silver	Ag NP-NM300K 01h	Up	Azithromycin Action Pathway	SMPDB	0		0 (0)	1	1	9	HMDB00162;HMDB00696;HMDB00167;HMDB00168;HMDB00883;HMDB03406;HMDB00172;HMDB00687;HMDB13773;HMDB00177	10 (20)	8.98e-08	1.19e-05	8.98e-08	1.19e-05
65	Silver	Ag NP-NM300K 01h	Up	Troleandomycin Action Pathway	SMPDB	0		0 (0)	1	1	9	HMDB00162;HMDB00696;HMDB00167;HMDB00168;HMDB00883;HMDB03406;HMDB00172;HMDB00687;HMDB13773;HMDB00177	10 (20)	8.98e-08	1.19e-05	8.98e-08	1.19e-05
66	Silver	Ag NP-NM300K 01h	Up	Clindamycin Action Pathway	SMPDB	0		0 (0)	1	1	9	HMDB00162;HMDB00696;HMDB00167;HMDB00168;HMDB00883;HMDB03406;HMDB00172;HMDB00687;HMDB13773;HMDB00177	10 (20)	8.98e-08	1.19e-05	8.98e-08	1.19e-05
67	Silver	Ag NP-NM300K 01h	Up	Streptomycin Action Pathway	SMPDB	0		0 (0)	1	1	9	HMDB00162;HMDB00696;HMDB00167;HMDB00168;HMDB00883;HMDB03406;HMDB00172;HMDB00687;HMDB13773;HMDB00177	10 (20)	8.98e-08	1.19e-05	8.98e-08	1.19e-05
68	Silver	Ag NP-NM300K 01h	Up	Clarithromycin Action Pathway	SMPDB	0		0 (0)	1	1	9	HMDB00162;HMDB00696;HMDB00167;HMDB00168;HMDB00883;HMDB03406;HMDB00172;HMDB00687;HMDB13773;HMDB00177	10 (20)	8.98e-08	1.19e-05	8.98e-08	1.19e-05
69	Silver	Ag NP-NM300K 01h	Up	Tobramycin Action Pathway	SMPDB	0		0 (0)	1	1	9	HMDB00162;HMDB00696;HMDB00167;HMDB00168;HMDB00883;HMDB03406;HMDB00172;HMDB00687;HMDB13773;HMDB00177	10 (20)	8.98e-08	1.19e-05	8.98e-08	1.19e-05
70	Silver	Ag NP-NM300K 01h	Up	Lincomycin Action Pathway	SMPDB	0		0 (0)	1	1	9	HMDB00162;HMDB00696;HMDB00167;HMDB00168;HMDB00883;HMDB03406;HMDB00172;HMDB00687;HMDB13773;HMDB00177	10 (20)	8.98e-08	1.19e-05	8.98e-08	1.19e-05
71	Silver	Ag NP-NM300K 01h	Up	Minocycline Action Pathway	SMPDB	0		0 (0)	1	1	9	HMDB00162;HMDB00696;HMDB00167;HMDB00168;HMDB00883;HMDB03406;HMDB00172;HMDB00687;HMDB13773;HMDB00177	10 (20)	8.98e-08	1.19e-05	8.98e-08	1.19e-05
72	Silver	Ag NP-NM300K 01h	Up	Class I MHC mediated antigen processing & presentation	Wikipathways	0		0 (0)	1	1	13	HMDB00187;HMDB00162;HMDB00696;HMDB00167;HMDB00168;HMDB00883;HMDB00172;HMDB00159;HMDB00929;HMDB00158;HMDB00148;HMDB00687;HMDB13773;HMDB00177	21 (35)	1.61e-07	2e-05	1.61e-07	2e-05
73	Silver	Ag NP-NM300K 01h	Up	tRNA Aminoacylation	Wikipathways	0		0 (0)	1	1	13	HMDB00187;HMDB00162;HMDB00696;HMDB00167;HMDB00168;HMDB00883;HMDB00172;HMDB00159;HMDB00929;HMDB00158;HMDB00148;HMDB00687;HMDB13773;HMDB00177	21 (26)	1.61e-07	2e-05	1.61e-07	2e-05
74	Silver	Ag NP-NM300K 01h	Up	Tetracycline Action Pathway	SMPDB	0		0 (0)	1	1	9	HMDB00162;HMDB00696;HMDB00167;HMDB00168;HMDB00883;HMDB03406;HMDB00172;HMDB00687;HMDB13773;HMDB00177	11 (20)	4.4e-07	5.02e-05	4.4e-07	5.02e-05
75	Silver	Ag NP-NM300K 01h	Up	Doxycycline Action Pathway	SMPDB	0		0 (0)	1	1	9	HMDB00162;HMDB00696;HMDB00167;HMDB00168;HMDB00883;HMDB03406;HMDB00172;HMDB00687;HMDB13773;HMDB00177	11 (20)	4.4e-07	5.02e-05	4.4e-07	5.02e-05
76	Silver	Ag NP-NM300K 01h	Up	Amino Acid interconversion	Wikipathways	0		0 (0)	1	1	16	HMDB00187;HMDB00162;HMDB00696;HMDB00719;HMDB00167;HMDB00725;HMDB00168;HMDB00883;HMDB00172;HMDB00159;HMDB00929;HMDB00001;HMDB00479;HMDB00158;HMDB00148;HMDB00687;HMDB13773;HMDB00177	36 (51)	2.21e-06	0.000226	2.21e-06	0.000226
77	Silver	Ag NP-NM300K 01h	Up	Transport of inorganic cations-anions and amino acids-oligopeptides	Wikipathways	0		0 (0)	1	1	16	HMDB00187;HMDB00162;HMDB00696;HMDB00167;HMDB03406;HMDB00168;HMDB00883;HMDB00172;HMDB00159;HMDB00929;HMDB06055;HMDB00158;HMDB00148;HMDB00043;HMDB00687;HMDB13773;HMDB00177	37 (51)	3.49e-06	0.00034	3.49e-06	0.00034
78	Silver	Ag NP-NM300K 01h	Up	leukotriene biosynthesis	HumanCyc	0		1 (5)	1	1	14	HMDB00187;HMDB00172;HMDB00696;HMDB00167;HMDB00168;HMDB00883;HMDB00148;HMDB00159;HMDB00929;HMDB00162;HMDB00158;HMDB00125;HMDB00687;HMDB13773;HMDB00177	22 (30)	2.88e-08	1.19e-05	5.29e-07	0.000404
79	Silver	Ag NP-NM300K 01h	Up	tRNA charging	HumanCyc	0		38 (41)	1	1	13	HMDB00187;HMDB00172;HMDB00696;HMDB00167;HMDB00168;HMDB00883;HMDB00148;HMDB00159;HMDB00929;HMDB00162;HMDB00158;HMDB00687;HMDB13773;HMDB00177	20 (24)	6.84e-08	1.19e-05	1.2e-06	0.000457
80	Silver	Ag NP-NM300K 01h	Up	Aminoacyl-tRNA biosynthesis - Homo sapiens (human)	KEGG	0		46 (66)	1	1	13	HMDB00187;HMDB00162;HMDB00696;HMDB00167;HMDB00168;HMDB00883;HMDB00172;HMDB00159;HMDB00929;HMDB00158;HMDB00148;HMDB00687;HMDB13773;HMDB00177	22 (52)	3.51e-07	4.24e-05	5.57e-06	0.00142
81	Silver	Ag NP-NM300K 01h	Up	<i>S</i>-methyl-5-thio-&alpha;-D-ribose 1-phosphate degradation	HumanCyc	0		4 (4)	1	1	13	HMDB00187;HMDB00172;HMDB00696;HMDB00167;HMDB00168;HMDB00883;HMDB00148;HMDB00159;HMDB00929;HMDB00162;HMDB00158;HMDB00687;HMDB13773;HMDB00177	23 (35)	7.22e-07	7.99e-05	1.09e-05	0.00209
82	Silver	Ag NP-NM300K 01h	Up	Transport of glucose and other sugars_ bile salts and organic acids_ metal ions and amine compounds	Wikipathways	0		0 (0)	1	1	14	HMDB00187;HMDB00162;HMDB00696;HMDB00167;HMDB00168;HMDB00883;HMDB00172;HMDB00159;HMDB00929;HMDB06055;HMDB00158;HMDB00043;HMDB00687;HMDB13773;HMDB00177	34 (83)	3.28e-05	0.00262	3.28e-05	0.00262
83	Silver	Ag NP-NM300K 01h	Up	Amino acid transport across the plasma membrane	Reactome	0		17 (31)	1	1	13	HMDB00162;HMDB00172;HMDB00168;HMDB00883;HMDB03406;HMDB00159;HMDB00929;HMDB06055;HMDB00158;HMDB00148;HMDB00043;HMDB00687;HMDB13773;HMDB00177	24 (32)	1.41e-06	0.000152	2.04e-05	0.00311
84	Silver	Ag NP-NM300K 01h	Up	Mineral absorption - Homo sapiens (human)	KEGG	0		33 (52)	1	1	10	HMDB00187;HMDB00162;HMDB00696;HMDB00167;HMDB00168;HMDB00883;HMDB00172;HMDB00159;HMDB00929;HMDB00687;HMDB13773	15 (29)	2.06e-06	0.000216	2.9e-05	0.00369
85	Silver	Ag NP-NM300K 01h	Up	&gamma;-glutamyl cycle	HumanCyc	0		6 (6)	1	1	14	HMDB00187;HMDB00172;HMDB00696;HMDB00167;HMDB00168;HMDB00883;HMDB00148;HMDB00159;HMDB00929;HMDB00162;HMDB00158;HMDB00125;HMDB00687;HMDB13773;HMDB00177	29 (48)	3.21e-06	0.00032	4.38e-05	0.00478
86	Silver	Ag NP-NM300K 01h	Up	Phase II conjugation	Wikipathways	0		0 (0)	1	1	14	HMDB00187;HMDB00162;HMDB00696;HMDB00167;HMDB00168;HMDB00883;HMDB00172;HMDB00159;HMDB00929;HMDB00158;HMDB00148;HMDB00125;HMDB00687;HMDB13773;HMDB00177	37 (164)	0.000103	0.00731	0.000103	0.00731
87	Silver	Ag NP-NM300K 01h	Up	Na+/Cl- dependent neurotransmitter transporters	Reactome	0		4 (19)	1	1	11	HMDB00162;HMDB00168;HMDB00883;HMDB00172;HMDB00159;HMDB00929;HMDB06055;HMDB00158;HMDB00043;HMDB00687;HMDB13773;HMDB00177	20 (31)	8.68e-06	0.000813	0.00011	0.00924
88	Silver	Ag NP-NM300K 01h	Up	Protein digestion and absorption - Homo sapiens (human)	KEGG	0		36 (90)	1	1	14	HMDB00187;HMDB00162;HMDB00696;HMDB00167;HMDB00168;HMDB00883;HMDB00172;HMDB00159;HMDB00929;HMDB34301;HMDB00148;HMDB00158;HMDB00687;HMDB13773;HMDB00177	31 (47)	8.76e-06	0.000813	0.000111	0.00924
89	Silver	Ag NP-NM300K 01h	Up	Tryptophan catabolism	Reactome	0		8 (13)	1	1	8	HMDB00172;HMDB00883;HMDB00148;HMDB00159;HMDB00929;HMDB00158;HMDB00687;HMDB13773;HMDB00177	11 (34)	9.63e-06	0.000873	0.000121	0.00924
90	Silver	Ag NP-NM300K 01h	Up	Amine compound SLC transporters	Reactome	0		8 (30)	1	1	11	HMDB00162;HMDB00168;HMDB00883;HMDB00172;HMDB00159;HMDB00929;HMDB06055;HMDB00158;HMDB00043;HMDB00687;HMDB13773;HMDB00177	21 (35)	1.63e-05	0.00144	0.000196	0.0127
91	Silver	Ag NP-NM300K 01h	Up	mRNA_ protein_ and metabolite inducation pathway by cyclosporin A	Wikipathways	0		6 (6)	1	1	7	HMDB00167;HMDB00168;HMDB00883;HMDB00172;HMDB00929;HMDB00158;HMDB00687;HMDB13773	9 (9)	1.9e-05	0.00165	0.000226	0.0127
92	Silver	Ag NP-NM300K 01h	Up	Cytosolic tRNA aminoacylation	Reactome	0		24 (26)	1	1	10	HMDB00162;HMDB00172;HMDB00168;HMDB00883;HMDB00148;HMDB00159;HMDB00929;HMDB00158;HMDB00687;HMDB13773;HMDB00177	18 (66)	2.12e-05	0.00173	0.00025	0.0127
93	Silver	Ag NP-NM300K 01h	Up	Mitochondrial tRNA aminoacylation	Reactome	0		21 (23)	1	1	10	HMDB00162;HMDB00172;HMDB00168;HMDB00883;HMDB00148;HMDB00159;HMDB00929;HMDB00158;HMDB00687;HMDB13773;HMDB00177	18 (66)	2.12e-05	0.00173	0.00025	0.0127
94	Silver	Ag NP-NM300K 01h	Up	tRNA Aminoacylation	Reactome	0		42 (45)	1	1	10	HMDB00162;HMDB00172;HMDB00168;HMDB00883;HMDB00148;HMDB00159;HMDB00929;HMDB00158;HMDB00687;HMDB13773;HMDB00177	18 (66)	2.12e-05	0.00173	0.00025	0.0127
95	Silver	Ag NP-NM300K 01h	Up	Histidine_ lysine_ phenylalanine_ tyrosine_ proline and tryptophan catabolism	Reactome	0		29 (45)	1	1	13	HMDB00162;HMDB02104;HMDB01372;HMDB00172;HMDB00883;HMDB00148;HMDB00159;HMDB00929;HMDB00158;HMDB00125;HMDB00734;HMDB00687;HMDB13773;HMDB00177	30 (90)	3.43e-05	0.00268	0.000387	0.0185
96	Silver	Ag NP-NM300K 01h	Up	Amino Acid metabolism	Wikipathways	0		70 (91)	1	1	15	HMDB00187;HMDB00162;HMDB00696;HMDB00167;HMDB00725;HMDB00168;HMDB00883;HMDB00172;HMDB00159;HMDB00929;HMDB00158;HMDB00148;HMDB00125;HMDB00687;HMDB13773;HMDB00177	39 (108)	4.33e-05	0.00332	0.000479	0.0215
97	Silver	Ag NP-NM300K 01h	Up	Central carbon metabolism in cancer - Homo sapiens (human)	KEGG	0		53 (67)	1	1	12	HMDB00187;HMDB00162;HMDB00696;HMDB00172;HMDB00168;HMDB00883;HMDB00148;HMDB00159;HMDB00929;HMDB00158;HMDB00687;HMDB13773;HMDB00177	27 (37)	5.35e-05	0.00402	0.000579	0.0246
98	Silver	Ag NP-NM300K 01h	Up	Gene Expression	Reactome	0		1495 (1755)	1	1	12	HMDB00162;HMDB00172;HMDB00168;HMDB00883;HMDB00148;HMDB00159;HMDB00929;HMDB00158;HMDB01173;HMDB00125;HMDB00687;HMDB13773;HMDB00177	28 (149)	8.35e-05	0.00616	0.000868	0.0345
99	Silver	Ag NP-NM300K 01h	Up	ABC transporters - Homo sapiens (human)	KEGG	0		27 (45)	1	1	15	HMDB00187;HMDB00247;HMDB00162;HMDB00167;HMDB00765;HMDB01149;HMDB00883;HMDB00172;HMDB00159;HMDB00148;HMDB00043;HMDB00125;HMDB00030;HMDB00687;HMDB13773;HMDB00177	41 (128)	8.73e-05	0.00633	0.000904	0.0345
100	Silver	Ag NP-NM300K 01h	Up	Amino acid and oligopeptide SLC transporters	Reactome	0		22 (51)	1	1	13	HMDB00162;HMDB00172;HMDB00168;HMDB00883;HMDB03406;HMDB00159;HMDB00929;HMDB06055;HMDB00158;HMDB00148;HMDB00043;HMDB00687;HMDB13773;HMDB00177	33 (49)	0.000117	0.00817	0.00117	0.0427
101	Silver	Ag NP-NM300K 01h	Down	Gastrin-CREB signalling pathway via PKC and MAPK	Wikipathways	0		0 (0)	1	1	11	HMDB00237;HMDB00039;HMDB00042;HMDB00220;HMDB00826;HMDB00148;HMDB03208;HMDB02995;HMDB00638;HMDB00535;HMDB00573;HMDB00207	11 (37)	7.37e-06	0.00735	7.37e-06	0.00735
102	Silver	Ag NP-NM300K 01h	Down	the visual cycle I (vertebrates)	HumanCyc	0		7 (17)	1	1	16	HMDB01358;HMDB00039;HMDB03229;HMDB00638;HMDB00827;HMDB03208;HMDB00806;HMDB02212;HMDB02152;HMDB02995;HMDB00220;HMDB00801;HMDB00535;HMDB00573;HMDB00207;HMDB36217;HMDB00847	18 (68)	2.14e-06	0.00735	3e-05	0.0464
103	Silver	Ag NP-NM300K 01h	Down	sphingosine and sphingosine-1-phosphate metabolism	HumanCyc	0		8 (9)	1	1	15	HMDB00039;HMDB02142;HMDB03229;HMDB00827;HMDB03208;HMDB00806;HMDB02212;HMDB00638;HMDB02995;HMDB00220;HMDB00801;HMDB00535;HMDB00573;HMDB00207;HMDB36217;HMDB00847	17 (69)	5.79e-06	0.00735	7.56e-05	0.0486
104	Silver	Ag NP-NM300K 01h	Down	Free fatty acid receptors	Reactome	0		1 (5)	1	1	11	HMDB00237;HMDB00039;HMDB00042;HMDB00220;HMDB00826;HMDB00827;HMDB00638;HMDB00806;HMDB03229;HMDB00535;HMDB00573;HMDB00207	11 (24)	7.37e-06	0.00735	9.45e-05	0.0486
105	Silver	Ag NP-NM300K 06h	Up	Nonsense Mediated Decay (NMD) enhanced by the Exon Junction Complex (EJC)	Reactome	19	ENSG00000122026;ENSG00000116251;ENSG00000125691;ENSG00000186468;ENSG00000114391;ENSG00000161970;ENSG00000145592;ENSG00000122406;ENSG00000071082;ENSG00000147604;ENSG00000162385;ENSG00000138326;ENSG00000165502;ENSG00000143947;ENSG00000185088;ENSG00000198918;ENSG00000229117;ENSG00000241343;ENSG00000142676	110 (122)	3.77e-12	2.71e-09	0		0 (4)	1	1	3.77e-12	2.71e-09
106	Silver	Ag NP-NM300K 06h	Up	Nonsense-Mediated Decay (NMD)	Reactome	19	ENSG00000122026;ENSG00000116251;ENSG00000125691;ENSG00000186468;ENSG00000114391;ENSG00000161970;ENSG00000145592;ENSG00000122406;ENSG00000071082;ENSG00000147604;ENSG00000162385;ENSG00000138326;ENSG00000165502;ENSG00000143947;ENSG00000185088;ENSG00000198918;ENSG00000229117;ENSG00000241343;ENSG00000142676	110 (122)	3.77e-12	2.71e-09	0		0 (4)	1	1	3.77e-12	2.71e-09
107	Silver	Ag NP-NM300K 06h	Up	Nonsense Mediated Decay (NMD) independent of the Exon Junction Complex (EJC)	Reactome	18	ENSG00000122026;ENSG00000116251;ENSG00000125691;ENSG00000114391;ENSG00000161970;ENSG00000145592;ENSG00000122406;ENSG00000071082;ENSG00000147604;ENSG00000186468;ENSG00000138326;ENSG00000165502;ENSG00000143947;ENSG00000185088;ENSG00000198918;ENSG00000229117;ENSG00000241343;ENSG00000142676	98 (109)	4.83e-12	2.98e-09	0		0 (2)	1	1	4.83e-12	2.98e-09
108	Silver	Ag NP-NM300K 06h	Up	L13a-mediated translational silencing of Ceruloplasmin expression	Reactome	19	ENSG00000122026;ENSG00000116251;ENSG00000142676;ENSG00000125691;ENSG00000114391;ENSG00000161970;ENSG00000145592;ENSG00000122406;ENSG00000071082;ENSG00000147604;ENSG00000186468;ENSG00000138326;ENSG00000165502;ENSG00000143947;ENSG00000185088;ENSG00000198918;ENSG00000229117;ENSG00000241343;ENSG00000125977	116 (129)	1.01e-11	4.34e-09	0		0 (1)	1	1	1.01e-11	4.34e-09
109	Silver	Ag NP-NM300K 06h	Up	SRP-dependent cotranslational protein targeting to membrane	Reactome	19	ENSG00000122026;ENSG00000116251;ENSG00000125691;ENSG00000140319;ENSG00000114391;ENSG00000161970;ENSG00000145592;ENSG00000122406;ENSG00000071082;ENSG00000147604;ENSG00000186468;ENSG00000138326;ENSG00000165502;ENSG00000143947;ENSG00000185088;ENSG00000198918;ENSG00000229117;ENSG00000241343;ENSG00000142676	116 (126)	1.01e-11	4.34e-09	0		0 (1)	1	1	1.01e-11	4.34e-09
110	Silver	Ag NP-NM300K 06h	Up	3_ -UTR-mediated translational regulation	Reactome	19	ENSG00000122026;ENSG00000116251;ENSG00000142676;ENSG00000125691;ENSG00000114391;ENSG00000161970;ENSG00000145592;ENSG00000122406;ENSG00000071082;ENSG00000147604;ENSG00000186468;ENSG00000138326;ENSG00000165502;ENSG00000143947;ENSG00000185088;ENSG00000198918;ENSG00000229117;ENSG00000241343;ENSG00000125977	116 (129)	1.01e-11	4.34e-09	0		0 (1)	1	1	1.01e-11	4.34e-09
111	Silver	Ag NP-NM300K 06h	Up	Ribosome - Homo sapiens (human)	KEGG	20	ENSG00000122026;ENSG00000116251;ENSG00000125691;ENSG00000147604;ENSG00000114391;ENSG00000161970;ENSG00000142676;ENSG00000122406;ENSG00000185088;ENSG00000071082;ENSG00000243147;ENSG00000112110;ENSG00000186468;ENSG00000138326;ENSG00000165502;ENSG00000145592;ENSG00000143947;ENSG00000198918;ENSG00000229117;ENSG00000241343	133 (154)	1.43e-11	5.14e-09	0		0 (0)	1	1	1.43e-11	5.14e-09
112	Silver	Ag NP-NM300K 06h	Up	Formation of a pool of free 40S subunits	Reactome	18	ENSG00000122026;ENSG00000116251;ENSG00000125691;ENSG00000114391;ENSG00000161970;ENSG00000142676;ENSG00000122406;ENSG00000071082;ENSG00000147604;ENSG00000143947;ENSG00000186468;ENSG00000138326;ENSG00000165502;ENSG00000145592;ENSG00000185088;ENSG00000198918;ENSG00000229117;ENSG00000241343	106 (117)	1.93e-11	6.43e-09	0		0 (0)	1	1	1.93e-11	6.43e-09
113	Silver	Ag NP-NM300K 06h	Up	Eukaryotic Translation Elongation	Reactome	19	ENSG00000122026;ENSG00000116251;ENSG00000125691;ENSG00000114391;ENSG00000161970;ENSG00000145592;ENSG00000114942;ENSG00000122406;ENSG00000071082;ENSG00000147604;ENSG00000186468;ENSG00000138326;ENSG00000165502;ENSG00000143947;ENSG00000185088;ENSG00000198918;ENSG00000229117;ENSG00000241343;ENSG00000142676	98 (108)	4.29e-13	1.85e-09	0		1 (25)	1	1	1.26e-11	1.13e-08
114	Silver	Ag NP-NM300K 06h	Up	Cytoplasmic Ribosomal Proteins	Wikipathways	16	ENSG00000122026;ENSG00000116251;ENSG00000125691;ENSG00000114391;ENSG00000161970;ENSG00000142676;ENSG00000122406;ENSG00000071082;ENSG00000147604;ENSG00000186468;ENSG00000138326;ENSG00000145592;ENSG00000143947;ENSG00000198918;ENSG00000229117;ENSG00000241343	86 (88)	6.38e-11	1.72e-08	0		0 (0)	1	1	6.38e-11	1.72e-08
115	Silver	Ag NP-NM300K 06h	Up	Peptide chain elongation	Reactome	18	ENSG00000122026;ENSG00000116251;ENSG00000125691;ENSG00000114391;ENSG00000161970;ENSG00000145592;ENSG00000122406;ENSG00000071082;ENSG00000147604;ENSG00000186468;ENSG00000138326;ENSG00000165502;ENSG00000143947;ENSG00000185088;ENSG00000198918;ENSG00000229117;ENSG00000241343;ENSG00000142676	93 (103)	1.89e-12	2.71e-09	0		1 (25)	1	1	5.28e-11	2.05e-08
116	Silver	Ag NP-NM300K 06h	Up	Selenocysteine synthesis	Reactome	18	ENSG00000122026;ENSG00000116251;ENSG00000125691;ENSG00000114391;ENSG00000161970;ENSG00000145592;ENSG00000122406;ENSG00000071082;ENSG00000147604;ENSG00000186468;ENSG00000138326;ENSG00000165502;ENSG00000143947;ENSG00000185088;ENSG00000198918;ENSG00000229117;ENSG00000241343;ENSG00000142676	95 (105)	2.77e-12	2.71e-09	0		2 (18)	1	1	7.64e-11	2.05e-08
117	Silver	Ag NP-NM300K 06h	Up	Eukaryotic Translation Termination	Reactome	18	ENSG00000122026;ENSG00000116251;ENSG00000125691;ENSG00000114391;ENSG00000161970;ENSG00000145592;ENSG00000122406;ENSG00000071082;ENSG00000147604;ENSG00000186468;ENSG00000138326;ENSG00000165502;ENSG00000143947;ENSG00000185088;ENSG00000198918;ENSG00000229117;ENSG00000241343;ENSG00000142676	96 (106)	3.34e-12	2.71e-09	0		2 (10)	1	1	9.16e-11	2.05e-08
118	Silver	Ag NP-NM300K 06h	Up	Metallothioneins bind metals	Reactome	6	ENSG00000205362;ENSG00000169688;ENSG00000198417;ENSG00000125144;ENSG00000187193;ENSG00000125148	6 (12)	1.27e-10	2.75e-08	0		0 (4)	1	1	1.27e-10	2.75e-08
119	Silver	Ag NP-NM300K 06h	Up	Response to metal ions	Reactome	6	ENSG00000205362;ENSG00000169688;ENSG00000198417;ENSG00000125144;ENSG00000187193;ENSG00000125148	6 (12)	1.27e-10	2.75e-08	0		0 (4)	1	1	1.27e-10	2.75e-08
120	Silver	Ag NP-NM300K 06h	Up	Mineral absorption - Homo sapiens (human)	KEGG	9	ENSG00000170385;ENSG00000205362;ENSG00000070961;ENSG00000198417;ENSG00000125144;ENSG00000187193;ENSG00000125148;ENSG00000100292;ENSG00000169688	33 (52)	3.21e-08	6.47e-06	6	HMDB00696;HMDB00168;HMDB00172;HMDB00159;HMDB00929;HMDB00687;HMDB13773	15 (29)	0.000226	0.0725	1.93e-10	3.46e-08
121	Silver	Ag NP-NM300K 06h	Up	GTP hydrolysis and joining of the 60S ribosomal subunit	Reactome	19	ENSG00000122026;ENSG00000116251;ENSG00000142676;ENSG00000125691;ENSG00000114391;ENSG00000161970;ENSG00000145592;ENSG00000122406;ENSG00000071082;ENSG00000147604;ENSG00000186468;ENSG00000138326;ENSG00000165502;ENSG00000143947;ENSG00000185088;ENSG00000198918;ENSG00000229117;ENSG00000241343;ENSG00000125977	117 (129)	1.18e-11	4.62e-09	0		1 (4)	1	1	3.08e-10	4.6e-08
122	Silver	Ag NP-NM300K 06h	Up	Cap-dependent Translation Initiation	Reactome	19	ENSG00000122026;ENSG00000116251;ENSG00000142676;ENSG00000125691;ENSG00000114391;ENSG00000161970;ENSG00000145592;ENSG00000122406;ENSG00000071082;ENSG00000147604;ENSG00000186468;ENSG00000138326;ENSG00000165502;ENSG00000143947;ENSG00000185088;ENSG00000198918;ENSG00000229117;ENSG00000241343;ENSG00000125977	124 (137)	3.39e-11	9.77e-09	0		1 (6)	1	1	8.52e-10	9.54e-08
123	Silver	Ag NP-NM300K 06h	Up	Eukaryotic Translation Initiation	Reactome	19	ENSG00000122026;ENSG00000116251;ENSG00000142676;ENSG00000125691;ENSG00000114391;ENSG00000161970;ENSG00000145592;ENSG00000122406;ENSG00000071082;ENSG00000147604;ENSG00000186468;ENSG00000138326;ENSG00000165502;ENSG00000143947;ENSG00000185088;ENSG00000198918;ENSG00000229117;ENSG00000241343;ENSG00000125977	124 (137)	3.39e-11	9.77e-09	0		1 (6)	1	1	8.52e-10	9.54e-08
124	Silver	Ag NP-NM300K 06h	Up	Translation	Reactome	21	ENSG00000122026;ENSG00000116251;ENSG00000142676;ENSG00000125691;ENSG00000140319;ENSG00000114391;ENSG00000161970;ENSG00000145592;ENSG00000114942;ENSG00000122406;ENSG00000071082;ENSG00000147604;ENSG00000186468;ENSG00000138326;ENSG00000165502;ENSG00000143947;ENSG00000185088;ENSG00000198918;ENSG00000229117;ENSG00000241343;ENSG00000125977	164 (177)	9.87e-11	2.51e-08	0		2 (33)	1	1	2.37e-09	2.21e-07
125	Silver	Ag NP-NM300K 06h	Up	Selenoamino acid metabolism	Reactome	18	ENSG00000122026;ENSG00000116251;ENSG00000125691;ENSG00000114391;ENSG00000161970;ENSG00000145592;ENSG00000122406;ENSG00000071082;ENSG00000147604;ENSG00000186468;ENSG00000138326;ENSG00000165502;ENSG00000143947;ENSG00000185088;ENSG00000198918;ENSG00000229117;ENSG00000241343;ENSG00000142676	117 (132)	1.07e-10	2.57e-08	0		9 (61)	1	1	2.57e-09	2.21e-07
126	Silver	Ag NP-NM300K 06h	Up	Metabolism of amino acids and derivatives	Reactome	22	ENSG00000122026;ENSG00000116251;ENSG00000125691;ENSG00000114391;ENSG00000161970;ENSG00000071082;ENSG00000165502;ENSG00000145592;ENSG00000198918;ENSG00000229117;ENSG00000241343;ENSG00000070669;ENSG00000132824;ENSG00000102172;ENSG00000186468;ENSG00000138326;ENSG00000143947;ENSG00000122406;ENSG00000147604;ENSG00000142676;ENSG00000185088;ENSG00000155096	248 (328)	3.83e-08	7.19e-06	11	HMDB00517;HMDB00965;HMDB00168;HMDB00172;HMDB02215;HMDB00929;HMDB00159;HMDB01173;HMDB00734;HMDB00687;HMDB13773;HMDB00574	67 (272)	0.00296	0.218	2.71e-09	2.21e-07
127	Silver	Ag NP-NM300K 06h	Up	Attenuation phase	Reactome	8	ENSG00000105993;ENSG00000204388;ENSG00000112110;ENSG00000004478;ENSG00000120694;ENSG00000170315;ENSG00000080824;ENSG00000096384	24 (29)	3.3e-08	6.47e-06	0		0 (2)	1	1	3.3e-08	6.47e-06
128	Silver	Ag NP-NM300K 06h	Up	Zinc homeostasis	Wikipathways	8	ENSG00000170385;ENSG00000158014;ENSG00000205362;ENSG00000169688;ENSG00000198417;ENSG00000125144;ENSG00000187193;ENSG00000125148	26 (37)	6.74e-08	1.21e-05	0		0 (1)	1	1	6.74e-08	1.21e-05
129	Silver	Ag NP-NM300K 06h	Up	HSF1 activation	Reactome	8	ENSG00000105993;ENSG00000204388;ENSG00000112110;ENSG00000004478;ENSG00000120694;ENSG00000170315;ENSG00000080824;ENSG00000096384	27 (31)	9.39e-08	1.62e-05	0		0 (0)	1	1	9.39e-08	1.62e-05
130	Silver	Ag NP-NM300K 06h	Up	HSF1-dependent transactivation	Reactome	8	ENSG00000105993;ENSG00000204388;ENSG00000112110;ENSG00000004478;ENSG00000120694;ENSG00000170315;ENSG00000080824;ENSG00000096384	30 (37)	2.33e-07	3.88e-05	0		0 (4)	1	1	2.33e-07	3.88e-05
131	Silver	Ag NP-NM300K 06h	Up	Pink/Parkin Mediated Mitophagy	Reactome	6	ENSG00000175768;ENSG00000196683;ENSG00000170315;ENSG00000150991;ENSG00000143947;ENSG00000140941	21 (23)	5.19e-06	0.000773	0		0 (0)	1	1	5.19e-06	0.000773
132	Silver	Ag NP-NM300K 06h	Up	Mitophagy	Reactome	6	ENSG00000175768;ENSG00000196683;ENSG00000170315;ENSG00000150991;ENSG00000143947;ENSG00000140941	21 (23)	5.19e-06	0.000773	0		0 (0)	1	1	5.19e-06	0.000773
133	Silver	Ag NP-NM300K 06h	Up	Photodynamic therapy-induced unfolded protein response	Wikipathways	6	ENSG00000101255;ENSG00000175197;ENSG00000162772;ENSG00000128272;ENSG00000070669;ENSG00000087074	25 (27)	1.57e-05	0.00226	0		0 (0)	1	1	1.57e-05	0.00226
134	Silver	Ag NP-NM300K 06h	Up	Cellular response to heat stress	Wikipathways	5	ENSG00000004478;ENSG00000105993;ENSG00000112110;ENSG00000170315;ENSG00000120694	12 (16)	4e-06	0.000639	0		2 (9)	1	1	5.37e-05	0.00401
135	Silver	Ag NP-NM300K 06h	Up	tRNA charging	HumanCyc	1	ENSG00000106105	38 (41)	0.583	1	8	HMDB00696;HMDB00517;HMDB00168;HMDB00172;HMDB00159;HMDB00929;HMDB00574;HMDB00687;HMDB13773	20 (24)	1.6e-05	0.0293	0.000117	0.00809
136	Silver	Ag NP-NM300K 06h	Up	Copper homeostasis	Wikipathways	7	ENSG00000205362;ENSG00000169688;ENSG00000198417;ENSG00000125144;ENSG00000187193;ENSG00000125148;ENSG00000142168	45 (55)	6.11e-05	0.00825	0		0 (2)	1	1	6.11e-05	0.00825
137	Silver	Ag NP-NM300K 06h	Up	Gene Expression	Reactome	43	ENSG00000122026;ENSG00000144381;ENSG00000116251;ENSG00000125691;ENSG00000114391;ENSG00000161970;ENSG00000114942;ENSG00000071082;ENSG00000170315;ENSG00000162385;ENSG00000089195;ENSG00000165502;ENSG00000145592;ENSG00000104765;ENSG00000198918;ENSG00000229117;ENSG00000112081;ENSG00000241343;ENSG00000181163;ENSG00000115875;ENSG00000109534;ENSG00000065978;ENSG00000196235;ENSG00000106105;ENSG00000138326…	1495 (1755)	0.0539	0.939	8	HMDB00517;HMDB00168;HMDB00172;HMDB01173;HMDB00929;HMDB00159;HMDB00574;HMDB00687;HMDB13773	28 (149)	0.000265	0.0753	0.000173	0.0111
138	Silver	Ag NP-NM300K 06h	Up	Aminoacyl-tRNA biosynthesis - Homo sapiens (human)	KEGG	1	ENSG00000106105	46 (66)	0.654	1	8	HMDB00696;HMDB00517;HMDB00168;HMDB00172;HMDB00159;HMDB00929;HMDB00574;HMDB00687;HMDB13773	22 (52)	3.67e-05	0.0293	0.000279	0.0167
139	Silver	Ag NP-NM300K 06h	Up	Mitochondrial tRNA aminoacylation	Reactome	1	ENSG00000106105	21 (23)	0.383	1	7	HMDB00517;HMDB00168;HMDB00172;HMDB00574;HMDB00929;HMDB00159;HMDB00687;HMDB13773	18 (66)	7.53e-05	0.0334	0.000331	0.0185
140	Silver	Ag NP-NM300K 06h	Up	Cytosolic tRNA aminoacylation	Reactome	1	ENSG00000106105	24 (26)	0.424	1	7	HMDB00517;HMDB00168;HMDB00172;HMDB00574;HMDB00929;HMDB00159;HMDB00687;HMDB13773	18 (66)	7.53e-05	0.0334	0.000363	0.019
141	Silver	Ag NP-NM300K 06h	Up	Amino acid transport across the plasma membrane	Reactome	2	ENSG00000111371;ENSG00000134294	17 (31)	0.0559	0.954	7	HMDB00517;HMDB00168;HMDB00172;HMDB00159;HMDB00929;HMDB00574;HMDB00687;HMDB13773	24 (32)	0.000604	0.142	0.000381	0.019
142	Silver	Ag NP-NM300K 06h	Up	leukotriene biosynthesis	HumanCyc	0		1 (5)	1	1	8	HMDB00696;HMDB00517;HMDB00168;HMDB00172;HMDB00159;HMDB00929;HMDB00574;HMDB00687;HMDB13773	22 (30)	3.67e-05	0.0293	0.000412	0.0194
143	Silver	Ag NP-NM300K 06h	Up	Cellular response to heat stress	Reactome	10	ENSG00000105993;ENSG00000204388;ENSG00000170315;ENSG00000100380;ENSG00000004478;ENSG00000080824;ENSG00000112110;ENSG00000120694;ENSG00000225217;ENSG00000096384	93 (100)	4.54e-05	0.00633	0		2 (9)	1	1	0.0005	0.0209
144	Silver	Ag NP-NM300K 06h	Up	Biopterin metabolism	EHMN	2	ENSG00000111371;ENSG00000134294	9 (16)	0.0166	0.449	3	HMDB02065;HMDB00159;HMDB02215	5 (24)	0.00277	0.218	0.000506	0.0209
145	Silver	Ag NP-NM300K 06h	Up	tRNA Aminoacylation	Reactome	1	ENSG00000106105	42 (45)	0.62	1	7	HMDB00517;HMDB00168;HMDB00172;HMDB00574;HMDB00929;HMDB00159;HMDB00687;HMDB13773	18 (66)	7.53e-05	0.0334	0.000512	0.0209
146	Silver	Ag NP-NM300K 06h	Up	<i>S</i>-methyl-5-thio-&alpha;-D-ribose 1-phosphate degradation	HumanCyc	0		4 (4)	1	1	8	HMDB00696;HMDB00517;HMDB00168;HMDB00172;HMDB00159;HMDB00929;HMDB00574;HMDB00687;HMDB13773	23 (35)	5.36e-05	0.0334	0.000581	0.0226
147	Silver	Ag NP-NM300K 06h	Up	Vpu mediated degradation of CD4	Reactome	3	ENSG00000143947;ENSG00000170315;ENSG00000150991	6 (7)	0.00022	0.0259	0		0 (0)	1	1	0.00022	0.0259
148	Silver	Ag NP-NM300K 06h	Up	CDK-mediated phosphorylation and removal of Cdc6	Reactome	3	ENSG00000143947;ENSG00000170315;ENSG00000150991	6 (6)	0.00022	0.0259	0		0 (2)	1	1	0.00022	0.0259
149	Silver	Ag NP-NM300K 06h	Up	Ubiquitin-dependent degradation of Cyclin D1	Reactome	3	ENSG00000143947;ENSG00000170315;ENSG00000150991	6 (6)	0.00022	0.0259	0		0 (2)	1	1	0.00022	0.0259
150	Silver	Ag NP-NM300K 06h	Up	Ubiquitin-dependent degradation of Cyclin D	Reactome	3	ENSG00000143947;ENSG00000170315;ENSG00000150991	6 (6)	0.00022	0.0259	0		0 (2)	1	1	0.00022	0.0259
151	Silver	Ag NP-NM300K 06h	Up	Class I MHC mediated antigen processing & presentation	Wikipathways	0		0 (0)	1	1	8	HMDB00696;HMDB00517;HMDB00168;HMDB00172;HMDB00159;HMDB00929;HMDB00574;HMDB00687;HMDB13773	21 (35)	2.46e-05	0.0293	2.46e-05	0.0293
152	Silver	Ag NP-NM300K 06h	Up	tRNA Aminoacylation	Wikipathways	0		0 (0)	1	1	8	HMDB00696;HMDB00517;HMDB00168;HMDB00172;HMDB00159;HMDB00929;HMDB00574;HMDB00687;HMDB13773	21 (26)	2.46e-05	0.0293	2.46e-05	0.0293
153	Silver	Ag NP-NM300K 06h	Up	miR-targeted genes in muscle cell - TarBase	Wikipathways	18	ENSG00000110880;ENSG00000163814;ENSG00000167460;ENSG00000171530;ENSG00000134294;ENSG00000152661;ENSG00000143384;ENSG00000135318;ENSG00000128567;ENSG00000065911;ENSG00000187514;ENSG00000153250;ENSG00000006831;ENSG00000111371;ENSG00000144824;ENSG00000100292;ENSG00000028203;ENSG00000110172	315 (398)	0.000281	0.0311	0		0 (0)	1	1	0.000281	0.0311
154	Silver	Ag NP-NM300K 06h	Up	Autodegradation of the E3 ubiquitin ligase COP1	Reactome	3	ENSG00000143947;ENSG00000170315;ENSG00000150991	7 (7)	0.000378	0.0372	0		0 (2)	1	1	0.000378	0.0372
155	Silver	Ag NP-NM300K 06h	Up	ATF4 activates genes	Wikipathways	3	ENSG00000070669;ENSG00000175197;ENSG00000162772	7 (7)	0.000378	0.0372	0		0 (0)	1	1	0.000378	0.0372
156	Silver	Ag NP-NM300K 06h	Up	Downregulation of ERBB4 signaling	Reactome	3	ENSG00000143947;ENSG00000170315;ENSG00000150991	7 (8)	0.000378	0.0372	0		0 (0)	1	1	0.000378	0.0372
157	Silver	Ag NP-NM300K 06h	Up	TGF-beta receptor signaling in EMT (epithelial to mesenchymal transition)	Reactome	4	ENSG00000143947;ENSG00000170315;ENSG00000150991;ENSG00000198742	16 (17)	0.000379	0.0372	0		0 (2)	1	1	0.000379	0.0372
158	Silver	Ag NP-NM300K 06h	Down	none statistically significant at q<0.05
159	Silver	Ag NP-NM300K 24h	Up	Mineral absorption - Homo sapiens (human)	KEGG	7	ENSG00000170385;ENSG00000205362;ENSG00000198417;ENSG00000125144;ENSG00000187193;ENSG00000125148;ENSG00000100292	33 (52)	2.73e-05	0.0274	9	HMDB00187;HMDB00696;HMDB00167;HMDB00168;HMDB00123;HMDB00172;HMDB00159;HMDB00929;HMDB00687;HMDB13773	15 (29)	8.13e-08	3.6e-05	6.18e-11	6.91e-08
160	Silver	Ag NP-NM300K 24h	Up	Class I MHC mediated antigen processing & presentation	Wikipathways	0		0 (0)	1	1	12	HMDB00187;HMDB00696;HMDB00517;HMDB00167;HMDB00168;HMDB00123;HMDB00172;HMDB00159;HMDB00929;HMDB00574;HMDB00687;HMDB13773;HMDB00177	21 (35)	6.69e-10	8.89e-07	6.69e-10	8.89e-07
161	Silver	Ag NP-NM300K 24h	Up	tRNA Aminoacylation	Wikipathways	0		0 (0)	1	1	12	HMDB00187;HMDB00696;HMDB00517;HMDB00167;HMDB00168;HMDB00123;HMDB00172;HMDB00159;HMDB00929;HMDB00574;HMDB00687;HMDB13773;HMDB00177	21 (26)	6.69e-10	8.89e-07	6.69e-10	8.89e-07
162	Silver	Ag NP-NM300K 24h	Up	tRNA charging	HumanCyc	1	ENSG00000196305	38 (41)	0.659	1	12	HMDB00187;HMDB00696;HMDB00517;HMDB00167;HMDB00168;HMDB00123;HMDB00172;HMDB00159;HMDB00929;HMDB00574;HMDB00687;HMDB13773;HMDB00177	20 (24)	3.01e-10	8.89e-07	4.63e-09	2.59e-06
163	Silver	Ag NP-NM300K 24h	Up	Aminoacyl-tRNA biosynthesis - Homo sapiens (human)	KEGG	1	ENSG00000196305	46 (66)	0.728	1	12	HMDB00187;HMDB00696;HMDB00517;HMDB00167;HMDB00168;HMDB00123;HMDB00172;HMDB00159;HMDB00929;HMDB00574;HMDB00687;HMDB13773;HMDB00177	22 (52)	1.4e-09	1.12e-06	2.22e-08	6.71e-06
164	Silver	Ag NP-NM300K 24h	Up	Amino acid transport across the plasma membrane	Reactome	4	ENSG00000151012;ENSG00000111371;ENSG00000131389;ENSG00000134294	17 (31)	0.00105	0.226	10	HMDB00517;HMDB00172;HMDB00168;HMDB00123;HMDB03406;HMDB00159;HMDB00929;HMDB00574;HMDB00687;HMDB13773;HMDB00177	24 (32)	1.19e-06	0.000106	2.69e-08	6.71e-06
165	Silver	Ag NP-NM300K 24h	Up	leukotriene biosynthesis	HumanCyc	0		1 (5)	1	1	12	HMDB00187;HMDB00696;HMDB00517;HMDB00167;HMDB00168;HMDB00123;HMDB00172;HMDB00159;HMDB00929;HMDB00574;HMDB00687;HMDB13773;HMDB00177	22 (30)	1.4e-09	1.12e-06	3e-08	6.71e-06
166	Silver	Ag NP-NM300K 24h	Up	<i>S</i>-methyl-5-thio-&alpha;-D-ribose 1-phosphate degradation	HumanCyc	0		4 (4)	1	1	12	HMDB00187;HMDB00696;HMDB00517;HMDB00167;HMDB00168;HMDB00123;HMDB00172;HMDB00159;HMDB00929;HMDB00574;HMDB00687;HMDB13773;HMDB00177	23 (35)	2.8e-09	1.86e-06	5.79e-08	1.08e-05
167	Silver	Ag NP-NM300K 24h	Up	Protein digestion and absorption - Homo sapiens (human)	KEGG	1	ENSG00000134294	36 (90)	0.639	1	13	HMDB00187;HMDB00696;HMDB00517;HMDB00167;HMDB00168;HMDB00123;HMDB00172;HMDB00159;HMDB00929;HMDB34301;HMDB00574;HMDB00687;HMDB13773;HMDB00177	31 (47)	1.57e-08	8.93e-06	1.95e-07	3.11e-05
168	Silver	Ag NP-NM300K 24h	Up	&gamma;-glutamyl cycle	HumanCyc	1	ENSG00000023909	6 (6)	0.156	1	12	HMDB00187;HMDB00696;HMDB00517;HMDB00167;HMDB00168;HMDB00123;HMDB00172;HMDB00159;HMDB00929;HMDB00574;HMDB00687;HMDB13773;HMDB00177	29 (48)	8.03e-08	3.6e-05	2.4e-07	3.36e-05
169	Silver	Ag NP-NM300K 24h	Up	Phase II conjugation	Wikipathways	0		0 (0)	1	1	13	HMDB00187;HMDB00696;HMDB00517;HMDB00167;HMDB00168;HMDB00123;HMDB00172;HMDB00159;HMDB00929;HMDB00574;HMDB00714;HMDB00687;HMDB13773;HMDB00177	37 (164)	2.04e-07	6.12e-05	2.04e-07	6.12e-05
170	Silver	Ag NP-NM300K 24h	Up	Transport of inorganic cations-anions and amino acids-oligopeptides	Wikipathways	0		0 (0)	1	1	13	HMDB00187;HMDB00696;HMDB00517;HMDB00167;HMDB03406;HMDB00168;HMDB00123;HMDB00172;HMDB00159;HMDB00929;HMDB00574;HMDB00687;HMDB13773;HMDB00177	37 (51)	2.04e-07	6.12e-05	2.04e-07	6.12e-05
171	Silver	Ag NP-NM300K 24h	Up	Josamycin Action Pathway	SMPDB	0		0 (0)	1	1	7	HMDB00696;HMDB00167;HMDB00168;HMDB03406;HMDB00172;HMDB00687;HMDB13773;HMDB00177	10 (20)	6.52e-07	6.12e-05	6.52e-07	6.12e-05
172	Silver	Ag NP-NM300K 24h	Up	Erythromycin Action Pathway	SMPDB	0		0 (0)	1	1	7	HMDB00696;HMDB00167;HMDB00168;HMDB03406;HMDB00172;HMDB00687;HMDB13773;HMDB00177	10 (20)	6.52e-07	6.12e-05	6.52e-07	6.12e-05
173	Silver	Ag NP-NM300K 24h	Up	Tigecycline Action Pathway	SMPDB	0		0 (0)	1	1	7	HMDB00696;HMDB00167;HMDB00168;HMDB03406;HMDB00172;HMDB00687;HMDB13773;HMDB00177	10 (20)	6.52e-07	6.12e-05	6.52e-07	6.12e-05
174	Silver	Ag NP-NM300K 24h	Up	Arbekacin Action Pathway	SMPDB	0		0 (0)	1	1	7	HMDB00696;HMDB00167;HMDB00168;HMDB03406;HMDB00172;HMDB00687;HMDB13773;HMDB00177	10 (20)	6.52e-07	6.12e-05	6.52e-07	6.12e-05
175	Silver	Ag NP-NM300K 24h	Up	Paromomycin Action Pathway	SMPDB	0		0 (0)	1	1	7	HMDB00696;HMDB00167;HMDB00168;HMDB03406;HMDB00172;HMDB00687;HMDB13773;HMDB00177	10 (20)	6.52e-07	6.12e-05	6.52e-07	6.12e-05
176	Silver	Ag NP-NM300K 24h	Up	Lincomycin Action Pathway	SMPDB	0		0 (0)	1	1	7	HMDB00696;HMDB00167;HMDB00168;HMDB03406;HMDB00172;HMDB00687;HMDB13773;HMDB00177	10 (20)	6.52e-07	6.12e-05	6.52e-07	6.12e-05
177	Silver	Ag NP-NM300K 24h	Up	Demeclocycline Action Pathway	SMPDB	0		0 (0)	1	1	7	HMDB00696;HMDB00167;HMDB00168;HMDB03406;HMDB00172;HMDB00687;HMDB13773;HMDB00177	10 (20)	6.52e-07	6.12e-05	6.52e-07	6.12e-05
178	Silver	Ag NP-NM300K 24h	Up	Methacycline Action Pathway	SMPDB	0		0 (0)	1	1	7	HMDB00696;HMDB00167;HMDB00168;HMDB03406;HMDB00172;HMDB00687;HMDB13773;HMDB00177	10 (20)	6.52e-07	6.12e-05	6.52e-07	6.12e-05
179	Silver	Ag NP-NM300K 24h	Up	Rolitetracycline Action Pathway	SMPDB	0		0 (0)	1	1	7	HMDB00696;HMDB00167;HMDB00168;HMDB03406;HMDB00172;HMDB00687;HMDB13773;HMDB00177	10 (20)	6.52e-07	6.12e-05	6.52e-07	6.12e-05
180	Silver	Ag NP-NM300K 24h	Up	Streptomycin Action Pathway	SMPDB	0		0 (0)	1	1	7	HMDB00696;HMDB00167;HMDB00168;HMDB03406;HMDB00172;HMDB00687;HMDB13773;HMDB00177	10 (20)	6.52e-07	6.12e-05	6.52e-07	6.12e-05
181	Silver	Ag NP-NM300K 24h	Up	Spectinomycin Action Pathway	SMPDB	0		0 (0)	1	1	7	HMDB00696;HMDB00167;HMDB00168;HMDB03406;HMDB00172;HMDB00687;HMDB13773;HMDB00177	10 (20)	6.52e-07	6.12e-05	6.52e-07	6.12e-05
182	Silver	Ag NP-NM300K 24h	Up	Kanamycin Action Pathway	SMPDB	0		0 (0)	1	1	7	HMDB00696;HMDB00167;HMDB00168;HMDB03406;HMDB00172;HMDB00687;HMDB13773;HMDB00177	10 (20)	6.52e-07	6.12e-05	6.52e-07	6.12e-05
183	Silver	Ag NP-NM300K 24h	Up	Gentamicin Action Pathway	SMPDB	0		0 (0)	1	1	7	HMDB00696;HMDB00167;HMDB00168;HMDB03406;HMDB00172;HMDB00687;HMDB13773;HMDB00177	10 (20)	6.52e-07	6.12e-05	6.52e-07	6.12e-05
184	Silver	Ag NP-NM300K 24h	Up	Netilmicin Action Pathway	SMPDB	0		0 (0)	1	1	7	HMDB00696;HMDB00167;HMDB00168;HMDB03406;HMDB00172;HMDB00687;HMDB13773;HMDB00177	10 (20)	6.52e-07	6.12e-05	6.52e-07	6.12e-05
185	Silver	Ag NP-NM300K 24h	Up	Neomycin Action Pathway	SMPDB	0		0 (0)	1	1	7	HMDB00696;HMDB00167;HMDB00168;HMDB03406;HMDB00172;HMDB00687;HMDB13773;HMDB00177	10 (20)	6.52e-07	6.12e-05	6.52e-07	6.12e-05
186	Silver	Ag NP-NM300K 24h	Up	Amikacin Action Pathway	SMPDB	0		0 (0)	1	1	7	HMDB00696;HMDB00167;HMDB00168;HMDB03406;HMDB00172;HMDB00687;HMDB13773;HMDB00177	10 (20)	6.52e-07	6.12e-05	6.52e-07	6.12e-05
187	Silver	Ag NP-NM300K 24h	Up	Telithromycin Action Pathway	SMPDB	0		0 (0)	1	1	7	HMDB00696;HMDB00167;HMDB00168;HMDB03406;HMDB00172;HMDB00687;HMDB13773;HMDB00177	10 (20)	6.52e-07	6.12e-05	6.52e-07	6.12e-05
188	Silver	Ag NP-NM300K 24h	Up	Lymecycline Action Pathway	SMPDB	0		0 (0)	1	1	7	HMDB00696;HMDB00167;HMDB00168;HMDB03406;HMDB00172;HMDB00687;HMDB13773;HMDB00177	10 (20)	6.52e-07	6.12e-05	6.52e-07	6.12e-05
189	Silver	Ag NP-NM300K 24h	Up	Chloramphenicol Action Pathway	SMPDB	0		0 (0)	1	1	7	HMDB00696;HMDB00167;HMDB00168;HMDB03406;HMDB00172;HMDB00687;HMDB13773;HMDB00177	10 (20)	6.52e-07	6.12e-05	6.52e-07	6.12e-05
190	Silver	Ag NP-NM300K 24h	Up	Troleandomycin Action Pathway	SMPDB	0		0 (0)	1	1	7	HMDB00696;HMDB00167;HMDB00168;HMDB03406;HMDB00172;HMDB00687;HMDB13773;HMDB00177	10 (20)	6.52e-07	6.12e-05	6.52e-07	6.12e-05
191	Silver	Ag NP-NM300K 24h	Up	Azithromycin Action Pathway	SMPDB	0		0 (0)	1	1	7	HMDB00696;HMDB00167;HMDB00168;HMDB03406;HMDB00172;HMDB00687;HMDB13773;HMDB00177	10 (20)	6.52e-07	6.12e-05	6.52e-07	6.12e-05
192	Silver	Ag NP-NM300K 24h	Up	Roxithromycin Action Pathway	SMPDB	0		0 (0)	1	1	7	HMDB00696;HMDB00167;HMDB00168;HMDB03406;HMDB00172;HMDB00687;HMDB13773;HMDB00177	10 (20)	6.52e-07	6.12e-05	6.52e-07	6.12e-05
193	Silver	Ag NP-NM300K 24h	Up	Clindamycin Action Pathway	SMPDB	0		0 (0)	1	1	7	HMDB00696;HMDB00167;HMDB00168;HMDB03406;HMDB00172;HMDB00687;HMDB13773;HMDB00177	10 (20)	6.52e-07	6.12e-05	6.52e-07	6.12e-05
194	Silver	Ag NP-NM300K 24h	Up	Oxytetracycline Action Pathway	SMPDB	0		0 (0)	1	1	7	HMDB00696;HMDB00167;HMDB00168;HMDB03406;HMDB00172;HMDB00687;HMDB13773;HMDB00177	10 (20)	6.52e-07	6.12e-05	6.52e-07	6.12e-05
195	Silver	Ag NP-NM300K 24h	Up	Clarithromycin Action Pathway	SMPDB	0		0 (0)	1	1	7	HMDB00696;HMDB00167;HMDB00168;HMDB03406;HMDB00172;HMDB00687;HMDB13773;HMDB00177	10 (20)	6.52e-07	6.12e-05	6.52e-07	6.12e-05
196	Silver	Ag NP-NM300K 24h	Up	Tobramycin Action Pathway	SMPDB	0		0 (0)	1	1	7	HMDB00696;HMDB00167;HMDB00168;HMDB03406;HMDB00172;HMDB00687;HMDB13773;HMDB00177	10 (20)	6.52e-07	6.12e-05	6.52e-07	6.12e-05
197	Silver	Ag NP-NM300K 24h	Up	Minocycline Action Pathway	SMPDB	0		0 (0)	1	1	7	HMDB00696;HMDB00167;HMDB00168;HMDB03406;HMDB00172;HMDB00687;HMDB13773;HMDB00177	10 (20)	6.52e-07	6.12e-05	6.52e-07	6.12e-05
198	Silver	Ag NP-NM300K 24h	Up	Clomocycline Action Pathway	SMPDB	0		0 (0)	1	1	7	HMDB00696;HMDB00167;HMDB00168;HMDB03406;HMDB00172;HMDB00687;HMDB13773;HMDB00177	10 (20)	6.52e-07	6.12e-05	6.52e-07	6.12e-05
199	Silver	Ag NP-NM300K 24h	Up	Transport of glucose and other sugars_ bile salts and organic acids_ metal ions and amine compounds	Wikipathways	0		0 (0)	1	1	12	HMDB00187;HMDB00696;HMDB00517;HMDB00167;HMDB00168;HMDB00123;HMDB00172;HMDB00159;HMDB00929;HMDB00574;HMDB00687;HMDB13773;HMDB00177	34 (83)	6.64e-07	6.12e-05	6.64e-07	6.12e-05
200	Silver	Ag NP-NM300K 24h	Up	Transport of inorganic cations/anions and amino acids/oligopeptides	Reactome	7	ENSG00000111371;ENSG00000131389;ENSG00000065923;ENSG00000151012;ENSG00000134294;ENSG00000155850;ENSG00000144136	56 (107)	0.000861	0.196	10	HMDB00517;HMDB00172;HMDB00168;HMDB00123;HMDB03406;HMDB00159;HMDB00929;HMDB00574;HMDB00687;HMDB13773;HMDB00177	34 (55)	4.76e-05	0.00351	7.38e-07	9.17e-05
201	Silver	Ag NP-NM300K 24h	Up	Amino Acid interconversion	Wikipathways	0		0 (0)	1	1	12	HMDB00187;HMDB00696;HMDB00719;HMDB00517;HMDB00167;HMDB00168;HMDB00123;HMDB00172;HMDB00159;HMDB00929;HMDB00687;HMDB13773;HMDB00177	36 (51)	1.37e-06	0.000119	1.37e-06	0.000119
202	Silver	Ag NP-NM300K 24h	Up	Tetracycline Action Pathway	SMPDB	0		0 (0)	1	1	7	HMDB00696;HMDB00167;HMDB00168;HMDB03406;HMDB00172;HMDB00687;HMDB13773;HMDB00177	11 (20)	1.7e-06	0.000141	1.7e-06	0.000141
203	Silver	Ag NP-NM300K 24h	Up	Doxycycline Action Pathway	SMPDB	0		0 (0)	1	1	7	HMDB00696;HMDB00167;HMDB00168;HMDB03406;HMDB00172;HMDB00687;HMDB13773;HMDB00177	11 (20)	1.7e-06	0.000141	1.7e-06	0.000141
204	Silver	Ag NP-NM300K 24h	Up	Amino acid and oligopeptide SLC transporters	Reactome	4	ENSG00000151012;ENSG00000111371;ENSG00000131389;ENSG00000134294	22 (51)	0.00289	0.43	10	HMDB00517;HMDB00172;HMDB00168;HMDB00123;HMDB03406;HMDB00159;HMDB00929;HMDB00574;HMDB00687;HMDB13773;HMDB00177	33 (49)	3.54e-05	0.00266	1.75e-06	0.000195
205	Silver	Ag NP-NM300K 24h	Up	Metallothioneins bind metals	Reactome	5	ENSG00000205362;ENSG00000125148;ENSG00000187193;ENSG00000198417;ENSG00000125144	6 (12)	9.42e-08	0.000203	0		0 (4)	1	1	9.42e-08	0.000203
206	Silver	Ag NP-NM300K 24h	Up	Response to metal ions	Reactome	5	ENSG00000205362;ENSG00000125148;ENSG00000187193;ENSG00000198417;ENSG00000125144	6 (12)	9.42e-08	0.000203	0		0 (4)	1	1	9.42e-08	0.000203
207	Silver	Ag NP-NM300K 24h	Up	Na+/Cl- dependent neurotransmitter transporters	Reactome	1	ENSG00000131389	4 (19)	0.107	1	9	HMDB00517;HMDB00168;HMDB00123;HMDB00172;HMDB00159;HMDB00929;HMDB00574;HMDB00687;HMDB13773;HMDB00177	20 (31)	2.1e-06	0.000171	3.66e-06	0.000372
208	Silver	Ag NP-NM300K 24h	Up	Central carbon metabolism in cancer - Homo sapiens (human)	KEGG	1	ENSG00000146648	53 (67)	0.777	1	11	HMDB00187;HMDB00696;HMDB00517;HMDB00168;HMDB00123;HMDB00172;HMDB00159;HMDB00929;HMDB00574;HMDB00687;HMDB13773;HMDB00177	27 (37)	3.96e-07	6.12e-05	4.93e-06	0.000455
209	Silver	Ag NP-NM300K 24h	Up	Cytosolic tRNA aminoacylation	Reactome	1	ENSG00000196305	24 (26)	0.493	1	9	HMDB00517;HMDB00168;HMDB00123;HMDB00172;HMDB00574;HMDB00929;HMDB00159;HMDB00687;HMDB13773;HMDB00177	18 (66)	6.75e-07	6.12e-05	5.3e-06	0.000455
210	Silver	Ag NP-NM300K 24h	Up	tRNA Aminoacylation	Reactome	1	ENSG00000196305	42 (45)	0.696	1	9	HMDB00517;HMDB00168;HMDB00123;HMDB00172;HMDB00159;HMDB00929;HMDB00574;HMDB00687;HMDB13773;HMDB00177	18 (66)	6.75e-07	6.12e-05	7.31e-06	0.000584
211	Silver	Ag NP-NM300K 24h	Up	Mitochondrial tRNA aminoacylation	Reactome	0		21 (23)	1	1	9	HMDB00517;HMDB00168;HMDB00123;HMDB00172;HMDB00159;HMDB00929;HMDB00574;HMDB00687;HMDB13773;HMDB00177	18 (66)	6.75e-07	6.12e-05	1.03e-05	0.000748
212	Silver	Ag NP-NM300K 24h	Up	Amine compound SLC transporters	Reactome	1	ENSG00000131389	8 (30)	0.202	1	9	HMDB00517;HMDB00168;HMDB00123;HMDB00172;HMDB00159;HMDB00929;HMDB00574;HMDB00687;HMDB13773;HMDB00177	21 (35)	3.49e-06	0.000278	1.07e-05	0.000748
213	Silver	Ag NP-NM300K 24h	Up	Amino Acid metabolism	Wikipathways	3	ENSG00000070669;ENSG00000196305;ENSG00000023909	70 (91)	0.309	1	12	HMDB00187;HMDB00696;HMDB00517;HMDB00167;HMDB00168;HMDB00123;HMDB00172;HMDB00574;HMDB00929;HMDB00159;HMDB00687;HMDB13773;HMDB00177	39 (108)	3.7e-06	0.000289	1.68e-05	0.00111
214	Silver	Ag NP-NM300K 24h	Up	mRNA_ protein_ and metabolite inducation pathway by cyclosporin A	Wikipathways	2	ENSG00000151012;ENSG00000128272	6 (6)	0.0108	0.838	5	HMDB00168;HMDB00929;HMDB00172;HMDB00687;HMDB13773;HMDB00167	9 (9)	0.000164	0.0115	2.51e-05	0.00156
215	Silver	Ag NP-NM300K 24h	Up	Gene Expression	Reactome	31	ENSG00000083312;ENSG00000145734;ENSG00000129315;ENSG00000185591;ENSG00000112339;ENSG00000145736;ENSG00000164934;ENSG00000118985;ENSG00000012048;ENSG00000109971;ENSG00000146648;ENSG00000167258;ENSG00000080839;ENSG00000196305;ENSG00000113456;ENSG00000198677;ENSG00000083168;ENSG00000142528;ENSG00000064393;ENSG00000100354;ENSG00000179598;ENSG00000149311;ENSG00000023608;ENSG00000139496;ENSG00000133119…	1495 (1755)	0.977	1	10	HMDB00517;HMDB00168;HMDB00123;HMDB00172;HMDB00159;HMDB00929;HMDB01173;HMDB00574;HMDB00687;HMDB13773;HMDB00177	28 (149)	6.51e-06	0.000499	8.24e-05	0.00485
216	Silver	Ag NP-NM300K 24h	Up	Zinc homeostasis	Wikipathways	7	ENSG00000170385;ENSG00000029364;ENSG00000205362;ENSG00000198417;ENSG00000125144;ENSG00000187193;ENSG00000125148	26 (37)	4.97e-06	0.00715	0		0 (1)	1	1	4.97e-06	0.00715
217	Silver	Ag NP-NM300K 24h	Up	SLC-mediated transmembrane transport	Reactome	11	ENSG00000111371;ENSG00000131389;ENSG00000134294;ENSG00000151012;ENSG00000065923;ENSG00000155850;ENSG00000137491;ENSG00000144136;ENSG00000170385;ENSG00000124789;ENSG00000139496	170 (286)	0.00783	0.704	10	HMDB00517;HMDB00172;HMDB00168;HMDB00123;HMDB03406;HMDB00159;HMDB00929;HMDB00574;HMDB00687;HMDB13773;HMDB00177	52 (173)	0.00222	0.121	0.000208	0.0116
218	Silver	Ag NP-NM300K 24h	Up	Glycine_ serine and threonine metabolism - Homo sapiens (human)	KEGG	1	ENSG00000135069	27 (40)	0.534	1	8	HMDB00187;HMDB04041;HMDB00719;HMDB00167;HMDB00123;HMDB03406;HMDB00574;HMDB00929	22 (50)	5.8e-05	0.0042	0.000353	0.0188
219	Silver	Ag NP-NM300K 24h	Up	Glycine_ serine_ alanine and threonine metabolism	EHMN	4	ENSG00000139496;ENSG00000111371;ENSG00000124789;ENSG00000134294	55 (80)	0.0664	1	8	HMDB00187;HMDB04041;HMDB00696;HMDB00517;HMDB00167;HMDB00168;HMDB00123;HMDB00574	29 (88)	0.000534	0.0311	0.000398	0.0202
220	Silver	Ag NP-NM300K 24h	Up	Glucose Homeostasis	Wikipathways	0		0 (1)	1	1	6	HMDB00696;HMDB00517;HMDB00172;HMDB00159;HMDB00714;HMDB00177	15 (21)	0.000316	0.0214	0.000316	0.0214
221	Silver	Ag NP-NM300K 24h	Up	miR-targeted genes in epithelium - TarBase	Wikipathways	20	ENSG00000135069;ENSG00000163814;ENSG00000111371;ENSG00000146648;ENSG00000085491;ENSG00000134970;ENSG00000134294;ENSG00000138061;ENSG00000110344;ENSG00000065911;ENSG00000102531;ENSG00000178202;ENSG00000072803;ENSG00000006652;ENSG00000039560;ENSG00000160886;ENSG00000198380;ENSG00000164284;ENSG00000001630;ENSG00000100292	258 (330)	3.17e-05	0.0274	0		0 (0)	1	1	3.17e-05	0.0274
222	Silver	Ag NP-NM300K 24h	Up	Trans-sulfuration and one carbon metabolism	Wikipathways	3	ENSG00000135069;ENSG00000023909;ENSG00000065911	28 (31)	0.0419	1	4	HMDB00187;HMDB00123;HMDB00696;HMDB00574	8 (20)	0.00139	0.0769	0.000625	0.0304
223	Silver	Ag NP-NM300K 24h	Up	Transport of glucose and other sugars_ bile salts and organic acids_ metal ions and amine compounds	Reactome	2	ENSG00000170385;ENSG00000131389	54 (106)	0.446	1	9	HMDB00517;HMDB00168;HMDB00123;HMDB00172;HMDB00159;HMDB00929;HMDB00574;HMDB00687;HMDB13773;HMDB00177	31 (85)	0.000141	0.01	0.000672	0.0313
224	Silver	Ag NP-NM300K 24h	Up	Transmembrane transport of small molecules	Reactome	18	ENSG00000065923;ENSG00000081087;ENSG00000111371;ENSG00000131389;ENSG00000134294;ENSG00000100292;ENSG00000151012;ENSG00000114573;ENSG00000155850;ENSG00000137491;ENSG00000144136;ENSG00000072274;ENSG00000170385;ENSG00000124789;ENSG00000107566;ENSG00000185344;ENSG00000139496;ENSG00000104321	373 (628)	0.0161	0.932	10	HMDB00517;HMDB00172;HMDB00168;HMDB00123;HMDB03406;HMDB00159;HMDB00929;HMDB00574;HMDB00687;HMDB13773;HMDB00177	57 (212)	0.00463	0.223	0.000785	0.0351
225	Silver	Ag NP-NM300K 24h	Up	miR-targeted genes in muscle cell - TarBase	Wikipathways	22	ENSG00000111371;ENSG00000085491;ENSG00000134294;ENSG00000138061;ENSG00000110344;ENSG00000135069;ENSG00000006652;ENSG00000146648;ENSG00000065911;ENSG00000167601;ENSG00000001630;ENSG00000134970;ENSG00000100522;ENSG00000102531;ENSG00000039560;ENSG00000164171;ENSG00000100292;ENSG00000178202;ENSG00000163814;ENSG00000151012;ENSG00000198380;ENSG00000164284	315 (398)	6.25e-05	0.045	0		0 (0)	1	1	6.25e-05	0.045
226	Silver	Ag NP-NM300K 24h	Down	PLK1 signaling events	PID	12	ENSG00000112984;ENSG00000101224;ENSG00000158402;ENSG00000087586;ENSG00000105568;ENSG00000105325;ENSG00000149503;ENSG00000166851;ENSG00000136122;ENSG00000134057;ENSG00000088325;ENSG00000117399	44 (44)	8.71e-08	0.000188	0		0 (1)	1	1	8.71e-08	0.000188
227	Silver	Ag NP-NM300K 24h	Down	Aurora B signaling	PID	11	ENSG00000112984;ENSG00000115163;ENSG00000149503;ENSG00000087586;ENSG00000026025;ENSG00000178999;ENSG00000134690;ENSG00000137807;ENSG00000161800;ENSG00000142945;ENSG00000010292	38 (43)	1.55e-07	0.000223	0		0 (2)	1	1	1.55e-07	0.000223
228	Silver	Ag NP-NM300K 24h	Down	Linoleate metabolism	EHMN	11	ENSG00000243135;ENSG00000143819;ENSG00000134824;ENSG00000089057;ENSG00000170482;ENSG00000242515;ENSG00000186204;ENSG00000167600;ENSG00000233276;ENSG00000211445;ENSG00000167468	30 (75)	9.38e-09	4.05e-05	0		8 (24)	1	1	1.83e-07	0.000237
229	Silver	Ag NP-NM300K 24h	Down	Glutathione metabolism	Wikipathways	7	ENSG00000160211;ENSG00000100031;ENSG00000178814;ENSG00000233276;ENSG00000176153;ENSG00000211445;ENSG00000167468	15 (20)	7.29e-07	0.000787	2	HMDB01049;HMDB00148	7 (19)	0.109	1	1.38e-06	0.000897
230	Silver	Ag NP-NM300K 24h	Down	APC/C-mediated degradation of cell cycle proteins	Reactome	10	ENSG00000166851;ENSG00000087586;ENSG00000105325;ENSG00000164611;ENSG00000175063;ENSG00000176248;ENSG00000134057;ENSG00000178999;ENSG00000145386;ENSG00000117399	39 (41)	1.99e-06	0.000983	0		0 (4)	1	1	1.99e-06	0.000983
231	Silver	Ag NP-NM300K 24h	Down	Regulation of mitotic cell cycle	Reactome	10	ENSG00000166851;ENSG00000087586;ENSG00000105325;ENSG00000164611;ENSG00000175063;ENSG00000176248;ENSG00000134057;ENSG00000178999;ENSG00000145386;ENSG00000117399	39 (41)	1.99e-06	0.000983	0		0 (4)	1	1	1.99e-06	0.000983
232	Silver	Ag NP-NM300K 24h	Down	Cell cycle - Homo sapiens (human)	KEGG	17	ENSG00000166508;ENSG00000105173;ENSG00000166851;ENSG00000135476;ENSG00000101224;ENSG00000123080;ENSG00000129355;ENSG00000073111;ENSG00000157456;ENSG00000100297;ENSG00000105325;ENSG00000164611;ENSG00000158402;ENSG00000176248;ENSG00000134057;ENSG00000145386;ENSG00000117399	113 (124)	2.05e-06	0.000983	0		0 (0)	1	1	2.05e-06	0.000983
233	Silver	Ag NP-NM300K 24h	Down	Metapathway biotransformation	Wikipathways	15	ENSG00000243135;ENSG00000088002;ENSG00000197582;ENSG00000128242;ENSG00000196139;ENSG00000187134;ENSG00000151632;ENSG00000242515;ENSG00000186204;ENSG00000143198;ENSG00000167600;ENSG00000143819;ENSG00000176153;ENSG00000211445;ENSG00000167468	91 (177)	2.56e-06	0.00111	0		0 (0)	1	1	2.56e-06	0.00111
234	Silver	Ag NP-NM300K 24h	Down	Selenium Metabolism and Selenoproteins	Wikipathways	9	ENSG00000198843;ENSG00000162430;ENSG00000211450;ENSG00000178980;ENSG00000143416;ENSG00000233276;ENSG00000176153;ENSG00000211445;ENSG00000167468	32 (38)	2.82e-06	0.00111	0		0 (5)	1	1	2.82e-06	0.00111
235	Silver	Ag NP-NM300K 24h	Down	APC/C:Cdh1 mediated degradation of Cdc20 and other APC/C:Cdh1 targeted proteins in late mitosis/early G1	Reactome	8	ENSG00000166851;ENSG00000087586;ENSG00000105325;ENSG00000164611;ENSG00000175063;ENSG00000176248;ENSG00000178999;ENSG00000117399	26 (27)	4.84e-06	0.00161	0		0 (0)	1	1	4.84e-06	0.00161
236	Silver	Ag NP-NM300K 24h	Down	Aurora A signaling	PID	8	ENSG00000101224;ENSG00000087586;ENSG00000013810;ENSG00000115163;ENSG00000105325;ENSG00000126787;ENSG00000178999;ENSG00000088325	31 (31)	2.05e-05	0.00522	0		0 (0)	1	1	2.05e-05	0.00522
237	Silver	Ag NP-NM300K 24h	Down	Cell Cycle_ Mitotic	Reactome	38	ENSG00000112984;ENSG00000234289;ENSG00000105173;ENSG00000087586;ENSG00000123080;ENSG00000129355;ENSG00000105568;ENSG00000188229;ENSG00000164611;ENSG00000137807;ENSG00000115163;ENSG00000149503;ENSG00000072864;ENSG00000157456;ENSG00000137100;ENSG00000075218;ENSG00000175063;ENSG00000176248;ENSG00000152253;ENSG00000088325;ENSG00000131153;ENSG00000188486;ENSG00000073111;ENSG00000100297;ENSG00000166508…	413 (468)	9.74e-07	0.000821	0		6 (29)	1	1	1.45e-05	0.00544
238	Silver	Ag NP-NM300K 24h	Down	Xenobiotics metabolism	EHMN	8	ENSG00000243135;ENSG00000143819;ENSG00000187134;ENSG00000242515;ENSG00000186204;ENSG00000143198;ENSG00000167600;ENSG00000108602	22 (53)	1.14e-06	0.000821	0		3 (93)	1	1	1.67e-05	0.00544
239	Silver	Ag NP-NM300K 24h	Down	Cell Cycle	Wikipathways	14	ENSG00000164611;ENSG00000101224;ENSG00000158402;ENSG00000135476;ENSG00000039068;ENSG00000073111;ENSG00000157456;ENSG00000100297;ENSG00000166508;ENSG00000166851;ENSG00000145386;ENSG00000134057;ENSG00000105173;ENSG00000117399	96 (103)	2.37e-05	0.00561	0		0 (0)	1	1	2.37e-05	0.00561
240	Silver	Ag NP-NM300K 24h	Down	Phosphorylation of Emi1	Reactome	4	ENSG00000134057;ENSG00000166851;ENSG00000117399;ENSG00000105325	6 (6)	3.48e-05	0.00561	0		0 (2)	1	1	3.48e-05	0.00561
241	Silver	Ag NP-NM300K 24h	Down	Kinesins	Reactome	8	ENSG00000112984;ENSG00000161800;ENSG00000167702;ENSG00000137807;ENSG00000237649;ENSG00000079616;ENSG00000142945;ENSG00000186185	35 (43)	5.33e-05	0.00561	0		0 (0)	1	1	5.33e-05	0.00561
242	Silver	Ag NP-NM300K 24h	Down	Urokinase Action Pathway	SMPDB	5	ENSG00000057593;ENSG00000171557;ENSG00000171560;ENSG00000171564;ENSG00000108821	12 (20)	6.11e-05	0.00561	0		0 (4)	1	1	6.11e-05	0.00561
243	Silver	Ag NP-NM300K 24h	Down	Reteplase Action Pathway	SMPDB	5	ENSG00000057593;ENSG00000171557;ENSG00000171560;ENSG00000171564;ENSG00000108821	12 (20)	6.11e-05	0.00561	0		0 (4)	1	1	6.11e-05	0.00561
244	Silver	Ag NP-NM300K 24h	Down	Streptokinase Action Pathway	SMPDB	5	ENSG00000057593;ENSG00000171557;ENSG00000171560;ENSG00000171564;ENSG00000108821	12 (20)	6.11e-05	0.00561	0		0 (4)	1	1	6.11e-05	0.00561
245	Silver	Ag NP-NM300K 24h	Down	Tenecteplase Action Pathway	SMPDB	5	ENSG00000057593;ENSG00000171557;ENSG00000171560;ENSG00000171564;ENSG00000108821	12 (20)	6.11e-05	0.00561	0		0 (4)	1	1	6.11e-05	0.00561
246	Silver	Ag NP-NM300K 24h	Down	Alteplase Action Pathway	SMPDB	5	ENSG00000057593;ENSG00000171557;ENSG00000171560;ENSG00000171564;ENSG00000108821	12 (20)	6.11e-05	0.00561	0		0 (4)	1	1	6.11e-05	0.00561
247	Silver	Ag NP-NM300K 24h	Down	Anistreplase Action Pathway	SMPDB	5	ENSG00000057593;ENSG00000171557;ENSG00000171560;ENSG00000171564;ENSG00000108821	12 (20)	6.11e-05	0.00561	0		0 (4)	1	1	6.11e-05	0.00561
248	Silver	Ag NP-NM300K 24h	Down	Aprotinin Action Pathway	SMPDB	5	ENSG00000057593;ENSG00000171557;ENSG00000171560;ENSG00000171564;ENSG00000108821	12 (20)	6.11e-05	0.00561	0		0 (4)	1	1	6.11e-05	0.00561
249	Silver	Ag NP-NM300K 24h	Down	Phenindione Action Pathway	SMPDB	5	ENSG00000057593;ENSG00000171557;ENSG00000171560;ENSG00000171564;ENSG00000108821	12 (20)	6.11e-05	0.00561	0		0 (5)	1	1	6.11e-05	0.00561
250	Silver	Ag NP-NM300K 24h	Down	Dicoumarol Action Pathway	SMPDB	5	ENSG00000057593;ENSG00000171557;ENSG00000171560;ENSG00000171564;ENSG00000108821	12 (20)	6.11e-05	0.00561	0		0 (5)	1	1	6.11e-05	0.00561
251	Silver	Ag NP-NM300K 24h	Down	Warfarin Action Pathway	SMPDB	5	ENSG00000057593;ENSG00000171557;ENSG00000171560;ENSG00000171564;ENSG00000108821	12 (20)	6.11e-05	0.00561	0		0 (5)	1	1	6.11e-05	0.00561
252	Silver	Ag NP-NM300K 24h	Down	Acenocoumarol Action Pathway	SMPDB	5	ENSG00000057593;ENSG00000171557;ENSG00000171560;ENSG00000171564;ENSG00000108821	12 (20)	6.11e-05	0.00561	0		0 (5)	1	1	6.11e-05	0.00561
253	Silver	Ag NP-NM300K 24h	Down	Coagulation	SMPDB	5	ENSG00000057593;ENSG00000171557;ENSG00000171560;ENSG00000171564;ENSG00000108821	12 (20)	6.11e-05	0.00561	0		0 (4)	1	1	6.11e-05	0.00561
254	Silver	Ag NP-NM300K 24h	Down	Bivalirudin Action Pathway	SMPDB	5	ENSG00000057593;ENSG00000171557;ENSG00000171560;ENSG00000171564;ENSG00000108821	12 (20)	6.11e-05	0.00561	0		0 (4)	1	1	6.11e-05	0.00561
255	Silver	Ag NP-NM300K 24h	Down	Argatroban Action Pathway	SMPDB	5	ENSG00000057593;ENSG00000171557;ENSG00000171560;ENSG00000171564;ENSG00000108821	12 (20)	6.11e-05	0.00561	0		0 (5)	1	1	6.11e-05	0.00561
256	Silver	Ag NP-NM300K 24h	Down	Ardeparin Action Pathway	SMPDB	5	ENSG00000057593;ENSG00000171557;ENSG00000171560;ENSG00000171564;ENSG00000108821	12 (21)	6.11e-05	0.00561	0		0 (4)	1	1	6.11e-05	0.00561
257	Silver	Ag NP-NM300K 24h	Down	Heparin Action Pathway	SMPDB	5	ENSG00000057593;ENSG00000171557;ENSG00000171560;ENSG00000171564;ENSG00000108821	12 (21)	6.11e-05	0.00561	0		0 (5)	1	1	6.11e-05	0.00561
258	Silver	Ag NP-NM300K 24h	Down	Fondaparinux Action Pathway	SMPDB	5	ENSG00000057593;ENSG00000171557;ENSG00000171560;ENSG00000171564;ENSG00000108821	12 (21)	6.11e-05	0.00561	0		0 (5)	1	1	6.11e-05	0.00561
259	Silver	Ag NP-NM300K 24h	Down	Enoxaparin Action Pathway	SMPDB	5	ENSG00000057593;ENSG00000171557;ENSG00000171560;ENSG00000171564;ENSG00000108821	12 (21)	6.11e-05	0.00561	0		0 (4)	1	1	6.11e-05	0.00561
260	Silver	Ag NP-NM300K 24h	Down	Phenprocoumon Action Pathway	SMPDB	5	ENSG00000057593;ENSG00000171557;ENSG00000171560;ENSG00000171564;ENSG00000108821	12 (20)	6.11e-05	0.00561	0		0 (5)	1	1	6.11e-05	0.00561
261	Silver	Ag NP-NM300K 24h	Down	Dicumarol Action Pathway	SMPDB	5	ENSG00000057593;ENSG00000171557;ENSG00000171560;ENSG00000171564;ENSG00000108821	12 (20)	6.11e-05	0.00561	0		0 (5)	1	1	6.11e-05	0.00561
262	Silver	Ag NP-NM300K 24h	Down	Ximelagatran Action Pathway	SMPDB	5	ENSG00000057593;ENSG00000171557;ENSG00000171560;ENSG00000171564;ENSG00000108821	12 (20)	6.11e-05	0.00561	0		0 (5)	1	1	6.11e-05	0.00561
263	Silver	Ag NP-NM300K 24h	Down	Lepirudin Action Pathway	SMPDB	5	ENSG00000057593;ENSG00000171557;ENSG00000171560;ENSG00000171564;ENSG00000108821	12 (20)	6.11e-05	0.00561	0		0 (4)	1	1	6.11e-05	0.00561
264	Silver	Ag NP-NM300K 24h	Down	FOXM1 transcription factor network	PID	8	ENSG00000101224;ENSG00000166851;ENSG00000157456;ENSG00000115163;ENSG00000145386;ENSG00000134057;ENSG00000178999;ENSG00000105173	36 (43)	6.62e-05	0.00583	0		0 (0)	1	1	6.62e-05	0.00583
265	Silver	Ag NP-NM300K 24h	Down	Benzo(a)pyrene metabolism	Wikipathways	4	ENSG00000196139;ENSG00000143819;ENSG00000187134;ENSG00000151632	7 (9)	7.86e-05	0.00679	0		0 (5)	1	1	7.86e-05	0.00679
266	Silver	Ag NP-NM300K 24h	Down	Glutathione metabolism - Homo sapiens (human)	KEGG	9	ENSG00000171848;ENSG00000143198;ENSG00000160211;ENSG00000100031;ENSG00000178814;ENSG00000233276;ENSG00000176153;ENSG00000211445;ENSG00000167468	38 (54)	1.32e-05	0.00357	2	HMDB01049;HMDB00148	10 (38)	0.2	1	3.66e-05	0.00952
267	Silver	Ag NP-NM300K 24h	Down	Cell Cycle	Reactome	41	ENSG00000112984;ENSG00000234289;ENSG00000105173;ENSG00000087586;ENSG00000123080;ENSG00000129355;ENSG00000105568;ENSG00000105325;ENSG00000164611;ENSG00000137807;ENSG00000131153;ENSG00000115163;ENSG00000149503;ENSG00000072864;ENSG00000157456;ENSG00000137100;ENSG00000075218;ENSG00000175063;ENSG00000176248;ENSG00000123485;ENSG00000152253;ENSG00000088325;ENSG00000104147;ENSG00000188486;ENSG00000073111…	488 (551)	3.7e-06	0.00133	0		6 (32)	1	1	5e-05	0.0108
268	Silver	Ag NP-NM300K 24h	Down	Activation of APC/C and APC/C:Cdc20 mediated degradation of mitotic proteins	Reactome	7	ENSG00000166851;ENSG00000164611;ENSG00000175063;ENSG00000176248;ENSG00000134057;ENSG00000145386;ENSG00000117399	30 (32)	0.000137	0.0114	0		0 (0)	1	1	0.000137	0.0114
269	Silver	Ag NP-NM300K 24h	Down	Cell Cycle Checkpoints	Reactome	15	ENSG00000234289;ENSG00000105173;ENSG00000158402;ENSG00000188486;ENSG00000073111;ENSG00000157456;ENSG00000100297;ENSG00000171792;ENSG00000166508;ENSG00000075218;ENSG00000175063;ENSG00000145386;ENSG00000134057;ENSG00000176248;ENSG00000117399	131 (158)	0.00021	0.0168	0		0 (3)	1	1	0.00021	0.0168
270	Silver	Ag NP-NM300K 24h	Down	Separation of Sister Chromatids	Reactome	14	ENSG00000115163;ENSG00000149503;ENSG00000072864;ENSG00000134690;ENSG00000142945;ENSG00000105568;ENSG00000164611;ENSG00000166851;ENSG00000175063;ENSG00000135476;ENSG00000176248;ENSG00000178999;ENSG00000152253;ENSG00000117399	119 (124)	0.000256	0.0198	0		0 (2)	1	1	0.000256	0.0198
271	Silver	Ag NP-NM300K 24h	Down	Selenium Micronutrient Network	Wikipathways	11	ENSG00000198843;ENSG00000162430;ENSG00000211450;ENSG00000057593;ENSG00000178980;ENSG00000073060;ENSG00000100031;ENSG00000233276;ENSG00000176153;ENSG00000211445;ENSG00000167468	56 (83)	1.01e-05	0.00308	0		14 (106)	1	1	0.000126	0.0216
272	Silver	Ag NP-NM300K 24h	Down	Cyclin A/B1 associated events during G2/M transition	Reactome	7	ENSG00000101224;ENSG00000158402;ENSG00000157456;ENSG00000105568;ENSG00000166851;ENSG00000145386;ENSG00000134057	21 (22)	1.07e-05	0.00308	0		1 (4)	1	1	0.000133	0.0216
273	Silver	Ag NP-NM300K 24h	Down	Regulation of APC/C activators between G1/S and early anaphase	Reactome	7	ENSG00000166851;ENSG00000105325;ENSG00000175063;ENSG00000176248;ENSG00000134057;ENSG00000145386;ENSG00000117399	34 (36)	0.000317	0.024	0		0 (2)	1	1	0.000317	0.024
274	Silver	Ag NP-NM300K 24h	Down	Beta3 integrin cell surface interactions	PID	7	ENSG00000171560;ENSG00000171564;ENSG00000120708;ENSG00000109072;ENSG00000171557;ENSG00000108821;ENSG00000115414	35 (43)	0.000382	0.0275	0		0 (3)	1	1	0.000382	0.0275
275	Silver	Ag NP-NM300K 24h	Down	Beta1 integrin cell surface interactions	PID	8	ENSG00000171560;ENSG00000171564;ENSG00000120708;ENSG00000182871;ENSG00000109072;ENSG00000171557;ENSG00000108821;ENSG00000115414	48 (70)	0.000544	0.0385	0		0 (2)	1	1	0.000544	0.0385
276	Silver	Ag NP-NM300K 24h	Down	role of ran in mitotic spindle regulation	BioCarta	4	ENSG00000180198;ENSG00000182481;ENSG00000087586;ENSG00000088325	11 (11)	0.000653	0.0403	0		0 (2)	1	1	0.000653	0.0403
277	Silver	Ag NP-NM300K 24h	Down	extrinsic prothrombin activation pathway	BioCarta	4	ENSG00000057593;ENSG00000171557;ENSG00000171560;ENSG00000171564	11 (13)	0.000653	0.0403	0		0 (3)	1	1	0.000653	0.0403
278	Silver	Ag NP-NM300K 24h	Down	The role of GTSE1 in G2/M progression after G2 checkpoint	Reactome	4	ENSG00000075218;ENSG00000134057;ENSG00000166851;ENSG00000157456	11 (11)	0.000653	0.0403	0		0 (2)	1	1	0.000653	0.0403
279	Silver	Ag NP-NM300K 24h	Down	Metabolism of xenobiotics by cytochrome P450 - Homo sapiens (human)	KEGG	8	ENSG00000143198;ENSG00000143819;ENSG00000187134;ENSG00000242515;ENSG00000242366;ENSG00000243135;ENSG00000167600;ENSG00000108602	32 (74)	2.64e-05	0.00561	0		4 (121)	1	1	0.000305	0.044
280	Silver	Ag NP-NM300K 24h	Down	APC/C:Cdc20 mediated degradation of mitotic proteins	Reactome	6	ENSG00000164611;ENSG00000175063;ENSG00000176248;ENSG00000134057;ENSG00000145386;ENSG00000117399	29 (31)	0.000832	0.0479	0		0 (0)	1	1	0.000832	0.0479
281	Silver	Ag MP 01h	Up	none statistically significant at q<0.05
282	Silver	Ag MP 01h	Down	Dengue-2 Interactions with Complement and Coagulation Cascades	Wikipathways	4	ENSG00000122861;ENSG00000159403;ENSG00000125730;ENSG00000106366	33 (60)	1.63e-05	0.0352
283	Silver	Ag MP 01h	Down	Complement and Coagulation Cascades	Wikipathways	4	ENSG00000122861;ENSG00000159403;ENSG00000125730;ENSG00000106366	33 (59)	1.63e-05	0.0352
284	Silver	Ag MP 06h	Up	Metallothioneins bind metals	Reactome	6	ENSG00000205362;ENSG00000169688;ENSG00000198417;ENSG00000125144;ENSG00000187193;ENSG00000125148	6 (12)	2.22e-18	4.79e-15	0		0 (4)	1	1	2.22e-18	4.79e-15
285	Silver	Ag MP 06h	Up	Response to metal ions	Reactome	6	ENSG00000205362;ENSG00000169688;ENSG00000198417;ENSG00000125144;ENSG00000187193;ENSG00000125148	6 (12)	2.22e-18	4.79e-15	0		0 (4)	1	1	2.22e-18	4.79e-15
286	Silver	Ag MP 06h	Up	Zinc homeostasis	Wikipathways	6	ENSG00000205362;ENSG00000169688;ENSG00000198417;ENSG00000125144;ENSG00000187193;ENSG00000125148	26 (37)	5.04e-13	7.26e-10	0		0 (1)	1	1	5.04e-13	7.26e-10
287	Silver	Ag MP 06h	Up	Copper homeostasis	Wikipathways	6	ENSG00000205362;ENSG00000169688;ENSG00000198417;ENSG00000125144;ENSG00000187193;ENSG00000125148	45 (55)	1.76e-11	1.52e-08	0		0 (2)	1	1	1.76e-11	1.52e-08
288	Silver	Ag MP 06h	Up	Mineral absorption - Homo sapiens (human)	KEGG	6	ENSG00000205362;ENSG00000169688;ENSG00000198417;ENSG00000125144;ENSG00000187193;ENSG00000125148	33 (52)	2.41e-12	2.61e-09	0		15 (29)	1	1	6.7e-11	2.87e-08
289	Silver	Ag MP 06h	Up	Metabolism	Reactome	9	ENSG00000205362;ENSG00000114770;ENSG00000169688;ENSG00000198417;ENSG00000125144;ENSG00000187193;ENSG00000125148;ENSG00000019186;ENSG00000070669	1505 (2035)	3.02e-05	0.0218	3	HMDB00078;HMDB00574;HMDB00208	159 (1265)	0.407	1	0.000152	0.0325
290	Silver	Ag MP 06h	Down	Complement and coagulation cascades - Homo sapiens (human)	KEGG	4	ENSG00000178726;ENSG00000168398;ENSG00000159403;ENSG00000106366	43 (79)	1.5e-06	0.00646	0		0 (2)	1	1	1.5e-06	0.00646
291	Silver	Ag MP 06h	Down	Validated transcriptional targets of AP1 family members Fra1 and Fra2	PID	3	ENSG00000178726;ENSG00000177606;ENSG00000175592	27 (38)	2.11e-05	0.0304	0		0 (2)	1	1	2.11e-05	0.0304
292	Silver	Ag MP 06h	Down	Dengue-2 Interactions with Complement and Coagulation Cascades	Wikipathways	3	ENSG00000178726;ENSG00000159403;ENSG00000106366	33 (60)	3.91e-05	0.0338	0		0 (2)	1	1	3.91e-05	0.0338
293	Silver	Ag MP 06h	Down	Complement and Coagulation Cascades	Wikipathways	3	ENSG00000178726;ENSG00000159403;ENSG00000106366	33 (59)	3.91e-05	0.0338	0		0 (2)	1	1	3.91e-05	0.0338
294	Silver	Ag MP 24h	Up	Metallothioneins bind metals	Reactome	4	ENSG00000205362;ENSG00000125148;ENSG00000187193;ENSG00000198417	6 (12)	5.61e-12	1.21e-08	0		0 (4)	1	1	5.61e-12	1.21e-08
295	Silver	Ag MP 24h	Up	Response to metal ions	Reactome	4	ENSG00000205362;ENSG00000125148;ENSG00000187193;ENSG00000198417	6 (12)	5.61e-12	1.21e-08	0		0 (4)	1	1	5.61e-12	1.21e-08
296	Silver	Ag MP 24h	Up	Zinc homeostasis	Wikipathways	4	ENSG00000205362;ENSG00000125148;ENSG00000187193;ENSG00000198417	26 (37)	5.55e-09	7.99e-06	0		0 (1)	1	1	5.55e-09	7.99e-06
297	Silver	Ag MP 24h	Up	Copper homeostasis	Wikipathways	4	ENSG00000205362;ENSG00000125148;ENSG00000187193;ENSG00000198417	45 (55)	5.49e-08	4.74e-05	0		0 (2)	1	1	5.49e-08	4.74e-05
298	Silver	Ag MP 24h	Up	Mineral absorption - Homo sapiens (human)	KEGG	4	ENSG00000205362;ENSG00000198417;ENSG00000125148;ENSG00000187193	33 (52)	1.52e-08	1.64e-05	0		15 (29)	1	1	2.88e-07	0.000103
299	Silver	Ag MP 24h	Up	Platinum Pathway_ Pharmacokinetics/Pharmacodynamics	PharmGKB	2	ENSG00000205362;ENSG00000125148	10 (13)	3.75e-05	0.027	0		0 (0)	1	1	3.75e-05	0.027
300	Silver	Ag MP 24h	Down	none statistically significant at q<0.05
301	Silver	Ag+ 01h	Up	Transcriptional regulation of white adipocyte differentiation	Wikipathways	2	ENSG00000172216;ENSG00000221869	7 (15)	0.000723	0.162	4	HMDB04670;HMDB00673;HMDB04667;HMDB00220	4 (9)	9.63e-05	0.096	1.22e-06	0.000721
302	Silver	Ag+ 01h	Up	Linoleic acid metabolism - Homo sapiens (human)	KEGG	0		7 (29)	1	1	6	HMDB04670;HMDB04667;HMDB03797;HMDB04701;HMDB04702;HMDB00673	7 (28)	5.44e-06	0.0217	7.13e-05	0.0211
303	Silver	Ag+ 01h	Up	ATF-2 transcription factor network	PID	5	ENSG00000120129;ENSG00000184557;ENSG00000162772;ENSG00000177606;ENSG00000175197	44 (61)	5.68e-06	0.0233	0		0 (3)	1	1	5.68e-06	0.0233
304	Silver	Ag+ 01h	Up	White fat cell differentiation	Wikipathways	4	ENSG00000175197;ENSG00000172216;ENSG00000221869;ENSG00000127528	25 (32)	1.31e-05	0.0233	0		0 (2)	1	1	1.31e-05	0.0233
305	Silver	Ag+ 01h	Up	Adipogenesis	Wikipathways	6	ENSG00000067082;ENSG00000099194;ENSG00000175197;ENSG00000172216;ENSG00000221869;ENSG00000184557	92 (131)	1.62e-05	0.0233	0		0 (0)	1	1	1.62e-05	0.0233
306	Silver	Ag+ 01h	Up	Preimplantation Embryo	Wikipathways	4	ENSG00000175197;ENSG00000128016;ENSG00000185697;ENSG00000125740	33 (59)	4.08e-05	0.0418	0		0 (0)	1	1	4.08e-05	0.0418
307	Silver	Ag+ 01h	Up	IL4-mediated signaling events	PID	4	ENSG00000172216;ENSG00000185697;ENSG00000108821;ENSG00000184557	35 (65)	5.18e-05	0.0418	0		0 (9)	1	1	5.18e-05	0.0418
308	Silver	Ag+ 01h	Up	Tacrolimus/Cyclosporine Pathway_ Pharmacodynamics	PharmGKB	4	ENSG00000125740;ENSG00000162772;ENSG00000177606;ENSG00000198517	36 (44)	5.8e-05	0.0418	0		0 (2)	1	1	5.8e-05	0.0418
309	Silver	Ag+ 01h	Up	IL6-mediated signaling events	PID	4	ENSG00000172216;ENSG00000221869;ENSG00000177606;ENSG00000184557	40 (48)	8.84e-05	0.0477	0		0 (2)	1	1	8.84e-05	0.0477
310	Silver	Ag+ 01h	Down	Amino Acid interconversion	Wikipathways	0		0 (0)	1	1	19	HMDB00056;HMDB00187;HMDB00162;HMDB00696;HMDB00719;HMDB00167;HMDB00725;HMDB00168;HMDB00272;HMDB01721;HMDB00172;HMDB00159;HMDB00929;HMDB00158;HMDB00148;HMDB00177;HMDB00161;HMDB00271;HMDB00687;HMDB13773;HMDB00251	36 (51)	1.87e-09	7.03e-06	1.87e-09	7.03e-06
311	Silver	Ag+ 01h	Down	Transport of inorganic cations-anions and amino acids-oligopeptides	Wikipathways	0		0 (0)	1	1	18	HMDB00056;HMDB00187;HMDB00162;HMDB00696;HMDB00251;HMDB00167;HMDB03406;HMDB00168;HMDB00172;HMDB00159;HMDB00929;HMDB06055;HMDB00158;HMDB00148;HMDB01310;HMDB00161;HMDB00687;HMDB13773;HMDB00177	37 (51)	3.14e-08	7.03e-06	3.14e-08	7.03e-06
312	Silver	Ag+ 01h	Down	Roxithromycin Action Pathway	SMPDB	0		0 (0)	1	1	9	HMDB00162;HMDB00696;HMDB00167;HMDB00168;HMDB03406;HMDB00172;HMDB00161;HMDB00687;HMDB13773;HMDB00177	10 (20)	5.82e-08	7.03e-06	5.82e-08	7.03e-06
313	Silver	Ag+ 01h	Down	Josamycin Action Pathway	SMPDB	0		0 (0)	1	1	9	HMDB00162;HMDB00696;HMDB00167;HMDB00168;HMDB03406;HMDB00172;HMDB00161;HMDB00687;HMDB13773;HMDB00177	10 (20)	5.82e-08	7.03e-06	5.82e-08	7.03e-06
314	Silver	Ag+ 01h	Down	Tigecycline Action Pathway	SMPDB	0		0 (0)	1	1	9	HMDB00162;HMDB00696;HMDB00167;HMDB00168;HMDB03406;HMDB00172;HMDB00161;HMDB00687;HMDB13773;HMDB00177	10 (20)	5.82e-08	7.03e-06	5.82e-08	7.03e-06
315	Silver	Ag+ 01h	Down	Arbekacin Action Pathway	SMPDB	0		0 (0)	1	1	9	HMDB00162;HMDB00696;HMDB00167;HMDB00168;HMDB03406;HMDB00172;HMDB00161;HMDB00687;HMDB13773;HMDB00177	10 (20)	5.82e-08	7.03e-06	5.82e-08	7.03e-06
316	Silver	Ag+ 01h	Down	Paromomycin Action Pathway	SMPDB	0		0 (0)	1	1	9	HMDB00162;HMDB00696;HMDB00167;HMDB00168;HMDB03406;HMDB00172;HMDB00161;HMDB00687;HMDB13773;HMDB00177	10 (20)	5.82e-08	7.03e-06	5.82e-08	7.03e-06
317	Silver	Ag+ 01h	Down	Oxytetracycline Action Pathway	SMPDB	0		0 (0)	1	1	9	HMDB00162;HMDB00696;HMDB00167;HMDB00168;HMDB03406;HMDB00172;HMDB00161;HMDB00687;HMDB13773;HMDB00177	10 (20)	5.82e-08	7.03e-06	5.82e-08	7.03e-06
318	Silver	Ag+ 01h	Down	Clomocycline Action Pathway	SMPDB	0		0 (0)	1	1	9	HMDB00162;HMDB00696;HMDB00167;HMDB00168;HMDB03406;HMDB00172;HMDB00161;HMDB00687;HMDB13773;HMDB00177	10 (20)	5.82e-08	7.03e-06	5.82e-08	7.03e-06
319	Silver	Ag+ 01h	Down	Demeclocycline Action Pathway	SMPDB	0		0 (0)	1	1	9	HMDB00162;HMDB00696;HMDB00167;HMDB00168;HMDB03406;HMDB00172;HMDB00161;HMDB00687;HMDB13773;HMDB00177	10 (20)	5.82e-08	7.03e-06	5.82e-08	7.03e-06
320	Silver	Ag+ 01h	Down	Methacycline Action Pathway	SMPDB	0		0 (0)	1	1	9	HMDB00162;HMDB00696;HMDB00167;HMDB00168;HMDB03406;HMDB00172;HMDB00161;HMDB00687;HMDB13773;HMDB00177	10 (20)	5.82e-08	7.03e-06	5.82e-08	7.03e-06
321	Silver	Ag+ 01h	Down	Rolitetracycline Action Pathway	SMPDB	0		0 (0)	1	1	9	HMDB00162;HMDB00696;HMDB00167;HMDB00168;HMDB03406;HMDB00172;HMDB00161;HMDB00687;HMDB13773;HMDB00177	10 (20)	5.82e-08	7.03e-06	5.82e-08	7.03e-06
322	Silver	Ag+ 01h	Down	Spectinomycin Action Pathway	SMPDB	0		0 (0)	1	1	9	HMDB00162;HMDB00696;HMDB00167;HMDB00168;HMDB03406;HMDB00172;HMDB00161;HMDB00687;HMDB13773;HMDB00177	10 (20)	5.82e-08	7.03e-06	5.82e-08	7.03e-06
323	Silver	Ag+ 01h	Down	Kanamycin Action Pathway	SMPDB	0		0 (0)	1	1	9	HMDB00162;HMDB00696;HMDB00167;HMDB00168;HMDB03406;HMDB00172;HMDB00161;HMDB00687;HMDB13773;HMDB00177	10 (20)	5.82e-08	7.03e-06	5.82e-08	7.03e-06
324	Silver	Ag+ 01h	Down	Gentamicin Action Pathway	SMPDB	0		0 (0)	1	1	9	HMDB00162;HMDB00696;HMDB00167;HMDB00168;HMDB03406;HMDB00172;HMDB00161;HMDB00687;HMDB13773;HMDB00177	10 (20)	5.82e-08	7.03e-06	5.82e-08	7.03e-06
325	Silver	Ag+ 01h	Down	Netilmicin Action Pathway	SMPDB	0		0 (0)	1	1	9	HMDB00162;HMDB00696;HMDB00167;HMDB00168;HMDB03406;HMDB00172;HMDB00161;HMDB00687;HMDB13773;HMDB00177	10 (20)	5.82e-08	7.03e-06	5.82e-08	7.03e-06
326	Silver	Ag+ 01h	Down	Neomycin Action Pathway	SMPDB	0		0 (0)	1	1	9	HMDB00162;HMDB00696;HMDB00167;HMDB00168;HMDB03406;HMDB00172;HMDB00161;HMDB00687;HMDB13773;HMDB00177	10 (20)	5.82e-08	7.03e-06	5.82e-08	7.03e-06
327	Silver	Ag+ 01h	Down	Erythromycin Action Pathway	SMPDB	0		0 (0)	1	1	9	HMDB00162;HMDB00696;HMDB00167;HMDB00168;HMDB03406;HMDB00172;HMDB00161;HMDB00687;HMDB13773;HMDB00177	10 (20)	5.82e-08	7.03e-06	5.82e-08	7.03e-06
328	Silver	Ag+ 01h	Down	Amikacin Action Pathway	SMPDB	0		0 (0)	1	1	9	HMDB00162;HMDB00696;HMDB00167;HMDB00168;HMDB03406;HMDB00172;HMDB00161;HMDB00687;HMDB13773;HMDB00177	10 (20)	5.82e-08	7.03e-06	5.82e-08	7.03e-06
329	Silver	Ag+ 01h	Down	Telithromycin Action Pathway	SMPDB	0		0 (0)	1	1	9	HMDB00162;HMDB00696;HMDB00167;HMDB00168;HMDB03406;HMDB00172;HMDB00161;HMDB00687;HMDB13773;HMDB00177	10 (20)	5.82e-08	7.03e-06	5.82e-08	7.03e-06
330	Silver	Ag+ 01h	Down	Lymecycline Action Pathway	SMPDB	0		0 (0)	1	1	9	HMDB00162;HMDB00696;HMDB00167;HMDB00168;HMDB03406;HMDB00172;HMDB00161;HMDB00687;HMDB13773;HMDB00177	10 (20)	5.82e-08	7.03e-06	5.82e-08	7.03e-06
331	Silver	Ag+ 01h	Down	Chloramphenicol Action Pathway	SMPDB	0		0 (0)	1	1	9	HMDB00162;HMDB00696;HMDB00167;HMDB00168;HMDB03406;HMDB00172;HMDB00161;HMDB00687;HMDB13773;HMDB00177	10 (20)	5.82e-08	7.03e-06	5.82e-08	7.03e-06
332	Silver	Ag+ 01h	Down	Azithromycin Action Pathway	SMPDB	0		0 (0)	1	1	9	HMDB00162;HMDB00696;HMDB00167;HMDB00168;HMDB03406;HMDB00172;HMDB00161;HMDB00687;HMDB13773;HMDB00177	10 (20)	5.82e-08	7.03e-06	5.82e-08	7.03e-06
333	Silver	Ag+ 01h	Down	Troleandomycin Action Pathway	SMPDB	0		0 (0)	1	1	9	HMDB00162;HMDB00696;HMDB00167;HMDB00168;HMDB03406;HMDB00172;HMDB00161;HMDB00687;HMDB13773;HMDB00177	10 (20)	5.82e-08	7.03e-06	5.82e-08	7.03e-06
334	Silver	Ag+ 01h	Down	Clindamycin Action Pathway	SMPDB	0		0 (0)	1	1	9	HMDB00162;HMDB00696;HMDB00167;HMDB00168;HMDB03406;HMDB00172;HMDB00161;HMDB00687;HMDB13773;HMDB00177	10 (20)	5.82e-08	7.03e-06	5.82e-08	7.03e-06
335	Silver	Ag+ 01h	Down	Streptomycin Action Pathway	SMPDB	0		0 (0)	1	1	9	HMDB00162;HMDB00696;HMDB00167;HMDB00168;HMDB03406;HMDB00172;HMDB00161;HMDB00687;HMDB13773;HMDB00177	10 (20)	5.82e-08	7.03e-06	5.82e-08	7.03e-06
336	Silver	Ag+ 01h	Down	Clarithromycin Action Pathway	SMPDB	0		0 (0)	1	1	9	HMDB00162;HMDB00696;HMDB00167;HMDB00168;HMDB03406;HMDB00172;HMDB00161;HMDB00687;HMDB13773;HMDB00177	10 (20)	5.82e-08	7.03e-06	5.82e-08	7.03e-06
337	Silver	Ag+ 01h	Down	Tobramycin Action Pathway	SMPDB	0		0 (0)	1	1	9	HMDB00162;HMDB00696;HMDB00167;HMDB00168;HMDB03406;HMDB00172;HMDB00161;HMDB00687;HMDB13773;HMDB00177	10 (20)	5.82e-08	7.03e-06	5.82e-08	7.03e-06
338	Silver	Ag+ 01h	Down	Lincomycin Action Pathway	SMPDB	0		0 (0)	1	1	9	HMDB00162;HMDB00696;HMDB00167;HMDB00168;HMDB03406;HMDB00172;HMDB00161;HMDB00687;HMDB13773;HMDB00177	10 (20)	5.82e-08	7.03e-06	5.82e-08	7.03e-06
339	Silver	Ag+ 01h	Down	Minocycline Action Pathway	SMPDB	0		0 (0)	1	1	9	HMDB00162;HMDB00696;HMDB00167;HMDB00168;HMDB03406;HMDB00172;HMDB00161;HMDB00687;HMDB13773;HMDB00177	10 (20)	5.82e-08	7.03e-06	5.82e-08	7.03e-06
340	Silver	Ag+ 01h	Down	Aminoacyl-tRNA biosynthesis - Homo sapiens (human)	KEGG	2	ENSG00000134905;ENSG00000247626	46 (66)	0.0285	0.672	14	HMDB00187;HMDB00162;HMDB00696;HMDB00167;HMDB00168;HMDB00272;HMDB01721;HMDB00172;HMDB00159;HMDB00929;HMDB00158;HMDB00148;HMDB00161;HMDB00687;HMDB13773;HMDB00177	22 (52)	1.48e-08	7.03e-06	9.54e-09	7.28e-06
341	Silver	Ag+ 01h	Down	tRNA charging	HumanCyc	2	ENSG00000134905;ENSG00000247626	38 (41)	0.0199	0.62	13	HMDB00187;HMDB00162;HMDB00696;HMDB00167;HMDB00168;HMDB00172;HMDB00148;HMDB00159;HMDB00929;HMDB00158;HMDB00161;HMDB00687;HMDB13773;HMDB00177	20 (24)	3.71e-08	7.03e-06	1.63e-08	7.28e-06
342	Silver	Ag+ 01h	Down	Class I MHC mediated antigen processing & presentation	Wikipathways	0		0 (0)	1	1	13	HMDB00187;HMDB00162;HMDB00696;HMDB00167;HMDB00168;HMDB00172;HMDB00159;HMDB00929;HMDB00158;HMDB00148;HMDB00161;HMDB00687;HMDB13773;HMDB00177	21 (35)	8.76e-08	9.98e-06	8.76e-08	9.98e-06
343	Silver	Ag+ 01h	Down	tRNA Aminoacylation	Wikipathways	0		0 (0)	1	1	13	HMDB00187;HMDB00162;HMDB00696;HMDB00167;HMDB00168;HMDB00172;HMDB00159;HMDB00929;HMDB00158;HMDB00148;HMDB00161;HMDB00687;HMDB13773;HMDB00177	21 (26)	8.76e-08	9.98e-06	8.76e-08	9.98e-06
344	Silver	Ag+ 01h	Down	Tetracycline Action Pathway	SMPDB	0		0 (0)	1	1	9	HMDB00162;HMDB00696;HMDB00167;HMDB00168;HMDB03406;HMDB00172;HMDB00161;HMDB00687;HMDB13773;HMDB00177	11 (20)	2.87e-07	3.01e-05	2.87e-07	3.01e-05
345	Silver	Ag+ 01h	Down	Doxycycline Action Pathway	SMPDB	0		0 (0)	1	1	9	HMDB00162;HMDB00696;HMDB00167;HMDB00168;HMDB03406;HMDB00172;HMDB00161;HMDB00687;HMDB13773;HMDB00177	11 (20)	2.87e-07	3.01e-05	2.87e-07	3.01e-05
346	Silver	Ag+ 01h	Down	Amino acid transport across the plasma membrane	Reactome	0		17 (31)	1	1	15	HMDB00056;HMDB00162;HMDB00251;HMDB00168;HMDB00172;HMDB03406;HMDB00159;HMDB00929;HMDB06055;HMDB00158;HMDB00148;HMDB01310;HMDB00161;HMDB00687;HMDB13773;HMDB00177	24 (32)	5.81e-09	7.03e-06	1.16e-07	3.46e-05
347	Silver	Ag+ 01h	Down	Transport of glucose and other sugars_ bile salts and organic acids_ metal ions and amine compounds	Wikipathways	0		0 (0)	1	1	16	HMDB00094;HMDB00187;HMDB00162;HMDB00696;HMDB00251;HMDB00167;HMDB00168;HMDB00172;HMDB00159;HMDB00929;HMDB06055;HMDB00158;HMDB00056;HMDB00161;HMDB00687;HMDB13773;HMDB00177	34 (83)	4.08e-07	4.06e-05	4.08e-07	4.06e-05
348	Silver	Ag+ 01h	Down	Biochemical Pathways Part I	Wikipathways	0		0 (0)	1	1	35	HMDB00094;HMDB00696;HMDB00251;HMDB00168;HMDB00172;HMDB00159;HMDB00929;HMDB03411;HMDB00719;HMDB00167;HMDB03011;HMDB06272;HMDB00158;HMDB00026;HMDB00291;HMDB00206;HMDB00161;HMDB00271;HMDB00734;HMDB00687;HMDB13773;HMDB00187;HMDB00247;HMDB00162;HMDB00965;HMDB00148;HMDB01874;HMDB06556;HMDB01149;HMDB00210;HMDB00056;HMDB06055;HMDB02104;HMDB00272;HMDB01721;HMDB05971;HMDB06511;HMDB00177	135 (467)	6.93e-07	6.43e-05	6.93e-07	6.43e-05
349	Silver	Ag+ 01h	Down	Mitochondrial tRNA aminoacylation	Reactome	2	ENSG00000134905;ENSG00000247626	21 (23)	0.00632	0.408	10	HMDB00162;HMDB00168;HMDB00172;HMDB00148;HMDB00159;HMDB00929;HMDB00158;HMDB00161;HMDB00687;HMDB13773;HMDB00177	18 (66)	1.37e-05	0.000997	1.49e-06	0.000334
350	Silver	Ag+ 01h	Down	Central carbon metabolism in cancer - Homo sapiens (human)	KEGG	1	ENSG00000136997	53 (67)	0.264	1	14	HMDB00094;HMDB00187;HMDB00162;HMDB00696;HMDB00168;HMDB00172;HMDB00148;HMDB00159;HMDB00929;HMDB00193;HMDB00158;HMDB00161;HMDB00687;HMDB13773;HMDB00177	27 (37)	5.52e-07	5.24e-05	2.44e-06	0.000437
351	Silver	Ag+ 01h	Down	leukotriene biosynthesis	HumanCyc	0		1 (5)	1	1	13	HMDB00187;HMDB00162;HMDB00696;HMDB00167;HMDB00168;HMDB00172;HMDB00148;HMDB00159;HMDB00929;HMDB00158;HMDB00161;HMDB00687;HMDB13773;HMDB00177	22 (30)	1.93e-07	2.13e-05	3.17e-06	0.000474
352	Silver	Ag+ 01h	Down	tRNA Aminoacylation	Reactome	2	ENSG00000134905;ENSG00000247626	42 (45)	0.024	0.644	10	HMDB00162;HMDB00168;HMDB00172;HMDB00148;HMDB00159;HMDB00929;HMDB00158;HMDB00161;HMDB00687;HMDB13773;HMDB00177	18 (66)	1.37e-05	0.000997	5.22e-06	0.000669
353	Silver	Ag+ 01h	Down	<i>S</i>-methyl-5-thio-&alpha;-D-ribose 1-phosphate degradation	HumanCyc	0		4 (4)	1	1	13	HMDB00187;HMDB00162;HMDB00696;HMDB00167;HMDB00168;HMDB00172;HMDB00148;HMDB00159;HMDB00929;HMDB00158;HMDB00161;HMDB00687;HMDB13773;HMDB00177	23 (35)	3.99e-07	4.06e-05	6.27e-06	0.000703
354	Silver	Ag+ 01h	Down	Na+/Cl- dependent neurotransmitter transporters	Reactome	0		4 (19)	1	1	12	HMDB00056;HMDB00162;HMDB00251;HMDB00168;HMDB00172;HMDB00159;HMDB00929;HMDB06055;HMDB00158;HMDB00161;HMDB00687;HMDB13773;HMDB00177	20 (31)	4.95e-07	4.81e-05	7.68e-06	0.000764
355	Silver	Ag+ 01h	Down	Amine compound SLC transporters	Reactome	0		8 (30)	1	1	12	HMDB00056;HMDB00162;HMDB00251;HMDB00168;HMDB00172;HMDB00159;HMDB00929;HMDB06055;HMDB00158;HMDB00161;HMDB00687;HMDB13773;HMDB00177	21 (35)	1.04e-06	9.4e-05	1.53e-05	0.00137
356	Silver	Ag+ 01h	Down	Mineral absorption - Homo sapiens (human)	KEGG	0		33 (52)	1	1	10	HMDB00187;HMDB00162;HMDB00696;HMDB00167;HMDB00168;HMDB00172;HMDB00159;HMDB00929;HMDB00161;HMDB00687;HMDB13773	15 (29)	1.3e-06	0.000115	1.89e-05	0.0015
357	Silver	Ag+ 01h	Down	Amino Acid metabolism	Wikipathways	1	ENSG00000247626	70 (91)	0.333	1	16	HMDB00094;HMDB00187;HMDB00162;HMDB00696;HMDB00167;HMDB00725;HMDB00168;HMDB00172;HMDB00159;HMDB00929;HMDB00193;HMDB00158;HMDB00148;HMDB00161;HMDB00687;HMDB13773;HMDB00177	39 (108)	4.16e-06	0.000346	2.01e-05	0.0015
358	Silver	Ag+ 01h	Down	Amino acid and oligopeptide SLC transporters	Reactome	0		22 (51)	1	1	15	HMDB00056;HMDB00162;HMDB00251;HMDB00168;HMDB00172;HMDB03406;HMDB00159;HMDB00929;HMDB06055;HMDB00158;HMDB00148;HMDB01310;HMDB00161;HMDB00687;HMDB13773;HMDB00177	33 (49)	1.81e-06	0.000157	2.58e-05	0.00178
359	Silver	Ag+ 01h	Down	Transport of inorganic cations/anions and amino acids/oligopeptides	Reactome	0		56 (107)	1	1	15	HMDB00056;HMDB00162;HMDB00251;HMDB00168;HMDB00172;HMDB03406;HMDB00159;HMDB00929;HMDB06055;HMDB00158;HMDB00148;HMDB01310;HMDB00161;HMDB00687;HMDB13773;HMDB00177	34 (55)	2.92e-06	0.000248	4.02e-05	0.00257
360	Silver	Ag+ 01h	Down	Amino acid synthesis and interconversion (transamination)	Wikipathways	0		0 (0)	1	1	10	HMDB00056;HMDB00187;HMDB00162;HMDB00251;HMDB02104;HMDB00965;HMDB00168;HMDB00272;HMDB01721;HMDB00148;HMDB00161	20 (43)	4.64e-05	0.00319	4.64e-05	0.00319
361	Silver	Ag+ 01h	Down	Protein digestion and absorption - Homo sapiens (human)	KEGG	0		36 (90)	1	1	14	HMDB00056;HMDB00187;HMDB00162;HMDB00696;HMDB00167;HMDB00168;HMDB00172;HMDB00159;HMDB00929;HMDB00158;HMDB00148;HMDB00161;HMDB00687;HMDB13773;HMDB00177	31 (47)	4.79e-06	0.00039	6.35e-05	0.00379
362	Silver	Ag+ 01h	Down	Phase II conjugation	Wikipathways	0		0 (0)	1	1	14	HMDB00187;HMDB00162;HMDB00696;HMDB00167;HMDB00168;HMDB00172;HMDB00159;HMDB00929;HMDB00158;HMDB00148;HMDB01859;HMDB00161;HMDB00687;HMDB13773;HMDB00177	37 (164)	5.84e-05	0.00395	5.84e-05	0.00395
363	Silver	Ag+ 01h	Down	Tryptophan catabolism	Reactome	0		8 (13)	1	1	8	HMDB00172;HMDB00148;HMDB00159;HMDB00929;HMDB00158;HMDB00161;HMDB00687;HMDB13773;HMDB00177	11 (34)	6.66e-06	0.000531	8.6e-05	0.00482
364	Silver	Ag+ 01h	Down	Transport of glucose and other sugars_ bile salts and organic acids_ metal ions and amine compounds	Reactome	1	ENSG00000138821	54 (106)	0.268	1	13	HMDB00094;HMDB00056;HMDB00162;HMDB00251;HMDB00168;HMDB00172;HMDB00159;HMDB00929;HMDB06055;HMDB00158;HMDB00161;HMDB00687;HMDB13773;HMDB00177	31 (85)	3.07e-05	0.00215	0.000105	0.00551
365	Silver	Ag+ 01h	Down	Initial triggering of complement	Reactome	3	ENSG00000159403;ENSG00000182326;ENSG00000125730	8 (104)	9.74e-06	0.014	0		2 (19)	1	1	0.000122	0.00608
366	Silver	Ag+ 01h	Down	&gamma;-glutamyl cycle	HumanCyc	0		6 (6)	1	1	13	HMDB00187;HMDB00162;HMDB00696;HMDB00167;HMDB00168;HMDB00172;HMDB00148;HMDB00159;HMDB00929;HMDB00158;HMDB00161;HMDB00687;HMDB13773;HMDB00177	29 (48)	1.25e-05	0.000978	0.000154	0.00716
367	Silver	Ag+ 01h	Down	Cytosolic tRNA aminoacylation	Reactome	0		24 (26)	1	1	10	HMDB00162;HMDB00168;HMDB00172;HMDB00148;HMDB00159;HMDB00929;HMDB00158;HMDB00161;HMDB00687;HMDB13773;HMDB00177	18 (66)	1.37e-05	0.000997	0.000167	0.00716
368	Silver	Ag+ 01h	Down	mRNA_ protein_ and metabolite inducation pathway by cyclosporin A	Wikipathways	0		6 (6)	1	1	7	HMDB00167;HMDB00168;HMDB00172;HMDB00929;HMDB00158;HMDB00161;HMDB00687;HMDB13773	9 (9)	1.38e-05	0.000997	0.000168	0.00716
369	Silver	Ag+ 01h	Down	Histidine_ lysine_ phenylalanine_ tyrosine_ proline and tryptophan catabolism	Reactome	0		29 (45)	1	1	13	HMDB00056;HMDB00162;HMDB02104;HMDB00172;HMDB01372;HMDB00148;HMDB00159;HMDB00929;HMDB00158;HMDB00161;HMDB00734;HMDB00687;HMDB13773;HMDB00177	30 (90)	1.98e-05	0.00141	0.000235	0.00956
370	Silver	Ag+ 01h	Down	classical complement pathway	BioCarta	3	ENSG00000159403;ENSG00000182326;ENSG00000125730	6 (14)	3.51e-06	0.014	0		0 (2)	1	1	3.51e-06	0.014
371	Silver	Ag+ 01h	Down	Ifosfamide Pathway_ Pharmacodynamics	PharmGKB	3	ENSG00000198074;ENSG00000111275;ENSG00000108602	8 (14)	9.74e-06	0.014	0		0 (0)	1	1	9.74e-06	0.014
372	Silver	Ag+ 01h	Down	Creation of C4 and C2 activators	Reactome	2	ENSG00000159403;ENSG00000182326	2 (94)	3.23e-05	0.0199	0		2 (18)	1	1	0.000366	0.0143
373	Silver	Ag+ 01h	Down	SLC-mediated transmembrane transport	Reactome	1	ENSG00000138821	170 (286)	0.628	1	17	HMDB00056;HMDB00094;HMDB00162;HMDB00251;HMDB00172;HMDB00168;HMDB00929;HMDB03406;HMDB00159;HMDB00148;HMDB06055;HMDB00158;HMDB00210;HMDB01310;HMDB00161;HMDB00687;HMDB13773;HMDB00177	52 (173)	7.35e-05	0.0048	0.000507	0.0185
374	Silver	Ag+ 01h	Down	Tryptophan metabolism	Wikipathways	3	ENSG00000111275;ENSG00000138356;ENSG00000138061	25 (46)	0.000374	0.115	1	HMDB00929	1 (27)	0.13	1	0.000532	0.0185
375	Silver	Ag+ 01h	Down	Histidine degradation	INOH	2	ENSG00000111275;ENSG00000108602	14 (23)	0.00281	0.311	3	HMDB00056;HMDB00148;HMDB00177	5 (28)	0.0175	0.651	0.000536	0.0185
376	Silver	Ag+ 01h	Down	Complement Activation	Wikipathways	3	ENSG00000159403;ENSG00000182326;ENSG00000125730	11 (22)	2.84e-05	0.0199	0		0 (1)	1	1	2.84e-05	0.0199
377	Silver	Ag+ 01h	Down	Cyclophosphamide Pathway_ Pharmacodynamics	PharmGKB	3	ENSG00000198074;ENSG00000111275;ENSG00000108602	11 (17)	2.84e-05	0.0199	0		0 (0)	1	1	2.84e-05	0.0199
378	Silver	Ag+ 01h	Down	Classical antibody-mediated complement activation	Reactome	2	ENSG00000159403;ENSG00000182326	2 (88)	3.23e-05	0.0199	0		0 (11)	1	1	3.23e-05	0.0199
379	Silver	Ag+ 01h	Down	Metabolism of amino acids and derivatives	Reactome	0		248 (328)	1	1	20	HMDB00056;HMDB00172;HMDB00251;HMDB02104;HMDB00965;HMDB00168;HMDB12880;HMDB01372;HMDB00148;HMDB00159;HMDB00929;HMDB00162;HMDB00158;HMDB00272;HMDB01721;HMDB00766;HMDB00161;HMDB00271;HMDB00734;HMDB00687;HMDB13773;HMDB00177	67 (272)	6.37e-05	0.00423	0.000679	0.0218
380	Silver	Ag+ 01h	Down	Histidine Metabolism	SMPDB	2	ENSG00000111275;ENSG00000108602	7 (15)	0.000665	0.151	3	HMDB00056;HMDB00148;HMDB00177	9 (40)	0.0997	1	0.000705	0.0218
381	Silver	Ag+ 01h	Down	Histidinemia	SMPDB	2	ENSG00000111275;ENSG00000108602	7 (15)	0.000665	0.151	3	HMDB00056;HMDB00148;HMDB00177	9 (40)	0.0997	1	0.000705	0.0218
382	Silver	Ag+ 01h	Down	Tryptophan metabolism - Homo sapiens (human)	KEGG	3	ENSG00000138061;ENSG00000138356;ENSG00000111275	23 (40)	0.00029	0.0963	2	HMDB00734;HMDB00929	9 (81)	0.332	1	0.000986	0.0285
383	Silver	Ag+ 01h	Down	Methionine and cysteine metabolism	EHMN	2	ENSG00000134905;ENSG00000247626	63 (80)	0.0505	0.856	8	HMDB00187;HMDB00696;HMDB00251;HMDB11745;HMDB00965;HMDB00168;HMDB00148;HMDB00161	20 (80)	0.00191	0.11	0.000987	0.0285
384	Silver	Ag+ 01h	Down	Histidine_ lysine_ phenylalanine_ tyrosine_ proline and tryptophan catabolism	Wikipathways	0		0 (0)	1	1	10	HMDB00056;HMDB00162;HMDB02104;HMDB00148;HMDB00159;HMDB00929;HMDB00158;HMDB00161;HMDB00734;HMDB00177	25 (83)	0.000476	0.0292	0.000476	0.0292
385	Silver	Ag+ 01h	Down	Tryptophan Metabolism	SMPDB	2	ENSG00000111275;ENSG00000138356	10 (19)	0.00141	0.226	3	HMDB00161;HMDB00148;HMDB00929	8 (60)	0.0732	1	0.00105	0.0294
386	Silver	Ag+ 01h	Down	Complement cascade	Reactome	3	ENSG00000159403;ENSG00000182326;ENSG00000125730	19 (127)	0.000161	0.0696	0		2 (20)	1	1	0.00157	0.0426
387	Silver	Ag+ 01h	Down	Biogenic Amine Synthesis	Wikipathways	0		2 (15)	1	1	5	HMDB00177;HMDB00158;HMDB00148;HMDB00159;HMDB00929	6 (17)	0.000176	0.0113	0.0017	0.0448
388	Silver	Ag+ 01h	Down	Amino acid synthesis and interconversion (transamination)	Reactome	0		24 (32)	1	1	9	HMDB00056;HMDB00162;HMDB00251;HMDB02104;HMDB00965;HMDB00168;HMDB00272;HMDB01721;HMDB00148;HMDB00161	19 (43)	0.000202	0.0128	0.00192	0.049
389	Silver	Ag+ 01h	Down	Carnosinuria_ carnosinemia	SMPDB	1	ENSG00000111275	5 (9)	0.0284	0.672	5	HMDB00056;HMDB00026;HMDB00210;HMDB00148;HMDB00177	11 (34)	0.00799	0.339	0.00213	0.049
390	Silver	Ag+ 01h	Down	Ureidopropionase deficiency	SMPDB	1	ENSG00000111275	5 (9)	0.0284	0.672	5	HMDB00056;HMDB00026;HMDB00210;HMDB00148;HMDB00177	11 (34)	0.00799	0.339	0.00213	0.049
391	Silver	Ag+ 01h	Down	GABA-Transaminase Deficiency	SMPDB	1	ENSG00000111275	5 (9)	0.0284	0.672	5	HMDB00056;HMDB00026;HMDB00210;HMDB00148;HMDB00177	11 (34)	0.00799	0.339	0.00213	0.049
392	Silver	Ag+ 01h	Down	Beta-Alanine Metabolism	SMPDB	1	ENSG00000111275	5 (9)	0.0284	0.672	5	HMDB00056;HMDB00026;HMDB00210;HMDB00148;HMDB00177	11 (34)	0.00799	0.339	0.00213	0.049
393	Silver	Ag+ 06h	Up	Attenuation phase	Reactome	14	ENSG00000105993;ENSG00000204389;ENSG00000204388;ENSG00000204390;ENSG00000149257;ENSG00000160570;ENSG00000112110;ENSG00000004478;ENSG00000120694;ENSG00000170315;ENSG00000106211;ENSG00000132002;ENSG00000080824;ENSG00000096384	24 (29)	9.66e-12	4.17e-08	0		0 (2)	1	1	9.66e-12	4.17e-08
394	Silver	Ag+ 06h	Up	HSF1 activation	Reactome	14	ENSG00000105993;ENSG00000204389;ENSG00000204388;ENSG00000204390;ENSG00000149257;ENSG00000160570;ENSG00000112110;ENSG00000004478;ENSG00000120694;ENSG00000170315;ENSG00000106211;ENSG00000132002;ENSG00000080824;ENSG00000096384	27 (31)	8.32e-11	1.8e-07	0		0 (0)	1	1	8.32e-11	1.8e-07
395	Silver	Ag+ 06h	Up	HSF1-dependent transactivation	Reactome	14	ENSG00000105993;ENSG00000204389;ENSG00000204388;ENSG00000204390;ENSG00000149257;ENSG00000160570;ENSG00000112110;ENSG00000004478;ENSG00000120694;ENSG00000170315;ENSG00000106211;ENSG00000132002;ENSG00000080824;ENSG00000096384	30 (37)	5.08e-10	7.32e-07	0		0 (4)	1	1	5.08e-10	7.32e-07
396	Silver	Ag+ 06h	Up	Glucocorticoid Receptor Pathway	Wikipathways	19	ENSG00000179833;ENSG00000176597;ENSG00000067798;ENSG00000095752;ENSG00000099860;ENSG00000110330;ENSG00000023445;ENSG00000077150;ENSG00000116741;ENSG00000177606;ENSG00000122862;ENSG00000118503;ENSG00000148677;ENSG00000134107;ENSG00000080824;ENSG00000167772;ENSG00000043355;ENSG00000165997;ENSG00000129657	61 (71)	1.7e-09	1.81e-06	0		0 (1)	1	1	1.7e-09	1.81e-06
397	Silver	Ag+ 06h	Up	Tacrolimus/Cyclosporine Pathway_ Pharmacodynamics	PharmGKB	14	ENSG00000197063;ENSG00000162772;ENSG00000034152;ENSG00000198517;ENSG00000140044;ENSG00000177606;ENSG00000171223;ENSG00000125740;ENSG00000075426;ENSG00000185022;ENSG00000109320;ENSG00000077150;ENSG00000175592;ENSG00000221823	36 (44)	9.42e-09	6.78e-06	0		0 (2)	1	1	9.42e-09	6.78e-06
398	Silver	Ag+ 06h	Up	PI3K-Akt signaling pathway - Homo sapiens (human)	KEGG	36	ENSG00000150630;ENSG00000136997;ENSG00000187498;ENSG00000162434;ENSG00000170027;ENSG00000113575;ENSG00000104695;ENSG00000168209;ENSG00000128272;ENSG00000105401;ENSG00000213281;ENSG00000153094;ENSG00000175470;ENSG00000145623;ENSG00000171608;ENSG00000142627;ENSG00000109320;ENSG00000081913;ENSG00000143384;ENSG00000160712;ENSG00000064547;ENSG00000077782;ENSG00000164171;ENSG00000123358;ENSG00000135424…	210 (341)	1.27e-08	7.83e-06	0		0 (4)	1	1	1.27e-08	7.83e-06
399	Silver	Ag+ 06h	Up	Metallothioneins bind metals	Reactome	6	ENSG00000205362;ENSG00000169688;ENSG00000198417;ENSG00000125144;ENSG00000187193;ENSG00000125148	6 (12)	5.11e-08	2.45e-05	0		0 (4)	1	1	5.11e-08	2.45e-05
400	Silver	Ag+ 06h	Up	Response to metal ions	Reactome	6	ENSG00000205362;ENSG00000169688;ENSG00000198417;ENSG00000125144;ENSG00000187193;ENSG00000125148	6 (12)	5.11e-08	2.45e-05	0		0 (4)	1	1	5.11e-08	2.45e-05
401	Silver	Ag+ 06h	Up	Nuclear Receptors Meta-Pathway	Wikipathways	36	ENSG00000197063;ENSG00000105401;ENSG00000095752;ENSG00000136997;ENSG00000099860;ENSG00000132002;ENSG00000177606;ENSG00000171223;ENSG00000154025;ENSG00000165997;ENSG00000176597;ENSG00000146648;ENSG00000023909;ENSG00000161011;ENSG00000113070;ENSG00000122862;ENSG00000142627;ENSG00000148677;ENSG00000167772;ENSG00000167996;ENSG00000179833;ENSG00000067798;ENSG00000110330;ENSG00000023445;ENSG00000077150…	223 (316)	6.34e-08	2.74e-05	0		0 (0)	1	1	6.34e-08	2.74e-05
402	Silver	Ag+ 06h	Up	Cellular response to heat stress	Wikipathways	9	ENSG00000105993;ENSG00000170315;ENSG00000149257;ENSG00000132002;ENSG00000160570;ENSG00000004478;ENSG00000112110;ENSG00000106211;ENSG00000120694	12 (16)	2.1e-09	1.81e-06	0		2 (9)	1	1	4.4e-08	5.22e-05
403	Silver	Ag+ 06h	Up	AP-1 transcription factor network	PID	15	ENSG00000134954;ENSG00000153094;ENSG00000142871;ENSG00000197063;ENSG00000136997;ENSG00000177606;ENSG00000162772;ENSG00000125740;ENSG00000075426;ENSG00000171223;ENSG00000125148;ENSG00000120129;ENSG00000133636;ENSG00000168036;ENSG00000175592	50 (71)	1.58e-07	6.2e-05	0		0 (5)	1	1	1.58e-07	6.2e-05
404	Silver	Ag+ 06h	Up	TNF signaling pathway - Homo sapiens (human)	KEGG	20	ENSG00000150630;ENSG00000169032;ENSG00000034152;ENSG00000081041;ENSG00000110330;ENSG00000023445;ENSG00000146592;ENSG00000171608;ENSG00000171223;ENSG00000177606;ENSG00000056558;ENSG00000127191;ENSG00000128272;ENSG00000107968;ENSG00000109320;ENSG00000100906;ENSG00000118503;ENSG00000172216;ENSG00000184557;ENSG00000128342	89 (110)	2.82e-07	0.000101	0		0 (0)	1	1	2.82e-07	0.000101
405	Silver	Ag+ 06h	Up	Osteoclast differentiation - Homo sapiens (human)	KEGG	19	ENSG00000169032;ENSG00000115641;ENSG00000083799;ENSG00000175592;ENSG00000159128;ENSG00000125740;ENSG00000177606;ENSG00000171223;ENSG00000171608;ENSG00000127191;ENSG00000075426;ENSG00000161011;ENSG00000109320;ENSG00000077150;ENSG00000100906;ENSG00000162434;ENSG00000132170;ENSG00000184557;ENSG00000221823	84 (132)	5.03e-07	0.000145	0		0 (3)	1	1	5.03e-07	0.000145
406	Silver	Ag+ 06h	Up	Hypertrophy Model	Wikipathways	8	ENSG00000142871;ENSG00000119508;ENSG00000162772;ENSG00000113070;ENSG00000006652;ENSG00000150782;ENSG00000148677;ENSG00000112715	16 (20)	1.55e-06	0.000335	0		0 (0)	1	1	1.55e-06	0.000335
407	Silver	Ag+ 06h	Up	Focal Adhesion-PI3K-Akt-mTOR-signaling pathway	Wikipathways	30	ENSG00000150630;ENSG00000187498;ENSG00000162434;ENSG00000113575;ENSG00000104695;ENSG00000168209;ENSG00000171608;ENSG00000105401;ENSG00000128272;ENSG00000116016;ENSG00000175470;ENSG00000146592;ENSG00000213281;ENSG00000142627;ENSG00000081913;ENSG00000064547;ENSG00000077782;ENSG00000164171;ENSG00000145623;ENSG00000135424;ENSG00000169032;ENSG00000119630;ENSG00000077238;ENSG00000160712;ENSG00000096384…	196 (301)	2.57e-06	0.000505	0		0 (0)	1	1	2.57e-06	0.000505
408	Silver	Ag+ 06h	Up	VEGFA-VEGFR2 Signaling Pathway	Wikipathways	30	ENSG00000153234;ENSG00000177606;ENSG00000104419;ENSG00000108840;ENSG00000131398;ENSG00000113070;ENSG00000109320;ENSG00000100906;ENSG00000107338;ENSG00000134954;ENSG00000089159;ENSG00000106070;ENSG00000107263;ENSG00000119508;ENSG00000011422;ENSG00000128272;ENSG00000044115;ENSG00000168036;ENSG00000123358;ENSG00000115641;ENSG00000169032;ENSG00000034152;ENSG00000204389;ENSG00000117525;ENSG00000119630…	206 (236)	7.23e-06	0.00136	0		0 (0)	1	1	7.23e-06	0.00136
409	Silver	Ag+ 06h	Up	Signaling by VEGF	Reactome	33	ENSG00000150630;ENSG00000075391;ENSG00000162434;ENSG00000113575;ENSG00000104695;ENSG00000170315;ENSG00000150991;ENSG00000213281;ENSG00000198369;ENSG00000213658;ENSG00000101255;ENSG00000146648;ENSG00000254999;ENSG00000176170;ENSG00000167601;ENSG00000113070;ENSG00000120129;ENSG00000138166;ENSG00000139318;ENSG00000107338;ENSG00000089159;ENSG00000109270;ENSG00000077782;ENSG00000044115;ENSG00000175866…	211 (290)	4.86e-07	0.000145	1	HMDB00517	6 (38)	0.44	1	3.5e-06	0.00177
410	Silver	Ag+ 06h	Up	Cytokine Signaling in Immune system	Reactome	42	ENSG00000120833;ENSG00000159128;ENSG00000095752;ENSG00000128342;ENSG00000113575;ENSG00000104695;ENSG00000077150;ENSG00000127191;ENSG00000150991;ENSG00000107968;ENSG00000150782;ENSG00000166900;ENSG00000121060;ENSG00000213281;ENSG00000198369;ENSG00000213658;ENSG00000146648;ENSG00000166233;ENSG00000171608;ENSG00000161011;ENSG00000113070;ENSG00000120129;ENSG00000109320;ENSG00000109270;ENSG00000139318…	303 (487)	4.13e-07	0.000137	0		3 (37)	1	1	6.48e-06	0.00177
411	Silver	Ag+ 06h	Up	Immune System	Reactome	113	ENSG00000049860;ENSG00000083799;ENSG00000095752;ENSG00000153395;ENSG00000127191;ENSG00000150782;ENSG00000033627;ENSG00000123908;ENSG00000121060;ENSG00000198369;ENSG00000080815;ENSG00000242574;ENSG00000135047;ENSG00000122574;ENSG00000196352;ENSG00000182149;ENSG00000134070;ENSG00000123358;ENSG00000124226;ENSG00000169896;ENSG00000188766;ENSG00000120833;ENSG00000162434;ENSG00000072786;ENSG00000163191…	1194 (1950)	5.56e-07	0.00015	1	HMDB00517	15 (149)	0.769	1	6.7e-06	0.00177
412	Silver	Ag+ 06h	Up	Innate Immune System	Reactome	83	ENSG00000162734;ENSG00000008516;ENSG00000083799;ENSG00000177119;ENSG00000072786;ENSG00000163191;ENSG00000113575;ENSG00000104695;ENSG00000177606;ENSG00000171608;ENSG00000153395;ENSG00000127191;ENSG00000150991;ENSG00000107968;ENSG00000204386;ENSG00000033627;ENSG00000162434;ENSG00000121060;ENSG00000109332;ENSG00000213281;ENSG00000198369;ENSG00000080815;ENSG00000213658;ENSG00000101255;ENSG00000049860…	801 (1309)	6.96e-07	0.000177	1	HMDB00517	12 (116)	0.689	1	7.45e-06	0.00177
413	Silver	Ag+ 06h	Up	MAPK Signaling Pathway	Wikipathways	23	ENSG00000136997;ENSG00000177606;ENSG00000127191;ENSG00000213281;ENSG00000221823;ENSG00000146648;ENSG00000107968;ENSG00000120129;ENSG00000109320;ENSG00000138166;ENSG00000139318;ENSG00000109270;ENSG00000128272;ENSG00000123358;ENSG00000169032;ENSG00000034152;ENSG00000204389;ENSG00000116717;ENSG00000175197;ENSG00000106211;ENSG00000167193;ENSG00000077782;ENSG00000138834	139 (168)	1.05e-05	0.00181	0		0 (1)	1	1	1.05e-05	0.00181
414	Silver	Ag+ 06h	Up	Zinc homeostasis	Wikipathways	9	ENSG00000170385;ENSG00000158014;ENSG00000205362;ENSG00000169688;ENSG00000198417;ENSG00000125144;ENSG00000187193;ENSG00000125148;ENSG00000104635	26 (37)	1.37e-05	0.00228	0		0 (1)	1	1	1.37e-05	0.00228
415	Silver	Ag+ 06h	Up	MAPK signaling pathway - Homo sapiens (human)	KEGG	30	ENSG00000136997;ENSG00000099860;ENSG00000177606;ENSG00000128591;ENSG00000133818;ENSG00000127191;ENSG00000213281;ENSG00000221823;ENSG00000146648;ENSG00000107968;ENSG00000120129;ENSG00000109320;ENSG00000138166;ENSG00000139318;ENSG00000008735;ENSG00000109270;ENSG00000077150;ENSG00000077782;ENSG00000123358;ENSG00000169032;ENSG00000034152;ENSG00000204389;ENSG00000204388;ENSG00000204390;ENSG00000116717…	186 (255)	8.34e-07	0.0002	0		1 (5)	1	1	1.25e-05	0.00247
416	Silver	Ag+ 06h	Up	VEGFA-VEGFR2 Pathway	Reactome	31	ENSG00000075391;ENSG00000162434;ENSG00000113575;ENSG00000104695;ENSG00000170315;ENSG00000150991;ENSG00000213281;ENSG00000198369;ENSG00000213658;ENSG00000101255;ENSG00000146648;ENSG00000254999;ENSG00000176170;ENSG00000167601;ENSG00000113070;ENSG00000120129;ENSG00000138166;ENSG00000139318;ENSG00000107338;ENSG00000089159;ENSG00000109270;ENSG00000077782;ENSG00000044115;ENSG00000175866;ENSG00000168036…	205 (282)	2.27e-06	0.000467	1	HMDB00517	6 (38)	0.44	1	1.48e-05	0.00251
417	Silver	Ag+ 06h	Up	Signaling by Interleukins	Reactome	35	ENSG00000162434;ENSG00000095752;ENSG00000128342;ENSG00000113575;ENSG00000104695;ENSG00000077150;ENSG00000170315;ENSG00000150991;ENSG00000107968;ENSG00000150782;ENSG00000166900;ENSG00000213281;ENSG00000198369;ENSG00000213658;ENSG00000146648;ENSG00000171608;ENSG00000161011;ENSG00000113070;ENSG00000120129;ENSG00000109320;ENSG00000107263;ENSG00000139318;ENSG00000184557;ENSG00000075391;ENSG00000134070…	240 (373)	1.2e-06	0.000272	0		3 (24)	1	1	1.75e-05	0.0026
418	Silver	Ag+ 06h	Up	Apoptosis - Homo sapiens (human)	KEGG	20	ENSG00000177606;ENSG00000135047;ENSG00000153094;ENSG00000213281;ENSG00000141682;ENSG00000175197;ENSG00000099860;ENSG00000110330;ENSG00000143384;ENSG00000171608;ENSG00000116717;ENSG00000056558;ENSG00000127191;ENSG00000128272;ENSG00000169032;ENSG00000109320;ENSG00000100906;ENSG00000173530;ENSG00000120889;ENSG00000023445	115 (140)	1.86e-05	0.0029	0		0 (4)	1	1	1.86e-05	0.0029
419	Silver	Ag+ 06h	Up	Validated transcriptional targets of AP1 family members Fra1 and Fra2	PID	9	ENSG00000128342;ENSG00000086712;ENSG00000177606;ENSG00000171223;ENSG00000011422;ENSG00000075426;ENSG00000128272;ENSG00000100292;ENSG00000175592	27 (38)	1.95e-05	0.0029	0		0 (2)	1	1	1.95e-05	0.0029
420	Silver	Ag+ 06h	Up	TGF-beta Receptor Signaling	Wikipathways	11	ENSG00000136603;ENSG00000137834;ENSG00000162434;ENSG00000128342;ENSG00000177606;ENSG00000169554;ENSG00000109320;ENSG00000166949;ENSG00000134363;ENSG00000168036;ENSG00000106366	42 (55)	3.05e-05	0.0042	0		0 (0)	1	1	3.05e-05	0.0042
421	Silver	Ag+ 06h	Up	Influenza A - Homo sapiens (human)	KEGG	20	ENSG00000162434;ENSG00000242574;ENSG00000034152;ENSG00000204389;ENSG00000204388;ENSG00000204390;ENSG00000089127;ENSG00000159128;ENSG00000177606;ENSG00000171608;ENSG00000109320;ENSG00000162231;ENSG00000169032;ENSG00000150782;ENSG00000132002;ENSG00000100906;ENSG00000173530;ENSG00000121060;ENSG00000120889;ENSG00000184557	119 (175)	3.11e-05	0.0042	0		0 (3)	1	1	3.11e-05	0.0042
422	Silver	Ag+ 06h	Up	CD40/CD40L signaling	PID	9	ENSG00000136997;ENSG00000110330;ENSG00000023445;ENSG00000100906;ENSG00000177606;ENSG00000056558;ENSG00000127191;ENSG00000109320;ENSG00000118503	29 (34)	3.73e-05	0.0046	0		0 (1)	1	1	3.73e-05	0.0046
423	Silver	Ag+ 06h	Up	Rheumatoid arthritis - Homo sapiens (human)	KEGG	11	ENSG00000113732;ENSG00000242574;ENSG00000135047;ENSG00000177606;ENSG00000136888;ENSG00000155097;ENSG00000150782;ENSG00000033627;ENSG00000159720;ENSG00000112715;ENSG00000095752	43 (90)	3.88e-05	0.0046	0		0 (4)	1	1	3.88e-05	0.0046
424	Silver	Ag+ 06h	Up	miR-targeted genes in leukocytes - TarBase	Wikipathways	20	ENSG00000113732;ENSG00000109270;ENSG00000172216;ENSG00000157827;ENSG00000115310;ENSG00000132002;ENSG00000143384;ENSG00000033627;ENSG00000006652;ENSG00000065911;ENSG00000107968;ENSG00000105810;ENSG00000110880;ENSG00000110172;ENSG00000159176;ENSG00000134686;ENSG00000108179;ENSG00000168374;ENSG00000168036;ENSG00000100292	124 (156)	5.72e-05	0.00605	0		0 (0)	1	1	5.72e-05	0.00605
425	Silver	Ag+ 06h	Up	Apoptosis	Wikipathways	14	ENSG00000136997;ENSG00000153094;ENSG00000141682;ENSG00000110330;ENSG00000023445;ENSG00000177606;ENSG00000056558;ENSG00000127191;ENSG00000109320;ENSG00000129473;ENSG00000100906;ENSG00000104765;ENSG00000120889;ENSG00000143384	69 (85)	5.89e-05	0.00605	0		0 (0)	1	1	5.89e-05	0.00605
426	Silver	Ag+ 06h	Up	Apoptotic Signaling Pathway	Wikipathways	14	ENSG00000136997;ENSG00000153094;ENSG00000141682;ENSG00000110330;ENSG00000023445;ENSG00000177606;ENSG00000056558;ENSG00000127191;ENSG00000109320;ENSG00000129473;ENSG00000100906;ENSG00000104765;ENSG00000120889;ENSG00000143384	69 (85)	5.89e-05	0.00605	0		0 (0)	1	1	5.89e-05	0.00605
427	Silver	Ag+ 06h	Up	Signal Transduction	Reactome	120	ENSG00000136997;ENSG00000133121;ENSG00000083799;ENSG00000171608;ENSG00000155097;ENSG00000056558;ENSG00000127191;ENSG00000112335;ENSG00000065989;ENSG00000033627;ENSG00000123908;ENSG00000198369;ENSG00000038382;ENSG00000254999;ENSG00000167601;ENSG00000122574;ENSG00000196352;ENSG00000175832;ENSG00000164171;ENSG00000120889;ENSG00000123358;ENSG00000087074;ENSG00000110492;ENSG00000203879;ENSG00000124225…	1361 (2538)	8.93e-06	0.00161	5	HMDB02995;HMDB12874;HMDB01852;HMDB02369;HMDB00182;HMDB00517	52 (254)	0.532	1	6.29e-05	0.00797
428	Silver	Ag+ 06h	Up	Th17 cell differentiation - Homo sapiens (human)	KEGG	14	ENSG00000213658;ENSG00000166949;ENSG00000162434;ENSG00000242574;ENSG00000177606;ENSG00000077238;ENSG00000080824;ENSG00000160712;ENSG00000221823;ENSG00000109320;ENSG00000100906;ENSG00000159128;ENSG00000159216;ENSG00000096384	65 (107)	2.91e-05	0.00419	1	HMDB12874;HMDB01852	2 (4)	0.175	1	6.72e-05	0.00797
429	Silver	Ag+ 06h	Up	Hematopoietic cell lineage - Homo sapiens (human)	KEGG	9	ENSG00000026508;ENSG00000196352;ENSG00000095752;ENSG00000085063;ENSG00000077238;ENSG00000169896;ENSG00000160712;ENSG00000164171;ENSG00000242574	32 (97)	8.85e-05	0.00813	0		0 (0)	1	1	8.85e-05	0.00813
430	Silver	Ag+ 06h	Up	HIF-1-alpha transcription factor network	PID	12	ENSG00000107159;ENSG00000134954;ENSG00000115738;ENSG00000134107;ENSG00000143384;ENSG00000177606;ENSG00000112715;ENSG00000166949;ENSG00000100292;ENSG00000147872;ENSG00000104419;ENSG00000106366	55 (67)	9.45e-05	0.00846	0		0 (2)	1	1	9.45e-05	0.00846
431	Silver	Ag+ 06h	Up	TGF_beta_Receptor	NetPath	23	ENSG00000136997;ENSG00000138134;ENSG00000177606;ENSG00000171223;ENSG00000109332;ENSG00000155090;ENSG00000159216;ENSG00000125740;ENSG00000026508;ENSG00000134954;ENSG00000198742;ENSG00000089159;ENSG00000162772;ENSG00000044115;ENSG00000168036;ENSG00000087074;ENSG00000136603;ENSG00000034152;ENSG00000169554;ENSG00000167193;ENSG00000166949;ENSG00000137834;ENSG00000105810	160 (176)	0.000104	0.00877	0		0 (0)	1	1	0.000104	0.00877
432	Silver	Ag+ 06h	Up	Pathways in cancer - Homo sapiens (human)	KEGG	36	ENSG00000150630;ENSG00000136997;ENSG00000187498;ENSG00000162434;ENSG00000177606;ENSG00000056558;ENSG00000127191;ENSG00000081059;ENSG00000213281;ENSG00000146648;ENSG00000171608;ENSG00000109320;ENSG00000077150;ENSG00000100906;ENSG00000143816;ENSG00000134954;ENSG00000110330;ENSG00000023445;ENSG00000166949;ENSG00000064547;ENSG00000077782;ENSG00000044115;ENSG00000167034;ENSG00000164171;ENSG00000168036…	292 (397)	4.02e-05	0.0046	2	HMDB12874;HMDB01852;HMDB02369	8 (27)	0.161	1	8.4e-05	0.00906
433	Silver	Ag+ 06h	Up	Vemurafenib Pathway_ Pharmacodynamics	PharmGKB	7	ENSG00000136997;ENSG00000146648;ENSG00000134954;ENSG00000177606;ENSG00000077782;ENSG00000169032;ENSG00000213281	20 (25)	0.000119	0.0095	0		0 (1)	1	1	0.000119	0.0095
434	Silver	Ag+ 06h	Up	Adipogenesis	Wikipathways	16	ENSG00000101255;ENSG00000149187;ENSG00000168036;ENSG00000067082;ENSG00000175197;ENSG00000099860;ENSG00000116717;ENSG00000172216;ENSG00000116604;ENSG00000116016;ENSG00000128342;ENSG00000166949;ENSG00000147872;ENSG00000132170;ENSG00000184557;ENSG00000106366	92 (131)	0.000126	0.0099	0		0 (0)	1	1	0.000126	0.0099
435	Silver	Ag+ 06h	Up	Hepatitis C and Hepatocellular Carcinoma	Wikipathways	10	ENSG00000026508;ENSG00000085733;ENSG00000162434;ENSG00000136997;ENSG00000023445;ENSG00000177606;ENSG00000160712;ENSG00000109320;ENSG00000166949;ENSG00000112715	42 (50)	0.000167	0.0118	0		0 (0)	1	1	0.000167	0.0118
436	Silver	Ag+ 06h	Up	Canonical NF-kappaB pathway	PID	7	ENSG00000083799;ENSG00000110330;ENSG00000100906;ENSG00000142867;ENSG00000109320;ENSG00000118503;ENSG00000109332	21 (23)	0.000169	0.0118	0		0 (1)	1	1	0.000169	0.0118
437	Silver	Ag+ 06h	Up	Inflammatory bowel disease (IBD) - Homo sapiens (human)	KEGG	7	ENSG00000159128;ENSG00000150782;ENSG00000177606;ENSG00000077238;ENSG00000109320;ENSG00000166949;ENSG00000242574	21 (65)	0.000169	0.0118	0		0 (0)	1	1	0.000169	0.0118
438	Silver	Ag+ 06h	Up	Oncostatin M Signaling Pathway	Wikipathways	12	ENSG00000142871;ENSG00000169032;ENSG00000089159;ENSG00000171223;ENSG00000112715;ENSG00000109320;ENSG00000100906;ENSG00000162434;ENSG00000172216;ENSG00000145623;ENSG00000184557;ENSG00000106366	59 (65)	0.000193	0.013	0		0 (0)	1	1	0.000193	0.013
439	Silver	Ag+ 06h	Up	TNF receptor signaling pathway	PID	10	ENSG00000083799;ENSG00000034152;ENSG00000110330;ENSG00000023445;ENSG00000161011;ENSG00000092871;ENSG00000056558;ENSG00000127191;ENSG00000109320;ENSG00000118503	43 (47)	0.000206	0.0135	0		0 (1)	1	1	0.000206	0.0135
440	Silver	Ag+ 06h	Up	Photodynamic therapy-induced NF-kB survival signaling	Wikipathways	7	ENSG00000081041;ENSG00000110330;ENSG00000023445;ENSG00000129473;ENSG00000109320;ENSG00000077150;ENSG00000112715	22 (35)	0.000235	0.0141	0		0 (0)	1	1	0.000235	0.0141
441	Silver	Ag+ 06h	Up	ATF-2 transcription factor network	PID	10	ENSG00000140044;ENSG00000177606;ENSG00000162772;ENSG00000116717;ENSG00000175197;ENSG00000120129;ENSG00000171223;ENSG00000138166;ENSG00000175183;ENSG00000184557	44 (61)	0.000253	0.0148	0		0 (3)	1	1	0.000253	0.0148
442	Silver	Ag+ 06h	Up	Legionellosis - Homo sapiens (human)	KEGG	10	ENSG00000169896;ENSG00000150782;ENSG00000204389;ENSG00000081041;ENSG00000204390;ENSG00000013441;ENSG00000204388;ENSG00000109320;ENSG00000077150;ENSG00000100906	44 (55)	0.000253	0.0148	0		0 (2)	1	1	0.000253	0.0148
443	Silver	Ag+ 06h	Up	Apoptosis Modulation and Signaling	Wikipathways	14	ENSG00000153094;ENSG00000120889;ENSG00000141682;ENSG00000204389;ENSG00000110330;ENSG00000162734;ENSG00000177606;ENSG00000143384;ENSG00000109320;ENSG00000129473;ENSG00000100906;ENSG00000173530;ENSG00000151929;ENSG00000023445	79 (92)	0.000269	0.0151	0		0 (1)	1	1	0.000269	0.0151
444	Silver	Ag+ 06h	Up	Apoptosis Modulation and Signaling	Wikipathways	14	ENSG00000153094;ENSG00000120889;ENSG00000141682;ENSG00000204389;ENSG00000110330;ENSG00000162734;ENSG00000177606;ENSG00000143384;ENSG00000109320;ENSG00000129473;ENSG00000100906;ENSG00000173530;ENSG00000151929;ENSG00000023445	79 (92)	0.000269	0.0151	0		0 (1)	1	1	0.000269	0.0151
445	Silver	Ag+ 06h	Up	Apoptosis Modulation and Signaling	Wikipathways	14	ENSG00000153094;ENSG00000120889;ENSG00000141682;ENSG00000204389;ENSG00000110330;ENSG00000162734;ENSG00000177606;ENSG00000143384;ENSG00000109320;ENSG00000129473;ENSG00000100906;ENSG00000173530;ENSG00000151929;ENSG00000023445	79 (92)	0.000269	0.0151	0		0 (1)	1	1	0.000269	0.0151
446	Silver	Ag+ 06h	Up	NF-kB is activated and signals survival	Reactome	5	ENSG00000100906;ENSG00000170315;ENSG00000150991;ENSG00000109320;ENSG00000161011	11 (14)	0.000286	0.0154	0		0 (2)	1	1	0.000286	0.0154
447	Silver	Ag+ 06h	Up	TNF related weak inducer of apoptosis (TWEAK) Signaling Pathway	Wikipathways	9	ENSG00000110330;ENSG00000023445;ENSG00000177606;ENSG00000056558;ENSG00000127191;ENSG00000109320;ENSG00000077150;ENSG00000100906;ENSG00000168036	37 (41)	0.000298	0.0157	0		0 (0)	1	1	0.000298	0.0157
448	Silver	Ag+ 06h	Up	Aryl Hydrocarbon Receptor	Wikipathways	9	ENSG00000136997;ENSG00000067082;ENSG00000109320;ENSG00000080824;ENSG00000169032;ENSG00000105401;ENSG00000146648;ENSG00000213281;ENSG00000112715	37 (46)	0.000298	0.0157	0		0 (2)	1	1	0.000298	0.0157
449	Silver	Ag+ 06h	Up	Tuberculosis - Homo sapiens (human)	KEGG	17	ENSG00000169896;ENSG00000242574;ENSG00000075785;ENSG00000134070;ENSG00000159128;ENSG00000185896;ENSG00000176170;ENSG00000109320;ENSG00000113013;ENSG00000142867;ENSG00000221823;ENSG00000150782;ENSG00000033627;ENSG00000162434;ENSG00000159720;ENSG00000172216;ENSG00000153879	111 (179)	0.000384	0.019	0		0 (9)	1	1	0.000384	0.019
450	Silver	Ag+ 06h	Up	ATF4 activates genes	Wikipathways	4	ENSG00000070669;ENSG00000175197;ENSG00000162772;ENSG00000051108	7 (7)	0.000418	0.0203	0		0 (0)	1	1	0.000418	0.0203
451	Silver	Ag+ 06h	Up	MAPK family signaling cascades	Reactome	25	ENSG00000136997;ENSG00000162434;ENSG00000132002;ENSG00000113575;ENSG00000104695;ENSG00000177606;ENSG00000170315;ENSG00000150991;ENSG00000213281;ENSG00000198369;ENSG00000213658;ENSG00000146648;ENSG00000113070;ENSG00000120129;ENSG00000138166;ENSG00000139318;ENSG00000175832;ENSG00000109270;ENSG00000077782;ENSG00000169032;ENSG00000162734;ENSG00000188766;ENSG00000160712;ENSG00000106211;ENSG00000075391	164 (240)	1.9e-05	0.0029	0		3 (18)	1	1	0.000226	0.0223
452	Silver	Ag+ 06h	Up	Proteoglycans in cancer - Homo sapiens (human)	KEGG	21	ENSG00000026508;ENSG00000136997;ENSG00000143816;ENSG00000113070;ENSG00000089159;ENSG00000124145;ENSG00000146648;ENSG00000169032;ENSG00000171608;ENSG00000128591;ENSG00000090447;ENSG00000133818;ENSG00000011422;ENSG00000135047;ENSG00000077782;ENSG00000168101;ENSG00000085733;ENSG00000164171;ENSG00000168036;ENSG00000213281;ENSG00000112715	156 (205)	0.000511	0.0223	0		0 (7)	1	1	0.000511	0.0223
453	Silver	Ag+ 06h	Up	Photodynamic therapy-induced unfolded protein response	Wikipathways	7	ENSG00000101255;ENSG00000153094;ENSG00000175197;ENSG00000162772;ENSG00000128272;ENSG00000070669;ENSG00000087074	25 (27)	0.000564	0.0239	0		0 (0)	1	1	0.000564	0.0239
454	Silver	Ag+ 06h	Up	Senescence and Autophagy in Cancer	Wikipathways	14	ENSG00000026508;ENSG00000169032;ENSG00000034152;ENSG00000185896;ENSG00000177606;ENSG00000161011;ENSG00000108821;ENSG00000160712;ENSG00000106366;ENSG00000166949;ENSG00000172216;ENSG00000023287;ENSG00000139112;ENSG00000140941	85 (105)	0.000586	0.0246	0		0 (1)	1	1	0.000586	0.0246
455	Silver	Ag+ 06h	Up	keratinocyte differentiation	BioCarta	10	ENSG00000134954;ENSG00000169032;ENSG00000034152;ENSG00000110330;ENSG00000023445;ENSG00000177606;ENSG00000056558;ENSG00000127191;ENSG00000100906;ENSG00000146648	49 (53)	0.000635	0.0261	0		0 (5)	1	1	0.000635	0.0261
456	Silver	Ag+ 06h	Up	Photodynamic therapy-induced AP-1 survival signaling.	Wikipathways	9	ENSG00000153094;ENSG00000146648;ENSG00000034152;ENSG00000143384;ENSG00000177606;ENSG00000171223;ENSG00000113070;ENSG00000127191;ENSG00000080824	41 (50)	0.000675	0.027	0		0 (0)	1	1	0.000675	0.027
457	Silver	Ag+ 06h	Up	Interleukin-6 family signaling	Reactome	6	ENSG00000162434;ENSG00000095752;ENSG00000128342;ENSG00000160712;ENSG00000145623;ENSG00000184557	19 (27)	0.000697	0.0275	0		0 (3)	1	1	0.000697	0.0275
458	Silver	Ag+ 06h	Up	Focal Adhesion	Wikipathways	19	ENSG00000150630;ENSG00000187498;ENSG00000169032;ENSG00000089159;ENSG00000034152;ENSG00000107263;ENSG00000023445;ENSG00000119630;ENSG00000171608;ENSG00000146648;ENSG00000177606;ENSG00000169896;ENSG00000167193;ENSG00000110330;ENSG00000164171;ENSG00000168036;ENSG00000108821;ENSG00000112715;ENSG00000135424	138 (190)	0.000705	0.0275	0		0 (0)	1	1	0.000705	0.0275
459	Silver	Ag+ 06h	Up	Thyroid cancer - Homo sapiens (human)	KEGG	7	ENSG00000136997;ENSG00000169032;ENSG00000081059;ENSG00000168036;ENSG00000132170;ENSG00000213281;ENSG00000266412	26 (29)	0.000731	0.0275	0		0 (0)	1	1	0.000731	0.0275
460	Silver	Ag+ 06h	Up	Hippo signaling pathway - Homo sapiens (human)	KEGG	17	ENSG00000136997;ENSG00000139926;ENSG00000168036;ENSG00000175470;ENSG00000115738;ENSG00000110330;ENSG00000113575;ENSG00000170027;ENSG00000153162;ENSG00000081059;ENSG00000213923;ENSG00000044115;ENSG00000166949;ENSG00000104695;ENSG00000143816;ENSG00000150457;ENSG00000106366	118 (154)	0.00079	0.0292	0		0 (0)	1	1	0.00079	0.0292
461	Silver	Ag+ 06h	Up	InlA-mediated entry of Listeria monocytogenes into host cells	Reactome	4	ENSG00000105879;ENSG00000170315;ENSG00000168036;ENSG00000150991	8 (8)	0.000797	0.0292	0		0 (2)	1	1	0.000797	0.0292
462	Silver	Ag+ 06h	Up	Interleukin-1 processing	Reactome	3	ENSG00000150782;ENSG00000109320;ENSG00000077150	4 (7)	0.000871	0.0311	0		0 (0)	1	1	0.000871	0.0311
463	Silver	Ag+ 06h	Up	Apoptosis-related network due to altered Notch3 in ovarian cancer	Wikipathways	10	ENSG00000134954;ENSG00000106211;ENSG00000161011;ENSG00000056558;ENSG00000060138;ENSG00000164111;ENSG00000109320;ENSG00000044115;ENSG00000120889;ENSG00000184557	51 (53)	0.000885	0.0313	0		0 (0)	1	1	0.000885	0.0313
464	Silver	Ag+ 06h	Up	RANKL	NetPath	6	ENSG00000083799;ENSG00000161011;ENSG00000056558;ENSG00000127191;ENSG00000109320;ENSG00000077150	20 (23)	0.000945	0.0324	0		0 (0)	1	1	0.000945	0.0324
465	Silver	Ag+ 06h	Up	hypoxia and p53 in the cardiovascular system	BioCarta	6	ENSG00000115641;ENSG00000204389;ENSG00000204388;ENSG00000116717;ENSG00000077721;ENSG00000080824	20 (23)	0.000945	0.0324	0		0 (0)	1	1	0.000945	0.0324
466	Silver	Ag+ 06h	Up	Corticotropin-releasing hormone signaling pathway	Wikipathways	12	ENSG00000153234;ENSG00000169032;ENSG00000109320;ENSG00000171223;ENSG00000100906;ENSG00000125740;ENSG00000075426;ENSG00000150782;ENSG00000080824;ENSG00000168036;ENSG00000123358;ENSG00000175592	70 (92)	0.00099	0.033	0		0 (0)	1	1	0.00099	0.033
467	Silver	Ag+ 06h	Up	miR-targeted genes in lymphocytes - TarBase	Wikipathways	40	ENSG00000111371;ENSG00000134294;ENSG00000132002;ENSG00000072682;ENSG00000135069;ENSG00000089902;ENSG00000006652;ENSG00000107968;ENSG00000033627;ENSG00000172216;ENSG00000100292;ENSG00000221823;ENSG00000113732;ENSG00000168036;ENSG00000146648;ENSG00000129245;ENSG00000065911;ENSG00000167601;ENSG00000131018;ENSG00000110880;ENSG00000115310;ENSG00000159176;ENSG00000104907;ENSG00000109270;ENSG00000143384…	394 (486)	0.000999	0.033	0		0 (0)	1	1	0.000999	0.033
468	Silver	Ag+ 06h	Up	Focal adhesion - Homo sapiens (human)	KEGG	19	ENSG00000150630;ENSG00000187498;ENSG00000146648;ENSG00000089159;ENSG00000118680;ENSG00000169032;ENSG00000110330;ENSG00000023445;ENSG00000119630;ENSG00000177606;ENSG00000128591;ENSG00000171608;ENSG00000167193;ENSG00000107263;ENSG00000164171;ENSG00000168036;ENSG00000108821;ENSG00000112715;ENSG00000135424	142 (201)	0.001	0.033	0		0 (2)	1	1	0.001	0.033
469	Silver	Ag+ 06h	Up	Integrated Pancreatic Cancer Pathway	Wikipathways	19	ENSG00000136997;ENSG00000137834;ENSG00000169032;ENSG00000095752;ENSG00000146648;ENSG00000134363;ENSG00000177606;ENSG00000198900;ENSG00000109320;ENSG00000112715;ENSG00000127191;ENSG00000077782;ENSG00000171223;ENSG00000167193;ENSG00000106615;ENSG00000168036;ENSG00000013588;ENSG00000023287;ENSG00000096384	142 (170)	0.001	0.033	0		0 (0)	1	1	0.001	0.033
470	Silver	Ag+ 06h	Up	Beta3 integrin cell surface interactions	PID	8	ENSG00000158769;ENSG00000187498;ENSG00000142871;ENSG00000124145;ENSG00000176170;ENSG00000011422;ENSG00000108821;ENSG00000112715	35 (43)	0.00101	0.033	0		0 (3)	1	1	0.00101	0.033
471	Silver	Ag+ 06h	Up	miR-targeted genes in epithelium - TarBase	Wikipathways	29	ENSG00000111371;ENSG00000134294;ENSG00000132002;ENSG00000072682;ENSG00000135069;ENSG00000006652;ENSG00000172216;ENSG00000113732;ENSG00000142871;ENSG00000146648;ENSG00000065911;ENSG00000107968;ENSG00000131018;ENSG00000110880;ENSG00000115310;ENSG00000159176;ENSG00000104907;ENSG00000109270;ENSG00000160886;ENSG00000108179;ENSG00000100292;ENSG00000120889;ENSG00000073712;ENSG00000108821;ENSG00000137575…	258 (330)	0.00105	0.0337	0		0 (0)	1	1	0.00105	0.0337
472	Silver	Ag+ 06h	Up	p75NTR signals via NF-kB	Reactome	5	ENSG00000100906;ENSG00000170315;ENSG00000150991;ENSG00000109320;ENSG00000161011	14 (17)	0.00106	0.0337	0		0 (2)	1	1	0.00106	0.0337
473	Silver	Ag+ 06h	Up	BMAL1:CLOCK_NPAS2 activates circadian gene expression	Reactome	5	ENSG00000134107;ENSG00000179094;ENSG00000106366;ENSG00000151014;ENSG00000008405	14 (19)	0.00106	0.0337	0		0 (1)	1	1	0.00106	0.0337
474	Silver	Ag+ 06h	Up	T helper 17 (Th17) targets (ROYAN institute)	Wikipathways	5	ENSG00000134954;ENSG00000160712;ENSG00000075426;ENSG00000132170;ENSG00000184557	14 (19)	0.00106	0.0337	0		0 (0)	1	1	0.00106	0.0337
475	Silver	Ag+ 06h	Up	TNF alpha Signaling Pathway	Wikipathways	16	ENSG00000105401;ENSG00000034152;ENSG00000056558;ENSG00000110330;ENSG00000023445;ENSG00000113575;ENSG00000177606;ENSG00000107968;ENSG00000092871;ENSG00000118503;ENSG00000127191;ENSG00000109320;ENSG00000077150;ENSG00000080824;ENSG00000100906;ENSG00000213281	84 (93)	4.03e-05	0.0046	0		1 (3)	1	1	0.000448	0.0356
476	Silver	Ag+ 06h	Up	Signaling by Insulin receptor	Reactome	28	ENSG00000162434;ENSG00000113575;ENSG00000104695;ENSG00000155097;ENSG00000170315;ENSG00000150991;ENSG00000033627;ENSG00000159720;ENSG00000213281;ENSG00000198369;ENSG00000113732;ENSG00000101255;ENSG00000146648;ENSG00000113070;ENSG00000120129;ENSG00000138166;ENSG00000139318;ENSG00000213658;ENSG00000106070;ENSG00000109270;ENSG00000136888;ENSG00000077782;ENSG00000106615;ENSG00000169032;ENSG00000162734…	203 (278)	4.04e-05	0.0046	0		3 (22)	1	1	0.000449	0.0356
477	Silver	Ag+ 06h	Up	Cellular response to heat stress	Reactome	17	ENSG00000105993;ENSG00000204389;ENSG00000204388;ENSG00000204390;ENSG00000149257;ENSG00000225217;ENSG00000170315;ENSG00000113013;ENSG00000160570;ENSG00000004478;ENSG00000080824;ENSG00000112110;ENSG00000106211;ENSG00000132002;ENSG00000120694;ENSG00000151929;ENSG00000096384	93 (100)	4.05e-05	0.0046	0		2 (9)	1	1	0.00045	0.0356
478	Silver	Ag+ 06h	Up	TGF-beta Signaling Pathway	Wikipathways	17	ENSG00000134954;ENSG00000136603;ENSG00000169032;ENSG00000034152;ENSG00000067082;ENSG00000177606;ENSG00000171223;ENSG00000169554;ENSG00000125740;ENSG00000162772;ENSG00000136997;ENSG00000138134;ENSG00000166949;ENSG00000164171;ENSG00000155090;ENSG00000198742;ENSG00000049759	122 (132)	0.00116	0.0365	0		0 (0)	1	1	0.00116	0.0365
479	Silver	Ag+ 06h	Up	Toxoplasmosis - Homo sapiens (human)	KEGG	13	ENSG00000162434;ENSG00000242574;ENSG00000034152;ENSG00000204389;ENSG00000204388;ENSG00000110330;ENSG00000159128;ENSG00000171608;ENSG00000109320;ENSG00000204390;ENSG00000100906;ENSG00000108179;ENSG00000023445	81 (118)	0.00117	0.0366	0		0 (3)	1	1	0.00117	0.0366
480	Silver	Ag+ 06h	Up	Small cell lung cancer - Homo sapiens (human)	KEGG	11	ENSG00000136997;ENSG00000187498;ENSG00000110330;ENSG00000023445;ENSG00000171608;ENSG00000056558;ENSG00000127191;ENSG00000109320;ENSG00000100906;ENSG00000164171;ENSG00000105810	75 (86)	0.0056	0.108	2	HMDB12874;HMDB01852;HMDB02369	2 (3)	0.00823	0.608	0.000506	0.0375
481	Silver	Ag+ 06h	Up	Gastrin	NetPath	8	ENSG00000146648;ENSG00000089159;ENSG00000177606;ENSG00000109320;ENSG00000100906;ENSG00000169032;ENSG00000168036;ENSG00000132170	36 (41)	0.00123	0.0381	0		0 (0)	1	1	0.00123	0.0381
482	Silver	Ag+ 06h	Up	Regulation of RAS by GAPs	Reactome	6	ENSG00000188766;ENSG00000170315;ENSG00000150991;ENSG00000075391;ENSG00000213281;ENSG00000198369	21 (25)	0.00126	0.0387	0		0 (2)	1	1	0.00126	0.0387
483	Silver	Ag+ 06h	Up	Regulation of HSF1-mediated heat shock response	Reactome	15	ENSG00000105993;ENSG00000149257;ENSG00000204388;ENSG00000204390;ENSG00000204389;ENSG00000112110;ENSG00000225217;ENSG00000004478;ENSG00000113013;ENSG00000170315;ENSG00000106211;ENSG00000160570;ENSG00000132002;ENSG00000120694;ENSG00000151929	77 (81)	5.32e-05	0.00589	0		2 (7)	1	1	0.000577	0.0402
484	Silver	Ag+ 06h	Up	Synthesis of epoxy (EET) and dihydroxyeicosatrienoic acids (DHET)	Reactome	0		2 (8)	1	1	4	HMDB02311;HMDB02343;HMDB02265;HMDB02314	4 (15)	6.23e-05	0.0924	0.000665	0.0415
485	Silver	Ag+ 06h	Up	Arachidonate Epoxygenase - Epoxide Hydrolase	Wikipathways	0		4 (7)	1	1	4	HMDB02311;HMDB02343;HMDB02265;HMDB02314	4 (9)	6.23e-05	0.0924	0.000665	0.0415
486	Silver	Ag+ 06h	Up	EGF-Ncore	Signalink	10	ENSG00000109270;ENSG00000162734;ENSG00000008294;ENSG00000008735;ENSG00000138166;ENSG00000139318;ENSG00000120129;ENSG00000138834;ENSG00000137834;ENSG00000154447	54 (57)	0.0014	0.0427	0		0 (0)	1	1	0.0014	0.0427
487	Silver	Ag+ 06h	Up	EGF-Core	Signalink	14	ENSG00000136997;ENSG00000162434;ENSG00000034152;ENSG00000134954;ENSG00000177606;ENSG00000107968;ENSG00000113070;ENSG00000175197;ENSG00000111145;ENSG00000169032;ENSG00000167193;ENSG00000166949;ENSG00000146648;ENSG00000213281	93 (105)	0.00146	0.0436	0		0 (0)	1	1	0.00146	0.0436
488	Silver	Ag+ 06h	Up	Transcriptional misregulation in cancer - Homo sapiens (human)	KEGG	16	ENSG00000136997;ENSG00000178053;ENSG00000169896;ENSG00000115738;ENSG00000175832;ENSG00000056558;ENSG00000104885;ENSG00000023445;ENSG00000147050;ENSG00000119508;ENSG00000175197;ENSG00000109320;ENSG00000139318;ENSG00000172216;ENSG00000132170;ENSG00000159216	114 (180)	0.00148	0.0436	0		0 (0)	1	1	0.00148	0.0436
489	Silver	Ag+ 06h	Up	Oncostatin_M	NetPath	8	ENSG00000162434;ENSG00000089159;ENSG00000171223;ENSG00000109320;ENSG00000100906;ENSG00000172216;ENSG00000145623;ENSG00000184557	37 (39)	0.00148	0.0436	0		0 (0)	1	1	0.00148	0.0436
490	Silver	Ag+ 06h	Up	Fc epsilon receptor (FCERI) signaling	Reactome	30	ENSG00000162434;ENSG00000113575;ENSG00000104695;ENSG00000177606;ENSG00000170315;ENSG00000150991;ENSG00000123908;ENSG00000213281;ENSG00000221823;ENSG00000213658;ENSG00000101255;ENSG00000146648;ENSG00000171608;ENSG00000113070;ENSG00000120129;ENSG00000198369;ENSG00000109320;ENSG00000138166;ENSG00000100906;ENSG00000081913;ENSG00000109270;ENSG00000143398;ENSG00000139318;ENSG00000142867;ENSG00000077782…	232 (394)	7.39e-05	0.00742	0		4 (28)	1	1	0.000777	0.0448
491	Silver	Ag+ 06h	Up	Toll Like Receptor 3 (TLR3) Cascade	Reactome	16	ENSG00000169032;ENSG00000034152;ENSG00000134070;ENSG00000110330;ENSG00000023445;ENSG00000113575;ENSG00000104695;ENSG00000177606;ENSG00000107968;ENSG00000100906;ENSG00000170315;ENSG00000150991;ENSG00000109320;ENSG00000077150;ENSG00000139318;ENSG00000109332	89 (101)	8.37e-05	0.00786	0		1 (11)	1	1	0.000869	0.0448
492	Silver	Ag+ 06h	Up	TRIF-mediated TLR3/TLR4 signaling	Reactome	16	ENSG00000169032;ENSG00000034152;ENSG00000134070;ENSG00000110330;ENSG00000023445;ENSG00000113575;ENSG00000104695;ENSG00000177606;ENSG00000107968;ENSG00000100906;ENSG00000170315;ENSG00000150991;ENSG00000109320;ENSG00000077150;ENSG00000139318;ENSG00000109332	89 (101)	8.37e-05	0.00786	0		1 (11)	1	1	0.000869	0.0448
493	Silver	Ag+ 06h	Up	MyD88-independent TLR3/TLR4 cascade	Reactome	16	ENSG00000169032;ENSG00000034152;ENSG00000134070;ENSG00000110330;ENSG00000023445;ENSG00000113575;ENSG00000104695;ENSG00000177606;ENSG00000107968;ENSG00000100906;ENSG00000170315;ENSG00000150991;ENSG00000109320;ENSG00000077150;ENSG00000139318;ENSG00000109332	89 (101)	8.37e-05	0.00786	0		1 (11)	1	1	0.000869	0.0448
494	Silver	Ag+ 06h	Up	Mineral absorption - Homo sapiens (human)	KEGG	9	ENSG00000170385;ENSG00000205362;ENSG00000169688;ENSG00000198417;ENSG00000125144;ENSG00000187193;ENSG00000125148;ENSG00000100292;ENSG00000167996	33 (52)	0.000115	0.0095	1	HMDB00168	15 (29)	0.769	1	0.000915	0.0449
495	Silver	Ag+ 06h	Up	Arachidonic acid metabolism - Homo sapiens (human)	KEGG	0		28 (62)	1	1	5	HMDB02995;HMDB02343;HMDB02265;HMDB02311;HMDB02314	7 (75)	9.55e-05	0.0924	0.00098	0.0449
496	Silver	Ag+ 06h	Up	Estrogen signaling pathway - Homo sapiens (human)	KEGG	14	ENSG00000146648;ENSG00000204389;ENSG00000204388;ENSG00000204390;ENSG00000177606;ENSG00000171608;ENSG00000004478;ENSG00000146592;ENSG00000128272;ENSG00000080824;ENSG00000169032;ENSG00000113070;ENSG00000213281;ENSG00000096384	72 (100)	9.6e-05	0.00846	0		3 (9)	1	1	0.000984	0.0449
497	Silver	Ag+ 06h	Up	Prolonged ERK activation events	Reactome	21	ENSG00000213658;ENSG00000150991;ENSG00000146648;ENSG00000075391;ENSG00000188766;ENSG00000109270;ENSG00000162734;ENSG00000113575;ENSG00000104695;ENSG00000169032;ENSG00000113070;ENSG00000138166;ENSG00000170315;ENSG00000120129;ENSG00000077782;ENSG00000167193;ENSG00000107263;ENSG00000139318;ENSG00000162434;ENSG00000213281;ENSG00000198369	139 (207)	0.0001	0.00865	0		3 (19)	1	1	0.00102	0.0449
498	Silver	Ag+ 06h	Up	Neural Crest Differentiation	Wikipathways	11	ENSG00000109099;ENSG00000134954;ENSG00000197971;ENSG00000136997;ENSG00000139800;ENSG00000077150;ENSG00000077782;ENSG00000109320;ENSG00000124216;ENSG00000168036;ENSG00000108840	64 (101)	0.00156	0.0452	0		0 (0)	1	1	0.00156	0.0452
499	Silver	Ag+ 06h	Up	Validated targets of C-MYC transcriptional repression	PID	10	ENSG00000136997;ENSG00000185650;ENSG00000115738;ENSG00000120885;ENSG00000116717;ENSG00000175197;ENSG00000104332;ENSG00000166949;ENSG00000104419;ENSG00000167996	55 (75)	0.00163	0.0462	0		0 (0)	1	1	0.00163	0.0462
500	Silver	Ag+ 06h	Up	miR-targeted genes in muscle cell - TarBase	Wikipathways	33	ENSG00000111371;ENSG00000134294;ENSG00000132002;ENSG00000072682;ENSG00000135069;ENSG00000006652;ENSG00000033627;ENSG00000172216;ENSG00000100292;ENSG00000113732;ENSG00000142871;ENSG00000146648;ENSG00000065911;ENSG00000167601;ENSG00000131018;ENSG00000110880;ENSG00000115310;ENSG00000159176;ENSG00000109270;ENSG00000143384;ENSG00000106615;ENSG00000164171;ENSG00000166471;ENSG00000120889;ENSG00000110172…	315 (398)	0.00163	0.0462	0		0 (0)	1	1	0.00163	0.0462
501	Silver	Ag+ 06h	Up	Regulation of TNFR1 signaling	Reactome	6	ENSG00000083799;ENSG00000110330;ENSG00000023445;ENSG00000056558;ENSG00000127191;ENSG00000118503	22 (23)	0.00164	0.0463	0		0 (2)	1	1	0.00164	0.0463
502	Silver	Ag+ 06h	Up	Degradation of beta-catenin by the destruction complex	Reactome	8	ENSG00000136997;ENSG00000113712;ENSG00000113575;ENSG00000104695;ENSG00000170315;ENSG00000150991;ENSG00000081059;ENSG00000168036	38 (39)	0.00178	0.049	0		0 (2)	1	1	0.00178	0.049
503	Silver	Ag+ 06h	Down	Cell Cycle	Reactome	68	ENSG00000112984;ENSG00000111206;ENSG00000171320;ENSG00000111276;ENSG00000169679;ENSG00000087586;ENSG00000161888;ENSG00000149554;ENSG00000080839;ENSG00000136122;ENSG00000137807;ENSG00000136492;ENSG00000109805;ENSG00000168496;ENSG00000152253;ENSG00000164053;ENSG00000113368;ENSG00000115163;ENSG00000149503;ENSG00000072864;ENSG00000117724;ENSG00000128731;ENSG00000145386;ENSG00000157456;ENSG00000006634…	488 (551)	9.82e-19	4.24e-15	0		6 (32)	1	1	4.17e-17	5.22e-14
504	Silver	Ag+ 06h	Down	Retinoblastoma (RB) in Cancer	Wikipathways	27	ENSG00000176890;ENSG00000111276;ENSG00000253729;ENSG00000116062;ENSG00000011426;ENSG00000157456;ENSG00000101945;ENSG00000136824;ENSG00000080503;ENSG00000138376;ENSG00000090889;ENSG00000164104;ENSG00000117632;ENSG00000170312;ENSG00000149554;ENSG00000167325;ENSG00000171848;ENSG00000101224;ENSG00000132383;ENSG00000112742;ENSG00000112118;ENSG00000131747;ENSG00000185104;ENSG00000141510;ENSG00000132646…	86 (89)	8.14e-17	1.17e-13	0		0 (0)	1	1	8.14e-17	1.17e-13
505	Silver	Ag+ 06h	Down	Cell Cycle_ Mitotic	Reactome	60	ENSG00000112984;ENSG00000111206;ENSG00000171320;ENSG00000111276;ENSG00000169679;ENSG00000087586;ENSG00000161888;ENSG00000080839;ENSG00000136122;ENSG00000137807;ENSG00000109805;ENSG00000168496;ENSG00000113368;ENSG00000115163;ENSG00000149503;ENSG00000072864;ENSG00000117724;ENSG00000123080;ENSG00000157456;ENSG00000006634;ENSG00000075188;ENSG00000075218;ENSG00000132182;ENSG00000117399;ENSG00000156970…	413 (468)	1.99e-17	4.3e-14	0		6 (29)	1	1	7.86e-16	4.92e-13
506	Silver	Ag+ 06h	Down	Aurora B signaling	PID	18	ENSG00000112984;ENSG00000136824;ENSG00000115163;ENSG00000149503;ENSG00000121152;ENSG00000087586;ENSG00000134690;ENSG00000178999;ENSG00000161800;ENSG00000094916;ENSG00000147526;ENSG00000137807;ENSG00000117632;ENSG00000109805;ENSG00000169679;ENSG00000142945;ENSG00000065534;ENSG00000010292	38 (43)	2.66e-15	2.87e-12	0		0 (2)	1	1	2.66e-15	2.87e-12
507	Silver	Ag+ 06h	Down	Cell Cycle	Wikipathways	22	ENSG00000111276;ENSG00000253729;ENSG00000157456;ENSG00000135336;ENSG00000080839;ENSG00000006634;ENSG00000169679;ENSG00000156970;ENSG00000112118;ENSG00000166851;ENSG00000170312;ENSG00000149554;ENSG00000065328;ENSG00000117399;ENSG00000101224;ENSG00000158402;ENSG00000135476;ENSG00000128245;ENSG00000141510;ENSG00000132646;ENSG00000145386;ENSG00000134057	96 (103)	6.92e-11	5.97e-08	0		0 (0)	1	1	6.92e-11	5.97e-08
508	Silver	Ag+ 06h	Down	PLK1 signaling events	PID	15	ENSG00000112984;ENSG00000161888;ENSG00000101224;ENSG00000158402;ENSG00000087586;ENSG00000134057;ENSG00000136811;ENSG00000149503;ENSG00000166851;ENSG00000170312;ENSG00000136122;ENSG00000169679;ENSG00000156970;ENSG00000088325;ENSG00000117399	44 (44)	1.82e-10	1.12e-07	0		0 (1)	1	1	1.82e-10	1.12e-07
509	Silver	Ag+ 06h	Down	Cell cycle - Homo sapiens (human)	KEGG	23	ENSG00000111276;ENSG00000123080;ENSG00000149554;ENSG00000080839;ENSG00000135336;ENSG00000157456;ENSG00000006634;ENSG00000169679;ENSG00000156970;ENSG00000112118;ENSG00000158402;ENSG00000170312;ENSG00000117399;ENSG00000101224;ENSG00000166851;ENSG00000135476;ENSG00000253729;ENSG00000112742;ENSG00000128245;ENSG00000141510;ENSG00000132646;ENSG00000145386;ENSG00000134057	113 (124)	3.25e-10	1.75e-07	0		0 (0)	1	1	3.25e-10	1.75e-07
510	Silver	Ag+ 06h	Down	Mitotic Prometaphase	Reactome	23	ENSG00000161888;ENSG00000109805;ENSG00000115163;ENSG00000149503;ENSG00000072864;ENSG00000117724;ENSG00000157456;ENSG00000075188;ENSG00000169679;ENSG00000156970;ENSG00000010292;ENSG00000175216;ENSG00000170312;ENSG00000117399;ENSG00000136824;ENSG00000166851;ENSG00000121152;ENSG00000134690;ENSG00000178999;ENSG00000152253;ENSG00000137812;ENSG00000134057;ENSG00000142945	109 (113)	1.51e-10	1.09e-07	0		1 (6)	1	1	3.57e-09	1.49e-06
511	Silver	Ag+ 06h	Down	Cell Cycle Checkpoints	Reactome	23	ENSG00000111276;ENSG00000170312;ENSG00000136492;ENSG00000164053;ENSG00000065328;ENSG00000135336;ENSG00000157456;ENSG00000006634;ENSG00000075218;ENSG00000156970;ENSG00000138376;ENSG00000188486;ENSG00000112118;ENSG00000149554;ENSG00000128731;ENSG00000117399;ENSG00000158402;ENSG00000132383;ENSG00000128245;ENSG00000171792;ENSG00000141510;ENSG00000145386;ENSG00000134057	131 (158)	6.77e-09	2.92e-06	0		0 (3)	1	1	6.77e-09	2.92e-06
512	Silver	Ag+ 06h	Down	G2/M Checkpoints	Reactome	19	ENSG00000158402;ENSG00000138376;ENSG00000132383;ENSG00000188486;ENSG00000128245;ENSG00000128731;ENSG00000149554;ENSG00000112118;ENSG00000157456;ENSG00000006634;ENSG00000171792;ENSG00000135336;ENSG00000141510;ENSG00000136492;ENSG00000170312;ENSG00000075218;ENSG00000134057;ENSG00000065328;ENSG00000164053	96 (121)	1.9e-08	7.47e-06	0		0 (3)	1	1	1.9e-08	7.47e-06
513	Silver	Ag+ 06h	Down	M Phase	Reactome	32	ENSG00000112984;ENSG00000161888;ENSG00000137807;ENSG00000109805;ENSG00000113368;ENSG00000115163;ENSG00000149503;ENSG00000072864;ENSG00000117724;ENSG00000157456;ENSG00000075188;ENSG00000132182;ENSG00000169679;ENSG00000152253;ENSG00000010292;ENSG00000175216;ENSG00000188486;ENSG00000120802;ENSG00000126883;ENSG00000170312;ENSG00000117399;ENSG00000136824;ENSG00000166851;ENSG00000135476;ENSG00000121152…	221 (267)	1.17e-09	5.59e-07	0		6 (18)	1	1	2.51e-08	7.86e-06
514	Silver	Ag+ 06h	Down	Aurora A signaling	PID	11	ENSG00000175216;ENSG00000101224;ENSG00000087586;ENSG00000178999;ENSG00000115163;ENSG00000142208;ENSG00000147526;ENSG00000141510;ENSG00000126787;ENSG00000013810;ENSG00000088325	31 (31)	3.2e-08	1.15e-05	0		0 (0)	1	1	3.2e-08	1.15e-05
515	Silver	Ag+ 06h	Down	Resolution of Sister Chromatid Cohesion	Reactome	19	ENSG00000161888;ENSG00000115163;ENSG00000149503;ENSG00000072864;ENSG00000156970;ENSG00000134690;ENSG00000142945;ENSG00000134057;ENSG00000157456;ENSG00000075188;ENSG00000166851;ENSG00000175216;ENSG00000170312;ENSG00000117724;ENSG00000137812;ENSG00000169679;ENSG00000178999;ENSG00000152253;ENSG00000117399	100 (104)	3.83e-08	1.27e-05	0		1 (6)	1	1	6.92e-07	0.000173
516	Silver	Ag+ 06h	Down	Integrated Pancreatic Cancer Pathway	Wikipathways	21	ENSG00000167325;ENSG00000184937;ENSG00000158402;ENSG00000101076;ENSG00000133703;ENSG00000131747;ENSG00000166851;ENSG00000176890;ENSG00000173402;ENSG00000142208;ENSG00000137801;ENSG00000111276;ENSG00000115415;ENSG00000117632;ENSG00000132646;ENSG00000145386;ENSG00000077092;ENSG00000080839;ENSG00000156970;ENSG00000115904;ENSG00000141510	142 (170)	6.44e-07	0.000174	0		0 (0)	1	1	6.44e-07	0.000174
517	Silver	Ag+ 06h	Down	Kinesins	Reactome	10	ENSG00000112984;ENSG00000101350;ENSG00000161800;ENSG00000090889;ENSG00000138182;ENSG00000137807;ENSG00000138160;ENSG00000237649;ENSG00000079616;ENSG00000142945	35 (43)	1.37e-06	0.00027	0		0 (0)	1	1	1.37e-06	0.00027
518	Silver	Ag+ 06h	Down	FOXM1 transcription factor network	PID	10	ENSG00000111206;ENSG00000101224;ENSG00000166851;ENSG00000117724;ENSG00000157456;ENSG00000115163;ENSG00000170312;ENSG00000145386;ENSG00000134057;ENSG00000178999	36 (43)	1.83e-06	0.000343	0		0 (0)	1	1	1.83e-06	0.000343
519	Silver	Ag+ 06h	Down	The role of GTSE1 in G2/M progression after G2 checkpoint	Reactome	6	ENSG00000166851;ENSG00000157456;ENSG00000141510;ENSG00000170312;ENSG00000075218;ENSG00000134057	11 (11)	2.37e-06	0.000427	0		0 (2)	1	1	2.37e-06	0.000427
520	Silver	Ag+ 06h	Down	MicroRNAs in cancer - Homo sapiens (human)	KEGG	19	ENSG00000140416;ENSG00000101224;ENSG00000111276;ENSG00000137807;ENSG00000133703;ENSG00000137801;ENSG00000138061;ENSG00000198793;ENSG00000122861;ENSG00000065361;ENSG00000277443;ENSG00000169047;ENSG00000141510;ENSG00000074181;ENSG00000113328;ENSG00000117632;ENSG00000158402;ENSG00000115904;ENSG00000068078	130 (299)	2.66e-06	0.000441	0		0 (0)	1	1	2.66e-06	0.000441
521	Silver	Ag+ 06h	Down	Condensation of Prometaphase Chromosomes	Reactome	7	ENSG00000136824;ENSG00000121152;ENSG00000170312;ENSG00000157456;ENSG00000109805;ENSG00000134057;ENSG00000010292	12 (12)	1.72e-07	5.3e-05	0		1 (4)	1	1	2.85e-06	0.000594
522	Silver	Ag+ 06h	Down	TP53 Regulates Transcription of Genes Involved in G2 Cell Cycle Arrest	Reactome	7	ENSG00000158402;ENSG00000087586;ENSG00000170312;ENSG00000080839;ENSG00000141510;ENSG00000132646;ENSG00000134057	18 (19)	5.51e-06	0.000821	0		0 (0)	1	1	5.51e-06	0.000821
523	Silver	Ag+ 06h	Down	Signaling by Rho GTPases	Reactome	36	ENSG00000161888;ENSG00000111276;ENSG00000140396;ENSG00000183856;ENSG00000065534;ENSG00000198668;ENSG00000115163;ENSG00000149503;ENSG00000072864;ENSG00000117724;ENSG00000160014;ENSG00000196220;ENSG00000075188;ENSG00000072422;ENSG00000169679;ENSG00000156970;ENSG00000175216;ENSG00000188486;ENSG00000161800;ENSG00000118193;ENSG00000166851;ENSG00000266028;ENSG00000160007;ENSG00000117399;ENSG00000198826…	341 (434)	4.81e-07	0.000139	0		4 (27)	1	1	7.48e-06	0.00134
524	Silver	Ag+ 06h	Down	G2/M DNA damage checkpoint	Reactome	13	ENSG00000158402;ENSG00000138376;ENSG00000132383;ENSG00000188486;ENSG00000149554;ENSG00000128245;ENSG00000171792;ENSG00000141510;ENSG00000136492;ENSG00000170312;ENSG00000134057;ENSG00000128731;ENSG00000164053	72 (97)	1.01e-05	0.0014	0		0 (3)	1	1	1.01e-05	0.0014
525	Silver	Ag+ 06h	Down	G2/M Transition	Reactome	20	ENSG00000175216;ENSG00000101224;ENSG00000158402;ENSG00000072864;ENSG00000087586;ENSG00000111206;ENSG00000136861;ENSG00000157456;ENSG00000136122;ENSG00000141577;ENSG00000166851;ENSG00000141510;ENSG00000072571;ENSG00000170312;ENSG00000075218;ENSG00000117724;ENSG00000145386;ENSG00000134057;ENSG00000136811;ENSG00000088325	131 (136)	7.11e-07	0.000181	0		1 (5)	1	1	1.08e-05	0.0016
526	Silver	Ag+ 06h	Down	Signal Transduction	Reactome	94	ENSG00000111276;ENSG00000065361;ENSG00000172572;ENSG00000065534;ENSG00000119487;ENSG00000115163;ENSG00000149503;ENSG00000072864;ENSG00000117724;ENSG00000163083;ENSG00000173898;ENSG00000152253;ENSG00000175216;ENSG00000205213;ENSG00000169047;ENSG00000149554;ENSG00000198826;ENSG00000134690;ENSG00000162104;ENSG00000115415;ENSG00000065325;ENSG00000099250;ENSG00000120899;ENSG00000143799;ENSG00000138835…	1361 (2538)	8.13e-07	0.000195	1	HMDB01372	52 (254)	0.936	1	1.15e-05	0.0016
527	Silver	Ag+ 06h	Down	Mitotic G2-G2/M phases	Reactome	20	ENSG00000175216;ENSG00000101224;ENSG00000158402;ENSG00000072864;ENSG00000087586;ENSG00000111206;ENSG00000136861;ENSG00000157456;ENSG00000136122;ENSG00000141577;ENSG00000166851;ENSG00000141510;ENSG00000072571;ENSG00000170312;ENSG00000075218;ENSG00000117724;ENSG00000145386;ENSG00000134057;ENSG00000136811;ENSG00000088325	133 (138)	9.11e-07	0.000207	0		1 (5)	1	1	1.36e-05	0.00162
528	Silver	Ag+ 06h	Down	RHO GTPase Effectors	Reactome	28	ENSG00000161888;ENSG00000111276;ENSG00000140396;ENSG00000065534;ENSG00000198668;ENSG00000115163;ENSG00000149503;ENSG00000072864;ENSG00000117724;ENSG00000160014;ENSG00000178999;ENSG00000075188;ENSG00000169679;ENSG00000152253;ENSG00000175216;ENSG00000188486;ENSG00000118193;ENSG00000166851;ENSG00000266028;ENSG00000156970;ENSG00000117399;ENSG00000158402;ENSG00000134690;ENSG00000122966;ENSG00000128245…	236 (299)	9.61e-07	0.000208	0		4 (27)	1	1	1.43e-05	0.00162
529	Silver	Ag+ 06h	Down	Separation of Sister Chromatids	Reactome	17	ENSG00000161888;ENSG00000115163;ENSG00000149503;ENSG00000072864;ENSG00000156970;ENSG00000134690;ENSG00000142945;ENSG00000117724;ENSG00000075188;ENSG00000166851;ENSG00000175216;ENSG00000135476;ENSG00000137812;ENSG00000169679;ENSG00000178999;ENSG00000152253;ENSG00000117399	119 (124)	1.22e-05	0.00165	0		0 (2)	1	1	1.22e-05	0.00165
530	Silver	Ag+ 06h	Down	Cyclin A/B1 associated events during G2/M transition	Reactome	8	ENSG00000111206;ENSG00000101224;ENSG00000158402;ENSG00000157456;ENSG00000166851;ENSG00000170312;ENSG00000145386;ENSG00000134057	21 (22)	1.37e-06	0.00027	0		1 (4)	1	1	1.99e-05	0.00208
531	Silver	Ag+ 06h	Down	Primary Focal Segmental Glomerulosclerosis FSGS	Wikipathways	11	ENSG00000148773;ENSG00000184937;ENSG00000111276;ENSG00000173402;ENSG00000081052;ENSG00000070018;ENSG00000152818;ENSG00000132470;ENSG00000142208;ENSG00000101384;ENSG00000132646	58 (73)	3.02e-05	0.00352	0		0 (3)	1	1	3.02e-05	0.00352
532	Silver	Ag+ 06h	Down	Mitotic Anaphase	Reactome	19	ENSG00000113368;ENSG00000115163;ENSG00000149503;ENSG00000072864;ENSG00000156970;ENSG00000134690;ENSG00000120802;ENSG00000142945;ENSG00000117724;ENSG00000075188;ENSG00000161888;ENSG00000166851;ENSG00000175216;ENSG00000135476;ENSG00000137812;ENSG00000169679;ENSG00000178999;ENSG00000152253;ENSG00000117399	130 (135)	2.66e-06	0.000441	0		1 (4)	1	1	3.68e-05	0.00354
533	Silver	Ag+ 06h	Down	Mitotic Metaphase and Anaphase	Reactome	19	ENSG00000113368;ENSG00000115163;ENSG00000149503;ENSG00000072864;ENSG00000156970;ENSG00000134690;ENSG00000120802;ENSG00000142945;ENSG00000117724;ENSG00000075188;ENSG00000161888;ENSG00000166851;ENSG00000175216;ENSG00000135476;ENSG00000137812;ENSG00000169679;ENSG00000178999;ENSG00000152253;ENSG00000117399	131 (136)	2.99e-06	0.000478	0		1 (4)	1	1	4.1e-05	0.00366
534	Silver	Ag+ 06h	Down	Polo-like kinase mediated events	Reactome	6	ENSG00000111206;ENSG00000158402;ENSG00000117724;ENSG00000157456;ENSG00000166851;ENSG00000134057	16 (17)	3.42e-05	0.00379	0		0 (2)	1	1	3.42e-05	0.00379
535	Silver	Ag+ 06h	Down	G1 to S cell cycle control	Wikipathways	11	ENSG00000014138;ENSG00000111276;ENSG00000132383;ENSG00000123080;ENSG00000135336;ENSG00000112118;ENSG00000080839;ENSG00000141510;ENSG00000170312;ENSG00000132646;ENSG00000134057	60 (68)	4.2e-05	0.00453	0		0 (0)	1	1	4.2e-05	0.00453
536	Silver	Ag+ 06h	Down	E2F transcription factor network	PID	12	ENSG00000167325;ENSG00000171848;ENSG00000176890;ENSG00000111276;ENSG00000123080;ENSG00000112118;ENSG00000094916;ENSG00000080839;ENSG00000122861;ENSG00000080503;ENSG00000170312;ENSG00000145386	71 (79)	4.41e-05	0.00453	0		0 (2)	1	1	4.41e-05	0.00453
537	Silver	Ag+ 06h	Down	miR-targeted genes in epithelium - TarBase	Wikipathways	26	ENSG00000140416;ENSG00000176890;ENSG00000111276;ENSG00000113328;ENSG00000133703;ENSG00000163513;ENSG00000138061;ENSG00000185215;ENSG00000132470;ENSG00000111530;ENSG00000141429;ENSG00000129515;ENSG00000167670;ENSG00000136485;ENSG00000117906;ENSG00000176619;ENSG00000166851;ENSG00000134852;ENSG00000174437;ENSG00000160710;ENSG00000183856;ENSG00000118898;ENSG00000074410;ENSG00000178999;ENSG00000099250…	258 (330)	4.51e-05	0.00453	0		0 (0)	1	1	4.51e-05	0.00453
538	Silver	Ag+ 06h	Down	Phosphorylation of Emi1	Reactome	4	ENSG00000134057;ENSG00000166851;ENSG00000117399;ENSG00000170312	6 (6)	4.76e-05	0.00468	0		0 (2)	1	1	4.76e-05	0.00468
539	Silver	Ag+ 06h	Down	DNA Replication	Reactome	12	ENSG00000014138;ENSG00000111276;ENSG00000132383;ENSG00000135336;ENSG00000112118;ENSG00000101003;ENSG00000006634;ENSG00000132646;ENSG00000145386;ENSG00000065328;ENSG00000168496;ENSG00000131153	58 (60)	5.09e-06	0.000785	0		1 (14)	1	1	6.71e-05	0.0056
540	Silver	Ag+ 06h	Down	Integrins in angiogenesis	PID	10	ENSG00000111276;ENSG00000081052;ENSG00000163513;ENSG00000130635;ENSG00000204262;ENSG00000115884;ENSG00000142208;ENSG00000169047;ENSG00000120899;ENSG00000115414	52 (66)	6.13e-05	0.00576	0		0 (2)	1	1	6.13e-05	0.00576
541	Silver	Ag+ 06h	Down	RHO GTPases Activate Formins	Reactome	17	ENSG00000161888;ENSG00000115163;ENSG00000149503;ENSG00000072864;ENSG00000156970;ENSG00000134690;ENSG00000142945;ENSG00000117724;ENSG00000075188;ENSG00000166851;ENSG00000266028;ENSG00000175216;ENSG00000137812;ENSG00000169679;ENSG00000178999;ENSG00000152253;ENSG00000117399	114 (118)	6.8e-06	0.000979	0		1 (7)	1	1	8.77e-05	0.00686
542	Silver	Ag+ 06h	Down	Synthesis of DNA	Reactome	10	ENSG00000014138;ENSG00000111276;ENSG00000132383;ENSG00000135336;ENSG00000112118;ENSG00000101003;ENSG00000132646;ENSG00000145386;ENSG00000168496;ENSG00000131153	54 (55)	8.59e-05	0.00719	0		0 (13)	1	1	8.59e-05	0.00719
543	Silver	Ag+ 06h	Down	miR-targeted genes in muscle cell - TarBase	Wikipathways	29	ENSG00000140416;ENSG00000176890;ENSG00000074410;ENSG00000115159;ENSG00000133703;ENSG00000163513;ENSG00000138061;ENSG00000185215;ENSG00000065361;ENSG00000172572;ENSG00000111530;ENSG00000113328;ENSG00000141429;ENSG00000129515;ENSG00000162599;ENSG00000111276;ENSG00000117906;ENSG00000169047;ENSG00000176619;ENSG00000134852;ENSG00000137801;ENSG00000014138;ENSG00000132842;ENSG00000166851;ENSG00000160710…	315 (398)	8.66e-05	0.00719	0		0 (0)	1	1	8.66e-05	0.00719
544	Silver	Ag+ 06h	Down	Chk1/Chk2(Cds1) mediated inactivation of Cyclin B:Cdk1 complex	Reactome	5	ENSG00000134057;ENSG00000158402;ENSG00000128245;ENSG00000170312;ENSG00000149554	12 (12)	8.94e-05	0.00728	0		0 (2)	1	1	8.94e-05	0.00728
545	Silver	Ag+ 06h	Down	cell cycle: g2/m checkpoint	BioCarta	6	ENSG00000253729;ENSG00000170312;ENSG00000128245;ENSG00000141510;ENSG00000149554;ENSG00000134057	19 (22)	0.000104	0.00823	0		0 (0)	1	1	0.000104	0.00823
546	Silver	Ag+ 06h	Down	Activation of NIMA Kinases NEK9_ NEK6_ NEK7	Reactome	4	ENSG00000134057;ENSG00000166851;ENSG00000157456;ENSG00000170312	7 (7)	0.000107	0.00828	0		0 (2)	1	1	0.000107	0.00828
547	Silver	Ag+ 06h	Down	Activation of ATR in response to replication stress	Reactome	8	ENSG00000158402;ENSG00000132383;ENSG00000135336;ENSG00000112118;ENSG00000006634;ENSG00000149554;ENSG00000065328;ENSG00000164053	36 (37)	0.000116	0.00877	0		0 (2)	1	1	0.000116	0.00877
548	Silver	Ag+ 06h	Down	Oncostatin_M	NetPath	8	ENSG00000120899;ENSG00000198793;ENSG00000142208;ENSG00000065361;ENSG00000169047;ENSG00000115415;ENSG00000141510;ENSG00000115904	37 (39)	0.000142	0.0103	0		0 (0)	1	1	0.000142	0.0103
549	Silver	Ag+ 06h	Down	Regulation of cytoplasmic and nuclear SMAD2/3 signaling	PID	6	ENSG00000198668;ENSG00000160014;ENSG00000144677;ENSG00000126883;ENSG00000108424;ENSG00000182481	20 (20)	0.000143	0.0103	0		0 (0)	1	1	0.000143	0.0103
550	Silver	Ag+ 06h	Down	TP53 Regulates Transcription of Cell Cycle Genes	Reactome	9	ENSG00000111276;ENSG00000087586;ENSG00000170312;ENSG00000080839;ENSG00000158402;ENSG00000141510;ENSG00000132646;ENSG00000145386;ENSG00000134057	47 (51)	0.000148	0.0103	0		0 (2)	1	1	0.000148	0.0103
551	Silver	Ag+ 06h	Down	p53 signaling pathway - Homo sapiens (human)	KEGG	10	ENSG00000171848;ENSG00000134574;ENSG00000113328;ENSG00000149554;ENSG00000157456;ENSG00000137801;ENSG00000141510;ENSG00000170312;ENSG00000075218;ENSG00000134057	59 (69)	0.000186	0.0128	0		0 (0)	1	1	0.000186	0.0128
552	Silver	Ag+ 06h	Down	Cyclin B2 mediated events	Reactome	4	ENSG00000101224;ENSG00000158402;ENSG00000157456;ENSG00000170312	5 (5)	1.64e-05	0.00209	0		1 (4)	1	1	0.000198	0.0137
553	Silver	Ag+ 06h	Down	Mitotic G2-G2-M phases	Wikipathways	4	ENSG00000166851;ENSG00000134057;ENSG00000157456;ENSG00000117724	5 (5)	1.64e-05	0.00209	0		1 (5)	1	1	0.000198	0.0137
554	Silver	Ag+ 06h	Down	APC/C-mediated degradation of cell cycle proteins	Reactome	8	ENSG00000166851;ENSG00000087586;ENSG00000170312;ENSG00000145386;ENSG00000134057;ENSG00000178999;ENSG00000156970;ENSG00000117399	39 (41)	0.00021	0.014	0		0 (4)	1	1	0.00021	0.014
555	Silver	Ag+ 06h	Down	Regulation of mitotic cell cycle	Reactome	8	ENSG00000166851;ENSG00000087586;ENSG00000170312;ENSG00000145386;ENSG00000134057;ENSG00000178999;ENSG00000156970;ENSG00000117399	39 (41)	0.00021	0.014	0		0 (4)	1	1	0.00021	0.014
556	Silver	Ag+ 06h	Down	miRNA Regulation of DNA Damage Response	Wikipathways	12	ENSG00000111276;ENSG00000113328;ENSG00000188486;ENSG00000253729;ENSG00000134574;ENSG00000157456;ENSG00000158402;ENSG00000141510;ENSG00000170312;ENSG00000149554;ENSG00000134057;ENSG00000164053	66 (89)	2.06e-05	0.00254	0		1 (2)	1	1	0.000243	0.016
557	Silver	Ag+ 06h	Down	Golgi-to-ER retrograde transport	Reactome	15	ENSG00000112984;ENSG00000101350;ENSG00000181789;ENSG00000161800;ENSG00000073969;ENSG00000138182;ENSG00000137807;ENSG00000090889;ENSG00000138160;ENSG00000237649;ENSG00000079616;ENSG00000142945;ENSG00000141429;ENSG00000160216;ENSG00000264364	101 (111)	2.49e-05	0.00299	0		3 (10)	1	1	0.000289	0.0181
558	Silver	Ag+ 06h	Down	DNA strand elongation	Reactome	7	ENSG00000014138;ENSG00000132383;ENSG00000131153;ENSG00000112118;ENSG00000101003;ENSG00000132646;ENSG00000168496	32 (32)	0.000346	0.022	0		0 (6)	1	1	0.000346	0.022
559	Silver	Ag+ 06h	Down	DNA Double-Strand Break Repair	Reactome	18	ENSG00000051341;ENSG00000138376;ENSG00000132383;ENSG00000188486;ENSG00000149554;ENSG00000143799;ENSG00000171792;ENSG00000188827;ENSG00000111602;ENSG00000164053;ENSG00000136492;ENSG00000253729;ENSG00000132646;ENSG00000145386;ENSG00000128731;ENSG00000168496;ENSG00000182481;ENSG00000141510	141 (171)	3.27e-05	0.00372	0		3 (14)	1	1	0.000371	0.0221
560	Silver	Ag+ 06h	Down	Nuclear Envelope Breakdown	Reactome	10	ENSG00000113368;ENSG00000166851;ENSG00000120802;ENSG00000157456;ENSG00000075188;ENSG00000126883;ENSG00000170312;ENSG00000132182;ENSG00000134057;ENSG00000155561	50 (51)	4.3e-05	0.00453	0		3 (7)	1	1	0.000475	0.027
561	Silver	Ag+ 06h	Down	Oocyte meiosis - Homo sapiens (human)	KEGG	14	ENSG00000198668;ENSG00000169679;ENSG00000135476;ENSG00000087586;ENSG00000166851;ENSG00000160014;ENSG00000128245;ENSG00000157456;ENSG00000148660;ENSG00000162104;ENSG00000170312;ENSG00000134057;ENSG00000158402;ENSG00000117399	95 (124)	5.06e-05	0.00486	0		1 (4)	1	1	0.000551	0.03
562	Silver	Ag+ 06h	Down	Nuclear Pore Complex (NPC) Disassembly	Reactome	7	ENSG00000157456;ENSG00000075188;ENSG00000126883;ENSG00000170312;ENSG00000132182;ENSG00000134057;ENSG00000155561	34 (34)	0.000513	0.0312	0		0 (2)	1	1	0.000513	0.0312
563	Silver	Ag+ 06h	Down	regulation of cell cycle progression by plk3	BioCarta	5	ENSG00000149554;ENSG00000134057;ENSG00000128245;ENSG00000170312;ENSG00000141510	17 (18)	0.000584	0.035	0		0 (0)	1	1	0.000584	0.035
564	Silver	Ag+ 06h	Down	COPI-dependent Golgi-to-ER retrograde traffic	Reactome	12	ENSG00000112984;ENSG00000101350;ENSG00000181789;ENSG00000161800;ENSG00000073969;ENSG00000138182;ENSG00000137807;ENSG00000090889;ENSG00000138160;ENSG00000237649;ENSG00000079616;ENSG00000142945	74 (83)	6.72e-05	0.00605	0		1 (4)	1	1	0.000713	0.0357
565	Silver	Ag+ 06h	Down	DNA Damage Response	Wikipathways	11	ENSG00000158402;ENSG00000188486;ENSG00000253729;ENSG00000170312;ENSG00000157456;ENSG00000134574;ENSG00000111276;ENSG00000141510;ENSG00000149554;ENSG00000134057;ENSG00000164053	63 (68)	6.72e-05	0.00605	0		1 (2)	1	1	0.000713	0.0357
566	Silver	Ag+ 06h	Down	Mitotic G1-G1/S phases	Reactome	13	ENSG00000014138;ENSG00000111276;ENSG00000132383;ENSG00000123080;ENSG00000135336;ENSG00000112118;ENSG00000080839;ENSG00000006634;ENSG00000142208;ENSG00000170312;ENSG00000145386;ENSG00000134057;ENSG00000065328	86 (92)	7.16e-05	0.00631	0		1 (4)	1	1	0.000755	0.0363
567	Silver	Ag+ 06h	Down	Beta3 integrin cell surface interactions	PID	7	ENSG00000171560;ENSG00000081052;ENSG00000163513;ENSG00000115884;ENSG00000122861;ENSG00000137801;ENSG00000115414	35 (43)	0.000618	0.0365	0		0 (3)	1	1	0.000618	0.0365
568	Silver	Ag+ 06h	Down	Intra-Golgi and retrograde Golgi-to-ER traffic	Reactome	19	ENSG00000112984;ENSG00000101350;ENSG00000181789;ENSG00000090889;ENSG00000133103;ENSG00000073969;ENSG00000161800;ENSG00000049245;ENSG00000138182;ENSG00000137807;ENSG00000066455;ENSG00000237649;ENSG00000138160;ENSG00000198162;ENSG00000079616;ENSG00000142945;ENSG00000141429;ENSG00000160216;ENSG00000264364	164 (181)	7.71e-05	0.00666	0		3 (12)	1	1	0.000807	0.0374
569	Silver	Ag+ 06h	Down	ECM-receptor interaction - Homo sapiens (human)	KEGG	8	ENSG00000142798;ENSG00000173402;ENSG00000081052;ENSG00000132470;ENSG00000115884;ENSG00000137801;ENSG00000072571;ENSG00000115414	46 (82)	0.000685	0.0395	0		0 (1)	1	1	0.000685	0.0395
570	Silver	Ag+ 06h	Down	O-linked glycosylation	Reactome	10	ENSG00000174684;ENSG00000136378;ENSG00000215182;ENSG00000005108;ENSG00000164574;ENSG00000137801;ENSG00000117983;ENSG00000136542;ENSG00000141429;ENSG00000173402	69 (117)	0.000687	0.0395	0		0 (18)	1	1	0.000687	0.0395
571	Silver	Ag+ 06h	Down	IFN-gamma pathway	PID	7	ENSG00000198668;ENSG00000160014;ENSG00000198793;ENSG00000196730;ENSG00000142208;ENSG00000148660;ENSG00000115415	36 (43)	0.000739	0.0408	0		0 (4)	1	1	0.000739	0.0408
572	Silver	Ag+ 06h	Down	ATR signaling pathway	PID	7	ENSG00000158402;ENSG00000132383;ENSG00000111602;ENSG00000166851;ENSG00000149554;ENSG00000145386;ENSG00000164053	36 (37)	0.000739	0.0408	0		0 (0)	1	1	0.000739	0.0408
573	Silver	Ag+ 06h	Down	G2/M DNA replication checkpoint	Reactome	3	ENSG00000134057;ENSG00000157456;ENSG00000170312	5 (5)	0.000745	0.0408	0		0 (2)	1	1	0.000745	0.0408
574	Silver	Ag+ 06h	Down	cdc25 and chk1 regulatory pathway in response to dna damage	BioCarta	3	ENSG00000170312;ENSG00000128245;ENSG00000149554	5 (7)	0.000745	0.0408	0		0 (0)	1	1	0.000745	0.0408
575	Silver	Ag+ 06h	Down	Oncostatin M Signaling Pathway	Wikipathways	9	ENSG00000111276;ENSG00000133703;ENSG00000120899;ENSG00000198793;ENSG00000142208;ENSG00000169047;ENSG00000115415;ENSG00000141510;ENSG00000115904	59 (65)	0.000867	0.0453	0		0 (0)	1	1	0.000867	0.0453
576	Silver	Ag+ 06h	Down	role of ran in mitotic spindle regulation	BioCarta	4	ENSG00000108424;ENSG00000182481;ENSG00000087586;ENSG00000088325	11 (11)	0.000882	0.0453	0		0 (2)	1	1	0.000882	0.0453
577	Silver	Ag+ 06h	Down	rb tumor suppressor/checkpoint signaling in response to dna damage	BioCarta	4	ENSG00000149554;ENSG00000128245;ENSG00000170312;ENSG00000141510	11 (13)	0.000882	0.0453	0		0 (0)	1	1	0.000882	0.0453
578	Silver	Ag+ 06h	Down	Homology Directed Repair	Reactome	15	ENSG00000051341;ENSG00000138376;ENSG00000132383;ENSG00000188486;ENSG00000132646;ENSG00000143799;ENSG00000171792;ENSG00000188827;ENSG00000111602;ENSG00000136492;ENSG00000149554;ENSG00000145386;ENSG00000128731;ENSG00000168496;ENSG00000164053	114 (142)	0.000105	0.00823	0		2 (10)	1	1	0.00106	0.0476
579	Silver	Ag+ 06h	Down	AURKA Activation by TPX2	Reactome	10	ENSG00000175216;ENSG00000166851;ENSG00000072864;ENSG00000087586;ENSG00000136861;ENSG00000141577;ENSG00000170312;ENSG00000072571;ENSG00000136811;ENSG00000088325	72 (75)	0.000966	0.0491	0		0 (2)	1	1	0.000966	0.0491
580	Silver	Ag+ 24h	Up	Response to metal ions	Reactome	5	ENSG00000205362;ENSG00000125148;ENSG00000187193;ENSG00000198417;ENSG00000125144	6 (12)	6.38e-10	1.38e-06	0		0 (4)	1	1	6.38e-10	1.38e-06
581	Silver	Ag+ 24h	Up	Metallothioneins bind metals	Reactome	5	ENSG00000205362;ENSG00000125148;ENSG00000187193;ENSG00000198417;ENSG00000125144	6 (12)	6.38e-10	1.38e-06	0		0 (4)	1	1	6.38e-10	1.38e-06
582	Silver	Ag+ 24h	Up	ATF4 activates genes	Wikipathways	5	ENSG00000070669;ENSG00000175197;ENSG00000162772;ENSG00000146678;ENSG00000051108	7 (7)	2.22e-09	3.19e-06	0		0 (0)	1	1	2.22e-09	3.19e-06
583	Silver	Ag+ 24h	Up	Attenuation phase	Reactome	7	ENSG00000004478;ENSG00000204389;ENSG00000204388;ENSG00000160570;ENSG00000173110;ENSG00000109971;ENSG00000120694	24 (29)	3.04e-09	3.28e-06	0		0 (2)	1	1	3.04e-09	3.28e-06
584	Silver	Ag+ 24h	Up	HSF1-dependent transactivation	Reactome	7	ENSG00000004478;ENSG00000204389;ENSG00000204388;ENSG00000160570;ENSG00000173110;ENSG00000109971;ENSG00000120694	30 (37)	1.7e-08	1.47e-05	0		0 (4)	1	1	1.7e-08	1.47e-05
585	Silver	Ag+ 24h	Up	Mineral absorption - Homo sapiens (human)	KEGG	7	ENSG00000170385;ENSG00000205362;ENSG00000198417;ENSG00000125144;ENSG00000187193;ENSG00000125148;ENSG00000100292	33 (52)	3.48e-08	2.51e-05	1	HMDB00641	15 (29)	0.269	1	1.82e-07	0.000107
586	Silver	Ag+ 24h	Up	Zinc homeostasis	Wikipathways	6	ENSG00000170385;ENSG00000205362;ENSG00000198417;ENSG00000125144;ENSG00000187193;ENSG00000125148	26 (37)	2.05e-07	0.000126	0		0 (1)	1	1	2.05e-07	0.000126
587	Silver	Ag+ 24h	Up	HSF1 activation	Reactome	6	ENSG00000204389;ENSG00000204388;ENSG00000160570;ENSG00000173110;ENSG00000004478;ENSG00000120694	27 (31)	2.61e-07	0.000141	0		0 (0)	1	1	2.61e-07	0.000141
588	Silver	Ag+ 24h	Up	Photodynamic therapy-induced unfolded protein response	Wikipathways	5	ENSG00000070669;ENSG00000175197;ENSG00000162772;ENSG00000128590;ENSG00000087074	25 (27)	4.84e-06	0.00181	0		0 (0)	1	1	4.84e-06	0.00181
589	Silver	Ag+ 24h	Up	Copper homeostasis	Wikipathways	6	ENSG00000205362;ENSG00000177606;ENSG00000198417;ENSG00000125144;ENSG00000187193;ENSG00000125148	45 (55)	6.18e-06	0.00205	0		0 (2)	1	1	6.18e-06	0.00205
590	Silver	Ag+ 24h	Up	AP-1 transcription factor network	PID	6	ENSG00000120738;ENSG00000177606;ENSG00000162772;ENSG00000125740;ENSG00000120129;ENSG00000125148	50 (71)	1.16e-05	0.00357	0		0 (5)	1	1	1.16e-05	0.00357
591	Silver	Ag+ 24h	Up	Regulation of HSF1-mediated heat shock response	Reactome	8	ENSG00000109971;ENSG00000204389;ENSG00000204388;ENSG00000160570;ENSG00000173110;ENSG00000225217;ENSG00000004478;ENSG00000120694	77 (81)	1.14e-06	0.000546	0		2 (7)	1	1	1.67e-05	0.00492
592	Silver	Ag+ 24h	Up	HIF-1-alpha transcription factor network	PID	6	ENSG00000115738;ENSG00000143384;ENSG00000177606;ENSG00000100292;ENSG00000146678;ENSG00000104419	55 (67)	2.03e-05	0.00583	0		0 (2)	1	1	2.03e-05	0.00583
593	Silver	Ag+ 24h	Up	Protein processing in endoplasmic reticulum - Homo sapiens (human)	KEGG	9	ENSG00000109846;ENSG00000204389;ENSG00000204388;ENSG00000051108;ENSG00000173110;ENSG00000109971;ENSG00000175197;ENSG00000120694;ENSG00000087074	153 (166)	2.7e-05	0.00729	0		0 (6)	1	1	2.7e-05	0.00729
594	Silver	Ag+ 24h	Up	Cellular response to heat stress	Reactome	8	ENSG00000109971;ENSG00000204389;ENSG00000204388;ENSG00000160570;ENSG00000173110;ENSG00000225217;ENSG00000004478;ENSG00000120694	93 (100)	4.82e-06	0.00181	0		2 (9)	1	1	6.38e-05	0.00978
595	Silver	Ag+ 24h	Up	Cellular response to heat stress	Wikipathways	4	ENSG00000004478;ENSG00000120694;ENSG00000160570;ENSG00000173110	12 (16)	5.03e-06	0.00181	0		2 (9)	1	1	6.64e-05	0.00978
596	Silver	Ag+ 24h	Up	Antigen processing and presentation - Homo sapiens (human)	KEGG	5	ENSG00000204388;ENSG00000109971;ENSG00000135047;ENSG00000173110;ENSG00000204389	41 (77)	5.99e-05	0.0144	0		0 (0)	1	1	5.99e-05	0.0144
597	Silver	Ag+ 24h	Up	Longevity regulating pathway - multiple species - Homo sapiens (human)	KEGG	5	ENSG00000109971;ENSG00000204388;ENSG00000109846;ENSG00000173110;ENSG00000204389	53 (64)	0.000208	0.0449	0		0 (2)	1	1	0.000208	0.0449
598	Silver	Ag+ 24h	Up	Direct p53 effectors	PID	8	ENSG00000204389;ENSG00000204388;ENSG00000143384;ENSG00000177606;ENSG00000130513;ENSG00000162772;ENSG00000120129;ENSG00000104419	123 (147)	3.79e-05	0.00962	0		1 (1)	1	1	0.000423	0.0499
599	Silver	Ag+ 24h	Down	Aurora B signaling	PID	9	ENSG00000112984;ENSG00000115163;ENSG00000149503;ENSG00000134690;ENSG00000178999;ENSG00000161800;ENSG00000089220;ENSG00000137807;ENSG00000142945	38 (43)	3.8e-09	5.47e-06	0		0 (2)	1	1	3.8e-09	5.47e-06
600	Silver	Ag+ 24h	Down	M Phase	Reactome	19	ENSG00000112984;ENSG00000234289;ENSG00000115163;ENSG00000149503;ENSG00000135476;ENSG00000188486;ENSG00000113368;ENSG00000164611;ENSG00000142945;ENSG00000134690;ENSG00000157456;ENSG00000161888;ENSG00000166851;ENSG00000137807;ENSG00000175063;ENSG00000134057;ENSG00000178999;ENSG00000152253;ENSG00000112029	221 (267)	7.8e-10	3.37e-06	0		6 (18)	1	1	1.71e-08	1.36e-05
601	Silver	Ag+ 24h	Down	Cell Cycle_ Mitotic	Reactome	25	ENSG00000112984;ENSG00000234289;ENSG00000105173;ENSG00000161888;ENSG00000164611;ENSG00000137807;ENSG00000112029;ENSG00000113368;ENSG00000115163;ENSG00000149503;ENSG00000123080;ENSG00000157456;ENSG00000075218;ENSG00000175063;ENSG00000152253;ENSG00000088325;ENSG00000188486;ENSG00000131153;ENSG00000166851;ENSG00000135476;ENSG00000134690;ENSG00000142945;ENSG00000145386;ENSG00000134057;ENSG00000178999	413 (468)	2.21e-09	4.78e-06	0		6 (29)	1	1	4.63e-08	1.84e-05
602	Silver	Ag+ 24h	Down	Galactose metabolism - Homo sapiens (human)	KEGG	1	ENSG00000198074	23 (31)	0.298	1	6	HMDB00169;HMDB03418;HMDB03345;HMDB00122;HMDB00143;HMDB00211	11 (45)	3.95e-08	5.24e-05	2.27e-07	5.43e-05
603	Silver	Ag+ 24h	Down	Galactose Metabolism	SMPDB	0		10 (13)	1	1	6	HMDB00660;HMDB00169;HMDB03345;HMDB00122;HMDB00143;HMDB00211	10 (36)	1.82e-08	3.62e-05	3.42e-07	5.43e-05
604	Silver	Ag+ 24h	Down	Galactosemia	SMPDB	0		10 (13)	1	1	6	HMDB00660;HMDB00169;HMDB03345;HMDB00122;HMDB00143;HMDB00211	10 (36)	1.82e-08	3.62e-05	3.42e-07	5.43e-05
605	Silver	Ag+ 24h	Down	Cell Cycle	Reactome	25	ENSG00000112984;ENSG00000234289;ENSG00000105173;ENSG00000161888;ENSG00000164611;ENSG00000137807;ENSG00000112029;ENSG00000113368;ENSG00000115163;ENSG00000149503;ENSG00000123080;ENSG00000157456;ENSG00000075218;ENSG00000175063;ENSG00000152253;ENSG00000088325;ENSG00000188486;ENSG00000131153;ENSG00000166851;ENSG00000135476;ENSG00000134690;ENSG00000142945;ENSG00000145386;ENSG00000134057;ENSG00000178999	488 (551)	6.38e-08	6.89e-05	0		6 (32)	1	1	1.12e-06	0.000148
606	Silver	Ag+ 24h	Down	Mitotic Metaphase and Anaphase	Reactome	13	ENSG00000161888;ENSG00000115163;ENSG00000149503;ENSG00000135476;ENSG00000113368;ENSG00000142945;ENSG00000134690;ENSG00000164611;ENSG00000166851;ENSG00000175063;ENSG00000178999;ENSG00000152253;ENSG00000112029	131 (136)	8.3e-08	7.17e-05	0		1 (4)	1	1	1.44e-06	0.000163
607	Silver	Ag+ 24h	Down	PLK1 signaling events	PID	8	ENSG00000112984;ENSG00000161888;ENSG00000149503;ENSG00000166851;ENSG00000134057;ENSG00000112029;ENSG00000088325;ENSG00000198901	44 (44)	2.64e-07	0.00019	0		0 (1)	1	1	2.64e-07	0.00019
608	Silver	Ag+ 24h	Down	FOXM1 transcription factor network	PID	7	ENSG00000115163;ENSG00000166851;ENSG00000105173;ENSG00000157456;ENSG00000145386;ENSG00000134057;ENSG00000178999	36 (43)	9.46e-07	0.000511	0		0 (0)	1	1	9.46e-07	0.000511
609	Silver	Ag+ 24h	Down	APC/C-mediated degradation of cell cycle proteins	Reactome	7	ENSG00000166851;ENSG00000164611;ENSG00000175063;ENSG00000145386;ENSG00000134057;ENSG00000178999;ENSG00000112029	39 (41)	1.68e-06	0.000695	0		0 (4)	1	1	1.68e-06	0.000695
610	Silver	Ag+ 24h	Down	Regulation of mitotic cell cycle	Reactome	7	ENSG00000166851;ENSG00000164611;ENSG00000175063;ENSG00000145386;ENSG00000134057;ENSG00000178999;ENSG00000112029	39 (41)	1.68e-06	0.000695	0		0 (4)	1	1	1.68e-06	0.000695
611	Silver	Ag+ 24h	Down	Separation of Sister Chromatids	Reactome	11	ENSG00000161888;ENSG00000115163;ENSG00000149503;ENSG00000135476;ENSG00000134690;ENSG00000142945;ENSG00000164611;ENSG00000166851;ENSG00000175063;ENSG00000178999;ENSG00000152253	119 (124)	1.77e-06	0.000695	0		0 (2)	1	1	1.77e-06	0.000695
612	Silver	Ag+ 24h	Down	Mitotic Anaphase	Reactome	12	ENSG00000161888;ENSG00000115163;ENSG00000149503;ENSG00000135476;ENSG00000113368;ENSG00000142945;ENSG00000134690;ENSG00000164611;ENSG00000166851;ENSG00000175063;ENSG00000178999;ENSG00000152253	130 (135)	5.94e-07	0.000366	0		1 (4)	1	1	9.11e-06	0.000904
613	Silver	Ag+ 24h	Down	Ifosfamide Pathway_ Pharmacodynamics	PharmGKB	4	ENSG00000165092;ENSG00000198074;ENSG00000108602;ENSG00000111275	8 (14)	3.46e-06	0.00115	0		0 (0)	1	1	3.46e-06	0.00115
614	Silver	Ag+ 24h	Down	Amino sugar and nucleotide sugar metabolism - Homo sapiens (human)	KEGG	0		43 (48)	1	1	5	HMDB00660;HMDB00169;HMDB00122;HMDB00143;HMDB03345	11 (108)	2.35e-06	0.00234	3.28e-05	0.00287
615	Silver	Ag+ 24h	Down	Resolution of Sister Chromatid Cohesion	Reactome	10	ENSG00000161888;ENSG00000115163;ENSG00000149503;ENSG00000134690;ENSG00000142945;ENSG00000157456;ENSG00000166851;ENSG00000134057;ENSG00000178999;ENSG00000152253	100 (104)	2.61e-06	0.000938	0		1 (6)	1	1	3.61e-05	0.00287
616	Silver	Ag+ 24h	Down	Kinesins	Reactome	6	ENSG00000112984;ENSG00000161800;ENSG00000137807;ENSG00000237649;ENSG00000079616;ENSG00000142945	35 (43)	1.27e-05	0.00366	0		0 (0)	1	1	1.27e-05	0.00366
617	Silver	Ag+ 24h	Down	The role of GTSE1 in G2/M progression after G2 checkpoint	Reactome	4	ENSG00000075218;ENSG00000134057;ENSG00000166851;ENSG00000157456	11 (11)	1.57e-05	0.004	0		0 (2)	1	1	1.57e-05	0.004
618	Silver	Ag+ 24h	Down	Cyclophosphamide Pathway_ Pharmacodynamics	PharmGKB	4	ENSG00000198074;ENSG00000165092;ENSG00000108602;ENSG00000111275	11 (17)	1.57e-05	0.004	0		0 (0)	1	1	1.57e-05	0.004
619	Silver	Ag+ 24h	Down	Mitotic Prometaphase	Reactome	10	ENSG00000161888;ENSG00000115163;ENSG00000149503;ENSG00000134690;ENSG00000142945;ENSG00000157456;ENSG00000166851;ENSG00000134057;ENSG00000178999;ENSG00000152253	109 (113)	5.72e-06	0.00176	0		1 (6)	1	1	7.48e-05	0.0054
620	Silver	Ag+ 24h	Down	Phosphorylation of Emi1	Reactome	3	ENSG00000134057;ENSG00000166851;ENSG00000112029	6 (6)	6.73e-05	0.0153	0		0 (2)	1	1	6.73e-05	0.0153
621	Silver	Ag+ 24h	Down	Activation of APC/C and APC/C:Cdc20 mediated degradation of mitotic proteins	Reactome	5	ENSG00000164611;ENSG00000134057;ENSG00000145386;ENSG00000166851;ENSG00000175063	30 (32)	8.04e-05	0.0174	0		0 (0)	1	1	8.04e-05	0.0174
622	Silver	Ag+ 24h	Down	Activation of NIMA Kinases NEK9_ NEK6_ NEK7	Reactome	3	ENSG00000134057;ENSG00000166851;ENSG00000157456	7 (7)	0.000116	0.0228	0		0 (2)	1	1	0.000116	0.0228
623	Silver	Ag+ 24h	Down	Mitotic G2-G2-M phases	Wikipathways	3	ENSG00000134057;ENSG00000157456;ENSG00000166851	5 (5)	3.4e-05	0.00816	0		1 (5)	1	1	0.000384	0.024
624	Silver	Ag+ 24h	Down	Galactose metabolism	EHMN	0		33 (44)	1	1	4	HMDB00169;HMDB00122;HMDB00516;HMDB03345	9 (48)	3.5e-05	0.0279	0.000394	0.024
625	Silver	Ag+ 24h	Down	Regulation of APC/C activators between G1/S and early anaphase	Reactome	5	ENSG00000134057;ENSG00000175063;ENSG00000145386;ENSG00000166851;ENSG00000112029	34 (36)	0.00015	0.0281	0		0 (2)	1	1	0.00015	0.0281
626	Silver	Ag+ 24h	Down	Staphylococcus aureus infection - Homo sapiens (human)	KEGG	4	ENSG00000171557;ENSG00000159403;ENSG00000243649;ENSG00000125730	19 (56)	0.000168	0.0303	0		0 (12)	1	1	0.000168	0.0303
627	Silver	Ag+ 24h	Down	Mitotic Metaphase/Anaphase Transition	Reactome	2	ENSG00000166851;ENSG00000112029	2 (2)	0.000231	0.0345	0		0 (0)	1	1	0.000231	0.0345
628	Silver	Ag+ 24h	Down	sucrose degradation	HumanCyc	0		6 (8)	1	1	3	HMDB00660;HMDB03345;HMDB00516	4 (12)	5.74e-05	0.0382	0.000618	0.0351
629	Silver	Ag+ 24h	Down	Cell cycle - Homo sapiens (human)	KEGG	8	ENSG00000105173;ENSG00000166851;ENSG00000135476;ENSG00000123080;ENSG00000157456;ENSG00000164611;ENSG00000145386;ENSG00000134057	113 (124)	0.000317	0.0427	0		0 (0)	1	1	0.000317	0.0427
630	Silver	Ag+ 24h	Down	Human Complement System	Wikipathways	5	ENSG00000171557;ENSG00000171560;ENSG00000148926;ENSG00000125730;ENSG00000243649	41 (92)	0.00037	0.047	0		0 (5)	1	1	0.00037	0.047
631	Zinc	ZnO NP-NM110 01h	Up	none statistically significant at q<0.05
632	Zinc	ZnO NP-NM110 01h	Down	none statistically significant at q<0.06
633	Zinc	ZnO NP-NM110 06h	Up	EGFR1	NetPath	146	ENSG00000165895;ENSG00000136997;ENSG00000128512;ENSG00000132471;ENSG00000124151;ENSG00000068697;ENSG00000100345;ENSG00000119326;ENSG00000205420;ENSG00000261150;ENSG00000172216;ENSG00000100284;ENSG00000167601;ENSG00000172757;ENSG00000189334;ENSG00000124614;ENSG00000153071;ENSG00000166225;ENSG00000133104;ENSG00000152492;ENSG00000145901;ENSG00000136158;ENSG00000130402;ENSG00000198053;ENSG00000072110…	438 (458)	2.69e-12	1.16e-08	0		0 (4)	1	1	2.69e-12	1.16e-08
634	Zinc	ZnO NP-NM110 06h	Up	Immune System	Reactome	364	ENSG00000049860;ENSG00000124882;ENSG00000184887;ENSG00000097007;ENSG00000104774;ENSG00000198369;ENSG00000105053;ENSG00000075413;ENSG00000077150;ENSG00000144589;ENSG00000164406;ENSG00000068305;ENSG00000121281;ENSG00000008517;ENSG00000118496;ENSG00000089234;ENSG00000006327;ENSG00000137877;ENSG00000120899;ENSG00000163191;ENSG00000124508;ENSG00000155034;ENSG00000126070;ENSG00000079337;ENSG00000204516…	1396 (1950)	9.59e-11	2.07e-07	1	HMDB04956	12 (149)	0.779	1	1.82e-09	3.17e-06
635	Zinc	ZnO NP-NM110 06h	Up	Attenuation phase	Reactome	18	ENSG00000105993;ENSG00000112110;ENSG00000004478;ENSG00000110958;ENSG00000204389;ENSG00000204388;ENSG00000204390;ENSG00000146072;ENSG00000149257;ENSG00000160570;ENSG00000173110;ENSG00000109971;ENSG00000120694;ENSG00000170315;ENSG00000106211;ENSG00000132002;ENSG00000080824;ENSG00000096384	24 (29)	6.84e-09	9.84e-06	0		0 (2)	1	1	6.84e-09	9.84e-06
636	Zinc	ZnO NP-NM110 06h	Up	VEGFA-VEGFR2 Signaling Pathway	Wikipathways	78	ENSG00000118689;ENSG00000119508;ENSG00000153234;ENSG00000168477;ENSG00000196396;ENSG00000152661;ENSG00000177606;ENSG00000065559;ENSG00000169429;ENSG00000100345;ENSG00000112658;ENSG00000173269;ENSG00000119630;ENSG00000104419;ENSG00000108840;ENSG00000155366;ENSG00000076555;ENSG00000178607;ENSG00000131398;ENSG00000092820;ENSG00000120738;ENSG00000179388;ENSG00000050820;ENSG00000162889;ENSG00000113070…	220 (236)	1.95e-08	2.1e-05	0		0 (0)	1	1	1.95e-08	2.1e-05
637	Zinc	ZnO NP-NM110 06h	Up	Tacrolimus/Cyclosporine Pathway_ Pharmacodynamics	PharmGKB	24	ENSG00000105329;ENSG00000197063;ENSG00000177606;ENSG00000171223;ENSG00000130522;ENSG00000065559;ENSG00000221823;ENSG00000198517;ENSG00000170345;ENSG00000125740;ENSG00000075426;ENSG00000109320;ENSG00000077150;ENSG00000182759;ENSG00000173327;ENSG00000140044;ENSG00000173039;ENSG00000104856;ENSG00000185022;ENSG00000107643;ENSG00000034152;ENSG00000196262;ENSG00000162772;ENSG00000175592	41 (44)	4.27e-08	3.07e-05	0		0 (2)	1	1	4.27e-08	3.07e-05
638	Zinc	ZnO NP-NM110 06h	Up	Glucocorticoid Receptor Pathway	Wikipathways	32	ENSG00000179833;ENSG00000095752;ENSG00000099860;ENSG00000177606;ENSG00000140545;ENSG00000165997;ENSG00000170542;ENSG00000176597;ENSG00000139132;ENSG00000198729;ENSG00000155850;ENSG00000122862;ENSG00000077150;ENSG00000167772;ENSG00000113742;ENSG00000117479;ENSG00000187957;ENSG00000067798;ENSG00000136802;ENSG00000110330;ENSG00000023445;ENSG00000148677;ENSG00000170776;ENSG00000135378;ENSG00000118503…	66 (71)	1.13e-07	6.22e-05	0		0 (1)	1	1	1.13e-07	6.22e-05
639	Zinc	ZnO NP-NM110 06h	Up	HSF1-dependent transactivation	Reactome	20	ENSG00000105993;ENSG00000112110;ENSG00000004478;ENSG00000110958;ENSG00000204389;ENSG00000204388;ENSG00000204390;ENSG00000146072;ENSG00000149257;ENSG00000160570;ENSG00000173110;ENSG00000204673;ENSG00000109971;ENSG00000120694;ENSG00000170315;ENSG00000106211;ENSG00000132002;ENSG00000080824;ENSG00000070808;ENSG00000096384	32 (37)	1.27e-07	6.22e-05	0		0 (4)	1	1	1.27e-07	6.22e-05
640	Zinc	ZnO NP-NM110 06h	Up	HSF1 activation	Reactome	18	ENSG00000105993;ENSG00000112110;ENSG00000204389;ENSG00000110958;ENSG00000204390;ENSG00000146072;ENSG00000149257;ENSG00000160570;ENSG00000173110;ENSG00000004478;ENSG00000120694;ENSG00000170315;ENSG00000106211;ENSG00000132002;ENSG00000080824;ENSG00000156508;ENSG00000204388;ENSG00000096384	27 (31)	1.3e-07	6.22e-05	0		0 (0)	1	1	1.3e-07	6.22e-05
641	Zinc	ZnO NP-NM110 06h	Up	Innate Immune System	Reactome	248	ENSG00000124762;ENSG00000083799;ENSG00000170315;ENSG00000135932;ENSG00000185627;ENSG00000049860;ENSG00000185883;ENSG00000131100;ENSG00000127191;ENSG00000131323;ENSG00000117410;ENSG00000033627;ENSG00000097007;ENSG00000121060;ENSG00000197746;ENSG00000104774;ENSG00000198369;ENSG00000080815;ENSG00000147535;ENSG00000254999;ENSG00000075413;ENSG00000162889;ENSG00000172757;ENSG00000141524;ENSG00000127666…	934 (1309)	3.24e-08	2.8e-05	0		9 (116)	1	1	5.91e-07	0.000515
642	Zinc	ZnO NP-NM110 06h	Up	Apoptosis Modulation and Signaling	Wikipathways	35	ENSG00000003402;ENSG00000177606;ENSG00000215788;ENSG00000042286;ENSG00000175104;ENSG00000176171;ENSG00000176720;ENSG00000078902;ENSG00000170345;ENSG00000143384;ENSG00000109320;ENSG00000100906;ENSG00000104081;ENSG00000006062;ENSG00000132906;ENSG00000030110;ENSG00000196954;ENSG00000165806;ENSG00000110330;ENSG00000023445;ENSG00000101966;ENSG00000184304;ENSG00000140379;ENSG00000171552;ENSG00000129473…	86 (92)	5.16e-06	0.00131	0		0 (1)	1	1	5.16e-06	0.00131
643	Zinc	ZnO NP-NM110 06h	Up	Apoptosis Modulation and Signaling	Wikipathways	35	ENSG00000003402;ENSG00000177606;ENSG00000215788;ENSG00000042286;ENSG00000175104;ENSG00000176171;ENSG00000176720;ENSG00000078902;ENSG00000170345;ENSG00000143384;ENSG00000109320;ENSG00000100906;ENSG00000104081;ENSG00000006062;ENSG00000132906;ENSG00000030110;ENSG00000196954;ENSG00000165806;ENSG00000110330;ENSG00000023445;ENSG00000101966;ENSG00000184304;ENSG00000140379;ENSG00000171552;ENSG00000129473…	86 (92)	5.16e-06	0.00131	0		0 (1)	1	1	5.16e-06	0.00131
644	Zinc	ZnO NP-NM110 06h	Up	Apoptosis Modulation and Signaling	Wikipathways	35	ENSG00000003402;ENSG00000177606;ENSG00000215788;ENSG00000042286;ENSG00000175104;ENSG00000176171;ENSG00000176720;ENSG00000078902;ENSG00000170345;ENSG00000143384;ENSG00000109320;ENSG00000100906;ENSG00000104081;ENSG00000006062;ENSG00000132906;ENSG00000030110;ENSG00000196954;ENSG00000165806;ENSG00000110330;ENSG00000023445;ENSG00000101966;ENSG00000184304;ENSG00000140379;ENSG00000171552;ENSG00000129473…	86 (92)	5.16e-06	0.00131	0		0 (1)	1	1	5.16e-06	0.00131
645	Zinc	ZnO NP-NM110 06h	Up	Cellular response to heat stress	Wikipathways	11	ENSG00000105993;ENSG00000170315;ENSG00000149257;ENSG00000132002;ENSG00000146072;ENSG00000160570;ENSG00000173110;ENSG00000004478;ENSG00000112110;ENSG00000106211;ENSG00000120694	12 (16)	1.59e-07	6.85e-05	0		2 (9)	1	1	2.64e-06	0.00153
646	Zinc	ZnO NP-NM110 06h	Up	Mineral absorption - Homo sapiens (human)	KEGG	13	ENSG00000170385;ENSG00000066230;ENSG00000092439;ENSG00000137731;ENSG00000205362;ENSG00000169688;ENSG00000198417;ENSG00000125144;ENSG00000205358;ENSG00000187193;ENSG00000125148;ENSG00000100292;ENSG00000167996	41 (52)	0.045	0.458	9	HMDB00187;HMDB00162;HMDB00696;HMDB00167;HMDB00168;HMDB00172;HMDB00159;HMDB00929;HMDB13773;HMDB00687	15 (29)	6.07e-06	0.00513	4.4e-06	0.00192
647	Zinc	ZnO NP-NM110 06h	Up	TGF-beta Signaling Pathway	Wikipathways	46	ENSG00000105329;ENSG00000140682;ENSG00000124762;ENSG00000136997;ENSG00000163877;ENSG00000177606;ENSG00000172059;ENSG00000130522;ENSG00000065559;ENSG00000175104;ENSG00000157077;ENSG00000049759;ENSG00000103275;ENSG00000067082;ENSG00000152256;ENSG00000170345;ENSG00000125740;ENSG00000105976;ENSG00000185359;ENSG00000155090;ENSG00000134954;ENSG00000198742;ENSG00000103126;ENSG00000205250;ENSG00000162772…	128 (132)	1.04e-05	0.00217	0		0 (0)	1	1	1.04e-05	0.00217
648	Zinc	ZnO NP-NM110 06h	Up	Metallothioneins bind metals	Reactome	7	ENSG00000205362;ENSG00000169688;ENSG00000198417;ENSG00000125144;ENSG00000205358;ENSG00000187193;ENSG00000125148	7 (12)	1.11e-05	0.00217	0		0 (4)	1	1	1.11e-05	0.00217
649	Zinc	ZnO NP-NM110 06h	Up	Response to metal ions	Reactome	7	ENSG00000205362;ENSG00000169688;ENSG00000198417;ENSG00000125144;ENSG00000205358;ENSG00000187193;ENSG00000125148	7 (12)	1.11e-05	0.00217	0		0 (4)	1	1	1.11e-05	0.00217
650	Zinc	ZnO NP-NM110 06h	Up	Legionellosis - Homo sapiens (human)	KEGG	24	ENSG00000144381;ENSG00000168811;ENSG00000254772;ENSG00000150782;ENSG00000176171;ENSG00000013441;ENSG00000109320;ENSG00000077150;ENSG00000100906;ENSG00000136869;ENSG00000165806;ENSG00000132906;ENSG00000173039;ENSG00000169896;ENSG00000204389;ENSG00000204388;ENSG00000163734;ENSG00000099968;ENSG00000173110;ENSG00000109971;ENSG00000091106;ENSG00000204390;ENSG00000169429;ENSG00000156508	52 (55)	1.27e-05	0.00238	0		0 (2)	1	1	1.27e-05	0.00238
651	Zinc	ZnO NP-NM110 06h	Up	RANKL-RANK (Receptor activator of NFKB (ligand)) Signaling Pathway	Wikipathways	23	ENSG00000177606;ENSG00000056558;ENSG00000127191;ENSG00000131323;ENSG00000175104;ENSG00000161011;ENSG00000170345;ENSG00000109320;ENSG00000090339;ENSG00000100906;ENSG00000187098;ENSG00000269335;ENSG00000077150;ENSG00000173039;ENSG00000104856;ENSG00000141655;ENSG00000107643;ENSG00000115641;ENSG00000110395;ENSG00000169032;ENSG00000169398;ENSG00000033327;ENSG00000136238	49 (55)	1.36e-05	0.00244	0		0 (2)	1	1	1.36e-05	0.00244
652	Zinc	ZnO NP-NM110 06h	Up	CD40/CD40L signaling	PID	17	ENSG00000136997;ENSG00000127191;ENSG00000171552;ENSG00000110330;ENSG00000023445;ENSG00000100906;ENSG00000177606;ENSG00000065559;ENSG00000056558;ENSG00000173039;ENSG00000131323;ENSG00000175104;ENSG00000109320;ENSG00000118503;ENSG00000006062;ENSG00000101017;ENSG00000107643	32 (34)	2.41e-05	0.00372	0		0 (1)	1	1	2.41e-05	0.00372
653	Zinc	ZnO NP-NM110 06h	Up	Class I MHC mediated antigen processing & presentation	Wikipathways	0		0 (0)	1	1	10	HMDB00187;HMDB00162;HMDB00696;HMDB00167;HMDB00168;HMDB00172;HMDB00159;HMDB00929;HMDB00158;HMDB13773;HMDB00687	21 (35)	2.67e-05	0.00513	2.67e-05	0.00513
654	Zinc	ZnO NP-NM110 06h	Up	tRNA Aminoacylation	Wikipathways	0		0 (0)	1	1	10	HMDB00187;HMDB00162;HMDB00696;HMDB00167;HMDB00168;HMDB00172;HMDB00159;HMDB00929;HMDB00158;HMDB13773;HMDB00687	21 (26)	2.67e-05	0.00513	2.67e-05	0.00513
655	Zinc	ZnO NP-NM110 06h	Up	Amino Acid interconversion	Wikipathways	0		0 (0)	1	1	13	HMDB00214;HMDB00187;HMDB00162;HMDB00696;HMDB00719;HMDB00167;HMDB00168;HMDB00172;HMDB00159;HMDB00929;HMDB00001;HMDB00479;HMDB00158;HMDB13773;HMDB00687	35 (51)	3.69e-05	0.00513	3.69e-05	0.00513
656	Zinc	ZnO NP-NM110 06h	Up	Roxithromycin Action Pathway	SMPDB	0		0 (0)	1	1	7	HMDB00162;HMDB00696;HMDB00167;HMDB00168;HMDB03406;HMDB00172;HMDB13773;HMDB00687	11 (20)	4.63e-05	0.00513	4.63e-05	0.00513
657	Zinc	ZnO NP-NM110 06h	Up	Josamycin Action Pathway	SMPDB	0		0 (0)	1	1	7	HMDB00162;HMDB00696;HMDB00167;HMDB00168;HMDB03406;HMDB00172;HMDB13773;HMDB00687	11 (20)	4.63e-05	0.00513	4.63e-05	0.00513
658	Zinc	ZnO NP-NM110 06h	Up	Tigecycline Action Pathway	SMPDB	0		0 (0)	1	1	7	HMDB00162;HMDB00696;HMDB00167;HMDB00168;HMDB03406;HMDB00172;HMDB13773;HMDB00687	11 (20)	4.63e-05	0.00513	4.63e-05	0.00513
659	Zinc	ZnO NP-NM110 06h	Up	Arbekacin Action Pathway	SMPDB	0		0 (0)	1	1	7	HMDB00162;HMDB00696;HMDB00167;HMDB00168;HMDB03406;HMDB00172;HMDB13773;HMDB00687	11 (20)	4.63e-05	0.00513	4.63e-05	0.00513
660	Zinc	ZnO NP-NM110 06h	Up	Paromomycin Action Pathway	SMPDB	0		0 (0)	1	1	7	HMDB00162;HMDB00696;HMDB00167;HMDB00168;HMDB03406;HMDB00172;HMDB13773;HMDB00687	11 (20)	4.63e-05	0.00513	4.63e-05	0.00513
661	Zinc	ZnO NP-NM110 06h	Up	Oxytetracycline Action Pathway	SMPDB	0		0 (0)	1	1	7	HMDB00162;HMDB00696;HMDB00167;HMDB00168;HMDB03406;HMDB00172;HMDB13773;HMDB00687	11 (20)	4.63e-05	0.00513	4.63e-05	0.00513
662	Zinc	ZnO NP-NM110 06h	Up	Clomocycline Action Pathway	SMPDB	0		0 (0)	1	1	7	HMDB00162;HMDB00696;HMDB00167;HMDB00168;HMDB03406;HMDB00172;HMDB13773;HMDB00687	11 (20)	4.63e-05	0.00513	4.63e-05	0.00513
663	Zinc	ZnO NP-NM110 06h	Up	Lincomycin Action Pathway	SMPDB	0		0 (0)	1	1	7	HMDB00162;HMDB00696;HMDB00167;HMDB00168;HMDB03406;HMDB00172;HMDB13773;HMDB00687	11 (20)	4.63e-05	0.00513	4.63e-05	0.00513
664	Zinc	ZnO NP-NM110 06h	Up	Demeclocycline Action Pathway	SMPDB	0		0 (0)	1	1	7	HMDB00162;HMDB00696;HMDB00167;HMDB00168;HMDB03406;HMDB00172;HMDB13773;HMDB00687	11 (20)	4.63e-05	0.00513	4.63e-05	0.00513
665	Zinc	ZnO NP-NM110 06h	Up	Methacycline Action Pathway	SMPDB	0		0 (0)	1	1	7	HMDB00162;HMDB00696;HMDB00167;HMDB00168;HMDB03406;HMDB00172;HMDB13773;HMDB00687	11 (20)	4.63e-05	0.00513	4.63e-05	0.00513
666	Zinc	ZnO NP-NM110 06h	Up	Rolitetracycline Action Pathway	SMPDB	0		0 (0)	1	1	7	HMDB00162;HMDB00696;HMDB00167;HMDB00168;HMDB03406;HMDB00172;HMDB13773;HMDB00687	11 (20)	4.63e-05	0.00513	4.63e-05	0.00513
667	Zinc	ZnO NP-NM110 06h	Up	Streptomycin Action Pathway	SMPDB	0		0 (0)	1	1	7	HMDB00162;HMDB00696;HMDB00167;HMDB00168;HMDB03406;HMDB00172;HMDB13773;HMDB00687	11 (20)	4.63e-05	0.00513	4.63e-05	0.00513
668	Zinc	ZnO NP-NM110 06h	Up	Spectinomycin Action Pathway	SMPDB	0		0 (0)	1	1	7	HMDB00162;HMDB00696;HMDB00167;HMDB00168;HMDB03406;HMDB00172;HMDB13773;HMDB00687	11 (20)	4.63e-05	0.00513	4.63e-05	0.00513
669	Zinc	ZnO NP-NM110 06h	Up	Kanamycin Action Pathway	SMPDB	0		0 (0)	1	1	7	HMDB00162;HMDB00696;HMDB00167;HMDB00168;HMDB03406;HMDB00172;HMDB13773;HMDB00687	11 (20)	4.63e-05	0.00513	4.63e-05	0.00513
670	Zinc	ZnO NP-NM110 06h	Up	Gentamicin Action Pathway	SMPDB	0		0 (0)	1	1	7	HMDB00162;HMDB00696;HMDB00167;HMDB00168;HMDB03406;HMDB00172;HMDB13773;HMDB00687	11 (20)	4.63e-05	0.00513	4.63e-05	0.00513
671	Zinc	ZnO NP-NM110 06h	Up	Netilmicin Action Pathway	SMPDB	0		0 (0)	1	1	7	HMDB00162;HMDB00696;HMDB00167;HMDB00168;HMDB03406;HMDB00172;HMDB13773;HMDB00687	11 (20)	4.63e-05	0.00513	4.63e-05	0.00513
672	Zinc	ZnO NP-NM110 06h	Up	Neomycin Action Pathway	SMPDB	0		0 (0)	1	1	7	HMDB00162;HMDB00696;HMDB00167;HMDB00168;HMDB03406;HMDB00172;HMDB13773;HMDB00687	11 (20)	4.63e-05	0.00513	4.63e-05	0.00513
673	Zinc	ZnO NP-NM110 06h	Up	Erythromycin Action Pathway	SMPDB	0		0 (0)	1	1	7	HMDB00162;HMDB00696;HMDB00167;HMDB00168;HMDB03406;HMDB00172;HMDB13773;HMDB00687	11 (20)	4.63e-05	0.00513	4.63e-05	0.00513
674	Zinc	ZnO NP-NM110 06h	Up	Amikacin Action Pathway	SMPDB	0		0 (0)	1	1	7	HMDB00162;HMDB00696;HMDB00167;HMDB00168;HMDB03406;HMDB00172;HMDB13773;HMDB00687	11 (20)	4.63e-05	0.00513	4.63e-05	0.00513
675	Zinc	ZnO NP-NM110 06h	Up	Telithromycin Action Pathway	SMPDB	0		0 (0)	1	1	7	HMDB00162;HMDB00696;HMDB00167;HMDB00168;HMDB03406;HMDB00172;HMDB13773;HMDB00687	11 (20)	4.63e-05	0.00513	4.63e-05	0.00513
676	Zinc	ZnO NP-NM110 06h	Up	Lymecycline Action Pathway	SMPDB	0		0 (0)	1	1	7	HMDB00162;HMDB00696;HMDB00167;HMDB00168;HMDB03406;HMDB00172;HMDB13773;HMDB00687	11 (20)	4.63e-05	0.00513	4.63e-05	0.00513
677	Zinc	ZnO NP-NM110 06h	Up	Chloramphenicol Action Pathway	SMPDB	0		0 (0)	1	1	7	HMDB00162;HMDB00696;HMDB00167;HMDB00168;HMDB03406;HMDB00172;HMDB13773;HMDB00687	11 (20)	4.63e-05	0.00513	4.63e-05	0.00513
678	Zinc	ZnO NP-NM110 06h	Up	Troleandomycin Action Pathway	SMPDB	0		0 (0)	1	1	7	HMDB00162;HMDB00696;HMDB00167;HMDB00168;HMDB03406;HMDB00172;HMDB13773;HMDB00687	11 (20)	4.63e-05	0.00513	4.63e-05	0.00513
679	Zinc	ZnO NP-NM110 06h	Up	Azithromycin Action Pathway	SMPDB	0		0 (0)	1	1	7	HMDB00162;HMDB00696;HMDB00167;HMDB00168;HMDB03406;HMDB00172;HMDB13773;HMDB00687	11 (20)	4.63e-05	0.00513	4.63e-05	0.00513
680	Zinc	ZnO NP-NM110 06h	Up	Clindamycin Action Pathway	SMPDB	0		0 (0)	1	1	7	HMDB00162;HMDB00696;HMDB00167;HMDB00168;HMDB03406;HMDB00172;HMDB13773;HMDB00687	11 (20)	4.63e-05	0.00513	4.63e-05	0.00513
681	Zinc	ZnO NP-NM110 06h	Up	Clarithromycin Action Pathway	SMPDB	0		0 (0)	1	1	7	HMDB00162;HMDB00696;HMDB00167;HMDB00168;HMDB03406;HMDB00172;HMDB13773;HMDB00687	11 (20)	4.63e-05	0.00513	4.63e-05	0.00513
682	Zinc	ZnO NP-NM110 06h	Up	Tobramycin Action Pathway	SMPDB	0		0 (0)	1	1	7	HMDB00162;HMDB00696;HMDB00167;HMDB00168;HMDB03406;HMDB00172;HMDB13773;HMDB00687	11 (20)	4.63e-05	0.00513	4.63e-05	0.00513
683	Zinc	ZnO NP-NM110 06h	Up	Minocycline Action Pathway	SMPDB	0		0 (0)	1	1	7	HMDB00162;HMDB00696;HMDB00167;HMDB00168;HMDB03406;HMDB00172;HMDB13773;HMDB00687	11 (20)	4.63e-05	0.00513	4.63e-05	0.00513
684	Zinc	ZnO NP-NM110 06h	Up	Rheumatoid arthritis - Homo sapiens (human)	KEGG	25	ENSG00000105329;ENSG00000095752;ENSG00000150782;ENSG00000177606;ENSG00000185883;ENSG00000131100;ENSG00000117410;ENSG00000047249;ENSG00000033627;ENSG00000113732;ENSG00000170345;ENSG00000100554;ENSG00000090339;ENSG00000136869;ENSG00000136888;ENSG00000116039;ENSG00000128524;ENSG00000196611;ENSG00000141655;ENSG00000115009;ENSG00000163735;ENSG00000135047;ENSG00000169429;ENSG00000185344;ENSG00000112715	58 (90)	3.59e-05	0.00517	0		0 (4)	1	1	3.59e-05	0.00517
685	Zinc	ZnO NP-NM110 06h	Up	MAPK Signaling Pathway	Wikipathways	51	ENSG00000105329;ENSG00000136997;ENSG00000177606;ENSG00000130522;ENSG00000065559;ENSG00000127191;ENSG00000175104;ENSG00000213281;ENSG00000221823;ENSG00000113319;ENSG00000170345;ENSG00000153233;ENSG00000162889;ENSG00000069956;ENSG00000173327;ENSG00000120129;ENSG00000125952;ENSG00000109320;ENSG00000138166;ENSG00000139318;ENSG00000164086;ENSG00000006062;ENSG00000112658;ENSG00000269335;ENSG00000165806…	153 (168)	3.84e-05	0.00525	0		0 (1)	1	1	3.84e-05	0.00525
686	Zinc	ZnO NP-NM110 06h	Up	Apoptosis	Wikipathways	31	ENSG00000136997;ENSG00000003402;ENSG00000177606;ENSG00000215788;ENSG00000065559;ENSG00000056558;ENSG00000127191;ENSG00000131323;ENSG00000104765;ENSG00000176720;ENSG00000196954;ENSG00000143384;ENSG00000109320;ENSG00000100906;ENSG00000104825;ENSG00000146232;ENSG00000132906;ENSG00000030110;ENSG00000269335;ENSG00000165806;ENSG00000110330;ENSG00000023445;ENSG00000101966;ENSG00000226979;ENSG00000173039…	79 (85)	4.13e-05	0.00525	0		0 (0)	1	1	4.13e-05	0.00525
687	Zinc	ZnO NP-NM110 06h	Up	Apoptotic Signaling Pathway	Wikipathways	31	ENSG00000136997;ENSG00000003402;ENSG00000177606;ENSG00000215788;ENSG00000065559;ENSG00000056558;ENSG00000127191;ENSG00000131323;ENSG00000104765;ENSG00000176720;ENSG00000196954;ENSG00000143384;ENSG00000109320;ENSG00000100906;ENSG00000104825;ENSG00000146232;ENSG00000132906;ENSG00000030110;ENSG00000269335;ENSG00000165806;ENSG00000110330;ENSG00000023445;ENSG00000101966;ENSG00000226979;ENSG00000173039…	79 (85)	4.13e-05	0.00525	0		0 (0)	1	1	4.13e-05	0.00525
688	Zinc	ZnO NP-NM110 06h	Up	Corticotropin-releasing hormone signaling pathway	Wikipathways	30	ENSG00000105329;ENSG00000130726;ENSG00000143178;ENSG00000152661;ENSG00000171223;ENSG00000130522;ENSG00000173801;ENSG00000186847;ENSG00000150782;ENSG00000178607;ENSG00000079337;ENSG00000070808;ENSG00000170345;ENSG00000125740;ENSG00000075426;ENSG00000109320;ENSG00000100906;ENSG00000136869;ENSG00000153234;ENSG00000132906;ENSG00000080824;ENSG00000173039;ENSG00000123358;ENSG00000107643;ENSG00000169032…	76 (92)	4.79e-05	0.00592	0		0 (0)	1	1	4.79e-05	0.00592
689	Zinc	ZnO NP-NM110 06h	Up	EBV LMP1 signaling	Wikipathways	13	ENSG00000269335;ENSG00000056558;ENSG00000006062;ENSG00000100906;ENSG00000196923;ENSG00000169429;ENSG00000173039;ENSG00000175104;ENSG00000109320;ENSG00000077150;ENSG00000080824;ENSG00000115009;ENSG00000107643	22 (23)	5.1e-05	0.00608	0		0 (0)	1	1	5.1e-05	0.00608
690	Zinc	ZnO NP-NM110 06h	Up	tnfr2 signaling pathway	BioCarta	9	ENSG00000226979;ENSG00000127191;ENSG00000056558;ENSG00000173039;ENSG00000131323;ENSG00000118503;ENSG00000100906;ENSG00000136560;ENSG00000006062	12 (13)	5.21e-05	0.00608	0		0 (1)	1	1	5.21e-05	0.00608
691	Zinc	ZnO NP-NM110 06h	Up	Osteoclast differentiation - Homo sapiens (human)	KEGG	37	ENSG00000105329;ENSG00000083799;ENSG00000177606;ENSG00000171223;ENSG00000130522;ENSG00000127191;ENSG00000175104;ENSG00000159128;ENSG00000221823;ENSG00000171608;ENSG00000161011;ENSG00000170345;ENSG00000125740;ENSG00000075426;ENSG00000109320;ENSG00000077150;ENSG00000100906;ENSG00000006062;ENSG00000184557;ENSG00000187098;ENSG00000269335;ENSG00000173039;ENSG00000104856;ENSG00000198053;ENSG00000141655…	102 (132)	5.92e-05	0.00673	0		0 (3)	1	1	5.92e-05	0.00673
692	Zinc	ZnO NP-NM110 06h	Up	miR-targeted genes in muscle cell - TarBase	Wikipathways	91	ENSG00000124762;ENSG00000124151;ENSG00000096070;ENSG00000117143;ENSG00000033627;ENSG00000172216;ENSG00000068024;ENSG00000164938;ENSG00000196923;ENSG00000167601;ENSG00000113615;ENSG00000091831;ENSG00000152601;ENSG00000156273;ENSG00000142186;ENSG00000092531;ENSG00000114383;ENSG00000067955;ENSG00000143384;ENSG00000110218;ENSG00000137309;ENSG00000164171;ENSG00000100292;ENSG00000120889;ENSG00000120742…	319 (398)	6.13e-05	0.00679	0		0 (0)	1	1	6.13e-05	0.00679
693	Zinc	ZnO NP-NM110 06h	Up	cd40l signaling pathway	BioCarta	7	ENSG00000071054;ENSG00000118503;ENSG00000173039;ENSG00000131323;ENSG00000175104;ENSG00000100906;ENSG00000101017	8 (9)	7.33e-05	0.00791	0		0 (0)	1	1	7.33e-05	0.00791
694	Zinc	ZnO NP-NM110 06h	Up	TNF signaling pathway - Homo sapiens (human)	KEGG	37	ENSG00000150630;ENSG00000003402;ENSG00000128342;ENSG00000168404;ENSG00000177606;ENSG00000171223;ENSG00000065559;ENSG00000056558;ENSG00000127191;ENSG00000131323;ENSG00000172216;ENSG00000171608;ENSG00000170345;ENSG00000109320;ENSG00000090339;ENSG00000100906;ENSG00000006062;ENSG00000184557;ENSG00000269335;ENSG00000165806;ENSG00000110330;ENSG00000023445;ENSG00000226979;ENSG00000173039;ENSG00000156711…	103 (110)	7.52e-05	0.00792	0		0 (0)	1	1	7.52e-05	0.00792
695	Zinc	ZnO NP-NM110 06h	Up	Toll Like Receptor 3 (TLR3) Cascade	Reactome	38	ENSG00000104695;ENSG00000177606;ENSG00000221983;ENSG00000065559;ENSG00000170315;ENSG00000131323;ENSG00000150991;ENSG00000175104;ENSG00000072401;ENSG00000136560;ENSG00000109332;ENSG00000269335;ENSG00000177889;ENSG00000162889;ENSG00000170345;ENSG00000168884;ENSG00000127666;ENSG00000077150;ENSG00000100906;ENSG00000104825;ENSG00000136869;ENSG00000109320;ENSG00000134070;ENSG00000110330;ENSG00000023445…	94 (101)	2.5e-06	0.000828	0		1 (11)	1	1	3.48e-05	0.00808
696	Zinc	ZnO NP-NM110 06h	Up	TRIF-mediated TLR3/TLR4 signaling	Reactome	38	ENSG00000104695;ENSG00000177606;ENSG00000221983;ENSG00000065559;ENSG00000170315;ENSG00000131323;ENSG00000150991;ENSG00000175104;ENSG00000072401;ENSG00000136560;ENSG00000109332;ENSG00000269335;ENSG00000177889;ENSG00000162889;ENSG00000170345;ENSG00000168884;ENSG00000127666;ENSG00000077150;ENSG00000100906;ENSG00000104825;ENSG00000136869;ENSG00000109320;ENSG00000134070;ENSG00000110330;ENSG00000023445…	94 (101)	2.5e-06	0.000828	0		1 (11)	1	1	3.48e-05	0.00808
697	Zinc	ZnO NP-NM110 06h	Up	MyD88-independent TLR3/TLR4 cascade	Reactome	38	ENSG00000104695;ENSG00000177606;ENSG00000221983;ENSG00000065559;ENSG00000170315;ENSG00000131323;ENSG00000150991;ENSG00000175104;ENSG00000072401;ENSG00000136560;ENSG00000109332;ENSG00000269335;ENSG00000177889;ENSG00000162889;ENSG00000170345;ENSG00000168884;ENSG00000127666;ENSG00000077150;ENSG00000100906;ENSG00000104825;ENSG00000136869;ENSG00000109320;ENSG00000134070;ENSG00000110330;ENSG00000023445…	94 (101)	2.5e-06	0.000828	0		1 (11)	1	1	3.48e-05	0.00808
698	Zinc	ZnO NP-NM110 06h	Up	Cytokine Signaling in Immune system	Reactome	109	ENSG00000243646;ENSG00000095752;ENSG00000168811;ENSG00000215788;ENSG00000127191;ENSG00000131323;ENSG00000049249;ENSG00000175104;ENSG00000150782;ENSG00000121060;ENSG00000006016;ENSG00000198369;ENSG00000075413;ENSG00000070182;ENSG00000137218;ENSG00000166225;ENSG00000134070;ENSG00000141655;ENSG00000115607;ENSG00000115604;ENSG00000259207;ENSG00000188766;ENSG00000169398;ENSG00000170581;ENSG00000033327…	371 (487)	2.68e-06	0.000828	0		4 (37)	1	1	3.71e-05	0.00808
699	Zinc	ZnO NP-NM110 06h	Up	Regulation of Apoptosis by Parathyroid Hormone-related Protein	Wikipathways	12	ENSG00000136997;ENSG00000030110;ENSG00000099968;ENSG00000132470;ENSG00000126453;ENSG00000087494;ENSG00000082701;ENSG00000140379;ENSG00000171552;ENSG00000129473;ENSG00000176720;ENSG00000015475	20 (21)	8.15e-05	0.00838	0		0 (0)	1	1	8.15e-05	0.00838
700	Zinc	ZnO NP-NM110 06h	Up	Cell junction organization	Reactome	28	ENSG00000124171;ENSG00000072110;ENSG00000128591;ENSG00000173801;ENSG00000169756;ENSG00000065618;ENSG00000158769;ENSG00000113946;ENSG00000089159;ENSG00000178184;ENSG00000196878;ENSG00000130396;ENSG00000058085;ENSG00000106404;ENSG00000189143;ENSG00000044115;ENSG00000178209;ENSG00000162458;ENSG00000073712;ENSG00000107140;ENSG00000132470;ENSG00000157224;ENSG00000125753;ENSG00000184697;ENSG00000163347…	71 (89)	8.65e-05	0.00853	0		0 (1)	1	1	8.65e-05	0.00853
701	Zinc	ZnO NP-NM110 06h	Up	Photodynamic therapy-induced AP-1 survival signaling.	Wikipathways	20	ENSG00000030110;ENSG00000156711;ENSG00000146648;ENSG00000003402;ENSG00000034152;ENSG00000127191;ENSG00000143384;ENSG00000124762;ENSG00000177606;ENSG00000171223;ENSG00000113070;ENSG00000065559;ENSG00000170345;ENSG00000126767;ENSG00000175104;ENSG00000171552;ENSG00000080824;ENSG00000104081;ENSG00000015475;ENSG00000107643	44 (50)	8.69e-05	0.00853	0		0 (0)	1	1	8.69e-05	0.00853
702	Zinc	ZnO NP-NM110 06h	Up	bone remodeling	BioCarta	10	ENSG00000269335;ENSG00000170345;ENSG00000141655;ENSG00000173039;ENSG00000075426;ENSG00000175104;ENSG00000100906;ENSG00000159110;ENSG00000175592;ENSG00000107643	15 (16)	9.36e-05	0.00879	0		0 (1)	1	1	9.36e-05	0.00879
703	Zinc	ZnO NP-NM110 06h	Up	Cell-extracellular matrix interactions	Reactome	10	ENSG00000073712;ENSG00000089159;ENSG00000107140;ENSG00000128591;ENSG00000125753;ENSG00000169756;ENSG00000072110;ENSG00000162458;ENSG00000197702;ENSG00000072163	15 (16)	9.36e-05	0.00879	0		0 (0)	1	1	9.36e-05	0.00879
704	Zinc	ZnO NP-NM110 06h	Up	Photodynamic therapy-induced NF-kB survival signaling	Wikipathways	15	ENSG00000090339;ENSG00000003402;ENSG00000110330;ENSG00000023445;ENSG00000077150;ENSG00000269858;ENSG00000196611;ENSG00000173039;ENSG00000104856;ENSG00000140379;ENSG00000109320;ENSG00000129473;ENSG00000169429;ENSG00000112715;ENSG00000175104	29 (35)	0.000109	0.01	0		0 (0)	1	1	0.000109	0.01
705	Zinc	ZnO NP-NM110 06h	Up	AP-1 transcription factor network	PID	24	ENSG00000105329;ENSG00000136997;ENSG00000125148;ENSG00000197063;ENSG00000152661;ENSG00000177606;ENSG00000171223;ENSG00000130522;ENSG00000148737;ENSG00000206503;ENSG00000102265;ENSG00000120738;ENSG00000170345;ENSG00000125740;ENSG00000091831;ENSG00000120129;ENSG00000134954;ENSG00000075426;ENSG00000122861;ENSG00000162772;ENSG00000196611;ENSG00000067955;ENSG00000169429;ENSG00000175592	58 (71)	0.000112	0.0101	0		0 (5)	1	1	0.000112	0.0101
706	Zinc	ZnO NP-NM110 06h	Up	Tetracycline Action Pathway	SMPDB	0		0 (0)	1	1	7	HMDB00162;HMDB00696;HMDB00167;HMDB00168;HMDB03406;HMDB00172;HMDB13773;HMDB00687	12 (20)	0.000101	0.0103	0.000101	0.0103
707	Zinc	ZnO NP-NM110 06h	Up	Doxycycline Action Pathway	SMPDB	0		0 (0)	1	1	7	HMDB00162;HMDB00696;HMDB00167;HMDB00168;HMDB03406;HMDB00172;HMDB13773;HMDB00687	12 (20)	0.000101	0.0103	0.000101	0.0103
708	Zinc	ZnO NP-NM110 06h	Up	TNF receptor superfamily (TNFSF) members mediating non-canonical NF-kB pathway	Reactome	9	ENSG00000006327;ENSG00000110330;ENSG00000023445;ENSG00000226979;ENSG00000127191;ENSG00000131323;ENSG00000141655;ENSG00000006062;ENSG00000101017	13 (18)	0.00014	0.0123	0		0 (0)	1	1	0.00014	0.0123
709	Zinc	ZnO NP-NM110 06h	Up	TNF related weak inducer of apoptosis (TWEAK) Signaling Pathway	Wikipathways	18	ENSG00000131323;ENSG00000006327;ENSG00000165806;ENSG00000110330;ENSG00000023445;ENSG00000136238;ENSG00000177606;ENSG00000056558;ENSG00000173039;ENSG00000104856;ENSG00000082701;ENSG00000109320;ENSG00000077150;ENSG00000100906;ENSG00000104825;ENSG00000127191;ENSG00000006062;ENSG00000107643	39 (41)	0.000153	0.0132	0		0 (0)	1	1	0.000153	0.0132
710	Zinc	ZnO NP-NM110 06h	Up	IKK complex recruitment mediated by RIP1	Reactome	13	ENSG00000243414;ENSG00000109332;ENSG00000269335;ENSG00000177889;ENSG00000110330;ENSG00000023445;ENSG00000221983;ENSG00000170315;ENSG00000150991;ENSG00000175104;ENSG00000127666;ENSG00000072401;ENSG00000136869	24 (26)	0.000172	0.0143	0		0 (2)	1	1	0.000172	0.0143
711	Zinc	ZnO NP-NM110 06h	Up	Hepatitis C and Hepatocellular Carcinoma	Wikipathways	20	ENSG00000105329;ENSG00000136997;ENSG00000124762;ENSG00000109320;ENSG00000154277;ENSG00000165806;ENSG00000160293;ENSG00000023445;ENSG00000136238;ENSG00000128567;ENSG00000177606;ENSG00000169429;ENSG00000160712;ENSG00000171552;ENSG00000162998;ENSG00000166949;ENSG00000196611;ENSG00000132906;ENSG00000112715;ENSG00000107643	46 (50)	0.000185	0.0148	0		0 (0)	1	1	0.000185	0.0148
712	Zinc	ZnO NP-NM110 06h	Up	NF-kappa B signaling pathway - Homo sapiens (human)	KEGG	33	ENSG00000003402;ENSG00000099860;ENSG00000118503;ENSG00000056558;ENSG00000127191;ENSG00000131323;ENSG00000175104;ENSG00000121060;ENSG00000269335;ENSG00000103275;ENSG00000150455;ENSG00000204435;ENSG00000109320;ENSG00000090339;ENSG00000100906;ENSG00000136869;ENSG00000006062;ENSG00000101017;ENSG00000101966;ENSG00000127666;ENSG00000110330;ENSG00000023445;ENSG00000077150;ENSG00000122861;ENSG00000226979…	80 (95)	6.76e-06	0.00162	0		1 (3)	1	1	8.73e-05	0.0169
713	Zinc	ZnO NP-NM110 06h	Up	Direct p53 effectors	PID	44	ENSG00000196754;ENSG00000124762;ENSG00000128342;ENSG00000105976;ENSG00000177606;ENSG00000177374;ENSG00000042286;ENSG00000159388;ENSG00000104765;ENSG00000116017;ENSG00000104419;ENSG00000164938;ENSG00000146648;ENSG00000142627;ENSG00000120129;ENSG00000168209;ENSG00000138166;ENSG00000102760;ENSG00000106366;ENSG00000030110;ENSG00000076242;ENSG00000143384;ENSG00000101412;ENSG00000112242;ENSG00000162772…	135 (147)	0.000226	0.0176	0		0 (1)	1	1	0.000226	0.0176
714	Zinc	ZnO NP-NM110 06h	Up	Pathways in cancer - Homo sapiens (human)	KEGG	98	ENSG00000136997;ENSG00000124762;ENSG00000056558;ENSG00000127191;ENSG00000131323;ENSG00000175104;ENSG00000097007;ENSG00000125952;ENSG00000134954;ENSG00000167657;ENSG00000171552;ENSG00000164171;ENSG00000132694;ENSG00000125384;ENSG00000171680;ENSG00000119630;ENSG00000121281;ENSG00000169398;ENSG00000103126;ENSG00000015475;ENSG00000101109;ENSG00000105976;ENSG00000173207;ENSG00000125378;ENSG00000177606…	339 (397)	1.79e-05	0.00298	1	HMDB01830	5 (27)	0.464	1	0.000106	0.0184
715	Zinc	ZnO NP-NM110 06h	Up	Epithelial cell signaling in Helicobacter pylori infection - Homo sapiens (human)	KEGG	27	ENSG00000105976;ENSG00000116039;ENSG00000185883;ENSG00000065559;ENSG00000131100;ENSG00000117410;ENSG00000047249;ENSG00000033627;ENSG00000158769;ENSG00000146648;ENSG00000104067;ENSG00000113070;ENSG00000100554;ENSG00000100906;ENSG00000006062;ENSG00000113732;ENSG00000269335;ENSG00000136888;ENSG00000177606;ENSG00000128524;ENSG00000173039;ENSG00000107643;ENSG00000156711;ENSG00000109320;ENSG00000136238…	61 (68)	9.73e-06	0.00217	0		1 (7)	1	1	0.000122	0.0193
716	Zinc	ZnO NP-NM110 06h	Up	Nuclear Receptors Meta-Pathway	Wikipathways	72	ENSG00000105329;ENSG00000197063;ENSG00000105401;ENSG00000095752;ENSG00000136997;ENSG00000168811;ENSG00000132002;ENSG00000124151;ENSG00000010379;ENSG00000177606;ENSG00000171223;ENSG00000131389;ENSG00000140545;ENSG00000173262;ENSG00000160326;ENSG00000154025;ENSG00000165997;ENSG00000170542;ENSG00000109667;ENSG00000090013;ENSG00000100979;ENSG00000176597;ENSG00000146648;ENSG00000120738;ENSG00000142627…	251 (316)	0.000292	0.0221	0		0 (0)	1	1	0.000292	0.0221
717	Zinc	ZnO NP-NM110 06h	Up	Endocytosis - Homo sapiens (human)	KEGG	68	ENSG00000105329;ENSG00000124171;ENSG00000164695;ENSG00000157985;ENSG00000167987;ENSG00000105976;ENSG00000198742;ENSG00000111540;ENSG00000072818;ENSG00000112335;ENSG00000175104;ENSG00000168461;ENSG00000147010;ENSG00000157077;ENSG00000155256;ENSG00000049759;ENSG00000206503;ENSG00000166949;ENSG00000146648;ENSG00000172803;ENSG00000075785;ENSG00000255112;ENSG00000008256;ENSG00000105443;ENSG00000108669…	236 (260)	0.00037	0.0258	0		0 (6)	1	1	0.00037	0.0258
718	Zinc	ZnO NP-NM110 06h	Up	Transport of inorganic cations-anions and amino acids-oligopeptides	Wikipathways	0		0 (0)	1	1	12	HMDB00214;HMDB00187;HMDB00162;HMDB00696;HMDB00167;HMDB03406;HMDB00168;HMDB00172;HMDB00159;HMDB00929;HMDB00158;HMDB13773;HMDB00687	36 (51)	0.000271	0.0264	0.000271	0.0264
719	Zinc	ZnO NP-NM110 06h	Up	tRNA charging	HumanCyc	3	ENSG00000134905;ENSG00000134684;ENSG00000140105	38 (41)	0.987	1	10	HMDB00187;HMDB00162;HMDB00696;HMDB00167;HMDB00168;HMDB00172;HMDB00159;HMDB00929;HMDB00158;HMDB13773;HMDB00687	20 (24)	1.54e-05	0.00513	0.000184	0.0266
720	Zinc	ZnO NP-NM110 06h	Up	Activated TLR4 signalling	Reactome	40	ENSG00000104695;ENSG00000177606;ENSG00000221983;ENSG00000065559;ENSG00000170315;ENSG00000131323;ENSG00000150991;ENSG00000175104;ENSG00000072401;ENSG00000136560;ENSG00000109332;ENSG00000269335;ENSG00000177889;ENSG00000150455;ENSG00000162889;ENSG00000170345;ENSG00000168884;ENSG00000127666;ENSG00000139946;ENSG00000100906;ENSG00000104825;ENSG00000136869;ENSG00000109320;ENSG00000134070;ENSG00000110330…	108 (117)	1.72e-05	0.00297	0		1 (16)	1	1	0.000206	0.0276
721	Zinc	ZnO NP-NM110 06h	Up	MAPK signaling pathway - Homo sapiens (human)	KEGG	68	ENSG00000105329;ENSG00000136997;ENSG00000101109;ENSG00000099860;ENSG00000177606;ENSG00000128591;ENSG00000130522;ENSG00000065559;ENSG00000182389;ENSG00000127191;ENSG00000175104;ENSG00000213281;ENSG00000221823;ENSG00000169967;ENSG00000113319;ENSG00000153233;ENSG00000162889;ENSG00000109756;ENSG00000170345;ENSG00000120129;ENSG00000158050;ENSG00000125952;ENSG00000109320;ENSG00000077150;ENSG00000099875…	216 (255)	1.86e-05	0.00298	0		1 (5)	1	1	0.000222	0.0276
722	Zinc	ZnO NP-NM110 06h	Up	Cell-Cell communication	Reactome	36	ENSG00000124171;ENSG00000120899;ENSG00000072110;ENSG00000128591;ENSG00000173801;ENSG00000169756;ENSG00000065618;ENSG00000158769;ENSG00000162458;ENSG00000113946;ENSG00000089159;ENSG00000178184;ENSG00000196878;ENSG00000183853;ENSG00000130396;ENSG00000058085;ENSG00000130402;ENSG00000106404;ENSG00000189143;ENSG00000198053;ENSG00000044115;ENSG00000178209;ENSG00000107643;ENSG00000073712;ENSG00000010810…	107 (131)	0.000414	0.0279	0		0 (4)	1	1	0.000414	0.0279
723	Zinc	ZnO NP-NM110 06h	Up	ATF-2 transcription factor network	PID	21	ENSG00000067955;ENSG00000143507;ENSG00000175197;ENSG00000091831;ENSG00000140044;ENSG00000113648;ENSG00000087085;ENSG00000177606;ENSG00000162772;ENSG00000130522;ENSG00000122861;ENSG00000170345;ENSG00000120129;ENSG00000171223;ENSG00000171552;ENSG00000138166;ENSG00000169429;ENSG00000184545;ENSG00000175183;ENSG00000184557;ENSG00000107643	52 (61)	0.000442	0.0294	0		0 (3)	1	1	0.000442	0.0294
724	Zinc	ZnO NP-NM110 06h	Up	NOD-like receptor signaling pathway - Homo sapiens (human)	KEGG	44	ENSG00000169429;ENSG00000177606;ENSG00000196954;ENSG00000127191;ENSG00000131323;ENSG00000175104;ENSG00000150782;ENSG00000136560;ENSG00000163297;ENSG00000139112;ENSG00000269335;ENSG00000092439;ENSG00000096384;ENSG00000145782;ENSG00000156026;ENSG00000100906;ENSG00000104825;ENSG00000142185;ENSG00000136869;ENSG00000151414;ENSG00000101966;ENSG00000109320;ENSG00000110330;ENSG00000023445;ENSG00000117226…	139 (170)	0.000464	0.0296	0		0 (15)	1	1	0.000464	0.0296
725	Zinc	ZnO NP-NM110 06h	Up	RANKL	NetPath	11	ENSG00000131323;ENSG00000083799;ENSG00000056558;ENSG00000161011;ENSG00000131100;ENSG00000127191;ENSG00000169398;ENSG00000175104;ENSG00000109320;ENSG00000077150;ENSG00000141655	20 (23)	0.000464	0.0296	0		0 (0)	1	1	0.000464	0.0296
726	Zinc	ZnO NP-NM110 06h	Up	TWEAK	NetPath	13	ENSG00000006327;ENSG00000110330;ENSG00000077150;ENSG00000127191;ENSG00000215788;ENSG00000056558;ENSG00000173039;ENSG00000131323;ENSG00000082701;ENSG00000109320;ENSG00000136238;ENSG00000100906;ENSG00000107643	26 (28)	0.000485	0.0296	0		0 (0)	1	1	0.000485	0.0296
727	Zinc	ZnO NP-NM110 06h	Up	NF-kB is activated and signals survival	Reactome	8	ENSG00000173039;ENSG00000161011;ENSG00000221983;ENSG00000170315;ENSG00000150991;ENSG00000175104;ENSG00000109320;ENSG00000100906	12 (14)	0.0005	0.03	0		0 (2)	1	1	0.0005	0.03
728	Zinc	ZnO NP-NM110 06h	Up	Toll Like Receptor 4 (TLR4) Cascade	Reactome	42	ENSG00000104695;ENSG00000177606;ENSG00000221983;ENSG00000065559;ENSG00000170315;ENSG00000131323;ENSG00000150991;ENSG00000175104;ENSG00000072401;ENSG00000136560;ENSG00000109332;ENSG00000269335;ENSG00000177889;ENSG00000150455;ENSG00000162889;ENSG00000170345;ENSG00000168884;ENSG00000127666;ENSG00000139946;ENSG00000100906;ENSG00000104825;ENSG00000136869;ENSG00000197959;ENSG00000109320;ENSG00000134070…	117 (128)	2.57e-05	0.00383	0		1 (16)	1	1	0.000298	0.0316
729	Zinc	ZnO NP-NM110 06h	Up	Aminoacyl-tRNA biosynthesis - Homo sapiens (human)	KEGG	3	ENSG00000134905;ENSG00000140105;ENSG00000134684	50 (66)	0.998	1	10	HMDB00187;HMDB00162;HMDB00696;HMDB00167;HMDB00168;HMDB00172;HMDB00159;HMDB00929;HMDB00158;HMDB13773;HMDB00687	21 (52)	2.67e-05	0.00513	0.000308	0.0316
730	Zinc	ZnO NP-NM110 06h	Up	leukotriene biosynthesis	HumanCyc	0		2 (5)	1	1	10	HMDB00187;HMDB00162;HMDB00696;HMDB00167;HMDB00168;HMDB00172;HMDB00159;HMDB00929;HMDB00158;HMDB13773;HMDB00687	21 (30)	2.67e-05	0.00513	0.000308	0.0316
731	Zinc	ZnO NP-NM110 06h	Up	Ovarian tumor domain proteases	Reactome	16	ENSG00000131323;ENSG00000091831;ENSG00000150991;ENSG00000269335;ENSG00000180667;ENSG00000068308;ENSG00000145901;ENSG00000221983;ENSG00000170315;ENSG00000168884;ENSG00000169914;ENSG00000175104;ENSG00000118503;ENSG00000072401;ENSG00000121060;ENSG00000169918	36 (37)	0.000599	0.0345	0		0 (5)	1	1	0.000599	0.0345
732	Zinc	ZnO NP-NM110 06h	Up	JAK STAT MolecularVariation 1	INOH	22	ENSG00000159128;ENSG00000095752;ENSG00000168811;ENSG00000187266;ENSG00000084652;ENSG00000150782;ENSG00000243646;ENSG00000160712;ENSG00000128342;ENSG00000226979;ENSG00000177663;ENSG00000145623;ENSG00000196083;ENSG00000115604;ENSG00000077238;ENSG00000113494;ENSG00000134352;ENSG00000170581;ENSG00000168685;ENSG00000169429;ENSG00000166888;ENSG00000159110	57 (98)	0.000684	0.0389	0		0 (3)	1	1	0.000684	0.0389
733	Zinc	ZnO NP-NM110 06h	Up	Adipogenesis	Wikipathways	36	ENSG00000105329;ENSG00000124762;ENSG00000099860;ENSG00000164330;ENSG00000125378;ENSG00000101577;ENSG00000003137;ENSG00000160789;ENSG00000118263;ENSG00000149187;ENSG00000172216;ENSG00000067082;ENSG00000122877;ENSG00000116016;ENSG00000128342;ENSG00000162998;ENSG00000152601;ENSG00000184557;ENSG00000106366;ENSG00000181856;ENSG00000116604;ENSG00000101412;ENSG00000205250;ENSG00000137309;ENSG00000112033…	110 (131)	0.000745	0.0414	0		0 (0)	1	1	0.000745	0.0414
734	Zinc	ZnO NP-NM110 06h	Up	adp-ribosylation factor	BioCarta	13	ENSG00000122218;ENSG00000100196;ENSG00000089820;ENSG00000100852;ENSG00000008256;ENSG00000105443;ENSG00000108669;ENSG00000151693;ENSG00000153317;ENSG00000047365;ENSG00000186635;ENSG00000122705;ENSG00000175416	27 (29)	0.000768	0.0414	0		0 (2)	1	1	0.000768	0.0414
735	Zinc	ZnO NP-NM110 06h	Up	miR-targeted genes in lymphocytes - TarBase	Wikipathways	104	ENSG00000124762;ENSG00000124151;ENSG00000096070;ENSG00000117143;ENSG00000033627;ENSG00000006831;ENSG00000172216;ENSG00000068024;ENSG00000164938;ENSG00000196923;ENSG00000167601;ENSG00000113615;ENSG00000110880;ENSG00000152601;ENSG00000156273;ENSG00000147533;ENSG00000012660;ENSG00000142186;ENSG00000092531;ENSG00000114383;ENSG00000067955;ENSG00000143384;ENSG00000128524;ENSG00000110218;ENSG00000153250…	399 (486)	0.000802	0.0414	0		0 (0)	1	1	0.000802	0.0414
736	Zinc	ZnO NP-NM110 06h	Up	Wnt Signaling Pathway Netpath	Wikipathways	19	ENSG00000155252;ENSG00000136997;ENSG00000152661;ENSG00000136238;ENSG00000113712;ENSG00000141551;ENSG00000126583;ENSG00000159692;ENSG00000165699;ENSG00000169118;ENSG00000163785;ENSG00000082701;ENSG00000087095;ENSG00000148737;ENSG00000213923;ENSG00000103126;ENSG00000132170;ENSG00000105810;ENSG00000107643	47 (51)	0.000806	0.0414	0		0 (0)	1	1	0.000806	0.0414
737	Zinc	ZnO NP-NM110 06h	Up	Prolactin	NetPath	24	ENSG00000120833;ENSG00000177606;ENSG00000151090;ENSG00000198618;ENSG00000146648;ENSG00000160293;ENSG00000170345;ENSG00000091831;ENSG00000109320;ENSG00000100906;ENSG00000184557;ENSG00000089159;ENSG00000173039;ENSG00000198053;ENSG00000107643;ENSG00000169032;ENSG00000196262;ENSG00000010810;ENSG00000170027;ENSG00000166167;ENSG00000113494;ENSG00000169398;ENSG00000082701;ENSG00000072803	65 (70)	0.000843	0.0418	0		0 (0)	1	1	0.000843	0.0418
738	Zinc	ZnO NP-NM110 06h	Up	Signaling by Interleukins	Reactome	87	ENSG00000243646;ENSG00000095752;ENSG00000168811;ENSG00000008517;ENSG00000175104;ENSG00000150782;ENSG00000006016;ENSG00000198369;ENSG00000075413;ENSG00000070182;ENSG00000120129;ENSG00000137218;ENSG00000166225;ENSG00000134070;ENSG00000115607;ENSG00000115604;ENSG00000259207;ENSG00000188766;ENSG00000169398;ENSG00000033327;ENSG00000166888;ENSG00000089234;ENSG00000124882;ENSG00000137877;ENSG00000120899…	299 (373)	4.05e-05	0.00525	0		3 (24)	1	1	0.00045	0.0435
739	Zinc	ZnO NP-NM110 06h	Up	keratinocyte differentiation	BioCarta	20	ENSG00000134954;ENSG00000127191;ENSG00000156711;ENSG00000169032;ENSG00000269335;ENSG00000034152;ENSG00000170345;ENSG00000071054;ENSG00000110330;ENSG00000023445;ENSG00000177606;ENSG00000126583;ENSG00000027075;ENSG00000065559;ENSG00000056558;ENSG00000173039;ENSG00000100906;ENSG00000146648;ENSG00000171132;ENSG00000107643	51 (53)	0.000936	0.0444	0		0 (5)	1	1	0.000936	0.0444
740	Zinc	ZnO NP-NM110 06h	Up	<i>S</i>-methyl-5-thio-&alpha;-D-ribose 1-phosphate degradation	HumanCyc	0		4 (4)	1	1	10	HMDB00187;HMDB00162;HMDB00696;HMDB00167;HMDB00168;HMDB00172;HMDB00159;HMDB00929;HMDB00158;HMDB13773;HMDB00687	22 (35)	4.46e-05	0.00513	0.000492	0.0451
741	Zinc	ZnO NP-NM110 06h	Up	TNFR2 non-canonical NF-kB pathway	Reactome	15	ENSG00000131323;ENSG00000006327;ENSG00000166167;ENSG00000110330;ENSG00000023445;ENSG00000215788;ENSG00000226979;ENSG00000127191;ENSG00000104856;ENSG00000049249;ENSG00000077150;ENSG00000141655;ENSG00000072803;ENSG00000006062;ENSG00000101017	34 (52)	0.00097	0.0456	0		0 (3)	1	1	0.00097	0.0456
742	Zinc	ZnO NP-NM110 06h	Up	EGF-Core	Signalink	33	ENSG00000136997;ENSG00000101109;ENSG00000177606;ENSG00000065559;ENSG00000213281;ENSG00000146648;ENSG00000162889;ENSG00000113070;ENSG00000170345;ENSG00000125952;ENSG00000099875;ENSG00000134954;ENSG00000109321;ENSG00000173327;ENSG00000166949;ENSG00000126767;ENSG00000111145;ENSG00000158711;ENSG00000169967;ENSG00000166484;ENSG00000107643;ENSG00000156711;ENSG00000169032;ENSG00000034152;ENSG00000071054…	100 (105)	0.00103	0.0466	0		0 (0)	1	1	0.00103	0.0466
743	Zinc	ZnO NP-NM110 06h	Up	Cytokine-cytokine receptor interaction - Homo sapiens (human)	KEGG	46	ENSG00000150630;ENSG00000162892;ENSG00000006327;ENSG00000243646;ENSG00000095752;ENSG00000168811;ENSG00000187266;ENSG00000215788;ENSG00000049249;ENSG00000150782;ENSG00000159128;ENSG00000146648;ENSG00000122641;ENSG00000145623;ENSG00000241839;ENSG00000054967;ENSG00000128342;ENSG00000175505;ENSG00000105976;ENSG00000101017;ENSG00000168685;ENSG00000226979;ENSG00000160712;ENSG00000177663;ENSG00000141655…	152 (265)	0.00103	0.0466	0		0 (0)	1	1	0.00103	0.0466
744	Zinc	ZnO NP-NM110 06h	Up	toll-like receptor pathway	BioCarta	14	ENSG00000269335;ENSG00000034152;ENSG00000170345;ENSG00000078902;ENSG00000173039;ENSG00000177606;ENSG00000065559;ENSG00000150455;ENSG00000126767;ENSG00000175104;ENSG00000100906;ENSG00000136869;ENSG00000006062;ENSG00000107643	31 (36)	0.00108	0.0466	0		0 (1)	1	1	0.00108	0.0466
745	Zinc	ZnO NP-NM110 06h	Up	TP53 Regulates Transcription of Cell Cycle Genes	Wikipathways	8	ENSG00000124762;ENSG00000101412;ENSG00000118495;ENSG00000173846;ENSG00000159388;ENSG00000102760;ENSG00000175793;ENSG00000116017	13 (13)	0.00108	0.0466	0		0 (2)	1	1	0.00108	0.0466
746	Zinc	ZnO NP-NM110 06h	Up	Regulation of toll-like receptor signaling pathway	Wikipathways	36	ENSG00000083799;ENSG00000168811;ENSG00000177606;ENSG00000065559;ENSG00000131323;ENSG00000175104;ENSG00000119326;ENSG00000135148;ENSG00000078902;ENSG00000170345;ENSG00000068308;ENSG00000171608;ENSG00000161011;ENSG00000150455;ENSG00000127666;ENSG00000077150;ENSG00000100906;ENSG00000136869;ENSG00000101017;ENSG00000269335;ENSG00000134070;ENSG00000139946;ENSG00000011275;ENSG00000169429;ENSG00000173039…	112 (143)	0.00108	0.0466	0		0 (2)	1	1	0.00108	0.0466
747	Zinc	ZnO NP-NM110 06h	Up	miR-targeted genes in squamous cell - TarBase	Wikipathways	38	ENSG00000198431;ENSG00000111371;ENSG00000134294;ENSG00000105976;ENSG00000072682;ENSG00000142669;ENSG00000196313;ENSG00000113732;ENSG00000186575;ENSG00000028203;ENSG00000137575;ENSG00000196923;ENSG00000006831;ENSG00000167601;ENSG00000104812;ENSG00000115310;ENSG00000132002;ENSG00000128567;ENSG00000147533;ENSG00000012660;ENSG00000102531;ENSG00000112242;ENSG00000128524;ENSG00000241878;ENSG00000137309…	120 (159)	0.00109	0.0466	0		0 (0)	1	1	0.00109	0.0466
748	Zinc	ZnO NP-NM110 06h	Up	miR-targeted genes in leukocytes - TarBase	Wikipathways	39	ENSG00000198431;ENSG00000132002;ENSG00000096070;ENSG00000135919;ENSG00000033627;ENSG00000172216;ENSG00000113732;ENSG00000196313;ENSG00000142669;ENSG00000113615;ENSG00000110880;ENSG00000104812;ENSG00000115310;ENSG00000159176;ENSG00000187024;ENSG00000147533;ENSG00000142186;ENSG00000092531;ENSG00000114383;ENSG00000104783;ENSG00000143384;ENSG00000131236;ENSG00000128524;ENSG00000241878;ENSG00000137309…	124 (156)	0.00109	0.0466	0		0 (0)	1	1	0.00109	0.0466
749	Zinc	ZnO NP-NM110 06h	Up	Apoptosis-related network due to altered Notch3 in ovarian cancer	Wikipathways	20	ENSG00000144381;ENSG00000124762;ENSG00000178607;ENSG00000134954;ENSG00000106211;ENSG00000165806;ENSG00000120899;ENSG00000146072;ENSG00000044115;ENSG00000161011;ENSG00000130522;ENSG00000056558;ENSG00000169398;ENSG00000164111;ENSG00000109320;ENSG00000168685;ENSG00000103126;ENSG00000097007;ENSG00000120889;ENSG00000184557	52 (53)	0.00124	0.0498	0		0 (0)	1	1	0.00124	0.0498
750	Zinc	ZnO NP-NM110 06h	Down	Cell Cycle	Reactome	210	ENSG00000111276;ENSG00000047410;ENSG00000121621;ENSG00000149554;ENSG00000188229;ENSG00000143228;ENSG00000136492;ENSG00000129534;ENSG00000125450;ENSG00000175054;ENSG00000115163;ENSG00000148229;ENSG00000145241;ENSG00000186871;ENSG00000138778;ENSG00000037042;ENSG00000166037;ENSG00000123080;ENSG00000270882;ENSG00000072501;ENSG00000123485;ENSG00000152253;ENSG00000175216;ENSG00000112984;ENSG00000094880…	508 (551)	9.42e-24	4.07e-20	0		6 (32)	1	1	5.09e-22	9.58e-19
751	Zinc	ZnO NP-NM110 06h	Down	Cell Cycle_ Mitotic	Reactome	183	ENSG00000111276;ENSG00000123080;ENSG00000121621;ENSG00000188229;ENSG00000125450;ENSG00000115163;ENSG00000148229;ENSG00000145241;ENSG00000186871;ENSG00000138778;ENSG00000037042;ENSG00000166037;ENSG00000047410;ENSG00000072501;ENSG00000152253;ENSG00000175216;ENSG00000112984;ENSG00000094880;ENSG00000073111;ENSG00000112118;ENSG00000104738;ENSG00000100297;ENSG00000076003;ENSG00000163539;ENSG00000110092…	430 (468)	1.87e-22	4.05e-19	0		6 (29)	1	1	9.57e-21	9e-18
752	Zinc	ZnO NP-NM110 06h	Down	Retinoblastoma (RB) in Cancer	Wikipathways	53	ENSG00000112576;ENSG00000072501;ENSG00000176890;ENSG00000111276;ENSG00000085840;ENSG00000149554;ENSG00000116062;ENSG00000221829;ENSG00000116478;ENSG00000138376;ENSG00000108055;ENSG00000171848;ENSG00000162521;ENSG00000102054;ENSG00000157456;ENSG00000175305;ENSG00000100479;ENSG00000228716;ENSG00000117748;ENSG00000136824;ENSG00000080503;ENSG00000071794;ENSG00000164032;ENSG00000090889;ENSG00000101945…	87 (89)	5.13e-15	7.38e-12	0		0 (0)	1	1	5.13e-15	7.38e-12
753	Zinc	ZnO NP-NM110 06h	Down	Mitotic Prometaphase	Reactome	58	ENSG00000161888;ENSG00000121621;ENSG00000113575;ENSG00000153201;ENSG00000102901;ENSG00000120253;ENSG00000066027;ENSG00000109805;ENSG00000112640;ENSG00000030066;ENSG00000125450;ENSG00000115163;ENSG00000149503;ENSG00000072864;ENSG00000186871;ENSG00000138778;ENSG00000117724;ENSG00000157456;ENSG00000075188;ENSG00000101266;ENSG00000153044;ENSG00000072501;ENSG00000007168;ENSG00000102384;ENSG00000152253…	109 (113)	9.93e-13	1.07e-09	0		1 (6)	1	1	2.84e-11	1.78e-08
754	Zinc	ZnO NP-NM110 06h	Down	Separation of Sister Chromatids	Reactome	59	ENSG00000161888;ENSG00000121621;ENSG00000113575;ENSG00000153201;ENSG00000143228;ENSG00000102901;ENSG00000066027;ENSG00000078304;ENSG00000112640;ENSG00000030066;ENSG00000170142;ENSG00000125450;ENSG00000115163;ENSG00000080986;ENSG00000072864;ENSG00000186871;ENSG00000138778;ENSG00000117724;ENSG00000153107;ENSG00000075188;ENSG00000130177;ENSG00000153044;ENSG00000072501;ENSG00000007168;ENSG00000176248…	119 (124)	3.05e-11	2.52e-08	0		0 (2)	1	1	3.05e-11	2.52e-08
755	Zinc	ZnO NP-NM110 06h	Down	Cell cycle - Homo sapiens (human)	KEGG	56	ENSG00000112576;ENSG00000111276;ENSG00000253729;ENSG00000085840;ENSG00000123080;ENSG00000164815;ENSG00000134057;ENSG00000105325;ENSG00000116478;ENSG00000103479;ENSG00000157456;ENSG00000101972;ENSG00000123374;ENSG00000175054;ENSG00000108055;ENSG00000153107;ENSG00000135336;ENSG00000175305;ENSG00000080839;ENSG00000006634;ENSG00000130177;ENSG00000072501;ENSG00000176248;ENSG00000156970;ENSG00000073111…	118 (124)	8.14e-10	3.51e-07	0		0 (0)	1	1	8.14e-10	3.51e-07
756	Zinc	ZnO NP-NM110 06h	Down	Mitotic Metaphase and Anaphase	Reactome	63	ENSG00000161888;ENSG00000121621;ENSG00000113575;ENSG00000153201;ENSG00000143228;ENSG00000102901;ENSG00000028116;ENSG00000066027;ENSG00000078304;ENSG00000112640;ENSG00000101972;ENSG00000170142;ENSG00000125450;ENSG00000112029;ENSG00000113368;ENSG00000115163;ENSG00000080986;ENSG00000072864;ENSG00000186871;ENSG00000138778;ENSG00000117724;ENSG00000153107;ENSG00000075188;ENSG00000130177;ENSG00000153044…	131 (136)	3.5e-11	2.52e-08	0		1 (4)	1	1	8.78e-10	4.13e-07
757	Zinc	ZnO NP-NM110 06h	Down	M Phase	Reactome	96	ENSG00000047410;ENSG00000121621;ENSG00000125450;ENSG00000115163;ENSG00000149503;ENSG00000145241;ENSG00000186871;ENSG00000138778;ENSG00000117724;ENSG00000072501;ENSG00000152253;ENSG00000175216;ENSG00000094880;ENSG00000163539;ENSG00000213024;ENSG00000149636;ENSG00000155561;ENSG00000120539;ENSG00000180573;ENSG00000109805;ENSG00000170142;ENSG00000112029;ENSG00000080986;ENSG00000153107;ENSG00000075188…	236 (267)	6.28e-11	3.88e-08	0		5 (18)	1	1	1.54e-09	5.79e-07
758	Zinc	ZnO NP-NM110 06h	Down	Mitotic Anaphase	Reactome	62	ENSG00000161888;ENSG00000121621;ENSG00000113575;ENSG00000153201;ENSG00000143228;ENSG00000102901;ENSG00000028116;ENSG00000066027;ENSG00000078304;ENSG00000112640;ENSG00000101972;ENSG00000170142;ENSG00000125450;ENSG00000113368;ENSG00000115163;ENSG00000080986;ENSG00000072864;ENSG00000186871;ENSG00000138778;ENSG00000117724;ENSG00000153107;ENSG00000075188;ENSG00000130177;ENSG00000153044;ENSG00000072501…	130 (135)	7.8e-11	4.21e-08	0		1 (4)	1	1	1.89e-09	5.94e-07
759	Zinc	ZnO NP-NM110 06h	Down	Resolution of Sister Chromatid Cohesion	Reactome	51	ENSG00000161888;ENSG00000121621;ENSG00000113575;ENSG00000153201;ENSG00000102901;ENSG00000066027;ENSG00000078304;ENSG00000112640;ENSG00000030066;ENSG00000125450;ENSG00000115163;ENSG00000149503;ENSG00000072864;ENSG00000186871;ENSG00000138778;ENSG00000117724;ENSG00000157456;ENSG00000075188;ENSG00000153044;ENSG00000072501;ENSG00000007168;ENSG00000102384;ENSG00000152253;ENSG00000175216;ENSG00000069248…	100 (104)	1.81e-10	8.68e-08	0		1 (6)	1	1	4.24e-09	1.14e-06
760	Zinc	ZnO NP-NM110 06h	Down	Cell Cycle Checkpoints	Reactome	62	ENSG00000197299;ENSG00000111276;ENSG00000085840;ENSG00000164815;ENSG00000178966;ENSG00000149554;ENSG00000006634;ENSG00000136492;ENSG00000113456;ENSG00000174371;ENSG00000172977;ENSG00000164053;ENSG00000012048;ENSG00000175054;ENSG00000170142;ENSG00000153107;ENSG00000135336;ENSG00000101773;ENSG00000157456;ENSG00000175305;ENSG00000130177;ENSG00000270882;ENSG00000270276;ENSG00000075218;ENSG00000176248…	142 (158)	6.42e-09	2.31e-06	0		0 (3)	1	1	6.42e-09	2.31e-06
761	Zinc	ZnO NP-NM110 06h	Down	SUMO E3 ligases SUMOylate target proteins	Reactome	45	ENSG00000197299;ENSG00000047410;ENSG00000168283;ENSG00000095319;ENSG00000172845;ENSG00000153201;ENSG00000094914;ENSG00000277258;ENSG00000182979;ENSG00000058804;ENSG00000030066;ENSG00000125450;ENSG00000012048;ENSG00000131788;ENSG00000111581;ENSG00000108055;ENSG00000010803;ENSG00000075188;ENSG00000072501;ENSG00000132182;ENSG00000163029;ENSG00000213024;ENSG00000069248;ENSG00000120253;ENSG00000165119…	92 (98)	1.15e-08	3.55e-06	0		0 (0)	1	1	1.15e-08	3.55e-06
762	Zinc	ZnO NP-NM110 06h	Down	mRNA Processing	Wikipathways	54	ENSG00000109606;ENSG00000167005;ENSG00000138668;ENSG00000133226;ENSG00000105705;ENSG00000072501;ENSG00000160917;ENSG00000165819;ENSG00000188529;ENSG00000116560;ENSG00000136450;ENSG00000161547;ENSG00000116350;ENSG00000124193;ENSG00000115875;ENSG00000061936;ENSG00000136527;ENSG00000064607;ENSG00000136875;ENSG00000100836;ENSG00000117569;ENSG00000099995;ENSG00000147274;ENSG00000181222;ENSG00000060688…	123 (127)	4.82e-08	1.3e-05	0		0 (2)	1	1	4.82e-08	1.3e-05
763	Zinc	ZnO NP-NM110 06h	Down	DNA Replication	Reactome	34	ENSG00000111276;ENSG00000085840;ENSG00000164815;ENSG00000105486;ENSG00000105325;ENSG00000181938;ENSG00000135336;ENSG00000006634;ENSG00000100479;ENSG00000168496;ENSG00000131153;ENSG00000147536;ENSG00000073111;ENSG00000112118;ENSG00000104738;ENSG00000100297;ENSG00000076003;ENSG00000167513;ENSG00000077514;ENSG00000148229;ENSG00000065328;ENSG00000035928;ENSG00000094804;ENSG00000133119;ENSG00000111445…	59 (60)	3.25e-09	1.28e-06	0		2 (14)	1	1	6.67e-08	1.57e-05
764	Zinc	ZnO NP-NM110 06h	Down	Organelle biogenesis and maintenance	Reactome	107	ENSG00000138686;ENSG00000119977;ENSG00000103351;ENSG00000107862;ENSG00000072864;ENSG00000262814;ENSG00000135900;ENSG00000103769;ENSG00000185414;ENSG00000108826;ENSG00000055950;ENSG00000005249;ENSG00000159111;ENSG00000125124;ENSG00000061794;ENSG00000140463;ENSG00000101624;ENSG00000139350;ENSG00000204843;ENSG00000186638;ENSG00000131462;ENSG00000132313;ENSG00000011143;ENSG00000167461;ENSG00000168385…	293 (310)	8e-09	2.66e-06	0		3 (53)	1	1	1.57e-07	3.29e-05
765	Zinc	ZnO NP-NM110 06h	Down	Activation of ATR in response to replication stress	Reactome	23	ENSG00000085840;ENSG00000164815;ENSG00000164053;ENSG00000175054;ENSG00000135336;ENSG00000006634;ENSG00000113456;ENSG00000133119;ENSG00000073111;ENSG00000112118;ENSG00000104738;ENSG00000100297;ENSG00000076003;ENSG00000149554;ENSG00000065328;ENSG00000094804;ENSG00000092853;ENSG00000111445;ENSG00000132383;ENSG00000117748;ENSG00000123374;ENSG00000152942;ENSG00000097046	37 (37)	1.71e-07	3.35e-05	0		0 (2)	1	1	1.71e-07	3.35e-05
766	Zinc	ZnO NP-NM110 06h	Down	G2/M Checkpoints	Reactome	47	ENSG00000197299;ENSG00000085840;ENSG00000164815;ENSG00000178966;ENSG00000136492;ENSG00000113456;ENSG00000174371;ENSG00000172977;ENSG00000164053;ENSG00000012048;ENSG00000175054;ENSG00000135336;ENSG00000101773;ENSG00000157456;ENSG00000006634;ENSG00000270882;ENSG00000270276;ENSG00000075218;ENSG00000133119;ENSG00000175643;ENSG00000104320;ENSG00000138376;ENSG00000188486;ENSG00000158373;ENSG00000073111…	106 (121)	2.47e-07	4.63e-05	0		0 (3)	1	1	2.47e-07	4.63e-05
767	Zinc	ZnO NP-NM110 06h	Down	Cell Cycle	Wikipathways	44	ENSG00000112576;ENSG00000111276;ENSG00000085840;ENSG00000164815;ENSG00000149554;ENSG00000080839;ENSG00000116478;ENSG00000006634;ENSG00000094631;ENSG00000175054;ENSG00000135336;ENSG00000157456;ENSG00000175305;ENSG00000072501;ENSG00000134057;ENSG00000156970;ENSG00000134982;ENSG00000073111;ENSG00000112118;ENSG00000104738;ENSG00000100297;ENSG00000076003;ENSG00000133740;ENSG00000253729;ENSG00000065328…	98 (103)	3.85e-07	6.93e-05	0		0 (0)	1	1	3.85e-07	6.93e-05
768	Zinc	ZnO NP-NM110 06h	Down	Aurora B signaling	PID	23	ENSG00000112984;ENSG00000036257;ENSG00000087586;ENSG00000137807;ENSG00000147526;ENSG00000109805;ENSG00000112640;ENSG00000065534;ENSG00000115163;ENSG00000149503;ENSG00000094916;ENSG00000010292;ENSG00000113810;ENSG00000161800;ENSG00000080986;ENSG00000136824;ENSG00000121152;ENSG00000134690;ENSG00000037474;ENSG00000142945;ENSG00000115053;ENSG00000178999;ENSG00000186298	39 (43)	6.61e-07	0.000102	0		0 (2)	1	1	6.61e-07	0.000102
769	Zinc	ZnO NP-NM110 06h	Down	SUMOylation	Reactome	46	ENSG00000197299;ENSG00000047410;ENSG00000168283;ENSG00000095319;ENSG00000172845;ENSG00000153201;ENSG00000094914;ENSG00000277258;ENSG00000182979;ENSG00000058804;ENSG00000030066;ENSG00000125450;ENSG00000012048;ENSG00000131788;ENSG00000111581;ENSG00000108055;ENSG00000010803;ENSG00000075188;ENSG00000072501;ENSG00000132182;ENSG00000163029;ENSG00000213024;ENSG00000069248;ENSG00000120253;ENSG00000165119…	98 (104)	4.01e-08	1.15e-05	0		1 (3)	1	1	7.23e-07	0.000136
770	Zinc	ZnO NP-NM110 06h	Down	S Phase	Reactome	40	ENSG00000171320;ENSG00000111276;ENSG00000085840;ENSG00000164815;ENSG00000105486;ENSG00000105325;ENSG00000181938;ENSG00000108055;ENSG00000100479;ENSG00000135336;ENSG00000175305;ENSG00000072501;ENSG00000117748;ENSG00000168496;ENSG00000131153;ENSG00000147536;ENSG00000073111;ENSG00000112118;ENSG00000104738;ENSG00000100297;ENSG00000076003;ENSG00000110092;ENSG00000167513;ENSG00000077514;ENSG00000148229…	81 (82)	5.32e-08	1.35e-05	0		2 (17)	1	1	9.45e-07	0.000158
771	Zinc	ZnO NP-NM110 06h	Down	Mitochondrial translation elongation	Reactome	42	ENSG00000105364;ENSG00000154719;ENSG00000181610;ENSG00000122140;ENSG00000242485;ENSG00000173141;ENSG00000159111;ENSG00000112996;ENSG00000132313;ENSG00000137547;ENSG00000082515;ENSG00000262814;ENSG00000136522;ENSG00000132591;ENSG00000204568;ENSG00000198015;ENSG00000162910;ENSG00000125901;ENSG00000074071;ENSG00000135900;ENSG00000185414;ENSG00000108826;ENSG00000055950;ENSG00000113048;ENSG00000167862…	87 (89)	5.7e-08	1.37e-05	0		1 (26)	1	1	1.01e-06	0.000158
772	Zinc	ZnO NP-NM110 06h	Down	SUMOylation of DNA damage response and repair proteins	Reactome	35	ENSG00000197299;ENSG00000047410;ENSG00000168283;ENSG00000095319;ENSG00000143799;ENSG00000153201;ENSG00000094914;ENSG00000277258;ENSG00000058804;ENSG00000101972;ENSG00000125450;ENSG00000012048;ENSG00000111581;ENSG00000108055;ENSG00000010803;ENSG00000075188;ENSG00000072501;ENSG00000132182;ENSG00000163029;ENSG00000069248;ENSG00000120253;ENSG00000154767;ENSG00000213024;ENSG00000141582;ENSG00000102900…	75 (78)	1.97e-06	0.000265	0		0 (0)	1	1	1.97e-06	0.000265
773	Zinc	ZnO NP-NM110 06h	Down	DNA Replication	Wikipathways	23	ENSG00000085840;ENSG00000164815;ENSG00000135336;ENSG00000006634;ENSG00000100479;ENSG00000073111;ENSG00000112118;ENSG00000104738;ENSG00000100297;ENSG00000076003;ENSG00000167513;ENSG00000077514;ENSG00000065328;ENSG00000035928;ENSG00000094804;ENSG00000133119;ENSG00000111445;ENSG00000132383;ENSG00000117748;ENSG00000112312;ENSG00000132646;ENSG00000123374;ENSG00000097046	41 (42)	2.22e-06	0.000271	0		0 (7)	1	1	2.22e-06	0.000271
774	Zinc	ZnO NP-NM110 06h	Down	snRNP Assembly	Reactome	27	ENSG00000047410;ENSG00000153201;ENSG00000094914;ENSG00000058804;ENSG00000125450;ENSG00000111581;ENSG00000092208;ENSG00000075188;ENSG00000100462;ENSG00000074201;ENSG00000132182;ENSG00000069248;ENSG00000120253;ENSG00000179409;ENSG00000082516;ENSG00000136937;ENSG00000064703;ENSG00000213024;ENSG00000095319;ENSG00000102900;ENSG00000152147;ENSG00000164902;ENSG00000100028;ENSG00000116455;ENSG00000030066…	52 (52)	2.26e-06	0.000271	0		0 (4)	1	1	2.26e-06	0.000271
775	Zinc	ZnO NP-NM110 06h	Down	Metabolism of non-coding RNA	Reactome	27	ENSG00000047410;ENSG00000153201;ENSG00000094914;ENSG00000058804;ENSG00000125450;ENSG00000111581;ENSG00000092208;ENSG00000075188;ENSG00000100462;ENSG00000074201;ENSG00000132182;ENSG00000069248;ENSG00000120253;ENSG00000179409;ENSG00000082516;ENSG00000136937;ENSG00000064703;ENSG00000213024;ENSG00000095319;ENSG00000102900;ENSG00000152147;ENSG00000164902;ENSG00000100028;ENSG00000116455;ENSG00000030066…	52 (52)	2.26e-06	0.000271	0		0 (4)	1	1	2.26e-06	0.000271
776	Zinc	ZnO NP-NM110 06h	Down	role of ran in mitotic spindle regulation	BioCarta	10	ENSG00000163808;ENSG00000087586;ENSG00000132341;ENSG00000099901;ENSG00000153201;ENSG00000180198;ENSG00000137497;ENSG00000088325;ENSG00000108424;ENSG00000182481	11 (11)	2.39e-06	0.000279	0		0 (2)	1	1	2.39e-06	0.000279
777	Zinc	ZnO NP-NM110 06h	Down	Synthesis of DNA	Reactome	30	ENSG00000111276;ENSG00000085840;ENSG00000164815;ENSG00000105486;ENSG00000105325;ENSG00000181938;ENSG00000135336;ENSG00000100479;ENSG00000168496;ENSG00000131153;ENSG00000147536;ENSG00000073111;ENSG00000112118;ENSG00000104738;ENSG00000100297;ENSG00000076003;ENSG00000167513;ENSG00000077514;ENSG00000148229;ENSG00000035928;ENSG00000094804;ENSG00000133119;ENSG00000111445;ENSG00000138346;ENSG00000132383…	55 (55)	1.49e-07	3.35e-05	0		1 (13)	1	1	2.49e-06	0.00035
778	Zinc	ZnO NP-NM110 06h	Down	RHO GTPases Activate Formins	Reactome	50	ENSG00000161888;ENSG00000143878;ENSG00000121621;ENSG00000113575;ENSG00000147202;ENSG00000153201;ENSG00000143228;ENSG00000102901;ENSG00000066027;ENSG00000078304;ENSG00000112640;ENSG00000125450;ENSG00000111581;ENSG00000080986;ENSG00000072864;ENSG00000186871;ENSG00000138778;ENSG00000117724;ENSG00000075188;ENSG00000153044;ENSG00000007168;ENSG00000102384;ENSG00000152253;ENSG00000175216;ENSG00000069248…	114 (118)	1.56e-07	3.35e-05	0		1 (7)	1	1	2.6e-06	0.00035
779	Zinc	ZnO NP-NM110 06h	Down	Regulation of TP53 Activity	Reactome	63	ENSG00000138346;ENSG00000197299;ENSG00000149480;ENSG00000113328;ENSG00000087586;ENSG00000178966;ENSG00000113575;ENSG00000165632;ENSG00000174371;ENSG00000136492;ENSG00000088325;ENSG00000112062;ENSG00000170633;ENSG00000172977;ENSG00000164053;ENSG00000187325;ENSG00000175054;ENSG00000074590;ENSG00000168556;ENSG00000204371;ENSG00000162521;ENSG00000102054;ENSG00000101773;ENSG00000118515;ENSG00000149136…	156 (163)	1.69e-07	3.35e-05	0		4 (13)	1	1	2.81e-06	0.000352
780	Zinc	ZnO NP-NM110 06h	Down	FOXM1 transcription factor network	PID	22	ENSG00000111206;ENSG00000134057;ENSG00000117650;ENSG00000115163;ENSG00000125817;ENSG00000072736;ENSG00000157456;ENSG00000117724;ENSG00000110092;ENSG00000087245;ENSG00000073050;ENSG00000101224;ENSG00000166851;ENSG00000145604;ENSG00000169856;ENSG00000005339;ENSG00000100393;ENSG00000105723;ENSG00000123374;ENSG00000145386;ENSG00000135446;ENSG00000178999	39 (43)	3.26e-06	0.00037	0		0 (0)	1	1	3.26e-06	0.00037
781	Zinc	ZnO NP-NM110 06h	Down	AURKA Activation by TPX2	Reactome	33	ENSG00000087586;ENSG00000213397;ENSG00000104833;ENSG00000188229;ENSG00000092036;ENSG00000127914;ENSG00000116127;ENSG00000148019;ENSG00000072864;ENSG00000126001;ENSG00000007168;ENSG00000249115;ENSG00000196230;ENSG00000088325;ENSG00000175216;ENSG00000005249;ENSG00000136861;ENSG00000141577;ENSG00000101639;ENSG00000101624;ENSG00000072571;ENSG00000117650;ENSG00000139350;ENSG00000166851;ENSG00000166037…	72 (75)	6.25e-06	0.000562	0		0 (2)	1	1	6.25e-06	0.000562
782	Zinc	ZnO NP-NM110 06h	Down	SUMOylation of RNA binding proteins	Reactome	24	ENSG00000047410;ENSG00000168283;ENSG00000095319;ENSG00000153201;ENSG00000094914;ENSG00000277258;ENSG00000058804;ENSG00000125450;ENSG00000111581;ENSG00000010803;ENSG00000075188;ENSG00000132182;ENSG00000069248;ENSG00000120253;ENSG00000213024;ENSG00000141582;ENSG00000102900;ENSG00000030066;ENSG00000141570;ENSG00000165119;ENSG00000163002;ENSG00000269897;ENSG00000173894;ENSG00000155561	46 (48)	7.39e-06	0.000651	0		0 (0)	1	1	7.39e-06	0.000651
783	Zinc	ZnO NP-NM110 06h	Down	Transport of Ribonucleoproteins into the Host Nucleus	Reactome	18	ENSG00000153201;ENSG00000111581;ENSG00000120253;ENSG00000047410;ENSG00000132182;ENSG00000075188;ENSG00000108424;ENSG00000069248;ENSG00000213024;ENSG00000094914;ENSG00000095319;ENSG00000102900;ENSG00000163002;ENSG00000058804;ENSG00000030066;ENSG00000114030;ENSG00000155561;ENSG00000125450	30 (30)	7.91e-06	0.00067	0		0 (0)	1	1	7.91e-06	0.00067
784	Zinc	ZnO NP-NM110 06h	Down	Recruitment of mitotic centrosome proteins and complexes	Reactome	35	ENSG00000213397;ENSG00000104833;ENSG00000188229;ENSG00000092036;ENSG00000275835;ENSG00000127914;ENSG00000116127;ENSG00000148019;ENSG00000072864;ENSG00000037042;ENSG00000126001;ENSG00000007168;ENSG00000249115;ENSG00000196230;ENSG00000137497;ENSG00000175216;ENSG00000005249;ENSG00000136861;ENSG00000141577;ENSG00000101639;ENSG00000101624;ENSG00000117650;ENSG00000126216;ENSG00000139350;ENSG00000166851…	79 (82)	8.46e-06	0.00069	0		0 (2)	1	1	8.46e-06	0.00069
785	Zinc	ZnO NP-NM110 06h	Down	Centrosome maturation	Reactome	35	ENSG00000213397;ENSG00000104833;ENSG00000188229;ENSG00000092036;ENSG00000275835;ENSG00000127914;ENSG00000116127;ENSG00000148019;ENSG00000072864;ENSG00000037042;ENSG00000126001;ENSG00000007168;ENSG00000249115;ENSG00000196230;ENSG00000137497;ENSG00000175216;ENSG00000005249;ENSG00000136861;ENSG00000141577;ENSG00000101639;ENSG00000101624;ENSG00000117650;ENSG00000126216;ENSG00000139350;ENSG00000166851…	79 (82)	8.46e-06	0.00069	0		0 (2)	1	1	8.46e-06	0.00069
786	Zinc	ZnO NP-NM110 06h	Down	multi-step regulation of transcription by pitx2	BioCarta	15	ENSG00000157240;ENSG00000254598;ENSG00000100393;ENSG00000196367;ENSG00000070018;ENSG00000005339;ENSG00000125686;ENSG00000112640;ENSG00000101266;ENSG00000131650;ENSG00000115718;ENSG00000116478;ENSG00000172977;ENSG00000198728;ENSG00000107984	23 (30)	1.09e-05	0.000873	0		0 (1)	1	1	1.09e-05	0.000873
787	Zinc	ZnO NP-NM110 06h	Down	ATR signaling pathway	PID	20	ENSG00000175054;ENSG00000104320;ENSG00000166851;ENSG00000132383;ENSG00000117748;ENSG00000111445;ENSG00000094804;ENSG00000075131;ENSG00000113575;ENSG00000111602;ENSG00000113456;ENSG00000138375;ENSG00000149554;ENSG00000073111;ENSG00000123374;ENSG00000145386;ENSG00000092853;ENSG00000152942;ENSG00000164053;ENSG00000133119	36 (37)	1.25e-05	0.000947	0		0 (0)	1	1	1.25e-05	0.000947
788	Zinc	ZnO NP-NM110 06h	Down	Mitochondrial translation	Reactome	42	ENSG00000105364;ENSG00000154719;ENSG00000181610;ENSG00000122140;ENSG00000242485;ENSG00000173141;ENSG00000159111;ENSG00000112996;ENSG00000132313;ENSG00000137547;ENSG00000082515;ENSG00000262814;ENSG00000136522;ENSG00000132591;ENSG00000204568;ENSG00000198015;ENSG00000162910;ENSG00000125901;ENSG00000074071;ENSG00000135900;ENSG00000185414;ENSG00000108826;ENSG00000055950;ENSG00000113048;ENSG00000167862…	93 (95)	5.8e-07	9.65e-05	0		2 (47)	1	1	8.92e-06	0.000966
789	Zinc	ZnO NP-NM110 06h	Down	Mitochondrial translation initiation	Reactome	40	ENSG00000105364;ENSG00000154719;ENSG00000181610;ENSG00000122140;ENSG00000242485;ENSG00000173141;ENSG00000159111;ENSG00000112996;ENSG00000137547;ENSG00000082515;ENSG00000262814;ENSG00000136522;ENSG00000132591;ENSG00000204568;ENSG00000198015;ENSG00000162910;ENSG00000125901;ENSG00000074071;ENSG00000135900;ENSG00000185414;ENSG00000108826;ENSG00000055950;ENSG00000113048;ENSG00000167862;ENSG00000135972…	87 (88)	6.03e-07	9.65e-05	0		2 (8)	1	1	9.24e-06	0.000966
790	Zinc	ZnO NP-NM110 06h	Down	Mitochondrial translation termination	Reactome	40	ENSG00000105364;ENSG00000154719;ENSG00000181610;ENSG00000122140;ENSG00000242485;ENSG00000173141;ENSG00000159111;ENSG00000112996;ENSG00000137547;ENSG00000082515;ENSG00000262814;ENSG00000136522;ENSG00000132591;ENSG00000204568;ENSG00000198015;ENSG00000162910;ENSG00000125901;ENSG00000074071;ENSG00000135900;ENSG00000185414;ENSG00000108826;ENSG00000055950;ENSG00000113048;ENSG00000167862;ENSG00000135972…	87 (88)	6.03e-07	9.65e-05	0		1 (25)	1	1	9.24e-06	0.000966
791	Zinc	ZnO NP-NM110 06h	Down	Presynaptic phase of homologous DNA pairing and strand exchange	Reactome	21	ENSG00000012048;ENSG00000175054;ENSG00000138346;ENSG00000174371;ENSG00000132383;ENSG00000117748;ENSG00000111445;ENSG00000172977;ENSG00000178966;ENSG00000104320;ENSG00000101773;ENSG00000171792;ENSG00000113456;ENSG00000136492;ENSG00000149554;ENSG00000197299;ENSG00000138376;ENSG00000152942;ENSG00000175643;ENSG00000164053;ENSG00000133119	39 (40)	1.45e-05	0.00103	0		0 (2)	1	1	1.45e-05	0.00103
792	Zinc	ZnO NP-NM110 06h	Down	Aurora A signaling	PID	18	ENSG00000196116;ENSG00000012048;ENSG00000129474;ENSG00000115163;ENSG00000108262;ENSG00000087586;ENSG00000101224;ENSG00000175216;ENSG00000178999;ENSG00000132341;ENSG00000105325;ENSG00000147526;ENSG00000141510;ENSG00000072062;ENSG00000112640;ENSG00000126787;ENSG00000013810;ENSG00000088325	31 (31)	1.5e-05	0.00103	0		0 (0)	1	1	1.5e-05	0.00103
793	Zinc	ZnO NP-NM110 06h	Down	Homologous DNA Pairing and Strand Exchange	Reactome	22	ENSG00000197299;ENSG00000178966;ENSG00000111247;ENSG00000136492;ENSG00000174371;ENSG00000172977;ENSG00000164053;ENSG00000012048;ENSG00000175054;ENSG00000101773;ENSG00000113456;ENSG00000175643;ENSG00000138376;ENSG00000104320;ENSG00000149554;ENSG00000133119;ENSG00000111445;ENSG00000138346;ENSG00000132383;ENSG00000117748;ENSG00000171792;ENSG00000152942	42 (43)	1.63e-05	0.0011	0		0 (2)	1	1	1.63e-05	0.0011
794	Zinc	ZnO NP-NM110 06h	Down	Processing of Capped Intron-Containing Pre-mRNA	Reactome	84	ENSG00000109606;ENSG00000167005;ENSG00000161981;ENSG00000047410;ENSG00000171566;ENSG00000133226;ENSG00000116350;ENSG00000105705;ENSG00000153201;ENSG00000084463;ENSG00000160917;ENSG00000165819;ENSG00000188529;ENSG00000094914;ENSG00000145833;ENSG00000136450;ENSG00000075188;ENSG00000058804;ENSG00000125450;ENSG00000101138;ENSG00000115875;ENSG00000087365;ENSG00000136527;ENSG00000161547;ENSG00000141543…	234 (248)	7.55e-07	0.000112	0		1 (4)	1	1	1.14e-05	0.00113
795	Zinc	ZnO NP-NM110 06h	Down	Nuclear import of Rev protein	Reactome	19	ENSG00000153201;ENSG00000111581;ENSG00000120253;ENSG00000069248;ENSG00000047410;ENSG00000132182;ENSG00000132341;ENSG00000075188;ENSG00000108424;ENSG00000180198;ENSG00000213024;ENSG00000094914;ENSG00000095319;ENSG00000102900;ENSG00000163002;ENSG00000058804;ENSG00000030066;ENSG00000155561;ENSG00000125450	34 (34)	1.84e-05	0.00122	0		0 (2)	1	1	1.84e-05	0.00122
796	Zinc	ZnO NP-NM110 06h	Down	HDR through Single Strand Annealing (SSA)	Reactome	20	ENSG00000012048;ENSG00000175054;ENSG00000138346;ENSG00000138376;ENSG00000132383;ENSG00000117748;ENSG00000111445;ENSG00000172977;ENSG00000178966;ENSG00000104320;ENSG00000101773;ENSG00000171792;ENSG00000113456;ENSG00000136492;ENSG00000175643;ENSG00000197299;ENSG00000174371;ENSG00000152942;ENSG00000164053;ENSG00000133119	37 (38)	2.16e-05	0.00137	0		0 (2)	1	1	2.16e-05	0.00137
797	Zinc	ZnO NP-NM110 06h	Down	Transport of Mature mRNA Derived from an Intronless Transcript	Reactome	21	ENSG00000111581;ENSG00000120253;ENSG00000047410;ENSG00000132182;ENSG00000136709;ENSG00000075188;ENSG00000136937;ENSG00000153201;ENSG00000069248;ENSG00000151247;ENSG00000160917;ENSG00000213024;ENSG00000094914;ENSG00000095319;ENSG00000102900;ENSG00000163002;ENSG00000058804;ENSG00000030066;ENSG00000155561;ENSG00000125450;ENSG00000165934	40 (43)	2.43e-05	0.00146	0		0 (0)	1	1	2.43e-05	0.00146
798	Zinc	ZnO NP-NM110 06h	Down	APC/C-mediated degradation of cell cycle proteins	Reactome	21	ENSG00000154473;ENSG00000112029;ENSG00000166851;ENSG00000004897;ENSG00000087586;ENSG00000170142;ENSG00000196510;ENSG00000134057;ENSG00000145386;ENSG00000105325;ENSG00000130177;ENSG00000153107;ENSG00000089053;ENSG00000123374;ENSG00000094880;ENSG00000053900;ENSG00000176248;ENSG00000117650;ENSG00000178999;ENSG00000156970;ENSG00000117399	40 (41)	2.43e-05	0.00146	0		0 (4)	1	1	2.43e-05	0.00146
799	Zinc	ZnO NP-NM110 06h	Down	Regulation of mitotic cell cycle	Reactome	21	ENSG00000154473;ENSG00000112029;ENSG00000166851;ENSG00000004897;ENSG00000087586;ENSG00000170142;ENSG00000196510;ENSG00000134057;ENSG00000145386;ENSG00000105325;ENSG00000130177;ENSG00000153107;ENSG00000089053;ENSG00000123374;ENSG00000094880;ENSG00000053900;ENSG00000176248;ENSG00000117650;ENSG00000178999;ENSG00000156970;ENSG00000117399	40 (41)	2.43e-05	0.00146	0		0 (4)	1	1	2.43e-05	0.00146
800	Zinc	ZnO NP-NM110 06h	Down	E2F transcription factor network	PID	32	ENSG00000112576;ENSG00000176890;ENSG00000111276;ENSG00000085840;ENSG00000123080;ENSG00000101773;ENSG00000099901;ENSG00000114166;ENSG00000175305;ENSG00000245848;ENSG00000012048;ENSG00000162521;ENSG00000094916;ENSG00000080839;ENSG00000103479;ENSG00000100462;ENSG00000228716;ENSG00000120868;ENSG00000080503;ENSG00000112118;ENSG00000133740;ENSG00000116478;ENSG00000073050;ENSG00000094804;ENSG00000167325…	73 (79)	2.65e-05	0.00157	0		0 (2)	1	1	2.65e-05	0.00157
801	Zinc	ZnO NP-NM110 06h	Down	Vpr-mediated nuclear import of PICs	Reactome	18	ENSG00000164985;ENSG00000111581;ENSG00000120253;ENSG00000047410;ENSG00000132182;ENSG00000075188;ENSG00000030066;ENSG00000069248;ENSG00000213024;ENSG00000094914;ENSG00000095319;ENSG00000102900;ENSG00000163002;ENSG00000058804;ENSG00000153201;ENSG00000114030;ENSG00000155561;ENSG00000125450	32 (32)	2.72e-05	0.00159	0		0 (0)	1	1	2.72e-05	0.00159
802	Zinc	ZnO NP-NM110 06h	Down	Fanconi anemia pathway	PID	23	ENSG00000197299;ENSG00000112039;ENSG00000178966;ENSG00000181544;ENSG00000183161;ENSG00000221829;ENSG00000136492;ENSG00000164053;ENSG00000012048;ENSG00000175054;ENSG00000113456;ENSG00000117748;ENSG00000188486;ENSG00000077152;ENSG00000104320;ENSG00000114315;ENSG00000149554;ENSG00000133119;ENSG00000111445;ENSG00000132383;ENSG00000162607;ENSG00000152942;ENSG00000114742	46 (46)	2.82e-05	0.00162	0		0 (0)	1	1	2.82e-05	0.00162
803	Zinc	ZnO NP-NM110 06h	Down	miR-targeted genes in muscle cell - TarBase	Wikipathways	101	ENSG00000136436;ENSG00000111276;ENSG00000138061;ENSG00000141736;ENSG00000065361;ENSG00000172572;ENSG00000188529;ENSG00000111530;ENSG00000141429;ENSG00000085224;ENSG00000065911;ENSG00000144827;ENSG00000134575;ENSG00000135535;ENSG00000117713;ENSG00000153922;ENSG00000115053;ENSG00000151247;ENSG00000102158;ENSG00000109586;ENSG00000160710;ENSG00000144867;ENSG00000187514;ENSG00000109606;ENSG00000176890…	319 (398)	3.63e-05	0.00203	0		0 (0)	1	1	3.63e-05	0.00203
804	Zinc	ZnO NP-NM110 06h	Down	Transport of Mature mRNAs Derived from Intronless Transcripts	Reactome	21	ENSG00000111581;ENSG00000120253;ENSG00000047410;ENSG00000132182;ENSG00000136709;ENSG00000075188;ENSG00000136937;ENSG00000153201;ENSG00000069248;ENSG00000151247;ENSG00000160917;ENSG00000213024;ENSG00000094914;ENSG00000095319;ENSG00000102900;ENSG00000163002;ENSG00000058804;ENSG00000030066;ENSG00000155561;ENSG00000125450;ENSG00000165934	41 (44)	3.95e-05	0.00219	0		0 (0)	1	1	3.95e-05	0.00219
805	Zinc	ZnO NP-NM110 06h	Down	Anchoring of the basal body to the plasma membrane	Reactome	39	ENSG00000175216;ENSG00000119977;ENSG00000104833;ENSG00000188229;ENSG00000092036;ENSG00000103494;ENSG00000127914;ENSG00000116127;ENSG00000148019;ENSG00000072864;ENSG00000213397;ENSG00000126001;ENSG00000048342;ENSG00000007168;ENSG00000249115;ENSG00000196230;ENSG00000072062;ENSG00000114107;ENSG00000005249;ENSG00000136861;ENSG00000141577;ENSG00000101639;ENSG00000101624;ENSG00000117650;ENSG00000139350…	97 (100)	4.15e-05	0.00227	0		0 (2)	1	1	4.15e-05	0.00227
806	Zinc	ZnO NP-NM110 06h	Down	PLK1 signaling events	PID	22	ENSG00000112984;ENSG00000161888;ENSG00000134318;ENSG00000087586;ENSG00000113575;ENSG00000105325;ENSG00000112029;ENSG00000149503;ENSG00000186871;ENSG00000138778;ENSG00000198901;ENSG00000156970;ENSG00000088325;ENSG00000080986;ENSG00000068796;ENSG00000117399;ENSG00000101224;ENSG00000166851;ENSG00000101972;ENSG00000131462;ENSG00000092853;ENSG00000134057	44 (44)	4.2e-05	0.00227	0		0 (1)	1	1	4.2e-05	0.00227
807	Zinc	ZnO NP-NM110 06h	Down	Gene Expression	Reactome	422	ENSG00000136463;ENSG00000172336;ENSG00000133226;ENSG00000160113;ENSG00000141736;ENSG00000149480;ENSG00000136492;ENSG00000163161;ENSG00000125450;ENSG00000163902;ENSG00000136709;ENSG00000124486;ENSG00000278619;ENSG00000099995;ENSG00000160710;ENSG00000116874;ENSG00000133895;ENSG00000108953;ENSG00000037897;ENSG00000143799;ENSG00000179115;ENSG00000183751;ENSG00000164053;ENSG00000115368;ENSG00000124608…	1589 (1755)	2.11e-06	0.000271	2	HMDB00161;HMDB00125	27 (149)	0.848	1	2.54e-05	0.00238
808	Zinc	ZnO NP-NM110 06h	Down	G2/M Transition	Reactome	53	ENSG00000111206;ENSG00000108953;ENSG00000087586;ENSG00000114107;ENSG00000113575;ENSG00000104833;ENSG00000117650;ENSG00000092036;ENSG00000088325;ENSG00000127914;ENSG00000116127;ENSG00000148019;ENSG00000072864;ENSG00000037042;ENSG00000162521;ENSG00000249115;ENSG00000157456;ENSG00000213397;ENSG00000126001;ENSG00000075218;ENSG00000117724;ENSG00000126216;ENSG00000196230;ENSG00000072062;ENSG00000175216…	132 (136)	1.96e-06	0.000265	0		1 (5)	1	1	2.78e-05	0.00238
809	Zinc	ZnO NP-NM110 06h	Down	Rev-mediated nuclear export of HIV RNA	Reactome	20	ENSG00000111581;ENSG00000120253;ENSG00000075188;ENSG00000069248;ENSG00000047410;ENSG00000132182;ENSG00000132341;ENSG00000099901;ENSG00000030066;ENSG00000180198;ENSG00000213024;ENSG00000094914;ENSG00000095319;ENSG00000102900;ENSG00000163002;ENSG00000058804;ENSG00000153201;ENSG00000082898;ENSG00000155561;ENSG00000125450	33 (33)	1.96e-06	0.000265	0		1 (3)	1	1	2.78e-05	0.00238
810	Zinc	ZnO NP-NM110 06h	Down	Signaling events mediated by HDAC Class I	PID	25	ENSG00000149480;ENSG00000141027;ENSG00000132341;ENSG00000153201;ENSG00000114166;ENSG00000162521;ENSG00000102054;ENSG00000100462;ENSG00000132182;ENSG00000072062;ENSG00000213024;ENSG00000170004;ENSG00000111642;ENSG00000198952;ENSG00000169375;ENSG00000082898;ENSG00000067182;ENSG00000100811;ENSG00000005339;ENSG00000116455;ENSG00000135457;ENSG00000100393;ENSG00000164105;ENSG00000116478;ENSG00000196591	53 (58)	4.52e-05	0.00241	0		0 (1)	1	1	4.52e-05	0.00241
811	Zinc	ZnO NP-NM110 06h	Down	Transport of the SLBP independent Mature mRNA	Reactome	18	ENSG00000111581;ENSG00000120253;ENSG00000047410;ENSG00000132182;ENSG00000075188;ENSG00000136937;ENSG00000030066;ENSG00000069248;ENSG00000151247;ENSG00000213024;ENSG00000094914;ENSG00000095319;ENSG00000102900;ENSG00000163002;ENSG00000058804;ENSG00000153201;ENSG00000155561;ENSG00000125450	33 (33)	4.75e-05	0.0025	0		0 (0)	1	1	4.75e-05	0.0025
812	Zinc	ZnO NP-NM110 06h	Down	Loss of Nlp from mitotic centrosomes	Reactome	30	ENSG00000213397;ENSG00000104833;ENSG00000188229;ENSG00000092036;ENSG00000127914;ENSG00000116127;ENSG00000148019;ENSG00000072864;ENSG00000126001;ENSG00000007168;ENSG00000249115;ENSG00000196230;ENSG00000072062;ENSG00000175216;ENSG00000005249;ENSG00000136861;ENSG00000141577;ENSG00000101639;ENSG00000101624;ENSG00000117650;ENSG00000139350;ENSG00000166851;ENSG00000166037;ENSG00000137814;ENSG00000204843…	69 (72)	5.67e-05	0.00282	0		0 (2)	1	1	5.67e-05	0.00282
813	Zinc	ZnO NP-NM110 06h	Down	Loss of proteins required for interphase microtubule organization from the centrosome	Reactome	30	ENSG00000213397;ENSG00000104833;ENSG00000188229;ENSG00000092036;ENSG00000127914;ENSG00000116127;ENSG00000148019;ENSG00000072864;ENSG00000126001;ENSG00000007168;ENSG00000249115;ENSG00000196230;ENSG00000072062;ENSG00000175216;ENSG00000005249;ENSG00000136861;ENSG00000141577;ENSG00000101639;ENSG00000101624;ENSG00000117650;ENSG00000139350;ENSG00000166851;ENSG00000166037;ENSG00000137814;ENSG00000204843…	69 (72)	5.67e-05	0.00282	0		0 (2)	1	1	5.67e-05	0.00282
814	Zinc	ZnO NP-NM110 06h	Down	miR-targeted genes in lymphocytes - TarBase	Wikipathways	121	ENSG00000136436;ENSG00000111276;ENSG00000138061;ENSG00000178202;ENSG00000172572;ENSG00000188529;ENSG00000111530;ENSG00000141429;ENSG00000085224;ENSG00000065911;ENSG00000278619;ENSG00000072501;ENSG00000134575;ENSG00000135535;ENSG00000122643;ENSG00000117713;ENSG00000153922;ENSG00000110092;ENSG00000151247;ENSG00000004399;ENSG00000102158;ENSG00000109586;ENSG00000160710;ENSG00000071539;ENSG00000144867…	399 (486)	5.68e-05	0.00282	0		0 (0)	1	1	5.68e-05	0.00282
815	Zinc	ZnO NP-NM110 06h	Down	Removal of licensing factors from origins	Reactome	16	ENSG00000111276;ENSG00000085840;ENSG00000112312;ENSG00000164815;ENSG00000135336;ENSG00000112118;ENSG00000104738;ENSG00000100297;ENSG00000105325;ENSG00000073111;ENSG00000167513;ENSG00000123374;ENSG00000145386;ENSG00000076003;ENSG00000065328;ENSG00000094804	28 (28)	5.9e-05	0.00286	0		0 (2)	1	1	5.9e-05	0.00286
816	Zinc	ZnO NP-NM110 06h	Down	Regulation of DNA replication	Reactome	16	ENSG00000111276;ENSG00000085840;ENSG00000112312;ENSG00000164815;ENSG00000135336;ENSG00000112118;ENSG00000104738;ENSG00000100297;ENSG00000105325;ENSG00000073111;ENSG00000167513;ENSG00000123374;ENSG00000145386;ENSG00000076003;ENSG00000065328;ENSG00000094804	28 (28)	5.9e-05	0.00286	0		0 (2)	1	1	5.9e-05	0.00286
817	Zinc	ZnO NP-NM110 06h	Down	cdk regulation of dna replication	BioCarta	12	ENSG00000111276;ENSG00000085840;ENSG00000164815;ENSG00000073111;ENSG00000112118;ENSG00000104738;ENSG00000100297;ENSG00000076003;ENSG00000135336;ENSG00000167513;ENSG00000123374;ENSG00000094804	18 (18)	6.3e-05	0.00296	0		0 (0)	1	1	6.3e-05	0.00296
818	Zinc	ZnO NP-NM110 06h	Down	Nuclear Pore Complex (NPC) Disassembly	Reactome	18	ENSG00000153201;ENSG00000111581;ENSG00000120253;ENSG00000047410;ENSG00000132182;ENSG00000157456;ENSG00000075188;ENSG00000030066;ENSG00000069248;ENSG00000213024;ENSG00000094914;ENSG00000095319;ENSG00000102900;ENSG00000163002;ENSG00000058804;ENSG00000134057;ENSG00000155561;ENSG00000125450	34 (34)	8.02e-05	0.00368	0		0 (2)	1	1	8.02e-05	0.00368
819	Zinc	ZnO NP-NM110 06h	Down	Transport of the SLBP Dependant Mature mRNA	Reactome	18	ENSG00000111581;ENSG00000120253;ENSG00000047410;ENSG00000132182;ENSG00000075188;ENSG00000136937;ENSG00000030066;ENSG00000069248;ENSG00000151247;ENSG00000213024;ENSG00000094914;ENSG00000095319;ENSG00000102900;ENSG00000163002;ENSG00000058804;ENSG00000153201;ENSG00000155561;ENSG00000125450	34 (34)	8.02e-05	0.00368	0		0 (0)	1	1	8.02e-05	0.00368
820	Zinc	ZnO NP-NM110 06h	Down	Mitotic G2-G2/M phases	Reactome	53	ENSG00000111206;ENSG00000108953;ENSG00000087586;ENSG00000114107;ENSG00000113575;ENSG00000104833;ENSG00000117650;ENSG00000092036;ENSG00000088325;ENSG00000127914;ENSG00000116127;ENSG00000148019;ENSG00000072864;ENSG00000037042;ENSG00000162521;ENSG00000249115;ENSG00000157456;ENSG00000213397;ENSG00000126001;ENSG00000075218;ENSG00000117724;ENSG00000126216;ENSG00000196230;ENSG00000072062;ENSG00000175216…	134 (138)	3.35e-06	0.000372	0		1 (5)	1	1	4.56e-05	0.00372
821	Zinc	ZnO NP-NM110 06h	Down	DNA Repair	Reactome	100	ENSG00000136492;ENSG00000163161;ENSG00000156587;ENSG00000175054;ENSG00000148229;ENSG00000101442;ENSG00000075131;ENSG00000138376;ENSG00000104320;ENSG00000149554;ENSG00000166200;ENSG00000091542;ENSG00000134574;ENSG00000153147;ENSG00000197299;ENSG00000112039;ENSG00000178966;ENSG00000181544;ENSG00000183161;ENSG00000221829;ENSG00000143799;ENSG00000164053;ENSG00000012048;ENSG00000131788;ENSG00000113456…	300 (323)	3.5e-06	0.000378	0		6 (48)	1	1	4.75e-05	0.00372
822	Zinc	ZnO NP-NM110 06h	Down	tRNA processing in the nucleus	Reactome	28	ENSG00000178718;ENSG00000047410;ENSG00000172336;ENSG00000132341;ENSG00000153201;ENSG00000160917;ENSG00000094914;ENSG00000072756;ENSG00000058804;ENSG00000125450;ENSG00000111581;ENSG00000075188;ENSG00000132182;ENSG00000069248;ENSG00000120253;ENSG00000213024;ENSG00000182173;ENSG00000095319;ENSG00000102900;ENSG00000171262;ENSG00000135974;ENSG00000154743;ENSG00000030066;ENSG00000006744;ENSG00000079785…	56 (59)	3.87e-06	0.000408	0		2 (10)	1	1	5.21e-05	0.00379
823	Zinc	ZnO NP-NM110 06h	Down	Squalene and cholesterol biosynthesis	EHMN	20	ENSG00000104549;ENSG00000111581;ENSG00000052802;ENSG00000110921;ENSG00000132182;ENSG00000095319;ENSG00000075188;ENSG00000079459;ENSG00000030066;ENSG00000069248;ENSG00000120253;ENSG00000113161;ENSG00000147383;ENSG00000148377;ENSG00000163002;ENSG00000102900;ENSG00000213024;ENSG00000153201;ENSG00000155561;ENSG00000125450	36 (37)	1.25e-05	0.000947	1	HMDB01090	3 (42)	0.312	1	5.24e-05	0.00379
824	Zinc	ZnO NP-NM110 06h	Down	Transport of Mature Transcript to Cytoplasm	Reactome	36	ENSG00000047410;ENSG00000133226;ENSG00000153201;ENSG00000160917;ENSG00000094914;ENSG00000136450;ENSG00000100227;ENSG00000058804;ENSG00000125450;ENSG00000124193;ENSG00000115875;ENSG00000111581;ENSG00000161547;ENSG00000141543;ENSG00000136709;ENSG00000075188;ENSG00000116350;ENSG00000151247;ENSG00000132182;ENSG00000108349;ENSG00000069248;ENSG00000120253;ENSG00000111196;ENSG00000063244;ENSG00000136937…	80 (88)	4.06e-06	0.000418	0		1 (4)	1	1	5.45e-05	0.0038
825	Zinc	ZnO NP-NM110 06h	Down	Kinesins	Reactome	19	ENSG00000112984;ENSG00000163808;ENSG00000136883;ENSG00000138778;ENSG00000161800;ENSG00000090889;ENSG00000121621;ENSG00000131437;ENSG00000138182;ENSG00000054523;ENSG00000068796;ENSG00000137807;ENSG00000170759;ENSG00000138160;ENSG00000237649;ENSG00000079616;ENSG00000142945;ENSG00000186185;ENSG00000139116	37 (43)	8.78e-05	0.00399	0		0 (0)	1	1	8.78e-05	0.00399
826	Zinc	ZnO NP-NM110 06h	Down	Interactions of Rev with host cellular proteins	Reactome	21	ENSG00000153201;ENSG00000111581;ENSG00000120253;ENSG00000075188;ENSG00000069248;ENSG00000047410;ENSG00000132182;ENSG00000132341;ENSG00000099901;ENSG00000108424;ENSG00000180198;ENSG00000213024;ENSG00000094914;ENSG00000095319;ENSG00000102900;ENSG00000163002;ENSG00000058804;ENSG00000030066;ENSG00000082898;ENSG00000155561;ENSG00000125450	37 (37)	4.78e-06	0.00048	0		1 (3)	1	1	6.33e-05	0.00422
827	Zinc	ZnO NP-NM110 06h	Down	Regulation of TP53 Activity through Phosphorylation	Reactome	39	ENSG00000197299;ENSG00000087586;ENSG00000178966;ENSG00000165632;ENSG00000136492;ENSG00000112062;ENSG00000174371;ENSG00000172977;ENSG00000164053;ENSG00000187325;ENSG00000175054;ENSG00000074590;ENSG00000101773;ENSG00000149136;ENSG00000101266;ENSG00000113456;ENSG00000132356;ENSG00000175643;ENSG00000092201;ENSG00000141510;ENSG00000012048;ENSG00000138376;ENSG00000104320;ENSG00000149554;ENSG00000130699…	90 (94)	5.09e-06	0.000499	0		1 (3)	1	1	6.71e-05	0.00422
828	Zinc	ZnO NP-NM110 06h	Down	Chromatin modifying enzymes	Reactome	82	ENSG00000170854;ENSG00000142453;ENSG00000140396;ENSG00000096968;ENSG00000101945;ENSG00000141027;ENSG00000143379;ENSG00000276234;ENSG00000181555;ENSG00000077684;ENSG00000114166;ENSG00000149480;ENSG00000129691;ENSG00000074266;ENSG00000152382;ENSG00000182979;ENSG00000127337;ENSG00000118058;ENSG00000172977;ENSG00000272333;ENSG00000175792;ENSG00000057935;ENSG00000102221;ENSG00000162521;ENSG00000117222…	237 (274)	5.41e-06	0.000503	0		4 (16)	1	1	7.1e-05	0.00422
829	Zinc	ZnO NP-NM110 06h	Down	Chromatin organization	Reactome	82	ENSG00000170854;ENSG00000142453;ENSG00000140396;ENSG00000096968;ENSG00000101945;ENSG00000141027;ENSG00000143379;ENSG00000276234;ENSG00000181555;ENSG00000077684;ENSG00000114166;ENSG00000149480;ENSG00000129691;ENSG00000074266;ENSG00000152382;ENSG00000182979;ENSG00000127337;ENSG00000118058;ENSG00000172977;ENSG00000272333;ENSG00000175792;ENSG00000057935;ENSG00000102221;ENSG00000162521;ENSG00000117222…	237 (274)	5.41e-06	0.000503	0		4 (16)	1	1	7.1e-05	0.00422
830	Zinc	ZnO NP-NM110 06h	Down	DNA strand elongation	Reactome	19	ENSG00000111445;ENSG00000138346;ENSG00000035928;ENSG00000132383;ENSG00000117748;ENSG00000147536;ENSG00000105486;ENSG00000073111;ENSG00000112118;ENSG00000104738;ENSG00000100297;ENSG00000076003;ENSG00000101003;ENSG00000181938;ENSG00000132646;ENSG00000077514;ENSG00000168496;ENSG00000131153;ENSG00000133119	32 (32)	5.48e-06	0.000503	0		1 (6)	1	1	7.18e-05	0.00422
831	Zinc	ZnO NP-NM110 06h	Down	Interactions of Vpr with host cellular proteins	Reactome	18	ENSG00000164985;ENSG00000111581;ENSG00000120253;ENSG00000047410;ENSG00000132182;ENSG00000075188;ENSG00000030066;ENSG00000069248;ENSG00000213024;ENSG00000094914;ENSG00000095319;ENSG00000102900;ENSG00000163002;ENSG00000058804;ENSG00000153201;ENSG00000114030;ENSG00000155561;ENSG00000125450	35 (35)	0.000131	0.00567	0		0 (0)	1	1	0.000131	0.00567
832	Zinc	ZnO NP-NM110 06h	Down	Regulation of APC/C activators between G1/S and early anaphase	Reactome	18	ENSG00000154473;ENSG00000153107;ENSG00000166851;ENSG00000004897;ENSG00000112029;ENSG00000089053;ENSG00000196510;ENSG00000145386;ENSG00000105325;ENSG00000130177;ENSG00000123374;ENSG00000094880;ENSG00000053900;ENSG00000176248;ENSG00000134057;ENSG00000170142;ENSG00000156970;ENSG00000117399	35 (36)	0.000131	0.00567	0		0 (2)	1	1	0.000131	0.00567
833	Zinc	ZnO NP-NM110 06h	Down	NEP/NS2 Interacts with the Cellular Export Machinery	Reactome	18	ENSG00000111581;ENSG00000120253;ENSG00000047410;ENSG00000132182;ENSG00000132341;ENSG00000075188;ENSG00000030066;ENSG00000069248;ENSG00000213024;ENSG00000094914;ENSG00000095319;ENSG00000102900;ENSG00000163002;ENSG00000058804;ENSG00000153201;ENSG00000082898;ENSG00000155561;ENSG00000125450	30 (30)	7.91e-06	0.00067	0		1 (3)	1	1	0.000101	0.00574
834	Zinc	ZnO NP-NM110 06h	Down	Unwinding of DNA	Reactome	9	ENSG00000073111;ENSG00000147536;ENSG00000131153;ENSG00000112118;ENSG00000104738;ENSG00000100297;ENSG00000101003;ENSG00000181938;ENSG00000076003	12 (12)	0.00014	0.00588	0		0 (0)	1	1	0.00014	0.00588
835	Zinc	ZnO NP-NM110 06h	Down	Transcriptional Regulation by TP53	Reactome	113	ENSG00000136807;ENSG00000111276;ENSG00000203667;ENSG00000149480;ENSG00000136492;ENSG00000163161;ENSG00000136463;ENSG00000175054;ENSG00000169372;ENSG00000168556;ENSG00000167258;ENSG00000138376;ENSG00000087088;ENSG00000104320;ENSG00000170004;ENSG00000111642;ENSG00000149554;ENSG00000149136;ENSG00000134574;ENSG00000080546;ENSG00000122512;ENSG00000092201;ENSG00000155508;ENSG00000197299;ENSG00000108953…	358 (376)	1.47e-05	0.00103	1	HMDB00125	7 (37)	0.583	1	0.000109	0.00602
836	Zinc	ZnO NP-NM110 06h	Down	DNA Damage Response	Wikipathways	28	ENSG00000112576;ENSG00000111276;ENSG00000253729;ENSG00000198586;ENSG00000146872;ENSG00000164053;ENSG00000012048;ENSG00000175054;ENSG00000157456;ENSG00000175305;ENSG00000113456;ENSG00000072501;ENSG00000120868;ENSG00000087088;ENSG00000188486;ENSG00000064012;ENSG00000104320;ENSG00000110092;ENSG00000149554;ENSG00000035928;ENSG00000135446;ENSG00000117748;ENSG00000134574;ENSG00000080546;ENSG00000141510…	66 (68)	0.000166	0.00677	0		0 (2)	1	1	0.000166	0.00677
837	Zinc	ZnO NP-NM110 06h	Down	Mismatch repair - Homo sapiens (human)	KEGG	13	ENSG00000111445;ENSG00000174371;ENSG00000132383;ENSG00000117748;ENSG00000105486;ENSG00000116062;ENSG00000122512;ENSG00000095002;ENSG00000113318;ENSG00000132646;ENSG00000077514;ENSG00000035928;ENSG00000133119	22 (23)	0.000187	0.00754	0		0 (0)	1	1	0.000187	0.00754
838	Zinc	ZnO NP-NM110 06h	Down	tRNA processing	Reactome	41	ENSG00000178718;ENSG00000047410;ENSG00000167264;ENSG00000037897;ENSG00000132341;ENSG00000153201;ENSG00000160917;ENSG00000094914;ENSG00000072756;ENSG00000058804;ENSG00000125450;ENSG00000183665;ENSG00000111581;ENSG00000162971;ENSG00000075188;ENSG00000172336;ENSG00000132182;ENSG00000091127;ENSG00000069248;ENSG00000120253;ENSG00000066651;ENSG00000151576;ENSG00000135974;ENSG00000122435;ENSG00000213024…	99 (102)	1.14e-05	0.000898	0		7 (51)	1	1	0.000142	0.00761
839	Zinc	ZnO NP-NM110 06h	Down	Regulation of Glucokinase by Glucokinase Regulatory Protein	Reactome	16	ENSG00000111581;ENSG00000120253;ENSG00000047410;ENSG00000132182;ENSG00000075188;ENSG00000030066;ENSG00000069248;ENSG00000213024;ENSG00000094914;ENSG00000095319;ENSG00000102900;ENSG00000163002;ENSG00000058804;ENSG00000153201;ENSG00000155561;ENSG00000125450	29 (30)	0.000105	0.00466	1	HMDB03345	1 (4)	0.117	1	0.00015	0.00786
840	Zinc	ZnO NP-NM110 06h	Down	Transport of Mature mRNA derived from an Intron-Containing Transcript	Reactome	32	ENSG00000047410;ENSG00000108349;ENSG00000153201;ENSG00000094914;ENSG00000136450;ENSG00000100227;ENSG00000116350;ENSG00000125450;ENSG00000124193;ENSG00000115875;ENSG00000111581;ENSG00000161547;ENSG00000075188;ENSG00000141543;ENSG00000132182;ENSG00000133226;ENSG00000069248;ENSG00000120253;ENSG00000111196;ENSG00000063244;ENSG00000136937;ENSG00000265241;ENSG00000213024;ENSG00000125351;ENSG00000095319…	71 (76)	1.33e-05	0.000987	0		1 (4)	1	1	0.000162	0.00824
841	Zinc	ZnO NP-NM110 06h	Down	miRNA Regulation of DNA Damage Response	Wikipathways	29	ENSG00000112576;ENSG00000111276;ENSG00000113328;ENSG00000149554;ENSG00000198586;ENSG00000146872;ENSG00000164053;ENSG00000012048;ENSG00000175054;ENSG00000157456;ENSG00000175305;ENSG00000113456;ENSG00000072501;ENSG00000120868;ENSG00000087088;ENSG00000188486;ENSG00000064012;ENSG00000104320;ENSG00000110092;ENSG00000253729;ENSG00000035928;ENSG00000134057;ENSG00000117748;ENSG00000134574;ENSG00000080546…	70 (89)	0.000211	0.00836	0		0 (2)	1	1	0.000211	0.00836
842	Zinc	ZnO NP-NM110 06h	Down	Activation of the pre-replicative complex	Reactome	18	ENSG00000073111;ENSG00000085840;ENSG00000117748;ENSG00000164815;ENSG00000135336;ENSG00000112118;ENSG00000104738;ENSG00000006634;ENSG00000076003;ENSG00000100479;ENSG00000167513;ENSG00000100297;ENSG00000123374;ENSG00000148229;ENSG00000065328;ENSG00000097046;ENSG00000094804;ENSG00000132383	31 (32)	1.5e-05	0.00103	0		1 (3)	1	1	0.000181	0.00874
843	Zinc	ZnO NP-NM110 06h	Down	Export of Viral Ribonucleoproteins from Nucleus	Reactome	18	ENSG00000111581;ENSG00000120253;ENSG00000047410;ENSG00000132182;ENSG00000132341;ENSG00000075188;ENSG00000030066;ENSG00000069248;ENSG00000213024;ENSG00000094914;ENSG00000095319;ENSG00000102900;ENSG00000163002;ENSG00000058804;ENSG00000153201;ENSG00000082898;ENSG00000155561;ENSG00000125450	31 (31)	1.5e-05	0.00103	0		1 (3)	1	1	0.000181	0.00874
844	Zinc	ZnO NP-NM110 06h	Down	Vitamin D3 (cholecalciferol) metabolism	EHMN	14	ENSG00000111581;ENSG00000120253;ENSG00000132182;ENSG00000019186;ENSG00000075188;ENSG00000030066;ENSG00000069248;ENSG00000213024;ENSG00000095319;ENSG00000102900;ENSG00000163002;ENSG00000153201;ENSG00000155561;ENSG00000125450	25 (27)	0.000231	0.00898	0		0 (12)	1	1	0.000231	0.00898
845	Zinc	ZnO NP-NM110 06h	Down	mRNA Splicing - Major Pathway	Reactome	59	ENSG00000109606;ENSG00000181222;ENSG00000171566;ENSG00000133226;ENSG00000116350;ENSG00000060688;ENSG00000084463;ENSG00000160917;ENSG00000188529;ENSG00000145833;ENSG00000136450;ENSG00000161547;ENSG00000189091;ENSG00000101138;ENSG00000115875;ENSG00000087365;ENSG00000136527;ENSG00000085872;ENSG00000136875;ENSG00000105323;ENSG00000100836;ENSG00000167005;ENSG00000141543;ENSG00000063244;ENSG00000099995…	175 (185)	0.000242	0.00934	0		0 (0)	1	1	0.000242	0.00934
846	Zinc	ZnO NP-NM110 06h	Down	the prc2 complex sets long-term gene silencing through modification of histone tails	BioCarta	10	ENSG00000168283;ENSG00000102054;ENSG00000162521;ENSG00000100811;ENSG00000074266;ENSG00000141582;ENSG00000178691;ENSG00000116478;ENSG00000196591;ENSG00000269897	15 (18)	0.000269	0.0099	0		0 (0)	1	1	0.000269	0.0099
847	Zinc	ZnO NP-NM110 06h	Down	mRNA Splicing	Reactome	61	ENSG00000109606;ENSG00000181222;ENSG00000161981;ENSG00000171566;ENSG00000133226;ENSG00000116350;ENSG00000060688;ENSG00000084463;ENSG00000160917;ENSG00000188529;ENSG00000145833;ENSG00000136450;ENSG00000141543;ENSG00000189091;ENSG00000101138;ENSG00000115875;ENSG00000087365;ENSG00000136527;ENSG00000161547;ENSG00000136875;ENSG00000105323;ENSG00000100836;ENSG00000167005;ENSG00000185946;ENSG00000063244…	183 (193)	0.000272	0.0099	0		0 (0)	1	1	0.000272	0.0099
848	Zinc	ZnO NP-NM110 06h	Down	Validated nuclear estrogen receptor alpha network	PID	25	ENSG00000140396;ENSG00000141027;ENSG00000182871;ENSG00000119335;ENSG00000167972;ENSG00000182979;ENSG00000100201;ENSG00000012048;ENSG00000111912;ENSG00000140350;ENSG00000123064;ENSG00000215021;ENSG00000100219;ENSG00000084676;ENSG00000147654;ENSG00000144744;ENSG00000152192;ENSG00000110092;ENSG00000168646;ENSG00000125686;ENSG00000143013;ENSG00000213186;ENSG00000100393;ENSG00000132646;ENSG00000116478	58 (65)	0.000272	0.0099	0		0 (1)	1	1	0.000272	0.0099
849	Zinc	ZnO NP-NM110 06h	Down	Inhibition of the proteolytic activity of APC/C required for the onset of anaphase by mitotic spindle checkpoint components	Reactome	12	ENSG00000154473;ENSG00000004897;ENSG00000089053;ENSG00000153107;ENSG00000156970;ENSG00000130177;ENSG00000094880;ENSG00000053900;ENSG00000176248;ENSG00000170142;ENSG00000196510;ENSG00000117399	20 (21)	0.000273	0.0099	0		0 (0)	1	1	0.000273	0.0099
850	Zinc	ZnO NP-NM110 06h	Down	Inactivation of APC/C via direct inhibition of the APC/C complex	Reactome	12	ENSG00000154473;ENSG00000004897;ENSG00000089053;ENSG00000153107;ENSG00000156970;ENSG00000130177;ENSG00000094880;ENSG00000053900;ENSG00000176248;ENSG00000170142;ENSG00000196510;ENSG00000117399	20 (21)	0.000273	0.0099	0		0 (0)	1	1	0.000273	0.0099
851	Zinc	ZnO NP-NM110 06h	Down	Activation of APC/C and APC/C:Cdc20 mediated degradation of mitotic proteins	Reactome	16	ENSG00000154473;ENSG00000166851;ENSG00000004897;ENSG00000089053;ENSG00000196510;ENSG00000145386;ENSG00000117650;ENSG00000130177;ENSG00000153107;ENSG00000094880;ENSG00000053900;ENSG00000176248;ENSG00000134057;ENSG00000170142;ENSG00000156970;ENSG00000117399	31 (32)	0.000294	0.0106	0		0 (0)	1	1	0.000294	0.0106
852	Zinc	ZnO NP-NM110 06h	Down	SUMOylation of DNA replication proteins	Reactome	18	ENSG00000111581;ENSG00000120253;ENSG00000047410;ENSG00000132182;ENSG00000132646;ENSG00000075188;ENSG00000030066;ENSG00000069248;ENSG00000131747;ENSG00000213024;ENSG00000094914;ENSG00000095319;ENSG00000102900;ENSG00000163002;ENSG00000058804;ENSG00000153201;ENSG00000155561;ENSG00000125450	37 (38)	0.000323	0.0113	0		0 (0)	1	1	0.000323	0.0113
853	Zinc	ZnO NP-NM110 06h	Down	Resolution of Abasic Sites (AP sites)	Reactome	20	ENSG00000111445;ENSG00000129071;ENSG00000073050;ENSG00000132383;ENSG00000117748;ENSG00000100823;ENSG00000105486;ENSG00000005156;ENSG00000076248;ENSG00000035928;ENSG00000065057;ENSG00000100479;ENSG00000143799;ENSG00000129484;ENSG00000132646;ENSG00000227345;ENSG00000077514;ENSG00000148229;ENSG00000168496;ENSG00000133119	37 (37)	2.16e-05	0.00137	0		2 (8)	1	1	0.000253	0.0116
854	Zinc	ZnO NP-NM110 06h	Down	Base Excision Repair	Reactome	20	ENSG00000111445;ENSG00000129071;ENSG00000073050;ENSG00000132383;ENSG00000117748;ENSG00000100823;ENSG00000105486;ENSG00000005156;ENSG00000076248;ENSG00000035928;ENSG00000065057;ENSG00000100479;ENSG00000143799;ENSG00000129484;ENSG00000132646;ENSG00000227345;ENSG00000077514;ENSG00000148229;ENSG00000168496;ENSG00000133119	37 (37)	2.16e-05	0.00137	0		2 (22)	1	1	0.000253	0.0116
855	Zinc	ZnO NP-NM110 06h	Down	Resolution of AP sites via the multiple-nucleotide patch replacement pathway	Reactome	15	ENSG00000111445;ENSG00000132383;ENSG00000117748;ENSG00000100823;ENSG00000105486;ENSG00000143799;ENSG00000035928;ENSG00000100479;ENSG00000129484;ENSG00000132646;ENSG00000227345;ENSG00000077514;ENSG00000148229;ENSG00000168496;ENSG00000133119	24 (24)	2.32e-05	0.00145	0		1 (6)	1	1	0.00027	0.0121
856	Zinc	ZnO NP-NM110 06h	Down	Synthesis of bile acids and bile salts via 7alpha-hydroxycholesterol	Reactome	12	ENSG00000242110;ENSG00000140396;ENSG00000196139;ENSG00000116171;ENSG00000084676;ENSG00000187134;ENSG00000151632;ENSG00000186350;ENSG00000168306;ENSG00000140284;ENSG00000136881;ENSG00000133835	18 (24)	6.3e-05	0.00296	1	HMDB00251	4 (51)	0.392	1	0.000287	0.0126
857	Zinc	ZnO NP-NM110 06h	Down	miR-targeted genes in epithelium - TarBase	Wikipathways	81	ENSG00000136436;ENSG00000176890;ENSG00000111276;ENSG00000009307;ENSG00000133703;ENSG00000109606;ENSG00000163513;ENSG00000138061;ENSG00000185340;ENSG00000112062;ENSG00000135069;ENSG00000065911;ENSG00000178202;ENSG00000149485;ENSG00000006652;ENSG00000119383;ENSG00000185722;ENSG00000037965;ENSG00000143878;ENSG00000113328;ENSG00000163430;ENSG00000113643;ENSG00000064651;ENSG00000109113;ENSG00000011485…	260 (330)	0.000371	0.0126	0		0 (0)	1	1	0.000371	0.0126
858	Zinc	ZnO NP-NM110 06h	Down	Orc1 removal from chromatin	Reactome	14	ENSG00000111276;ENSG00000085840;ENSG00000164815;ENSG00000135336;ENSG00000112118;ENSG00000104738;ENSG00000100297;ENSG00000105325;ENSG00000073111;ENSG00000167513;ENSG00000123374;ENSG00000145386;ENSG00000076003;ENSG00000094804	26 (26)	0.000399	0.0132	0		0 (2)	1	1	0.000399	0.0132
859	Zinc	ZnO NP-NM110 06h	Down	Switching of origins to a post-replicative state	Reactome	14	ENSG00000111276;ENSG00000085840;ENSG00000164815;ENSG00000135336;ENSG00000112118;ENSG00000104738;ENSG00000100297;ENSG00000105325;ENSG00000073111;ENSG00000167513;ENSG00000123374;ENSG00000145386;ENSG00000076003;ENSG00000094804	26 (26)	0.000399	0.0132	0		0 (2)	1	1	0.000399	0.0132
860	Zinc	ZnO NP-NM110 06h	Down	APC/C:Cdh1 mediated degradation of Cdc20 and other APC/C:Cdh1 targeted proteins in late mitosis/early G1	Reactome	14	ENSG00000166851;ENSG00000004897;ENSG00000087586;ENSG00000170142;ENSG00000196510;ENSG00000105325;ENSG00000130177;ENSG00000053900;ENSG00000094880;ENSG00000176248;ENSG00000089053;ENSG00000178999;ENSG00000153107;ENSG00000117399	26 (27)	0.000399	0.0132	0		0 (0)	1	1	0.000399	0.0132
861	Zinc	ZnO NP-NM110 06h	Down	Gastric Cancer Network 1	Wikipathways	14	ENSG00000163808;ENSG00000111581;ENSG00000134982;ENSG00000087586;ENSG00000160221;ENSG00000183814;ENSG00000117724;ENSG00000104738;ENSG00000138182;ENSG00000131747;ENSG00000101639;ENSG00000239521;ENSG00000088325;ENSG00000175792	26 (29)	0.000399	0.0132	0		0 (0)	1	1	0.000399	0.0132
862	Zinc	ZnO NP-NM110 06h	Down	Prostaglandin formation from dihomo gama-linoleic acid	EHMN	15	ENSG00000111581;ENSG00000120253;ENSG00000132182;ENSG00000069248;ENSG00000159228;ENSG00000075188;ENSG00000030066;ENSG00000164120;ENSG00000213024;ENSG00000095319;ENSG00000102900;ENSG00000163002;ENSG00000153201;ENSG00000155561;ENSG00000125450	29 (31)	0.00044	0.0144	0		0 (8)	1	1	0.00044	0.0144
863	Zinc	ZnO NP-NM110 06h	Down	DNA replication - Homo sapiens (human)	KEGG	17	ENSG00000111445;ENSG00000138346;ENSG00000132383;ENSG00000035928;ENSG00000105486;ENSG00000073111;ENSG00000112118;ENSG00000104738;ENSG00000100297;ENSG00000076003;ENSG00000100479;ENSG00000132646;ENSG00000117748;ENSG00000077514;ENSG00000148229;ENSG00000168496;ENSG00000133119	35 (36)	0.000483	0.0153	0		0 (0)	1	1	0.000483	0.0153
864	Zinc	ZnO NP-NM110 06h	Down	RHO GTPase Effectors	Reactome	86	ENSG00000111276;ENSG00000121621;ENSG00000140396;ENSG00000133026;ENSG00000125450;ENSG00000115163;ENSG00000149503;ENSG00000145241;ENSG00000186871;ENSG00000138778;ENSG00000117724;ENSG00000188747;ENSG00000152253;ENSG00000175216;ENSG00000167641;ENSG00000163539;ENSG00000143228;ENSG00000114993;ENSG00000150093;ENSG00000149636;ENSG00000133895;ENSG00000104863;ENSG00000180573;ENSG00000080986;ENSG00000075188…	262 (299)	3.2e-05	0.00182	0		3 (27)	1	1	0.000363	0.0155
865	Zinc	ZnO NP-NM110 06h	Down	Mitotic Spindle Checkpoint	Reactome	12	ENSG00000154473;ENSG00000004897;ENSG00000089053;ENSG00000196510;ENSG00000130177;ENSG00000153107;ENSG00000094880;ENSG00000053900;ENSG00000176248;ENSG00000170142;ENSG00000156970;ENSG00000117399	21 (22)	0.000509	0.0159	0		0 (0)	1	1	0.000509	0.0159
866	Zinc	ZnO NP-NM110 06h	Down	PCNA-Dependent Long Patch Base Excision Repair	Reactome	12	ENSG00000111445;ENSG00000132383;ENSG00000117748;ENSG00000100823;ENSG00000105486;ENSG00000168496;ENSG00000100479;ENSG00000132646;ENSG00000077514;ENSG00000148229;ENSG00000035928;ENSG00000133119	21 (21)	0.000509	0.0159	0		0 (2)	1	1	0.000509	0.0159
867	Zinc	ZnO NP-NM110 06h	Down	2_-deoxy-&alpha;-D-ribose 1-phosphate degradation	HumanCyc	5	ENSG00000108602;ENSG00000137124;ENSG00000169299;ENSG00000006534;ENSG00000023697	5 (6)	0.000524	0.0163	0		0 (8)	1	1	0.000524	0.0163
868	Zinc	ZnO NP-NM110 06h	Down	RNA transport - Homo sapiens (human)	KEGG	53	ENSG00000178718;ENSG00000106263;ENSG00000047410;ENSG00000172336;ENSG00000133226;ENSG00000095319;ENSG00000132341;ENSG00000153201;ENSG00000094914;ENSG00000072756;ENSG00000058804;ENSG00000141543;ENSG00000125450;ENSG00000111581;ENSG00000108424;ENSG00000092208;ENSG00000164967;ENSG00000075188;ENSG00000130741;ENSG00000100462;ENSG00000074201;ENSG00000132182;ENSG00000115211;ENSG00000070785;ENSG00000108349…	158 (171)	0.000562	0.0173	0		0 (3)	1	1	0.000562	0.0173
869	Zinc	ZnO NP-NM110 06h	Down	Mismatch repair	Wikipathways	7	ENSG00000174371;ENSG00000132383;ENSG00000105486;ENSG00000116062;ENSG00000095002;ENSG00000132646;ENSG00000035928	9 (9)	0.000598	0.0183	0		0 (0)	1	1	0.000598	0.0183
870	Zinc	ZnO NP-NM110 06h	Down	APC/C:Cdc20 mediated degradation of mitotic proteins	Reactome	15	ENSG00000154473;ENSG00000004897;ENSG00000089053;ENSG00000196510;ENSG00000145386;ENSG00000117650;ENSG00000130177;ENSG00000153107;ENSG00000094880;ENSG00000053900;ENSG00000176248;ENSG00000134057;ENSG00000170142;ENSG00000156970;ENSG00000117399	30 (31)	0.000702	0.0204	0		0 (0)	1	1	0.000702	0.0204
871	Zinc	ZnO NP-NM110 06h	Down	Phosphorylation of the APC/C	Reactome	11	ENSG00000166851;ENSG00000004897;ENSG00000089053;ENSG00000153107;ENSG00000130177;ENSG00000094880;ENSG00000053900;ENSG00000176248;ENSG00000134057;ENSG00000170142;ENSG00000196510	19 (20)	0.000756	0.0213	0		0 (0)	1	1	0.000756	0.0213
872	Zinc	ZnO NP-NM110 06h	Down	Conversion from APC/C:Cdc20 to APC/C:Cdh1 in late anaphase	Reactome	11	ENSG00000004897;ENSG00000089053;ENSG00000153107;ENSG00000105325;ENSG00000130177;ENSG00000094880;ENSG00000053900;ENSG00000176248;ENSG00000170142;ENSG00000196510;ENSG00000117399	19 (20)	0.000756	0.0213	0		0 (2)	1	1	0.000756	0.0213
873	Zinc	ZnO NP-NM110 06h	Down	G2/M DNA damage checkpoint	Reactome	31	ENSG00000197299;ENSG00000178966;ENSG00000136492;ENSG00000174371;ENSG00000172977;ENSG00000164053;ENSG00000012048;ENSG00000175054;ENSG00000101773;ENSG00000270882;ENSG00000113456;ENSG00000270276;ENSG00000175643;ENSG00000138376;ENSG00000188486;ENSG00000158373;ENSG00000104320;ENSG00000185515;ENSG00000149554;ENSG00000133119;ENSG00000111445;ENSG00000138346;ENSG00000132383;ENSG00000117748;ENSG00000108953…	82 (97)	0.000868	0.0237	0		0 (3)	1	1	0.000868	0.0237
874	Zinc	ZnO NP-NM110 06h	Down	DNA Replication Pre-Initiation	Reactome	19	ENSG00000073111;ENSG00000085840;ENSG00000117748;ENSG00000112312;ENSG00000164815;ENSG00000135336;ENSG00000112118;ENSG00000104738;ENSG00000006634;ENSG00000076003;ENSG00000100479;ENSG00000167513;ENSG00000100297;ENSG00000123374;ENSG00000148229;ENSG00000065328;ENSG00000097046;ENSG00000094804;ENSG00000132383	36 (37)	5.38e-05	0.00277	0		1 (3)	1	1	0.000583	0.0238
875	Zinc	ZnO NP-NM110 06h	Down	M/G1 Transition	Reactome	19	ENSG00000073111;ENSG00000085840;ENSG00000117748;ENSG00000112312;ENSG00000164815;ENSG00000135336;ENSG00000112118;ENSG00000104738;ENSG00000006634;ENSG00000076003;ENSG00000100479;ENSG00000167513;ENSG00000100297;ENSG00000123374;ENSG00000148229;ENSG00000065328;ENSG00000097046;ENSG00000094804;ENSG00000132383	36 (37)	5.38e-05	0.00277	0		1 (3)	1	1	0.000583	0.0238
876	Zinc	ZnO NP-NM110 06h	Down	Golgi-to-ER retrograde transport	Reactome	39	ENSG00000112984;ENSG00000185963;ENSG00000136240;ENSG00000121621;ENSG00000170759;ENSG00000115839;ENSG00000137807;ENSG00000107862;ENSG00000141429;ENSG00000143641;ENSG00000163808;ENSG00000181789;ENSG00000138778;ENSG00000073969;ENSG00000139116;ENSG00000090889;ENSG00000054523;ENSG00000007168;ENSG00000264364;ENSG00000136883;ENSG00000161800;ENSG00000116711;ENSG00000131437;ENSG00000184840;ENSG00000158623…	103 (111)	0.000192	0.0077	1	HMDB08031;HMDB07871;HMDB00564	3 (10)	0.312	1	0.000643	0.0257
877	Zinc	ZnO NP-NM110 06h	Down	Influenza Infection	Reactome	28	ENSG00000065150;ENSG00000047410;ENSG00000132341;ENSG00000153201;ENSG00000160917;ENSG00000094914;ENSG00000058804;ENSG00000125450;ENSG00000111581;ENSG00000100836;ENSG00000179218;ENSG00000075188;ENSG00000181222;ENSG00000047315;ENSG00000132182;ENSG00000069248;ENSG00000120253;ENSG00000213024;ENSG00000095319;ENSG00000102900;ENSG00000082898;ENSG00000030066;ENSG00000163002;ENSG00000102753;ENSG00000114030…	63 (63)	6.18e-05	0.00296	0		1 (10)	1	1	0.000661	0.0259
878	Zinc	ZnO NP-NM110 06h	Down	APC-Cdc20 mediated degradation of Nek2A	Reactome	13	ENSG00000154473;ENSG00000004897;ENSG00000089053;ENSG00000196510;ENSG00000117650;ENSG00000130177;ENSG00000153107;ENSG00000094880;ENSG00000053900;ENSG00000176248;ENSG00000170142;ENSG00000156970;ENSG00000117399	25 (26)	0.000995	0.0269	0		0 (0)	1	1	0.000995	0.0269
879	Zinc	ZnO NP-NM110 06h	Down	APC:Cdc20 mediated degradation of cell cycle proteins prior to satisfation of the cell cycle checkpoint	Reactome	14	ENSG00000154473;ENSG00000004897;ENSG00000089053;ENSG00000196510;ENSG00000145386;ENSG00000117650;ENSG00000130177;ENSG00000153107;ENSG00000094880;ENSG00000053900;ENSG00000176248;ENSG00000170142;ENSG00000156970;ENSG00000117399	28 (29)	0.00106	0.0283	0		0 (0)	1	1	0.00106	0.0283
880	Zinc	ZnO NP-NM110 06h	Down	Regulation of cholesterol biosynthesis by SREBP (SREBF)	Reactome	15	ENSG00000012174;ENSG00000072310;ENSG00000066136;ENSG00000132341;ENSG00000119927;ENSG00000099194;ENSG00000169710;ENSG00000113161;ENSG00000079459;ENSG00000110921;ENSG00000104549;ENSG00000114650;ENSG00000001630;ENSG00000108424;ENSG00000170522	31 (31)	0.00109	0.0288	0		0 (1)	1	1	0.00109	0.0288
881	Zinc	ZnO NP-NM110 06h	Down	mechanism of protein import into the nucleus	BioCarta	8	ENSG00000132341;ENSG00000099901;ENSG00000153201;ENSG00000180198;ENSG00000213024;ENSG00000132182;ENSG00000108424;ENSG00000182481	12 (12)	0.00117	0.0307	0		0 (2)	1	1	0.00117	0.0307
882	Zinc	ZnO NP-NM110 06h	Down	Wnt signaling network	PID	11	ENSG00000157240;ENSG00000164930;ENSG00000155760;ENSG00000177283;ENSG00000180340;ENSG00000070018;ENSG00000162337;ENSG00000163251;ENSG00000131650;ENSG00000107984;ENSG00000141753	20 (30)	0.00135	0.035	0		0 (0)	1	1	0.00135	0.035
883	Zinc	ZnO NP-NM110 06h	Down	Assembly of the pre-replicative complex	Reactome	11	ENSG00000135336;ENSG00000085840;ENSG00000112312;ENSG00000164815;ENSG00000073111;ENSG00000112118;ENSG00000104738;ENSG00000100297;ENSG00000076003;ENSG00000167513;ENSG00000094804	20 (20)	0.00135	0.035	0		0 (0)	1	1	0.00135	0.035
884	Zinc	ZnO NP-NM110 06h	Down	Influenza Viral RNA Transcription and Replication	Reactome	19	ENSG00000111581;ENSG00000065150;ENSG00000094914;ENSG00000047410;ENSG00000132182;ENSG00000047315;ENSG00000075188;ENSG00000030066;ENSG00000069248;ENSG00000120253;ENSG00000213024;ENSG00000181222;ENSG00000095319;ENSG00000102900;ENSG00000163002;ENSG00000058804;ENSG00000153201;ENSG00000155561;ENSG00000125450	44 (44)	0.0014	0.0363	0		0 (5)	1	1	0.0014	0.0363
885	Zinc	ZnO NP-NM110 06h	Down	Coregulation of Androgen receptor activity	PID	23	ENSG00000112576;ENSG00000142453;ENSG00000140396;ENSG00000198646;ENSG00000127946;ENSG00000012048;ENSG00000131788;ENSG00000141456;ENSG00000114062;ENSG00000170515;ENSG00000010017;ENSG00000064012;ENSG00000157500;ENSG00000144744;ENSG00000134215;ENSG00000171467;ENSG00000253729;ENSG00000125686;ENSG00000079246;ENSG00000033800;ENSG00000169083;ENSG00000110092;ENSG00000004487	57 (61)	0.00142	0.0366	0		0 (2)	1	1	0.00142	0.0366
886	Zinc	ZnO NP-NM110 06h	Down	Regulation of PLK1 Activity at G2/M Transition	Reactome	35	ENSG00000087586;ENSG00000175216;ENSG00000104833;ENSG00000188229;ENSG00000092036;ENSG00000127914;ENSG00000116127;ENSG00000148019;ENSG00000072864;ENSG00000213397;ENSG00000157456;ENSG00000126001;ENSG00000007168;ENSG00000249115;ENSG00000196230;ENSG00000072062;ENSG00000114107;ENSG00000005249;ENSG00000136861;ENSG00000141577;ENSG00000101639;ENSG00000101624;ENSG00000117650;ENSG00000139350;ENSG00000129474…	87 (90)	9.98e-05	0.00449	0		1 (5)	1	1	0.00102	0.0391
887	Zinc	ZnO NP-NM110 06h	Down	Spliceosome - Homo sapiens (human)	KEGG	44	ENSG00000109606;ENSG00000196504;ENSG00000084463;ENSG00000188529;ENSG00000145833;ENSG00000136450;ENSG00000085872;ENSG00000164548;ENSG00000116350;ENSG00000124193;ENSG00000115875;ENSG00000136527;ENSG00000113649;ENSG00000110844;ENSG00000136875;ENSG00000179950;ENSG00000141543;ENSG00000263465;ENSG00000099995;ENSG00000147274;ENSG00000163714;ENSG00000170144;ENSG00000198231;ENSG00000060688;ENSG00000111196…	131 (134)	0.00154	0.0395	0		0 (0)	1	1	0.00154	0.0395
888	Zinc	ZnO NP-NM110 06h	Down	BARD1 signaling events	PID	14	ENSG00000012048;ENSG00000175054;ENSG00000112039;ENSG00000104320;ENSG00000138376;ENSG00000101138;ENSG00000101773;ENSG00000132646;ENSG00000183161;ENSG00000221829;ENSG00000079246;ENSG00000141510;ENSG00000253729;ENSG00000123374	29 (30)	0.00163	0.0409	0		0 (0)	1	1	0.00163	0.0409
889	Zinc	ZnO NP-NM110 06h	Down	Androgen receptor signaling pathway	Wikipathways	31	ENSG00000142453;ENSG00000134318;ENSG00000143878;ENSG00000141027;ENSG00000132341;ENSG00000114166;ENSG00000140396;ENSG00000172977;ENSG00000012048;ENSG00000103266;ENSG00000067113;ENSG00000104964;ENSG00000114062;ENSG00000179218;ENSG00000145675;ENSG00000105647;ENSG00000131470;ENSG00000131788;ENSG00000084676;ENSG00000067900;ENSG00000073584;ENSG00000110092;ENSG00000171467;ENSG00000169375;ENSG00000105974…	85 (89)	0.00172	0.0426	0		0 (0)	1	1	0.00172	0.0426
890	Zinc	ZnO NP-NM110 06h	Down	DNA Double-Strand Break Repair	Reactome	54	ENSG00000197299;ENSG00000178966;ENSG00000111247;ENSG00000005156;ENSG00000143799;ENSG00000080345;ENSG00000153147;ENSG00000136492;ENSG00000113456;ENSG00000174371;ENSG00000172977;ENSG00000164053;ENSG00000011485;ENSG00000175054;ENSG00000073050;ENSG00000152457;ENSG00000100479;ENSG00000101773;ENSG00000075131;ENSG00000270882;ENSG00000163605;ENSG00000129484;ENSG00000270276;ENSG00000042088;ENSG00000175643…	153 (171)	0.000116	0.00512	0		3 (14)	1	1	0.00117	0.044
891	Zinc	ZnO NP-NM110 06h	Down	Pathways Affected in Adenoid Cystic Carcinoma	Wikipathways	23	ENSG00000141027;ENSG00000181555;ENSG00000198586;ENSG00000245848;ENSG00000012048;ENSG00000085224;ENSG00000141736;ENSG00000072501;ENSG00000214114;ENSG00000185787;ENSG00000085185;ENSG00000080503;ENSG00000165671;ENSG00000073584;ENSG00000253729;ENSG00000160867;ENSG00000080603;ENSG00000183337;ENSG00000117713;ENSG00000174197;ENSG00000005339;ENSG00000100393;ENSG00000141510	58 (63)	0.00187	0.0462	0		0 (0)	1	1	0.00187	0.0462
892	Zinc	ZnO NP-NM110 06h	Down	ATM Signaling Network in Development and Disease	Wikipathways	19	ENSG00000011485;ENSG00000175054;ENSG00000104320;ENSG00000152457;ENSG00000188486;ENSG00000172977;ENSG00000253729;ENSG00000101773;ENSG00000170836;ENSG00000080345;ENSG00000103549;ENSG00000072501;ENSG00000119383;ENSG00000067369;ENSG00000149554;ENSG00000132356;ENSG00000178999;ENSG00000143815;ENSG00000160211	45 (46)	0.00193	0.0475	0		0 (1)	1	1	0.00193	0.0475
893	Zinc	ZnO NP-NM110 06h	Down	Regulation of lipid metabolism by Peroxisome proliferator-activated receptor alpha (PPARalpha)	Reactome	12	ENSG00000142453;ENSG00000140396;ENSG00000177565;ENSG00000084676;ENSG00000005339;ENSG00000082014;ENSG00000177200;ENSG00000198646;ENSG00000186350;ENSG00000169375;ENSG00000141027;ENSG00000125686	19 (20)	0.000137	0.00584	0		2 (5)	1	1	0.00135	0.0481
894	Zinc	ZnO NP-NM110 06h	Down	Sterol Regulatory Element-Binding Proteins (SREBP) signalling	Wikipathways	26	ENSG00000132964;ENSG00000118217;ENSG00000150961;ENSG00000169710;ENSG00000114650;ENSG00000099194;ENSG00000278540;ENSG00000176986;ENSG00000079459;ENSG00000131473;ENSG00000154930;ENSG00000073060;ENSG00000104549;ENSG00000132356;ENSG00000001630;ENSG00000072062;ENSG00000072310;ENSG00000012174;ENSG00000119927;ENSG00000113161;ENSG00000138674;ENSG00000170881;ENSG00000100811;ENSG00000105723;ENSG00000100934…	64 (68)	0.000632	0.0188	1	HMDB00122	2 (5)	0.22	1	0.00138	0.0481
895	Zinc	ZnO NP-NM110 06h	Down	Condensation of Prometaphase Chromosomes	Reactome	9	ENSG00000136824;ENSG00000254598;ENSG00000113810;ENSG00000121152;ENSG00000157456;ENSG00000101266;ENSG00000109805;ENSG00000134057;ENSG00000010292	12 (12)	0.00014	0.00588	0		1 (4)	1	1	0.00139	0.0481
896	Zinc	ZnO NP-NM110 06h	Down	Hexose transport	Reactome	18	ENSG00000111581;ENSG00000120253;ENSG00000047410;ENSG00000132182;ENSG00000075188;ENSG00000137700;ENSG00000153201;ENSG00000069248;ENSG00000117394;ENSG00000213024;ENSG00000094914;ENSG00000095319;ENSG00000102900;ENSG00000163002;ENSG00000058804;ENSG00000030066;ENSG00000155561;ENSG00000125450	44 (53)	0.00381	0.0773	2	HMDB00169;HMDB03345	3 (14)	0.0372	1	0.0014	0.0481
897	Zinc	ZnO NP-NM110 06h	Down	Influenza Life Cycle	Reactome	24	ENSG00000065150;ENSG00000047410;ENSG00000132341;ENSG00000153201;ENSG00000094914;ENSG00000058804;ENSG00000125450;ENSG00000111581;ENSG00000179218;ENSG00000075188;ENSG00000181222;ENSG00000047315;ENSG00000132182;ENSG00000069248;ENSG00000120253;ENSG00000213024;ENSG00000095319;ENSG00000102900;ENSG00000082898;ENSG00000030066;ENSG00000163002;ENSG00000114030;ENSG00000108424;ENSG00000155561	53 (53)	0.000143	0.00593	0		1 (9)	1	1	0.00141	0.0481
898	Zinc	ZnO NP-NM110 06h	Down	Regulation of nuclear beta catenin signaling and target gene transcription	PID	25	ENSG00000140396;ENSG00000159217;ENSG00000196367;ENSG00000107984;ENSG00000149503;ENSG00000104964;ENSG00000106829;ENSG00000038427;ENSG00000134982;ENSG00000100888;ENSG00000110092;ENSG00000168646;ENSG00000087245;ENSG00000082898;ENSG00000116128;ENSG00000178585;ENSG00000177565;ENSG00000039068;ENSG00000108953;ENSG00000128245;ENSG00000169083;ENSG00000184634;ENSG00000100393;ENSG00000116478;ENSG00000196591	65 (81)	0.00201	0.049	0		0 (2)	1	1	0.00201	0.049
899	Zinc	ZnO NP-NM110 06h	Down	TP53 Regulates Transcription of Genes Involved in G2 Cell Cycle Arrest	Reactome	10	ENSG00000142453;ENSG00000087088;ENSG00000087586;ENSG00000126457;ENSG00000080839;ENSG00000103479;ENSG00000100393;ENSG00000141510;ENSG00000132646;ENSG00000134057	18 (19)	0.00202	0.0491	0		0 (0)	1	1	0.00202	0.0491
900	Zinc	ZnO NP-NM110 06h	Down	Viral Messenger RNA Synthesis	Reactome	18	ENSG00000111581;ENSG00000120253;ENSG00000094914;ENSG00000047410;ENSG00000132182;ENSG00000047315;ENSG00000075188;ENSG00000030066;ENSG00000069248;ENSG00000213024;ENSG00000181222;ENSG00000095319;ENSG00000102900;ENSG00000163002;ENSG00000058804;ENSG00000153201;ENSG00000155561;ENSG00000125450	42 (42)	0.00206	0.0495	0		0 (5)	1	1	0.00206	0.0495
901	Zinc	ZnO NP-NM110 24h	Up	Mineral absorption - Homo sapiens (human)	KEGG	9	ENSG00000170385;ENSG00000125148;ENSG00000205362;ENSG00000198417;ENSG00000125144;ENSG00000205358;ENSG00000187193;ENSG00000066230;ENSG00000100292	41 (52)	0.000959	0.218	11	HMDB00187;HMDB00162;HMDB00696;HMDB00167;HMDB00883;HMDB00168;HMDB00123;HMDB00172;HMDB00159;HMDB00929;HMDB13773;HMDB00687	15 (29)	1.42e-07	0.000567	3.24e-09	4.51e-06
902	Zinc	ZnO NP-NM110 24h	Up	Direct p53 effectors	PID	26	ENSG00000196754;ENSG00000124762;ENSG00000113328;ENSG00000177606;ENSG00000159388;ENSG00000104765;ENSG00000116017;ENSG00000104419;ENSG00000146674;ENSG00000164938;ENSG00000130513;ENSG00000120129;ENSG00000138166;ENSG00000161513;ENSG00000106366;ENSG00000001167;ENSG00000143384;ENSG00000162772;ENSG00000135679;ENSG00000026103;ENSG00000090097;ENSG00000105327;ENSG00000134574;ENSG00000080546;ENSG00000116717…	135 (147)	3.53e-07	0.000654	0		0 (1)	1	1	3.53e-07	0.000654
903	Zinc	ZnO NP-NM110 24h	Up	Metallothioneins bind metals	Reactome	6	ENSG00000205362;ENSG00000198417;ENSG00000125144;ENSG00000205358;ENSG00000187193;ENSG00000125148	7 (12)	4.54e-07	0.000654	0		0 (4)	1	1	4.54e-07	0.000654
904	Zinc	ZnO NP-NM110 24h	Up	Response to metal ions	Reactome	6	ENSG00000205362;ENSG00000198417;ENSG00000125144;ENSG00000205358;ENSG00000187193;ENSG00000125148	7 (12)	4.54e-07	0.000654	0		0 (4)	1	1	4.54e-07	0.000654
905	Zinc	ZnO NP-NM110 24h	Up	Protein digestion and absorption - Homo sapiens (human)	KEGG	8	ENSG00000188153;ENSG00000134294;ENSG00000197565;ENSG00000142156;ENSG00000142173;ENSG00000112280;ENSG00000066230;ENSG00000065618	57 (90)	0.0282	1	14	HMDB00187;HMDB00162;HMDB00696;HMDB00167;HMDB00883;HMDB00168;HMDB00123;HMDB00172;HMDB00159;HMDB00929;HMDB34301;HMDB01414;HMDB00158;HMDB13773;HMDB00687	28 (47)	2.14e-06	0.00107	1.06e-06	0.000742
906	Zinc	ZnO NP-NM110 24h	Up	Class I MHC mediated antigen processing & presentation	Wikipathways	0		0 (0)	1	1	12	HMDB00187;HMDB00162;HMDB00696;HMDB00167;HMDB00883;HMDB00168;HMDB00123;HMDB00172;HMDB00159;HMDB00929;HMDB00158;HMDB13773;HMDB00687	21 (35)	2.05e-06	0.00107	2.05e-06	0.00107
907	Zinc	ZnO NP-NM110 24h	Up	tRNA Aminoacylation	Wikipathways	0		0 (0)	1	1	12	HMDB00187;HMDB00162;HMDB00696;HMDB00167;HMDB00883;HMDB00168;HMDB00123;HMDB00172;HMDB00159;HMDB00929;HMDB00158;HMDB13773;HMDB00687	21 (26)	2.05e-06	0.00107	2.05e-06	0.00107
908	Zinc	ZnO NP-NM110 24h	Up	Roxithromycin Action Pathway	SMPDB	0		0 (0)	1	1	8	HMDB00162;HMDB00696;HMDB00167;HMDB00168;HMDB00883;HMDB03406;HMDB00172;HMDB13773;HMDB00687	11 (20)	1.07e-05	0.00112	1.07e-05	0.00112
909	Zinc	ZnO NP-NM110 24h	Up	Josamycin Action Pathway	SMPDB	0		0 (0)	1	1	8	HMDB00162;HMDB00696;HMDB00167;HMDB00168;HMDB00883;HMDB03406;HMDB00172;HMDB13773;HMDB00687	11 (20)	1.07e-05	0.00112	1.07e-05	0.00112
910	Zinc	ZnO NP-NM110 24h	Up	Methacycline Action Pathway	SMPDB	0		0 (0)	1	1	8	HMDB00162;HMDB00696;HMDB00167;HMDB00168;HMDB00883;HMDB03406;HMDB00172;HMDB13773;HMDB00687	11 (20)	1.07e-05	0.00112	1.07e-05	0.00112
911	Zinc	ZnO NP-NM110 24h	Up	Tigecycline Action Pathway	SMPDB	0		0 (0)	1	1	8	HMDB00162;HMDB00696;HMDB00167;HMDB00168;HMDB00883;HMDB03406;HMDB00172;HMDB13773;HMDB00687	11 (20)	1.07e-05	0.00112	1.07e-05	0.00112
912	Zinc	ZnO NP-NM110 24h	Up	Arbekacin Action Pathway	SMPDB	0		0 (0)	1	1	8	HMDB00162;HMDB00696;HMDB00167;HMDB00168;HMDB00883;HMDB03406;HMDB00172;HMDB13773;HMDB00687	11 (20)	1.07e-05	0.00112	1.07e-05	0.00112
913	Zinc	ZnO NP-NM110 24h	Up	Paromomycin Action Pathway	SMPDB	0		0 (0)	1	1	8	HMDB00162;HMDB00696;HMDB00167;HMDB00168;HMDB00883;HMDB03406;HMDB00172;HMDB13773;HMDB00687	11 (20)	1.07e-05	0.00112	1.07e-05	0.00112
914	Zinc	ZnO NP-NM110 24h	Up	Oxytetracycline Action Pathway	SMPDB	0		0 (0)	1	1	8	HMDB00162;HMDB00696;HMDB00167;HMDB00168;HMDB00883;HMDB03406;HMDB00172;HMDB13773;HMDB00687	11 (20)	1.07e-05	0.00112	1.07e-05	0.00112
915	Zinc	ZnO NP-NM110 24h	Up	Clomocycline Action Pathway	SMPDB	0		0 (0)	1	1	8	HMDB00162;HMDB00696;HMDB00167;HMDB00168;HMDB00883;HMDB03406;HMDB00172;HMDB13773;HMDB00687	11 (20)	1.07e-05	0.00112	1.07e-05	0.00112
916	Zinc	ZnO NP-NM110 24h	Up	Lincomycin Action Pathway	SMPDB	0		0 (0)	1	1	8	HMDB00162;HMDB00696;HMDB00167;HMDB00168;HMDB00883;HMDB03406;HMDB00172;HMDB13773;HMDB00687	11 (20)	1.07e-05	0.00112	1.07e-05	0.00112
917	Zinc	ZnO NP-NM110 24h	Up	Demeclocycline Action Pathway	SMPDB	0		0 (0)	1	1	8	HMDB00162;HMDB00696;HMDB00167;HMDB00168;HMDB00883;HMDB03406;HMDB00172;HMDB13773;HMDB00687	11 (20)	1.07e-05	0.00112	1.07e-05	0.00112
918	Zinc	ZnO NP-NM110 24h	Up	Rolitetracycline Action Pathway	SMPDB	0		0 (0)	1	1	8	HMDB00162;HMDB00696;HMDB00167;HMDB00168;HMDB00883;HMDB03406;HMDB00172;HMDB13773;HMDB00687	11 (20)	1.07e-05	0.00112	1.07e-05	0.00112
919	Zinc	ZnO NP-NM110 24h	Up	Spectinomycin Action Pathway	SMPDB	0		0 (0)	1	1	8	HMDB00162;HMDB00696;HMDB00167;HMDB00168;HMDB00883;HMDB03406;HMDB00172;HMDB13773;HMDB00687	11 (20)	1.07e-05	0.00112	1.07e-05	0.00112
920	Zinc	ZnO NP-NM110 24h	Up	Kanamycin Action Pathway	SMPDB	0		0 (0)	1	1	8	HMDB00162;HMDB00696;HMDB00167;HMDB00168;HMDB00883;HMDB03406;HMDB00172;HMDB13773;HMDB00687	11 (20)	1.07e-05	0.00112	1.07e-05	0.00112
921	Zinc	ZnO NP-NM110 24h	Up	Gentamicin Action Pathway	SMPDB	0		0 (0)	1	1	8	HMDB00162;HMDB00696;HMDB00167;HMDB00168;HMDB00883;HMDB03406;HMDB00172;HMDB13773;HMDB00687	11 (20)	1.07e-05	0.00112	1.07e-05	0.00112
922	Zinc	ZnO NP-NM110 24h	Up	Netilmicin Action Pathway	SMPDB	0		0 (0)	1	1	8	HMDB00162;HMDB00696;HMDB00167;HMDB00168;HMDB00883;HMDB03406;HMDB00172;HMDB13773;HMDB00687	11 (20)	1.07e-05	0.00112	1.07e-05	0.00112
923	Zinc	ZnO NP-NM110 24h	Up	Neomycin Action Pathway	SMPDB	0		0 (0)	1	1	8	HMDB00162;HMDB00696;HMDB00167;HMDB00168;HMDB00883;HMDB03406;HMDB00172;HMDB13773;HMDB00687	11 (20)	1.07e-05	0.00112	1.07e-05	0.00112
924	Zinc	ZnO NP-NM110 24h	Up	Erythromycin Action Pathway	SMPDB	0		0 (0)	1	1	8	HMDB00162;HMDB00696;HMDB00167;HMDB00168;HMDB00883;HMDB03406;HMDB00172;HMDB13773;HMDB00687	11 (20)	1.07e-05	0.00112	1.07e-05	0.00112
925	Zinc	ZnO NP-NM110 24h	Up	Amikacin Action Pathway	SMPDB	0		0 (0)	1	1	8	HMDB00162;HMDB00696;HMDB00167;HMDB00168;HMDB00883;HMDB03406;HMDB00172;HMDB13773;HMDB00687	11 (20)	1.07e-05	0.00112	1.07e-05	0.00112
926	Zinc	ZnO NP-NM110 24h	Up	Telithromycin Action Pathway	SMPDB	0		0 (0)	1	1	8	HMDB00162;HMDB00696;HMDB00167;HMDB00168;HMDB00883;HMDB03406;HMDB00172;HMDB13773;HMDB00687	11 (20)	1.07e-05	0.00112	1.07e-05	0.00112
927	Zinc	ZnO NP-NM110 24h	Up	Lymecycline Action Pathway	SMPDB	0		0 (0)	1	1	8	HMDB00162;HMDB00696;HMDB00167;HMDB00168;HMDB00883;HMDB03406;HMDB00172;HMDB13773;HMDB00687	11 (20)	1.07e-05	0.00112	1.07e-05	0.00112
928	Zinc	ZnO NP-NM110 24h	Up	Chloramphenicol Action Pathway	SMPDB	0		0 (0)	1	1	8	HMDB00162;HMDB00696;HMDB00167;HMDB00168;HMDB00883;HMDB03406;HMDB00172;HMDB13773;HMDB00687	11 (20)	1.07e-05	0.00112	1.07e-05	0.00112
929	Zinc	ZnO NP-NM110 24h	Up	Troleandomycin Action Pathway	SMPDB	0		0 (0)	1	1	8	HMDB00162;HMDB00696;HMDB00167;HMDB00168;HMDB00883;HMDB03406;HMDB00172;HMDB13773;HMDB00687	11 (20)	1.07e-05	0.00112	1.07e-05	0.00112
930	Zinc	ZnO NP-NM110 24h	Up	Azithromycin Action Pathway	SMPDB	0		0 (0)	1	1	8	HMDB00162;HMDB00696;HMDB00167;HMDB00168;HMDB00883;HMDB03406;HMDB00172;HMDB13773;HMDB00687	11 (20)	1.07e-05	0.00112	1.07e-05	0.00112
931	Zinc	ZnO NP-NM110 24h	Up	Clindamycin Action Pathway	SMPDB	0		0 (0)	1	1	8	HMDB00162;HMDB00696;HMDB00167;HMDB00168;HMDB00883;HMDB03406;HMDB00172;HMDB13773;HMDB00687	11 (20)	1.07e-05	0.00112	1.07e-05	0.00112
932	Zinc	ZnO NP-NM110 24h	Up	Streptomycin Action Pathway	SMPDB	0		0 (0)	1	1	8	HMDB00162;HMDB00696;HMDB00167;HMDB00168;HMDB00883;HMDB03406;HMDB00172;HMDB13773;HMDB00687	11 (20)	1.07e-05	0.00112	1.07e-05	0.00112
933	Zinc	ZnO NP-NM110 24h	Up	Clarithromycin Action Pathway	SMPDB	0		0 (0)	1	1	8	HMDB00162;HMDB00696;HMDB00167;HMDB00168;HMDB00883;HMDB03406;HMDB00172;HMDB13773;HMDB00687	11 (20)	1.07e-05	0.00112	1.07e-05	0.00112
934	Zinc	ZnO NP-NM110 24h	Up	Tobramycin Action Pathway	SMPDB	0		0 (0)	1	1	8	HMDB00162;HMDB00696;HMDB00167;HMDB00168;HMDB00883;HMDB03406;HMDB00172;HMDB13773;HMDB00687	11 (20)	1.07e-05	0.00112	1.07e-05	0.00112
935	Zinc	ZnO NP-NM110 24h	Up	Minocycline Action Pathway	SMPDB	0		0 (0)	1	1	8	HMDB00162;HMDB00696;HMDB00167;HMDB00168;HMDB00883;HMDB03406;HMDB00172;HMDB13773;HMDB00687	11 (20)	1.07e-05	0.00112	1.07e-05	0.00112
936	Zinc	ZnO NP-NM110 24h	Up	Transport of inorganic cations-anions and amino acids-oligopeptides	Wikipathways	0		0 (0)	1	1	15	HMDB00214;HMDB00187;HMDB00162;HMDB00696;HMDB00167;HMDB03406;HMDB00883;HMDB00168;HMDB00123;HMDB00172;HMDB00159;HMDB00929;HMDB00158;HMDB00043;HMDB13773;HMDB00687	36 (51)	1.55e-05	0.00159	1.55e-05	0.00159
937	Zinc	ZnO NP-NM110 24h	Up	Tetracycline Action Pathway	SMPDB	0		0 (0)	1	1	8	HMDB00162;HMDB00696;HMDB00167;HMDB00168;HMDB00883;HMDB03406;HMDB00172;HMDB13773;HMDB00687	12 (20)	2.86e-05	0.00272	2.86e-05	0.00272
938	Zinc	ZnO NP-NM110 24h	Up	Doxycycline Action Pathway	SMPDB	0		0 (0)	1	1	8	HMDB00162;HMDB00696;HMDB00167;HMDB00168;HMDB00883;HMDB03406;HMDB00172;HMDB13773;HMDB00687	12 (20)	2.86e-05	0.00272	2.86e-05	0.00272
939	Zinc	ZnO NP-NM110 24h	Up	HIF-1-alpha transcription factor network	PID	15	ENSG00000134954;ENSG00000164442;ENSG00000123095;ENSG00000115738;ENSG00000134107;ENSG00000143384;ENSG00000135318;ENSG00000177606;ENSG00000129521;ENSG00000166949;ENSG00000100292;ENSG00000147872;ENSG00000146678;ENSG00000104419;ENSG00000106366	60 (67)	3.9e-06	0.00337	0		0 (2)	1	1	3.9e-06	0.00337
940	Zinc	ZnO NP-NM110 24h	Up	Transport of glucose and other sugars_ bile salts and organic acids_ metal ions and amine compounds	Wikipathways	0		0 (0)	1	1	14	HMDB00187;HMDB00162;HMDB00696;HMDB00167;HMDB00883;HMDB00168;HMDB00043;HMDB00123;HMDB00172;HMDB00159;HMDB00929;HMDB00158;HMDB01257;HMDB13773;HMDB00687	34 (83)	3.78e-05	0.00351	3.78e-05	0.00351
941	Zinc	ZnO NP-NM110 24h	Up	tRNA charging	HumanCyc	2	ENSG00000090861;ENSG00000112855	38 (41)	0.711	1	12	HMDB00187;HMDB00162;HMDB00696;HMDB00167;HMDB00883;HMDB00168;HMDB00123;HMDB00172;HMDB00159;HMDB00929;HMDB00158;HMDB13773;HMDB00687	20 (24)	9.83e-07	0.00107	1.06e-05	0.00493
942	Zinc	ZnO NP-NM110 24h	Up	Amino Acid interconversion	Wikipathways	0		0 (0)	1	1	14	HMDB00214;HMDB00187;HMDB00162;HMDB00696;HMDB00719;HMDB00167;HMDB00883;HMDB00168;HMDB00123;HMDB00172;HMDB00159;HMDB00929;HMDB00158;HMDB13773;HMDB00687	35 (51)	5.63e-05	0.0051	5.63e-05	0.0051
943	Zinc	ZnO NP-NM110 24h	Up	Generic Transcription Pathway	Reactome	84	ENSG00000105136;ENSG00000160352;ENSG00000164442;ENSG00000134574;ENSG00000256223;ENSG00000178229;ENSG00000153234;ENSG00000197935;ENSG00000177606;ENSG00000196235;ENSG00000113328;ENSG00000204947;ENSG00000184939;ENSG00000130544;ENSG00000159388;ENSG00000104765;ENSG00000141391;ENSG00000160908;ENSG00000104419;ENSG00000146674;ENSG00000089335;ENSG00000197363;ENSG00000106261;ENSG00000213030;ENSG00000130684…	781 (861)	1.17e-06	0.00126	0		9 (40)	1	1	1.71e-05	0.00595
944	Zinc	ZnO NP-NM110 24h	Up	Aminoacyl-tRNA biosynthesis - Homo sapiens (human)	KEGG	2	ENSG00000090861;ENSG00000112855	50 (66)	0.84	1	12	HMDB00187;HMDB00162;HMDB00696;HMDB00167;HMDB00883;HMDB00168;HMDB00123;HMDB00172;HMDB00159;HMDB00929;HMDB00158;HMDB13773;HMDB00687	21 (52)	2.05e-06	0.00107	2.46e-05	0.00599
945	Zinc	ZnO NP-NM110 24h	Up	leukotriene biosynthesis	HumanCyc	0		2 (5)	1	1	12	HMDB00187;HMDB00162;HMDB00696;HMDB00167;HMDB00883;HMDB00168;HMDB00123;HMDB00172;HMDB00159;HMDB00929;HMDB00158;HMDB13773;HMDB00687	21 (30)	2.05e-06	0.00107	2.89e-05	0.00599
946	Zinc	ZnO NP-NM110 24h	Up	&gamma;-glutamyl cycle	HumanCyc	0		6 (6)	1	1	14	HMDB00214;HMDB00187;HMDB00162;HMDB00696;HMDB00167;HMDB00883;HMDB00168;HMDB00123;HMDB00172;HMDB00159;HMDB00929;HMDB01325;HMDB00158;HMDB13773;HMDB00687	28 (48)	2.14e-06	0.00107	3.01e-05	0.00599
947	Zinc	ZnO NP-NM110 24h	Up	ECM-receptor interaction - Homo sapiens (human)	KEGG	15	ENSG00000132470;ENSG00000196569;ENSG00000053747;ENSG00000188153;ENSG00000197565;ENSG00000168477;ENSG00000259207;ENSG00000142156;ENSG00000142173;ENSG00000058085;ENSG00000112280;ENSG00000143127;ENSG00000164171;ENSG00000041982;ENSG00000169231	64 (82)	9.2e-06	0.00662	0		0 (1)	1	1	9.2e-06	0.00662
948	Zinc	ZnO NP-NM110 24h	Up	Assembly of collagen fibrils and other multimeric structures	Reactome	11	ENSG00000134013;ENSG00000142156;ENSG00000164733;ENSG00000053747;ENSG00000188153;ENSG00000197565;ENSG00000132470;ENSG00000142173;ENSG00000058085;ENSG00000112280;ENSG00000196611	37 (49)	1.29e-05	0.00795	0		0 (5)	1	1	1.29e-05	0.00795
949	Zinc	ZnO NP-NM110 24h	Up	Validated transcriptional targets of TAp63 isoforms	PID	13	ENSG00000135679;ENSG00000124762;ENSG00000026103;ENSG00000196754;ENSG00000105327;ENSG00000132470;ENSG00000130513;ENSG00000116717;ENSG00000161513;ENSG00000181026;ENSG00000134508;ENSG00000105856;ENSG00000146674	52 (57)	1.72e-05	0.0093	0		0 (0)	1	1	1.72e-05	0.0093
950	Zinc	ZnO NP-NM110 24h	Up	<i>S</i>-methyl-5-thio-&alpha;-D-ribose 1-phosphate degradation	HumanCyc	0		4 (4)	1	1	12	HMDB00187;HMDB00162;HMDB00696;HMDB00167;HMDB00883;HMDB00168;HMDB00123;HMDB00172;HMDB00159;HMDB00929;HMDB00158;HMDB13773;HMDB00687	22 (35)	4.02e-06	0.00112	5.39e-05	0.00939
951	Zinc	ZnO NP-NM110 24h	Up	Amino acid transport across the plasma membrane	Reactome	1	ENSG00000134294	22 (31)	0.768	1	12	HMDB00214;HMDB00162;HMDB00172;HMDB00883;HMDB00168;HMDB00123;HMDB03406;HMDB00159;HMDB00929;HMDB00158;HMDB00043;HMDB13773;HMDB00687	23 (32)	7.5e-06	0.00112	7.52e-05	0.0116
952	Zinc	ZnO NP-NM110 24h	Up	spermine and spermidine degradation I	HumanCyc	2	ENSG00000088826;ENSG00000141504	5 (5)	0.0362	1	4	HMDB01276;HMDB01257;HMDB01414;HMDB12880	4 (13)	0.000341	0.0262	0.000152	0.0211
953	Zinc	ZnO NP-NM110 24h	Up	TGF-beta Signaling Pathway	Wikipathways	21	ENSG00000177606;ENSG00000134954;ENSG00000124762;ENSG00000041982;ENSG00000067082;ENSG00000163513;ENSG00000259207;ENSG00000132470;ENSG00000137693;ENSG00000108854;ENSG00000157456;ENSG00000104814;ENSG00000196611;ENSG00000125740;ENSG00000162772;ENSG00000103479;ENSG00000138134;ENSG00000166949;ENSG00000164171;ENSG00000124813;ENSG00000155090	128 (132)	5.98e-05	0.0235	0		0 (0)	1	1	5.98e-05	0.0235
954	Zinc	ZnO NP-NM110 24h	Up	Validated targets of C-MYC transcriptional repression	PID	13	ENSG00000001167;ENSG00000124762;ENSG00000115738;ENSG00000120885;ENSG00000132470;ENSG00000116717;ENSG00000123933;ENSG00000175197;ENSG00000116809;ENSG00000104332;ENSG00000166949;ENSG00000119772;ENSG00000104419	58 (75)	5.99e-05	0.0235	0		0 (0)	1	1	5.99e-05	0.0235
955	Zinc	ZnO NP-NM110 24h	Up	Phase II conjugation	Wikipathways	0		0 (0)	1	1	13	HMDB00187;HMDB00162;HMDB00696;HMDB00167;HMDB00883;HMDB00168;HMDB00123;HMDB00172;HMDB00159;HMDB00929;HMDB00158;HMDB11723;HMDB00714;HMDB13773;HMDB00687	36 (164)	0.000382	0.0287	0.000382	0.0287
956	Zinc	ZnO NP-NM110 24h	Up	mRNA_ protein_ and metabolite inducation pathway by cyclosporin A	Wikipathways	0		6 (6)	1	1	7	HMDB00167;HMDB00168;HMDB00883;HMDB00172;HMDB00929;HMDB00158;HMDB13773;HMDB00687	9 (9)	2.1e-05	0.00209	0.000247	0.0313
957	Zinc	ZnO NP-NM110 24h	Up	Collagen formation	Reactome	15	ENSG00000188153;ENSG00000142156;ENSG00000164733;ENSG00000053747;ENSG00000149257;ENSG00000197565;ENSG00000132470;ENSG00000142173;ENSG00000072682;ENSG00000134013;ENSG00000058085;ENSG00000196611;ENSG00000084636;ENSG00000065618;ENSG00000112280	71 (94)	3.47e-05	0.0166	0		2 (13)	1	1	0.000391	0.0453
958	Zinc	ZnO NP-NM110 24h	Up	Na+/Cl- dependent neurotransmitter transporters	Reactome	1	ENSG00000010379	10 (19)	0.485	1	10	HMDB00162;HMDB00123;HMDB00168;HMDB00883;HMDB00172;HMDB00159;HMDB00929;HMDB00158;HMDB00043;HMDB13773;HMDB00687	20 (31)	8.03e-05	0.00696	0.000434	0.0466
959	Zinc	ZnO NP-NM110 24h	Up	Amine compound SLC transporters	Reactome	2	ENSG00000140519;ENSG00000010379	18 (30)	0.323	1	10	HMDB00162;HMDB00123;HMDB00168;HMDB00883;HMDB00172;HMDB00159;HMDB00929;HMDB00158;HMDB00043;HMDB13773;HMDB00687	21 (35)	0.000136	0.0116	0.000487	0.0484
960	Zinc	ZnO NP-NM110 24h	Down	Metabolism	Reactome	218	ENSG00000179091;ENSG00000159199;ENSG00000113924;ENSG00000168710;ENSG00000115286;ENSG00000135454;ENSG00000143819;ENSG00000165389;ENSG00000125450;ENSG00000278540;ENSG00000078124;ENSG00000120437;ENSG00000116096;ENSG00000198848;ENSG00000154930;ENSG00000171428;ENSG00000001630;ENSG00000073060;ENSG00000072310;ENSG00000012660;ENSG00000158201;ENSG00000116649;ENSG00000198682;ENSG00000074416;ENSG00000198610…	1669 (2035)	1.46e-10	6.32e-07	36	HMDB00094;HMDB01049;HMDB00251;HMDB06483;HMDB00500;HMDB00564;HMDB08031;HMDB07871;HMDB07901;HMDB07902;HMDB07998;HMDB07870;HMDB07933;HMDB07966;HMDB07101;HMDB07214;HMDB07129;HMDB00267;HMDB00190;HMDB02031;HMDB01870;HMDB00191;HMDB00161;HMDB00271;HMDB00641;HMDB00156;HMDB06408;HMDB08956;HMDB05780;HMDB09054;HMDB09052;HMDB08828;HMDB08987;HMDB08859;HMDB09219;HMDB08924;HMDB08894;HMDB08899;HMDB00965;HMDB01372…	166 (1265)	0.0367	1	1.45e-10	2.63e-07
961	Zinc	ZnO NP-NM110 24h	Down	Parkin-Ubiquitin Proteasomal System pathway	Wikipathways	21	ENSG00000127824;ENSG00000184702;ENSG00000165916;ENSG00000204389;ENSG00000204388;ENSG00000176014;ENSG00000173692;ENSG00000044574;ENSG00000181788;ENSG00000188229;ENSG00000137267;ENSG00000013275;ENSG00000099341;ENSG00000167552;ENSG00000187522;ENSG00000243910;ENSG00000185627;ENSG00000123416;ENSG00000095261;ENSG00000196230;ENSG00000108671	67 (73)	1.58e-07	0.000122	0		0 (0)	1	1	1.58e-07	0.000122
962	Zinc	ZnO NP-NM110 24h	Down	Proteasome - Homo sapiens (human)	KEGG	15	ENSG00000173692;ENSG00000205220;ENSG00000165916;ENSG00000013275;ENSG00000185627;ENSG00000132963;ENSG00000099341;ENSG00000100567;ENSG00000108671;ENSG00000100902;ENSG00000101182;ENSG00000277791;ENSG00000100804;ENSG00000142507;ENSG00000131467	41 (44)	1.02e-06	0.00017	0		0 (0)	1	1	1.02e-06	0.00017
963	Zinc	ZnO NP-NM110 24h	Down	TNF	INOH	19	ENSG00000205220;ENSG00000165916;ENSG00000013275;ENSG00000104825;ENSG00000173692;ENSG00000095261;ENSG00000100906;ENSG00000099341;ENSG00000100902;ENSG00000100804;ENSG00000108671;ENSG00000185627;ENSG00000101182;ENSG00000100567;ENSG00000277791;ENSG00000067182;ENSG00000015475;ENSG00000142507;ENSG00000104312	65 (67)	2.02e-06	0.000316	0		0 (0)	1	1	2.02e-06	0.000316
964	Zinc	ZnO NP-NM110 24h	Down	Proteasome Degradation	Wikipathways	18	ENSG00000205220;ENSG00000165916;ENSG00000013275;ENSG00000118705;ENSG00000185627;ENSG00000173692;ENSG00000170315;ENSG00000095261;ENSG00000163902;ENSG00000099341;ENSG00000100567;ENSG00000131467;ENSG00000100902;ENSG00000101182;ENSG00000277791;ENSG00000100804;ENSG00000142507;ENSG00000108671	62 (64)	4.17e-06	0.000592	0		0 (1)	1	1	4.17e-06	0.000592
965	Zinc	ZnO NP-NM110 24h	Down	TLR NFkB	INOH	19	ENSG00000170458;ENSG00000115594;ENSG00000205220;ENSG00000165916;ENSG00000172936;ENSG00000013275;ENSG00000100902;ENSG00000173692;ENSG00000095261;ENSG00000100906;ENSG00000099341;ENSG00000100567;ENSG00000108671;ENSG00000185627;ENSG00000101182;ENSG00000104825;ENSG00000277791;ENSG00000100804;ENSG00000142507	68 (70)	4.25e-06	0.000592	0		0 (1)	1	1	4.25e-06	0.000592
966	Zinc	ZnO NP-NM110 24h	Down	Signaling by RAS mutants	Reactome	13	ENSG00000171560;ENSG00000171564;ENSG00000133703;ENSG00000089220;ENSG00000167085;ENSG00000115414;ENSG00000149970;ENSG00000127314;ENSG00000137486;ENSG00000171557;ENSG00000102882;ENSG00000197122;ENSG00000171435	35 (37)	4.46e-06	0.000602	0		0 (8)	1	1	4.46e-06	0.000602
967	Zinc	ZnO NP-NM110 24h	Down	Urea cycle and metabolism of arginine_ proline_ glutamate_ aspartate and asparagine	EHMN	19	ENSG00000143198;ENSG00000103356;ENSG00000116771;ENSG00000023909;ENSG00000059573;ENSG00000185624;ENSG00000155561;ENSG00000111275;ENSG00000104687;ENSG00000030066;ENSG00000125166;ENSG00000095319;ENSG00000102900;ENSG00000132182;ENSG00000148672;ENSG00000108559;ENSG00000021826;ENSG00000125450;ENSG00000163002	89 (105)	0.000241	0.0114	15	HMDB00056;HMDB00641;HMDB01049;HMDB00812;HMDB06483;HMDB00148;HMDB00208;HMDB01369;HMDB02234;HMDB00078;HMDB06556;HMDB00191;HMDB00161;HMDB00125;HMDB00267	43 (125)	0.00245	0.338	9.06e-06	0.000778
968	Zinc	ZnO NP-NM110 24h	Down	Lysosomal Acid Lipase Deficiency (Wolman Disease)	SMPDB	11	ENSG00000052802;ENSG00000132196;ENSG00000120437;ENSG00000057252;ENSG00000079459;ENSG00000160752;ENSG00000167508;ENSG00000116133;ENSG00000147155;ENSG00000001630;ENSG00000112972	22 (22)	7.08e-07	0.000122	0		4 (46)	1	1	1.07e-05	0.000778
969	Zinc	ZnO NP-NM110 24h	Down	Simvastatin Action Pathway	SMPDB	11	ENSG00000052802;ENSG00000132196;ENSG00000120437;ENSG00000057252;ENSG00000079459;ENSG00000160752;ENSG00000167508;ENSG00000116133;ENSG00000147155;ENSG00000001630;ENSG00000112972	22 (22)	7.08e-07	0.000122	0		4 (47)	1	1	1.07e-05	0.000778
970	Zinc	ZnO NP-NM110 24h	Down	Pravastatin Action Pathway	SMPDB	11	ENSG00000052802;ENSG00000132196;ENSG00000120437;ENSG00000057252;ENSG00000079459;ENSG00000160752;ENSG00000167508;ENSG00000116133;ENSG00000147155;ENSG00000001630;ENSG00000112972	22 (22)	7.08e-07	0.000122	0		4 (47)	1	1	1.07e-05	0.000778
971	Zinc	ZnO NP-NM110 24h	Down	Atorvastatin Action Pathway	SMPDB	11	ENSG00000052802;ENSG00000132196;ENSG00000120437;ENSG00000057252;ENSG00000079459;ENSG00000160752;ENSG00000167508;ENSG00000116133;ENSG00000147155;ENSG00000001630;ENSG00000112972	22 (22)	7.08e-07	0.000122	0		4 (47)	1	1	1.07e-05	0.000778
972	Zinc	ZnO NP-NM110 24h	Down	Hyper-IgD syndrome	SMPDB	11	ENSG00000052802;ENSG00000132196;ENSG00000120437;ENSG00000057252;ENSG00000079459;ENSG00000160752;ENSG00000167508;ENSG00000116133;ENSG00000147155;ENSG00000001630;ENSG00000112972	22 (22)	7.08e-07	0.000122	0		4 (46)	1	1	1.07e-05	0.000778
973	Zinc	ZnO NP-NM110 24h	Down	Cholesteryl ester storage disease	SMPDB	11	ENSG00000052802;ENSG00000132196;ENSG00000120437;ENSG00000057252;ENSG00000079459;ENSG00000160752;ENSG00000167508;ENSG00000116133;ENSG00000147155;ENSG00000001630;ENSG00000112972	22 (22)	7.08e-07	0.000122	0		4 (46)	1	1	1.07e-05	0.000778
974	Zinc	ZnO NP-NM110 24h	Down	Cerivastatin Action Pathway	SMPDB	11	ENSG00000052802;ENSG00000132196;ENSG00000120437;ENSG00000057252;ENSG00000079459;ENSG00000160752;ENSG00000167508;ENSG00000116133;ENSG00000147155;ENSG00000001630;ENSG00000112972	22 (22)	7.08e-07	0.000122	0		4 (47)	1	1	1.07e-05	0.000778
975	Zinc	ZnO NP-NM110 24h	Down	Alendronate Action Pathway	SMPDB	11	ENSG00000052802;ENSG00000132196;ENSG00000120437;ENSG00000057252;ENSG00000079459;ENSG00000160752;ENSG00000167508;ENSG00000116133;ENSG00000147155;ENSG00000001630;ENSG00000112972	22 (22)	7.08e-07	0.000122	0		4 (47)	1	1	1.07e-05	0.000778
976	Zinc	ZnO NP-NM110 24h	Down	Rosuvastatin Action Pathway	SMPDB	11	ENSG00000052802;ENSG00000132196;ENSG00000120437;ENSG00000057252;ENSG00000079459;ENSG00000160752;ENSG00000167508;ENSG00000116133;ENSG00000147155;ENSG00000001630;ENSG00000112972	22 (22)	7.08e-07	0.000122	0		4 (47)	1	1	1.07e-05	0.000778
977	Zinc	ZnO NP-NM110 24h	Down	Lovastatin Action Pathway	SMPDB	11	ENSG00000052802;ENSG00000132196;ENSG00000120437;ENSG00000057252;ENSG00000079459;ENSG00000160752;ENSG00000167508;ENSG00000116133;ENSG00000147155;ENSG00000001630;ENSG00000112972	22 (22)	7.08e-07	0.000122	0		4 (47)	1	1	1.07e-05	0.000778
978	Zinc	ZnO NP-NM110 24h	Down	Mevalonic aciduria	SMPDB	11	ENSG00000052802;ENSG00000132196;ENSG00000120437;ENSG00000057252;ENSG00000079459;ENSG00000160752;ENSG00000167508;ENSG00000116133;ENSG00000147155;ENSG00000001630;ENSG00000112972	22 (22)	7.08e-07	0.000122	0		4 (46)	1	1	1.07e-05	0.000778
979	Zinc	ZnO NP-NM110 24h	Down	Wolman disease	SMPDB	11	ENSG00000052802;ENSG00000132196;ENSG00000120437;ENSG00000057252;ENSG00000079459;ENSG00000160752;ENSG00000167508;ENSG00000116133;ENSG00000147155;ENSG00000001630;ENSG00000112972	22 (22)	7.08e-07	0.000122	0		4 (46)	1	1	1.07e-05	0.000778
980	Zinc	ZnO NP-NM110 24h	Down	Risedronate Action Pathway	SMPDB	11	ENSG00000052802;ENSG00000132196;ENSG00000120437;ENSG00000057252;ENSG00000079459;ENSG00000160752;ENSG00000167508;ENSG00000116133;ENSG00000147155;ENSG00000001630;ENSG00000112972	22 (22)	7.08e-07	0.000122	0		4 (47)	1	1	1.07e-05	0.000778
981	Zinc	ZnO NP-NM110 24h	Down	Pamidronate Action Pathway	SMPDB	11	ENSG00000052802;ENSG00000132196;ENSG00000120437;ENSG00000057252;ENSG00000079459;ENSG00000160752;ENSG00000167508;ENSG00000116133;ENSG00000147155;ENSG00000001630;ENSG00000112972	22 (22)	7.08e-07	0.000122	0		4 (47)	1	1	1.07e-05	0.000778
982	Zinc	ZnO NP-NM110 24h	Down	Fluvastatin Action Pathway	SMPDB	11	ENSG00000052802;ENSG00000132196;ENSG00000120437;ENSG00000057252;ENSG00000079459;ENSG00000160752;ENSG00000167508;ENSG00000116133;ENSG00000147155;ENSG00000001630;ENSG00000112972	22 (22)	7.08e-07	0.000122	0		4 (47)	1	1	1.07e-05	0.000778
983	Zinc	ZnO NP-NM110 24h	Down	Smith-Lemli-Opitz Syndrome (SLOS)	SMPDB	11	ENSG00000052802;ENSG00000132196;ENSG00000120437;ENSG00000057252;ENSG00000079459;ENSG00000160752;ENSG00000167508;ENSG00000116133;ENSG00000147155;ENSG00000001630;ENSG00000112972	22 (22)	7.08e-07	0.000122	0		4 (46)	1	1	1.07e-05	0.000778
984	Zinc	ZnO NP-NM110 24h	Down	Chondrodysplasia Punctata II_ X Linked Dominant (CDPX2)	SMPDB	11	ENSG00000052802;ENSG00000132196;ENSG00000120437;ENSG00000057252;ENSG00000079459;ENSG00000160752;ENSG00000167508;ENSG00000116133;ENSG00000147155;ENSG00000001630;ENSG00000112972	22 (22)	7.08e-07	0.000122	0		4 (46)	1	1	1.07e-05	0.000778
985	Zinc	ZnO NP-NM110 24h	Down	CHILD Syndrome	SMPDB	11	ENSG00000052802;ENSG00000132196;ENSG00000120437;ENSG00000057252;ENSG00000079459;ENSG00000160752;ENSG00000167508;ENSG00000116133;ENSG00000147155;ENSG00000001630;ENSG00000112972	22 (22)	7.08e-07	0.000122	0		4 (46)	1	1	1.07e-05	0.000778
986	Zinc	ZnO NP-NM110 24h	Down	Desmosterolosis	SMPDB	11	ENSG00000052802;ENSG00000132196;ENSG00000120437;ENSG00000057252;ENSG00000079459;ENSG00000160752;ENSG00000167508;ENSG00000116133;ENSG00000147155;ENSG00000001630;ENSG00000112972	22 (22)	7.08e-07	0.000122	0		4 (46)	1	1	1.07e-05	0.000778
987	Zinc	ZnO NP-NM110 24h	Down	Hypercholesterolemia	SMPDB	11	ENSG00000052802;ENSG00000132196;ENSG00000120437;ENSG00000057252;ENSG00000079459;ENSG00000160752;ENSG00000167508;ENSG00000116133;ENSG00000147155;ENSG00000001630;ENSG00000112972	22 (22)	7.08e-07	0.000122	0		4 (46)	1	1	1.07e-05	0.000778
988	Zinc	ZnO NP-NM110 24h	Down	Steroid Biosynthesis	SMPDB	11	ENSG00000052802;ENSG00000132196;ENSG00000120437;ENSG00000057252;ENSG00000079459;ENSG00000160752;ENSG00000167508;ENSG00000116133;ENSG00000147155;ENSG00000001630;ENSG00000112972	22 (22)	7.08e-07	0.000122	0		4 (46)	1	1	1.07e-05	0.000778
989	Zinc	ZnO NP-NM110 24h	Down	Zoledronate Action Pathway	SMPDB	11	ENSG00000052802;ENSG00000132196;ENSG00000120437;ENSG00000057252;ENSG00000079459;ENSG00000160752;ENSG00000167508;ENSG00000116133;ENSG00000147155;ENSG00000001630;ENSG00000112972	22 (22)	7.08e-07	0.000122	0		4 (47)	1	1	1.07e-05	0.000778
990	Zinc	ZnO NP-NM110 24h	Down	Ibandronate Action Pathway	SMPDB	11	ENSG00000052802;ENSG00000132196;ENSG00000120437;ENSG00000057252;ENSG00000079459;ENSG00000160752;ENSG00000167508;ENSG00000116133;ENSG00000147155;ENSG00000001630;ENSG00000112972	22 (22)	7.08e-07	0.000122	0		4 (46)	1	1	1.07e-05	0.000778
991	Zinc	ZnO NP-NM110 24h	Down	IL-1 NFkB	INOH	18	ENSG00000115594;ENSG00000205220;ENSG00000165916;ENSG00000172936;ENSG00000013275;ENSG00000100902;ENSG00000173692;ENSG00000095261;ENSG00000100906;ENSG00000099341;ENSG00000100567;ENSG00000108671;ENSG00000185627;ENSG00000101182;ENSG00000104825;ENSG00000277791;ENSG00000100804;ENSG00000142507	64 (65)	6.85e-06	0.00087	0		0 (0)	1	1	6.85e-06	0.00087
992	Zinc	ZnO NP-NM110 24h	Down	NRF2 pathway	Wikipathways	25	ENSG00000160211;ENSG00000090013;ENSG00000132002;ENSG00000125257;ENSG00000143198;ENSG00000023909;ENSG00000160326;ENSG00000138074;ENSG00000138821;ENSG00000117450;ENSG00000176153;ENSG00000087086;ENSG00000080824;ENSG00000104635;ENSG00000196950;ENSG00000204389;ENSG00000159228;ENSG00000142657;ENSG00000065833;ENSG00000117592;ENSG00000100031;ENSG00000104687;ENSG00000198848;ENSG00000096384;ENSG00000136810	110 (142)	8.44e-06	0.000985	0		0 (1)	1	1	8.44e-06	0.000985
993	Zinc	ZnO NP-NM110 24h	Down	Signaling by moderate kinase activity BRAF mutants	Reactome	13	ENSG00000171560;ENSG00000171564;ENSG00000133703;ENSG00000089220;ENSG00000167085;ENSG00000115414;ENSG00000149970;ENSG00000127314;ENSG00000137486;ENSG00000171557;ENSG00000102882;ENSG00000197122;ENSG00000171435	37 (39)	9.1e-06	0.00101	0		0 (8)	1	1	9.1e-06	0.00101
994	Zinc	ZnO NP-NM110 24h	Down	Paradoxical activation of RAF signaling by kinase inactive BRAF	Reactome	13	ENSG00000171560;ENSG00000171564;ENSG00000133703;ENSG00000089220;ENSG00000167085;ENSG00000115414;ENSG00000149970;ENSG00000127314;ENSG00000137486;ENSG00000171557;ENSG00000102882;ENSG00000197122;ENSG00000171435	37 (39)	9.1e-06	0.00101	0		0 (9)	1	1	9.1e-06	0.00101
995	Zinc	ZnO NP-NM110 24h	Down	Acetaminophen Metabolism Pathway	SMPDB	10	ENSG00000155660;ENSG00000125257;ENSG00000128228;ENSG00000103222;ENSG00000044574;ENSG00000090520;ENSG00000213648;ENSG00000143870;ENSG00000118777;ENSG00000149428	24 (31)	1.77e-05	0.00173	2	HMDB01859;HMDB00125	3 (16)	0.0778	1	1.99e-05	0.00139
996	Zinc	ZnO NP-NM110 24h	Down	Signaling by high-kinase activity BRAF mutants	Reactome	12	ENSG00000171560;ENSG00000171564;ENSG00000133703;ENSG00000089220;ENSG00000115414;ENSG00000149970;ENSG00000127314;ENSG00000137486;ENSG00000171557;ENSG00000102882;ENSG00000197122;ENSG00000171435	33 (35)	1.34e-05	0.00141	0		0 (11)	1	1	1.34e-05	0.00141
997	Zinc	ZnO NP-NM110 24h	Down	Protein processing in endoplasmic reticulum - Homo sapiens (human)	KEGG	31	ENSG00000155660;ENSG00000109846;ENSG00000102580;ENSG00000138073;ENSG00000132002;ENSG00000090520;ENSG00000150961;ENSG00000143870;ENSG00000149428;ENSG00000239264;ENSG00000136986;ENSG00000163902;ENSG00000118705;ENSG00000185624;ENSG00000179218;ENSG00000136731;ENSG00000162909;ENSG00000100219;ENSG00000133265;ENSG00000136026;ENSG00000058262;ENSG00000204388;ENSG00000204389;ENSG00000044574;ENSG00000244038…	156 (166)	1.39e-05	0.00141	0		0 (6)	1	1	1.39e-05	0.00141
998	Zinc	ZnO NP-NM110 24h	Down	DroToll-like	INOH	17	ENSG00000143801;ENSG00000205220;ENSG00000165916;ENSG00000013275;ENSG00000100902;ENSG00000173692;ENSG00000168487;ENSG00000095261;ENSG00000099341;ENSG00000151694;ENSG00000108671;ENSG00000185627;ENSG00000101182;ENSG00000100567;ENSG00000277791;ENSG00000100804;ENSG00000142507	61 (65)	1.41e-05	0.00141	0		0 (1)	1	1	1.41e-05	0.00141
999	Zinc	ZnO NP-NM110 24h	Down	Methionine and cysteine metabolism	EHMN	16	ENSG00000128309;ENSG00000167703;ENSG00000132182;ENSG00000174502;ENSG00000047457;ENSG00000030066;ENSG00000168003;ENSG00000004864;ENSG00000125166;ENSG00000095319;ENSG00000102900;ENSG00000163002;ENSG00000108559;ENSG00000155561;ENSG00000125450;ENSG00000101444	72 (80)	0.000456	0.0193	9	HMDB00641;HMDB00156;HMDB00251;HMDB11745;HMDB00965;HMDB00148;HMDB00208;HMDB00191;HMDB00161	21 (80)	0.00423	0.456	2.73e-05	0.00177
1000	Zinc	ZnO NP-NM110 24h	Down	Putative anti-Inflammatory metabolites formation from EPA	EHMN	12	ENSG00000143819;ENSG00000110958;ENSG00000159228;ENSG00000030066;ENSG00000186529;ENSG00000132182;ENSG00000095319;ENSG00000102900;ENSG00000163002;ENSG00000155561;ENSG00000125450;ENSG00000108559	38 (42)	6.77e-05	0.00471	2	HMDB00125;HMDB00148	2 (10)	0.0292	1	2.79e-05	0.00177
1001	Zinc	ZnO NP-NM110 24h	Down	Cholesterol biosynthesis	Reactome	11	ENSG00000052802;ENSG00000132196;ENSG00000120437;ENSG00000079459;ENSG00000160752;ENSG00000167508;ENSG00000116133;ENSG00000147155;ENSG00000001630;ENSG00000112972;ENSG00000172893	24 (24)	2.12e-06	0.000316	0		3 (45)	1	1	2.98e-05	0.00177
1002	Zinc	ZnO NP-NM110 24h	Down	superpathway of cholesterol biosynthesis	HumanCyc	11	ENSG00000052802;ENSG00000132196;ENSG00000120437;ENSG00000079459;ENSG00000160752;ENSG00000167508;ENSG00000116133;ENSG00000147155;ENSG00000001630;ENSG00000112972;ENSG00000172893	24 (25)	2.12e-06	0.000316	0		3 (62)	1	1	2.98e-05	0.00177
1003	Zinc	ZnO NP-NM110 24h	Down	Sterol Regulatory Element-Binding Proteins (SREBP) signalling	Wikipathways	18	ENSG00000072310;ENSG00000134324;ENSG00000099194;ENSG00000278540;ENSG00000130164;ENSG00000079459;ENSG00000150961;ENSG00000160752;ENSG00000169710;ENSG00000154930;ENSG00000112972;ENSG00000073060;ENSG00000100934;ENSG00000001630;ENSG00000157020;ENSG00000108424;ENSG00000138207;ENSG00000167508	64 (68)	6.85e-06	0.00087	1	HMDB00641	2 (5)	0.314	1	3.03e-05	0.00177
1004	Zinc	ZnO NP-NM110 24h	Down	Metabolism of lipids and lipoproteins	Reactome	80	ENSG00000126821;ENSG00000152642;ENSG00000115159;ENSG00000070214;ENSG00000135245;ENSG00000134324;ENSG00000168487;ENSG00000103222;ENSG00000227471;ENSG00000168389;ENSG00000149485;ENSG00000169710;ENSG00000079459;ENSG00000132196;ENSG00000135454;ENSG00000198610;ENSG00000165389;ENSG00000070882;ENSG00000101846;ENSG00000006756;ENSG00000278540;ENSG00000183020;ENSG00000131238;ENSG00000087253;ENSG00000141934…	580 (728)	3.41e-05	0.00301	15	HMDB00094;HMDB00156;HMDB01895;HMDB07101;HMDB07214;HMDB07129;HMDB00251;HMDB08956;HMDB05780;HMDB09054;HMDB09052;HMDB08828;HMDB08987;HMDB08859;HMDB09219;HMDB08924;HMDB08894;HMDB08899;HMDB00271;HMDB01372;HMDB00148;HMDB00500;HMDB00564;HMDB08031;HMDB07871;HMDB07901;HMDB07902;HMDB07998;HMDB07870;HMDB07933;HMDB07966;HMDB01874;HMDB00193;HMDB00208;HMDB00125	60 (525)	0.0658	1	3.15e-05	0.00178
1005	Zinc	ZnO NP-NM110 24h	Down	Metabolism of carbohydrates	Reactome	42	ENSG00000063660;ENSG00000105220;ENSG00000067177;ENSG00000257335;ENSG00000137713;ENSG00000102900;ENSG00000170525;ENSG00000156515;ENSG00000030066;ENSG00000013288;ENSG00000125450;ENSG00000198668;ENSG00000163931;ENSG00000004864;ENSG00000132182;ENSG00000171314;ENSG00000108559;ENSG00000158470;ENSG00000162040;ENSG00000100994;ENSG00000008513;ENSG00000110080;ENSG00000095319;ENSG00000165092;ENSG00000198682…	235 (288)	7.62e-06	0.00094	6	HMDB00094;HMDB00156;HMDB01372;HMDB00148;HMDB00208;HMDB00191	30 (144)	0.413	1	4.3e-05	0.00236
1006	Zinc	ZnO NP-NM110 24h	Down	Glutathione metabolism	Wikipathways	6	ENSG00000023909;ENSG00000160211;ENSG00000100031;ENSG00000104687;ENSG00000138413;ENSG00000176153	16 (20)	0.00176	0.0461	5	HMDB00125;HMDB00078;HMDB01049;HMDB00148;HMDB00267	7 (19)	0.00211	0.319	5.01e-05	0.00267
1007	Zinc	ZnO NP-NM110 24h	Down	Glutaminolysis and Cancer	SMPDB	6	ENSG00000155465;ENSG00000163541;ENSG00000065833;ENSG00000125166;ENSG00000062485;ENSG00000148672	36 (37)	0.0945	0.502	10	HMDB00094;HMDB00641;HMDB00156;HMDB00190;HMDB01372;HMDB00148;HMDB00208;HMDB00193;HMDB00191;HMDB00161	16 (44)	4.41e-05	0.0879	5.58e-05	0.00289
1008	Zinc	ZnO NP-NM110 24h	Down	Amino Acid metabolism	Wikipathways	18	ENSG00000163541;ENSG00000116649;ENSG00000128309;ENSG00000059573;ENSG00000023909;ENSG00000132437;ENSG00000021826;ENSG00000196305;ENSG00000104687;ENSG00000154930;ENSG00000125166;ENSG00000062485;ENSG00000165092;ENSG00000138413;ENSG00000148672;ENSG00000204394;ENSG00000140105;ENSG00000130707	75 (91)	7.14e-05	0.00474	11	HMDB00094;HMDB00641;HMDB00156;HMDB01049;HMDB00190;HMDB00148;HMDB00208;HMDB00193;HMDB00191;HMDB00161;HMDB00125	40 (108)	0.061	1	5.81e-05	0.00292
1009	Zinc	ZnO NP-NM110 24h	Down	Notch	INOH	19	ENSG00000143801;ENSG00000184916;ENSG00000205220;ENSG00000065526;ENSG00000165916;ENSG00000013275;ENSG00000100902;ENSG00000173692;ENSG00000095261;ENSG00000099341;ENSG00000151694;ENSG00000108671;ENSG00000101384;ENSG00000185627;ENSG00000101182;ENSG00000100567;ENSG00000277791;ENSG00000100804;ENSG00000142507	78 (79)	3.63e-05	0.00301	0		0 (0)	1	1	3.63e-05	0.00301
1010	Zinc	ZnO NP-NM110 24h	Down	Regulation of cholesterol biosynthesis by SREBP (SREBF)	Reactome	11	ENSG00000072310;ENSG00000167508;ENSG00000079459;ENSG00000099194;ENSG00000160752;ENSG00000169710;ENSG00000172893;ENSG00000001630;ENSG00000108424;ENSG00000112972;ENSG00000170522	31 (31)	4.03e-05	0.00319	0		0 (1)	1	1	4.03e-05	0.00319
1011	Zinc	ZnO NP-NM110 24h	Down	Activation of gene expression by SREBF (SREBP)	Reactome	10	ENSG00000072310;ENSG00000079459;ENSG00000099194;ENSG00000160752;ENSG00000169710;ENSG00000170522;ENSG00000172893;ENSG00000001630;ENSG00000112972;ENSG00000167508	26 (26)	4.06e-05	0.00319	0		0 (0)	1	1	4.06e-05	0.00319
1012	Zinc	ZnO NP-NM110 24h	Down	cholesterol biosynthesis II (via 24_25-dihydrolanosterol)	HumanCyc	7	ENSG00000052802;ENSG00000132196;ENSG00000079459;ENSG00000172893;ENSG00000116133;ENSG00000147155;ENSG00000001630	13 (13)	4.48e-05	0.00334	0		0 (32)	1	1	4.48e-05	0.00334
1013	Zinc	ZnO NP-NM110 24h	Down	cholesterol biosynthesis III (via desmosterol)	HumanCyc	7	ENSG00000052802;ENSG00000132196;ENSG00000079459;ENSG00000172893;ENSG00000116133;ENSG00000147155;ENSG00000001630	13 (13)	4.48e-05	0.00334	0		0 (32)	1	1	4.48e-05	0.00334
1014	Zinc	ZnO NP-NM110 24h	Down	cholesterol biosynthesis I	HumanCyc	7	ENSG00000052802;ENSG00000132196;ENSG00000079459;ENSG00000172893;ENSG00000116133;ENSG00000147155;ENSG00000001630	13 (13)	4.48e-05	0.00334	0		0 (32)	1	1	4.48e-05	0.00334
1015	Zinc	ZnO NP-NM110 24h	Down	Warburg Effect	SMPDB	10	ENSG00000163541;ENSG00000105220;ENSG00000074800;ENSG00000177156;ENSG00000142657;ENSG00000160211;ENSG00000163931;ENSG00000062485;ENSG00000138413;ENSG00000148672	41 (45)	0.00252	0.0597	8	HMDB00094;HMDB00641;HMDB00156;HMDB00190;HMDB01372;HMDB00148;HMDB00208;HMDB00193	16 (58)	0.00216	0.319	7.13e-05	0.00349
1016	Zinc	ZnO NP-NM110 24h	Down	MAP2K and MAPK activation	Reactome	12	ENSG00000171560;ENSG00000171564;ENSG00000133703;ENSG00000089220;ENSG00000115414;ENSG00000149970;ENSG00000127314;ENSG00000137486;ENSG00000171557;ENSG00000102882;ENSG00000197122;ENSG00000171435	37 (39)	5.03e-05	0.00368	0		0 (8)	1	1	5.03e-05	0.00368
1017	Zinc	ZnO NP-NM110 24h	Down	Glycolysis and Gluconeogenesis	EHMN	16	ENSG00000111275;ENSG00000062485;ENSG00000105220;ENSG00000074800;ENSG00000132182;ENSG00000065833;ENSG00000030066;ENSG00000154930;ENSG00000095319;ENSG00000102900;ENSG00000163002;ENSG00000156515;ENSG00000171314;ENSG00000155561;ENSG00000125450;ENSG00000108559	59 (68)	3.63e-05	0.00301	4	HMDB00094;HMDB00190;HMDB00156;HMDB01372	13 (52)	0.169	1	7.97e-05	0.0038
1018	Zinc	ZnO NP-NM110 24h	Down	D-Glutamine and D-glutamate metabolism - Homo sapiens (human)	KEGG	1	ENSG00000148672	4 (4)	0.31	0.81	6	HMDB00641;HMDB00805;HMDB00148;HMDB00208;HMDB03423;HMDB03339	6 (12)	2.18e-05	0.087	8.74e-05	0.00406
1019	Zinc	ZnO NP-NM110 24h	Down	TLR JNK	INOH	16	ENSG00000170458;ENSG00000205220;ENSG00000165916;ENSG00000172936;ENSG00000013275;ENSG00000100902;ENSG00000173692;ENSG00000095261;ENSG00000099341;ENSG00000100567;ENSG00000108671;ENSG00000185627;ENSG00000101182;ENSG00000277791;ENSG00000100804;ENSG00000142507	61 (63)	5.67e-05	0.00408	0		0 (1)	1	1	5.67e-05	0.00408
1020	Zinc	ZnO NP-NM110 24h	Down	Metabolism of vitamins and cofactors	Reactome	27	ENSG00000063660;ENSG00000164933;ENSG00000103222;ENSG00000130164;ENSG00000169710;ENSG00000105835;ENSG00000278540;ENSG00000197324;ENSG00000072042;ENSG00000100714;ENSG00000136877;ENSG00000228716;ENSG00000198074;ENSG00000138074;ENSG00000138207;ENSG00000135917;ENSG00000196139;ENSG00000176974;ENSG00000198610;ENSG00000089057;ENSG00000170482;ENSG00000187134;ENSG00000115884;ENSG00000163382;ENSG00000132763…	133 (164)	3.33e-05	0.00301	7	HMDB00641;HMDB07101;HMDB07214;HMDB07129;HMDB00190;HMDB01372;HMDB00148;HMDB00161;HMDB00125	30 (155)	0.242	1	0.000102	0.00459
1021	Zinc	ZnO NP-NM110 24h	Down	Influenza Life Cycle	Reactome	16	ENSG00000177700;ENSG00000102978;ENSG00000204389;ENSG00000132182;ENSG00000179218;ENSG00000108424;ENSG00000080824;ENSG00000105258;ENSG00000095319;ENSG00000102900;ENSG00000163002;ENSG00000030066;ENSG00000114030;ENSG00000155561;ENSG00000125450;ENSG00000108559	53 (53)	8.16e-06	0.00098	0		1 (9)	1	1	0.000104	0.00459
1022	Zinc	ZnO NP-NM110 24h	Down	TLR p38	INOH	16	ENSG00000170458;ENSG00000205220;ENSG00000165916;ENSG00000172936;ENSG00000013275;ENSG00000100902;ENSG00000173692;ENSG00000095261;ENSG00000099341;ENSG00000100567;ENSG00000108671;ENSG00000185627;ENSG00000101182;ENSG00000277791;ENSG00000100804;ENSG00000142507	62 (64)	7.02e-05	0.00474	0		0 (1)	1	1	7.02e-05	0.00474
1023	Zinc	ZnO NP-NM110 24h	Down	IL-1 JNK	INOH	16	ENSG00000115594;ENSG00000205220;ENSG00000165916;ENSG00000172936;ENSG00000013275;ENSG00000100902;ENSG00000173692;ENSG00000095261;ENSG00000099341;ENSG00000100567;ENSG00000108671;ENSG00000185627;ENSG00000101182;ENSG00000277791;ENSG00000100804;ENSG00000142507	62 (63)	7.02e-05	0.00474	0		0 (0)	1	1	7.02e-05	0.00474
1024	Zinc	ZnO NP-NM110 24h	Down	miR-targeted genes in muscle cell - TarBase	Wikipathways	49	ENSG00000109606;ENSG00000167460;ENSG00000115159;ENSG00000133703;ENSG00000164466;ENSG00000132002;ENSG00000124151;ENSG00000141522;ENSG00000153956;ENSG00000172572;ENSG00000138814;ENSG00000184371;ENSG00000064651;ENSG00000163430;ENSG00000109861;ENSG00000149177;ENSG00000074696;ENSG00000101158;ENSG00000145555;ENSG00000120063;ENSG00000110880;ENSG00000004864;ENSG00000152661;ENSG00000102978;ENSG00000100934…	319 (398)	9e-05	0.00565	0		0 (0)	1	1	9e-05	0.00565
1025	Zinc	ZnO NP-NM110 24h	Down	Retinoid metabolism and transport	Reactome	11	ENSG00000063660;ENSG00000197324;ENSG00000072042;ENSG00000130164;ENSG00000115884;ENSG00000187134;ENSG00000198610;ENSG00000198074;ENSG00000196139;ENSG00000157193;ENSG00000138207	28 (44)	1.31e-05	0.00141	1	HMDB07101;HMDB07214;HMDB07129	9 (32)	0.82	1	0.000134	0.00576
1026	Zinc	ZnO NP-NM110 24h	Down	Prostaglandin formation from dihomo gama-linoleic acid	EHMN	10	ENSG00000132182;ENSG00000110958;ENSG00000159228;ENSG00000030066;ENSG00000095319;ENSG00000102900;ENSG00000163002;ENSG00000155561;ENSG00000125450;ENSG00000108559	29 (31)	0.00012	0.00685	0		0 (8)	1	1	0.00012	0.00685
1027	Zinc	ZnO NP-NM110 24h	Down	snRNP Assembly	Reactome	14	ENSG00000132182;ENSG00000082516;ENSG00000100028;ENSG00000116455;ENSG00000125835;ENSG00000179409;ENSG00000030066;ENSG00000100462;ENSG00000095319;ENSG00000102900;ENSG00000163002;ENSG00000155561;ENSG00000125450;ENSG00000108559	52 (52)	0.000121	0.00685	0		0 (4)	1	1	0.000121	0.00685
1028	Zinc	ZnO NP-NM110 24h	Down	Metabolism of non-coding RNA	Reactome	14	ENSG00000132182;ENSG00000082516;ENSG00000100028;ENSG00000116455;ENSG00000125835;ENSG00000179409;ENSG00000030066;ENSG00000100462;ENSG00000095319;ENSG00000102900;ENSG00000163002;ENSG00000155561;ENSG00000125450;ENSG00000108559	52 (52)	0.000121	0.00685	0		0 (4)	1	1	0.000121	0.00685
1029	Zinc	ZnO NP-NM110 24h	Down	proteasome complex	BioCarta	9	ENSG00000163902;ENSG00000118705;ENSG00000100567;ENSG00000108671;ENSG00000100902;ENSG00000101182;ENSG00000277791;ENSG00000100804;ENSG00000142507	24 (24)	0.000125	0.00693	0		0 (2)	1	1	0.000125	0.00693
1030	Zinc	ZnO NP-NM110 24h	Down	Sorafenib Metabolism Pathway	SMPDB	6	ENSG00000155660;ENSG00000128228;ENSG00000044574;ENSG00000090520;ENSG00000143870;ENSG00000149428	11 (15)	0.00015	0.00782	0		0 (7)	1	1	0.00015	0.00782
1031	Zinc	ZnO NP-NM110 24h	Down	O-linked glycosylation of mucins	Reactome	14	ENSG00000073849;ENSG00000173702;ENSG00000215182;ENSG00000156966;ENSG00000164574;ENSG00000008513;ENSG00000110080;ENSG00000257594;ENSG00000158470;ENSG00000117983;ENSG00000143641;ENSG00000179913;ENSG00000140297;ENSG00000259075	53 (68)	0.000151	0.00782	0		0 (8)	1	1	0.000151	0.00782
1032	Zinc	ZnO NP-NM110 24h	Down	IL-1 p38	INOH	16	ENSG00000115594;ENSG00000205220;ENSG00000165916;ENSG00000172936;ENSG00000013275;ENSG00000100902;ENSG00000173692;ENSG00000095261;ENSG00000099341;ENSG00000100567;ENSG00000108671;ENSG00000185627;ENSG00000101182;ENSG00000277791;ENSG00000100804;ENSG00000142507	66 (67)	0.000157	0.00788	0		0 (0)	1	1	0.000157	0.00788
1033	Zinc	ZnO NP-NM110 24h	Down	Transport of Ribonucleoproteins into the Host Nucleus	Reactome	10	ENSG00000132182;ENSG00000108424;ENSG00000095319;ENSG00000102900;ENSG00000163002;ENSG00000030066;ENSG00000114030;ENSG00000155561;ENSG00000125450;ENSG00000108559	30 (30)	0.000165	0.00821	0		0 (0)	1	1	0.000165	0.00821
1034	Zinc	ZnO NP-NM110 24h	Down	One carbon metabolism and related pathways	Wikipathways	8	ENSG00000111666;ENSG00000176974;ENSG00000023909;ENSG00000168710;ENSG00000104687;ENSG00000112096;ENSG00000176153;ENSG00000106976	41 (49)	0.0255	0.246	9	HMDB01049;HMDB00251;HMDB08956;HMDB05780;HMDB09054;HMDB09052;HMDB08828;HMDB08987;HMDB08859;HMDB09219;HMDB08924;HMDB08894;HMDB08899;HMDB00965;HMDB00564;HMDB08031;HMDB07871;HMDB07901;HMDB07902;HMDB07998;HMDB07870;HMDB07933;HMDB07966;HMDB03339;HMDB00125;HMDB00271;HMDB00267	17 (37)	0.000638	0.213	0.000195	0.00823
1035	Zinc	ZnO NP-NM110 24h	Down	Oncogenic MAPK signaling	Reactome	15	ENSG00000153094;ENSG00000171560;ENSG00000171564;ENSG00000133703;ENSG00000089220;ENSG00000105939;ENSG00000115414;ENSG00000137486;ENSG00000149970;ENSG00000127314;ENSG00000171557;ENSG00000197122;ENSG00000102882;ENSG00000167085;ENSG00000171435	60 (64)	0.000173	0.0085	0		0 (11)	1	1	0.000173	0.0085
1036	Zinc	ZnO NP-NM110 24h	Down	Nuclear Receptors Meta-Pathway	Wikipathways	40	ENSG00000090013;ENSG00000069702;ENSG00000124151;ENSG00000163993;ENSG00000130522;ENSG00000125257;ENSG00000169710;ENSG00000143198;ENSG00000095203;ENSG00000198848;ENSG00000160326;ENSG00000099194;ENSG00000138074;ENSG00000132002;ENSG00000117592;ENSG00000197122;ENSG00000117450;ENSG00000176153;ENSG00000072310;ENSG00000136802;ENSG00000108691;ENSG00000103257;ENSG00000087086;ENSG00000080824;ENSG00000186204…	251 (316)	0.000179	0.00867	0		0 (0)	1	1	0.000179	0.00867
1037	Zinc	ZnO NP-NM110 24h	Down	miR-targeted genes in lymphocytes - TarBase	Wikipathways	57	ENSG00000164466;ENSG00000167460;ENSG00000115159;ENSG00000133703;ENSG00000109606;ENSG00000132002;ENSG00000124151;ENSG00000141522;ENSG00000153956;ENSG00000172572;ENSG00000149485;ENSG00000138814;ENSG00000221823;ENSG00000011485;ENSG00000109861;ENSG00000149177;ENSG00000167552;ENSG00000074696;ENSG00000101158;ENSG00000145555;ENSG00000120063;ENSG00000278619;ENSG00000110880;ENSG00000004864;ENSG00000102978…	399 (486)	0.000187	0.00899	0		0 (0)	1	1	0.000187	0.00899
1038	Zinc	ZnO NP-NM110 24h	Down	B cell receptor signaling	INOH	19	ENSG00000102882;ENSG00000133703;ENSG00000165916;ENSG00000013275;ENSG00000185627;ENSG00000173692;ENSG00000095261;ENSG00000101182;ENSG00000099341;ENSG00000205220;ENSG00000100567;ENSG00000108671;ENSG00000100902;ENSG00000100906;ENSG00000104825;ENSG00000197122;ENSG00000277791;ENSG00000100804;ENSG00000142507	84 (134)	0.000107	0.00662	1	HMDB07101;HMDB07214;HMDB07129	1 (7)	0.172	1	0.000219	0.00902
1039	Zinc	ZnO NP-NM110 24h	Down	Post-chaperonin tubulin folding pathway	Reactome	9	ENSG00000105254;ENSG00000167552;ENSG00000123416;ENSG00000176014;ENSG00000127824;ENSG00000188229;ENSG00000137267;ENSG00000243910;ENSG00000141556	20 (23)	2.23e-05	0.00214	0		1 (2)	1	1	0.000261	0.0105
1040	Zinc	ZnO NP-NM110 24h	Down	CD4 T cell receptor signaling	INOH	22	ENSG00000133703;ENSG00000138814;ENSG00000221823;ENSG00000198668;ENSG00000100567;ENSG00000100902;ENSG00000101182;ENSG00000104825;ENSG00000277791;ENSG00000100804;ENSG00000142507;ENSG00000205220;ENSG00000165916;ENSG00000013275;ENSG00000173692;ENSG00000095261;ENSG00000100906;ENSG00000099341;ENSG00000108671;ENSG00000185627;ENSG00000102882;ENSG00000136238	107 (128)	0.000143	0.00765	1	HMDB07101;HMDB07214;HMDB07129	1 (7)	0.172	1	0.000286	0.0113
1041	Zinc	ZnO NP-NM110 24h	Down	Benzo(a)pyrene metabolism	Wikipathways	5	ENSG00000196139;ENSG00000143819;ENSG00000187134;ENSG00000151632;ENSG00000198610	8 (9)	0.000242	0.0114	0		0 (5)	1	1	0.000242	0.0114
1042	Zinc	ZnO NP-NM110 24h	Down	Unwinding of DNA	Reactome	6	ENSG00000131153;ENSG00000073111;ENSG00000112118;ENSG00000100297;ENSG00000076003;ENSG00000093009	12 (12)	0.000277	0.0129	0		0 (0)	1	1	0.000277	0.0129
1043	Zinc	ZnO NP-NM110 24h	Down	Pentose Phosphate Pathway (Erythrocyte)	PharmGKB	4	ENSG00000156515;ENSG00000160211;ENSG00000142657;ENSG00000105220	5 (5)	0.000286	0.0131	0		0 (0)	1	1	0.000286	0.0131
1044	Zinc	ZnO NP-NM110 24h	Down	allopregnanolone biosynthesis	HumanCyc	5	ENSG00000145545;ENSG00000196139;ENSG00000198610;ENSG00000151632;ENSG00000187134	6 (6)	3.02e-05	0.00283	0		1 (8)	1	1	0.000344	0.0133
1045	Zinc	ZnO NP-NM110 24h	Down	Pyrimidine metabolism	EHMN	19	ENSG00000014138;ENSG00000148229;ENSG00000177192;ENSG00000177700;ENSG00000138035;ENSG00000162433;ENSG00000112759;ENSG00000030066;ENSG00000102900;ENSG00000108559;ENSG00000068654;ENSG00000105258;ENSG00000095319;ENSG00000102978;ENSG00000132182;ENSG00000197586;ENSG00000155561;ENSG00000125450;ENSG00000163002	124 (137)	0.0127	0.172	7	HMDB00641;HMDB00056;HMDB02031;HMDB00148;HMDB00218;HMDB00191;HMDB00079	13 (77)	0.00246	0.338	0.000356	0.0133
1046	Zinc	ZnO NP-NM110 24h	Down	Axon guidance	Reactome	58	ENSG00000063660;ENSG00000067560;ENSG00000162434;ENSG00000133703;ENSG00000182580;ENSG00000137713;ENSG00000092964;ENSG00000170315;ENSG00000127314;ENSG00000076864;ENSG00000169242;ENSG00000137486;ENSG00000172602;ENSG00000162302;ENSG00000272398;ENSG00000115414;ENSG00000011485;ENSG00000183020;ENSG00000184347;ENSG00000006125;ENSG00000155366;ENSG00000136040;ENSG00000145555;ENSG00000089220;ENSG00000145349…	405 (487)	0.000154	0.00782	2	HMDB07101;HMDB07214;HMDB07129;HMDB00148	5 (23)	0.206	1	0.00036	0.0133
1047	Zinc	ZnO NP-NM110 24h	Down	Alanine_ aspartate and glutamate metabolism - Homo sapiens (human)	KEGG	6	ENSG00000021826;ENSG00000126522;ENSG00000125166;ENSG00000148672;ENSG00000130707;ENSG00000185100	31 (35)	0.0518	0.385	8	HMDB00094;HMDB00641;HMDB00812;HMDB06483;HMDB00148;HMDB00208;HMDB00191;HMDB00161	14 (28)	0.00068	0.213	0.000396	0.014
1048	Zinc	ZnO NP-NM110 24h	Down	Irinotecan Action Pathway	SMPDB	9	ENSG00000155660;ENSG00000128228;ENSG00000198848;ENSG00000103222;ENSG00000044574;ENSG00000090520;ENSG00000143870;ENSG00000118777;ENSG00000149428	21 (23)	3.59e-05	0.00301	0		1 (12)	1	1	0.000403	0.014
1049	Zinc	ZnO NP-NM110 24h	Down	Irinotecan Metabolism Pathway	SMPDB	9	ENSG00000155660;ENSG00000128228;ENSG00000198848;ENSG00000103222;ENSG00000044574;ENSG00000090520;ENSG00000143870;ENSG00000118777;ENSG00000149428	21 (23)	3.59e-05	0.00301	0		1 (12)	1	1	0.000403	0.014
1050	Zinc	ZnO NP-NM110 24h	Down	Squalene and cholesterol biosynthesis	EHMN	12	ENSG00000052802;ENSG00000132182;ENSG00000079459;ENSG00000030066;ENSG00000172893;ENSG00000095319;ENSG00000102900;ENSG00000163002;ENSG00000147155;ENSG00000155561;ENSG00000125450;ENSG00000108559	36 (37)	3.7e-05	0.00301	0		3 (42)	1	1	0.000414	0.0141
1051	Zinc	ZnO NP-NM110 24h	Down	Influenza Viral RNA Transcription and Replication	Reactome	12	ENSG00000177700;ENSG00000102978;ENSG00000132182;ENSG00000030066;ENSG00000080824;ENSG00000105258;ENSG00000095319;ENSG00000102900;ENSG00000163002;ENSG00000155561;ENSG00000125450;ENSG00000108559	44 (44)	0.000321	0.0143	0		0 (5)	1	1	0.000321	0.0143
1052	Zinc	ZnO NP-NM110 24h	Down	2-Hydroxyglutric Aciduria (D And L Form)	SMPDB	7	ENSG00000103356;ENSG00000100522;ENSG00000023909;ENSG00000125166;ENSG00000104687;ENSG00000148672;ENSG00000021826	23 (23)	0.00291	0.0631	7	HMDB00641;HMDB01049;HMDB00148;HMDB00208;HMDB00191;HMDB00161;HMDB00125	17 (49)	0.0154	0.84	0.000493	0.0151
1053	Zinc	ZnO NP-NM110 24h	Down	Homocarnosinosis	SMPDB	7	ENSG00000103356;ENSG00000100522;ENSG00000023909;ENSG00000125166;ENSG00000104687;ENSG00000148672;ENSG00000021826	23 (23)	0.00291	0.0631	7	HMDB00641;HMDB01049;HMDB00148;HMDB00208;HMDB00191;HMDB00161;HMDB00125	17 (49)	0.0154	0.84	0.000493	0.0151
1054	Zinc	ZnO NP-NM110 24h	Down	Succinic semialdehyde dehydrogenase deficiency	SMPDB	7	ENSG00000103356;ENSG00000100522;ENSG00000023909;ENSG00000125166;ENSG00000104687;ENSG00000148672;ENSG00000021826	23 (23)	0.00291	0.0631	7	HMDB00641;HMDB01049;HMDB00148;HMDB00208;HMDB00191;HMDB00161;HMDB00125	17 (49)	0.0154	0.84	0.000493	0.0151
1055	Zinc	ZnO NP-NM110 24h	Down	4-Hydroxybutyric Aciduria/Succinic Semialdehyde Dehydrogenase Deficiency	SMPDB	7	ENSG00000103356;ENSG00000100522;ENSG00000023909;ENSG00000125166;ENSG00000104687;ENSG00000148672;ENSG00000021826	23 (23)	0.00291	0.0631	7	HMDB00641;HMDB01049;HMDB00148;HMDB00208;HMDB00191;HMDB00161;HMDB00125	17 (49)	0.0154	0.84	0.000493	0.0151
1056	Zinc	ZnO NP-NM110 24h	Down	Glutamate Metabolism	SMPDB	7	ENSG00000103356;ENSG00000100522;ENSG00000023909;ENSG00000125166;ENSG00000104687;ENSG00000148672;ENSG00000021826	23 (23)	0.00291	0.0631	7	HMDB00641;HMDB01049;HMDB00148;HMDB00208;HMDB00191;HMDB00161;HMDB00125	17 (49)	0.0154	0.84	0.000493	0.0151
1057	Zinc	ZnO NP-NM110 24h	Down	Hyperinsulinism-Hyperammonemia Syndrome	SMPDB	7	ENSG00000103356;ENSG00000100522;ENSG00000023909;ENSG00000125166;ENSG00000104687;ENSG00000148672;ENSG00000021826	23 (23)	0.00291	0.0631	7	HMDB00641;HMDB01049;HMDB00148;HMDB00208;HMDB00191;HMDB00161;HMDB00125	17 (49)	0.0154	0.84	0.000493	0.0151
1058	Zinc	ZnO NP-NM110 24h	Down	Signaling by BRAF and RAF fusions	Reactome	14	ENSG00000153094;ENSG00000171560;ENSG00000171564;ENSG00000133703;ENSG00000089220;ENSG00000115414;ENSG00000137486;ENSG00000149970;ENSG00000127314;ENSG00000171557;ENSG00000197122;ENSG00000102882;ENSG00000105939;ENSG00000171435	57 (61)	0.000345	0.0152	0		0 (8)	1	1	0.000345	0.0152
1059	Zinc	ZnO NP-NM110 24h	Down	Bisphosphonate Pathway_ Pharmacodynamics	PharmGKB	7	ENSG00000067560;ENSG00000133703;ENSG00000070831;ENSG00000079459;ENSG00000160752;ENSG00000112972;ENSG00000136238	17 (17)	0.00037	0.0158	0		0 (0)	1	1	0.00037	0.0158
1060	Zinc	ZnO NP-NM110 24h	Down	Disease	Reactome	61	ENSG00000153113;ENSG00000184916;ENSG00000133703;ENSG00000099901;ENSG00000102900;ENSG00000170315;ENSG00000127314;ENSG00000137486;ENSG00000030066;ENSG00000125450;ENSG00000115414;ENSG00000143801;ENSG00000183020;ENSG00000153094;ENSG00000006125;ENSG00000166747;ENSG00000101158;ENSG00000179218;ENSG00000089220;ENSG00000108424;ENSG00000101384;ENSG00000166710;ENSG00000162909;ENSG00000132182;ENSG00000197122…	458 (514)	0.000751	0.0284	3	HMDB00125;HMDB08956;HMDB05780;HMDB09054;HMDB09052;HMDB08828;HMDB08987;HMDB08859;HMDB09219;HMDB08924;HMDB08894;HMDB08899;HMDB00208	6 (111)	0.0661	1	0.000542	0.0164
1061	Zinc	ZnO NP-NM110 24h	Down	Metabolism of nucleotides	Reactome	14	ENSG00000273841;ENSG00000121691;ENSG00000179958;ENSG00000165609;ENSG00000162433;ENSG00000128050;ENSG00000116337;ENSG00000168393;ENSG00000104687;ENSG00000173221;ENSG00000197586;ENSG00000198805;ENSG00000185100;ENSG00000136810	92 (100)	0.0314	0.291	9	HMDB00056;HMDB00641;HMDB02031;HMDB00148;HMDB00218;HMDB00191;HMDB00079;HMDB00161;HMDB00125	19 (150)	0.00179	0.286	0.000607	0.018
1062	Zinc	ZnO NP-NM110 24h	Down	Glycine_ serine_ alanine and threonine metabolism	EHMN	13	ENSG00000166165;ENSG00000197375;ENSG00000167703;ENSG00000132182;ENSG00000178445;ENSG00000030066;ENSG00000102900;ENSG00000095319;ENSG00000168003;ENSG00000163002;ENSG00000155561;ENSG00000125450;ENSG00000108559	63 (80)	0.00307	0.0651	10	HMDB00641;HMDB00078;HMDB01311;HMDB00271;HMDB00272;HMDB01721;HMDB00148;HMDB00208;HMDB00064;HMDB00161;HMDB00125	30 (88)	0.0201	0.914	0.000659	0.0193
1063	Zinc	ZnO NP-NM110 24h	Down	Cellular response to heat stress	Reactome	21	ENSG00000102882;ENSG00000204389;ENSG00000110958;ENSG00000132002;ENSG00000204388;ENSG00000165280;ENSG00000044574;ENSG00000187522;ENSG00000030066;ENSG00000145349;ENSG00000170315;ENSG00000080824;ENSG00000125450;ENSG00000095319;ENSG00000102900;ENSG00000132182;ENSG00000158941;ENSG00000108559;ENSG00000155561;ENSG00000096384;ENSG00000163002	95 (100)	6.76e-05	0.00471	0		2 (9)	1	1	0.000717	0.0206
1064	Zinc	ZnO NP-NM110 24h	Down	Neutrophil degranulation	Reactome	55	ENSG00000067560;ENSG00000105220;ENSG00000129353;ENSG00000166710;ENSG00000084733;ENSG00000257335;ENSG00000163993;ENSG00000188229;ENSG00000127314;ENSG00000104043;ENSG00000143621;ENSG00000239264;ENSG00000170458;ENSG00000149177;ENSG00000145703;ENSG00000035862;ENSG00000109861;ENSG00000123131;ENSG00000261371;ENSG00000196230;ENSG00000100994;ENSG00000124107;ENSG00000102580;ENSG00000131504;ENSG00000173692…	396 (497)	0.000495	0.0207	0		0 (4)	1	1	0.000495	0.0207
1065	Zinc	ZnO NP-NM110 24h	Down	Wnt Canonical	INOH	20	ENSG00000063660;ENSG00000205220;ENSG00000177283;ENSG00000165916;ENSG00000013275;ENSG00000185627;ENSG00000173692;ENSG00000050165;ENSG00000115884;ENSG00000095261;ENSG00000070018;ENSG00000099341;ENSG00000100567;ENSG00000108671;ENSG00000100902;ENSG00000101182;ENSG00000163251;ENSG00000277791;ENSG00000100804;ENSG00000142507	102 (120)	0.000545	0.0222	0		0 (0)	1	1	0.000545	0.0222
1066	Zinc	ZnO NP-NM110 24h	Down	Wnt Mammals	INOH	20	ENSG00000063660;ENSG00000205220;ENSG00000177283;ENSG00000165916;ENSG00000013275;ENSG00000185627;ENSG00000173692;ENSG00000050165;ENSG00000115884;ENSG00000095261;ENSG00000070018;ENSG00000099341;ENSG00000100567;ENSG00000108671;ENSG00000100902;ENSG00000101182;ENSG00000163251;ENSG00000277791;ENSG00000100804;ENSG00000142507	102 (120)	0.000545	0.0222	0		0 (0)	1	1	0.000545	0.0222
1067	Zinc	ZnO NP-NM110 24h	Down	Phase II conjugation	Reactome	11	ENSG00000116704;ENSG00000143198;ENSG00000088002;ENSG00000198682;ENSG00000171428;ENSG00000023909;ENSG00000213648;ENSG00000100031;ENSG00000133313;ENSG00000109814;ENSG00000101444	79 (112)	0.0882	0.5	10	HMDB00641;HMDB01895;HMDB00148;HMDB01870;HMDB01049;HMDB00267;HMDB00078;HMDB01859;HMDB00125;HMDB01392	21 (147)	0.000915	0.213	0.000841	0.0223
1068	Zinc	ZnO NP-NM110 24h	Down	Glutamate Glutamine metabolism	INOH	6	ENSG00000023909;ENSG00000104687;ENSG00000165092;ENSG00000111275;ENSG00000148672;ENSG00000021826	25 (28)	0.0196	0.213	7	HMDB00641;HMDB01049;HMDB00148;HMDB00208;HMDB00191;HMDB00161;HMDB00125	14 (34)	0.00424	0.456	0.000861	0.0223
1069	Zinc	ZnO NP-NM110 24h	Down	Biosynthesis of unsaturated fatty acids - Homo sapiens (human)	KEGG	9	ENSG00000012660;ENSG00000134824;ENSG00000074696;ENSG00000099194;ENSG00000197977;ENSG00000119673;ENSG00000149485;ENSG00000206527;ENSG00000170522	23 (23)	8.48e-05	0.00555	0		5 (54)	1	1	0.00088	0.0223
1070	Zinc	ZnO NP-NM110 24h	Down	Influenza Infection	Reactome	16	ENSG00000177700;ENSG00000102978;ENSG00000204389;ENSG00000132182;ENSG00000179218;ENSG00000108424;ENSG00000080824;ENSG00000105258;ENSG00000095319;ENSG00000102900;ENSG00000163002;ENSG00000030066;ENSG00000114030;ENSG00000155561;ENSG00000125450;ENSG00000108559	63 (63)	8.65e-05	0.00558	0		1 (10)	1	1	0.000896	0.0223
1071	Zinc	ZnO NP-NM110 24h	Down	Argininemia	SMPDB	5	ENSG00000148672;ENSG00000126522;ENSG00000021826;ENSG00000125166;ENSG00000130707	11 (13)	0.00159	0.0441	5	HMDB00641;HMDB00191;HMDB00161;HMDB00148;HMDB00208	13 (27)	0.0546	1	0.0009	0.0223
1072	Zinc	ZnO NP-NM110 24h	Down	Citrullinemia Type I	SMPDB	5	ENSG00000148672;ENSG00000126522;ENSG00000021826;ENSG00000125166;ENSG00000130707	11 (13)	0.00159	0.0441	5	HMDB00641;HMDB00191;HMDB00161;HMDB00148;HMDB00208	13 (27)	0.0546	1	0.0009	0.0223
1073	Zinc	ZnO NP-NM110 24h	Down	Carbamoyl Phosphate Synthetase Deficiency	SMPDB	5	ENSG00000148672;ENSG00000126522;ENSG00000021826;ENSG00000125166;ENSG00000130707	11 (13)	0.00159	0.0441	5	HMDB00641;HMDB00191;HMDB00161;HMDB00148;HMDB00208	13 (27)	0.0546	1	0.0009	0.0223
1074	Zinc	ZnO NP-NM110 24h	Down	Argininosuccinic Aciduria	SMPDB	5	ENSG00000148672;ENSG00000126522;ENSG00000021826;ENSG00000125166;ENSG00000130707	11 (13)	0.00159	0.0441	5	HMDB00641;HMDB00191;HMDB00161;HMDB00148;HMDB00208	13 (27)	0.0546	1	0.0009	0.0223
1075	Zinc	ZnO NP-NM110 24h	Down	Urea Cycle	SMPDB	5	ENSG00000148672;ENSG00000126522;ENSG00000021826;ENSG00000125166;ENSG00000130707	11 (13)	0.00159	0.0441	5	HMDB00641;HMDB00191;HMDB00161;HMDB00148;HMDB00208	13 (27)	0.0546	1	0.0009	0.0223
1076	Zinc	ZnO NP-NM110 24h	Down	Ornithine Transcarbamylase Deficiency (OTC Deficiency)	SMPDB	5	ENSG00000148672;ENSG00000126522;ENSG00000021826;ENSG00000125166;ENSG00000130707	11 (13)	0.00159	0.0441	5	HMDB00641;HMDB00191;HMDB00161;HMDB00148;HMDB00208	13 (27)	0.0546	1	0.0009	0.0223
1077	Zinc	ZnO NP-NM110 24h	Down	Host Interactions of HIV factors	Reactome	19	ENSG00000183020;ENSG00000006125;ENSG00000166747;ENSG00000129354;ENSG00000166710;ENSG00000170315;ENSG00000099901;ENSG00000136238;ENSG00000155561;ENSG00000155849;ENSG00000095319;ENSG00000163002;ENSG00000102900;ENSG00000132182;ENSG00000030066;ENSG00000114030;ENSG00000108424;ENSG00000125450;ENSG00000108559	83 (91)	9.03e-05	0.00565	0		1 (5)	1	1	0.000931	0.0228
1078	Zinc	ZnO NP-NM110 24h	Down	Integrins in angiogenesis	PID	14	ENSG00000158769;ENSG00000067560;ENSG00000120899;ENSG00000204262;ENSG00000115884;ENSG00000109072;ENSG00000134215;ENSG00000060718;ENSG00000136238;ENSG00000080824;ENSG00000197122;ENSG00000102882;ENSG00000184371;ENSG00000115414	60 (66)	0.000606	0.0242	0		0 (2)	1	1	0.000606	0.0242
1079	Zinc	ZnO NP-NM110 24h	Down	Hedgehog	INOH	15	ENSG00000205220;ENSG00000164690;ENSG00000165916;ENSG00000013275;ENSG00000100902;ENSG00000173692;ENSG00000095261;ENSG00000099341;ENSG00000100567;ENSG00000108671;ENSG00000185627;ENSG00000101182;ENSG00000277791;ENSG00000100804;ENSG00000142507	67 (72)	0.000626	0.0247	0		0 (0)	1	1	0.000626	0.0247
1080	Zinc	ZnO NP-NM110 24h	Down	CD4 T cell receptor signaling-NFkB cascade	INOH	16	ENSG00000205220;ENSG00000165916;ENSG00000013275;ENSG00000185627;ENSG00000173692;ENSG00000095261;ENSG00000101182;ENSG00000099341;ENSG00000100567;ENSG00000108671;ENSG00000100902;ENSG00000100906;ENSG00000104825;ENSG00000277791;ENSG00000100804;ENSG00000142507	74 (95)	0.000629	0.0247	1	HMDB07101;HMDB07214;HMDB07129	1 (4)	0.172	1	0.0011	0.0265
1081	Zinc	ZnO NP-NM110 24h	Down	Steroid biosynthesis - Homo sapiens (human)	KEGG	8	ENSG00000052802;ENSG00000057252;ENSG00000079459;ENSG00000116133;ENSG00000172893;ENSG00000132196;ENSG00000147155;ENSG00000001630	19 (20)	0.000115	0.00685	0		3 (50)	1	1	0.00116	0.0269
1082	Zinc	ZnO NP-NM110 24h	Down	Activation of gene expression by SREBF (SREBP)	Wikipathways	8	ENSG00000079459;ENSG00000099194;ENSG00000160752;ENSG00000172893;ENSG00000169710;ENSG00000112972;ENSG00000170522;ENSG00000167508	19 (19)	0.000115	0.00685	0		2 (6)	1	1	0.00116	0.0269
1083	Zinc	ZnO NP-NM110 24h	Down	Metabolism of fat-soluble vitamins	Reactome	11	ENSG00000063660;ENSG00000197324;ENSG00000072042;ENSG00000130164;ENSG00000115884;ENSG00000187134;ENSG00000198610;ENSG00000198074;ENSG00000196139;ENSG00000157193;ENSG00000138207	35 (52)	0.000143	0.00765	1	HMDB07101;HMDB07214;HMDB07129	9 (41)	0.82	1	0.00118	0.0269
1084	Zinc	ZnO NP-NM110 24h	Down	Glutathione metabolism - Homo sapiens (human)	KEGG	9	ENSG00000116649;ENSG00000023909;ENSG00000160211;ENSG00000176153;ENSG00000143198;ENSG00000100031;ENSG00000104687;ENSG00000138413;ENSG00000142657	40 (54)	0.00721	0.122	5	HMDB01049;HMDB00125;HMDB00267;HMDB00078;HMDB00148	10 (38)	0.0164	0.857	0.00119	0.0269
1085	Zinc	ZnO NP-NM110 24h	Down	Vitamin E metabolism	EHMN	12	ENSG00000127884;ENSG00000132182;ENSG00000030066;ENSG00000186529;ENSG00000072506;ENSG00000119673;ENSG00000095319;ENSG00000102900;ENSG00000163002;ENSG00000155561;ENSG00000125450;ENSG00000108559	40 (43)	0.000118	0.00685	0		1 (21)	1	1	0.00119	0.0269
1086	Zinc	ZnO NP-NM110 24h	Down	Folate Metabolism	Wikipathways	13	ENSG00000057593;ENSG00000176974;ENSG00000100714;ENSG00000108691;ENSG00000130164;ENSG00000121691;ENSG00000073060;ENSG00000228716;ENSG00000112096;ENSG00000101444;ENSG00000184371;ENSG00000176153;ENSG00000163631	46 (66)	0.000122	0.00687	0		13 (67)	1	1	0.00123	0.0274
1087	Zinc	ZnO NP-NM110 24h	Down	Gap junction - Homo sapiens (human)	KEGG	15	ENSG00000149782;ENSG00000133703;ENSG00000167552;ENSG00000123416;ENSG00000152661;ENSG00000127824;ENSG00000198121;ENSG00000188229;ENSG00000137267;ENSG00000162104;ENSG00000170962;ENSG00000176014;ENSG00000197122;ENSG00000102882;ENSG00000196230	73 (88)	0.00159	0.0441	2	HMDB07101;HMDB07214;HMDB07129;HMDB00148	3 (11)	0.0778	1	0.00124	0.0274
1088	Zinc	ZnO NP-NM110 24h	Down	GRB2:SOS provides linkage to MAPK signaling for Integrins	Reactome	6	ENSG00000171560;ENSG00000171564;ENSG00000127314;ENSG00000197122;ENSG00000171557;ENSG00000115414	14 (16)	0.00077	0.0284	0		0 (6)	1	1	0.00077	0.0284
1089	Zinc	ZnO NP-NM110 24h	Down	p130Cas linkage to MAPK signaling for integrins	Reactome	6	ENSG00000171560;ENSG00000171564;ENSG00000127314;ENSG00000197122;ENSG00000171557;ENSG00000115414	14 (16)	0.00077	0.0284	0		0 (8)	1	1	0.00077	0.0284
1090	Zinc	ZnO NP-NM110 24h	Down	Morphine Metabolism Pathway	SMPDB	6	ENSG00000155660;ENSG00000128228;ENSG00000044574;ENSG00000090520;ENSG00000143870;ENSG00000149428	14 (16)	0.00077	0.0284	0		0 (6)	1	1	0.00077	0.0284
1091	Zinc	ZnO NP-NM110 24h	Down	classical complement pathway	BioCarta	4	ENSG00000159403;ENSG00000182326;ENSG00000125730;ENSG00000106804	6 (14)	0.000797	0.0292	0		0 (2)	1	1	0.000797	0.0292
1092	Zinc	ZnO NP-NM110 24h	Down	Urea cycle and metabolism of amino groups	Wikipathways	7	ENSG00000166165;ENSG00000116649;ENSG00000059573;ENSG00000021826;ENSG00000126522;ENSG00000148672;ENSG00000130707	18 (20)	0.000559	0.0226	4	HMDB00191;HMDB00271;HMDB00148;HMDB00064	15 (30)	0.247	1	0.00137	0.0298
1093	Zinc	ZnO NP-NM110 24h	Down	Viral Messenger RNA Synthesis	Reactome	11	ENSG00000177700;ENSG00000132182;ENSG00000030066;ENSG00000102978;ENSG00000105258;ENSG00000095319;ENSG00000102900;ENSG00000163002;ENSG00000155561;ENSG00000125450;ENSG00000108559	42 (42)	0.000823	0.0299	0		0 (5)	1	1	0.000823	0.0299
1094	Zinc	ZnO NP-NM110 24h	Down	Nectin adhesion pathway	PID	9	ENSG00000158769;ENSG00000070831;ENSG00000039068;ENSG00000073008;ENSG00000163347;ENSG00000136238;ENSG00000127314;ENSG00000197122;ENSG00000006607	30 (31)	0.000842	0.0301	0		0 (3)	1	1	0.000842	0.0301
1095	Zinc	ZnO NP-NM110 24h	Down	G13 Signaling Pathway	Wikipathways	10	ENSG00000108518;ENSG00000131504;ENSG00000067560;ENSG00000145703;ENSG00000070831;ENSG00000131941;ENSG00000120063;ENSG00000165410;ENSG00000136238;ENSG00000198668	36 (38)	0.000857	0.0301	0		0 (0)	1	1	0.000857	0.0301
1096	Zinc	ZnO NP-NM110 24h	Down	Cholesterol Biosynthesis	Wikipathways	7	ENSG00000052802;ENSG00000079459;ENSG00000160752;ENSG00000167508;ENSG00000001630;ENSG00000112972;ENSG00000172893	15 (15)	0.000143	0.00765	0		1 (14)	1	1	0.00141	0.0305
1097	Zinc	ZnO NP-NM110 24h	Down	Arachidonic acid metabolism	EHMN	15	ENSG00000143198;ENSG00000143819;ENSG00000159228;ENSG00000095319;ENSG00000030066;ENSG00000186204;ENSG00000186529;ENSG00000117592;ENSG00000163002;ENSG00000102900;ENSG00000132182;ENSG00000116711;ENSG00000155561;ENSG00000125450;ENSG00000108559	63 (101)	0.000309	0.0139	2	HMDB00125;HMDB00564;HMDB08031;HMDB07871;HMDB07901;HMDB07902;HMDB07998;HMDB07870;HMDB07933;HMDB07966	9 (53)	0.476	1	0.00144	0.0306
1098	Zinc	ZnO NP-NM110 24h	Down	4-hydroxyproline degradation	HumanCyc	2	ENSG00000125166;ENSG00000250799	4 (4)	0.0418	0.327	4	HMDB01369;HMDB06556;HMDB00208;HMDB00148	5 (17)	0.00355	0.404	0.00145	0.0306
1099	Zinc	ZnO NP-NM110 24h	Down	De novo fatty acid biosynthesis	EHMN	12	ENSG00000132182;ENSG00000141552;ENSG00000030066;ENSG00000119673;ENSG00000100865;ENSG00000095319;ENSG00000102900;ENSG00000163002;ENSG00000099194;ENSG00000155561;ENSG00000125450;ENSG00000108559	41 (44)	0.000154	0.00782	0		7 (59)	1	1	0.00151	0.0313
1100	Zinc	ZnO NP-NM110 24h	Down	The oncogenic action of L-2-hydroxyglutarate in Hydroxygluaricaciduria	SMPDB	4	ENSG00000138413;ENSG00000163541;ENSG00000148672;ENSG00000062485	29 (29)	0.253	0.741	7	HMDB00094;HMDB00641;HMDB00156;HMDB01372;HMDB00148;HMDB00208;HMDB00193	11 (41)	0.000637	0.213	0.00157	0.0323
1101	Zinc	ZnO NP-NM110 24h	Down	VEGFA-VEGFR2 Signaling Pathway	Wikipathways	34	ENSG00000063660;ENSG00000067560;ENSG00000155366;ENSG00000120899;ENSG00000136717;ENSG00000169410;ENSG00000172602;ENSG00000138814;ENSG00000162341;ENSG00000278540;ENSG00000149177;ENSG00000101384;ENSG00000152661;ENSG00000100906;ENSG00000197122;ENSG00000171560;ENSG00000171564;ENSG00000116711;ENSG00000108691;ENSG00000162909;ENSG00000110092;ENSG00000116478;ENSG00000171557;ENSG00000102882;ENSG00000108518…	220 (236)	0.000935	0.0326	0		0 (0)	1	1	0.000935	0.0326
1102	Zinc	ZnO NP-NM110 24h	Down	The oncogenic action of D-2-hydroxyglutarate in Hydroxygluaricaciduria	SMPDB	4	ENSG00000138413;ENSG00000163541;ENSG00000148672;ENSG00000062485	30 (30)	0.273	0.773	7	HMDB00094;HMDB00641;HMDB00156;HMDB01372;HMDB00148;HMDB00208;HMDB00193	11 (41)	0.000637	0.213	0.00168	0.0339
1103	Zinc	ZnO NP-NM110 24h	Down	Long-term potentiation - Homo sapiens (human)	KEGG	11	ENSG00000198668;ENSG00000172531;ENSG00000133703;ENSG00000149782;ENSG00000145349;ENSG00000117676;ENSG00000127314;ENSG00000177189;ENSG00000138814;ENSG00000102882;ENSG00000221823	53 (67)	0.00597	0.107	2	HMDB07101;HMDB07214;HMDB07129;HMDB00148	2 (7)	0.0292	1	0.00168	0.0339
1104	Zinc	ZnO NP-NM110 24h	Down	Photodynamic therapy-induced unfolded protein response	Wikipathways	8	ENSG00000153094;ENSG00000102580;ENSG00000100219;ENSG00000179218;ENSG00000044574;ENSG00000090520;ENSG00000143870;ENSG00000140105	25 (27)	0.00102	0.0339	0		0 (0)	1	1	0.00102	0.0339
1105	Zinc	ZnO NP-NM110 24h	Down	Vitamin D3 (cholecalciferol) metabolism	EHMN	8	ENSG00000132182;ENSG00000030066;ENSG00000095319;ENSG00000102900;ENSG00000163002;ENSG00000155561;ENSG00000125450;ENSG00000108559	25 (27)	0.00102	0.0339	0		0 (12)	1	1	0.00102	0.0339
1106	Zinc	ZnO NP-NM110 24h	Down	Doxorubicin Pathway_ Pharmacokinetics	PharmGKB	7	ENSG00000196139;ENSG00000127948;ENSG00000159228;ENSG00000103222;ENSG00000121691;ENSG00000115286;ENSG00000118777	20 (22)	0.00116	0.0362	0		0 (1)	1	1	0.00116	0.0362
1107	Zinc	ZnO NP-NM110 24h	Down	Pathogenic Escherichia coli infection - Homo sapiens (human)	KEGG	12	ENSG00000170458;ENSG00000067560;ENSG00000070831;ENSG00000167552;ENSG00000039068;ENSG00000123416;ENSG00000176014;ENSG00000127824;ENSG00000188229;ENSG00000137267;ENSG00000163347;ENSG00000196230	50 (55)	0.00112	0.0354	1	HMDB08956;HMDB05780;HMDB09054;HMDB09052;HMDB08828;HMDB08987;HMDB08859;HMDB09219;HMDB08924;HMDB08894;HMDB08899	1 (1)	0.172	1	0.00184	0.0363
1108	Zinc	ZnO NP-NM110 24h	Down	Pathogenic Escherichia coli infection	Wikipathways	12	ENSG00000170458;ENSG00000067560;ENSG00000167552;ENSG00000070831;ENSG00000039068;ENSG00000123416;ENSG00000176014;ENSG00000127824;ENSG00000188229;ENSG00000137267;ENSG00000163347;ENSG00000196230	50 (56)	0.00112	0.0354	1	HMDB08956;HMDB05780;HMDB09054;HMDB09052;HMDB08828;HMDB08987;HMDB08859;HMDB09219;HMDB08924;HMDB08894;HMDB08899	1 (1)	0.172	1	0.00184	0.0363
1109	Zinc	ZnO NP-NM110 24h	Down	Glyoxylate and dicarboxylate metabolism - Homo sapiens (human)	KEGG	6	ENSG00000176974;ENSG00000120437;ENSG00000178445;ENSG00000121691;ENSG00000062485;ENSG00000184207	26 (28)	0.0236	0.232	6	HMDB00094;HMDB00641;HMDB00156;HMDB00148;HMDB00208;HMDB00193	12 (61)	0.00832	0.6	0.00187	0.0364
1110	Zinc	ZnO NP-NM110 24h	Down	Metapathway biotransformation	Wikipathways	21	ENSG00000125430;ENSG00000143198;ENSG00000088002;ENSG00000147119;ENSG00000162040;ENSG00000171428;ENSG00000128242;ENSG00000198074;ENSG00000196139;ENSG00000187134;ENSG00000115526;ENSG00000213648;ENSG00000186204;ENSG00000186529;ENSG00000151632;ENSG00000104687;ENSG00000143819;ENSG00000001630;ENSG00000176153;ENSG00000198610;ENSG00000110583	116 (177)	0.00119	0.0365	0		0 (0)	1	1	0.00119	0.0365
1111	Zinc	ZnO NP-NM110 24h	Down	Aminosugars metabolism	EHMN	10	ENSG00000132182;ENSG00000030066;ENSG00000168003;ENSG00000100522;ENSG00000095319;ENSG00000102900;ENSG00000163002;ENSG00000155561;ENSG00000125450;ENSG00000108559	42 (51)	0.00305	0.0651	4	HMDB00641;HMDB01310;HMDB00161;HMDB00148	10 (43)	0.0744	1	0.00213	0.0408
1112	Zinc	ZnO NP-NM110 24h	Down	Arginine Proline metabolism	INOH	10	ENSG00000166165;ENSG00000116649;ENSG00000123505;ENSG00000023909;ENSG00000126522;ENSG00000125166;ENSG00000165092;ENSG00000111275;ENSG00000148672;ENSG00000130707	48 (55)	0.00834	0.13	9	HMDB00641;HMDB00156;HMDB01049;HMDB00148;HMDB00208;HMDB01369;HMDB00191;HMDB06556;HMDB00064	27 (68)	0.0274	1	0.00214	0.0408
1113	Zinc	ZnO NP-NM110 24h	Down	mucin core 1 and core 2 <i>O</i>-glycosylation	HumanCyc	8	ENSG00000259075;ENSG00000164574;ENSG00000008513;ENSG00000110080;ENSG00000257594;ENSG00000179913;ENSG00000140297;ENSG00000143641	26 (30)	0.00136	0.0411	0		0 (8)	1	1	0.00136	0.0411
1114	Zinc	ZnO NP-NM110 24h	Down	Vpr-mediated nuclear import of PICs	Reactome	9	ENSG00000132182;ENSG00000030066;ENSG00000095319;ENSG00000102900;ENSG00000163002;ENSG00000114030;ENSG00000155561;ENSG00000125450;ENSG00000108559	32 (32)	0.0014	0.0415	0		0 (0)	1	1	0.0014	0.0415
1115	Zinc	ZnO NP-NM110 24h	Down	Amino acid synthesis and interconversion (transamination)	Reactome	3	ENSG00000059573;ENSG00000148672;ENSG00000125166	27 (32)	0.434	0.916	10	HMDB00641;HMDB00056;HMDB00251;HMDB00812;HMDB00965;HMDB00272;HMDB01721;HMDB00148;HMDB00208;HMDB00191;HMDB00161	20 (43)	0.000557	0.213	0.00225	0.0425
1116	Zinc	ZnO NP-NM110 24h	Down	Legionellosis - Homo sapiens (human)	KEGG	12	ENSG00000170458;ENSG00000172936;ENSG00000081041;ENSG00000163734;ENSG00000204389;ENSG00000125730;ENSG00000204388;ENSG00000265808;ENSG00000163739;ENSG00000165280;ENSG00000100906;ENSG00000101210	52 (55)	0.00162	0.0446	0		0 (2)	1	1	0.00162	0.0446
1117	Zinc	ZnO NP-NM110 24h	Down	Ibuprofen Action Pathway	SMPDB	10	ENSG00000155660;ENSG00000196139;ENSG00000128228;ENSG00000044574;ENSG00000090520;ENSG00000143870;ENSG00000186529;ENSG00000100031;ENSG00000159228;ENSG00000149428	35 (50)	0.000671	0.0261	3	HMDB00125;HMDB00148;HMDB00564;HMDB08031;HMDB07871;HMDB07901;HMDB07902;HMDB07998;HMDB07870;HMDB07933;HMDB07966	13 (79)	0.392	1	0.00243	0.0454
1118	Zinc	ZnO NP-NM110 24h	Down	Innate Immune System	Reactome	105	ENSG00000000971;ENSG00000172936;ENSG00000100600;ENSG00000168710;ENSG00000154678;ENSG00000104043;ENSG00000143621;ENSG00000165240;ENSG00000133703;ENSG00000145703;ENSG00000145555;ENSG00000109861;ENSG00000177189;ENSG00000261371;ENSG00000197122;ENSG00000104312;ENSG00000165916;ENSG00000173692;ENSG00000108671;ENSG00000185627;ENSG00000102158;ENSG00000171314;ENSG00000244038;ENSG00000162104;ENSG00000155849…	934 (1309)	0.00528	0.1	4	HMDB07101;HMDB07214;HMDB07129;HMDB00125;HMDB00148;HMDB00564;HMDB08031;HMDB07871;HMDB07901;HMDB07902;HMDB07998;HMDB07870;HMDB07933;HMDB07966	9 (116)	0.0512	1	0.00249	0.0455
1119	Zinc	ZnO NP-NM110 24h	Down	Pyrimidine nucleotides nucleosides metabolism	INOH	3	ENSG00000168393;ENSG00000197586;ENSG00000021826	47 (52)	0.8	1	8	HMDB00641;HMDB00056;HMDB02031;HMDB00148;HMDB00208;HMDB00218;HMDB00191;HMDB00079	13 (56)	0.000338	0.213	0.00249	0.0455
1120	Zinc	ZnO NP-NM110 24h	Down	Citric acid cycle (TCA cycle)	Reactome	3	ENSG00000163541;ENSG00000136143;ENSG00000062485	19 (19)	0.235	0.741	6	HMDB00094;HMDB00156;HMDB01372;HMDB00208;HMDB01874;HMDB00193	9 (28)	0.00118	0.213	0.00254	0.0455
1121	Zinc	ZnO NP-NM110 24h	Down	The oncogenic action of 2-hydroxyglutarate	SMPDB	3	ENSG00000138413;ENSG00000163541;ENSG00000062485	27 (27)	0.434	0.916	7	HMDB00094;HMDB00641;HMDB00156;HMDB01372;HMDB00148;HMDB00208;HMDB00193	11 (40)	0.000637	0.213	0.00254	0.0455
1122	Zinc	ZnO NP-NM110 24h	Down	Gamma-glutamyl-transpeptidase deficiency	SMPDB	2	ENSG00000104687;ENSG00000023909	11 (11)	0.255	0.741	6	HMDB01049;HMDB00148;HMDB00078;HMDB00161;HMDB00125;HMDB00267	9 (22)	0.00118	0.213	0.00273	0.046
1123	Zinc	ZnO NP-NM110 24h	Down	5-oxoprolinase deficiency	SMPDB	2	ENSG00000104687;ENSG00000023909	11 (11)	0.255	0.741	6	HMDB01049;HMDB00148;HMDB00078;HMDB00161;HMDB00125;HMDB00267	9 (22)	0.00118	0.213	0.00273	0.046
1124	Zinc	ZnO NP-NM110 24h	Down	Gamma-Glutamyltransferase Deficiency	SMPDB	2	ENSG00000104687;ENSG00000023909	11 (11)	0.255	0.741	6	HMDB01049;HMDB00148;HMDB00078;HMDB00161;HMDB00125;HMDB00267	9 (22)	0.00118	0.213	0.00273	0.046
1125	Zinc	ZnO NP-NM110 24h	Down	Glutathione Metabolism	SMPDB	2	ENSG00000104687;ENSG00000023909	11 (11)	0.255	0.741	6	HMDB01049;HMDB00148;HMDB00078;HMDB00161;HMDB00125;HMDB00267	9 (22)	0.00118	0.213	0.00273	0.046
1126	Zinc	ZnO NP-NM110 24h	Down	Glutathione Synthetase Deficiency	SMPDB	2	ENSG00000104687;ENSG00000023909	11 (11)	0.255	0.741	6	HMDB01049;HMDB00148;HMDB00078;HMDB00161;HMDB00125;HMDB00267	9 (22)	0.00118	0.213	0.00273	0.046
1127	Zinc	ZnO NP-NM110 24h	Down	5-Oxoprolinuria	SMPDB	2	ENSG00000104687;ENSG00000023909	11 (11)	0.255	0.741	6	HMDB01049;HMDB00148;HMDB00078;HMDB00161;HMDB00125;HMDB00267	9 (22)	0.00118	0.213	0.00273	0.046
1128	Zinc	ZnO NP-NM110 24h	Down	Tryptophan metabolism	Wikipathways	10	ENSG00000127884;ENSG00000132437;ENSG00000126457;ENSG00000121691;ENSG00000186204;ENSG00000072506;ENSG00000116133;ENSG00000165092;ENSG00000111275;ENSG00000140105	32 (46)	0.000301	0.0137	0		2 (27)	1	1	0.00274	0.046
1129	Zinc	ZnO NP-NM110 24h	Down	SLC-mediated transmembrane transport	Reactome	32	ENSG00000116704;ENSG00000136052;ENSG00000167703;ENSG00000146477;ENSG00000070214;ENSG00000156515;ENSG00000064651;ENSG00000198668;ENSG00000160326;ENSG00000138074;ENSG00000125450;ENSG00000197375;ENSG00000132182;ENSG00000108559;ENSG00000129353;ENSG00000103257;ENSG00000174502;ENSG00000047457;ENSG00000163631;ENSG00000095319;ENSG00000102900;ENSG00000104635;ENSG00000196950;ENSG00000080493;ENSG00000155465…	215 (286)	0.00243	0.0596	12	HMDB00056;HMDB00094;HMDB00156;HMDB00251;HMDB06483;HMDB00190;HMDB00148;HMDB00208;HMDB00191;HMDB00641;HMDB01310;HMDB00161	50 (173)	0.125	1	0.00277	0.046
1130	Zinc	ZnO NP-NM110 24h	Down	HSF1 activation	Reactome	8	ENSG00000204389;ENSG00000110958;ENSG00000132002;ENSG00000204388;ENSG00000170315;ENSG00000165280;ENSG00000080824;ENSG00000096384	27 (31)	0.00178	0.0461	0		0 (0)	1	1	0.00178	0.0461
1131	Zinc	ZnO NP-NM110 24h	Down	Staphylococcus aureus infection - Homo sapiens (human)	KEGG	8	ENSG00000000971;ENSG00000242574;ENSG00000159403;ENSG00000182326;ENSG00000125730;ENSG00000186395;ENSG00000106804;ENSG00000171557	27 (56)	0.00178	0.0461	0		0 (12)	1	1	0.00178	0.0461
1132	Zinc	ZnO NP-NM110 24h	Down	Transmembrane transport of small molecules	Reactome	58	ENSG00000116704;ENSG00000166206;ENSG00000136052;ENSG00000167703;ENSG00000129353;ENSG00000103222;ENSG00000125257;ENSG00000170315;ENSG00000160326;ENSG00000070214;ENSG00000104043;ENSG00000165240;ENSG00000162341;ENSG00000104321;ENSG00000125450;ENSG00000198668;ENSG00000118777;ENSG00000136986;ENSG00000072274;ENSG00000164163;ENSG00000118515;ENSG00000196950;ENSG00000145349;ENSG00000123124;ENSG00000138074…	467 (628)	0.005	0.0959	14	HMDB00056;HMDB00641;HMDB00156;HMDB00251;HMDB08956;HMDB05780;HMDB09054;HMDB09052;HMDB08828;HMDB08987;HMDB08859;HMDB09219;HMDB08924;HMDB08894;HMDB08899;HMDB06483;HMDB00190;HMDB00094;HMDB00148;HMDB00208;HMDB00564;HMDB08031;HMDB07871;HMDB07901;HMDB07902;HMDB07998;HMDB07870;HMDB07933;HMDB07966;HMDB00191;HMDB01310;HMDB00161	55 (212)	0.0655	1	0.00295	0.0486
1133	Zinc	ZnO NP-NM110 24h	Down	Integrin cell surface interactions	Reactome	12	ENSG00000158769;ENSG00000083457;ENSG00000171560;ENSG00000171564;ENSG00000173402;ENSG00000039068;ENSG00000091409;ENSG00000182871;ENSG00000261371;ENSG00000109072;ENSG00000171557;ENSG00000115414	53 (68)	0.00193	0.049	0		0 (1)	1	1	0.00193	0.049
1134	Zinc	ZnO NP-NM110 24h	Down	Complement and coagulation cascades - Homo sapiens (human)	KEGG	12	ENSG00000057593;ENSG00000000971;ENSG00000171564;ENSG00000164220;ENSG00000159403;ENSG00000182326;ENSG00000125730;ENSG00000101000;ENSG00000171560;ENSG00000106804;ENSG00000109072;ENSG00000171557	53 (79)	0.00193	0.049	0		0 (2)	1	1	0.00193	0.049
1135	Zinc	ZnO NP-NM111 01h	Up	none statistically significant at q<0.05
1136	Zinc	ZnO NP-NM111 01h	Down	none statistically significant at q<0.06
1137	Zinc	ZnO NP-NM111 06h	Up	Attenuation phase	Reactome	16	ENSG00000105993;ENSG00000004478;ENSG00000110958;ENSG00000204389;ENSG00000204388;ENSG00000204390;ENSG00000146072;ENSG00000149257;ENSG00000160570;ENSG00000173110;ENSG00000109971;ENSG00000120694;ENSG00000112110;ENSG00000106211;ENSG00000080824;ENSG00000096384	24 (29)	1.31e-12	5.65e-09	0		0 (2)	1	1	1.31e-12	5.65e-09
1138	Zinc	ZnO NP-NM111 06h	Up	Glucocorticoid Receptor Pathway	Wikipathways	25	ENSG00000095752;ENSG00000177606;ENSG00000165997;ENSG00000170542;ENSG00000176597;ENSG00000155850;ENSG00000122862;ENSG00000140526;ENSG00000148677;ENSG00000167772;ENSG00000113742;ENSG00000179833;ENSG00000187957;ENSG00000067798;ENSG00000136802;ENSG00000110330;ENSG00000023445;ENSG00000077150;ENSG00000118503;ENSG00000115009;ENSG00000110958;ENSG00000116741;ENSG00000080824;ENSG00000043355;ENSG00000129657	66 (71)	1.75e-11	3.78e-08	0		0 (1)	1	1	1.75e-11	3.78e-08
1139	Zinc	ZnO NP-NM111 06h	Up	VEGFA-VEGFR2 Signaling Pathway	Wikipathways	48	ENSG00000150907;ENSG00000134954;ENSG00000105287;ENSG00000152661;ENSG00000177606;ENSG00000104419;ENSG00000108840;ENSG00000076555;ENSG00000149177;ENSG00000050820;ENSG00000168610;ENSG00000113070;ENSG00000109320;ENSG00000090339;ENSG00000100906;ENSG00000107338;ENSG00000153234;ENSG00000035403;ENSG00000112658;ENSG00000089159;ENSG00000106070;ENSG00000107263;ENSG00000119508;ENSG00000171132;ENSG00000162909…	220 (236)	1.62e-10	2.33e-07	0		0 (0)	1	1	1.62e-10	2.33e-07
1140	Zinc	ZnO NP-NM111 06h	Up	HSF1 activation	Reactome	15	ENSG00000105993;ENSG00000204389;ENSG00000110958;ENSG00000204390;ENSG00000146072;ENSG00000149257;ENSG00000160570;ENSG00000173110;ENSG00000004478;ENSG00000120694;ENSG00000112110;ENSG00000106211;ENSG00000080824;ENSG00000204388;ENSG00000096384	27 (31)	2.83e-10	2.54e-07	0		0 (0)	1	1	2.83e-10	2.54e-07
1141	Zinc	ZnO NP-NM111 06h	Up	Photodynamic therapy-induced HIF-1 survival signaling	Wikipathways	17	ENSG00000134333;ENSG00000141682;ENSG00000143384;ENSG00000102144;ENSG00000117394;ENSG00000146674;ENSG00000059804;ENSG00000140379;ENSG00000171552;ENSG00000135766;ENSG00000176171;ENSG00000104765;ENSG00000112715;ENSG00000146678;ENSG00000015475;ENSG00000106366;ENSG00000163235	35 (36)	2.94e-10	2.54e-07	0		0 (0)	1	1	2.94e-10	2.54e-07
1142	Zinc	ZnO NP-NM111 06h	Up	miR-targeted genes in muscle cell - TarBase	Wikipathways	60	ENSG00000198431;ENSG00000110422;ENSG00000111371;ENSG00000147459;ENSG00000152661;ENSG00000075420;ENSG00000137309;ENSG00000072682;ENSG00000139117;ENSG00000033627;ENSG00000136802;ENSG00000033867;ENSG00000172216;ENSG00000100292;ENSG00000138685;ENSG00000124067;ENSG00000186575;ENSG00000146648;ENSG00000144580;ENSG00000153250;ENSG00000135318;ENSG00000128567;ENSG00000167601;ENSG00000131018;ENSG00000110880…	319 (398)	4.85e-10	3.26e-07	0		0 (0)	1	1	4.85e-10	3.26e-07
1143	Zinc	ZnO NP-NM111 06h	Up	HSF1-dependent transactivation	Reactome	16	ENSG00000105993;ENSG00000004478;ENSG00000110958;ENSG00000204389;ENSG00000204388;ENSG00000204390;ENSG00000146072;ENSG00000149257;ENSG00000160570;ENSG00000173110;ENSG00000109971;ENSG00000120694;ENSG00000112110;ENSG00000106211;ENSG00000080824;ENSG00000096384	32 (37)	5.72e-10	3.26e-07	0		0 (4)	1	1	5.72e-10	3.26e-07
1144	Zinc	ZnO NP-NM111 06h	Up	HIF-1-alpha transcription factor network	PID	22	ENSG00000107159;ENSG00000148926;ENSG00000177606;ENSG00000129521;ENSG00000176171;ENSG00000159399;ENSG00000146678;ENSG00000104419;ENSG00000123095;ENSG00000135318;ENSG00000135766;ENSG00000106366;ENSG00000134954;ENSG00000143384;ENSG00000100292;ENSG00000134333;ENSG00000102144;ENSG00000117394;ENSG00000079739;ENSG00000166949;ENSG00000147872;ENSG00000112715	60 (67)	6.04e-10	3.26e-07	0		0 (2)	1	1	6.04e-10	3.26e-07
1145	Zinc	ZnO NP-NM111 06h	Up	EGFR1	NetPath	73	ENSG00000165895;ENSG00000136997;ENSG00000110422;ENSG00000128512;ENSG00000103404;ENSG00000152661;ENSG00000118046;ENSG00000136068;ENSG00000172059;ENSG00000105699;ENSG00000013588;ENSG00000091527;ENSG00000105976;ENSG00000150907;ENSG00000172216;ENSG00000121774;ENSG00000144791;ENSG00000111057;ENSG00000152894;ENSG00000132471;ENSG00000137575;ENSG00000168610;ENSG00000167601;ENSG00000143322;ENSG00000142627…	438 (458)	1.82e-09	8.3e-07	0		0 (4)	1	1	1.82e-09	8.3e-07
1146	Zinc	ZnO NP-NM111 06h	Up	Nuclear Receptors Meta-Pathway	Wikipathways	50	ENSG00000198431;ENSG00000197063;ENSG00000092969;ENSG00000150907;ENSG00000095752;ENSG00000136997;ENSG00000157168;ENSG00000177606;ENSG00000171223;ENSG00000173262;ENSG00000165997;ENSG00000170542;ENSG00000146678;ENSG00000131389;ENSG00000176597;ENSG00000146648;ENSG00000142627;ENSG00000155850;ENSG00000161011;ENSG00000113070;ENSG00000122862;ENSG00000140526;ENSG00000148677;ENSG00000167772;ENSG00000113742…	251 (316)	1.92e-09	8.3e-07	0		0 (0)	1	1	1.92e-09	8.3e-07
1147	Zinc	ZnO NP-NM111 06h	Up	TNF related weak inducer of apoptosis (TWEAK) Signaling Pathway	Wikipathways	16	ENSG00000131323;ENSG00000006327;ENSG00000165806;ENSG00000110330;ENSG00000023445;ENSG00000136238;ENSG00000177606;ENSG00000056558;ENSG00000127191;ENSG00000104856;ENSG00000082701;ENSG00000109320;ENSG00000077150;ENSG00000100906;ENSG00000104825;ENSG00000006062	39 (41)	2.08e-08	7.78e-06	0		0 (0)	1	1	2.08e-08	7.78e-06
1148	Zinc	ZnO NP-NM111 06h	Up	Metallothioneins bind metals	Reactome	7	ENSG00000205362;ENSG00000169688;ENSG00000198417;ENSG00000125144;ENSG00000205358;ENSG00000187193;ENSG00000125148	7 (12)	2.34e-08	7.78e-06	0		0 (4)	1	1	2.34e-08	7.78e-06
1149	Zinc	ZnO NP-NM111 06h	Up	Response to metal ions	Reactome	7	ENSG00000205362;ENSG00000169688;ENSG00000198417;ENSG00000125144;ENSG00000205358;ENSG00000187193;ENSG00000125148	7 (12)	2.34e-08	7.78e-06	0		0 (4)	1	1	2.34e-08	7.78e-06
1150	Zinc	ZnO NP-NM111 06h	Up	TNF signaling pathway - Homo sapiens (human)	KEGG	26	ENSG00000150630;ENSG00000003402;ENSG00000128342;ENSG00000168404;ENSG00000177606;ENSG00000171223;ENSG00000056558;ENSG00000127191;ENSG00000131323;ENSG00000172216;ENSG00000107968;ENSG00000109320;ENSG00000090339;ENSG00000100906;ENSG00000006062;ENSG00000184557;ENSG00000165806;ENSG00000110330;ENSG00000023445;ENSG00000128272;ENSG00000118503;ENSG00000115009;ENSG00000169032;ENSG00000034152;ENSG00000163735…	103 (110)	1.3e-07	3.5e-05	0		0 (0)	1	1	1.3e-07	3.5e-05
1151	Zinc	ZnO NP-NM111 06h	Up	Apoptosis	Wikipathways	22	ENSG00000136997;ENSG00000003402;ENSG00000177606;ENSG00000056558;ENSG00000127191;ENSG00000131323;ENSG00000104765;ENSG00000109320;ENSG00000100906;ENSG00000104825;ENSG00000146232;ENSG00000143384;ENSG00000165806;ENSG00000110330;ENSG00000023445;ENSG00000101966;ENSG00000171552;ENSG00000129473;ENSG00000120889;ENSG00000146072;ENSG00000141682;ENSG00000015475	79 (85)	1.88e-07	4.25e-05	0		0 (0)	1	1	1.88e-07	4.25e-05
1152	Zinc	ZnO NP-NM111 06h	Up	Apoptotic Signaling Pathway	Wikipathways	22	ENSG00000136997;ENSG00000003402;ENSG00000177606;ENSG00000056558;ENSG00000127191;ENSG00000131323;ENSG00000104765;ENSG00000109320;ENSG00000100906;ENSG00000104825;ENSG00000146232;ENSG00000143384;ENSG00000165806;ENSG00000110330;ENSG00000023445;ENSG00000101966;ENSG00000171552;ENSG00000129473;ENSG00000120889;ENSG00000146072;ENSG00000141682;ENSG00000015475	79 (85)	1.88e-07	4.25e-05	0		0 (0)	1	1	1.88e-07	4.25e-05
1153	Zinc	ZnO NP-NM111 06h	Up	miR-targeted genes in lymphocytes - TarBase	Wikipathways	63	ENSG00000198431;ENSG00000110422;ENSG00000111371;ENSG00000147459;ENSG00000105976;ENSG00000075420;ENSG00000185215;ENSG00000072682;ENSG00000089902;ENSG00000107968;ENSG00000033627;ENSG00000136802;ENSG00000033867;ENSG00000172216;ENSG00000100292;ENSG00000138685;ENSG00000124067;ENSG00000186575;ENSG00000146648;ENSG00000144580;ENSG00000028203;ENSG00000135318;ENSG00000167601;ENSG00000131018;ENSG00000110880…	399 (486)	1.97e-07	4.25e-05	0		0 (0)	1	1	1.97e-07	4.25e-05
1154	Zinc	ZnO NP-NM111 06h	Up	Hippo signaling pathway -multiple species - Homo sapiens (human)	KEGG	12	ENSG00000129474;ENSG00000144791;ENSG00000186575;ENSG00000151748;ENSG00000142279;ENSG00000101265;ENSG00000139926;ENSG00000213923;ENSG00000196159;ENSG00000113645;ENSG00000187079;ENSG00000150457	26 (29)	2.64e-07	5.42e-05	0		0 (0)	1	1	2.64e-07	5.42e-05
1155	Zinc	ZnO NP-NM111 06h	Up	CD40/CD40L signaling	PID	13	ENSG00000136997;ENSG00000171552;ENSG00000126561;ENSG00000023445;ENSG00000100906;ENSG00000177606;ENSG00000056558;ENSG00000127191;ENSG00000131323;ENSG00000109320;ENSG00000110330;ENSG00000118503;ENSG00000006062	32 (34)	5.16e-07	9.28e-05	0		0 (1)	1	1	5.16e-07	9.28e-05
1156	Zinc	ZnO NP-NM111 06h	Up	Apoptosis Modulation and Signaling	Wikipathways	22	ENSG00000003402;ENSG00000177606;ENSG00000131323;ENSG00000176171;ENSG00000109320;ENSG00000100906;ENSG00000151929;ENSG00000006062;ENSG00000023445;ENSG00000165806;ENSG00000110330;ENSG00000143384;ENSG00000101966;ENSG00000140379;ENSG00000171552;ENSG00000129473;ENSG00000173530;ENSG00000120889;ENSG00000204389;ENSG00000162734;ENSG00000141682;ENSG00000015475	86 (92)	9.38e-07	0.00015	0		0 (1)	1	1	9.38e-07	0.00015
1157	Zinc	ZnO NP-NM111 06h	Up	Apoptosis Modulation and Signaling	Wikipathways	22	ENSG00000003402;ENSG00000177606;ENSG00000131323;ENSG00000176171;ENSG00000109320;ENSG00000100906;ENSG00000151929;ENSG00000006062;ENSG00000023445;ENSG00000165806;ENSG00000110330;ENSG00000143384;ENSG00000101966;ENSG00000140379;ENSG00000171552;ENSG00000129473;ENSG00000173530;ENSG00000120889;ENSG00000204389;ENSG00000162734;ENSG00000141682;ENSG00000015475	86 (92)	9.38e-07	0.00015	0		0 (1)	1	1	9.38e-07	0.00015
1158	Zinc	ZnO NP-NM111 06h	Up	Apoptosis Modulation and Signaling	Wikipathways	22	ENSG00000003402;ENSG00000177606;ENSG00000131323;ENSG00000176171;ENSG00000109320;ENSG00000100906;ENSG00000151929;ENSG00000006062;ENSG00000023445;ENSG00000165806;ENSG00000110330;ENSG00000143384;ENSG00000101966;ENSG00000140379;ENSG00000171552;ENSG00000129473;ENSG00000173530;ENSG00000120889;ENSG00000204389;ENSG00000162734;ENSG00000141682;ENSG00000015475	86 (92)	9.38e-07	0.00015	0		0 (1)	1	1	9.38e-07	0.00015
1159	Zinc	ZnO NP-NM111 06h	Up	Measles - Homo sapiens (human)	KEGG	24	ENSG00000105173;ENSG00000159128;ENSG00000123595;ENSG00000107201;ENSG00000263528;ENSG00000109320;ENSG00000100906;ENSG00000104825;ENSG00000089127;ENSG00000118503;ENSG00000173530;ENSG00000120889;ENSG00000204389;ENSG00000204388;ENSG00000204390;ENSG00000173110;ENSG00000109971;ENSG00000082701;ENSG00000147065;ENSG00000168610;ENSG00000126561;ENSG00000105810;ENSG00000142166;ENSG00000159110	104 (136)	2.26e-06	0.000316	0		0 (4)	1	1	2.26e-06	0.000316
1160	Zinc	ZnO NP-NM111 06h	Up	miR-targeted genes in squamous cell - TarBase	Wikipathways	26	ENSG00000198431;ENSG00000111371;ENSG00000105976;ENSG00000075420;ENSG00000072682;ENSG00000139117;ENSG00000167601;ENSG00000186575;ENSG00000028203;ENSG00000128567;ENSG00000107968;ENSG00000104812;ENSG00000012660;ENSG00000138685;ENSG00000102531;ENSG00000112242;ENSG00000241878;ENSG00000137309;ENSG00000100292;ENSG00000120889;ENSG00000067955;ENSG00000157827;ENSG00000137575;ENSG00000106615;ENSG00000130147…	120 (159)	3.07e-06	0.000414	0		0 (0)	1	1	3.07e-06	0.000414
1161	Zinc	ZnO NP-NM111 06h	Up	MAPK Signaling Pathway	Wikipathways	30	ENSG00000136997;ENSG00000092969;ENSG00000177606;ENSG00000127191;ENSG00000213281;ENSG00000120129;ENSG00000146648;ENSG00000107968;ENSG00000106211;ENSG00000109320;ENSG00000138166;ENSG00000164086;ENSG00000006062;ENSG00000112658;ENSG00000165806;ENSG00000027075;ENSG00000146535;ENSG00000126767;ENSG00000128272;ENSG00000123358;ENSG00000069956;ENSG00000169032;ENSG00000034152;ENSG00000204389;ENSG00000109971…	153 (168)	4.84e-06	0.000633	0		0 (1)	1	1	4.84e-06	0.000633
1162	Zinc	ZnO NP-NM111 06h	Up	Cellular response to heat stress	Wikipathways	9	ENSG00000105993;ENSG00000149257;ENSG00000146072;ENSG00000160570;ENSG00000173110;ENSG00000004478;ENSG00000112110;ENSG00000106211;ENSG00000120694	12 (16)	2.69e-08	8.29e-06	0		2 (9)	1	1	4.95e-07	0.000692
1163	Zinc	ZnO NP-NM111 06h	Up	Osteoclast differentiation - Homo sapiens (human)	KEGG	23	ENSG00000092969;ENSG00000083799;ENSG00000177606;ENSG00000171223;ENSG00000127191;ENSG00000159128;ENSG00000161011;ENSG00000075426;ENSG00000109320;ENSG00000077150;ENSG00000100906;ENSG00000006062;ENSG00000184557;ENSG00000187098;ENSG00000104856;ENSG00000198053;ENSG00000132170;ENSG00000115641;ENSG00000169032;ENSG00000136238;ENSG00000175592;ENSG00000142166;ENSG00000159110	102 (132)	5.58e-06	0.000701	0		0 (3)	1	1	5.58e-06	0.000701
1164	Zinc	ZnO NP-NM111 06h	Up	Mineral absorption - Homo sapiens (human)	KEGG	9	ENSG00000170385;ENSG00000205362;ENSG00000169688;ENSG00000198417;ENSG00000125144;ENSG00000205358;ENSG00000187193;ENSG00000125148;ENSG00000100292	41 (52)	0.00496	0.109	8	HMDB00187;HMDB00162;HMDB00167;HMDB00168;HMDB00172;HMDB00159;HMDB00929;HMDB00687;HMDB13773	15 (29)	1.33e-05	0.0161	1.16e-06	0.000709
1165	Zinc	ZnO NP-NM111 06h	Up	Pathways in cancer - Homo sapiens (human)	KEGG	57	ENSG00000150630;ENSG00000136997;ENSG00000092969;ENSG00000150907;ENSG00000169429;ENSG00000105976;ENSG00000173207;ENSG00000187498;ENSG00000129521;ENSG00000056558;ENSG00000127191;ENSG00000131323;ENSG00000166949;ENSG00000134086;ENSG00000131759;ENSG00000213281;ENSG00000135766;ENSG00000146648;ENSG00000121281;ENSG00000109320;ENSG00000077150;ENSG00000100906;ENSG00000187098;ENSG00000134954;ENSG00000133101…	339 (397)	8.82e-08	2.54e-05	0		5 (27)	1	1	1.52e-06	0.000709
1166	Zinc	ZnO NP-NM111 06h	Up	Cytokine Signaling in Immune system	Reactome	60	ENSG00000006327;ENSG00000120833;ENSG00000159128;ENSG00000095752;ENSG00000128342;ENSG00000105976;ENSG00000104695;ENSG00000136068;ENSG00000084652;ENSG00000127191;ENSG00000131323;ENSG00000049249;ENSG00000107968;ENSG00000150782;ENSG00000166900;ENSG00000121060;ENSG00000213281;ENSG00000198369;ENSG00000107201;ENSG00000146648;ENSG00000168884;ENSG00000243646;ENSG00000168610;ENSG00000161011;ENSG00000113070…	371 (487)	1.66e-07	4.21e-05	0		4 (37)	1	1	2.76e-06	0.000963
1167	Zinc	ZnO NP-NM111 06h	Up	Photodynamic therapy-induced NF-kB survival signaling	Wikipathways	11	ENSG00000090339;ENSG00000003402;ENSG00000110330;ENSG00000023445;ENSG00000077150;ENSG00000104856;ENSG00000140379;ENSG00000109320;ENSG00000129473;ENSG00000169429;ENSG00000112715	29 (35)	8.72e-06	0.00102	0		0 (0)	1	1	8.72e-06	0.00102
1168	Zinc	ZnO NP-NM111 06h	Up	tnfr2 signaling pathway	BioCarta	7	ENSG00000056558;ENSG00000127191;ENSG00000131323;ENSG00000118503;ENSG00000100906;ENSG00000136560;ENSG00000006062	12 (13)	1.29e-05	0.00142	0		0 (1)	1	1	1.29e-05	0.00142
1169	Zinc	ZnO NP-NM111 06h	Up	Cellular responses to stress	Reactome	56	ENSG00000198431;ENSG00000105173;ENSG00000134086;ENSG00000105993;ENSG00000177606;ENSG00000129521;ENSG00000112110;ENSG00000172216;ENSG00000139112;ENSG00000004478;ENSG00000144791;ENSG00000149948;ENSG00000197548;ENSG00000142279;ENSG00000164070;ENSG00000183741;ENSG00000149196;ENSG00000155876;ENSG00000225217;ENSG00000160570;ENSG00000109320;ENSG00000135766;ENSG00000120694;ENSG00000151929;ENSG00000134954…	345 (393)	3.85e-07	7.55e-05	0		8 (47)	1	1	6.07e-06	0.00159
1170	Zinc	ZnO NP-NM111 06h	Up	TNF alpha Signaling Pathway	Wikipathways	23	ENSG00000003402;ENSG00000177606;ENSG00000056558;ENSG00000127191;ENSG00000136560;ENSG00000213281;ENSG00000107968;ENSG00000109320;ENSG00000077150;ENSG00000100906;ENSG00000104825;ENSG00000146232;ENSG00000006062;ENSG00000165806;ENSG00000110330;ENSG00000023445;ENSG00000092871;ENSG00000171552;ENSG00000118503;ENSG00000034152;ENSG00000136238;ENSG00000080824;ENSG00000015475	89 (93)	4.37e-07	8.2e-05	0		1 (3)	1	1	6.83e-06	0.00159
1171	Zinc	ZnO NP-NM111 06h	Up	TNFalpha	NetPath	38	ENSG00000150907;ENSG00000003402;ENSG00000177606;ENSG00000171223;ENSG00000084652;ENSG00000127191;ENSG00000131323;ENSG00000136560;ENSG00000116809;ENSG00000101255;ENSG00000146648;ENSG00000263528;ENSG00000152256;ENSG00000107968;ENSG00000168884;ENSG00000109320;ENSG00000077150;ENSG00000100906;ENSG00000104825;ENSG00000146232;ENSG00000006062;ENSG00000165806;ENSG00000110330;ENSG00000023445;ENSG00000101966…	229 (241)	1.76e-05	0.00186	0		0 (1)	1	1	1.76e-05	0.00186
1172	Zinc	ZnO NP-NM111 06h	Up	TWEAK	NetPath	10	ENSG00000006327;ENSG00000110330;ENSG00000077150;ENSG00000056558;ENSG00000127191;ENSG00000131323;ENSG00000082701;ENSG00000109320;ENSG00000136238;ENSG00000100906	26 (28)	1.95e-05	0.00201	0		0 (0)	1	1	1.95e-05	0.00201
1173	Zinc	ZnO NP-NM111 06h	Up	RANKL-RANK (Receptor activator of NFKB (ligand)) Signaling Pathway	Wikipathways	14	ENSG00000131323;ENSG00000115641;ENSG00000169032;ENSG00000090339;ENSG00000177606;ENSG00000161011;ENSG00000136238;ENSG00000056558;ENSG00000127191;ENSG00000104856;ENSG00000109320;ENSG00000077150;ENSG00000100906;ENSG00000187098	49 (55)	2.33e-05	0.00234	0		0 (2)	1	1	2.33e-05	0.00234
1174	Zinc	ZnO NP-NM111 06h	Up	Direct p53 effectors	PID	26	ENSG00000128342;ENSG00000105976;ENSG00000177606;ENSG00000104765;ENSG00000116017;ENSG00000104419;ENSG00000146674;ENSG00000146648;ENSG00000142627;ENSG00000120129;ENSG00000168209;ENSG00000138166;ENSG00000106366;ENSG00000143384;ENSG00000101412;ENSG00000112242;ENSG00000140379;ENSG00000171552;ENSG00000129473;ENSG00000173530;ENSG00000120889;ENSG00000204389;ENSG00000204388;ENSG00000141682;ENSG00000015475…	135 (147)	2.85e-05	0.0028	0		0 (1)	1	1	2.85e-05	0.0028
1175	Zinc	ZnO NP-NM111 06h	Up	Photodynamic therapy-induced AP-1 survival signaling.	Wikipathways	13	ENSG00000105173;ENSG00000146648;ENSG00000003402;ENSG00000034152;ENSG00000143384;ENSG00000177606;ENSG00000171223;ENSG00000113070;ENSG00000126767;ENSG00000171552;ENSG00000080824;ENSG00000127191;ENSG00000015475	44 (50)	3.07e-05	0.00295	0		0 (0)	1	1	3.07e-05	0.00295
1176	Zinc	ZnO NP-NM111 06h	Up	Immune System	Reactome	161	ENSG00000083799;ENSG00000095752;ENSG00000109046;ENSG00000188766;ENSG00000109466;ENSG00000157168;ENSG00000153395;ENSG00000127191;ENSG00000131323;ENSG00000049249;ENSG00000150782;ENSG00000033627;ENSG00000243646;ENSG00000121060;ENSG00000198369;ENSG00000080815;ENSG00000206503;ENSG00000107201;ENSG00000122574;ENSG00000176407;ENSG00000123908;ENSG00000134070;ENSG00000198053;ENSG00000171552;ENSG00000123358…	1396 (1950)	1.09e-06	0.000168	0		12 (149)	1	1	1.61e-05	0.00321
1177	Zinc	ZnO NP-NM111 06h	Up	Cellular response to heat stress	Reactome	23	ENSG00000160570;ENSG00000112110;ENSG00000004478;ENSG00000164070;ENSG00000149196;ENSG00000120694;ENSG00000151929;ENSG00000105993;ENSG00000139496;ENSG00000149257;ENSG00000110958;ENSG00000204390;ENSG00000146072;ENSG00000204389;ENSG00000170606;ENSG00000173110;ENSG00000225217;ENSG00000109971;ENSG00000204388;ENSG00000106211;ENSG00000082701;ENSG00000080824;ENSG00000096384	95 (100)	1.52e-06	0.000226	0		2 (9)	1	1	2.18e-05	0.00382
1178	Zinc	ZnO NP-NM111 06h	Up	Epstein-Barr virus infection - Homo sapiens (human)	KEGG	31	ENSG00000136997;ENSG00000243646;ENSG00000177606;ENSG00000056558;ENSG00000127191;ENSG00000131323;ENSG00000108840;ENSG00000206503;ENSG00000107201;ENSG00000109320;ENSG00000090339;ENSG00000100906;ENSG00000104825;ENSG00000146232;ENSG00000006062;ENSG00000133101;ENSG00000077150;ENSG00000104856;ENSG00000118503;ENSG00000034152;ENSG00000204389;ENSG00000204388;ENSG00000204390;ENSG00000170027;ENSG00000173110…	179 (204)	4.49e-05	0.00402	0		0 (3)	1	1	4.49e-05	0.00402
1179	Zinc	ZnO NP-NM111 06h	Up	Focal adhesion - Homo sapiens (human)	KEGG	30	ENSG00000150630;ENSG00000187498;ENSG00000101608;ENSG00000167193;ENSG00000105976;ENSG00000100852;ENSG00000177606;ENSG00000146648;ENSG00000107263;ENSG00000162909;ENSG00000089159;ENSG00000110330;ENSG00000023445;ENSG00000101966;ENSG00000058085;ENSG00000136068;ENSG00000126767;ENSG00000164171;ENSG00000050820;ENSG00000169032;ENSG00000118680;ENSG00000119630;ENSG00000082781;ENSG00000159840;ENSG00000105855…	171 (201)	4.63e-05	0.00402	0		0 (2)	1	1	4.63e-05	0.00402
1180	Zinc	ZnO NP-NM111 06h	Up	NOD-like receptor signaling pathway - Homo sapiens (human)	KEGG	26	ENSG00000169429;ENSG00000177606;ENSG00000127191;ENSG00000131323;ENSG00000150782;ENSG00000136560;ENSG00000139112;ENSG00000263528;ENSG00000109320;ENSG00000100906;ENSG00000104825;ENSG00000096433;ENSG00000151414;ENSG00000169604;ENSG00000110330;ENSG00000023445;ENSG00000101966;ENSG00000089127;ENSG00000110218;ENSG00000171552;ENSG00000118503;ENSG00000096384;ENSG00000125826;ENSG00000080824;ENSG00000142166…	139 (170)	4.82e-05	0.00402	0		0 (15)	1	1	4.82e-05	0.00402
1181	Zinc	ZnO NP-NM111 06h	Up	RIPK1-mediated regulated necrosis	Reactome	7	ENSG00000168404;ENSG00000003402;ENSG00000110330;ENSG00000023445;ENSG00000101966;ENSG00000127191;ENSG00000120889	14 (16)	4.82e-05	0.00402	0		0 (6)	1	1	4.82e-05	0.00402
1182	Zinc	ZnO NP-NM111 06h	Up	Regulated Necrosis	Reactome	7	ENSG00000168404;ENSG00000003402;ENSG00000110330;ENSG00000023445;ENSG00000101966;ENSG00000127191;ENSG00000120889	14 (16)	4.82e-05	0.00402	0		0 (6)	1	1	4.82e-05	0.00402
1183	Zinc	ZnO NP-NM111 06h	Up	Legionellosis - Homo sapiens (human)	KEGG	14	ENSG00000144381;ENSG00000169896;ENSG00000150782;ENSG00000204389;ENSG00000165806;ENSG00000204390;ENSG00000173110;ENSG00000109971;ENSG00000100906;ENSG00000169429;ENSG00000109320;ENSG00000077150;ENSG00000176171;ENSG00000204388	52 (55)	4.84e-05	0.00402	0		0 (2)	1	1	4.84e-05	0.00402
1184	Zinc	ZnO NP-NM111 06h	Up	Hepatitis C and Hepatocellular Carcinoma	Wikipathways	13	ENSG00000136997;ENSG00000109320;ENSG00000165806;ENSG00000168610;ENSG00000023445;ENSG00000128567;ENSG00000177606;ENSG00000169429;ENSG00000160293;ENSG00000171552;ENSG00000136238;ENSG00000166949;ENSG00000112715	46 (50)	5.16e-05	0.00421	0		0 (0)	1	1	5.16e-05	0.00421
1185	Zinc	ZnO NP-NM111 06h	Up	Regulation of HSF1-mediated heat shock response	Reactome	20	ENSG00000105993;ENSG00000109971;ENSG00000204389;ENSG00000164070;ENSG00000204390;ENSG00000146072;ENSG00000149257;ENSG00000170606;ENSG00000149196;ENSG00000173110;ENSG00000225217;ENSG00000004478;ENSG00000204388;ENSG00000112110;ENSG00000106211;ENSG00000082701;ENSG00000160570;ENSG00000120694;ENSG00000139496;ENSG00000151929	77 (81)	2.26e-06	0.000316	0		2 (7)	1	1	3.16e-05	0.00461
1186	Zinc	ZnO NP-NM111 06h	Up	Amino acid transport across the plasma membrane	Reactome	5	ENSG00000103064;ENSG00000111371;ENSG00000139514;ENSG00000123643;ENSG00000131389	22 (31)	0.0292	0.304	9	HMDB00162;HMDB00168;HMDB00172;HMDB03406;HMDB00159;HMDB00929;HMDB06055;HMDB00158;HMDB00687;HMDB13773	23 (32)	8.08e-05	0.0161	3.3e-05	0.00461
1187	Zinc	ZnO NP-NM111 06h	Up	Prolactin Signaling Pathway	Wikipathways	17	ENSG00000126767;ENSG00000136997;ENSG00000120833;ENSG00000169032;ENSG00000089159;ENSG00000168610;ENSG00000170027;ENSG00000177606;ENSG00000126561;ENSG00000160293;ENSG00000082701;ENSG00000198053;ENSG00000109320;ENSG00000136238;ENSG00000100906;ENSG00000104825;ENSG00000184557	73 (76)	5.95e-05	0.00476	0		0 (0)	1	1	5.95e-05	0.00476
1188	Zinc	ZnO NP-NM111 06h	Up	Adipogenesis	Wikipathways	22	ENSG00000150907;ENSG00000128342;ENSG00000131759;ENSG00000003137;ENSG00000118263;ENSG00000149187;ENSG00000172216;ENSG00000152601;ENSG00000184557;ENSG00000106366;ENSG00000107485;ENSG00000106546;ENSG00000101255;ENSG00000101412;ENSG00000126561;ENSG00000137309;ENSG00000132170;ENSG00000116016;ENSG00000168610;ENSG00000166949;ENSG00000147872;ENSG00000176692	110 (131)	6.42e-05	0.00504	0		0 (0)	1	1	6.42e-05	0.00504
1189	Zinc	ZnO NP-NM111 06h	Up	Tacrolimus/Cyclosporine Pathway_ Pharmacodynamics	PharmGKB	12	ENSG00000197063;ENSG00000034152;ENSG00000198517;ENSG00000140044;ENSG00000177606;ENSG00000171223;ENSG00000075426;ENSG00000185022;ENSG00000109320;ENSG00000077150;ENSG00000104856;ENSG00000175592	41 (44)	6.86e-05	0.00529	0		0 (2)	1	1	6.86e-05	0.00529
1190	Zinc	ZnO NP-NM111 06h	Up	Central carbon metabolism in cancer - Homo sapiens (human)	KEGG	12	ENSG00000136997;ENSG00000134333;ENSG00000146648;ENSG00000171314;ENSG00000105976;ENSG00000152256;ENSG00000117394;ENSG00000077782;ENSG00000169032;ENSG00000159399;ENSG00000213281;ENSG00000067057	58 (67)	0.00214	0.0652	8	HMDB00187;HMDB00162;HMDB00168;HMDB00172;HMDB00159;HMDB00929;HMDB00158;HMDB00687;HMDB13773	27 (37)	0.00191	0.141	5.49e-05	0.00697
1191	Zinc	ZnO NP-NM111 06h	Up	Influenza A - Homo sapiens (human)	KEGG	25	ENSG00000159128;ENSG00000177606;ENSG00000150782;ENSG00000121060;ENSG00000107201;ENSG00000263528;ENSG00000109320;ENSG00000090339;ENSG00000100906;ENSG00000104825;ENSG00000184557;ENSG00000089127;ENSG00000173530;ENSG00000120889;ENSG00000169032;ENSG00000034152;ENSG00000204389;ENSG00000204388;ENSG00000204390;ENSG00000173110;ENSG00000109971;ENSG00000082701;ENSG00000169429;ENSG00000142166;ENSG00000159110	138 (175)	0.000115	0.00801	0		0 (3)	1	1	0.000115	0.00801
1192	Zinc	ZnO NP-NM111 06h	Up	Downstream signaling in na&#xef;ve CD8+ T cells	PID	11	ENSG00000206503;ENSG00000169032;ENSG00000175592;ENSG00000177606;ENSG00000171223;ENSG00000171132;ENSG00000126767;ENSG00000049249;ENSG00000213281;ENSG00000142166;ENSG00000159110	37 (68)	0.000118	0.00806	0		0 (9)	1	1	0.000118	0.00806
1193	Zinc	ZnO NP-NM111 06h	Up	Signaling by PTK6	Reactome	17	ENSG00000121774;ENSG00000105173;ENSG00000146648;ENSG00000089159;ENSG00000184557;ENSG00000157168;ENSG00000168610;ENSG00000166068;ENSG00000075391;ENSG00000188766;ENSG00000116016;ENSG00000167193;ENSG00000136238;ENSG00000113070;ENSG00000050820;ENSG00000213281;ENSG00000198369	62 (68)	5.84e-06	0.000701	0		1 (8)	1	1	7.63e-05	0.0082
1194	Zinc	ZnO NP-NM111 06h	Up	Renal cell carcinoma - Homo sapiens (human)	KEGG	17	ENSG00000134954;ENSG00000092969;ENSG00000154803;ENSG00000134086;ENSG00000105976;ENSG00000135766;ENSG00000177606;ENSG00000107263;ENSG00000129521;ENSG00000117394;ENSG00000116016;ENSG00000167193;ENSG00000136238;ENSG00000169032;ENSG00000213281;ENSG00000112715;ENSG00000163235	62 (67)	5.84e-06	0.000701	0		1 (3)	1	1	7.63e-05	0.0082
1195	Zinc	ZnO NP-NM111 06h	Up	ErbB Signaling Pathway	Wikipathways	13	ENSG00000136997;ENSG00000169032;ENSG00000150907;ENSG00000152256;ENSG00000157168;ENSG00000177606;ENSG00000113070;ENSG00000126767;ENSG00000082701;ENSG00000167193;ENSG00000126561;ENSG00000146648;ENSG00000163235	50 (55)	0.000133	0.00895	0		0 (2)	1	1	0.000133	0.00895
1196	Zinc	ZnO NP-NM111 06h	Up	JAK STAT MolecularVariation 1	INOH	14	ENSG00000159128;ENSG00000169429;ENSG00000128342;ENSG00000168610;ENSG00000095752;ENSG00000196083;ENSG00000077238;ENSG00000084652;ENSG00000150782;ENSG00000126561;ENSG00000243646;ENSG00000145623;ENSG00000142166;ENSG00000159110	57 (98)	0.000144	0.00925	0		0 (3)	1	1	0.000144	0.00925
1197	Zinc	ZnO NP-NM111 06h	Up	LPA receptor mediated events	PID	14	ENSG00000113070;ENSG00000146648;ENSG00000089159;ENSG00000121281;ENSG00000177606;ENSG00000171132;ENSG00000146535;ENSG00000100906;ENSG00000082701;ENSG00000109320;ENSG00000136238;ENSG00000169429;ENSG00000167193;ENSG00000050820	57 (65)	0.000144	0.00925	0		0 (5)	1	1	0.000144	0.00925
1198	Zinc	ZnO NP-NM111 06h	Up	HIF-2-alpha transcription factor network	PID	10	ENSG00000134954;ENSG00000134086;ENSG00000116016;ENSG00000102144;ENSG00000129521;ENSG00000117394;ENSG00000126767;ENSG00000112715;ENSG00000135766;ENSG00000106366	32 (36)	0.000151	0.00946	0		0 (2)	1	1	0.000151	0.00946
1199	Zinc	ZnO NP-NM111 06h	Up	Validated transcriptional targets of AP1 family members Fra1 and Fra2	PID	10	ENSG00000128342;ENSG00000152661;ENSG00000177606;ENSG00000171223;ENSG00000011422;ENSG00000075426;ENSG00000128272;ENSG00000169429;ENSG00000100292;ENSG00000175592	32 (38)	0.000151	0.00946	0		0 (2)	1	1	0.000151	0.00946
1200	Zinc	ZnO NP-NM111 06h	Up	Gastrin	NetPath	11	ENSG00000146648;ENSG00000089159;ENSG00000168610;ENSG00000132170;ENSG00000177606;ENSG00000082701;ENSG00000109320;ENSG00000105287;ENSG00000100906;ENSG00000169032;ENSG00000050820	38 (41)	0.000153	0.00947	0		0 (0)	1	1	0.000153	0.00947
1201	Zinc	ZnO NP-NM111 06h	Up	Focal Adhesion	Wikipathways	28	ENSG00000150630;ENSG00000187498;ENSG00000167193;ENSG00000105976;ENSG00000100852;ENSG00000177606;ENSG00000164171;ENSG00000146648;ENSG00000110330;ENSG00000089159;ENSG00000107263;ENSG00000023445;ENSG00000101966;ENSG00000058085;ENSG00000126767;ENSG00000169896;ENSG00000050820;ENSG00000069956;ENSG00000169032;ENSG00000034152;ENSG00000119630;ENSG00000082781;ENSG00000159840;ENSG00000105855;ENSG00000082701…	166 (190)	0.000166	0.01	0		0 (0)	1	1	0.000166	0.01
1202	Zinc	ZnO NP-NM111 06h	Up	Prolactin	NetPath	15	ENSG00000120833;ENSG00000146648;ENSG00000089159;ENSG00000168610;ENSG00000170027;ENSG00000177606;ENSG00000100906;ENSG00000160293;ENSG00000082701;ENSG00000198053;ENSG00000109320;ENSG00000126561;ENSG00000169032;ENSG00000151090;ENSG00000184557	65 (70)	0.000178	0.0101	0		0 (0)	1	1	0.000178	0.0101
1203	Zinc	ZnO NP-NM111 06h	Up	Apoptosis-related network due to altered Notch3 in ovarian cancer	Wikipathways	13	ENSG00000144381;ENSG00000134954;ENSG00000165806;ENSG00000146072;ENSG00000157168;ENSG00000161011;ENSG00000056558;ENSG00000106211;ENSG00000164111;ENSG00000109320;ENSG00000120889;ENSG00000101665;ENSG00000184557	52 (53)	0.000204	0.0113	0		0 (0)	1	1	0.000204	0.0113
1204	Zinc	ZnO NP-NM111 06h	Up	Regulation of TNFR1 signaling	Reactome	8	ENSG00000125826;ENSG00000083799;ENSG00000110330;ENSG00000023445;ENSG00000101966;ENSG00000056558;ENSG00000127191;ENSG00000118503	22 (23)	0.000215	0.0113	0		0 (2)	1	1	0.000215	0.0113
1205	Zinc	ZnO NP-NM111 06h	Up	tumor suppressor arf inhibits ribosomal biogenesis	BioCarta	8	ENSG00000136997;ENSG00000204389;ENSG00000204388;ENSG00000101412;ENSG00000136238;ENSG00000080824;ENSG00000104825;ENSG00000121068	22 (24)	0.000215	0.0113	0		0 (0)	1	1	0.000215	0.0113
1206	Zinc	ZnO NP-NM111 06h	Up	EBV LMP1 signaling	Wikipathways	8	ENSG00000056558;ENSG00000006062;ENSG00000100906;ENSG00000169429;ENSG00000109320;ENSG00000077150;ENSG00000080824;ENSG00000115009	22 (23)	0.000215	0.0113	0		0 (0)	1	1	0.000215	0.0113
1207	Zinc	ZnO NP-NM111 06h	Up	T helper 17 (Th17) targets (ROYAN institute)	Wikipathways	7	ENSG00000107485;ENSG00000106546;ENSG00000134954;ENSG00000075426;ENSG00000168610;ENSG00000132170;ENSG00000184557	17 (19)	0.00022	0.0114	0		0 (0)	1	1	0.00022	0.0114
1208	Zinc	ZnO NP-NM111 06h	Up	Cytokine-cytokine receptor interaction - Homo sapiens (human)	KEGG	26	ENSG00000150630;ENSG00000092969;ENSG00000243646;ENSG00000095752;ENSG00000128342;ENSG00000105976;ENSG00000006327;ENSG00000049249;ENSG00000150782;ENSG00000159128;ENSG00000146648;ENSG00000145623;ENSG00000241839;ENSG00000173530;ENSG00000120889;ENSG00000115009;ENSG00000054967;ENSG00000196083;ENSG00000163735;ENSG00000006606;ENSG00000146072;ENSG00000077238;ENSG00000112715;ENSG00000169429;ENSG00000142166…	152 (265)	0.000223	0.0115	0		0 (0)	1	1	0.000223	0.0115
1209	Zinc	ZnO NP-NM111 06h	Up	Toxoplasmosis - Homo sapiens (human)	KEGG	19	ENSG00000092969;ENSG00000243646;ENSG00000171552;ENSG00000034152;ENSG00000204389;ENSG00000204388;ENSG00000110330;ENSG00000108179;ENSG00000101966;ENSG00000159128;ENSG00000173110;ENSG00000109320;ENSG00000109971;ENSG00000058085;ENSG00000168610;ENSG00000204390;ENSG00000100906;ENSG00000104825;ENSG00000023445	96 (118)	0.00023	0.0116	0		0 (3)	1	1	0.00023	0.0116
1210	Zinc	ZnO NP-NM111 06h	Up	Zinc homeostasis	Wikipathways	9	ENSG00000170385;ENSG00000158014;ENSG00000205362;ENSG00000169688;ENSG00000198417;ENSG00000125144;ENSG00000205358;ENSG00000187193;ENSG00000125148	28 (37)	0.000255	0.0127	0		0 (1)	1	1	0.000255	0.0127
1211	Zinc	ZnO NP-NM111 06h	Up	MAPK signaling pathway - Homo sapiens (human)	KEGG	37	ENSG00000136997;ENSG00000092969;ENSG00000136068;ENSG00000133818;ENSG00000127191;ENSG00000213281;ENSG00000146648;ENSG00000107968;ENSG00000106211;ENSG00000109320;ENSG00000077150;ENSG00000111266;ENSG00000120129;ENSG00000006062;ENSG00000112658;ENSG00000138685;ENSG00000138166;ENSG00000177606;ENSG00000146535;ENSG00000126767;ENSG00000104856;ENSG00000077782;ENSG00000158711;ENSG00000164086;ENSG00000123358…	216 (255)	1.09e-05	0.00124	0		1 (5)	1	1	0.000136	0.0135
1212	Zinc	ZnO NP-NM111 06h	Up	Focal Adhesion-PI3K-Akt-mTOR-signaling pathway	Wikipathways	36	ENSG00000150630;ENSG00000187498;ENSG00000150907;ENSG00000105976;ENSG00000118046;ENSG00000104695;ENSG00000168209;ENSG00000128272;ENSG00000184349;ENSG00000213281;ENSG00000146648;ENSG00000142627;ENSG00000116016;ENSG00000096384;ENSG00000104812;ENSG00000138685;ENSG00000058085;ENSG00000077782;ENSG00000123836;ENSG00000164171;ENSG00000145623;ENSG00000169032;ENSG00000119630;ENSG00000082781;ENSG00000077238…	242 (301)	0.000289	0.0139	0		0 (0)	1	1	0.000289	0.0139
1213	Zinc	ZnO NP-NM111 06h	Up	TNF receptor superfamily (TNFSF) members mediating non-canonical NF-kB pathway	Reactome	6	ENSG00000006327;ENSG00000110330;ENSG00000023445;ENSG00000127191;ENSG00000131323;ENSG00000006062	13 (18)	0.000301	0.0143	0		0 (0)	1	1	0.000301	0.0143
[truncated: 1,354 more rows]
