# Supplementary material for: Multi-omics approaches confirm metal ions mediate the main toxicological pathways of metal-bearing nanoparticles in lung epithelial A549 cells
Source: Royal Society of Chemistry journal article supplement (doi:10.1039/c8en00071a), 2018-01-01
Supplement: c8en00071a7.xlsx [file c8en00071a7.xlsx]

## Sheet: Sheet1
ESI 7: Candidate nano-specific molecular responses
Molecular responses classified as 'candidate nanospecific responses'
Candidate responses were selected as significantly changed over all timepoints when comparing treatments (nanomaterial v control) AND (nanomaterial v ionic) AND (nanomaterial v microparticle)
The direction of change, that had to be consistent in all 3 comparisons, is shown as 'Up' or 'Down'.
Supplementary material of:
Susan Dekkers*1, Tim D. Williams*2, Jinkang Zhang2, Jiarui (Albert) Zhou3, Rob J. Vandebriel1, Liset J.J. De La Fonteyne1, Eric R. Gremmer1, Shan He3, Emily J. Guggenheim4, Iseult Lynch4, Flemming R. Cassee1,5, Wim H. De Jong1, Mark R. Viant2
Multi-omics approaches confirm metal ions mediate the main toxicological pathways of metal-bearing nanoparticles in lung epithelial A549 cells.
Environmental Science Nano. Corresponding author: susan.dekkers@rivm.nl.
No	Experiment	Technology	Nanomaterial	Peak m/z or Ensembl Gene ID	Direction	Name(s)	Empirical Formulae or Gene Symbol	HMDB IDs	LipidMAPs IDs					No	Experiment	Nanomaterial	Direction	pathway_name	pathway_source	num_overlapping_genes	overlapping_genes	num_all_pathway_genes	P_genes	Q_genes	num_overlapping_metabolites	overlapping_metabolites	num_all_pathway_metabolites	P_metabolites	Q_metabolites	P_joint	Q_joint
1	Silver	Lipidomics	Ag NP-NM300K	694.394	Up									1	Silver	Ag NP-NM300K	Up	<i>S</i>-methyl-5-thio-&alpha;-D-ribose 1-phosphate degradation	HumanCyc	1	ENSG00000145293	4 (4)	0.0233	1	11	HMDB00187;HMDB00696;HMDB00167;HMDB00168;HMDB00123;HMDB00172;HMDB00159;HMDB00929;HMDB00158;HMDB00687#HMDB13773;HMDB00177	23 (35)	5.27e-07	0.000308	2.36e-07	0.000165
2	Silver	Lipidomics	Ag NP-NM300K	537.27	Up									2	Silver	Ag NP-NM300K	Up	Class I MHC mediated antigen processing & presentation	Wikipathways	0		0 (0)	1	1	11	HMDB00187;HMDB00696;HMDB00167;HMDB00168;HMDB00123;HMDB00172;HMDB00159;HMDB00929;HMDB00158;HMDB00687#HMDB13773;HMDB00177	21 (35)	1.57e-07	0.000209	1.57e-07	0.000209
3	Silver	Lipidomics	Ag NP-NM300K	359.166	Up									3	Silver	Ag NP-NM300K	Up	tRNA Aminoacylation	Wikipathways	0		0 (0)	1	1	11	HMDB00187;HMDB00696;HMDB00167;HMDB00168;HMDB00123;HMDB00172;HMDB00159;HMDB00929;HMDB00158;HMDB00687#HMDB13773;HMDB00177	21 (26)	1.57e-07	0.000209	1.57e-07	0.000209
4	Silver	Lipidomics	Ag NP-NM300K	558.447	Up	Cer(d18:2/15:0)	C33H63NO3		LMSP02010023					4	Silver	Ag NP-NM300K	Up	Amino Acid interconversion	Wikipathways	0		0 (0)	1	1	13	HMDB00187;HMDB00696;HMDB00719;HMDB00167;HMDB00725;HMDB00168;HMDB00123;HMDB00172;HMDB00159;HMDB00929;HMDB00158;HMDB00687#HMDB13773;HMDB00177	36 (51)	2.12e-06	0.000308	2.12e-06	0.000308
5	Silver	Polar Metabolomics	Ag NP-NM300K	319.136	Up									5	Silver	Ag NP-NM300K	Up	Roxithromycin Action Pathway	SMPDB	0		0 (0)	1	1	7	HMDB00696;HMDB00167;HMDB00168;HMDB03406;HMDB00172;HMDB00687#HMDB13773;HMDB00177	10 (20)	2.86e-06	0.000308	2.86e-06	0.000308
6	Silver	Polar Metabolomics	Ag NP-NM300K	484.361	Up									6	Silver	Ag NP-NM300K	Up	Josamycin Action Pathway	SMPDB	0		0 (0)	1	1	7	HMDB00696;HMDB00167;HMDB00168;HMDB03406;HMDB00172;HMDB00687#HMDB13773;HMDB00177	10 (20)	2.86e-06	0.000308	2.86e-06	0.000308
7	Silver	Polar Metabolomics	Ag NP-NM300K	463.383	Up									7	Silver	Ag NP-NM300K	Up	Tigecycline Action Pathway	SMPDB	0		0 (0)	1	1	7	HMDB00696;HMDB00167;HMDB00168;HMDB03406;HMDB00172;HMDB00687#HMDB13773;HMDB00177	10 (20)	2.86e-06	0.000308	2.86e-06	0.000308
8	Silver	Polar Metabolomics	Ag NP-NM300K	256.98	Up									8	Silver	Ag NP-NM300K	Up	Arbekacin Action Pathway	SMPDB	0		0 (0)	1	1	7	HMDB00696;HMDB00167;HMDB00168;HMDB03406;HMDB00172;HMDB00687#HMDB13773;HMDB00177	10 (20)	2.86e-06	0.000308	2.86e-06	0.000308
9	Silver	Polar Metabolomics	Ag NP-NM300K	315.136	Up	Cyclandelate, [8]-Shogaol, Panaquinquecol 2, Ginsenoyne C, Ginsenoyne K, Panaquinquecol 7	C17H24O3	HMDB15586;HMDB31463;HMDB38938;HMDB38994;HMDB40375;HMDB41201						9	Silver	Ag NP-NM300K	Up	Paromomycin Action Pathway	SMPDB	0		0 (0)	1	1	7	HMDB00696;HMDB00167;HMDB00168;HMDB03406;HMDB00172;HMDB00687#HMDB13773;HMDB00177	10 (20)	2.86e-06	0.000308	2.86e-06	0.000308
10	Silver	Polar Metabolomics	Ag NP-NM300K	315.193	Up	[(2E,4Z,7Z,8E)-Colnelenic acid, Panaquinquecol 1, [7]-Paradol	C18H28O3	HMDB30996;HMDB38035;HMDB40806						10	Silver	Ag NP-NM300K	Up	Oxytetracycline Action Pathway	SMPDB	0		0 (0)	1	1	7	HMDB00696;HMDB00167;HMDB00168;HMDB03406;HMDB00172;HMDB00687#HMDB13773;HMDB00177	10 (20)	2.86e-06	0.000308	2.86e-06	0.000308
11	Silver	Polar Metabolomics	Ag NP-NM300K	134.027	Up									11	Silver	Ag NP-NM300K	Up	Clomocycline Action Pathway	SMPDB	0		0 (0)	1	1	7	HMDB00696;HMDB00167;HMDB00168;HMDB03406;HMDB00172;HMDB00687#HMDB13773;HMDB00177	10 (20)	2.86e-06	0.000308	2.86e-06	0.000308
12	Silver	Polar Metabolomics	Ag NP-NM300K	274.99	Up	Cyclobrassinin	C11H10N2S2	HMDB33352						12	Silver	Ag NP-NM300K	Up	Lincomycin Action Pathway	SMPDB	0		0 (0)	1	1	7	HMDB00696;HMDB00167;HMDB00168;HMDB03406;HMDB00172;HMDB00687#HMDB13773;HMDB00177	10 (20)	2.86e-06	0.000308	2.86e-06	0.000308
13	Silver	Polar Metabolomics	Ag NP-NM300K	134.064	Up									13	Silver	Ag NP-NM300K	Up	Methacycline Action Pathway	SMPDB	0		0 (0)	1	1	7	HMDB00696;HMDB00167;HMDB00168;HMDB03406;HMDB00172;HMDB00687#HMDB13773;HMDB00177	10 (20)	2.86e-06	0.000308	2.86e-06	0.000308
14	Silver	Polar Metabolomics	Ag NP-NM300K	293.879	Up									14	Silver	Ag NP-NM300K	Up	Rolitetracycline Action Pathway	SMPDB	0		0 (0)	1	1	7	HMDB00696;HMDB00167;HMDB00168;HMDB03406;HMDB00172;HMDB00687#HMDB13773;HMDB00177	10 (20)	2.86e-06	0.000308	2.86e-06	0.000308
15	Silver	Polar Metabolomics	Ag NP-NM300K	133.069	Up									15	Silver	Ag NP-NM300K	Up	Spectinomycin Action Pathway	SMPDB	0		0 (0)	1	1	7	HMDB00696;HMDB00167;HMDB00168;HMDB03406;HMDB00172;HMDB00687#HMDB13773;HMDB00177	10 (20)	2.86e-06	0.000308	2.86e-06	0.000308
16	Silver	Polar Metabolomics	Ag NP-NM300K	300.165	Up									16	Silver	Ag NP-NM300K	Up	Kanamycin Action Pathway	SMPDB	0		0 (0)	1	1	7	HMDB00696;HMDB00167;HMDB00168;HMDB03406;HMDB00172;HMDB00687#HMDB13773;HMDB00177	10 (20)	2.86e-06	0.000308	2.86e-06	0.000308
17	Silver	Polar Metabolomics	Ag NP-NM300K	177.962	Up									17	Silver	Ag NP-NM300K	Up	Gentamicin Action Pathway	SMPDB	0		0 (0)	1	1	7	HMDB00696;HMDB00167;HMDB00168;HMDB03406;HMDB00172;HMDB00687#HMDB13773;HMDB00177	10 (20)	2.86e-06	0.000308	2.86e-06	0.000308
18	Silver	Polar Metabolomics	Ag NP-NM300K	237.918	Up									18	Silver	Ag NP-NM300K	Up	Netilmicin Action Pathway	SMPDB	0		0 (0)	1	1	7	HMDB00696;HMDB00167;HMDB00168;HMDB03406;HMDB00172;HMDB00687#HMDB13773;HMDB00177	10 (20)	2.86e-06	0.000308	2.86e-06	0.000308
19	Silver	Polar Metabolomics	Ag NP-NM300K	133.061	Up	Ureidopropionic acid, L-Asparagine, Glycyl-glycine, N-Carbamoylsarcosine, D-Asparagine	C4H8N2O3	HMDB00026;HMDB00168;HMDB11733;HMDB12265;HMDB33780						19	Silver	Ag NP-NM300K	Up	Neomycin Action Pathway	SMPDB	0		0 (0)	1	1	7	HMDB00696;HMDB00167;HMDB00168;HMDB03406;HMDB00172;HMDB00687#HMDB13773;HMDB00177	10 (20)	2.86e-06	0.000308	2.86e-06	0.000308
20	Silver	Polar Metabolomics	Ag NP-NM300K	295.876	Up									20	Silver	Ag NP-NM300K	Up	Erythromycin Action Pathway	SMPDB	0		0 (0)	1	1	7	HMDB00696;HMDB00167;HMDB00168;HMDB03406;HMDB00172;HMDB00687#HMDB13773;HMDB00177	10 (20)	2.86e-06	0.000308	2.86e-06	0.000308
21	Silver	Polar Metabolomics	Ag NP-NM300K	299.162	Up	Olomoucine;Cyclandelate, [8]-Shogaol, Panaquinquecol 2, Ginsenoyne C, Ginsenoyne K, Panaquinquecol 7	C15H18N6O;C17H24O3	HMDB35233;HMDB15586;HMDB31463;HMDB38938;HMDB38994;HMDB40375;HMDB41201						21	Silver	Ag NP-NM300K	Up	Amikacin Action Pathway	SMPDB	0		0 (0)	1	1	7	HMDB00696;HMDB00167;HMDB00168;HMDB03406;HMDB00172;HMDB00687#HMDB13773;HMDB00177	10 (20)	2.86e-06	0.000308	2.86e-06	0.000308
22	Silver	Polar Metabolomics	Ag NP-NM300K	121.069	Up									22	Silver	Ag NP-NM300K	Up	Telithromycin Action Pathway	SMPDB	0		0 (0)	1	1	7	HMDB00696;HMDB00167;HMDB00168;HMDB03406;HMDB00172;HMDB00687#HMDB13773;HMDB00177	10 (20)	2.86e-06	0.000308	2.86e-06	0.000308
23	Silver	Polar Metabolomics	Ag NP-NM300K	245.012	Up									23	Silver	Ag NP-NM300K	Up	Lymecycline Action Pathway	SMPDB	0		0 (0)	1	1	7	HMDB00696;HMDB00167;HMDB00168;HMDB03406;HMDB00172;HMDB00687#HMDB13773;HMDB00177	10 (20)	2.86e-06	0.000308	2.86e-06	0.000308
24	Silver	Polar Metabolomics	Ag NP-NM300K	245.949	Up									24	Silver	Ag NP-NM300K	Up	Chloramphenicol Action Pathway	SMPDB	0		0 (0)	1	1	7	HMDB00696;HMDB00167;HMDB00168;HMDB03406;HMDB00172;HMDB00687#HMDB13773;HMDB00177	10 (20)	2.86e-06	0.000308	2.86e-06	0.000308
25	Silver	Polar Metabolomics	Ag NP-NM300K	308.916	Up									25	Silver	Ag NP-NM300K	Up	Troleandomycin Action Pathway	SMPDB	0		0 (0)	1	1	7	HMDB00696;HMDB00167;HMDB00168;HMDB03406;HMDB00172;HMDB00687#HMDB13773;HMDB00177	10 (20)	2.86e-06	0.000308	2.86e-06	0.000308
26	Silver	Polar Metabolomics	Ag NP-NM300K	152.054	Up									26	Silver	Ag NP-NM300K	Up	Azithromycin Action Pathway	SMPDB	0		0 (0)	1	1	7	HMDB00696;HMDB00167;HMDB00168;HMDB03406;HMDB00172;HMDB00687#HMDB13773;HMDB00177	10 (20)	2.86e-06	0.000308	2.86e-06	0.000308
27	Silver	Polar Metabolomics	Ag NP-NM300K	165.988	Up									27	Silver	Ag NP-NM300K	Up	Demeclocycline Action Pathway	SMPDB	0		0 (0)	1	1	7	HMDB00696;HMDB00167;HMDB00168;HMDB03406;HMDB00172;HMDB00687#HMDB13773;HMDB00177	10 (20)	2.86e-06	0.000308	2.86e-06	0.000308
28	Silver	Polar Metabolomics	Ag NP-NM300K	251.894	Up									28	Silver	Ag NP-NM300K	Up	Clindamycin Action Pathway	SMPDB	0		0 (0)	1	1	7	HMDB00696;HMDB00167;HMDB00168;HMDB03406;HMDB00172;HMDB00687#HMDB13773;HMDB00177	10 (20)	2.86e-06	0.000308	2.86e-06	0.000308
29	Silver	Polar Metabolomics	Ag NP-NM300K	239.962	Up									29	Silver	Ag NP-NM300K	Up	Streptomycin Action Pathway	SMPDB	0		0 (0)	1	1	7	HMDB00696;HMDB00167;HMDB00168;HMDB03406;HMDB00172;HMDB00687#HMDB13773;HMDB00177	10 (20)	2.86e-06	0.000308	2.86e-06	0.000308
30	Silver	Polar Metabolomics	Ag NP-NM300K	120.003	Up									30	Silver	Ag NP-NM300K	Up	Clarithromycin Action Pathway	SMPDB	0		0 (0)	1	1	7	HMDB00696;HMDB00167;HMDB00168;HMDB03406;HMDB00172;HMDB00687#HMDB13773;HMDB00177	10 (20)	2.86e-06	0.000308	2.86e-06	0.000308
31	Silver	Polar Metabolomics	Ag NP-NM300K	188.07	Up	Indoleacrylic acid	C11H9NO2	HMDB00734						31	Silver	Ag NP-NM300K	Up	Tobramycin Action Pathway	SMPDB	0		0 (0)	1	1	7	HMDB00696;HMDB00167;HMDB00168;HMDB03406;HMDB00172;HMDB00687#HMDB13773;HMDB00177	10 (20)	2.86e-06	0.000308	2.86e-06	0.000308
32	Silver	Polar Metabolomics	Ag NP-NM300K	178.028	Up									32	Silver	Ag NP-NM300K	Up	Minocycline Action Pathway	SMPDB	0		0 (0)	1	1	7	HMDB00696;HMDB00167;HMDB00168;HMDB03406;HMDB00172;HMDB00687#HMDB13773;HMDB00177	10 (20)	2.86e-06	0.000308	2.86e-06	0.000308
33	Silver	Polar Metabolomics	Ag NP-NM300K	292.942	Up									33	Silver	Ag NP-NM300K	Up	Transport of inorganic cations-anions and amino acids-oligopeptides	Wikipathways	0		0 (0)	1	1	13	HMDB00187;HMDB00696;HMDB00167;HMDB03406;HMDB00168;HMDB00123;HMDB00172;HMDB00159;HMDB00929;HMDB06055;HMDB00158;HMDB00687#HMDB13773;HMDB00177	37 (51)	3.07e-06	0.000322	3.07e-06	0.000322
34	Silver	Polar Metabolomics	Ag NP-NM300K	192.999	Up									34	Silver	Ag NP-NM300K	Up	tRNA charging	HumanCyc	0		38 (41)	1	1	11	HMDB00187;HMDB00696;HMDB00167;HMDB00168;HMDB00123;HMDB00172;HMDB00159;HMDB00929;HMDB00158;HMDB00687#HMDB13773;HMDB00177	20 (24)	7.99e-08	0.000209	1.38e-06	0.000484
35	Silver	Polar Metabolomics	Ag NP-NM300K	366.874	Up									35	Silver	Ag NP-NM300K	Up	Tetracycline Action Pathway	SMPDB	0		0 (0)	1	1	7	HMDB00696;HMDB00167;HMDB00168;HMDB03406;HMDB00172;HMDB00687#HMDB13773;HMDB00177	11 (20)	7.33e-06	0.000731	7.33e-06	0.000731
36	Silver	Polar Metabolomics	Ag NP-NM300K	370.916	Up									36	Silver	Ag NP-NM300K	Up	Doxycycline Action Pathway	SMPDB	0		0 (0)	1	1	7	HMDB00696;HMDB00167;HMDB00168;HMDB03406;HMDB00172;HMDB00687#HMDB13773;HMDB00177	11 (20)	7.33e-06	0.000731	7.33e-06	0.000731
37	Silver	Polar Metabolomics	Ag NP-NM300K	267.928	Up									37	Silver	Ag NP-NM300K	Up	Transport of glucose and other sugars_ bile salts and organic acids_ metal ions and amine compounds	Wikipathways	0		0 (0)	1	1	12	HMDB00187;HMDB00696;HMDB00167;HMDB00168;HMDB00123;HMDB00172;HMDB00159;HMDB00929;HMDB06055;HMDB00158;HMDB00687#HMDB13773;HMDB00177	34 (83)	7.78e-06	0.000757	7.78e-06	0.000757
38	Silver	Polar Metabolomics	Ag NP-NM300K	350.901	Up									38	Silver	Ag NP-NM300K	Up	leukotriene biosynthesis	HumanCyc	0		1 (5)	1	1	11	HMDB00187;HMDB00696;HMDB00167;HMDB00168;HMDB00123;HMDB00172;HMDB00159;HMDB00929;HMDB00158;HMDB00687#HMDB13773;HMDB00177	22 (30)	2.94e-07	0.000234	4.71e-06	0.000824
39	Silver	Polar Metabolomics	Ag NP-NM300K	325.887	Up									39	Silver	Ag NP-NM300K	Up	Aminoacyl-tRNA biosynthesis - Homo sapiens (human)	KEGG	0		46 (66)	1	1	11	HMDB00187;HMDB00696;HMDB00167;HMDB00168;HMDB00123;HMDB00172;HMDB00159;HMDB00929;HMDB00158;HMDB00687#HMDB13773;HMDB00177	22 (52)	2.94e-07	0.000234	4.71e-06	0.000824
40	Silver	Polar Metabolomics	Ag NP-NM300K	241.177	Up	8,8-Dimethoxy-2,6-dimethyl-2-octanol	C12H26O3	HMDB40219						40	Silver	Ag NP-NM300K	Up	Mineral absorption - Homo sapiens (human)	KEGG	0		33 (52)	1	1	9	HMDB00187;HMDB00696;HMDB00167;HMDB00168;HMDB00123;HMDB00172;HMDB00159;HMDB00929;HMDB00687#HMDB13773	15 (29)	5.56e-07	0.000308	8.57e-06	0.0012
41	Silver	Polar Metabolomics	Ag NP-NM300K	318.965	Up									41	Silver	Ag NP-NM300K	Up	Protein digestion and absorption - Homo sapiens (human)	KEGG	0		36 (90)	1	1	12	HMDB00187;HMDB00696;HMDB00167;HMDB00168;HMDB00123;HMDB00172;HMDB00159;HMDB00929;HMDB34301;HMDB00158;HMDB00687#HMDB13773;HMDB00177	31 (47)	2.44e-06	0.000308	3.4e-05	0.00396
42	Silver	Polar Metabolomics	Ag NP-NM300K	265.931	Up									42	Silver	Ag NP-NM300K	Up	Phase II conjugation	Wikipathways	0		0 (0)	1	1	11	HMDB00187;HMDB00696;HMDB00167;HMDB00168;HMDB00123;HMDB00172;HMDB00159;HMDB00929;HMDB00158;HMDB00687#HMDB13773;HMDB00177	37 (164)	0.000131	0.00984	0.000131	0.00984
43	Silver	Polar Metabolomics	Ag NP-NM300K	250.957	Up									43	Silver	Ag NP-NM300K	Up	&gamma;-glutamyl cycle	HumanCyc	0		6 (6)	1	1	11	HMDB00187;HMDB00696;HMDB00167;HMDB00168;HMDB00123;HMDB00172;HMDB00159;HMDB00929;HMDB00158;HMDB00687#HMDB13773;HMDB00177	29 (48)	9.05e-06	0.000859	0.000114	0.0102
44	Silver	Polar Metabolomics	Ag NP-NM300K	104.053	Up									44	Silver	Ag NP-NM300K	Up	Amino acid transport across the plasma membrane	Reactome	0		17 (31)	1	1	10	HMDB00172;HMDB00168;HMDB00123;HMDB03406;HMDB00159;HMDB00929;HMDB06055;HMDB00158;HMDB00687#HMDB13773;HMDB00177	24 (32)	9.31e-06	0.000863	0.000117	0.0102
45	Silver	Polar Metabolomics	Ag NP-NM300K	205.097	Up	L-Tryptophan, D-Tryptophan, 3-Hydroxymethylantipyrine, Ethotoin, Nirvanol, 4-Hydroxyantipyrine, S-nirvanol	C11H12N2O2	HMDB00929;HMDB13609;HMDB13840;HMDB14892;HMDB60533;HMDB60878;HMDB60967						45	Silver	Ag NP-NM300K	Up	Na+/Cl- dependent neurotransmitter transporters	Reactome	0		4 (19)	1	1	9	HMDB00168;HMDB00123;HMDB00172;HMDB00159;HMDB00929;HMDB06055;HMDB00158;HMDB00687#HMDB13773;HMDB00177	20 (31)	1.33e-05	0.0012	0.000162	0.0114
46	Silver	Polar Metabolomics	Ag NP-NM300K	234.983	Up									46	Silver	Ag NP-NM300K	Up	Transport of inorganic cations/anions and amino acids/oligopeptides	Reactome	2	ENSG00000155850;ENSG00000065923	56 (107)	0.0424	1	10	HMDB00172;HMDB00168;HMDB00123;HMDB03406;HMDB00159;HMDB00929;HMDB06055;HMDB00158;HMDB00687#HMDB13773;HMDB00177	34 (55)	0.000315	0.0224	0.000163	0.0114
47	Silver	Polar Metabolomics	Ag NP-NM300K	171.017	Up	Ureidopropionic acid, L-Asparagine, Glycyl-glycine, N-Carbamoylsarcosine, D-Asparagine	C4H8N2O3	HMDB00026;HMDB00168;HMDB11733;HMDB12265;HMDB33780						47	Silver	Ag NP-NM300K	Up	Amine compound SLC transporters	Reactome	0		8 (30)	1	1	9	HMDB00168;HMDB00123;HMDB00172;HMDB00159;HMDB00929;HMDB06055;HMDB00158;HMDB00687#HMDB13773;HMDB00177	21 (35)	2.17e-05	0.00192	0.000255	0.0162
48	Silver	Polar Metabolomics	Ag NP-NM300K	133.032	Up	3-Methyl sulfolene	C5H8O2S	HMDB59667						48	Silver	Ag NP-NM300K	Up	mRNA_ protein_ and metabolite inducation pathway by cyclosporin A	Wikipathways	0		6 (6)	1	1	6	HMDB00167;HMDB00168;HMDB00172;HMDB00929;HMDB00158;HMDB00687#HMDB13773	9 (9)	2.55e-05	0.00221	0.000295	0.0172
49	Silver	Polar Metabolomics	Ag NP-NM300K	236.98	Up									49	Silver	Ag NP-NM300K	Up	Central carbon metabolism in cancer - Homo sapiens (human)	KEGG	0		53 (67)	1	1	10	HMDB00187;HMDB00696;HMDB00168;HMDB00123;HMDB00172;HMDB00159;HMDB00929;HMDB00158;HMDB00687#HMDB13773;HMDB00177	27 (37)	3.27e-05	0.00277	0.00037	0.0199
50	Silver	Polar Metabolomics	Ag NP-NM300K	243.053	Up	L-Tryptophan, D-Tryptophan, 3-Hydroxymethylantipyrine, Ethotoin, Nirvanol, 4-Hydroxyantipyrine, S-nirvanol	C11H12N2O2	HMDB00929;HMDB13609;HMDB13840;HMDB14892;HMDB60533;HMDB60878;HMDB60967						50	Silver	Ag NP-NM300K	Up	Amino Acid metabolism	Wikipathways	0		70 (91)	1	1	12	HMDB00187;HMDB00696;HMDB00167;HMDB00725;HMDB00168;HMDB00123;HMDB00172;HMDB00159;HMDB00929;HMDB00158;HMDB00687#HMDB13773;HMDB00177	39 (108)	3.99e-05	0.00331	0.000444	0.0221
51	Silver	Polar Metabolomics	Ag NP-NM300K	242.18	Up									51	Silver	Ag NP-NM300K	Up	Cytosolic tRNA aminoacylation	Reactome	0		24 (26)	1	1	8	HMDB00168;HMDB00123;HMDB00172;HMDB00159;HMDB00929;HMDB00158;HMDB00687#HMDB13773;HMDB00177	18 (66)	4.92e-05	0.00385	0.000538	0.0221
52	Silver	Polar Metabolomics	Ag NP-NM300K	466.818	Up									52	Silver	Ag NP-NM300K	Up	Mitochondrial tRNA aminoacylation	Reactome	0		21 (23)	1	1	8	HMDB00168;HMDB00123;HMDB00172;HMDB00159;HMDB00929;HMDB00158;HMDB00687#HMDB13773;HMDB00177	18 (66)	4.92e-05	0.00385	0.000538	0.0221
53	Silver	Polar Metabolomics	Ag NP-NM300K	180.003	Up									53	Silver	Ag NP-NM300K	Up	tRNA Aminoacylation	Reactome	0		42 (45)	1	1	8	HMDB00168;HMDB00123;HMDB00172;HMDB00159;HMDB00929;HMDB00158;HMDB00687#HMDB13773;HMDB00177	18 (66)	4.92e-05	0.00385	0.000538	0.0221
54	Silver	Polar Metabolomics	Ag NP-NM300K	156.046	Up									54	Silver	Ag NP-NM300K	Up	Tryptophan catabolism	Reactome	0		8 (13)	1	1	6	HMDB00172;HMDB00159;HMDB00929;HMDB00158;HMDB00687#HMDB13773;HMDB00177	11 (34)	0.000122	0.00936	0.00122	0.0474
55	Silver	Polar Metabolomics	Ag NP-NM300K	150.014	Up	4-Aminophenol, 2-Acetylpyrrole, 1-Methyl-2-pyrrolecarboxaldehyde	C6H7NO	HMDB01169;HMDB35882;HMDB40582						55	Silver	Ag NP-NM300K	Up	Amino acid and oligopeptide SLC transporters	Reactome	0		22 (51)	1	1	10	HMDB00172;HMDB00168;HMDB00123;HMDB03406;HMDB00159;HMDB00929;HMDB06055;HMDB00158;HMDB00687#HMDB13773;HMDB00177	33 (49)	0.000238	0.0176	0.00223	0.0819
56	Silver	Polar Metabolomics	Ag NP-NM300K	117.074	Up									56	Silver	Ag NP-NM300K	Up	Glycine_ serine and threonine metabolism - Homo sapiens (human)	KEGG	0		27 (40)	1	1	8	HMDB00187;HMDB04041;HMDB00719;HMDB00167;HMDB00123;HMDB03406;HMDB00929;HMDB01149	22 (50)	0.000273	0.0198	0.00251	0.0878
57	Silver	Polar Metabolomics	Ag NP-NM300K	121.084	Up									57	Silver	Ag NP-NM300K	Up	ABC transporters - Homo sapiens (human)	KEGG	0		27 (45)	1	1	11	HMDB00187;HMDB00247;HMDB00167;HMDB00765;HMDB00123;HMDB00172;HMDB00159;HMDB01149;HMDB00030;HMDB00687#HMDB13773;HMDB00177	41 (128)	0.000369	0.0258	0.00328	0.109
58	Silver	Polar Metabolomics	Ag NP-NM300K	150.058	Up	L-Methionine, Penicillamine, Racemethionine	C5H11NO2S	HMDB00696;HMDB14997;HMDB33951						58	Silver	Ag NP-NM300K	Up	Biochemical Pathways Part I	Wikipathways	0		0 (0)	1	1	21	HMDB00187;HMDB00247;HMDB00696;HMDB06055;HMDB00167;HMDB00168;HMDB02104;HMDB00123;HMDB00172;HMDB00159;HMDB00929;HMDB00719;HMDB06272;HMDB00158;HMDB01149;HMDB00026;HMDB00291;HMDB00206;HMDB00734;HMDB00687#HMDB13773;HMDB00177	135 (467)	0.00215	0.14	0.00215	0.14
59	Silver	Polar Metabolomics	Ag NP-NM300K	166.086	Up	L-Phenylalanine, 3-Pyridinebutanoic acid, Benzocaine, Norsalsolinol, Gentiatibetine, Ethyl 2-aminobenzoate, Methyl N-methylanthranilate, Benzyl glycinate	C9H11NO2	HMDB00159;HMDB01007;HMDB04992;HMDB06044;HMDB33485;HMDB33589;HMDB34169;HMDB59934						59	Silver	Ag NP-NM300K	Up	Biogenic Amine Synthesis	Wikipathways	0		2 (15)	1	1	4	HMDB00177;HMDB00158;HMDB00159;HMDB00929	6 (17)	0.000743	0.0505	0.0061	0.186
60	Silver	Polar Metabolomics	Ag NP-NM300K	177.025	Up	N-Methylnicotinamide, 2-Acetyl-3-methylpyrazine, 2-Aminobenzamide, 4-Acetyl-2-methylpyrimidine, 2-Methylnicotinamide	C7H8N2O	HMDB03152;HMDB30001;HMDB33947;HMDB37819;HMDB59711						60	Silver	Ag NP-NM300K	Up	Transport of glucose and other sugars_ bile salts and organic acids_ metal ions and amine compounds	Reactome	0		54 (106)	1	1	9	HMDB00168;HMDB00123;HMDB00172;HMDB00159;HMDB00929;HMDB06055;HMDB00158;HMDB00687#HMDB13773;HMDB00177	31 (85)	0.000748	0.0505	0.00613	0.186
61	Silver	Polar Metabolomics	Ag NP-NM300K	167.09	Up									61	Silver	Ag NP-NM300K	Up	SLC-mediated transmembrane transport	Reactome	2	ENSG00000155850;ENSG00000065923	170 (286)	0.263	1	11	HMDB00172;HMDB00168;HMDB00123;HMDB03406;HMDB00159;HMDB00929;HMDB06055;HMDB00158;HMDB00030;HMDB00687#HMDB13773;HMDB00177	52 (173)	0.00332	0.207	0.00703	0.205
62	Silver	Polar Metabolomics	Ag NP-NM300K	296.983	Up									62	Silver	Ag NP-NM300K	Up	Transmembrane transport of small molecules	Reactome	4	ENSG00000155850;ENSG00000172380;ENSG00000198363;ENSG00000065923	373 (628)	0.174	1	11	HMDB00172;HMDB00168;HMDB00123;HMDB03406;HMDB00159;HMDB00929;HMDB06055;HMDB00158;HMDB00030;HMDB00687#HMDB13773;HMDB00177	57 (212)	0.00719	0.421	0.00961	0.269
63	Silver	Polar Metabolomics	Ag NP-NM300K	269.972	Up									63	Silver	Ag NP-NM300K	Up	Metabolism of amino acids and derivatives	Reactome	4	ENSG00000129824;ENSG00000089009;ENSG00000145293;ENSG00000137767	248 (328)	0.0566	1	11	HMDB02104;HMDB00168;HMDB00123;HMDB00172;HMDB00159;HMDB00929;HMDB00158;HMDB00766;HMDB00734;HMDB00687#HMDB13773;HMDB00177	67 (272)	0.025	1	0.0107	0.288
64	Silver	Polar Metabolomics	Ag NP-NM300K	297.921	Up									64	Silver	Ag NP-NM300K	Up	Gene Expression	Reactome	5	ENSG00000129824;ENSG00000089009;ENSG00000137574;ENSG00000114942;ENSG00000163235	1495 (1755)	0.954	1	8	HMDB00168;HMDB00123;HMDB00172;HMDB00159;HMDB00929;HMDB00158;HMDB00687#HMDB13773;HMDB00177	28 (149)	0.00175	0.116	0.0123	0.319
65	Silver	Polar Metabolomics	Ag NP-NM300K	151.062	Up	7-Methylhypoxanthine, 1-Methylhypoxanthine	C6H6N4O	HMDB03162;HMDB13141						65	Silver	Ag NP-NM300K	Up	Glucose Homeostasis	Wikipathways	0		0 (1)	1	1	5	HMDB00696;HMDB00158;HMDB00172;HMDB00159;HMDB00177	15 (21)	0.00702	0.417	0.00702	0.417
66	Silver	Polar Metabolomics	Ag NP-NM300K	155.043	Up	Ureidopropionic acid, L-Asparagine, Glycyl-glycine, N-Carbamoylsarcosine, D-Asparagine	C4H8N2O3	HMDB00026;HMDB00168;HMDB11733;HMDB12265;HMDB33780						66	Silver	Ag NP-NM300K	Up	Sudden Infant Death Syndrome (SIDS) Susceptibility Pathways	Wikipathways	0		91 (159)	1	1	3	HMDB00158;HMDB00159;HMDB00929	4 (14)	0.00253	0.163	0.0177	0.423
67	Silver	Polar Metabolomics	Ag NP-NM300K	323.89	Up									67	Silver	Ag NP-NM300K	Up	Histidine_ lysine_ phenylalanine_ tyrosine_ proline and tryptophan catabolism	Reactome	0		29 (45)	1	1	8	HMDB02104;HMDB00172;HMDB00159;HMDB00929;HMDB00158;HMDB00734;HMDB00687#HMDB13773;HMDB00177	30 (90)	0.00286	0.181	0.0196	0.423
68	Silver	Polar Metabolomics	Ag NP-NM300K	283.988	Up									68	Silver	Ag NP-NM300K	Up	Asparagine N-linked glycosylation	Reactome	6	ENSG00000111726;ENSG00000100764;ENSG00000115525;ENSG00000206560;ENSG00000198380;ENSG00000163235	248 (283)	0.00308	1	0		10 (119)	1	1	0.0209	0.423
69	Silver	Polar Metabolomics	Ag NP-NM300K	327.931	Up									69	Silver	Ag NP-NM300K	Up	Synthesis of substrates in N-glycan biosythesis	Reactome	3	ENSG00000198380;ENSG00000111726;ENSG00000115525	51 (63)	0.00324	1	0		8 (68)	1	1	0.0218	0.423
70	Silver	Polar Metabolomics	Ag NP-NM300K	223.985	Up									70	Silver	Ag NP-NM300K	Up	Sialuria or French Type Sialuria	SMPDB	2	ENSG00000198380;ENSG00000111726	15 (17)	0.00337	1	0		10 (32)	1	1	0.0225	0.423
71	Silver	Polar Metabolomics	Ag NP-NM300K	156.077	Up	L-Histidine, L-2-Amino-3-(1-pyrazolyl)propanoic acid	C6H9N3O2	HMDB00177;HMDB34267						71	Silver	Ag NP-NM300K	Up	Sialuria or French Type Sialuria	SMPDB	2	ENSG00000198380;ENSG00000111726	15 (17)	0.00337	1	0		10 (32)	1	1	0.0225	0.423
72	Silver	Polar Metabolomics	Ag NP-NM300K	285.946	Up									72	Silver	Ag NP-NM300K	Up	Amino Sugar Metabolism	SMPDB	2	ENSG00000198380;ENSG00000111726	15 (17)	0.00337	1	0		10 (32)	1	1	0.0225	0.423
73	Silver	Polar Metabolomics	Ag NP-NM300K	164.03	Up	p-Anisidine, 2-Propionylpyrrole, 4-Hydroxybenzylamine, 1-Ethyl-1H-pyrrole-2-carboxaldehyde, 2-Acetyl-1-methylpyrrole	C7H9NO	HMDB29300;HMDB32492;HMDB32578;HMDB36058;HMDB40360						73	Silver	Ag NP-NM300K	Up	G(M2)-Gangliosidosis: Variant B_ Tay-sachs disease	SMPDB	2	ENSG00000198380;ENSG00000111726	15 (17)	0.00337	1	0		10 (32)	1	1	0.0225	0.423
74	Silver	Polar Metabolomics	Ag NP-NM300K	281.905	Up									74	Silver	Ag NP-NM300K	Up	Tay-Sachs Disease	SMPDB	2	ENSG00000198380;ENSG00000111726	15 (17)	0.00337	1	0		10 (32)	1	1	0.0225	0.423
75	Silver	Polar Metabolomics	Ag NP-NM300K	289.975	Up									75	Silver	Ag NP-NM300K	Up	Salla Disease/Infantile Sialic Acid Storage Disease	SMPDB	2	ENSG00000198380;ENSG00000111726	15 (17)	0.00337	1	0		10 (32)	1	1	0.0225	0.423
76	Silver	Polar Metabolomics	Ag NP-NM300K	133.099	Up	1,3-Octadiene, 2-(Methylenebutyl)-cyclopropane, 2,4-Octadiene, Dimethylhexa-1,4-diene, 2,5-Dimethyl-2,4-hexadiene	C8H14	HMDB40966;HMDB61899;HMDB61900;HMDB61901;HMDB61902						76	Silver	Ag NP-NM300K	Up	Ammonia Recycling	SMPDB	0		9 (12)	1	1	5	HMDB00187;HMDB00168;HMDB00123;HMDB00030;HMDB00177	13 (29)	0.00345	0.212	0.023	0.423
77	Silver	Polar Metabolomics	Ag NP-NM300K	134.109	Up									77	Silver	Ag NP-NM300K	Up	Metabolism of porphyrins	Wikipathways	0		0 (0)	1	1	2	HMDB00123;HMDB01149	2 (37)	0.00786	0.43	0.00786	0.43
78	Silver	Polar Metabolomics	Ag NP-NM300K	87.0997	Up									78	Silver	Ag NP-NM300K	Up	Aminosugars metabolism	INOH	2	ENSG00000198380;ENSG00000111726	16 (20)	0.00383	1	0		6 (32)	1	1	0.0252	0.451
79	Silver	Polar Metabolomics	Ag NP-NM300K	279.946	Up									79	Silver	Ag NP-NM300K	Down	Ascorbate and aldarate metabolism - Homo sapiens (human)	KEGG	8	ENSG00000244474;ENSG00000243135;ENSG00000241119;ENSG00000242515;ENSG00000242366;ENSG00000244122;ENSG00000167165;ENSG00000240224	15 (27)	7.11e-13	6.14e-10	4	HMDB12326;HMDB33704;HMDB00208;HMDB00211	9 (47)	0.00101	0.27	2.59e-14	2.71e-11
80	Silver	Polar Metabolomics	Ag NP-NM300K	110.071	Up									80	Silver	Ag NP-NM300K	Down	Retinol metabolism - Homo sapiens (human)	KEGG	10	ENSG00000244474;ENSG00000243135;ENSG00000135437;ENSG00000241119;ENSG00000242515;ENSG00000242366;ENSG00000244122;ENSG00000167165;ENSG00000240224;ENSG00000167600	25 (65)	3.11e-14	1.34e-10	0		6 (24)	1	1	9.98e-13	5.23e-10
81	Silver	Polar Metabolomics	Ag NP-NM300K	133.105	Up									81	Silver	Ag NP-NM300K	Down	Glucuronidation	Wikipathways	8	ENSG00000244474;ENSG00000243135;ENSG00000241119;ENSG00000242515;ENSG00000242366;ENSG00000244122;ENSG00000167165;ENSG00000240224	15 (26)	7.11e-13	6.14e-10	1	HMDB00122	2 (14)	0.115	1	2.54e-12	8.87e-10
82	Silver	Polar Metabolomics	Ag NP-NM300K	301.975	Up									82	Silver	Ag NP-NM300K	Down	Xenobiotics metabolism	EHMN	9	ENSG00000244474;ENSG00000143198;ENSG00000241119;ENSG00000240224;ENSG00000242515;ENSG00000244122;ENSG00000167165;ENSG00000243135;ENSG00000167600	22 (53)	5.04e-13	6.14e-10	0		3 (93)	1	1	1.48e-11	3.53e-09
83	Silver	Polar Metabolomics	Ag NP-NM300K	305.024	Up									83	Silver	Ag NP-NM300K	Down	Metabolism of xenobiotics by cytochrome P450 - Homo sapiens (human)	KEGG	10	ENSG00000244474;ENSG00000143198;ENSG00000241119;ENSG00000243135;ENSG00000242515;ENSG00000242366;ENSG00000244122;ENSG00000167165;ENSG00000240224;ENSG00000167600	32 (74)	5.77e-13	6.14e-10	0		4 (121)	1	1	1.69e-11	3.53e-09
84	Silver	Polar Metabolomics	Ag NP-NM300K	242.019	Up									84	Silver	Ag NP-NM300K	Down	Steroid hormone biosynthesis - Homo sapiens (human)	KEGG	9	ENSG00000244474;ENSG00000243135;ENSG00000088002;ENSG00000241119;ENSG00000242515;ENSG00000242366;ENSG00000244122;ENSG00000167165;ENSG00000240224	25 (58)	2.02e-12	1.45e-09	0		23 (99)	1	1	5.64e-11	9.84e-09
85	Silver	Polar Metabolomics	Ag NP-NM300K	244.053	Up									85	Silver	Ag NP-NM300K	Down	Tyrosine metabolism	EHMN	11	ENSG00000244474;ENSG00000243135;ENSG00000241119;ENSG00000164638;ENSG00000242515;ENSG00000244122;ENSG00000167165;ENSG00000240224;ENSG00000146477;ENSG00000167600;ENSG00000136881	53 (108)	5.42e-12	2.93e-09	2	HMDB00208;HMDB01490	35 (105)	0.63	1	9.36e-11	1.4e-08
86	Silver	Polar Metabolomics	Ag NP-NM300K	132.102	Up	L-Isoleucine, L-Alloisoleucine, L-Leucine, L-Norleucine, Aminocaproic acid, Beta-Leucine, D-Leucine, 3-Aminocaproic acid, 6-Deoxyfagomine, N-(2-Hydroxyethyl)-morpholine, N-methylvaline	C6H13NO2	HMDB00172;HMDB00557;HMDB00687;HMDB01645;HMDB01901;HMDB03640;HMDB13773;HMDB29168;HMDB36382;HMDB60650;HMDB61716	LMFA01100047;LMFA01100042;LMFA01100035;					86	Silver	Ag NP-NM300K	Down	Drug metabolism - cytochrome P450 - Homo sapiens (human)	KEGG	9	ENSG00000244474;ENSG00000243135;ENSG00000241119;ENSG00000240224;ENSG00000242515;ENSG00000242366;ENSG00000244122;ENSG00000167165;ENSG00000143198	27 (70)	4.55e-12	2.81e-09	0		8 (88)	1	1	1.23e-10	1.62e-08
87	Silver	Polar Metabolomics	Ag NP-NM300K	158.022	Up	L-Threonine, L-Homoserine, L-Allothreonine, Hydroxyethyl glycine, 4-Amino-3-hydroxybutyrate;2-Benzoxazolol	C4H9NO3;C7H5NO2	HMDB00167;HMDB00719;HMDB04041;HMDB61148;HMDB61877;HMDB32931						87	Silver	Ag NP-NM300K	Down	Glucuronidation	Reactome	7	ENSG00000244474;ENSG00000243135;ENSG00000241119;ENSG00000242366;ENSG00000244122;ENSG00000167165;ENSG00000240224	12 (24)	9.1e-12	4.37e-09	0		2 (29)	1	1	2.4e-10	2.8e-08
88	Silver	Polar Metabolomics	Ag NP-NM300K	128.032	Up	L-Serine, D-Serine	C3H7NO3	HMDB00187;HMDB03406						88	Silver	Ag NP-NM300K	Down	Linoleate metabolism	EHMN	9	ENSG00000244474;ENSG00000243135;ENSG00000134824;ENSG00000241119;ENSG00000242515;ENSG00000244122;ENSG00000167165;ENSG00000240224;ENSG00000167600	30 (75)	1.35e-11	5.85e-09	0		8 (24)	1	1	3.52e-10	3.44e-08
89	Silver	Polar Metabolomics	Ag NP-NM300K	281.943	Up									89	Silver	Ag NP-NM300K	Down	Pentose and glucuronate interconversions - Homo sapiens (human)	KEGG	8	ENSG00000244474;ENSG00000243135;ENSG00000241119;ENSG00000242515;ENSG00000242366;ENSG00000244122;ENSG00000167165;ENSG00000240224	21 (34)	2.13e-11	7.68e-09	1	HMDB00208	17 (55)	0.651	1	3.61e-10	3.44e-08
90	Silver	Polar Metabolomics	Ag NP-NM300K	200.041	Up									90	Silver	Ag NP-NM300K	Down	Vitamin A (retinol) metabolism	EHMN	7	ENSG00000244474;ENSG00000243135;ENSG00000241119;ENSG00000242515;ENSG00000244122;ENSG00000167165;ENSG00000240224	13 (26)	1.96e-11	7.68e-09	0		6 (28)	1	1	5.02e-10	4.38e-08
91	Silver	Polar Metabolomics	Ag NP-NM300K	283.902	Up									91	Silver	Ag NP-NM300K	Down	Metapathway biotransformation	Wikipathways	12	ENSG00000244474;ENSG00000243135;ENSG00000088002;ENSG00000241119;ENSG00000240224;ENSG00000242515;ENSG00000244122;ENSG00000167165;ENSG00000143198;ENSG00000167600;ENSG00000136881;ENSG00000176153	91 (177)	1.52e-10	5.06e-08	0		0 (0)	1	1	1.52e-10	5.06e-08
92	Silver	Polar Metabolomics	Ag NP-NM300K	204.042	Up	L-Phenylalanine, 3-Pyridinebutanoic acid, Benzocaine, Norsalsolinol, Gentiatibetine, Ethyl 2-aminobenzoate, Methyl N-methylanthranilate, Benzyl glycinate	C9H11NO2	HMDB00159;HMDB01007;HMDB04992;HMDB06044;HMDB33485;HMDB33589;HMDB34169;HMDB59934						92	Silver	Ag NP-NM300K	Down	Drug metabolism - other enzymes - Homo sapiens (human)	KEGG	8	ENSG00000244474;ENSG00000243135;ENSG00000241119;ENSG00000242515;ENSG00000242366;ENSG00000244122;ENSG00000167165;ENSG00000240224	30 (46)	5.68e-10	1.29e-07	0		0 (39)	1	1	5.68e-10	1.29e-07
93	Silver	Polar Metabolomics	Ag NP-NM300K	178.059	Up	L-Histidine, L-2-Amino-3-(1-pyrazolyl)propanoic acid	C6H9N3O2	HMDB00177;HMDB34267						93	Silver	Ag NP-NM300K	Down	Chemical carcinogenesis - Homo sapiens (human)	KEGG	9	ENSG00000244474;ENSG00000243135;ENSG00000241119;ENSG00000240224;ENSG00000242515;ENSG00000242366;ENSG00000244122;ENSG00000167165;ENSG00000143198	39 (82)	1.85e-10	5.72e-08	0		3 (99)	1	1	4.34e-09	3.5e-07
94	Silver	Polar Metabolomics	Ag NP-NM300K	279.001	Up									94	Silver	Ag NP-NM300K	Down	Irinotecan Pathway_ Pharmacodynamics	PharmGKB	6	ENSG00000244474;ENSG00000243135;ENSG00000241119;ENSG00000242515;ENSG00000242366;ENSG00000167165	13 (14)	1.96e-09	3.84e-07	0		0 (1)	1	1	1.96e-09	3.84e-07
95	Silver	Polar Metabolomics	Ag NP-NM300K	205.068	Up	Galactitol, Sorbitol, Mannitol, L-Iditol	C6H14O6	HMDB00107;HMDB00247;HMDB00765;HMDB11632						95	Silver	Ag NP-NM300K	Down	Biological oxidations	Reactome	13	ENSG00000244474;ENSG00000143198;ENSG00000088002;ENSG00000127948;ENSG00000241119;ENSG00000240224;ENSG00000242366;ENSG00000244122;ENSG00000167165;ENSG00000243135;ENSG00000100031;ENSG00000167600;ENSG00000243989	122 (229)	3.79e-10	1.09e-07	2	HMDB01895;HMDB01049	45 (318)	0.767	1	6.68e-09	5e-07
96	Silver	Polar Metabolomics	Ag NP-NM300K	273.055	Up	Glycerol 1-propanoate diacetate;2-[(5-Methylsulfinyl)-4-penten-2-ynylidene]-1,6-dioxaspiro[4.4]non-3-ene	C10H16O6;C13H14O3S	HMDB31640;HMDB32670						96	Silver	Ag NP-NM300K	Down	Androgen and estrogen biosynthesis and metabolism	EHMN	9	ENSG00000244474;ENSG00000143198;ENSG00000241119;ENSG00000240224;ENSG00000242515;ENSG00000244122;ENSG00000167165;ENSG00000243135;ENSG00000167600	43 (89)	4.77e-10	1.29e-07	0		19 (62)	1	1	1.07e-08	7.48e-07
97	Silver	Polar Metabolomics	Ag NP-NM300K	183.085	Up									97	Silver	Ag NP-NM300K	Down	Valproic Acid Pathway_ Pharmacokinetics	PharmGKB	6	ENSG00000244474;ENSG00000243135;ENSG00000241119;ENSG00000242515;ENSG00000242366;ENSG00000167165	11 (21)	5.36e-10	1.29e-07	0		1 (1)	1	1	1.2e-08	7.58e-07
98	Silver	Polar Metabolomics	Ag NP-NM300K	134.106	Up									98	Silver	Ag NP-NM300K	Down	Porphyrin and chlorophyll metabolism - Homo sapiens (human)	KEGG	8	ENSG00000244474;ENSG00000243135;ENSG00000241119;ENSG00000242515;ENSG00000242366;ENSG00000244122;ENSG00000167165;ENSG00000240224	30 (42)	5.68e-10	1.29e-07	0		5 (124)	1	1	1.27e-08	7.58e-07
99	Silver	Polar Metabolomics	Ag NP-NM300K	86.0964	Up	Piperidine	C5H11N	HMDB34301						99	Silver	Ag NP-NM300K	Down	Phase II conjugation	Reactome	10	ENSG00000244474;ENSG00000143198;ENSG00000088002;ENSG00000241119;ENSG00000240224;ENSG00000242366;ENSG00000244122;ENSG00000167165;ENSG00000243135;ENSG00000100031	67 (112)	1.64e-09	3.38e-07	2	HMDB01895;HMDB01049	21 (147)	0.356	1	1.3e-08	7.58e-07
100	Silver	Polar Metabolomics	Ag NP-NM300K	119.09	Up									100	Silver	Ag NP-NM300K	Down	Porphyrin metabolism	EHMN	7	ENSG00000244474;ENSG00000243135;ENSG00000241119;ENSG00000242515;ENSG00000244122;ENSG00000167165;ENSG00000240224	21 (34)	1.24e-09	2.67e-07	0		3 (48)	1	1	2.66e-08	1.47e-06
101	Silver	Polar Metabolomics	Ag NP-NM300K	142.048	Up	L-Threonine, L-Homoserine, L-Allothreonine, Hydroxyethyl glycine, 4-Amino-3-hydroxybutyrate	C4H9NO3	HMDB00167;HMDB00719;HMDB04041;HMDB61148;HMDB61877						101	Silver	Ag NP-NM300K	Down	Tamoxifen Pathway_ Pharmacokinetics	PharmGKB	4	ENSG00000242366;ENSG00000244474;ENSG00000243135;ENSG00000242515	6 (18)	1.76e-07	3.3e-05	0		0 (1)	1	1	1.76e-07	3.3e-05
102	Silver	Polar Metabolomics	Ag NP-NM300K	226.045	Up	4-Hydroxydiphenylamine, 2-(1-Naphthyl)acetamide	C12H11NO	HMDB32597;HMDB32710						102	Silver	Ag NP-NM300K	Down	NRF2 pathway	Wikipathways	9	ENSG00000244474;ENSG00000243135;ENSG00000241119;ENSG00000087086;ENSG00000244122;ENSG00000167165;ENSG00000143198;ENSG00000100031;ENSG00000176153	97 (142)	7.58e-07	0.000136	0		0 (1)	1	1	7.58e-07	0.000136
103	Silver	Polar Metabolomics	Ag NP-NM300K	182.081	Up	L-Tyrosine, 4-Hydroxy-4-(3-pyridyl)-butanoic acid, L-Threo-3-Phenylserine, Beta-Tyrosine, o-Tyrosine, Meta-Tyrosine, 4,6,7-Trihydroxy-1,2,3,4-tetrahydroisoquinoline	C9H11NO3	HMDB00158;HMDB01119;HMDB02184;HMDB03831;HMDB06050;HMDB59720;HMDB60280						103	Silver	Ag NP-NM300K	Down	Estrogen Metabolism Pathway	PharmGKB	4	ENSG00000241119;ENSG00000244474;ENSG00000243135;ENSG00000242366	9 (15)	1.44e-06	0.000249	0		0 (0)	1	1	1.44e-06	0.000249
104	Silver	Polar Metabolomics	Ag NP-NM300K	307.02	Up									104	Silver	Ag NP-NM300K	Down	Mycophenolic acid Pathway_ Pharmacokinetics/Pharmacodynamics	PharmGKB	4	ENSG00000241119;ENSG00000242366;ENSG00000244122;ENSG00000242515	10 (13)	2.38e-06	0.000396	0		0 (2)	1	1	2.38e-06	0.000396
105	Silver	Polar Metabolomics	Ag NP-NM300K	227.079	Up	N6-Acetyl-L-lysine, N-Alpha-acetyllysine, Glycyl-L-leucine, Alanyl-Valine, Glycyl-Isoleucine, Isoleucyl-Glycine, Leucyl-Glycine, Valyl-Alanine;L-Tryptophan, D-Tryptophan, 3-Hydroxymethylantipyrine, Ethotoin, Nirvanol, 4-Hydroxyantipyrine, S-nirvanol	C8H16N2O3;C11H12N2O2	HMDB00206;HMDB00446;HMDB00759;HMDB28700;HMDB28844;HMDB28907;HMDB28929;HMDB29120;HMDB00929;HMDB13609;HMDB13840;HMDB14892;HMDB60533;HMDB60878;HMDB60967						105	Silver	Ag NP-NM300K	Down	Pregnane X Receptor pathway	Wikipathways	5	ENSG00000241119;ENSG00000244474;ENSG00000167165;ENSG00000109819;ENSG00000243135	22 (33)	2.76e-06	0.000441	0		0 (1)	1	1	2.76e-06	0.000441
106	Silver	Polar Metabolomics	Ag NP-NM300K	221.042	Up	Galactitol, Sorbitol, Mannitol, L-Iditol;Vanillylmandelic acid, Syringic acid, 3-(3,4-Dihydroxyphenyl)lactic acid, 3-Hydroxy-4-methoxymandelate, Ethyl gallate, 3,4-O-Dimethylgallic acid	C6H14O6;C9H10O5	HMDB00107;HMDB00247;HMDB00765;HMDB11632;HMDB00291;HMDB02085;HMDB03503;HMDB29170;HMDB33836;HMDB41662						106	Silver	Ag NP-NM300K	Down	Constitutive Androstane Receptor Pathway	Wikipathways	5	ENSG00000241119;ENSG00000244474;ENSG00000167165;ENSG00000109819;ENSG00000243135	23 (32)	3.5e-06	0.000539	0		0 (1)	1	1	3.5e-06	0.000539
107	Silver	Polar Metabolomics	Ag NP-NM300K	320.985	Up									107	Silver	Ag NP-NM300K	Down	Mycophenolic acid Pathway_ Pharmacokinetics	PharmGKB	4	ENSG00000241119;ENSG00000242366;ENSG00000244122;ENSG00000242515	12 (17)	5.52e-06	0.000823	0		0 (2)	1	1	5.52e-06	0.000823
108	Silver	Polar Metabolomics	Ag NP-NM300K	160.035	Up									108	Silver	Ag NP-NM300K	Down	nicotine degradation III	HumanCyc	3	ENSG00000244474;ENSG00000167165;ENSG00000167600	5 (10)	1.14e-05	0.00164	0		0 (24)	1	1	1.14e-05	0.00164
109	Silver	Polar Metabolomics	Ag NP-NM300K	192.003	Up	2-Amino-3-phosphonopropionic acid	C3H8NO5P	HMDB00370						109	Silver	Ag NP-NM300K	Down	Nuclear Receptors Meta-Pathway	Wikipathways	11	ENSG00000244474;ENSG00000243135;ENSG00000241119;ENSG00000109819;ENSG00000087086;ENSG00000244122;ENSG00000167165;ENSG00000143198;ENSG00000100031;ENSG00000136881;ENSG00000176153	223 (316)	2.18e-05	0.00297	0		0 (0)	1	1	2.18e-05	0.00297
110	Silver	Polar Metabolomics	Ag NP-NM300K	226.024	Up									110	Silver	Ag NP-NM300K	Down	Tamoxifen metabolism	Wikipathways	3	ENSG00000242366;ENSG00000244474;ENSG00000242515	6 (21)	2.27e-05	0.00297	0		0 (14)	1	1	2.27e-05	0.00297
111	Silver	Polar Metabolomics	Ag NP-NM300K	194.022	Up									111	Silver	Ag NP-NM300K	Down	Galactose Metabolism	SMPDB	0		10 (13)	1	1	6	HMDB00660;HMDB00169;HMDB03345;HMDB00122;HMDB00143;HMDB00211	10 (36)	4.48e-06	0.00892	5.96e-05	0.00297
112	Silver	Polar Metabolomics	Ag NP-NM300K	220.037	Up	L-Tyrosine, 4-Hydroxy-4-(3-pyridyl)-butanoic acid, L-Threo-3-Phenylserine, Beta-Tyrosine, o-Tyrosine, Meta-Tyrosine, 4,6,7-Trihydroxy-1,2,3,4-tetrahydroisoquinoline	C9H11NO3	HMDB00158;HMDB01119;HMDB02184;HMDB03831;HMDB06050;HMDB59720;HMDB60280						112	Silver	Ag NP-NM300K	Down	Galactosemia	SMPDB	0		10 (13)	1	1	6	HMDB00660;HMDB00169;HMDB03345;HMDB00122;HMDB00143;HMDB00211	10 (36)	4.48e-06	0.00892	5.96e-05	0.00297
113	Silver	Polar Metabolomics	Ag NP-NM300K	263.027	Up									113	Silver	Ag NP-NM300K	Down	Aryl Hydrocarbon Receptor Pathway	Wikipathways	5	ENSG00000241119;ENSG00000244474;ENSG00000167165;ENSG00000243135;ENSG00000244122	35 (46)	3.05e-05	0.00388	0		0 (1)	1	1	3.05e-05	0.00388
114	Silver	Polar Metabolomics	Ag NP-NM300K	269.965	Up									114	Silver	Ag NP-NM300K	Down	Galactose metabolism - Homo sapiens (human)	KEGG	0		23 (31)	1	1	6	HMDB00169;HMDB03418;HMDB03345;HMDB00122;HMDB00143;HMDB00211	11 (45)	9.45e-06	0.0126	0.000119	0.00566
115	Silver	Polar Metabolomics	Ag NP-NM300K	327.964	Up									115	Silver	Ag NP-NM300K	Down	Heme degradation	Reactome	3	ENSG00000241119;ENSG00000244474;ENSG00000167165	8 (8)	6.25e-05	0.0075	0		0 (14)	1	1	6.25e-05	0.0075
116	Silver	Polar Metabolomics	Ag NP-NM300K	284.003	Up									116	Silver	Ag NP-NM300K	Down	Phenytoin Pathway_ Pharmacokinetics	PharmGKB	3	ENSG00000241119;ENSG00000244474;ENSG00000167165	9 (20)	9.3e-05	0.0109	0		0 (1)	1	1	9.3e-05	0.0109
117	Silver	Polar Metabolomics	Ag NP-NM300K	98.0212	Up	Glycine, Acetohydroxamic Acid, Ethyl nitrite	C2H5NO2	HMDB00123;HMDB14691;HMDB31239						117	Silver	Ag NP-NM300K	Down	nicotine degradation IV	HumanCyc	3	ENSG00000244474;ENSG00000167165;ENSG00000167600	6 (17)	2.27e-05	0.00297	0		1 (28)	1	1	0.000265	0.0121
118	Silver	Polar Metabolomics	Ag NP-NM300K	207.972	Up									118	Silver	Ag NP-NM300K	Down	Ibuprofen Pathway_ Pharmacokinetics	PharmGKB	3	ENSG00000241119;ENSG00000243135;ENSG00000242515	7 (16)	3.94e-05	0.00486	0		1 (3)	1	1	0.000439	0.0192
119	Silver	Polar Metabolomics	Ag NP-NM300K	353.947	Up									119	Silver	Ag NP-NM300K	Down	Benzodiazepine Pathway_ Pharmacokinetics	PharmGKB	2	ENSG00000241119;ENSG00000244474	3 (11)	0.000333	0.0312	0		0 (11)	1	1	0.000333	0.0312
120	Silver	Polar Metabolomics	Ag NP-NM300K	268.009	Up									120	Silver	Ag NP-NM300K	Down	Nicotine Pathway_ Pharmacokinetics	PharmGKB	2	ENSG00000241119;ENSG00000244474	3 (10)	0.000333	0.0312	0		0 (1)	1	1	0.000333	0.0312
121	Silver	Polar Metabolomics	Ag NP-NM300K	177.069	Up									121	Silver	Ag NP-NM300K	Down	oxidative stress induced gene expression via nrf2	BioCarta	3	ENSG00000167165;ENSG00000137731;ENSG00000127948	16 (19)	0.000588	0.0529	0		0 (0)	1	1	0.000588	0.0529
122	Silver	Polar Metabolomics	Ag NP-NM300K	309.954	Up									122	Silver	Ag NP-NM300K	Down	Tamoxifen Action Pathway	SMPDB	2	ENSG00000244474;ENSG00000242515	4 (10)	0.000661	0.0571	0		0 (20)	1	1	0.000661	0.0571
123	Silver	Polar Metabolomics	Ag NP-NM300K	319.999	Up									123	Silver	Ag NP-NM300K	Down	Tamoxifen Metabolism Pathway	SMPDB	2	ENSG00000244474;ENSG00000242515	4 (10)	0.000661	0.0571	0		0 (20)	1	1	0.000661	0.0571
124	Silver	Polar Metabolomics	Ag NP-NM300K	289.029	Up	2-[(5-Methylsulfinyl)-4-penten-2-ynylidene]-1,6-dioxaspiro[4.4]non-3-ene	C13H14O3S	HMDB32670						124	Silver	Ag NP-NM300K	Down	Mycophenolic Acid Metabolism Pathway	SMPDB	3	ENSG00000242366;ENSG00000241119;ENSG00000244122	11 (16)	0.00018	0.0199	0		1 (16)	1	1	0.00173	0.0682
125	Silver	Polar Metabolomics	Ag NP-NM300K	221.988	Up									125	Silver	Ag NP-NM300K	Down	Estrogen metabolism	Wikipathways	3	ENSG00000241119;ENSG00000167165;ENSG00000243135	11 (18)	0.00018	0.0199	0		6 (18)	1	1	0.00173	0.0682
126	Silver	Polar Metabolomics	Ag NP-NM300K	210.05	Up									126	Silver	Ag NP-NM300K	Down	Amino sugar and nucleotide sugar metabolism - Homo sapiens (human)	KEGG	0		43 (48)	1	1	5	HMDB00660;HMDB00169;HMDB00122;HMDB00143;HMDB03345	11 (108)	0.000183	0.0999	0.00176	0.0682
127	Silver	Polar Metabolomics	Ag NP-NM300K	204.063	Up	L-Tyrosine, 4-Hydroxy-4-(3-pyridyl)-butanoic acid, L-Threo-3-Phenylserine, Beta-Tyrosine, o-Tyrosine, Meta-Tyrosine, 4,6,7-Trihydroxy-1,2,3,4-tetrahydroisoquinoline	C9H11NO3	HMDB00158;HMDB01119;HMDB02184;HMDB03831;HMDB06050;HMDB59720;HMDB60280						127	Silver	Ag NP-NM300K	Down	Ibuprofen Action Pathway	SMPDB	4	ENSG00000241119;ENSG00000243135;ENSG00000100031;ENSG00000242515	28 (50)	0.000201	0.0217	0		12 (79)	1	1	0.00191	0.0715
128	Silver	Polar Metabolomics	Ag NP-NM300K	236.021	Up									128	Silver	Ag NP-NM300K	Down	Nicotine Action Pathway	SMPDB	3	ENSG00000241119;ENSG00000244474;ENSG00000137731	12 (36)	0.000238	0.0251	0		2 (33)	1	1	0.00222	0.075
129	Silver	Polar Metabolomics	Ag NP-NM300K	318.007	Up									129	Silver	Ag NP-NM300K	Down	Metabolism	Reactome	27	ENSG00000107159;ENSG00000244474;ENSG00000243135;ENSG00000237289;ENSG00000113924;ENSG00000009950;ENSG00000103043;ENSG00000143198;ENSG00000088002;ENSG00000127948;ENSG00000242366;ENSG00000244122;ENSG00000167165;ENSG00000240224;ENSG00000146477;ENSG00000038427;ENSG00000136881;ENSG00000243989;ENSG00000176153;ENSG00000176340;ENSG00000241119;ENSG00000162433;ENSG00000167600;ENSG00000128311;ENSG00000132437…	1505 (2035)	0.00291	0.199	13	HMDB03345;HMDB00156;HMDB01049;HMDB00510;HMDB00169;HMDB00143;HMDB00086;HMDB00500;HMDB00211;HMDB01895;HMDB00208;HMDB01090;HMDB00225	159 (1265)	0.103	1	0.00274	0.075
130	Silver	Polar Metabolomics	Ag NP-NM300K	176.029	Up	N-Acetylarylamine, 2-Phenylacetamide, 2-Aminoacetophenone, 2-Aminoacetophenone, 2-Acetyl-4-methylpyridine, 2-Acetyl-6-methylpyridine, 2,3-Dihydro-1H-pyrrolizine-5-carboxaldehyde, 5-(2-Furanyl)-3,4-dihydro-2H-pyrrole, 2-Acetyl-5-methylpyridine, 4-Acetyl-2-methylpyridine, 4-Acetyl-3-methylpyridine	C8H9NO	HMDB01250;HMDB10715;HMDB32628;HMDB32630;HMDB37071;HMDB37072;HMDB40008;HMDB40013;HMDB40222;HMDB40223;HMDB40224						130	Silver	Ag NP-NM300K	Down	Gluconeogenesis	SMPDB	0		16 (22)	1	1	5	HMDB03345;HMDB00122;HMDB00516;HMDB00208;HMDB00744	12 (34)	0.000301	0.0999	0.00274	0.075
131	Silver	Polar Metabolomics	Ag NP-NM300K	291.983	Up									131	Silver	Ag NP-NM300K	Down	Glycogenosis_ Type IA. Von gierke disease	SMPDB	0		16 (22)	1	1	5	HMDB03345;HMDB00122;HMDB00516;HMDB00208;HMDB00744	12 (34)	0.000301	0.0999	0.00274	0.075
132	Silver	Polar Metabolomics	Ag NP-NM300K	367.912	Up									132	Silver	Ag NP-NM300K	Down	Triosephosphate isomerase	SMPDB	0		16 (22)	1	1	5	HMDB03345;HMDB00122;HMDB00516;HMDB00208;HMDB00744	12 (34)	0.000301	0.0999	0.00274	0.075
133	Silver	Polar Metabolomics	Ag NP-NM300K	220.009	Up									133	Silver	Ag NP-NM300K	Down	Fructose-1_6-diphosphatase deficiency	SMPDB	0		16 (22)	1	1	5	HMDB03345;HMDB00122;HMDB00516;HMDB00208;HMDB00744	12 (34)	0.000301	0.0999	0.00274	0.075
134	Silver	Polar Metabolomics	Ag NP-NM300K	162.05	Up	N,N-Dimethylaniline, 1-Phenylethylamine, Phenylethylamine, 5-Ethyl-2-methylpyridine, 2-Propylpyridine, 2-Ethyl-5-methylpyridine, 2-Phenylethanaminium, 2,6-Dimethylaniline	C8H11N	HMDB01020;HMDB02017;HMDB12275;HMDB29729;HMDB32497;HMDB40041;HMDB60276;HMDB60677						134	Silver	Ag NP-NM300K	Down	Glycogenosis_ Type IB	SMPDB	0		16 (22)	1	1	5	HMDB03345;HMDB00122;HMDB00516;HMDB00208;HMDB00744	12 (34)	0.000301	0.0999	0.00274	0.075
135	Silver	Polar Metabolomics	Ag NP-NM300K	293.98	Up									135	Silver	Ag NP-NM300K	Down	Glycogen Storage Disease Type 1A (GSD1A) or Von Gierke Disease	SMPDB	0		16 (22)	1	1	5	HMDB03345;HMDB00122;HMDB00516;HMDB00208;HMDB00744	12 (34)	0.000301	0.0999	0.00274	0.075
136	Silver	Polar Metabolomics	Ag NP-NM300K	223.04	Up	Galactitol, Sorbitol, Mannitol, L-Iditol	C6H14O6	HMDB00107;HMDB00247;HMDB00765;HMDB11632						136	Silver	Ag NP-NM300K	Down	Glycogenosis_ Type IC	SMPDB	0		16 (22)	1	1	5	HMDB03345;HMDB00122;HMDB00516;HMDB00208;HMDB00744	12 (34)	0.000301	0.0999	0.00274	0.075
137	Silver	Polar Metabolomics	Ag NP-NM300K	277.967	Up									137	Silver	Ag NP-NM300K	Down	Phosphoenolpyruvate carboxykinase deficiency 1 (PEPCK1)	SMPDB	0		16 (22)	1	1	5	HMDB03345;HMDB00122;HMDB00516;HMDB00208;HMDB00744	12 (34)	0.000301	0.0999	0.00274	0.075
138	Silver	Polar Metabolomics	Ag NP-NM300K	73.0842	Up									138	Silver	Ag NP-NM300K	Down	Aflatoxin activation and detoxification	Reactome	3	ENSG00000143198;ENSG00000100031;ENSG00000243989	13 (23)	0.000307	0.0312	0		4 (25)	1	1	0.00279	0.075
139	Silver	Polar Metabolomics	Ag NP-NM300K	299.977	Up									139	Silver	Ag NP-NM300K	Down	Nicotine Metabolism Pathway	SMPDB	2	ENSG00000241119;ENSG00000244474	3 (9)	0.000333	0.0312	0		1 (24)	1	1	0.003	0.0766
140	Silver	Polar Metabolomics	Ag NP-NM300K	176.066	Up	(R)-Amphetamine, Amphetamine, Dextroamphetamine, 3-Butylpyridine, 3-(2-Methylpropyl)pyridine, 2-(2-Methylpropyl)pyridine	C9H13N	HMDB12128;HMDB14328;HMDB15516;HMDB32934;HMDB37287;HMDB37291						140	Silver	Ag NP-NM300K	Down	Nicotine Metabolism	Wikipathways	2	ENSG00000241119;ENSG00000244474	3 (6)	0.000333	0.0312	0		1 (8)	1	1	0.003	0.0766
141	Silver	Polar Metabolomics	Ag NP-NM300K	274.006	Up									141	Silver	Ag NP-NM300K	Down	Ibuprofen Metabolism Pathway	SMPDB	3	ENSG00000241119;ENSG00000243135;ENSG00000242515	14 (23)	0.000388	0.0357	0		2 (13)	1	1	0.00344	0.0857
142	Silver	Polar Metabolomics	Ag NP-NM300K	270.001	Up									142	Silver	Ag NP-NM300K	Down	Metformin Pathway_ Pharmacokinetics	PharmGKB	2	ENSG00000164638;ENSG00000146477	5 (7)	0.00109	0.0891	0		0 (2)	1	1	0.00109	0.0891
143	Silver	Polar Metabolomics	Ag NP-NM300K	170.021	Up	4-Hydroxyproline, N-Acetyl-L-alanine, Propionylglycine, 5-Aminolevulinic acid, L-Glutamic gamma-semialdehyde, 3-Hydroxy-L-proline, 4-Hydroxy-L-proline, 5-Amino-2-oxopentanoic acid, 4-Hydroxy-2-pyrrolidinecarboxylic acid, Trans-3-hydroxy-L-proline, cis-4-Hydroxy-D-proline, N-Acetyl-beta-alanine;2-Amino-3-phosphonopropionic acid;Indole-5,6-quinone, Agrocybin, 1H-Indole-2,3-dione	C5H9NO3;C3H8NO5P;C8H5NO2	HMDB00725;HMDB00766;HMDB00783;HMDB01149;HMDB02104;HMDB02113;HMDB06055;HMDB06272;HMDB36576;HMDB59659;HMDB60460;HMDB61880;HMDB00370;HMDB06779;HMDB30481;HMDB61933	LMFA01100055;LMFA01060169;					143	Silver	Ag NP-NM300K	Down	Proximal tubule bicarbonate reclamation - Homo sapiens (human)	KEGG	1	ENSG00000137731	13 (23)	0.13	1	3	HMDB03345;HMDB00156;HMDB00208	6 (17)	0.0033	0.464	0.00375	0.0914
144	Silver	Polar Metabolomics	Ag NP-NM300K	188.068	Up	Triethanolamine;L-Phenylalanine, 3-Pyridinebutanoic acid, Benzocaine, Norsalsolinol, Gentiatibetine, Ethyl 2-aminobenzoate, Methyl N-methylanthranilate, Benzyl glycinate	C6H15NO3;C9H11NO2	HMDB32538;HMDB00159;HMDB01007;HMDB04992;HMDB06044;HMDB33485;HMDB33589;HMDB34169;HMDB59934						144	Silver	Ag NP-NM300K	Down	Organic cation/anion/zwitterion transport	Reactome	2	ENSG00000110628;ENSG00000146477	7 (16)	0.00227	0.158	1	HMDB00208	4 (36)	0.217	1	0.00423	0.0972
145	Silver	Polar Metabolomics	Ag NP-NM300K	271.998	Up									145	Silver	Ag NP-NM300K	Down	Trehalose Degradation	SMPDB	1	ENSG00000137731	5 (12)	0.052	1	2	HMDB03345;HMDB00516	3 (10)	0.00975	0.794	0.00436	0.0972
146	Silver	Polar Metabolomics	Ag NP-NM300K	249.962	Up									146	Silver	Ag NP-NM300K	Down	Lactose Degradation	SMPDB	1	ENSG00000137731	5 (11)	0.052	1	2	HMDB00122;HMDB00143	3 (9)	0.00975	0.794	0.00436	0.0972
147	Silver	Polar Metabolomics	Ag NP-NM300K	267.077	Up	Biotin	C10H16N2O3S	HMDB00030						147	Silver	Ag NP-NM300K	Down	Lactose Intolerance	SMPDB	1	ENSG00000137731	5 (11)	0.052	1	2	HMDB00122;HMDB00143	3 (9)	0.00975	0.794	0.00436	0.0972
148	Silver	Polar Metabolomics	Ag NP-NM300K	248.951	Down									148	Silver	Ag NP-NM300K	Down	superpathway of tryptophan utilization	HumanCyc	3	ENSG00000167600;ENSG00000132437;ENSG00000127948	21 (44)	0.00134	0.104	1	HMDB00225	10 (70)	0.459	1	0.00518	0.113
149	Silver	Polar Metabolomics	Ag NP-NM300K	285.069	Down	L-beta-aspartyl-L-glutamic acid , Na-L-Glutamyl-L-aspartic acid, Ng-L-Glutamyl-L-aspartic acid	C9H14N2O7	HMDB11164;HMDB30413;HMDB30419						149	Silver	Ag NP-NM300K	Down	melatonin degradation I	HumanCyc	2	ENSG00000167600;ENSG00000127948	6 (13)	0.00163	0.119	0		0 (13)	1	1	0.00163	0.119
150	Silver	Polar Metabolomics	Ag NP-NM300K	260.03	Down									150	Silver	Ag NP-NM300K	Down	Taurine and hypotaurine metabolism - Homo sapiens (human)	KEGG	2	ENSG00000136881;ENSG00000100031	6 (11)	0.00163	0.119	1	HMDB00208	9 (22)	0.425	1	0.00573	0.122
151	Silver	Polar Metabolomics	Ag NP-NM300K	322.964	Down									151	Silver	Ag NP-NM300K	Down	sucrose degradation	HumanCyc	0		6 (8)	1	1	3	HMDB00660;HMDB03345;HMDB00516	4 (12)	0.000716	0.219	0.0059	0.124
152	Silver	Polar Metabolomics	Ag NP-NM300K	223.012	Down	Ethionamide sulphoxide	C8H10N2OS	HMDB60624						152	Silver	Ag NP-NM300K	Down	Metabolism of porphyrins	Reactome	3	ENSG00000241119;ENSG00000244474;ENSG00000167165	18 (19)	0.000843	0.0714	0		2 (37)	1	1	0.00681	0.14
153	Silver	Polar Metabolomics	Ag NP-NM300K	328.083	Down									153	Silver	Ag NP-NM300K	Down	Farnesoid X Receptor Pathway	Wikipathways	2	ENSG00000136881;ENSG00000109819	7 (19)	0.00227	0.158	0		0 (1)	1	1	0.00227	0.158
154	Silver	Polar Metabolomics	Ag NP-NM300K	204.056	Down									154	Silver	Ag NP-NM300K	Down	Galactose metabolism	EHMN	0		33 (44)	1	1	4	HMDB00169;HMDB00122;HMDB00516;HMDB03345	9 (48)	0.00101	0.27	0.00801	0.161
155	Silver	Polar Metabolomics	Ag NP-NM300K	225.035	Down	Vanylglycol, 1-(3-Hydroxy-4-methoxyphenyl)-1,2-ethanediol, Genipic acid, 4-Formyl-3-(formylmethyl)-4-hexenoic acid, 3,4-Methylenepimelic acid	C9H12O4	HMDB01490;HMDB35056;HMDB36072;HMDB39650;HMDB59730						155	Silver	Ag NP-NM300K	Down	Arylamine metabolism	Wikipathways	2	ENSG00000241119;ENSG00000244474	5 (7)	0.00109	0.0891	0		1 (3)	1	1	0.00855	0.169
156	Silver	Polar Metabolomics	Ag NP-NM300K	327.08	Down	N-Acetylaspartylglutamic acid	C11H16N2O8	HMDB01067						156	Silver	Ag NP-NM300K	Down	Morphine Action Pathway	SMPDB	3	ENSG00000242366;ENSG00000243135;ENSG00000137731	20 (44)	0.00116	0.0928	0		1 (16)	1	1	0.009	0.175
157	Silver	Polar Metabolomics	Ag NP-NM300K	469.02	Down									157	Silver	Ag NP-NM300K	Down	Scavenging by Class A Receptors	Reactome	2	ENSG00000087086;ENSG00000134871	11 (21)	0.00577	0.332	1	HMDB00169	4 (29)	0.217	1	0.00961	0.182
158	Silver	Polar Metabolomics	Ag NP-NM300K	262.014	Down									158	Silver	Ag NP-NM300K	Down	Phenytoin (Antiarrhythmic) Action Pathway	SMPDB	4	ENSG00000241119;ENSG00000244474;ENSG00000167165;ENSG00000137731	45 (82)	0.00127	0.0999	0		2 (21)	1	1	0.00976	0.182
159	Silver	Polar Metabolomics	Ag NP-NM300K	203.053	Down	D-Glucose, D-Galactose, D-Mannose, Myoinositol, 3-Deoxyarabinohexonic acid, Beta-D-Glucose, D-Fructose, Allose, L-Sorbose, Alpha-D-Glucose, D-Tagatose, Beta-D-Galactose, Scyllitol, L-Gulose, Dihydroxyacetone (dimer), L-Galactose, Levoinositol, Alpha-D-Glucopyranoside, D-Glucopyranoside	C6H12O6	HMDB00122;HMDB00143;HMDB00169;HMDB00211;HMDB00346;HMDB00516;HMDB00660;HMDB01151;HMDB01266;HMDB03345;HMDB03418;HMDB03449;HMDB06088;HMDB12326;HMDB32222;HMDB33704;HMDB34220;HMDB61922;HMDB62170						159	Silver	Ag NP-NM300K	Down	Tyrosinemia_ transient_ of the newborn	SMPDB	2	ENSG00000113924;ENSG00000132437	9 (18)	0.00383	0.233	2	HMDB00208;HMDB01490	22 (67)	0.378	1	0.0109	0.182
160	Silver	Polar Metabolomics	Ag NP-NM300K	241.029	Down									160	Silver	Ag NP-NM300K	Down	Dopamine beta-hydroxylase deficiency	SMPDB	2	ENSG00000113924;ENSG00000132437	9 (18)	0.00383	0.233	2	HMDB00208;HMDB01490	22 (67)	0.378	1	0.0109	0.182
161	Silver	Polar Metabolomics	Ag NP-NM300K	272.043	Down									161	Silver	Ag NP-NM300K	Down	Tyrosine Metabolism	SMPDB	2	ENSG00000113924;ENSG00000132437	9 (18)	0.00383	0.233	2	HMDB00208;HMDB01490	22 (67)	0.378	1	0.0109	0.182
162	Silver	Polar Metabolomics	Ag NP-NM300K	323.011	Down	N-Methoxyspirobrassinol	C12H14N2O2S2	HMDB41133						162	Silver	Ag NP-NM300K	Down	Alkaptonuria	SMPDB	2	ENSG00000113924;ENSG00000132437	9 (18)	0.00383	0.233	2	HMDB00208;HMDB01490	22 (67)	0.378	1	0.0109	0.182
163	Silver	Polar Metabolomics	Ag NP-NM300K	473.005	Down									163	Silver	Ag NP-NM300K	Down	Monoamine oxidase-a deficiency (MAO-A)	SMPDB	2	ENSG00000113924;ENSG00000132437	9 (18)	0.00383	0.233	2	HMDB00208;HMDB01490	22 (67)	0.378	1	0.0109	0.182
164	Silver	Polar Metabolomics	Ag NP-NM300K	263.008	Down									164	Silver	Ag NP-NM300K	Down	Hawkinsinuria	SMPDB	2	ENSG00000113924;ENSG00000132437	9 (18)	0.00383	0.233	2	HMDB00208;HMDB01490	22 (67)	0.378	1	0.0109	0.182
165	Silver	Polar Metabolomics	Ag NP-NM300K	286.021	Down									165	Silver	Ag NP-NM300K	Down	Tyrosinemia Type I	SMPDB	2	ENSG00000113924;ENSG00000132437	9 (18)	0.00383	0.233	2	HMDB00208;HMDB01490	22 (67)	0.378	1	0.0109	0.182
166	Silver	Polar Metabolomics	Ag NP-NM300K	320.967	Down									166	Silver	Ag NP-NM300K	Down	superpathway of melatonin degradation	HumanCyc	2	ENSG00000167600;ENSG00000127948	6 (14)	0.00163	0.119	0		2 (24)	1	1	0.0121	0.198
167	Silver	Polar Metabolomics	Ag NP-NM300K	271.04	Down									167	Silver	Ag NP-NM300K	Down	Bile secretion - Homo sapiens (human)	KEGG	2	ENSG00000136881;ENSG00000137731	33 (71)	0.0477	1	3	HMDB00122;HMDB01895;HMDB00208	13 (162)	0.0355	1	0.0125	0.201
168	Silver	Polar Metabolomics	Ag NP-NM300K	183.026	Down	Oxoadipic acid, 3-Oxoadipic acid, 2-Methyl-4-oxopentanedioic acid, 3-Methyl-3-hydroxypentanedioate	C6H8O5	HMDB00225;HMDB00398;HMDB39447;HMDB59737	LMFA01170121;LMFA01170096;					168	Silver	Ag NP-NM300K	Down	lysine degradation I (saccharopine pathway)	HumanCyc	0		3 (4)	1	1	3	HMDB00208;HMDB00225;HMDB00510	5 (16)	0.00172	0.428	0.0127	0.201
169	Silver	Polar Metabolomics	Ag NP-NM300K	328.999	Down									169	Silver	Ag NP-NM300K	Down	Vitamin D Receptor Pathway	Wikipathways	5	ENSG00000107159;ENSG00000167600;ENSG00000125968;ENSG00000146674;ENSG00000135100	93 (184)	0.00302	0.204	0		0 (1)	1	1	0.00302	0.204
170	Silver	Polar Metabolomics	Ag NP-NM300K	318.97	Down									170	Silver	Ag NP-NM300K	Down	Uricosurics Pathway_ Pharmacodynamics	PharmGKB	1	ENSG00000124564	3 (11)	0.0316	0.836	1	HMDB01895	1 (6)	0.0591	1	0.0136	0.212
171	Silver	Polar Metabolomics	Ag NP-NM300K	298.952	Down									171	Silver	Ag NP-NM300K	Down	Organic cation transport	Reactome	2	ENSG00000110628;ENSG00000146477	7 (11)	0.00227	0.158	0		2 (29)	1	1	0.0161	0.248
172	Silver	Polar Metabolomics	Ag NP-NM300K	260.161	Down	Glutaminyl-Isoleucine, Glutaminyl-Leucine, Hydroxyprolyl-Lysine, Isoleucyl-Glutamine, Isoleucyl-Gamma-glutamate, Leucyl-Glutamine, Leucyl-Gamma-glutamate, Lysyl-Hydroxyproline, Gamma-glutamyl-Isoleucine, Gamma-glutamyl-Leucine	C11H21N3O4	HMDB28800;HMDB28801;HMDB28868;HMDB28905;HMDB28921;HMDB28927;HMDB28943;HMDB28952;HMDB29152;HMDB29153						172	Silver	Ag NP-NM300K	Down	Metabolism of lipids and lipoproteins	Reactome	5	ENSG00000103043;ENSG00000136881;ENSG00000176153;ENSG00000100031;ENSG00000134824	519 (728)	0.654	1	9	HMDB03345;HMDB00156;HMDB01895;HMDB00086;HMDB00500;HMDB01090;HMDB00143;HMDB00208;HMDB00211	58 (525)	0.00364	0.483	0.0167	0.253
173	Silver	Polar Metabolomics	Ag NP-NM300K	330.996	Down	(S)-5-Diphosphomevalonic acid, (R)-Mevalonic acid-5-pyrophosphate	C6H14O10P2	HMDB01090;HMDB01981	LMFA01050416;					173	Silver	Ag NP-NM300K	Down	Regulation of Hypoxia-inducible Factor (HIF) by oxygen	Wikipathways	1	ENSG00000107159	2 (3)	0.0211	0.617	1	HMDB00208	2 (4)	0.115	1	0.017	0.253
174	Silver	Polar Metabolomics	Ag NP-NM300K	280.129	Down	Asparaginyl-Phenylalanine, Phenylalanyl-Asparagine;Benzphetamine	C13H17N3O4;C17H21N	HMDB28738;HMDB28990;HMDB15003						174	Silver	Ag NP-NM300K	Down	superpathway of conversion of glucose to acetyl CoA and entry into the TCA cycle	HumanCyc	0		40 (48)	1	1	4	HMDB03345;HMDB00156;HMDB00516;HMDB00208	11 (36)	0.00244	0.464	0.0171	0.253
175	Silver	Polar Metabolomics	Ag NP-NM300K	378.926	Down									175	Silver	Ag NP-NM300K	Down	Irinotecan Pathway_ Pharmacokinetics	PharmGKB	2	ENSG00000241119;ENSG00000242515	10 (13)	0.00476	0.281	0		0 (1)	1	1	0.00476	0.281
176	Silver	Polar Metabolomics	Ag NP-NM300K	376.929	Down									176	Silver	Ag NP-NM300K	Down	Sulfide oxidation to sulfate	Reactome	1	ENSG00000128311	5 (5)	0.052	1	1	HMDB00156	1 (15)	0.0591	1	0.0209	0.285
177	Silver	Polar Metabolomics	Ag NP-NM300K	492.845	Down									177	Silver	Ag NP-NM300K	Down	Calnexin/calreticulin cycle	Reactome	0		24 (25)	1	1	2	HMDB03345;HMDB00169	2 (15)	0.00338	0.464	0.0226	0.285
178	Silver	Polar Metabolomics	Ag NP-NM300K	493.982	Down									178	Silver	Ag NP-NM300K	Down	N-glycan trimming in the ER and Calnexin/Calreticulin cycle	Reactome	0		33 (34)	1	1	2	HMDB03345;HMDB00169	2 (22)	0.00338	0.464	0.0226	0.285
179	Silver	Polar Metabolomics	Ag NP-NM300K	169.011	Down	Oxoglutaric acid, 3-Oxoglutaric acid	C5H6O5	HMDB00208;HMDB13701						179	Silver	Ag NP-NM300K	Down	GDP-glucose biosynthesis II	HumanCyc	0		4 (6)	1	1	2	HMDB03345;HMDB00516	2 (11)	0.00338	0.464	0.0226	0.285
180	Silver	Polar Metabolomics	Ag NP-NM300K	132.987	Down									180	Silver	Ag NP-NM300K	Down	trehalose degradation	HumanCyc	0		2 (4)	1	1	2	HMDB03345;HMDB00516	2 (8)	0.00338	0.464	0.0226	0.285
181	Silver	Polar Metabolomics	Ag NP-NM300K	308.004	Down									181	Silver	Ag NP-NM300K	Down	Na+-dependent glucose transporters	Reactome	0		3 (6)	1	1	2	HMDB00169;HMDB03345	2 (4)	0.00338	0.464	0.0226	0.285
182	Silver	Polar Metabolomics	Ag NP-NM300K	184.058	Down	Aminoadipic acid, Acetylhomoserine, Glutamate, gamma-methyl ester	C6H11NO4	HMDB00510;HMDB29423;HMDB61715	LMFA01170098;					182	Silver	Ag NP-NM300K	Down	Galactosemia III	SMPDB	0		7 (8)	1	1	2	HMDB03345;HMDB00143	2 (20)	0.00338	0.464	0.0226	0.285
183	Silver	Polar Metabolomics	Ag NP-NM300K	258.933	Down									183	Silver	Ag NP-NM300K	Down	Galactosemia II (GALK)	SMPDB	0		7 (8)	1	1	2	HMDB03345;HMDB00143	2 (20)	0.00338	0.464	0.0226	0.285
184	Silver	Polar Metabolomics	Ag NP-NM300K	273.051	Down	Gamma-Glutamylcysteine	C8H14N2O5S	HMDB01049						184	Silver	Ag NP-NM300K	Down	Nucleotide Sugars Metabolism	SMPDB	0		7 (8)	1	1	2	HMDB03345;HMDB00143	2 (20)	0.00338	0.464	0.0226	0.285
185	Silver	Polar Metabolomics	Ag NP-NM300K	178.993	Down	2-Methoxybenzenethiol, Kahweofuran, 2-Acetyl-5-methylthiophene, 2-Propanoylthiophene, 2-(Methylthio)phenol, 2-Acetyl-3-methylthiophene;4-Hydroxybenzoic acid, Salicylic acid, 3-Hydroxybenzoic acid, Gentisate aldehyde, 2-Methoxy-1,4-benzoquinone, alpha-Furyl methyl diketone, Sesamol, 3,4-Dihydroxybenzaldehyde	C7H8OS;C7H6O3	HMDB32571;HMDB32922;HMDB33130;HMDB33159;HMDB41281;HMDB41502;HMDB00500;HMDB01895;HMDB02466;HMDB04062;HMDB32576;HMDB32920;HMDB33812;HMDB59965						185	Silver	Ag NP-NM300K	Down	lactose degradation III	HumanCyc	0		2 (2)	1	1	2	HMDB00516;HMDB03449	2 (4)	0.00338	0.464	0.0226	0.285
186	Silver	Polar Metabolomics	Ag NP-NM300K	157.011	Down	L-Malic acid, Malic acid, D-Malic acid, Velcorin	C4H6O5	HMDB00156;HMDB00744;HMDB31518;HMDB32872						186	Silver	Ag NP-NM300K	Down	N-glycan trimming and elongation in the cis-Golgi	Reactome	0		4 (5)	1	1	2	HMDB00169;HMDB03345	2 (13)	0.00338	0.464	0.0226	0.285
187	Silver	Polar Metabolomics	Ag NP-NM300K	281.095	Down	N-Despyridinyl rosiglitazone	C13H16N2O3S	HMDB60842						187	Silver	Ag NP-NM300K	Down	D-galactose degradation V (Leloir pathway)	HumanCyc	0		6 (6)	1	1	2	HMDB00143;HMDB03449	2 (11)	0.00338	0.464	0.0226	0.285
188	Silver	Polar Metabolomics	Ag NP-NM300K	280.092	Down	2,4-Undecadiene-8,10-diynoic acid 2,3-dehydropiperidide;Glycerophosphocholine	C16H17NO;C8H20NO6P	HMDB33525;HMDB00086						188	Silver	Ag NP-NM300K	Down	Glutathione metabolism - Homo sapiens (human)	KEGG	3	ENSG00000143198;ENSG00000176153;ENSG00000100031	38 (54)	0.00748	0.37	1	HMDB01049	10 (38)	0.459	1	0.0229	0.285
189	Silver	Polar Metabolomics	Ag NP-NM300K	190.993	Down	S-Methyl benzenecarbothioate;Phenylglyoxylic acid, (E)-8-Hydroxy-2-octene-4,6-diynoic acid, 4-Hydroxyphthalide, 3,4-Methylenedioxybenzaldehyde, 1,4-Benzodioxin-2(3H)-one	C8H8OS;C8H6O3	HMDB29694;HMDB01587;HMDB31515;HMDB32598;HMDB32612;HMDB40528						189	Silver	Ag NP-NM300K	Down	N-Glycan biosynthesis	EHMN	1	ENSG00000172269	41 (42)	0.355	1	2	HMDB00169;HMDB00122	3 (51)	0.00975	0.794	0.0231	0.285
190	Silver	Polar Metabolomics	Ag NP-NM300K	271.036	Down									190	Silver	Ag NP-NM300K	Down	Glutathione metabolism	Wikipathways	2	ENSG00000176153;ENSG00000100031	15 (20)	0.0107	0.37	1	HMDB01049	7 (19)	0.349	1	0.0246	0.3
191	Silver	RNAseq	Ag NP-NM300K	ENSG00000198692	Up	eukaryotic translation initiation factor 1A, Y-linked	EIF1AY							191	Silver	Ag NP-NM300K	Down	Disulfiram Action Pathway	SMPDB	2	ENSG00000113924;ENSG00000132437	14 (25)	0.00935	0.37	2	HMDB00208;HMDB01490	24 (77)	0.422	1	0.0258	0.311
192	Silver	RNAseq	Ag NP-NM300K	ENSG00000185222	Up	transcription elongation factor A like 9	TCEAL9							192	Silver	Ag NP-NM300K	Down	Binding and Uptake of Ligands by Scavenger Receptors	Reactome	2	ENSG00000087086;ENSG00000134871	20 (42)	0.0187	0.6	1	HMDB00169	4 (41)	0.217	1	0.0264	0.315
193	Silver	RNAseq	Ag NP-NM300K	ENSG00000204379	Up	X antigen family member 1A	XAGE1A							193	Silver	Ag NP-NM300K	Down	Morphine Metabolism Pathway	SMPDB	2	ENSG00000242366;ENSG00000243135	11 (16)	0.00577	0.332	0		0 (6)	1	1	0.00577	0.332
194	Silver	RNAseq	Ag NP-NM300K	ENSG00000163735	Up	C-X-C motif chemokine ligand 5	CXCL5							194	Silver	Ag NP-NM300K	Down	Tyrosine metabolism	INOH	2	ENSG00000113924;ENSG00000132437	18 (34)	0.0153	0.508	2	HMDB00156;HMDB00208	18 (44)	0.288	1	0.0283	0.333
195	Silver	RNAseq	Ag NP-NM300K	ENSG00000255526	Up	NEDD8-MDP1 readthrough	NEDD8-MDP1							195	Silver	Ag NP-NM300K	Down	bile acid biosynthesis_ neutral pathway	HumanCyc	2	ENSG00000136881;ENSG00000127948	10 (15)	0.00476	0.281	0		2 (44)	1	1	0.0302	0.352
196	Silver	RNAseq	Ag NP-NM300K	ENSG00000127922	Up	split hand/foot malformation (ectrodactyly) type 1	SHFM1							196	Silver	Ag NP-NM300K	Down	Arginine biosynthesis - Homo sapiens (human)	KEGG	2	ENSG00000114786;ENSG00000243989	15 (21)	0.0107	0.37	1	HMDB00208	10 (23)	0.459	1	0.0311	0.354
197	Silver	RNAseq	Ag NP-NM300K	ENSG00000204382	Up	X antigen family member 1B	XAGE1B							197	Silver	Ag NP-NM300K	Down	Extracellular matrix organization	Reactome	5	ENSG00000086548;ENSG00000213949;ENSG00000134871;ENSG00000038427;ENSG00000039068	163 (295)	0.0294	0.831	1	HMDB00208	3 (28)	0.167	1	0.0311	0.354
198	Silver	RNAseq	Ag NP-NM300K	ENSG00000184792	Up	oxysterol binding protein 2	OSBP2							198	Silver	Ag NP-NM300K	Down	Irinotecan Pathway	Wikipathways	2	ENSG00000241119;ENSG00000242515	12 (14)	0.00688	0.37	0		0 (0)	1	1	0.00688	0.37
199	Silver	RNAseq	Ag NP-NM300K	ENSG00000166923	Up	gremlin 1, DAN family BMP antagonist	GREM1							199	Silver	Ag NP-NM300K	Down	betaKlotho-mediated ligand binding	Reactome	1	ENSG00000160867	1 (3)	0.0106	0.37	0		0 (3)	1	1	0.0106	0.37
200	Silver	RNAseq	Ag NP-NM300K	ENSG00000163235	Up	transforming growth factor alpha	TGFA							200	Silver	Ag NP-NM300K	Down	thiosulfate disproportionation III (rhodanese)	HumanCyc	1	ENSG00000128311	1 (1)	0.0106	0.37	0		0 (5)	1	1	0.0106	0.37
201	Silver	RNAseq	Ag NP-NM300K	ENSG00000125772	Up	glycerophosphocholine phosphodiesterase 1	GPCPD1							201	Silver	Ag NP-NM300K	Down	FGFR4 mutant receptor activation	Reactome	1	ENSG00000160867	1 (1)	0.0106	0.37	0		0 (3)	1	1	0.0106	0.37
202	Silver	RNAseq	Ag NP-NM300K	ENSG00000171530	Up	tubulin folding cofactor A	TBCA							202	Silver	Ag NP-NM300K	Down	miRNA targets in ECM and membrane receptors	Wikipathways	2	ENSG00000213949;ENSG00000134871	15 (42)	0.0107	0.37	0		0 (0)	1	1	0.0107	0.37
203	Silver	RNAseq	Ag NP-NM300K	ENSG00000143256	Up	prefoldin subunit 2	PFDN2							203	Silver	Ag NP-NM300K	Down	gluconeogenesis	HumanCyc	0		17 (26)	1	1	3	HMDB03345;HMDB00156;HMDB00516	7 (26)	0.00554	0.631	0.0343	0.371
204	Silver	RNAseq	Ag NP-NM300K	ENSG00000115267	Up	interferon induced with helicase C domain 1	IFIH1							204	Silver	Ag NP-NM300K	Down	Fanconi-bickel syndrome	SMPDB	0		11 (15)	1	1	3	HMDB03345;HMDB00122;HMDB00516	7 (24)	0.00554	0.631	0.0343	0.371
205	Silver	RNAseq	Ag NP-NM300K	ENSG00000105185	Up	programmed cell death 5	PDCD5							205	Silver	Ag NP-NM300K	Down	Glycolysis	SMPDB	0		11 (15)	1	1	3	HMDB03345;HMDB00122;HMDB00516	7 (24)	0.00554	0.631	0.0343	0.371
206	Silver	RNAseq	Ag NP-NM300K	ENSG00000180964	Up	transcription elongation factor A like 8	TCEAL8							206	Silver	Ag NP-NM300K	Down	Glycogenosis_ Type VII. Tarui disease	SMPDB	0		11 (15)	1	1	3	HMDB03345;HMDB00122;HMDB00516	7 (24)	0.00554	0.631	0.0343	0.371
207	Silver	RNAseq	Ag NP-NM300K	ENSG00000165502	Up	ribosomal protein L36a like	RPL36AL							207	Silver	Ag NP-NM300K	Down	Fructose and mannose metabolism	EHMN	0		10 (21)	1	1	3	HMDB00169;HMDB00122;HMDB03345	7 (34)	0.00554	0.631	0.0343	0.371
208	Silver	RNAseq	Ag NP-NM300K	ENSG00000164251	Up	F2R like trypsin receptor 1	F2RL1							208	Silver	Ag NP-NM300K	Down	Integrin cell surface interactions	Reactome	3	ENSG00000213949;ENSG00000134871;ENSG00000039068	44 (68)	0.0112	0.385	0		0 (1)	1	1	0.0112	0.385
209	Silver	RNAseq	Ag NP-NM300K	ENSG00000241343	Up	ribosomal protein L36a	RPL36A							209	Silver	Ag NP-NM300K	Down	SLC-mediated transmembrane transport	Reactome	5	ENSG00000155465;ENSG00000110628;ENSG00000113504;ENSG00000164638;ENSG00000146477	170 (286)	0.0344	0.901	5	HMDB00169;HMDB00156;HMDB00211;HMDB00208;HMDB03345	52 (173)	0.182	1	0.038	0.401
210	Silver	RNAseq	Ag NP-NM300K	ENSG00000152661	Up	gap junction protein alpha 1	GJA1							210	Silver	Ag NP-NM300K	Down	Protein digestion and absorption - Homo sapiens (human)	KEGG	3	ENSG00000155465;ENSG00000134871;ENSG00000137731	36 (90)	0.00643	0.365	0		31 (47)	1	1	0.0389	0.401
211	Silver	RNAseq	Ag NP-NM300K	ENSG00000074527	Up	netrin 4	NTN4							211	Silver	Ag NP-NM300K	Down	Tyrosine metabolism - Homo sapiens (human)	KEGG	2	ENSG00000113924;ENSG00000132437	17 (35)	0.0137	0.459	2	HMDB04062;HMDB01490	27 (78)	0.484	1	0.0399	0.401
212	Silver	RNAseq	Ag NP-NM300K	ENSG00000138772	Up	annexin A3	ANXA3							212	Silver	Ag NP-NM300K	Down	Glucagon signaling pathway - Homo sapiens (human)	KEGG	1	ENSG00000109819	74 (103)	0.548	1	3	HMDB00122;HMDB00156;HMDB00208	9 (26)	0.0123	0.873	0.0404	0.401
213	Silver	RNAseq	Ag NP-NM300K	ENSG00000115525	Up	ST3 beta-galactoside alpha-2,3-sialyltransferase 5	ST3GAL5							213	Silver	Ag NP-NM300K	Down	Transport to the Golgi and subsequent modification	Reactome	1	ENSG00000105438	142 (165)	0.784	1	2	HMDB00169;HMDB03345	3 (36)	0.00975	0.794	0.0449	0.401
214	Silver	RNAseq	Ag NP-NM300K	ENSG00000065923	Up	solute carrier family 9 member A7	SLC9A7							214	Silver	Ag NP-NM300K	Down	chondroitin sulfate degradation (metazoa)	HumanCyc	0		5 (7)	1	1	5	HMDB00660;HMDB03345;HMDB03449;HMDB00143;HMDB00516	23 (137)	0.00803	0.794	0.0468	0.401
215	Silver	RNAseq	Ag NP-NM300K	ENSG00000003436	Up	tissue factor pathway inhibitor	TFPI							215	Silver	Ag NP-NM300K	Down	dermatan sulfate degradation (metazoa)	HumanCyc	0		4 (5)	1	1	5	HMDB00660;HMDB03345;HMDB03449;HMDB00143;HMDB00516	23 (138)	0.00803	0.794	0.0468	0.401
216	Silver	RNAseq	Ag NP-NM300K	ENSG00000136153	Up	LIM domain 7	LMO7							216	Silver	Ag NP-NM300K	Down	Pathway_PA165986194 -need delete	PharmGKB	2	ENSG00000241119;ENSG00000167165	13 (24)	0.00807	0.37	0		1 (2)	1	1	0.047	0.401
217	Silver	RNAseq	Ag NP-NM300K	ENSG00000147394	Up	zinc finger protein 185 (LIM domain)	ZNF185							217	Silver	Ag NP-NM300K	Down	Acetaminophen Pathway_ Pharmacokinetics	PharmGKB	2	ENSG00000241119;ENSG00000167165	13 (24)	0.00807	0.37	0		1 (2)	1	1	0.047	0.401
218	Silver	RNAseq	Ag NP-NM300K	ENSG00000115539	Up	phosducin like 3	PDCL3							218	Silver	Ag NP-NM300K	Down	Lysine catabolism	Reactome	0		10 (12)	1	1	3	HMDB00510;HMDB00208;HMDB00225	8 (32)	0.00852	0.794	0.0491	0.401
219	Silver	RNAseq	Ag NP-NM300K	ENSG00000180329	Up	coiled-coil domain containing 43	CCDC43							219	Silver	Ag NP-NM300K	Down	Lysine biosynthesis - Homo sapiens (human)	KEGG	0		2 (2)	1	1	3	HMDB00208;HMDB00510;HMDB00225	8 (35)	0.00852	0.794	0.0491	0.401
220	Silver	RNAseq	Ag NP-NM300K	ENSG00000023608	Up	small nuclear RNA activating complex polypeptide 1	SNAPC1							220	Silver	Ag NP-NM300K	Down	lysine degradation II (pipecolate pathway)	HumanCyc	0		5 (6)	1	1	3	HMDB00208;HMDB00225;HMDB00510	8 (21)	0.00852	0.794	0.0491	0.401
221	Silver	RNAseq	Ag NP-NM300K	ENSG00000028203	Up	vezatin, adherens junctions transmembrane protein	VEZT							220	Zinc	ZnO NP-NM111	Down	Galactose Metabolism	SMPDB						6	HMDB00660;HMDB00169;HMDB03345;HMDB00122;HMDB00143;HMDB00211	10 (36)	2.75e-07	0.000548		0.000548
222	Silver	RNAseq	Ag NP-NM300K	ENSG00000144824	Up	pleckstrin homology like domain family B member 2	PHLDB2							220	Zinc	ZnO NP-NM111	Down	Galactosemia	SMPDB						6	HMDB00660;HMDB00169;HMDB03345;HMDB00122;HMDB00143;HMDB00211	10 (36)	2.75e-07	0.000548		0.000548
223	Silver	RNAseq	Ag NP-NM300K	ENSG00000119900	Up	opioid growth factor receptor like 1	OGFRL1							220	Zinc	ZnO NP-NM111	Down	Galactose metabolism - Homo sapiens (human)	KEGG						6	HMDB00169;HMDB03418;HMDB03345;HMDB00122;HMDB00143;HMDB00211	11 (45)	5.91e-07	0.000786		0.000786
224	Silver	RNAseq	Ag NP-NM300K	ENSG00000138326	Up	ribosomal protein S24	RPS24							220	Zinc	ZnO NP-NM111	Down	Amino sugar and nucleotide sugar metabolism - Homo sapiens (human)	KEGG						5	HMDB00660;HMDB00169;HMDB00122;HMDB00143;HMDB03345	11 (108)	1.99e-05	0.0199		0.0199
225	Silver	RNAseq	Ag NP-NM300K	ENSG00000240694	Up	paraneoplastic Ma antigen 2	PNMA2
226	Silver	RNAseq	Ag NP-NM300K	ENSG00000125691	Up	ribosomal protein L23	RPL23
227	Silver	RNAseq	Ag NP-NM300K	ENSG00000137962	Up	Rho GTPase activating protein 29	ARHGAP29
228	Silver	RNAseq	Ag NP-NM300K	ENSG00000128609	Up	NADH:ubiquinone oxidoreductase subunit A5	NDUFA5
229	Silver	RNAseq	Ag NP-NM300K	ENSG00000153250	Up	RNA binding motif single stranded interacting protein 1	RBMS1
230	Silver	RNAseq	Ag NP-NM300K	ENSG00000173418	Up	N(alpha)-acetyltransferase 20, NatB catalytic subunit	NAA20
231	Silver	RNAseq	Ag NP-NM300K	ENSG00000187790	Up	Fanconi anemia complementation group M	FANCM
232	Silver	RNAseq	Ag NP-NM300K	ENSG00000169429	Up	C-X-C motif chemokine ligand 8	CXCL8
233	Silver	RNAseq	Ag NP-NM300K	ENSG00000171793	Up	CTP synthase 1	CTPS1
234	Silver	RNAseq	Ag NP-NM300K	ENSG00000204856	Up	family with sequence similarity 216 member A	FAM216A
235	Silver	RNAseq	Ag NP-NM300K	ENSG00000125977	Up	eukaryotic translation initiation factor 2 subunit beta	EIF2S2
236	Silver	RNAseq	Ag NP-NM300K	ENSG00000039560	Up	retinoic acid induced 14	RAI14
237	Silver	RNAseq	Ag NP-NM300K	ENSG00000065978	Up	Y-box binding protein 1	YBX1
238	Silver	RNAseq	Ag NP-NM300K	ENSG00000158125	Up	xanthine dehydrogenase	XDH
239	Silver	RNAseq	Ag NP-NM300K	ENSG00000104626	Up	exoribonuclease 1	ERI1
240	Silver	RNAseq	Ag NP-NM300K	ENSG00000128512	Up	dedicator of cytokinesis 4	DOCK4
241	Silver	RNAseq	Ag NP-NM300K	ENSG00000213626	Up	limb bud and heart development	LBH
242	Silver	RNAseq	Ag NP-NM300K	ENSG00000111716	Up	lactate dehydrogenase B	LDHB
243	Silver	RNAseq	Ag NP-NM300K	ENSG00000173221	Up	glutaredoxin	GLRX
244	Silver	RNAseq	Ag NP-NM300K	ENSG00000144036	Up	exocyst complex component 6B	EXOC6B
245	Silver	RNAseq	Ag NP-NM300K	ENSG00000121895	Up	transmembrane protein 156	TMEM156
246	Silver	RNAseq	Ag NP-NM300K	ENSG00000114942	Up	eukaryotic translation elongation factor 1 beta 2	EEF1B2
247	Silver	RNAseq	Ag NP-NM300K	ENSG00000198648	Up	serine/threonine kinase 39	STK39
248	Silver	RNAseq	Ag NP-NM300K	ENSG00000150687	Up	protease, serine 23	PRSS23
249	Silver	RNAseq	Ag NP-NM300K	ENSG00000136940	Up	phosducin like	PDCL
250	Silver	RNAseq	Ag NP-NM300K	ENSG00000187514	Up	prothymosin, alpha	PTMA
251	Silver	RNAseq	Ag NP-NM300K	ENSG00000198380	Up	glutamine--fructose-6-phosphate transaminase 1	GFPT1
252	Silver	RNAseq	Ag NP-NM300K	ENSG00000143776	Up	CDC42 binding protein kinase alpha	CDC42BPA
253	Silver	RNAseq	Ag NP-NM300K	ENSG00000012963	Up	ubiquitin protein ligase E3 component n-recognin 7 (putative)	UBR7
254	Silver	RNAseq	Ag NP-NM300K	ENSG00000076321	Up	kelch like family member 20	KLHL20
255	Silver	RNAseq	Ag NP-NM300K	ENSG00000198677	Up	tetratricopeptide repeat domain 37	TTC37
256	Silver	RNAseq	Ag NP-NM300K	ENSG00000167460	Up	tropomyosin 4	TPM4
257	Silver	RNAseq	Ag NP-NM300K	ENSG00000085491	Up	solute carrier family 25 member 24	SLC25A24
258	Silver	RNAseq	Ag NP-NM300K	ENSG00000173889	Up	polyhomeotic homolog 3	PHC3
259	Silver	RNAseq	Ag NP-NM300K	ENSG00000184743	Up	atlastin GTPase 3	ATL3
260	Silver	RNAseq	Ag NP-NM300K	ENSG00000147650	Up	LDL receptor related protein 12	LRP12
261	Silver	RNAseq	Ag NP-NM300K	ENSG00000164220	Up	coagulation factor II thrombin receptor like 2	F2RL2
262	Silver	RNAseq	Ag NP-NM300K	ENSG00000187720	Up	thrombospondin type 1 domain containing 4	THSD4
263	Silver	RNAseq	Ag NP-NM300K	ENSG00000120875	Up	dual specificity phosphatase 4	DUSP4
264	Silver	RNAseq	Ag NP-NM300K	ENSG00000169604	Up	anthrax toxin receptor 1	ANTXR1
265	Silver	RNAseq	Ag NP-NM300K	ENSG00000149289	Up	zinc finger CCCH-type containing 12C	ZC3H12C
266	Silver	RNAseq	Ag NP-NM300K	ENSG00000139324	Up	transmembrane and tetratricopeptide repeat containing 3	TMTC3
267	Silver	RNAseq	Ag NP-NM300K	ENSG00000123219	Up	centromere protein K	CENPK
268	Silver	RNAseq	Ag NP-NM300K	ENSG00000151012	Up	solute carrier family 7 member 11	SLC7A11
269	Silver	RNAseq	Ag NP-NM300K	ENSG00000108395	Up	tripartite motif containing 37	TRIM37
270	Silver	RNAseq	Ag NP-NM300K	ENSG00000186660	Up	ZFP91 zinc finger protein	ZFP91
271	Silver	RNAseq	Ag NP-NM300K	ENSG00000091129	Up	neuronal cell adhesion molecule	NRCAM
272	Silver	RNAseq	Ag NP-NM300K	ENSG00000128989	Up	cAMP regulated phosphoprotein 19	ARPP19
273	Silver	RNAseq	Ag NP-NM300K	ENSG00000263244	Up	RP11-473I1.9 3prime_overlapping_ncRNA	RP11-473I1.9
274	Silver	RNAseq	Ag NP-NM300K	ENSG00000101310	Up	Sec23 homolog B, coat complex II component	SEC23B
275	Silver	RNAseq	Ag NP-NM300K	ENSG00000185344	Up	ATPase H+ transporting V0 subunit a2	ATP6V0A2
276	Silver	RNAseq	Ag NP-NM300K	ENSG00000178538	Up	carbonic anhydrase 8	CA8
277	Silver	RNAseq	Ag NP-NM300K	ENSG00000073614	Up	lysine demethylase 5A	KDM5A
278	Silver	RNAseq	Ag NP-NM300K	ENSG00000213064	Up	SFT2 domain containing 2	SFT2D2
279	Silver	RNAseq	Ag NP-NM300K	ENSG00000064726	Up	BTB domain containing 1	BTBD1
280	Silver	RNAseq	Ag NP-NM300K	ENSG00000131711	Up	microtubule associated protein 1B	MAP1B
281	Silver	RNAseq	Ag NP-NM300K	ENSG00000122863	Up	carbohydrate sulfotransferase 3	CHST3
282	Silver	RNAseq	Ag NP-NM300K	ENSG00000131375	Up	calpain 7	CAPN7
283	Silver	RNAseq	Ag NP-NM300K	ENSG00000106771	Up	transmembrane protein 245	TMEM245
284	Silver	RNAseq	Ag NP-NM300K	ENSG00000055332	Up	eukaryotic translation initiation factor 2 alpha kinase 2	EIF2AK2
285	Silver	RNAseq	Ag NP-NM300K	ENSG00000071794	Up	helicase like transcription factor	HLTF
286	Silver	RNAseq	Ag NP-NM300K	ENSG00000168807	Up	syntrophin beta 2	SNTB2
287	Silver	RNAseq	Ag NP-NM300K	ENSG00000240720	Up	leucine rich repeats and death domain containing 1	LRRD1
288	Silver	RNAseq	Ag NP-NM300K	ENSG00000065328	Up	minichromosome maintenance 10 replication initiation factor	MCM10
289	Silver	RNAseq	Ag NP-NM300K	ENSG00000137055	Up	phospholipase A2 activating protein	PLAA
290	Silver	RNAseq	Ag NP-NM300K	ENSG00000144357	Up	ubiquitin protein ligase E3 component n-recognin 3 (putative)	UBR3
291	Silver	RNAseq	Ag NP-NM300K	ENSG00000173193	Up	poly(ADP-ribose) polymerase family member 14	PARP14
292	Silver	RNAseq	Ag NP-NM300K	ENSG00000138061	Up	cytochrome P450 family 1 subfamily B member 1	CYP1B1
293	Silver	RNAseq	Ag NP-NM300K	ENSG00000137491	Up	solute carrier organic anion transporter family member 2B1	SLCO2B1
294	Silver	RNAseq	Ag NP-NM300K	ENSG00000185567	Up	AHNAK nucleoprotein 2	AHNAK2
295	Silver	RNAseq	Ag NP-NM300K	ENSG00000145012	Up	LIM domain containing preferred translocation partner in lipoma	LPP
296	Silver	RNAseq	Ag NP-NM300K	ENSG00000116991	Up	signal induced proliferation associated 1 like 2	SIPA1L2
297	Silver	RNAseq	Ag NP-NM300K	ENSG00000101003	Up	GINS complex subunit 1	GINS1
298	Silver	RNAseq	Ag NP-NM300K	ENSG00000131389	Up	solute carrier family 6 member 6	SLC6A6
299	Silver	RNAseq	Ag NP-NM300K	ENSG00000148358	Up	G protein-coupled receptor 107	GPR107
300	Silver	RNAseq	Ag NP-NM300K	ENSG00000112419	Up	phosphatase and actin regulator 2	PHACTR2
301	Silver	RNAseq	Ag NP-NM300K	ENSG00000111696	Up	5-nucleotidase domain containing 3	NT5DC3
302	Silver	RNAseq	Ag NP-NM300K	ENSG00000100731	Up	pecanex homolog 1 (Drosophila)	PCNX1
303	Silver	RNAseq	Ag NP-NM300K	ENSG00000116199	Up	FAM20B, glycosaminoglycan xylosylkinase	FAM20B
304	Silver	RNAseq	Ag NP-NM300K	ENSG00000064393	Up	homeodomain interacting protein kinase 2	HIPK2
305	Silver	RNAseq	Ag NP-NM300K	ENSG00000065325	Up	glucagon like peptide 2 receptor	GLP2R
306	Silver	RNAseq	Ag NP-NM300K	ENSG00000196236	Up	X-prolyl aminopeptidase 3	XPNPEP3
307	Silver	RNAseq	Ag NP-NM300K	ENSG00000006611	Down	USH1 protein network component harmonin	USH1C
308	Silver	RNAseq	Ag NP-NM300K	ENSG00000255245	Down	FXYD6-FXYD2 readthrough	FXYD6-FXYD2
309	Silver	RNAseq	Ag NP-NM300K	ENSG00000241119	Down	UDP glucuronosyltransferase family 1 member A9	UGT1A9
310	Silver	RNAseq	Ag NP-NM300K	ENSG00000155465	Down	solute carrier family 7 member 7	SLC7A7
311	Silver	RNAseq	Ag NP-NM300K	ENSG00000137731	Down	FXYD domain containing ion transport regulator 2	FXYD2
312	Silver	RNAseq	Ag NP-NM300K	ENSG00000110057	Down	unc-93 homolog B1 (C. elegans)	UNC93B1
313	Silver	RNAseq	Ag NP-NM300K	ENSG00000160867	Down	fibroblast growth factor receptor 4	FGFR4
314	Silver	RNAseq	Ag NP-NM300K	ENSG00000242515	Down	UDP glucuronosyltransferase family 1 member A10	UGT1A10
315	Silver	RNAseq	Ag NP-NM300K	ENSG00000266714	Down	myosin XVB	MYO15B
316	Silver	RNAseq	Ag NP-NM300K	ENSG00000140538	Down	neurotrophic receptor tyrosine kinase 3	NTRK3
317	Silver	RNAseq	Ag NP-NM300K	ENSG00000125170	Down	docking protein 4	DOK4
318	Silver	RNAseq	Ag NP-NM300K	ENSG00000168476	Down	receptor accessory protein 4	REEP4
319	Silver	RNAseq	Ag NP-NM300K	ENSG00000135100	Down	HNF1 homeobox A	HNF1A
320	Silver	RNAseq	Ag NP-NM300K	ENSG00000167165	Down	UDP glucuronosyltransferase family 1 member A6	UGT1A6
321	Silver	RNAseq	Ag NP-NM300K	ENSG00000244122	Down	UDP glucuronosyltransferase family 1 member A7	UGT1A7
322	Silver	RNAseq	Ag NP-NM300K	ENSG00000109062	Down	SLC9A3 regulator 1	SLC9A3R1
323	Silver	RNAseq	Ag NP-NM300K	ENSG00000242366	Down	UDP glucuronosyltransferase family 1 member A8	UGT1A8
324	Silver	RNAseq	Ag NP-NM300K	ENSG00000108375	Down	ring finger protein 43	RNF43
325	Silver	RNAseq	Ag NP-NM300K	ENSG00000244474	Down	UDP glucuronosyltransferase family 1 member A4	UGT1A4
326	Silver	RNAseq	Ag NP-NM300K	ENSG00000075234	Down	tetratricopeptide repeat domain 38	TTC38
327	Silver	RNAseq	Ag NP-NM300K	ENSG00000086548	Down	carcinoembryonic antigen related cell adhesion molecule 6	CEACAM6
328	Silver	RNAseq	Ag NP-NM300K	ENSG00000187634	Down	sterile alpha motif domain containing 11	SAMD11
329	Silver	RNAseq	Ag NP-NM300K	ENSG00000120211	Down	insulin like 4	INSL4
330	Silver	RNAseq	Ag NP-NM300K	ENSG00000125648	Down	solute carrier family 25 member 23	SLC25A23
331	Silver	RNAseq	Ag NP-NM300K	ENSG00000185551	Down	nuclear receptor subfamily 2 group F member 2	NR2F2
332	Silver	RNAseq	Ag NP-NM300K	ENSG00000110628	Down	solute carrier family 22 member 18	SLC22A18
333	Silver	RNAseq	Ag NP-NM300K	ENSG00000146674	Down	insulin like growth factor binding protein 3	IGFBP3
334	Silver	RNAseq	Ag NP-NM300K	ENSG00000145920	Down	complexin 2	CPLX2
335	Silver	RNAseq	Ag NP-NM300K	ENSG00000164050	Down	plexin B1	PLXNB1
336	Silver	RNAseq	Ag NP-NM300K	ENSG00000266036	Down	RP11-452I5.2 antisense	RP11-452I5.2
337	Silver	RNAseq	Ag NP-NM300K	ENSG00000088002	Down	sulfotransferase family 2B member 1	SULT2B1
338	Silver	RNAseq	Ag NP-NM300K	ENSG00000169903	Down	transmembrane 4 L six family member 4	TM4SF4
339	Silver	RNAseq	Ag NP-NM300K	ENSG00000167600	Down	cytochrome P450 family 2 subfamily S member 1	CYP2S1
340	Silver	RNAseq	Ag NP-NM300K	ENSG00000109819	Down	PPARG coactivator 1 alpha	PPARGC1A
341	Silver	RNAseq	Ag NP-NM300K	ENSG00000226950	Down	differentiation antagonizing non-protein coding RNA	DANCR
342	Silver	RNAseq	Ag NP-NM300K	ENSG00000153707	Down	protein tyrosine phosphatase, receptor type D	PTPRD
343	Silver	RNAseq	Ag NP-NM300K	ENSG00000186907	Down	reticulon 4 receptor-like 2	RTN4RL2
344	Silver	RNAseq	Ag NP-NM300K	ENSG00000143443	Down	chromosome 1 open reading frame 56	C1orf56
345	Silver	RNAseq	Ag NP-NM300K	ENSG00000136881	Down	bile acid-CoA:amino acid N-acyltransferase	BAAT
346	Silver	RNAseq	Ag NP-NM300K	ENSG00000103145	Down	host cell factor C1 regulator 1	HCFC1R1
347	Silver	RNAseq	Ag NP-NM300K	ENSG00000226608	Down	ferritin light chain pseudogene 3	FTLP3
348	Silver	RNAseq	Ag NP-NM300K	ENSG00000100031	Down	gamma-glutamyltransferase 1	GGT1
349	Silver	RNAseq	Ag NP-NM300K	ENSG00000105388	Down	carcinoembryonic antigen related cell adhesion molecule 5	CEACAM5
350	Silver	RNAseq	Ag NP-NM300K	ENSG00000255301	Down	RP11-624G17.3 antisense	RP11-624G17.3
351	Silver	RNAseq	Ag NP-NM300K	ENSG00000125968	Down	inhibitor of DNA binding 1, HLH protein	ID1
352	Silver	RNAseq	Ag NP-NM300K	ENSG00000183091	Down	nebulin	NEB
353	Silver	RNAseq	Ag NP-NM300K	ENSG00000243135	Down	UDP glucuronosyltransferase family 1 member A3	UGT1A3
354	Silver	RNAseq	Ag NP-NM300K	ENSG00000237289	Down	creatine kinase, mitochondrial 1B	CKMT1B
355	Silver	RNAseq	Ag NP-NM300K	ENSG00000240224	Down	UDP glucuronosyltransferase family 1 member A5	UGT1A5
356	Silver	RNAseq	Ag NP-NM300K	ENSG00000218336	Down	teneurin transmembrane protein 3	TENM3
357	Silver	RNAseq	Ag NP-NM300K	ENSG00000039068	Down	cadherin 1	CDH1
358	Silver	RNAseq	Ag NP-NM300K	ENSG00000105722	Down	ETS2 repressor factor	ERF
359	Silver	RNAseq	Ag NP-NM300K	ENSG00000107159	Down	carbonic anhydrase 9	CA9
360	Silver	RNAseq	Ag NP-NM300K	ENSG00000167302	Down	TEPSIN, adaptor related protein complex 4 accessory protein	TEPSIN
361	Silver	RNAseq	Ag NP-NM300K	ENSG00000103043	Down	Vac14, PIKFYVE complex component	VAC14
362	Silver	RNAseq	Ag NP-NM300K	ENSG00000175745	Down	nuclear receptor subfamily 2 group F member 1	NR2F1
363	Silver	RNAseq	Ag NP-NM300K	ENSG00000176153	Down	glutathione peroxidase 2	GPX2
364	Silver	RNAseq	Ag NP-NM300K	ENSG00000134871	Down	collagen type IV alpha 2 chain	COL4A2
365	Silver	RNAseq	Ag NP-NM300K	ENSG00000163348	Down	pygopus family PHD finger 2	PYGO2
366	Silver	RNAseq	Ag NP-NM300K	ENSG00000164896	Down	Fas activated serine/threonine kinase	FASTK
367	Silver	RNAseq	Ag NP-NM300K	ENSG00000127948	Down	cytochrome p450 oxidoreductase	POR
368	Silver	RNAseq	Ag NP-NM300K	ENSG00000172269	Down	dolichyl-phosphate N-acetylglucosaminephosphotransferase 1	DPAGT1
369	Silver	RNAseq	Ag NP-NM300K	ENSG00000130545	Down	crumbs 3, cell polarity complex component	CRB3
370	Silver	RNAseq	Ag NP-NM300K	ENSG00000119888	Down	epithelial cell adhesion molecule	EPCAM
371	Silver	RNAseq	Ag NP-NM300K	ENSG00000133636	Down	neurotensin	NTS
372	Silver	RNAseq	Ag NP-NM300K	ENSG00000250799	Down	proline dehydrogenase 2	PRODH2
373	Silver	RNAseq	Ag NP-NM300K	ENSG00000122390	Down	N(alpha)-acetyltransferase 60, NatF catalytic subunit	NAA60
374	Silver	RNAseq	Ag NP-NM300K	ENSG00000272333	Down	lysine methyltransferase 2B	KMT2B
375	Silver	RNAseq	Ag NP-NM300K	ENSG00000113924	Down	homogentisate 1,2-dioxygenase	HGD
376	Silver	RNAseq	Ag NP-NM300K	ENSG00000182310	Down	sperm acrosome associated 6	SPACA6
377	Silver	RNAseq	Ag NP-NM300K	ENSG00000243989	Down	aminoacylase 1	ACY1
378	Silver	RNAseq	Ag NP-NM300K	ENSG00000155849	Down	engulfment and cell motility 1	ELMO1
379	Silver	RNAseq	Ag NP-NM300K	ENSG00000164638	Down	solute carrier family 29 member 4	SLC29A4
380	Silver	RNAseq	Ag NP-NM300K	ENSG00000132437	Down	dopa decarboxylase	DDC
381	Silver	RNAseq	Ag NP-NM300K	ENSG00000038427	Down	versican	VCAN
382	Silver	RNAseq	Ag NP-NM300K	ENSG00000137133	Down	histidine triad nucleotide binding protein 2	HINT2
383	Silver	RNAseq	Ag NP-NM300K	ENSG00000176340	Down	cytochrome c oxidase subunit 8A	COX8A
384	Silver	RNAseq	Ag NP-NM300K	ENSG00000134824	Down	fatty acid desaturase 2	FADS2
385	Silver	RNAseq	Ag NP-NM300K	ENSG00000167797	Down	cyclin dependent kinase 2 associated protein 2	CDK2AP2
386	Silver	RNAseq	Ag NP-NM300K	ENSG00000204371	Down	euchromatic histone lysine methyltransferase 2	EHMT2
387	Silver	RNAseq	Ag NP-NM300K	ENSG00000187961	Down	kelch like family member 17	KLHL17
388	Silver	RNAseq	Ag NP-NM300K	ENSG00000134215	Down	vav guanine nucleotide exchange factor 3	VAV3
389	Silver	RNAseq	Ag NP-NM300K	ENSG00000135437	Down	retinol dehydrogenase 5	RDH5
390	Silver	RNAseq	Ag NP-NM300K	ENSG00000168955	Down	transmembrane 4 L six family member 20	TM4SF20
391	Silver	RNAseq	Ag NP-NM300K	ENSG00000164690	Down	sonic hedgehog	SHH
392	Silver	RNAseq	Ag NP-NM300K	ENSG00000144579	Down	CTD small phosphatase 1	CTDSP1
393	Silver	RNAseq	Ag NP-NM300K	ENSG00000114786	Down	ABHD14A-ACY1 readthrough	ABHD14A-ACY1
394	Silver	RNAseq	Ag NP-NM300K	ENSG00000223764	Down	RP11-54O7.3 lincRNA	RP11-54O7.3
395	Silver	RNAseq	Ag NP-NM300K	ENSG00000100416	Down	tRNA 5-methylaminomethyl-2-thiouridylate methyltransferase	TRMU
396	Silver	RNAseq	Ag NP-NM300K	ENSG00000146477	Down	solute carrier family 22 member 3	SLC22A3
397	Silver	RNAseq	Ag NP-NM300K	ENSG00000087086	Down	ferritin light chain	FTL
398	Silver	RNAseq	Ag NP-NM300K	ENSG00000124702	Down	kelch domain containing 3	KLHDC3
399	Silver	RNAseq	Ag NP-NM300K	ENSG00000187736	Down	non-homologous end joining factor 1	NHEJ1
400	Silver	RNAseq	Ag NP-NM300K	ENSG00000008517	Down	interleukin 32	IL32
401	Silver	RNAseq	Ag NP-NM300K	ENSG00000118242	Down	melanoregulin	MREG
402	Silver	RNAseq	Ag NP-NM300K	ENSG00000213949	Down	integrin subunit alpha 1	ITGA1
403	Silver	RNAseq	Ag NP-NM300K	ENSG00000167889	Down	mannosyl (alpha-1,6-)-glycoprotein beta-1,6-N-acetyl-glucosaminyltransferase, isozyme B	MGAT5B
404	Silver	RNAseq	Ag NP-NM300K	ENSG00000143198	Down	microsomal glutathione S-transferase 3	MGST3
405	Silver	RNAseq	Ag NP-NM300K	ENSG00000269028	Down	MT-RNR2-like 12	MTRNR2L12
406	Silver	RNAseq	Ag NP-NM300K	ENSG00000113504	Down	solute carrier family 12 member 7	SLC12A7
407	Silver	RNAseq	Ag NP-NM300K	ENSG00000099875	Down	MAP kinase interacting serine/threonine kinase 2	MKNK2
408	Silver	RNAseq	Ag NP-NM300K	ENSG00000180044	Down	chromosome 3 open reading frame 80	C3orf80
409	Silver	RNAseq	Ag NP-NM300K	ENSG00000162433	Down	adenylate kinase 4	AK4
410	Silver	RNAseq	Ag NP-NM300K	ENSG00000176248	Down	anaphase promoting complex subunit 2	ANAPC2
411	Silver	RNAseq	Ag NP-NM300K	ENSG00000173171	Down	metaxin 1	MTX1
412	Silver	RNAseq	Ag NP-NM300K	ENSG00000038358	Down	enhancer of mRNA decapping 4	EDC4
413	Silver	RNAseq	Ag NP-NM300K	ENSG00000124564	Down	solute carrier family 17 member 3	SLC17A3
414	Silver	RNAseq	Ag NP-NM300K	ENSG00000109736	Down	major facilitator superfamily domain containing 10	MFSD10
415	Silver	RNAseq	Ag NP-NM300K	ENSG00000180198	Down	regulator of chromosome condensation 1	RCC1
416	Silver	RNAseq	Ag NP-NM300K	ENSG00000116455	Down	WD repeat domain 77	WDR77
417	Silver	RNAseq	Ag NP-NM300K	ENSG00000143624	Down	integrator complex subunit 3	INTS3
418	Silver	RNAseq	Ag NP-NM300K	ENSG00000105438	Down	KDEL endoplasmic reticulum protein retention receptor 1	KDELR1
419	Silver	RNAseq	Ag NP-NM300K	ENSG00000009950	Down	MLX interacting protein like	MLXIPL
420	Silver	RNAseq	Ag NP-NM300K	ENSG00000256802	Down	RP11-680F8.1 antisense	RP11-680F8.1
421	Silver	RNAseq	Ag NP-NM300K	ENSG00000128311	Down	thiosulfate sulfurtransferase	TST
422	Silver	RNAseq	Ag NP-NM300K	ENSG00000175826	Down	CTD nuclear envelope phosphatase 1	CTDNEP1
422	Zinc	Polar Metabolomics	ZnO NP-NM110	351.287	Down	Polyoxyethylene 40 monostearate, 2(R)-hydroxyicosanoic acid, 12-hydroxyicosanoic acid, 15-hydroxyicosanoic acid, 2-hydroxyphytanic acid	C20H40O3	HMDB32477;HMDB61659;HMDB61664;HMDB61665;HMDB61666
423	Zinc	Polar Metabolomics	ZnO NP-NM110	485.157	Down	Estrone glucuronide, Cubebininolide, 5-O-Methylmelledonal]	C24H30O8	HMDB04483;HMDB32728;HMDB35859	LMST05010011;
424	Zinc	Polar Metabolomics	ZnO NP-NM110	428.202	Down
425	Zinc	Polar Metabolomics	ZnO NP-NM110	427.199	Down
426	Zinc	Polar Metabolomics	ZnO NP-NM110	369.24	Down	MG(0:0/16:0/0:0), MG(16:0/0:0/0:0), Glycerol 1-hexadecanoate;Methyl-[10]-shogaol, Ginkgoic acid, Siderol, ent-17-Acetoxy-16b-kauran-19-al, Volemolide, (R)-3,4-Dihydro-8-hydroxy-3-tridecyl-1H-2-benzopyran-1-one	C19H38O4;C22H34O3	HMDB11533;HMDB11564;HMDB31074;HMDB31465;HMDB33897;HMDB34944;HMDB36722;HMDB41001;HMDB41302	LMGL01010025;LMGL01010009;
427	Zinc	Polar Metabolomics	ZnO NP-NM110	356.274	Down
428	Zinc	Polar Metabolomics	ZnO NP-NM110	371.238	Down	MG(0:0/16:0/0:0), MG(16:0/0:0/0:0), Glycerol 1-hexadecanoate	C19H38O4	HMDB11533;HMDB11564;HMDB31074	LMGL01010025;LMGL01010009;
429	Zinc	Polar Metabolomics	ZnO NP-NM110	370.243	Down
430	Zinc	Polar Metabolomics	ZnO NP-NM110	365.303	Down	MG(P-18:0e/0:0/0:0), Propylene glycol stearate	C21H42O3	HMDB11153;HMDB29764
431	Zinc	Polar Metabolomics	ZnO NP-NM110	437.324	Down
432	Zinc	Polar Metabolomics	ZnO NP-NM110	504.14	Down	Pivampicillin	C22H29N3O6S	HMDB15542
433	Zinc	Polar Metabolomics	ZnO NP-NM110	570.233	Down	N-[(3a,5b,7b)-7-hydroxy-24-oxo-3-(sulfooxy)cholan-24-yl]-Glycine, N-[(3a,5b,7a)-3-hydroxy-24-oxo-7-(sulfooxy)cholan-24-yl]-Glycine, Glycochenodeoxycholate-3-sulfate	C26H43NO8S	HMDB02409;HMDB02496;HMDB02497	LMST05030012;LMST05030005;
434	Zinc	Polar Metabolomics	ZnO NP-NM111	256.98	Up
435	Zinc	Polar Metabolomics	ZnO NP-NM111	293.136	Up	Histidinyl-Histidine	C12H16N6O3	HMDB28887
436	Zinc	Polar Metabolomics	ZnO NP-NM111	204.123	Up	L-Acetylcarnitine	C9H17NO4	HMDB00201
437	Zinc	Polar Metabolomics	ZnO NP-NM111	196.066	Up
438	Zinc	Polar Metabolomics	ZnO NP-NM111	295.876	Up
439	Zinc	Polar Metabolomics	ZnO NP-NM111	237.918	Up
440	Zinc	Polar Metabolomics	ZnO NP-NM111	177.962	Up
441	Zinc	Polar Metabolomics	ZnO NP-NM111	98.0212	Up	Glycine, Acetohydroxamic Acid, Ethyl nitrite	C2H5NO2	HMDB00123;HMDB14691;HMDB31239
442	Zinc	Polar Metabolomics	ZnO NP-NM111	328.999	Down
443	Zinc	Polar Metabolomics	ZnO NP-NM111	204.056	Down
444	Zinc	Polar Metabolomics	ZnO NP-NM111	330.996	Down	(S)-5-Diphosphomevalonic acid, (R)-Mevalonic acid-5-pyrophosphate	C6H14O10P2	HMDB01090;HMDB01981	LMFA01050416;
445	Zinc	Polar Metabolomics	ZnO NP-NM111	367.245	Down
446	Zinc	Polar Metabolomics	ZnO NP-NM111	516.981	Down
447	Zinc	Polar Metabolomics	ZnO NP-NM111	221.025	Down	D-Glucose, D-Galactose, D-Mannose, Myoinositol, 3-Deoxyarabinohexonic acid, Beta-D-Glucose, D-Fructose, Allose, L-Sorbose, Alpha-D-Glucose, D-Tagatose, Beta-D-Galactose, Scyllitol, L-Gulose, Dihydroxyacetone (dimer), L-Galactose, Levoinositol, Alpha-D-Glucopyranoside, D-Glucopyranoside	C6H12O6	HMDB00122;HMDB00143;HMDB00169;HMDB00211;HMDB00346;HMDB00516;HMDB00660;HMDB01151;HMDB01266;HMDB03345;HMDB03418;HMDB03449;HMDB06088;HMDB12326;HMDB32222;HMDB33704;HMDB34220;HMDB61922;HMDB62170
448	Zinc	Polar Metabolomics	ZnO NP-NM111	258.933	Down
449	Zinc	Polar Metabolomics	ZnO NP-NM111	568.171	Down	Gliquidone	C27H33N3O6S	HMDB15381
450	Zinc	Polar Metabolomics	ZnO NP-NM111	179.049	Down	Cysteinylglycine, Cysteinyl-Glycine, Glycyl-Cysteine	C5H10N2O3S	HMDB00078;HMDB28775;HMDB28838
451	Zinc	Polar Metabolomics	ZnO NP-NM111	223.012	Down	Ethionamide sulphoxide	C8H10N2OS	HMDB60624
452	Zinc	Polar Metabolomics	ZnO NP-NM111	240.095	Down	N-a-Acetylcitrulline, Alanyl-Glutamine, Alanyl-Gamma-glutamate, Glutaminyl-Alanine, Gamma-glutamyl-Alanine	C8H15N3O4	HMDB00856;HMDB28685;HMDB28701;HMDB28790;HMDB29142
453	Zinc	Polar Metabolomics	ZnO NP-NM111	169.058	Down	L-Glutamine, Ureidoisobutyric acid, D-Glutamine, Alanylglycine, Alanyl-Glycine	C5H10N2O3	HMDB00641;HMDB02031;HMDB03423;HMDB06899;HMDB28687
454	Zinc	Polar Metabolomics	ZnO NP-NM111	191.04	Down	6-Methylnicotinamide, 2-Acetyl-3-ethylpyrazine, 7,8-Dihydro-3-methylpyrrolo[1,2-a]pyrimidin-2(6H)-one, 2-Acetyl-3,6-dimethylpyrazine, 2-Acetyl-3,5-dimethylpyrazine	C8H10N2O	HMDB13704;HMDB29410;HMDB38513;HMDB39998;HMDB39999
455	Zinc	RNAseq	ZnO NP-NM111	ENSG00000092621	Up	phosphoglycerate dehydrogenase	PHGDH
